# Supplementary material for: The genetic architecture of the human cerebral cortex
Source: bioRxiv or medRxiv preprint supplement (doi:10.1101/399402), 2019-07-18

## QQ plots

| <b>Region#</b> | <b>Phenotype</b>                      | <b>Page</b> |
|----------------|---------------------------------------|-------------|
| 0              | Global                                | 2           |
| 1              | Frontal Pole                          | 3           |
| 2              | Medial Orbitofrontal                  | 4           |
| 3              | Lateral Orbitofrontal                 | 5           |
| 4              | Rostral Anterior Cingulate            | 6           |
| 5              | Caudal Anterior Cingulate             | 7           |
| 6              | Superior Frontal                      | 8           |
| 7              | Rostral Middle Frontal                | 9           |
| 8              | Pars Orbitalis                        | 10          |
| 9              | Pars Triangularis                     | 11          |
| 10             | Pars Opercularis                      | 12          |
| 11             | Caudal Middle Frontal                 | 13          |
| 12             | Paracentral                           | 14          |
| 13             | Precentral                            | 15          |
| 14             | Postcentral                           | 16          |
| 15             | Precuneus                             | 17          |
| 16             | Superior Parietal                     | 18          |
| 17             | Supramarginal                         | 19          |
| 18             | Inferior Parietal                     | 20          |
| 19             | Posterior Cingulate                   | 21          |
| 20             | Isthmus Cingulate                     | 22          |
| 21             | Insula                                | 23          |
| 22             | Entorhinal                            | 24          |
| 23             | Parahippocampal                       | 25          |
| 24             | Fusiform                              | 26          |
| 25             | Temporal Pole                         | 27          |
| 26             | Inferior Temporal                     | 28          |
| 27             | Middle Temporal                       | 29          |
| 28             | Superior Temporal                     | 30          |
| 29             | Banks of the Superior Temporal Sulcus | 31          |
| 30             | Transverse Temporal                   | 32          |
| 31             | Lingual                               | 33          |
| 32             | Pericalcarine                         | 34          |
| 33             | Cuneus                                | 35          |
| 34             | Lateral Occipital                     | 36          |

Global Surface Area

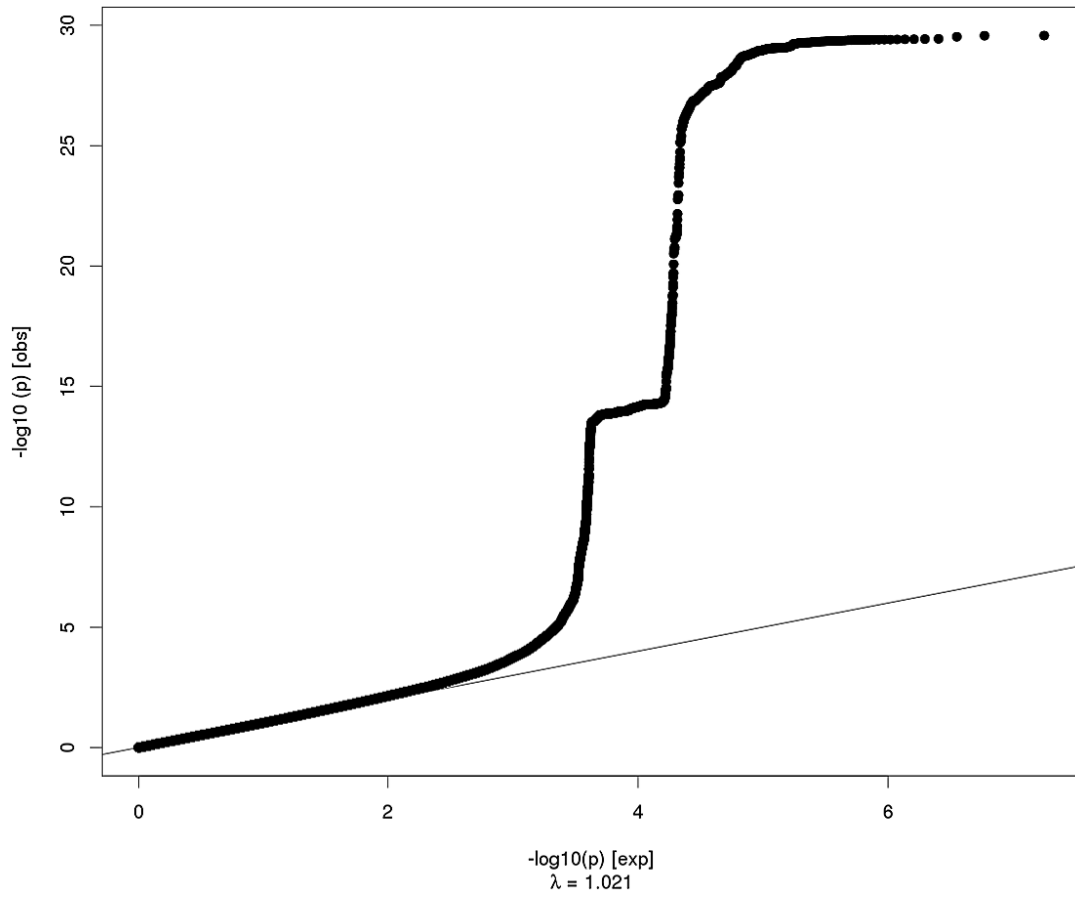

Global Thickness

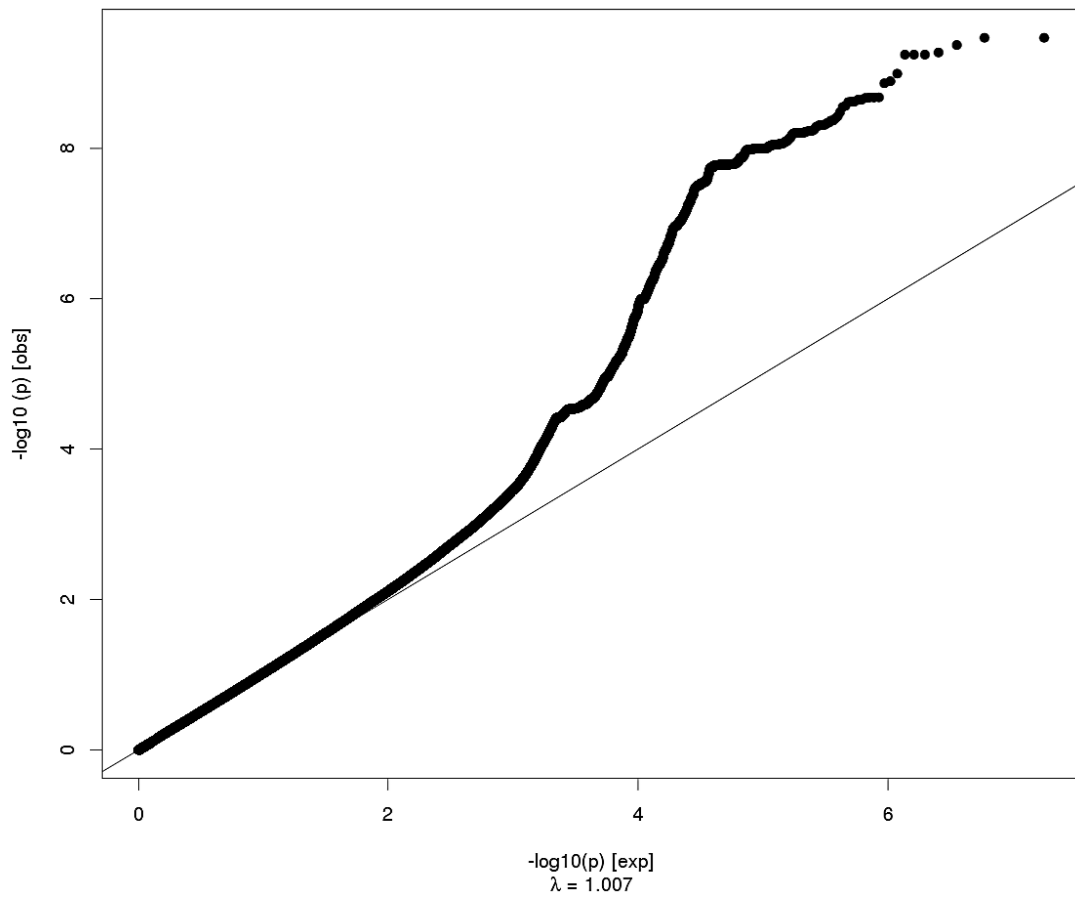

Frontal Pole Surface Area

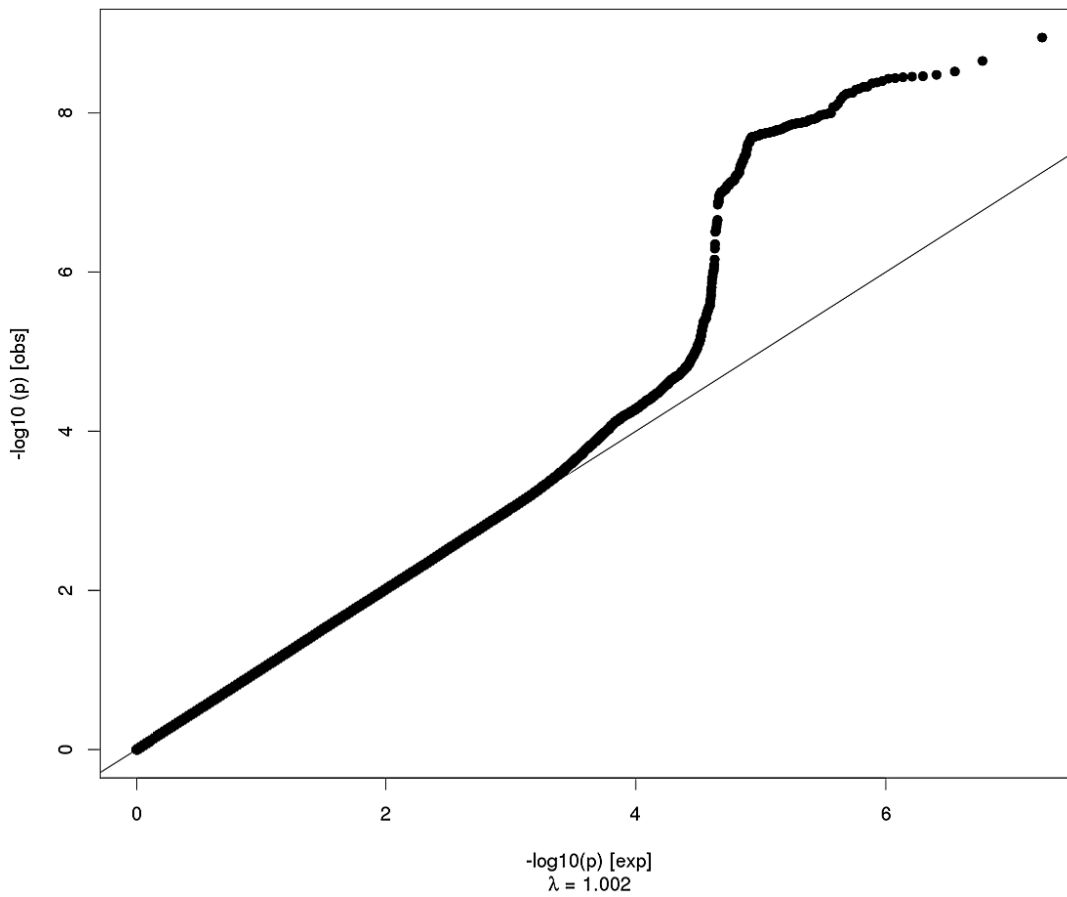

Frontal Pole Thickness

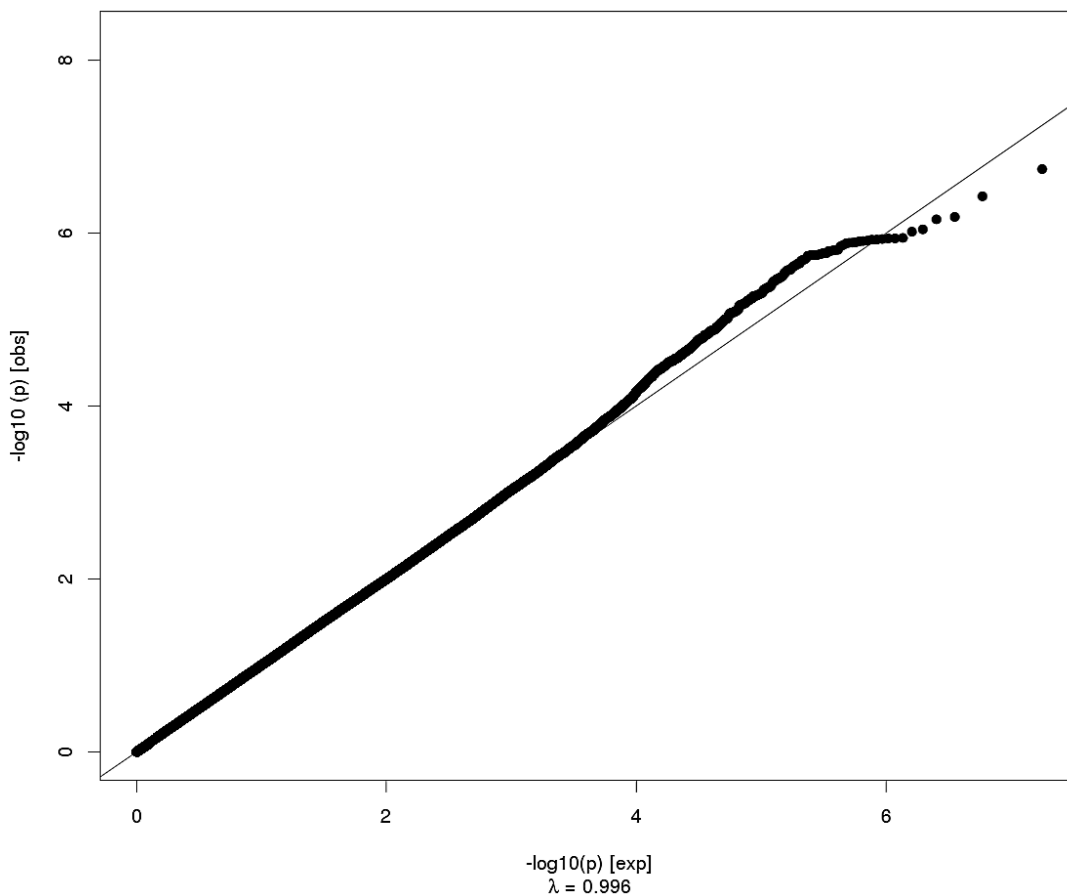

### Medial Orbitofrontal Surface Area

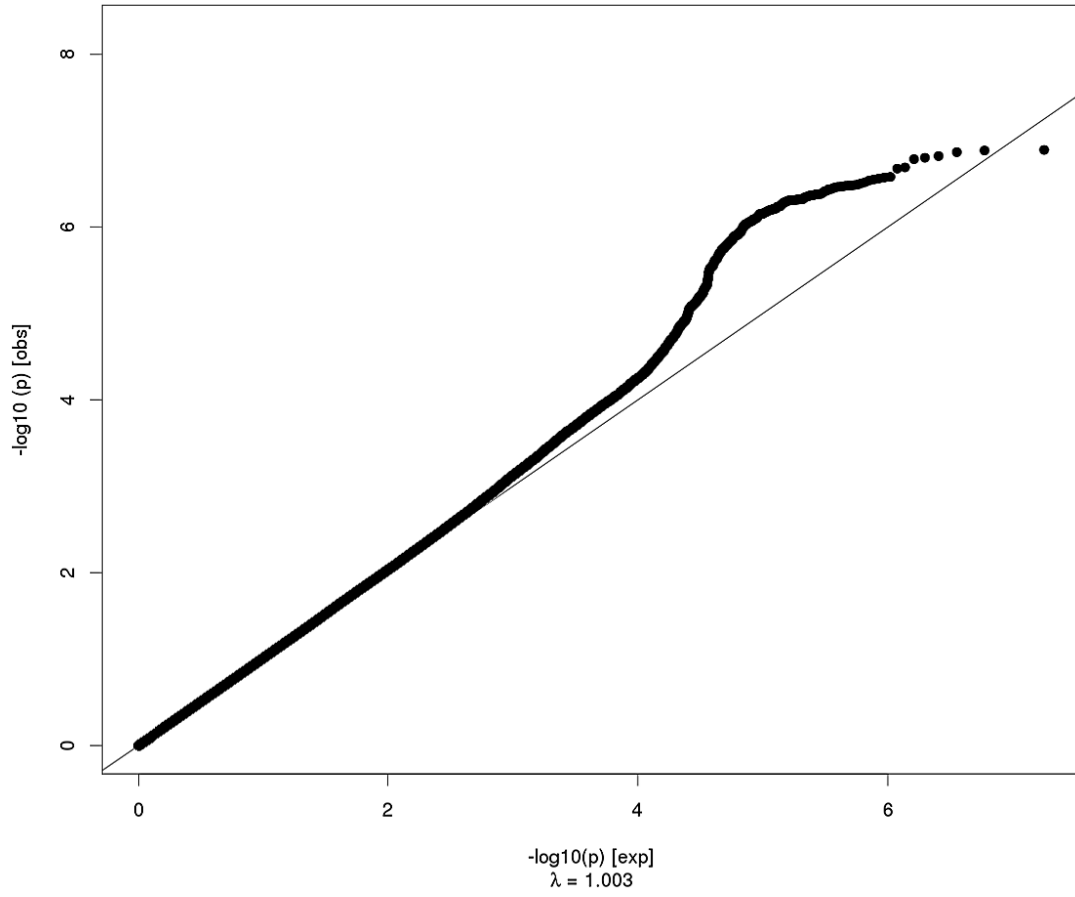

### Medial Orbitofrontal Thickness

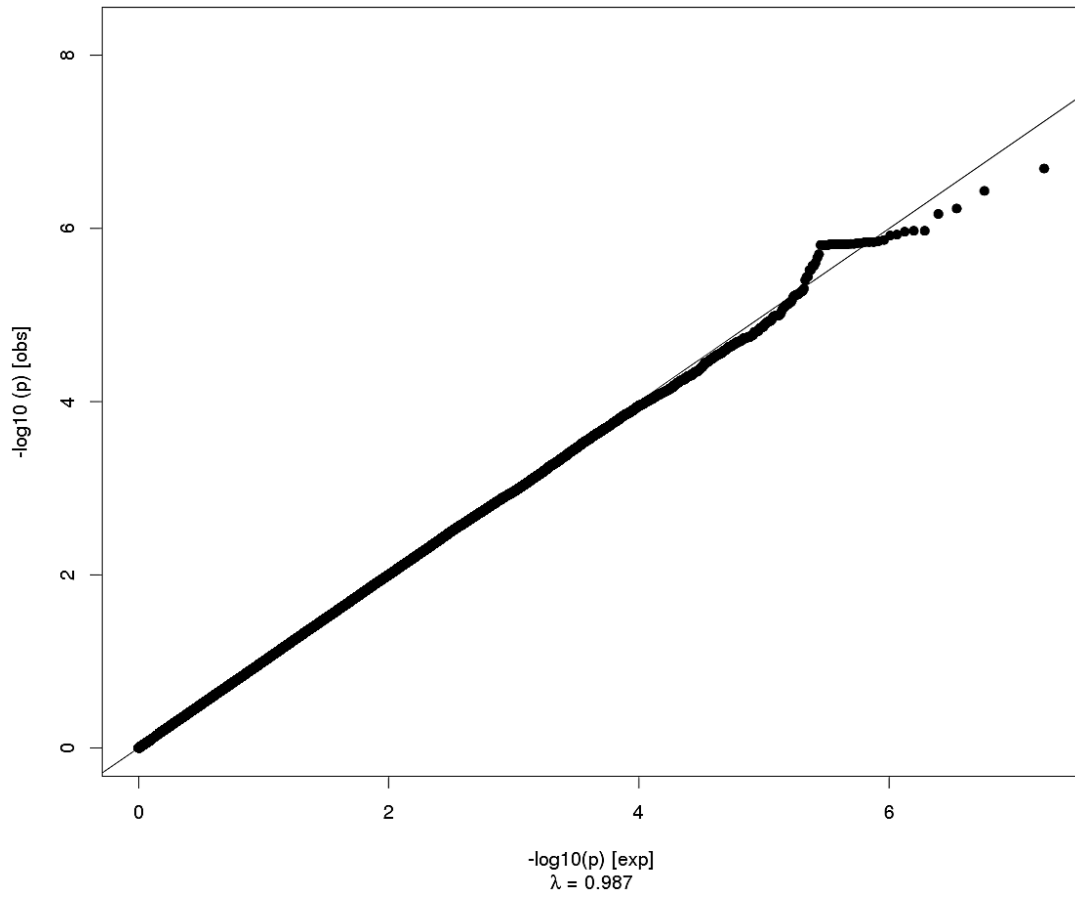

Lateral Orbitofrontal Surface Area

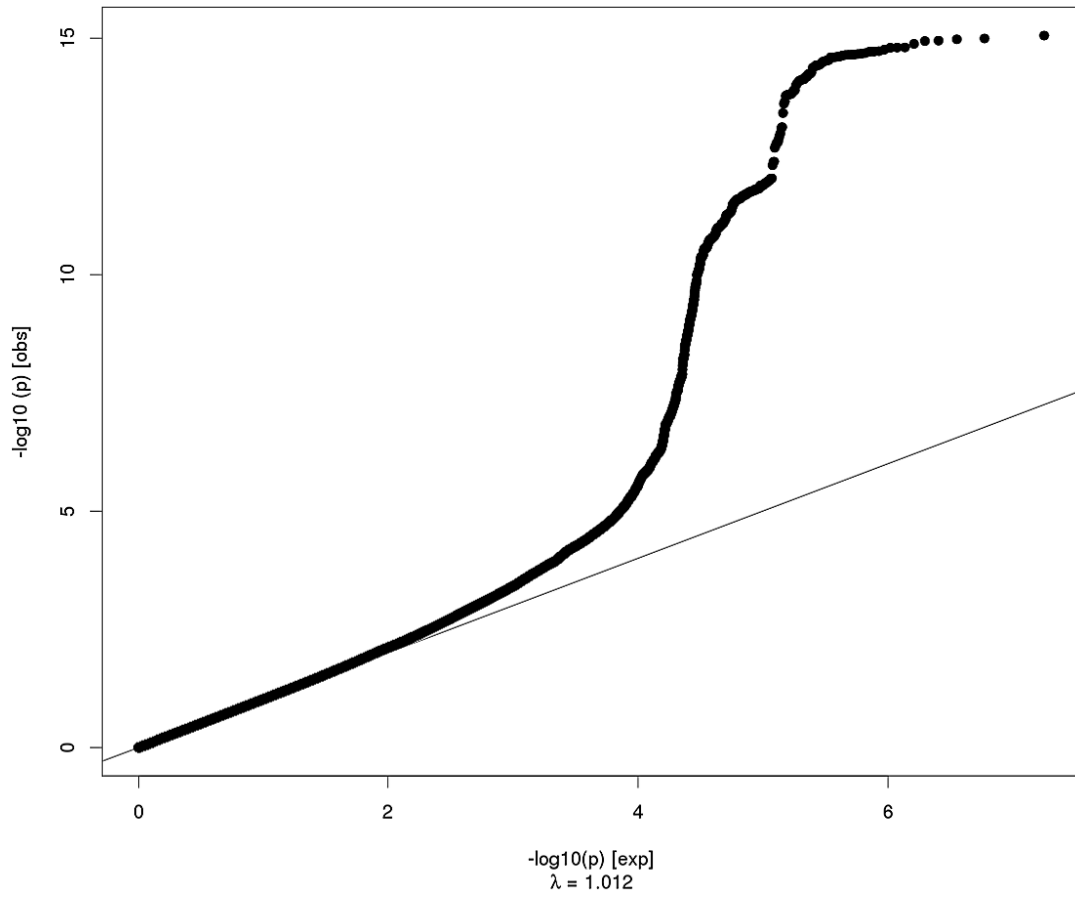

Lateral Orbitofrontal Thickness

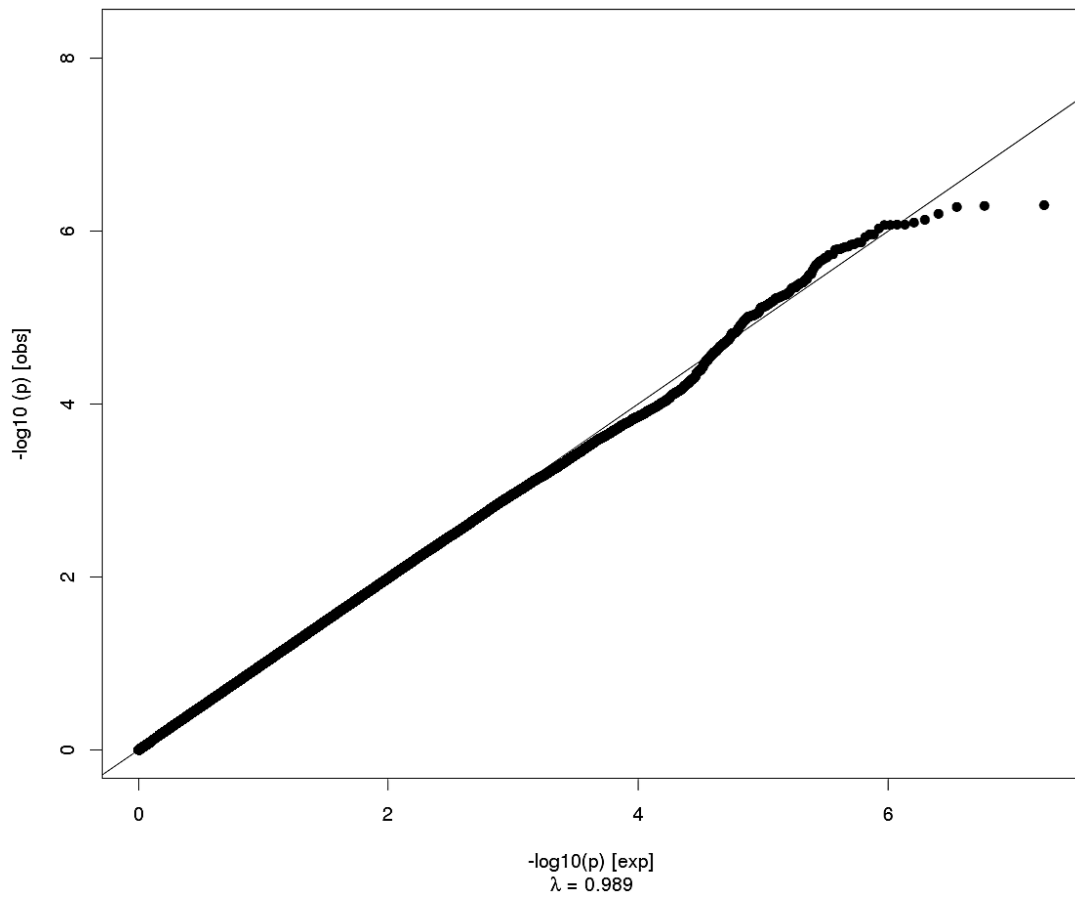

### Rostral Anterior Cingulate Surface Area

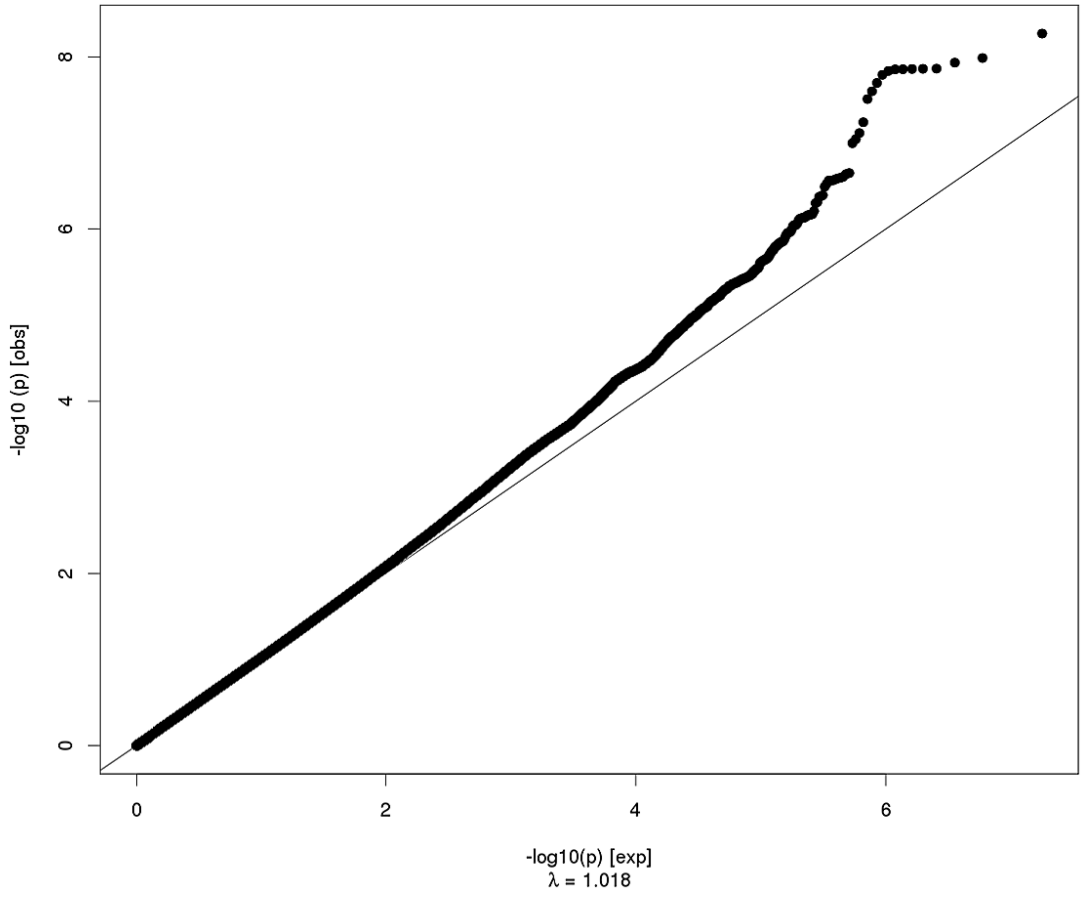

### Rostral Anterior Cingulate Thickness

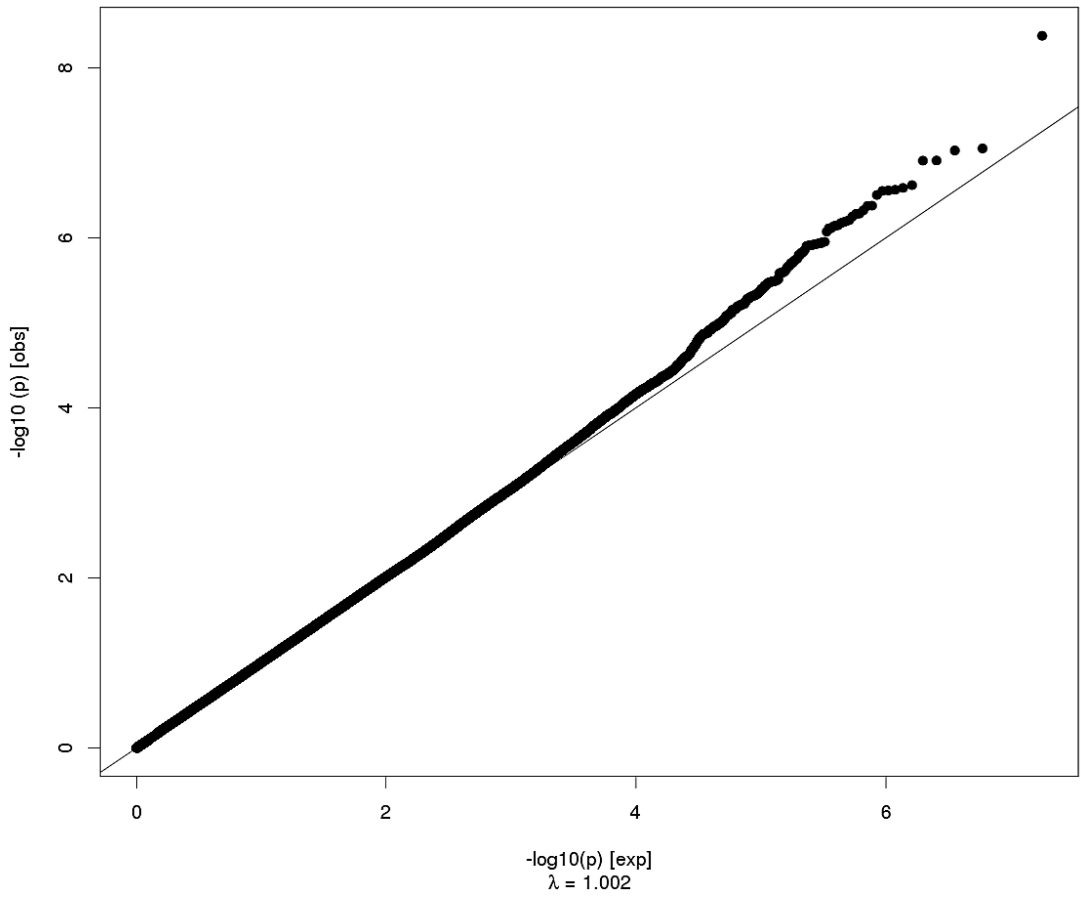

Caudal Anterior Cingulate Surface Area

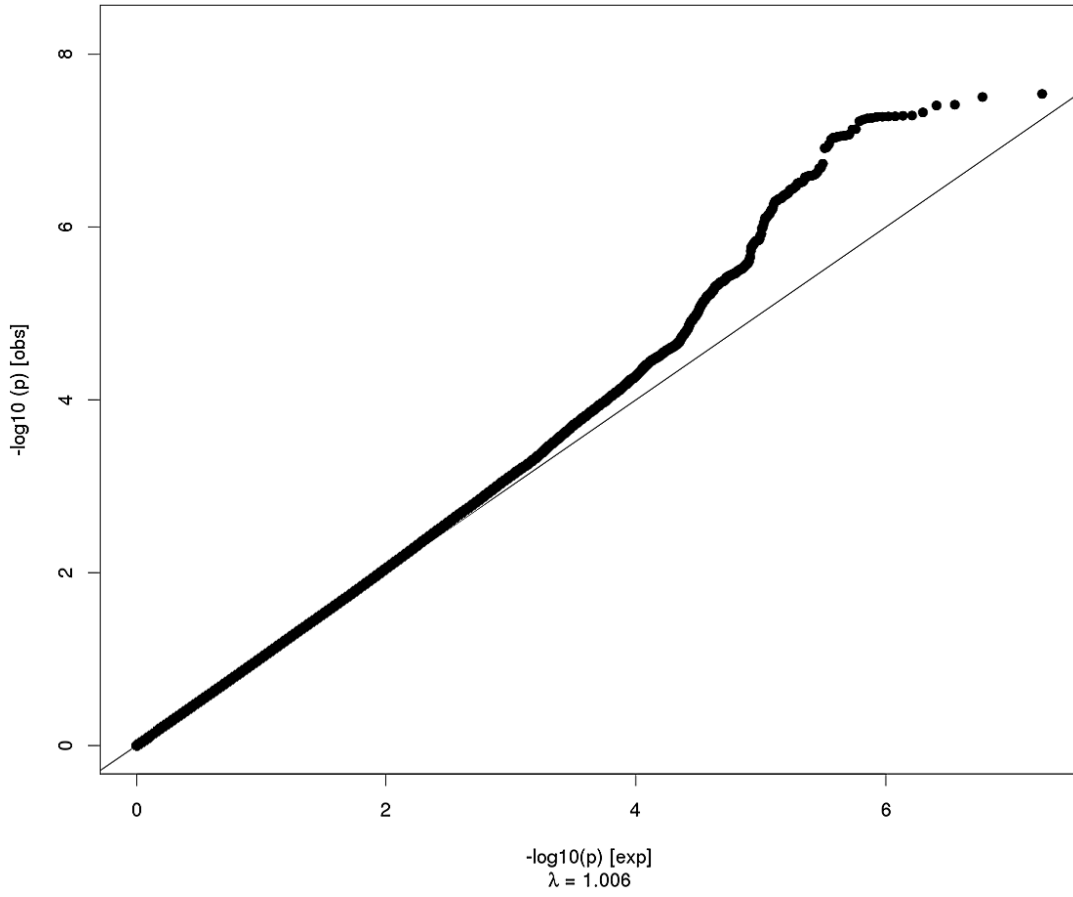

Caudal Anterior Cingulate Thickness

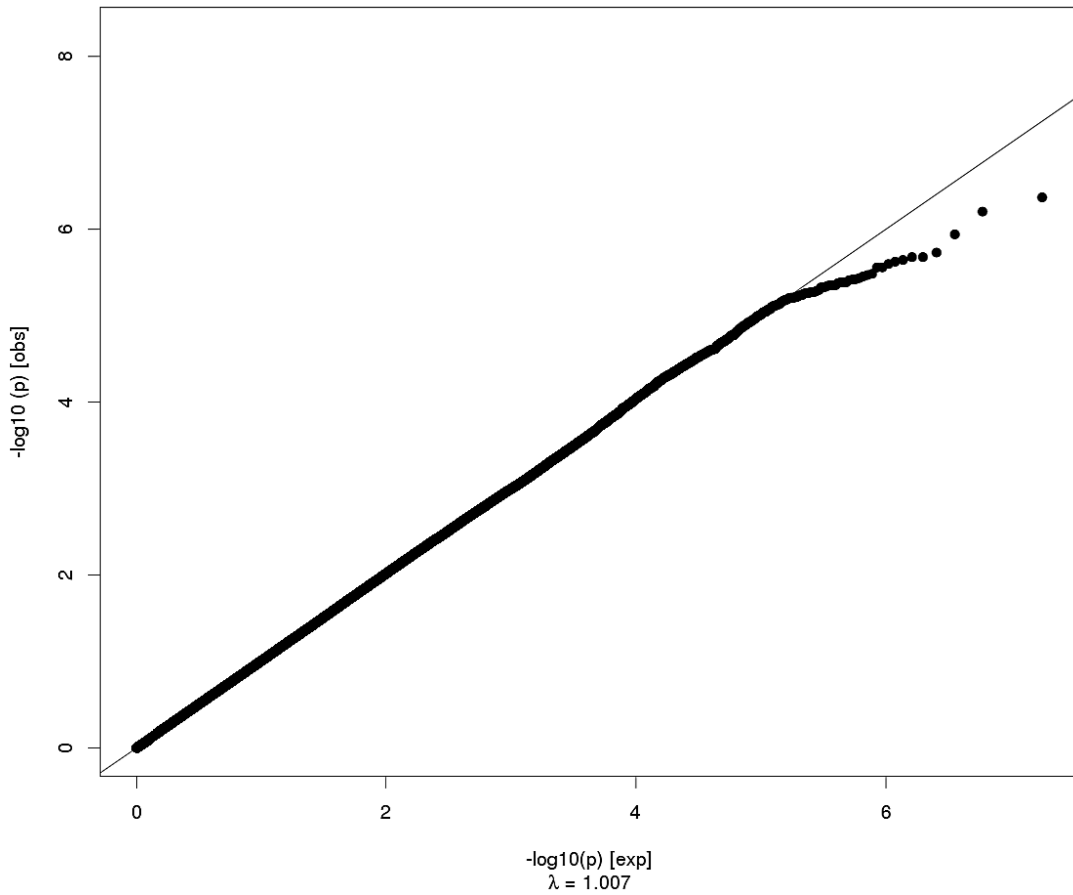

Superior Frontal Surface Area

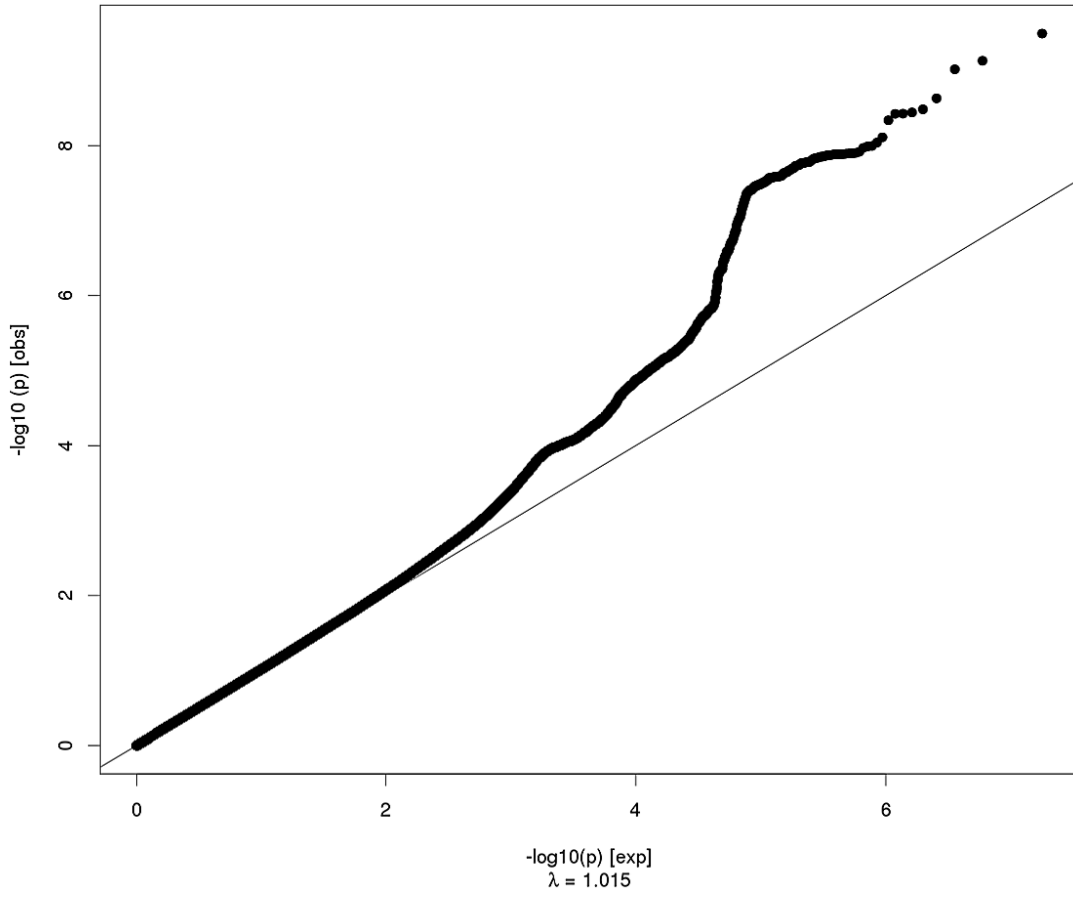

Superior Frontal Thickness

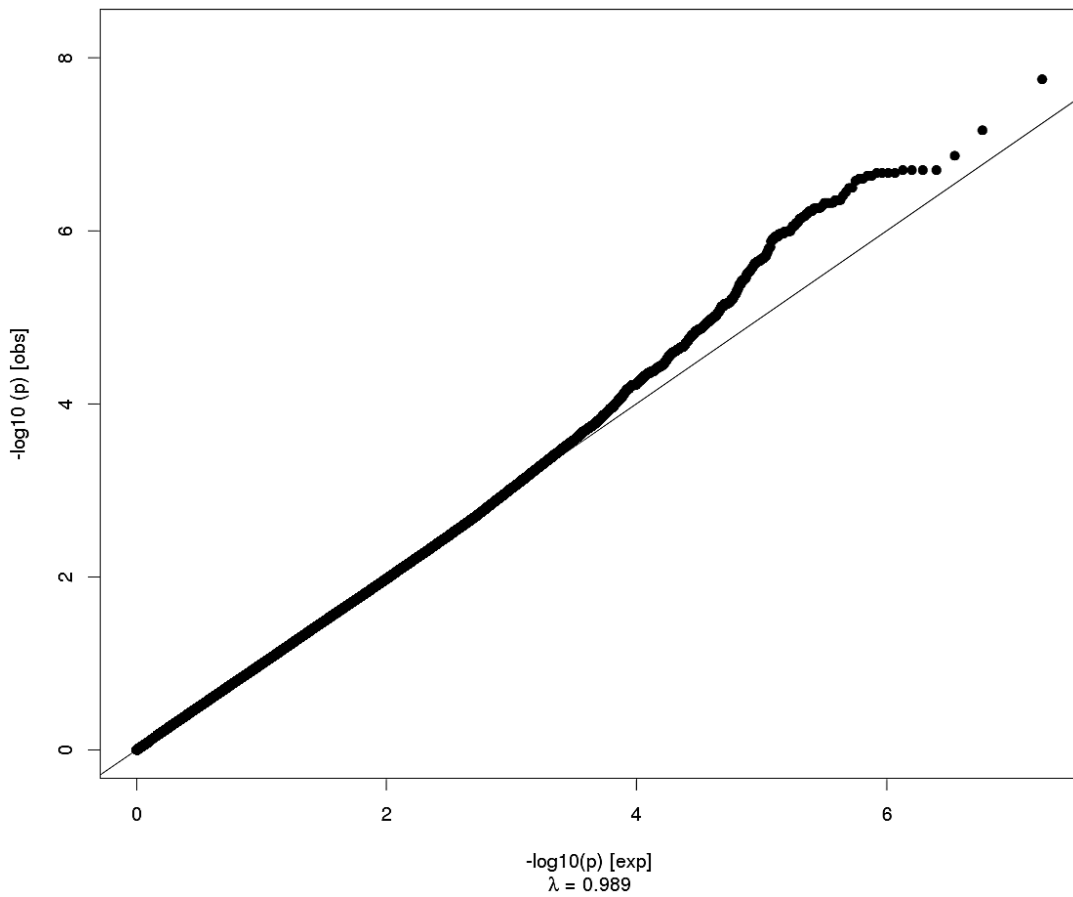



Rostral Middle Frontal Surface Area

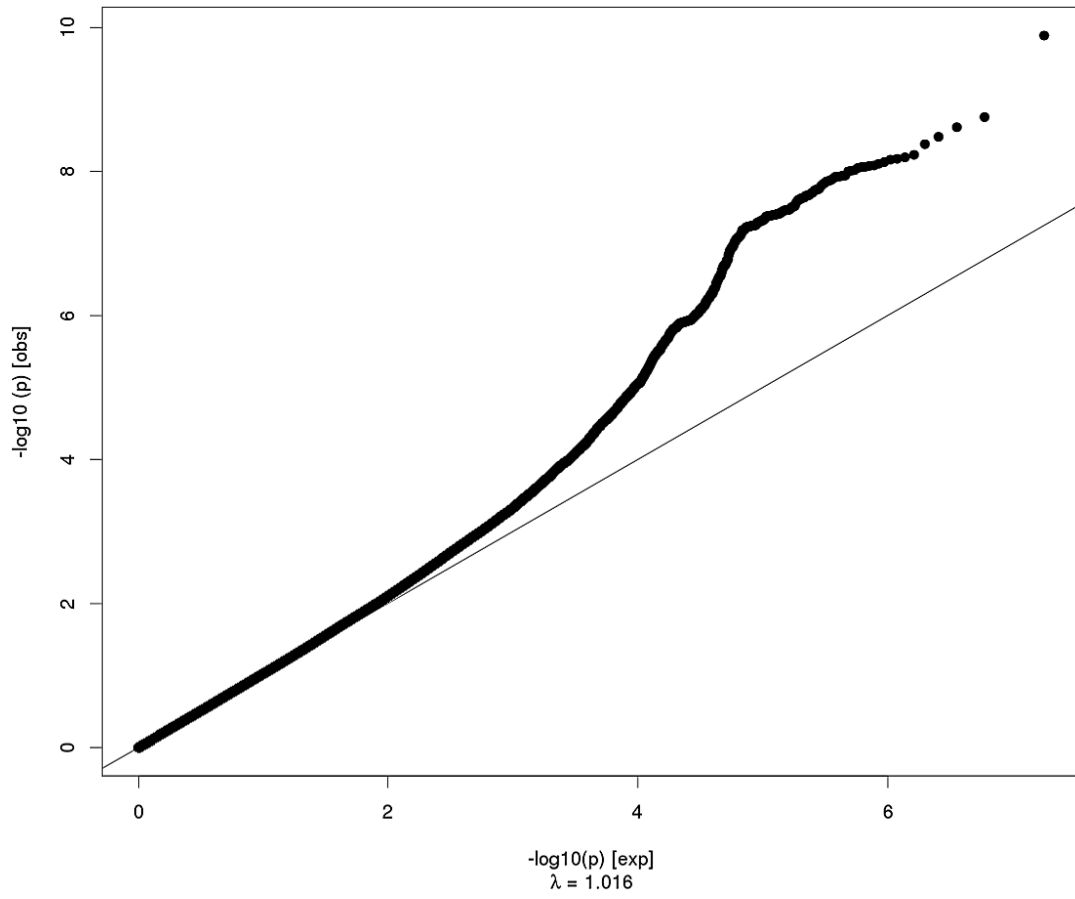

Rostral Middle Frontal Thickness

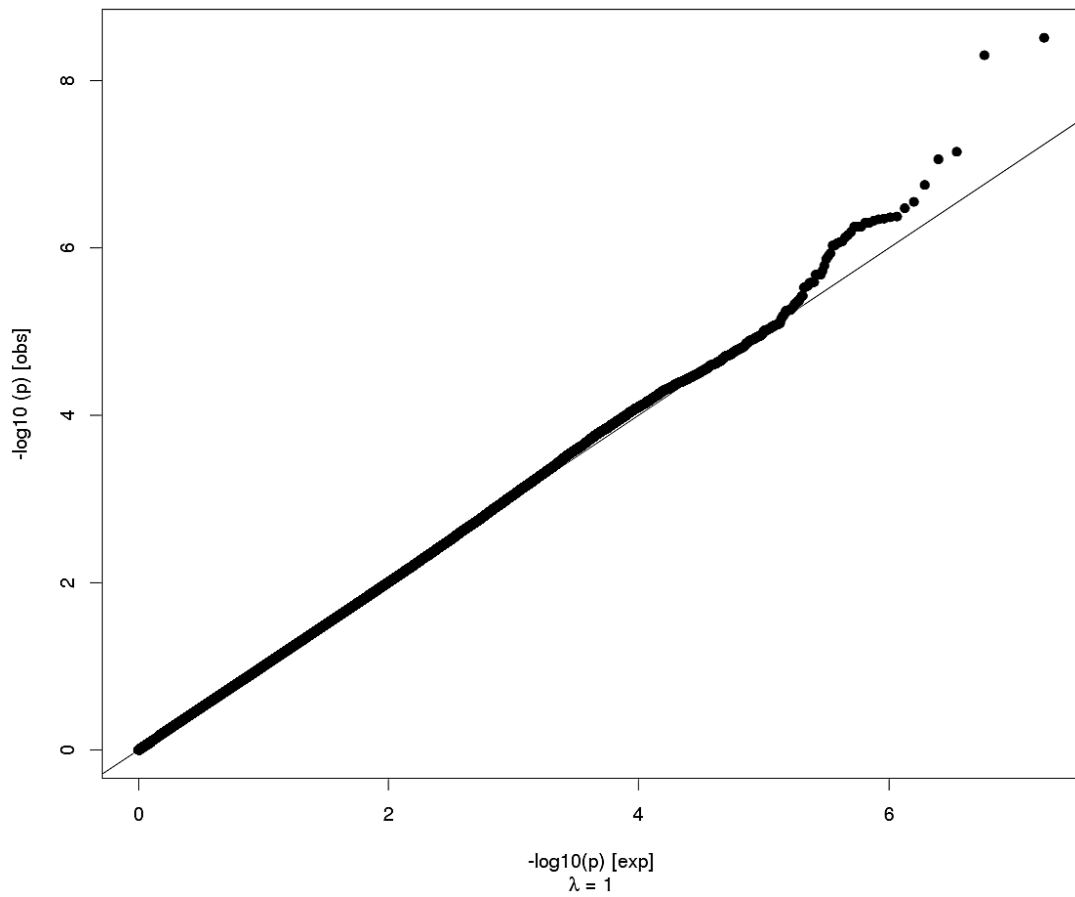

Pars Orbitalis Surface Area

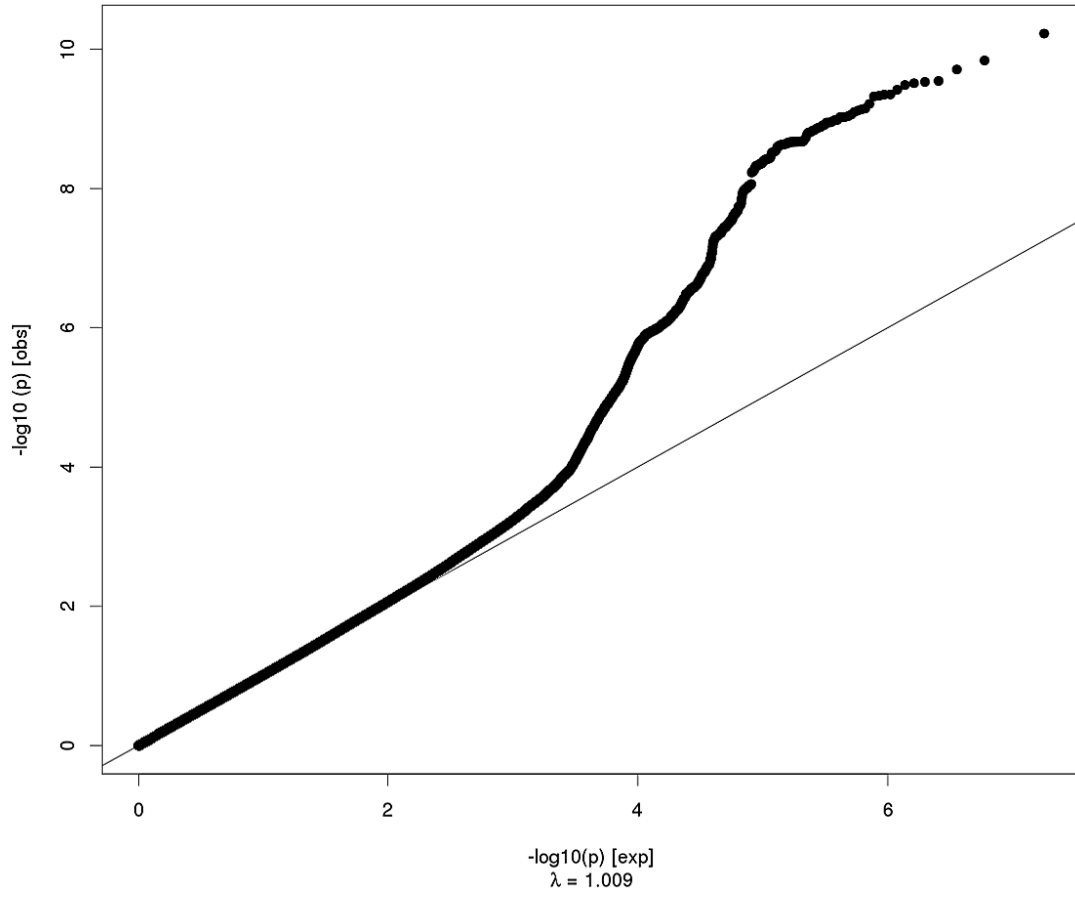

Pars Orbitalis Thickness

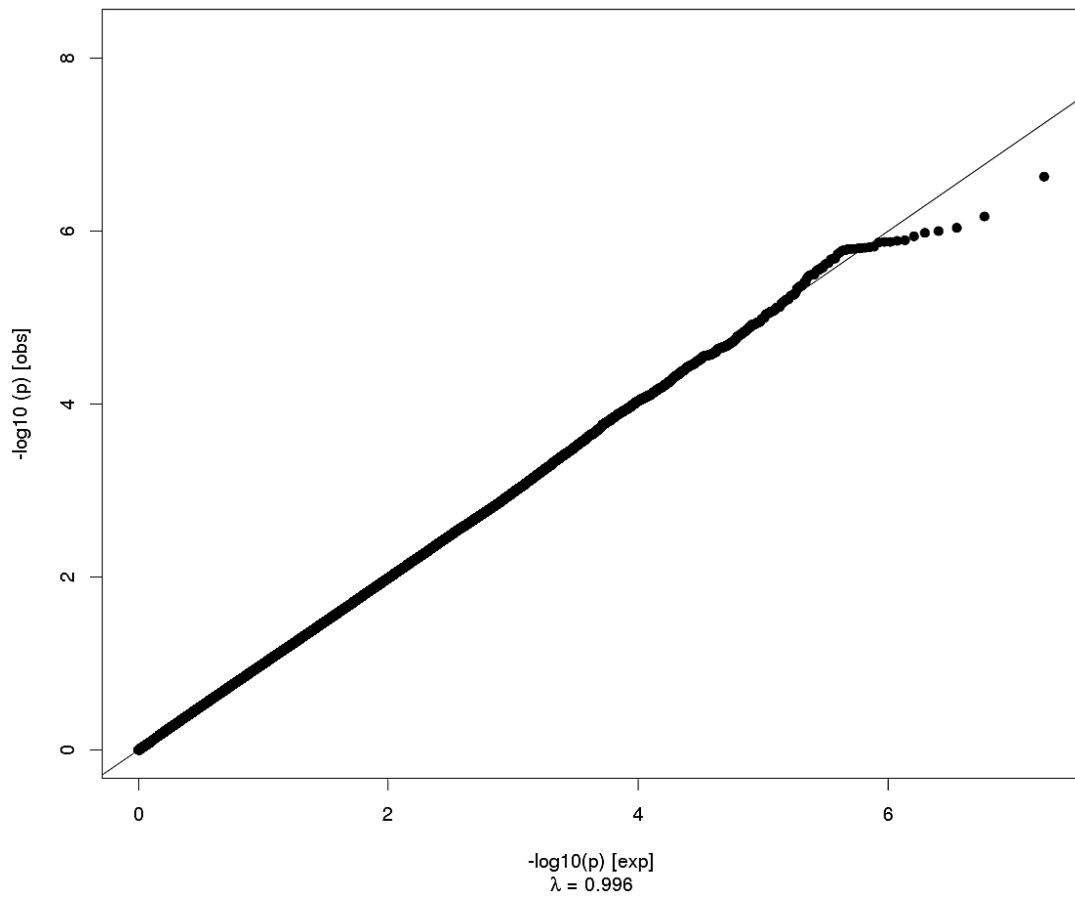

Pars Triangularis Surface Area

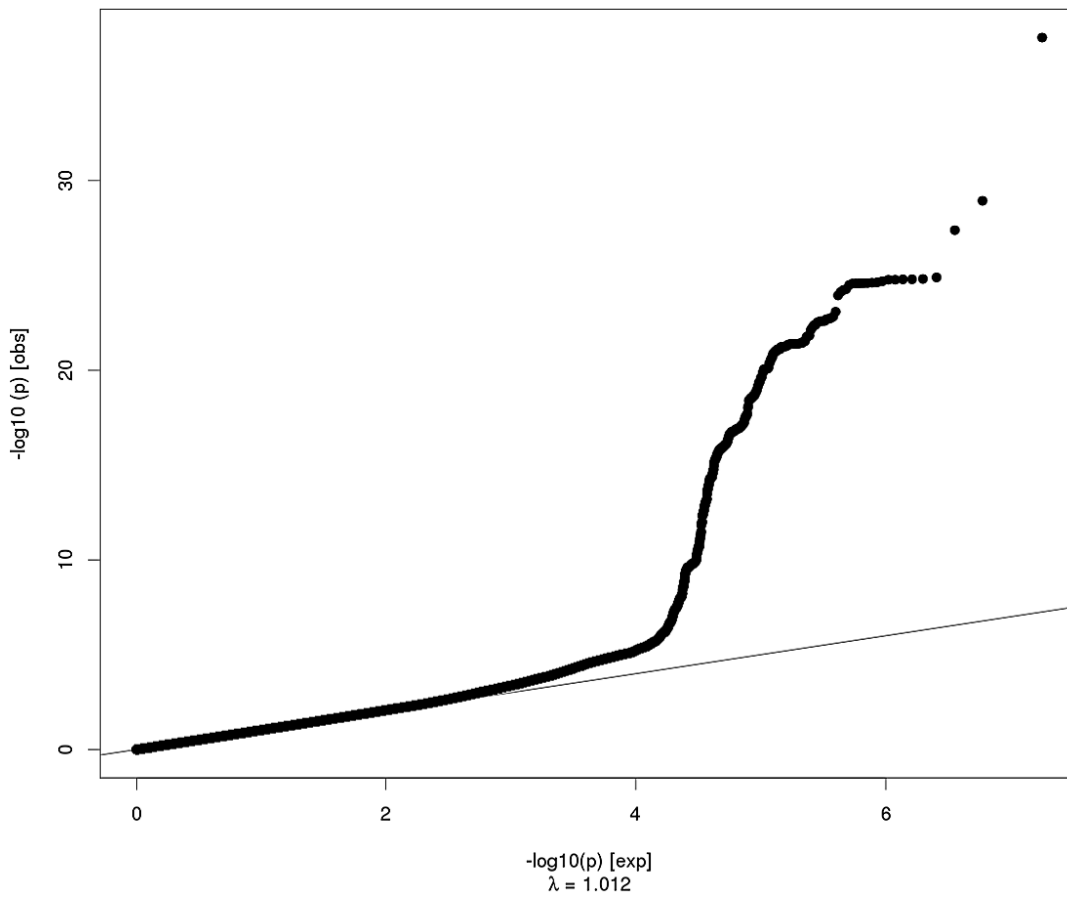

Pars Triangularis Thickness

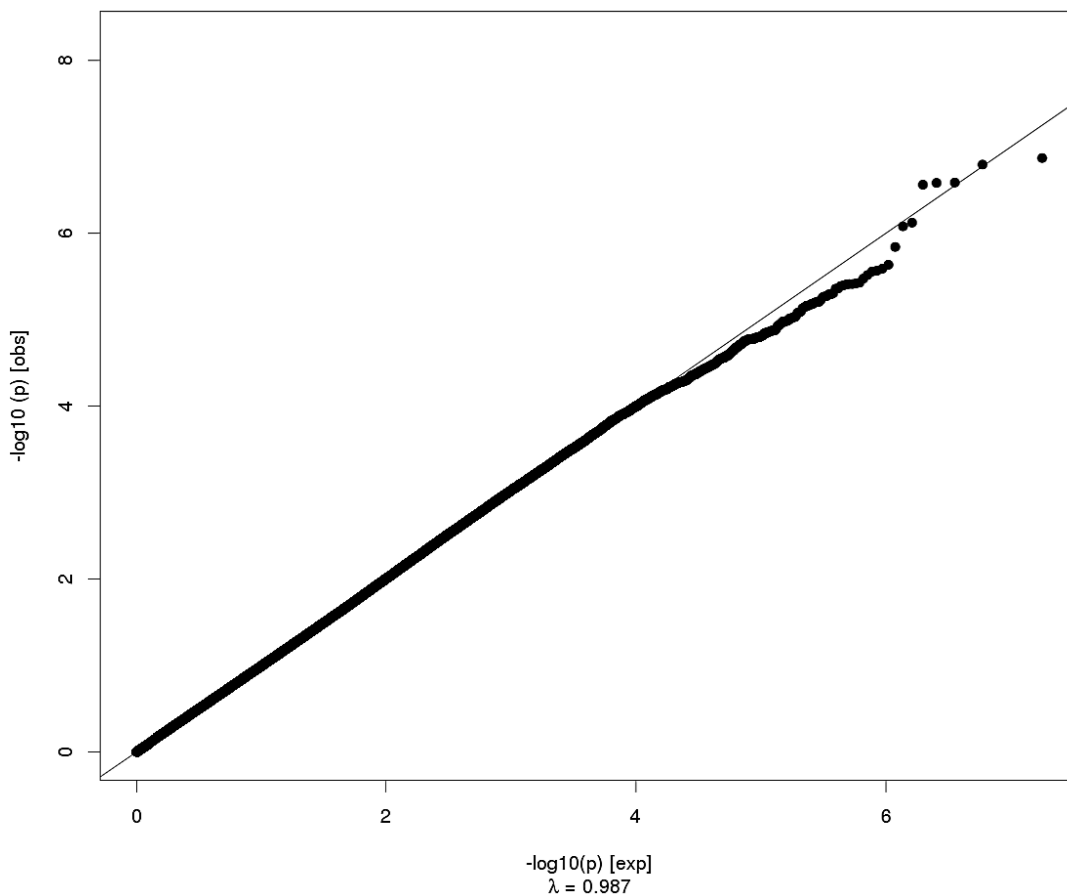

### Pars Opercularis Surface Area

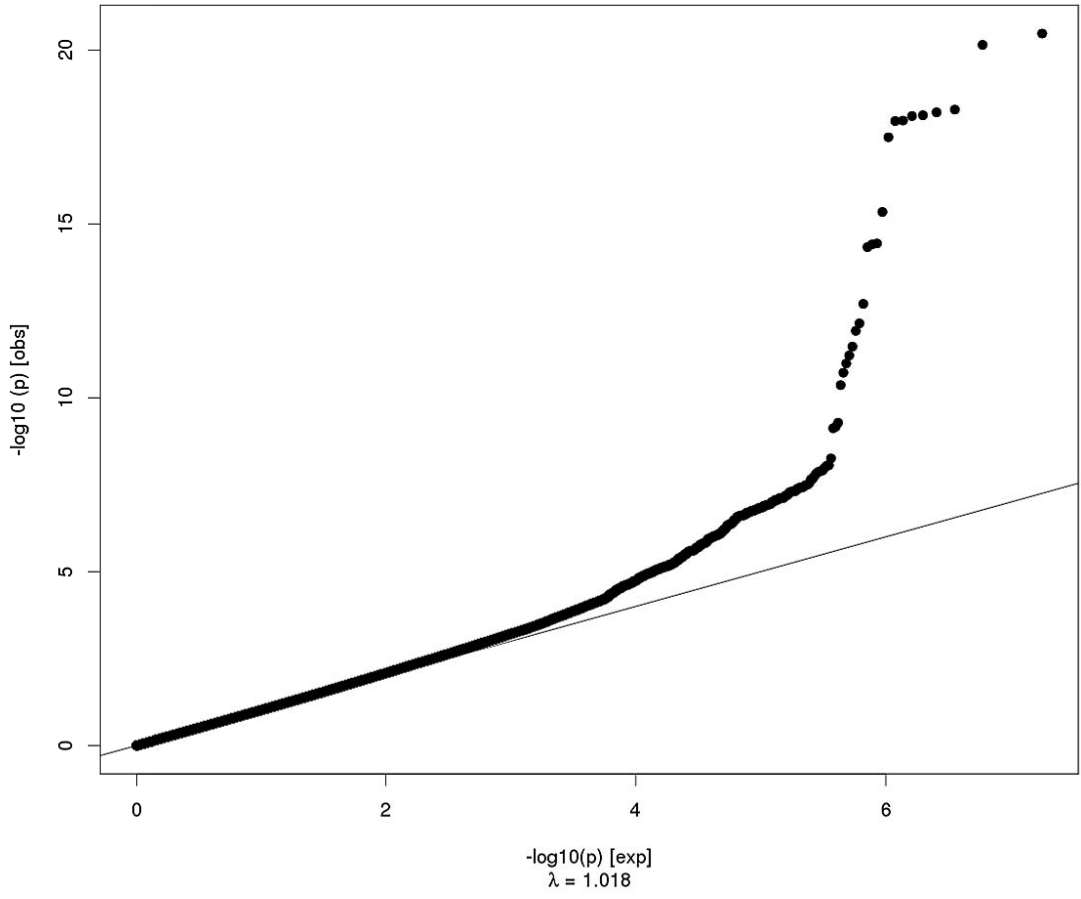

### Pars Opercularis Thickness

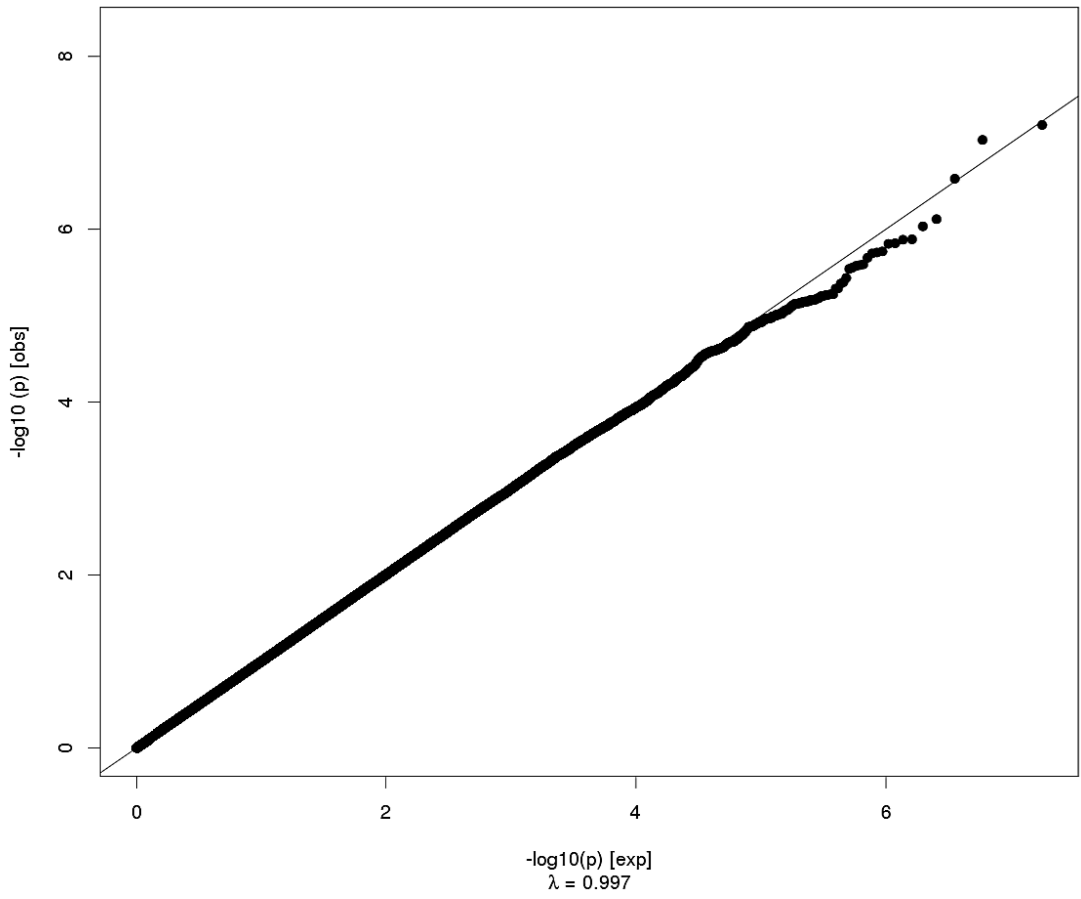

Caudal Middle Frontal Surface Area

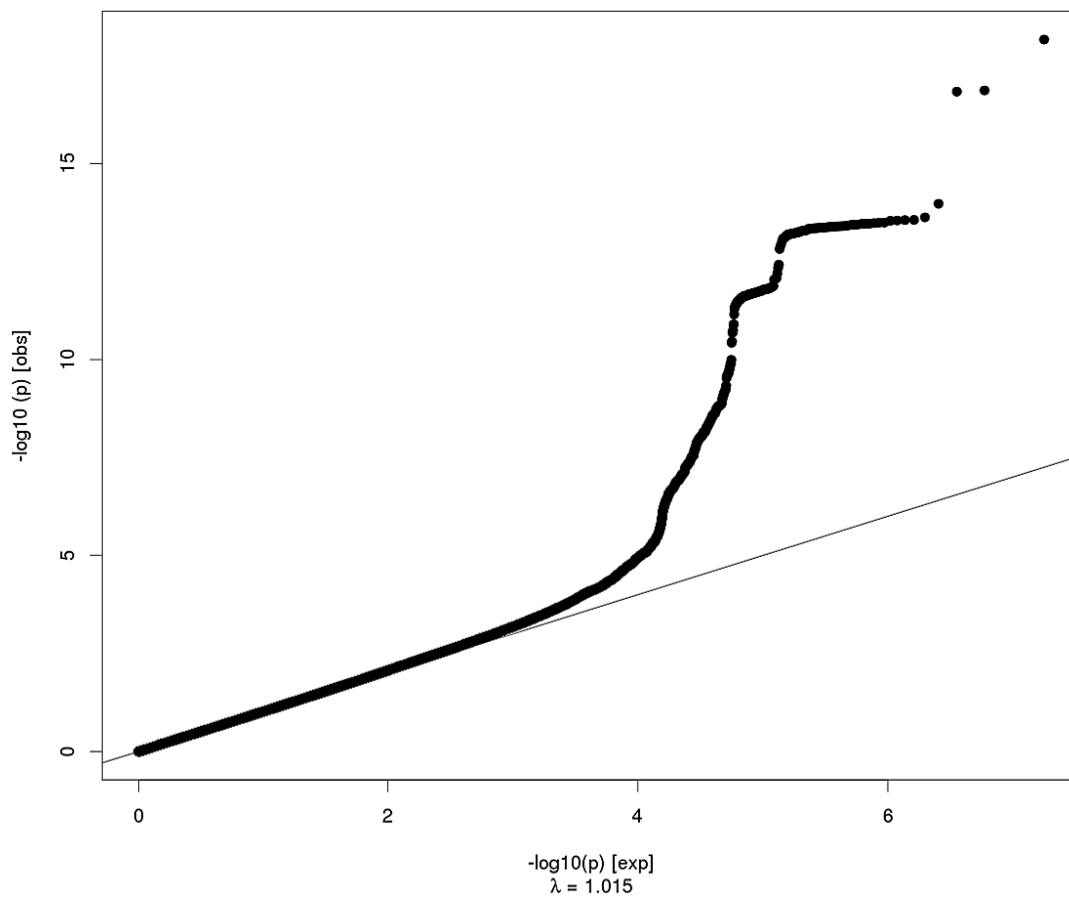

Caudal Middle Frontal Thickness

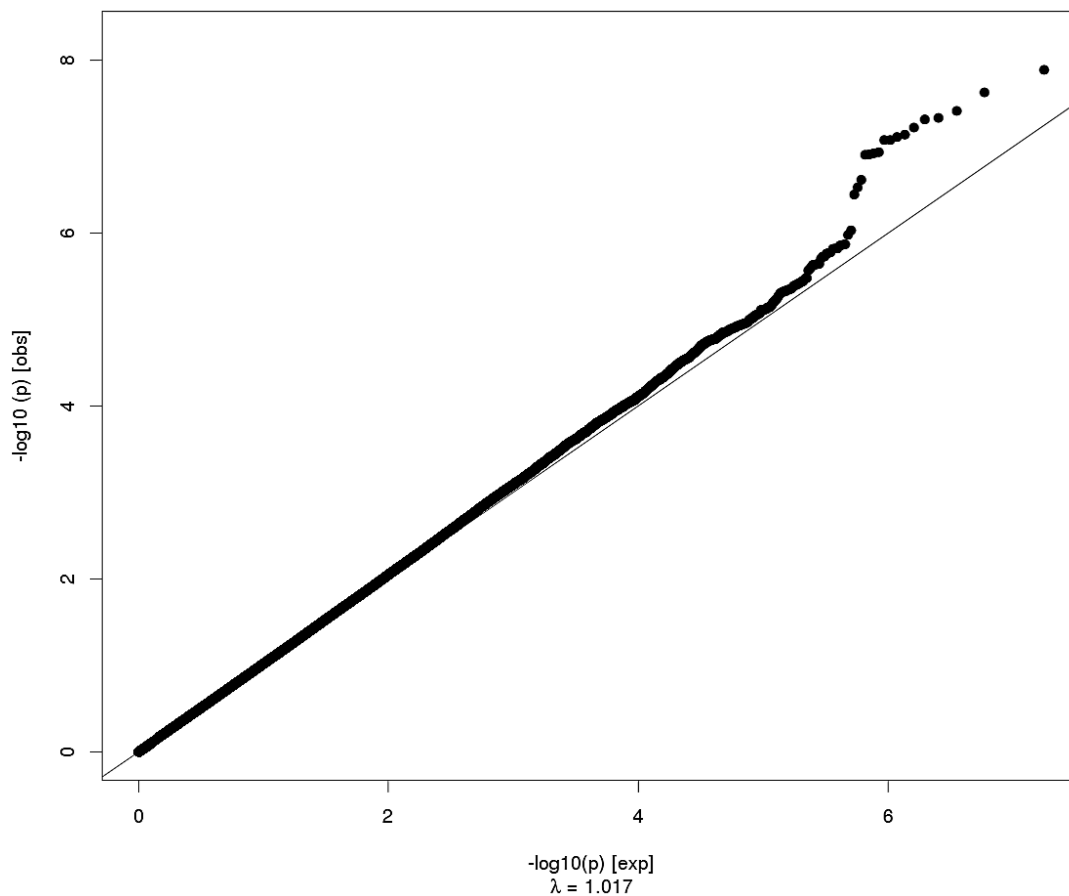

Paracentral Surface Area

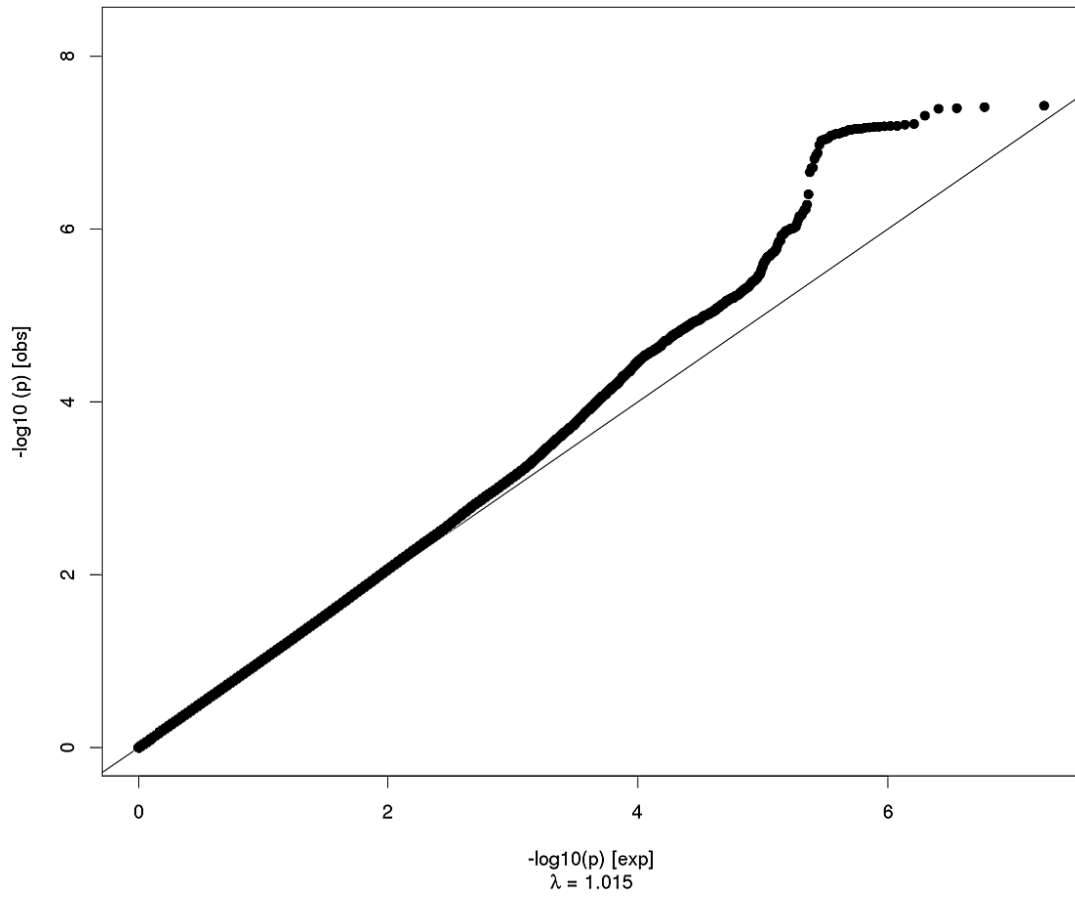

Paracentral Thickness

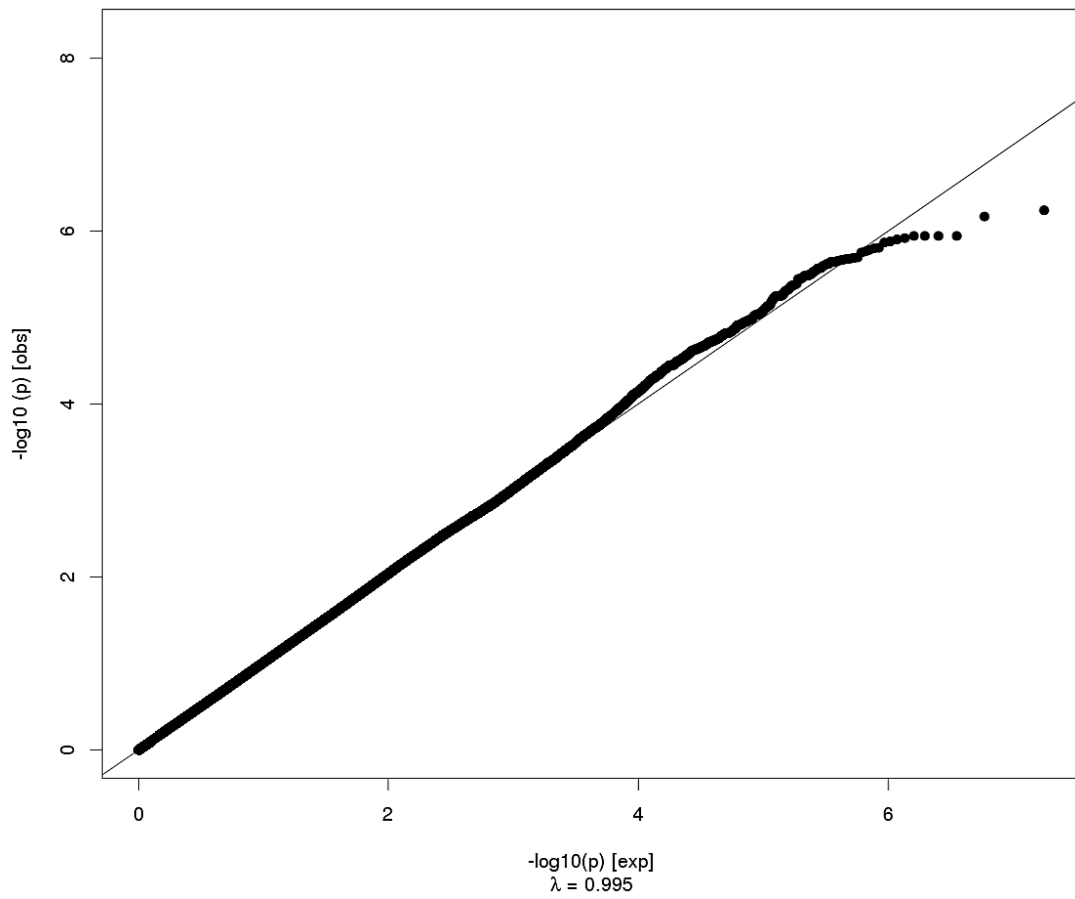

Precentral Surface Area

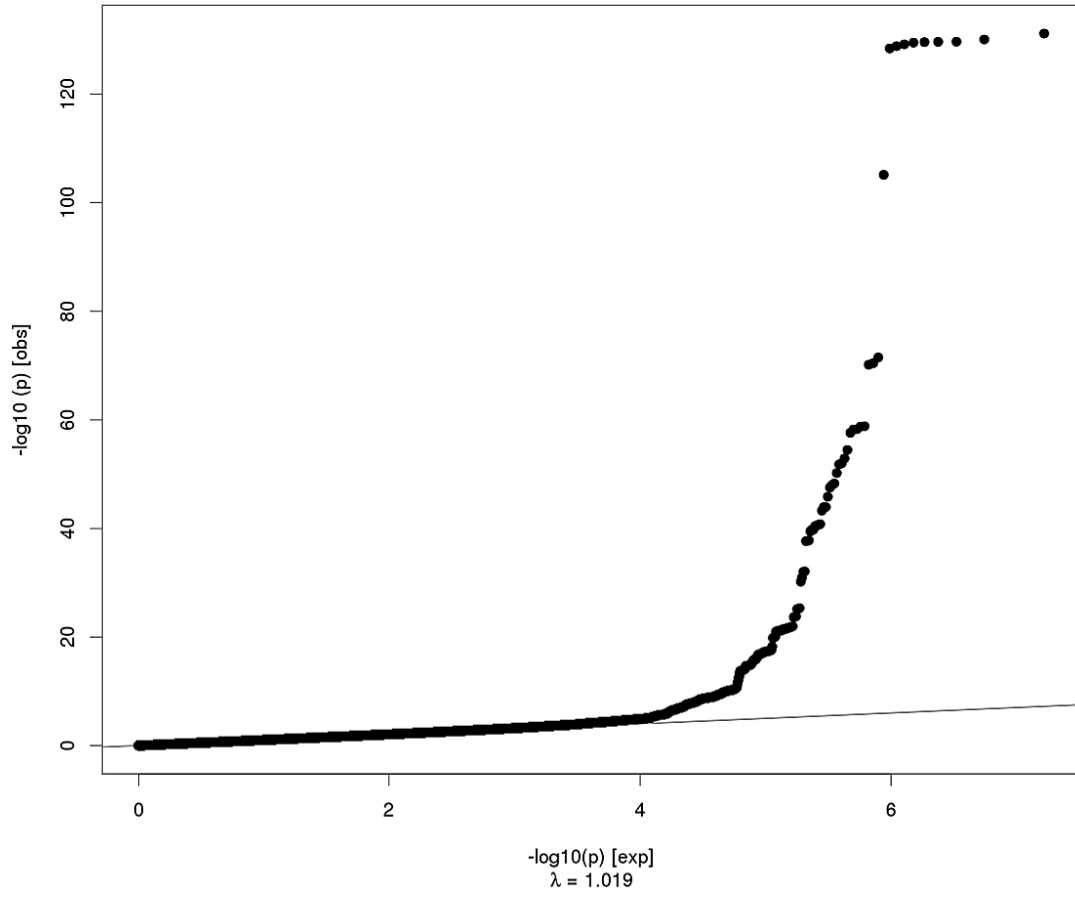

Precentral Thickness

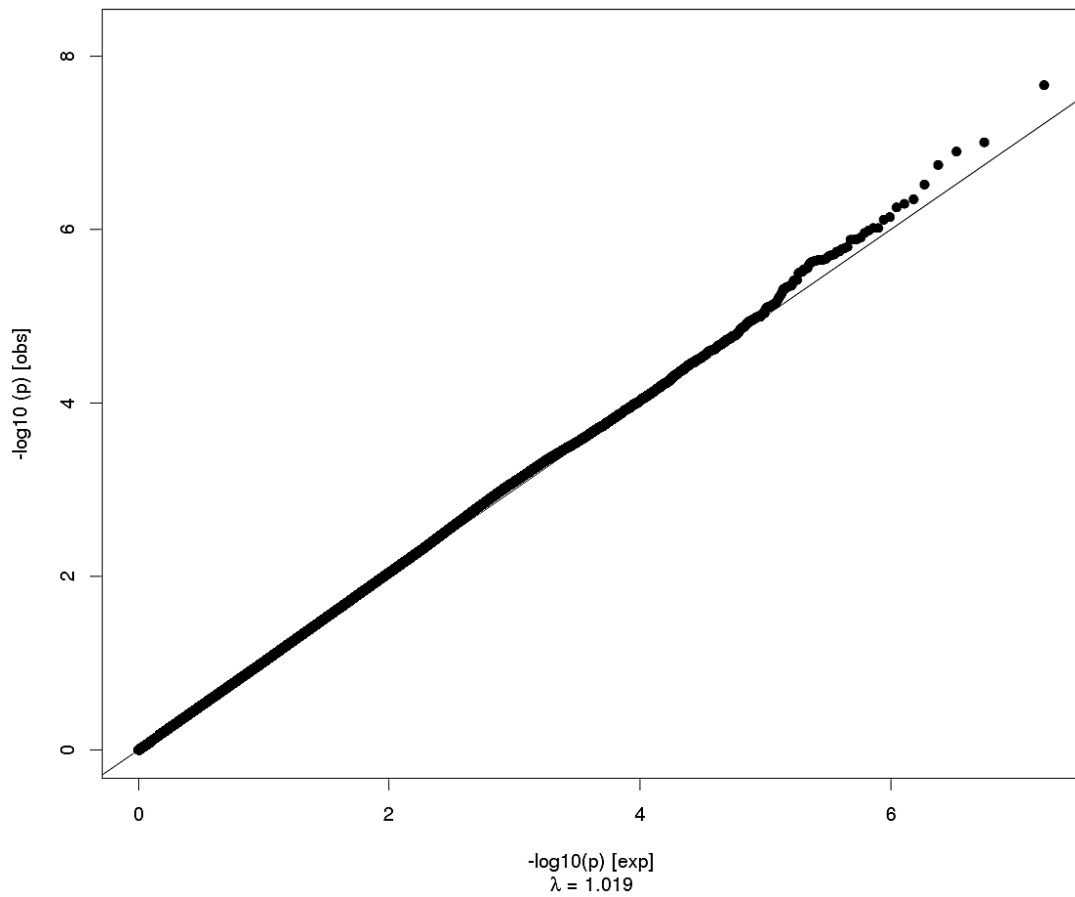

### Postcentral Surface Area

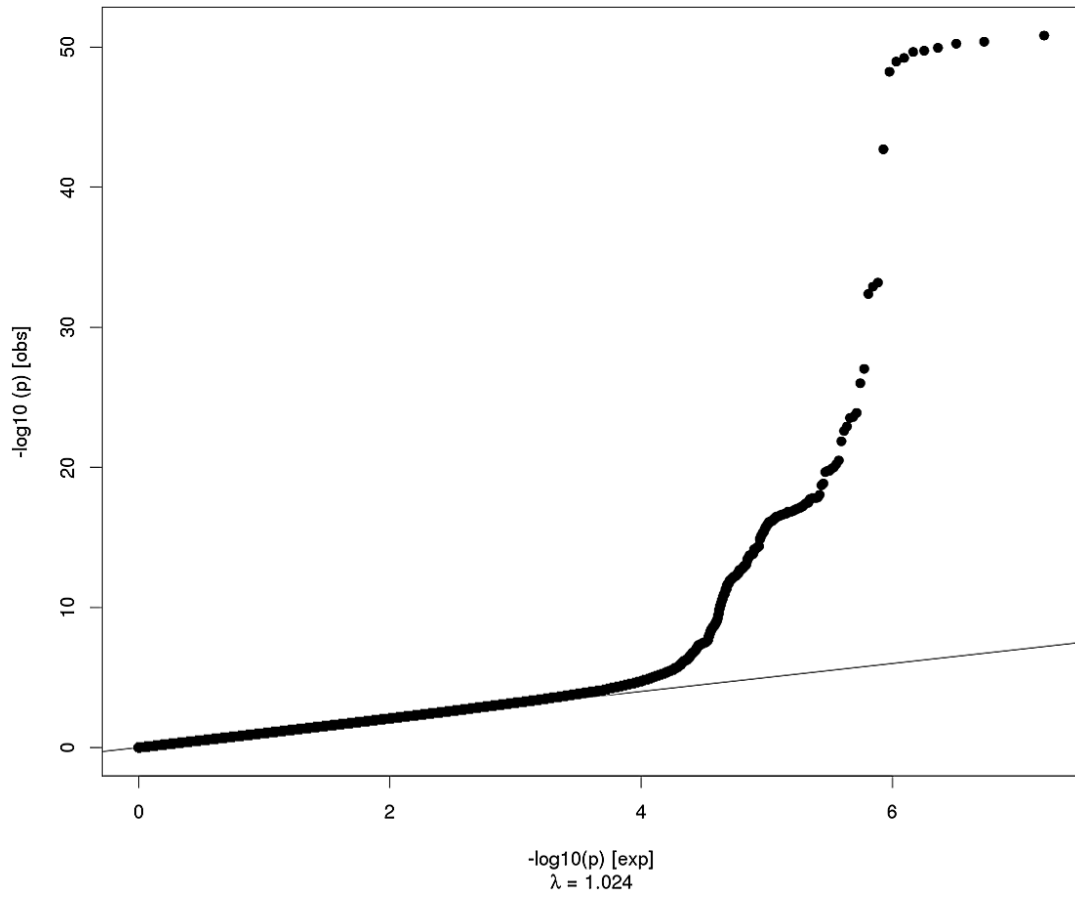

### Postcentral Thickness

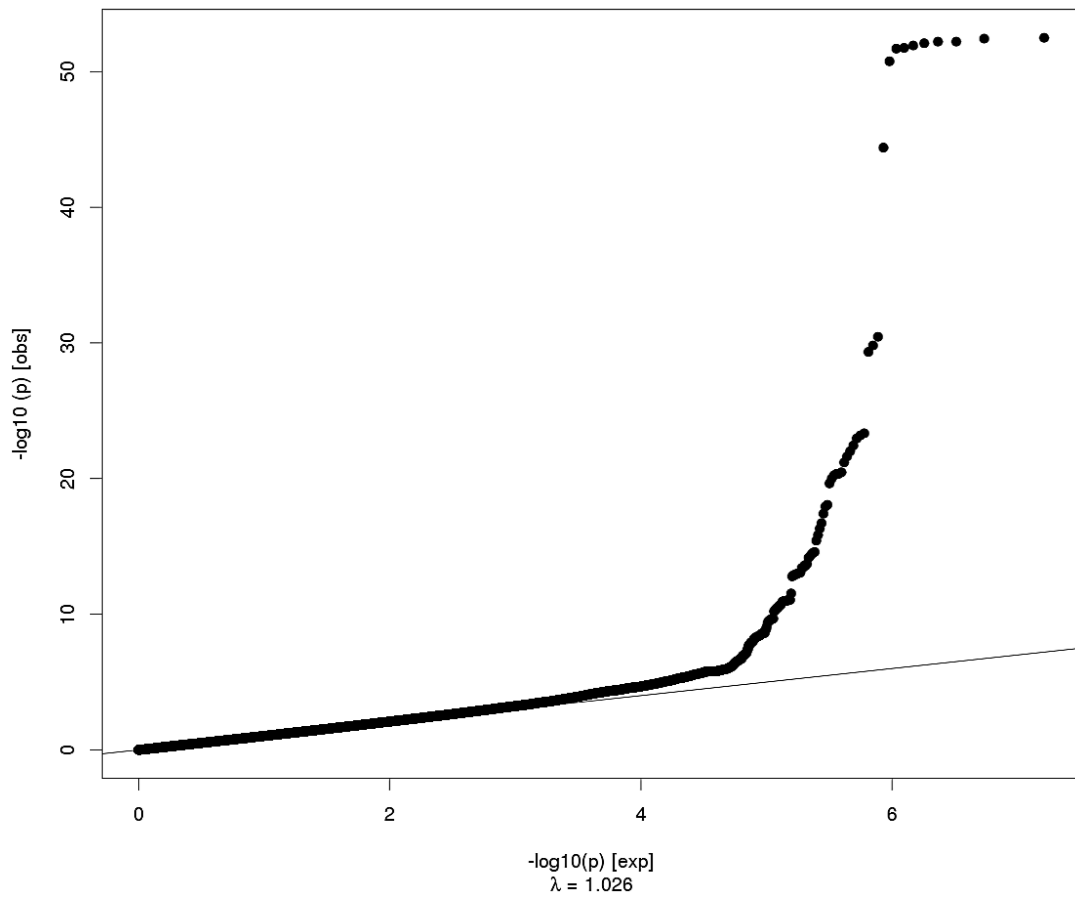



Precuneus Surface Area

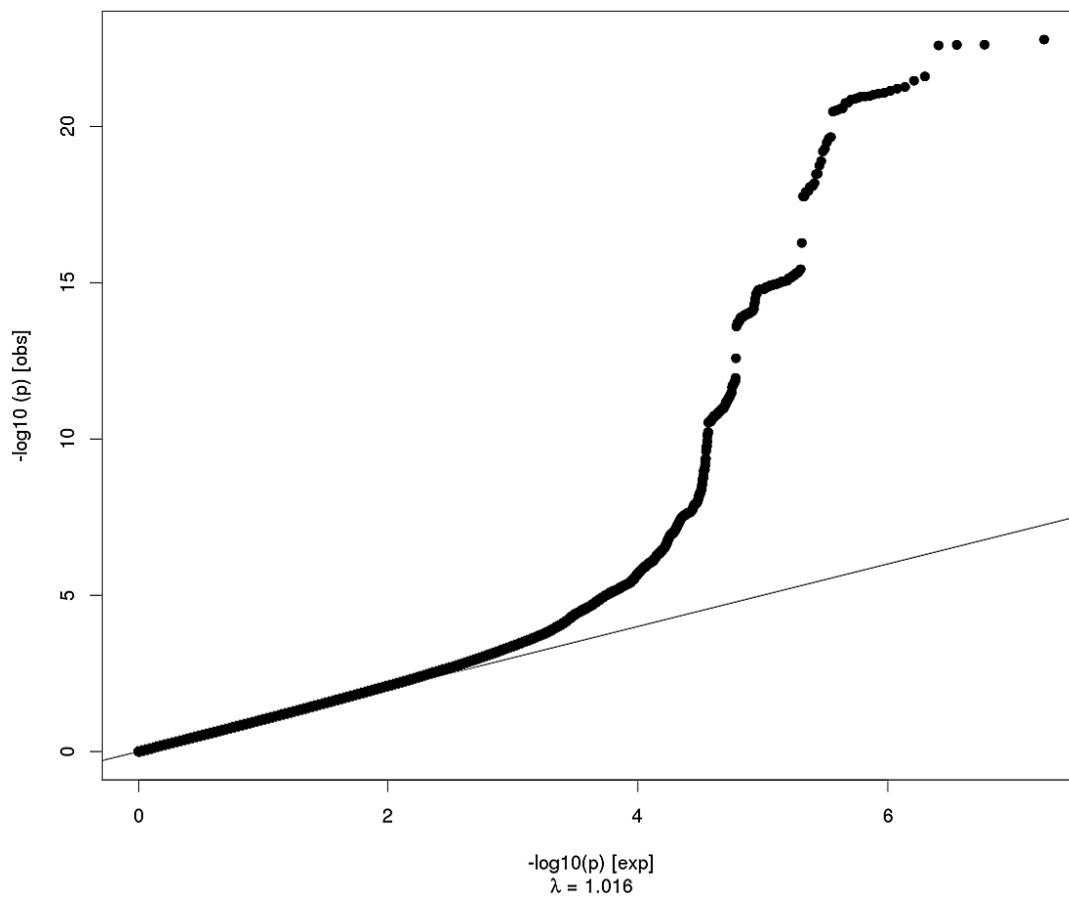

Precuneus Thickness

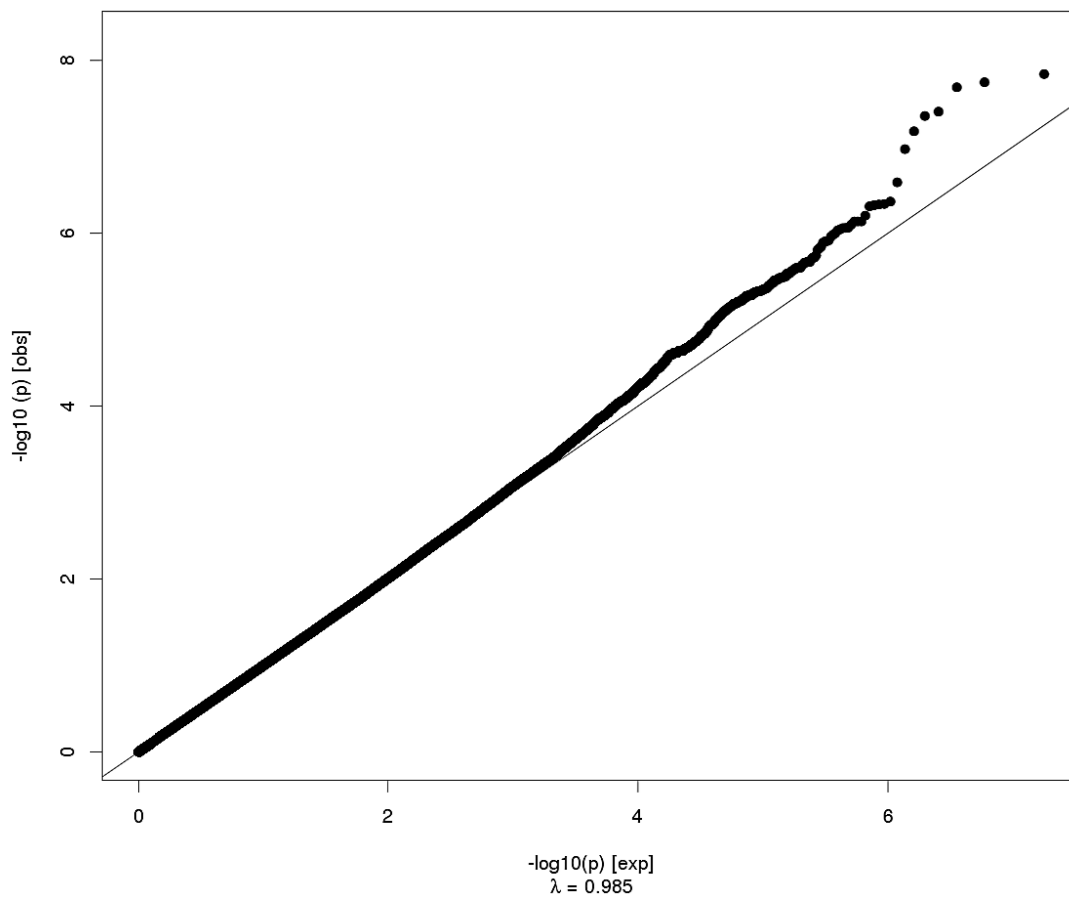

Superior Parietal Surface Area

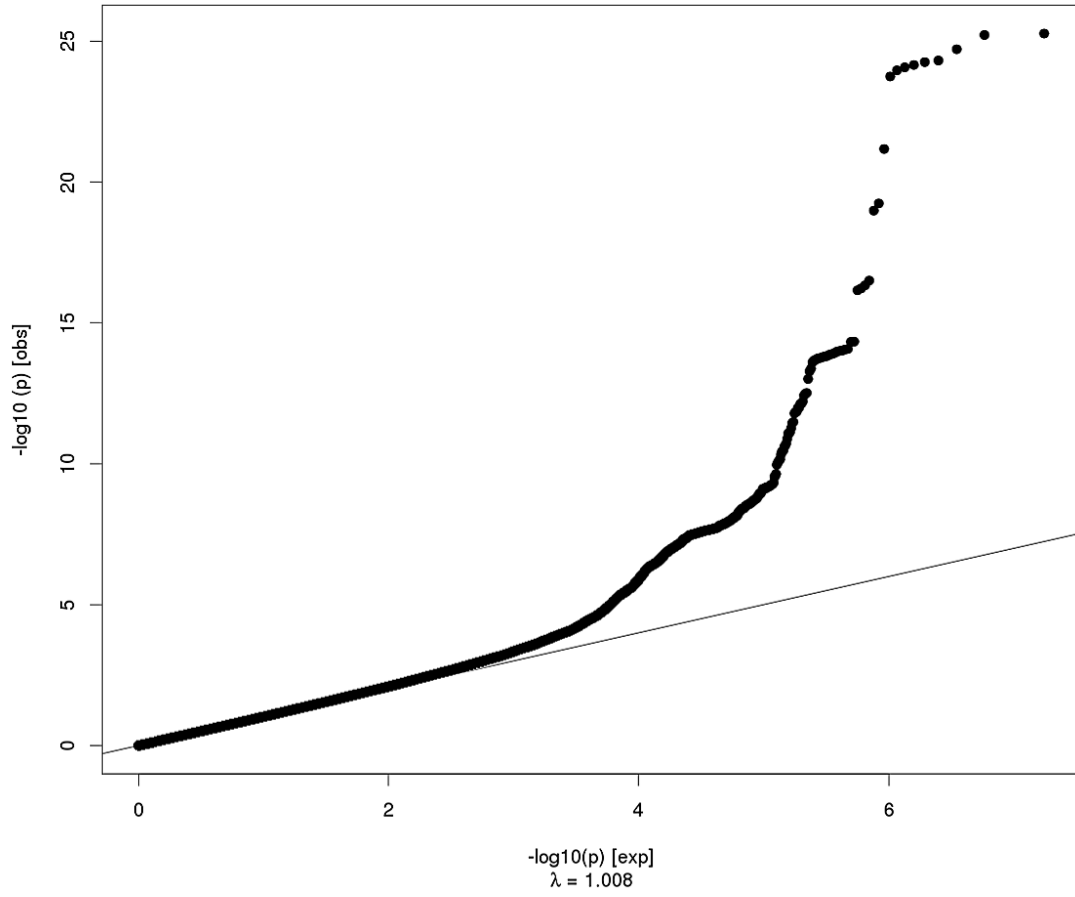

Superior Parietal Thickness

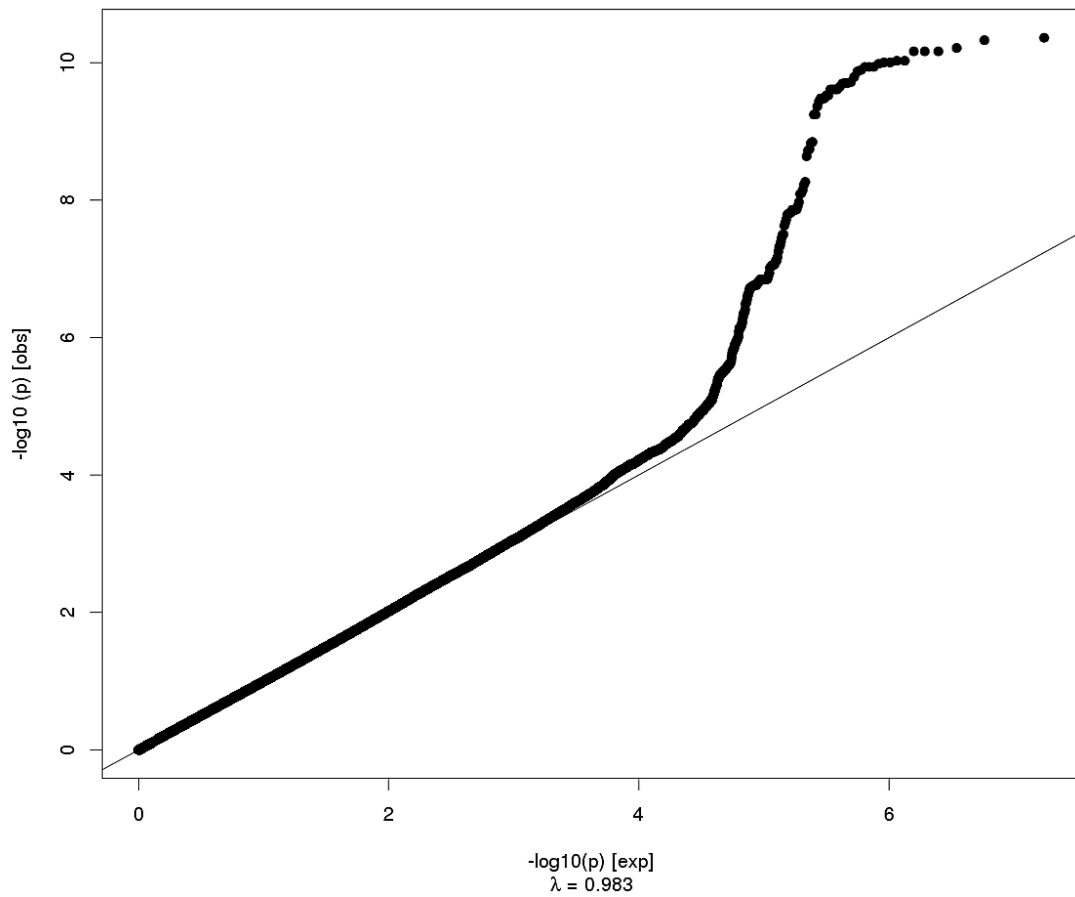

### Supramarginal Surface Area

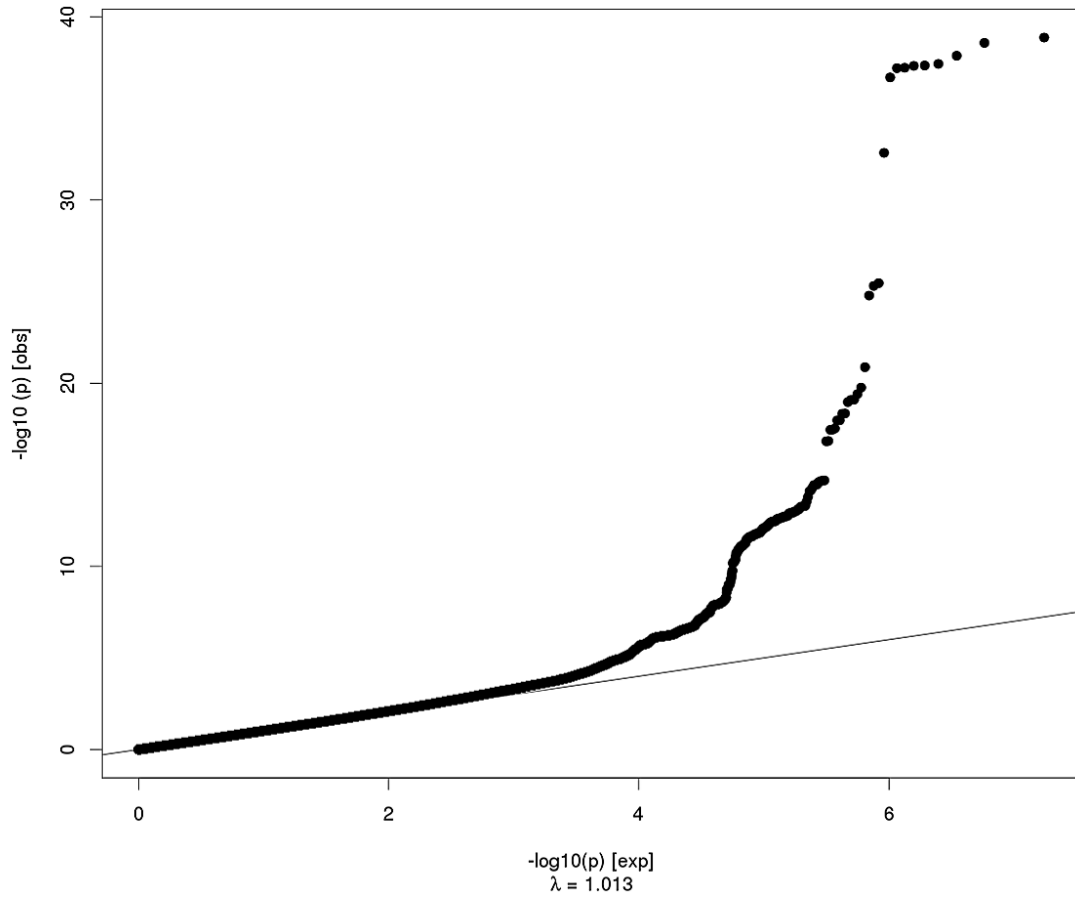

### Supramarginal Thickness

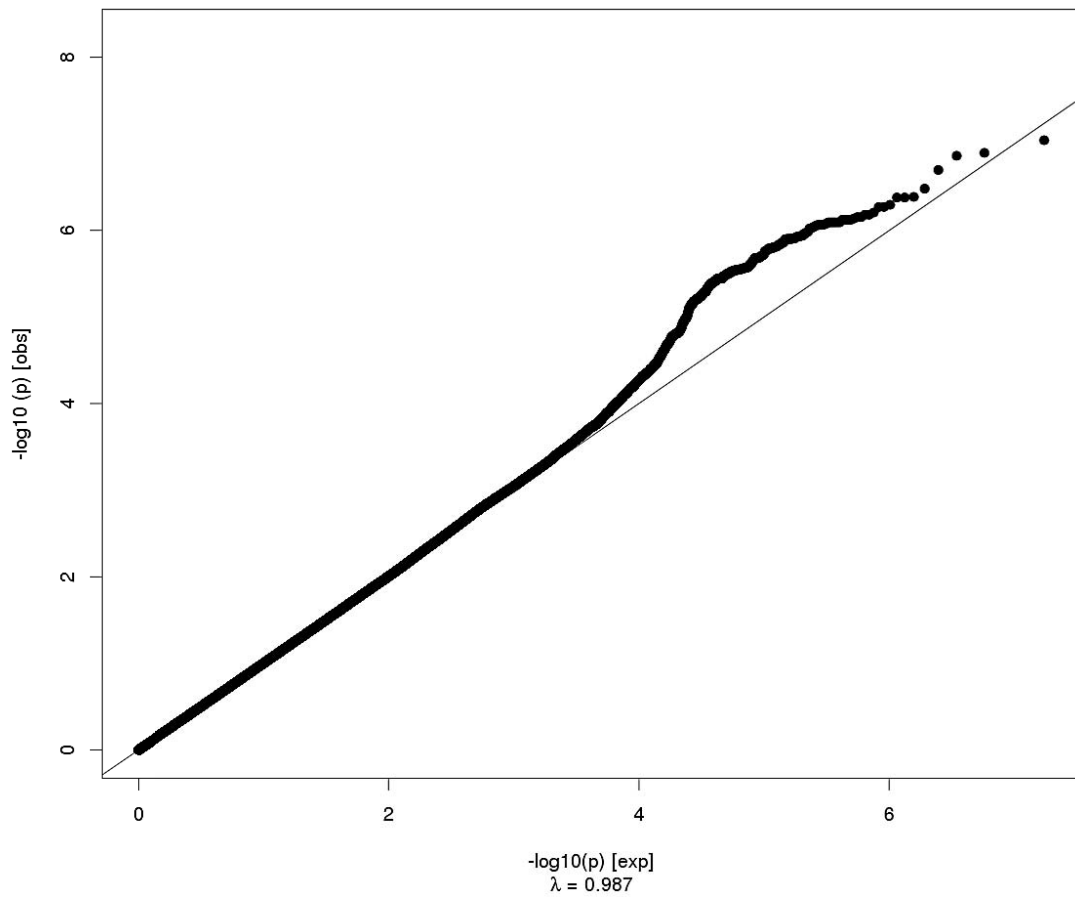

### Inferior Parietal Surface Area

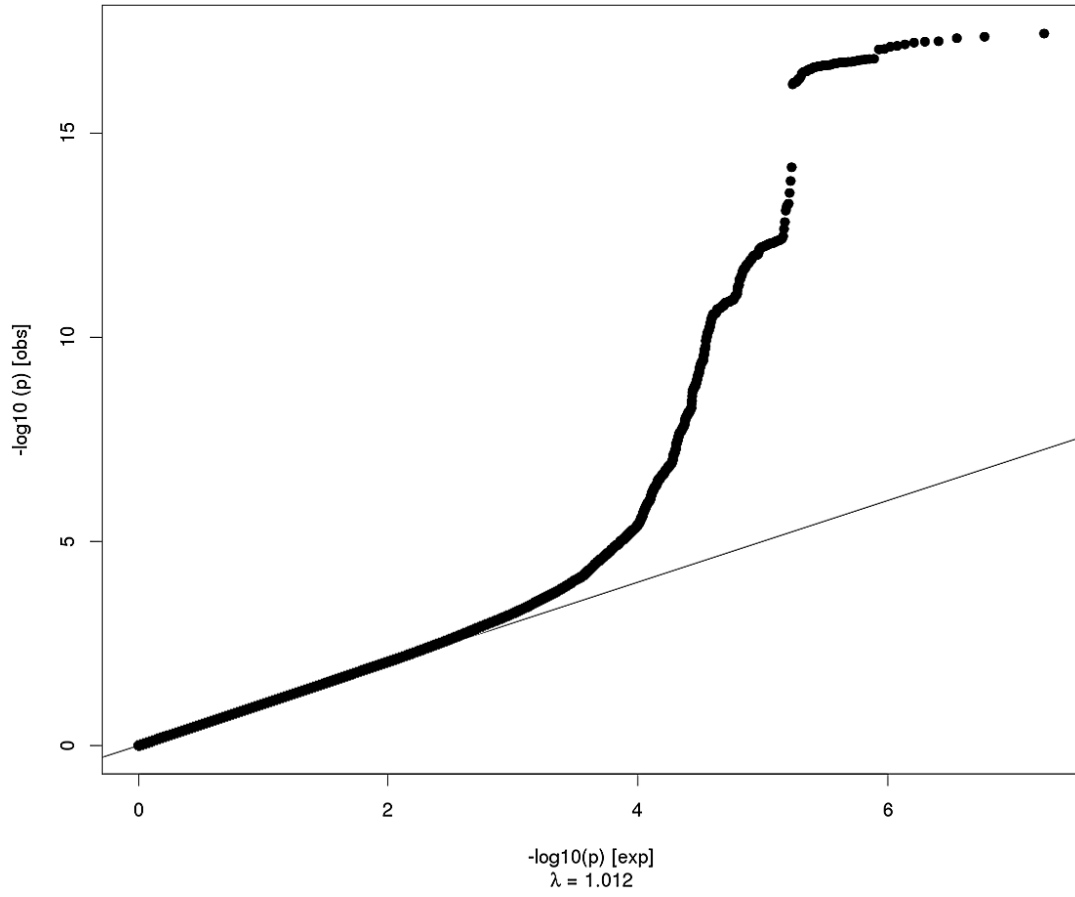

### Inferior Parietal Thickness

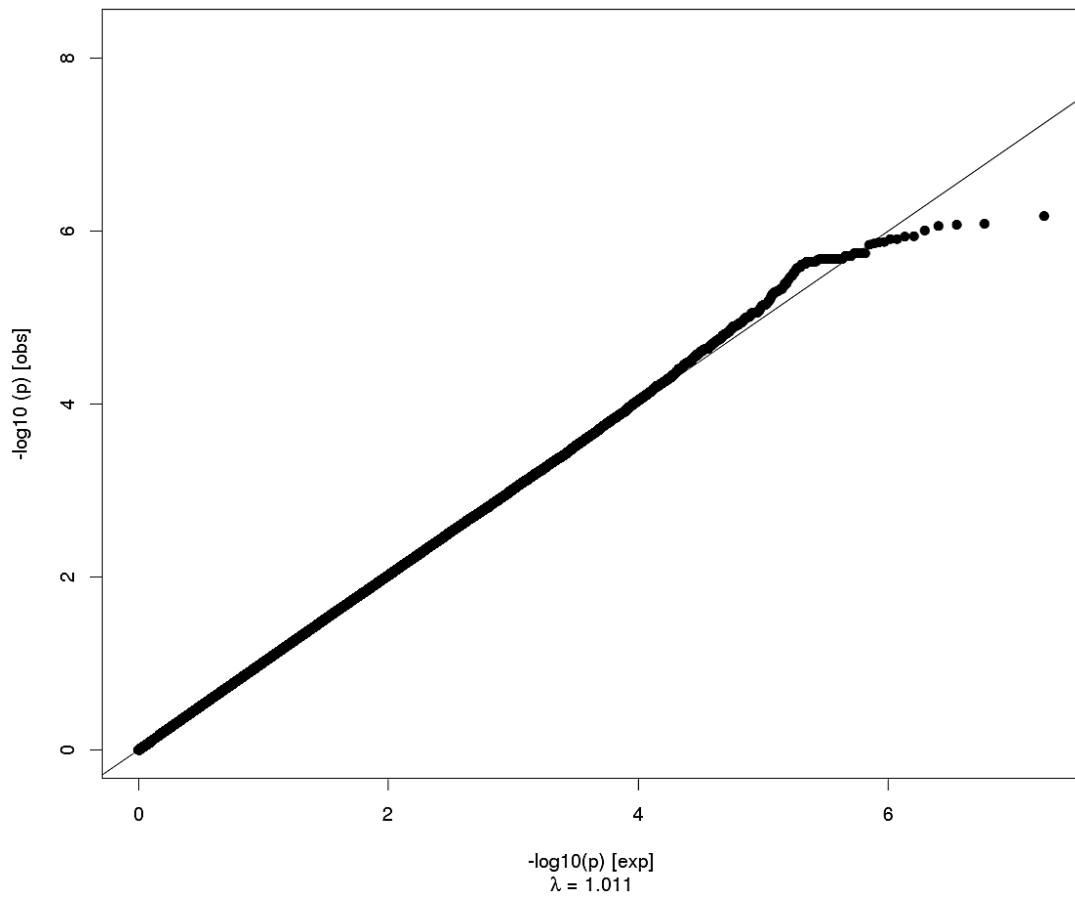

Posterior Cingulate Surface Area

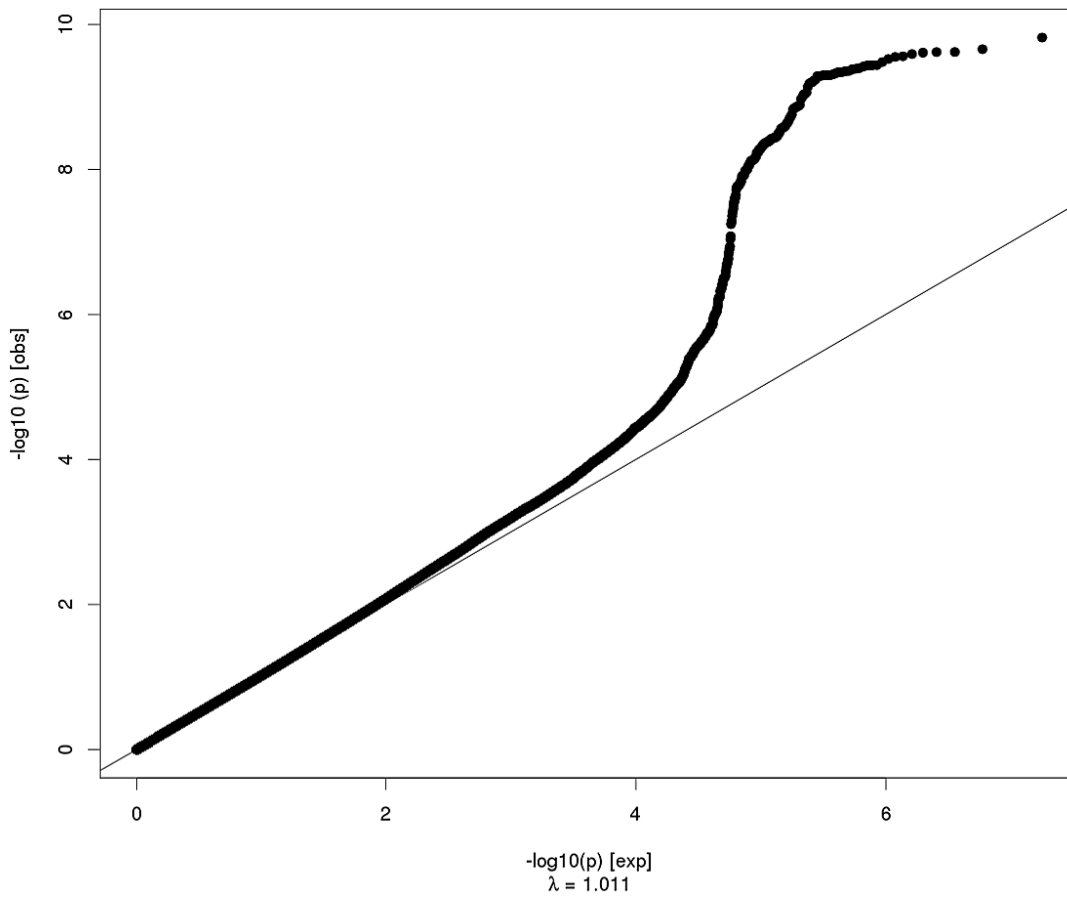

Posterior Cingulate Thickness

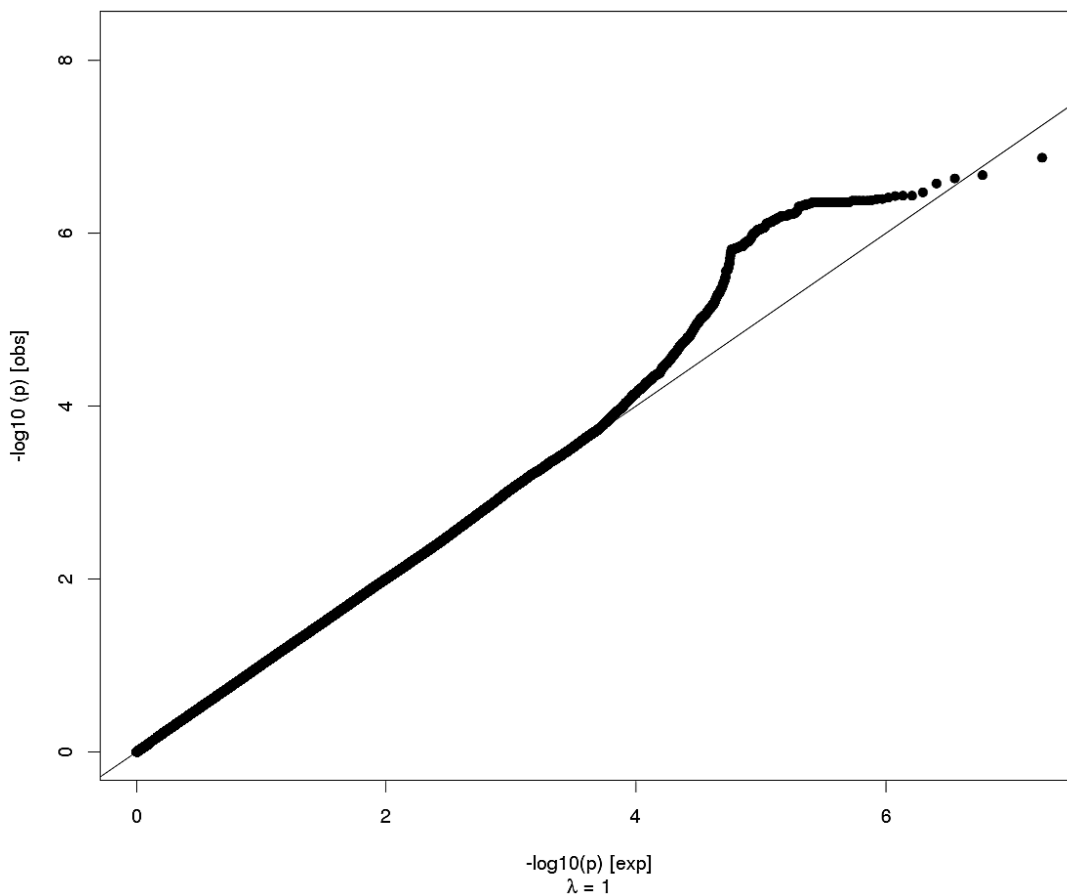

Isthmus Cingulate Surface Area

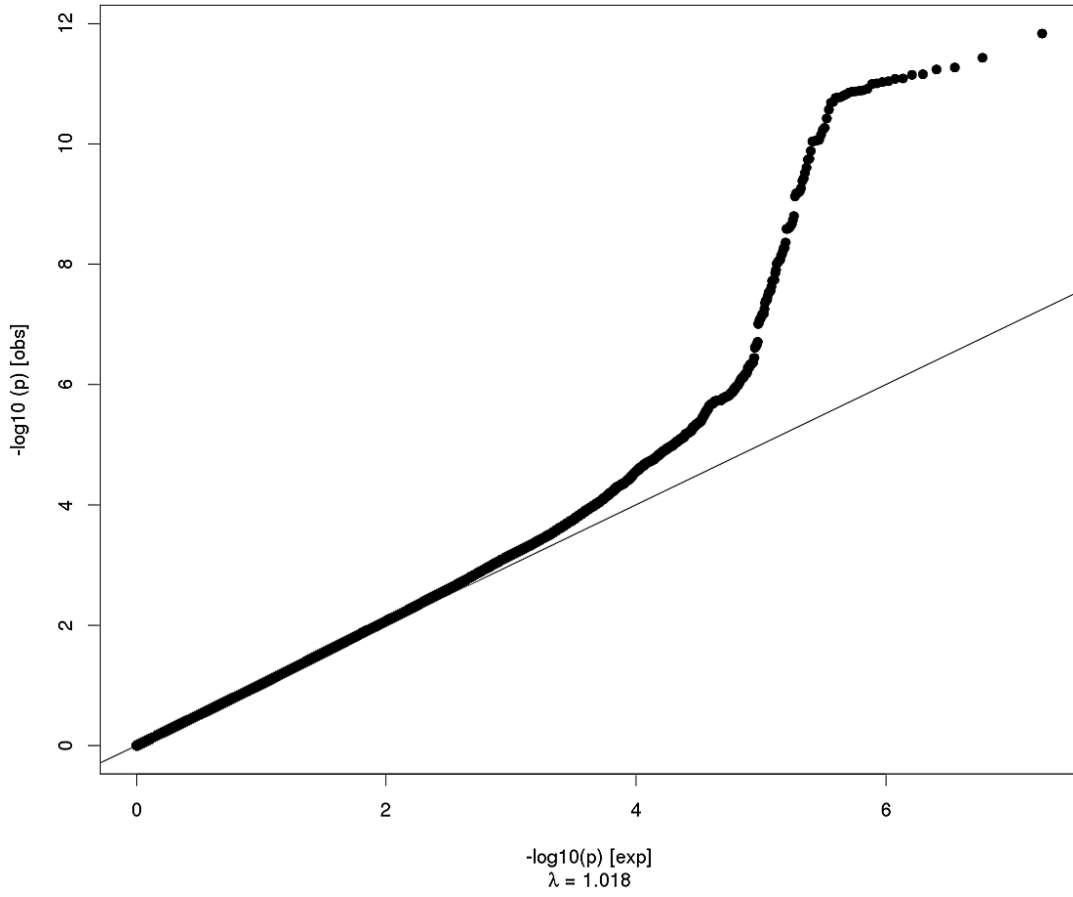

Isthmus Cingulate Thickness

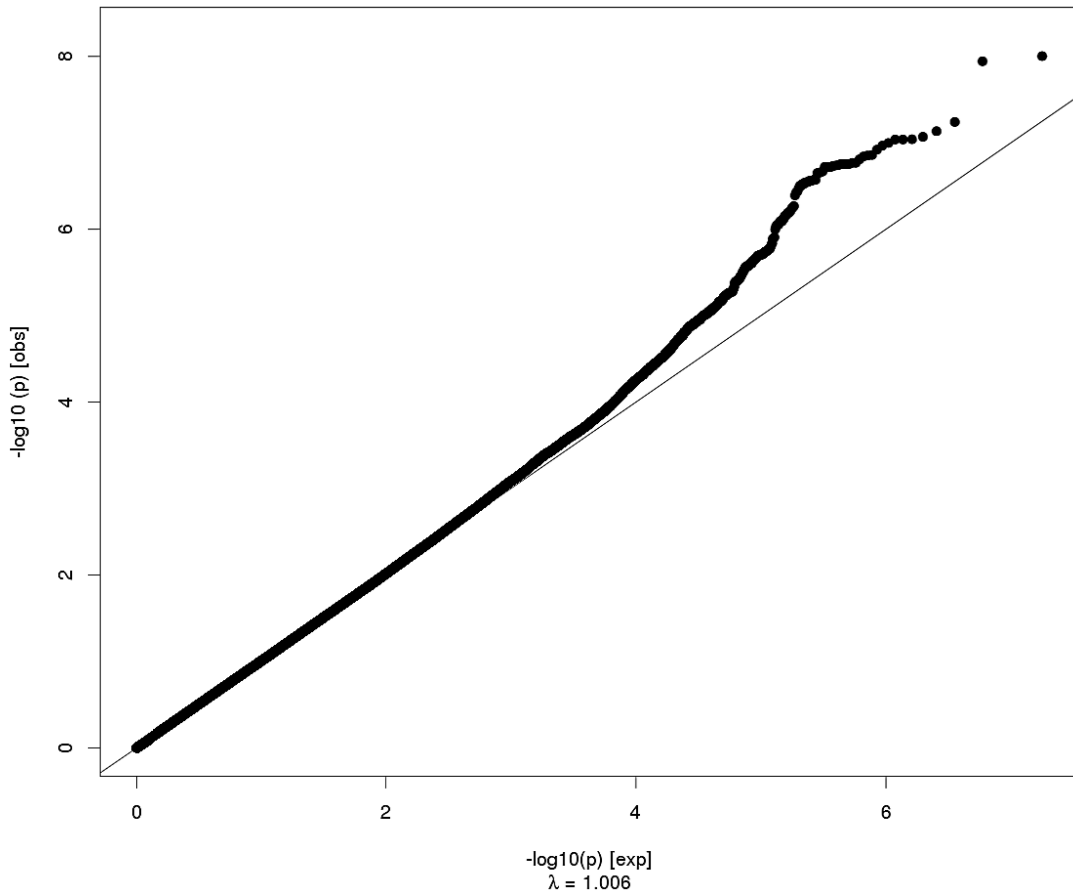

Insula Surface Area

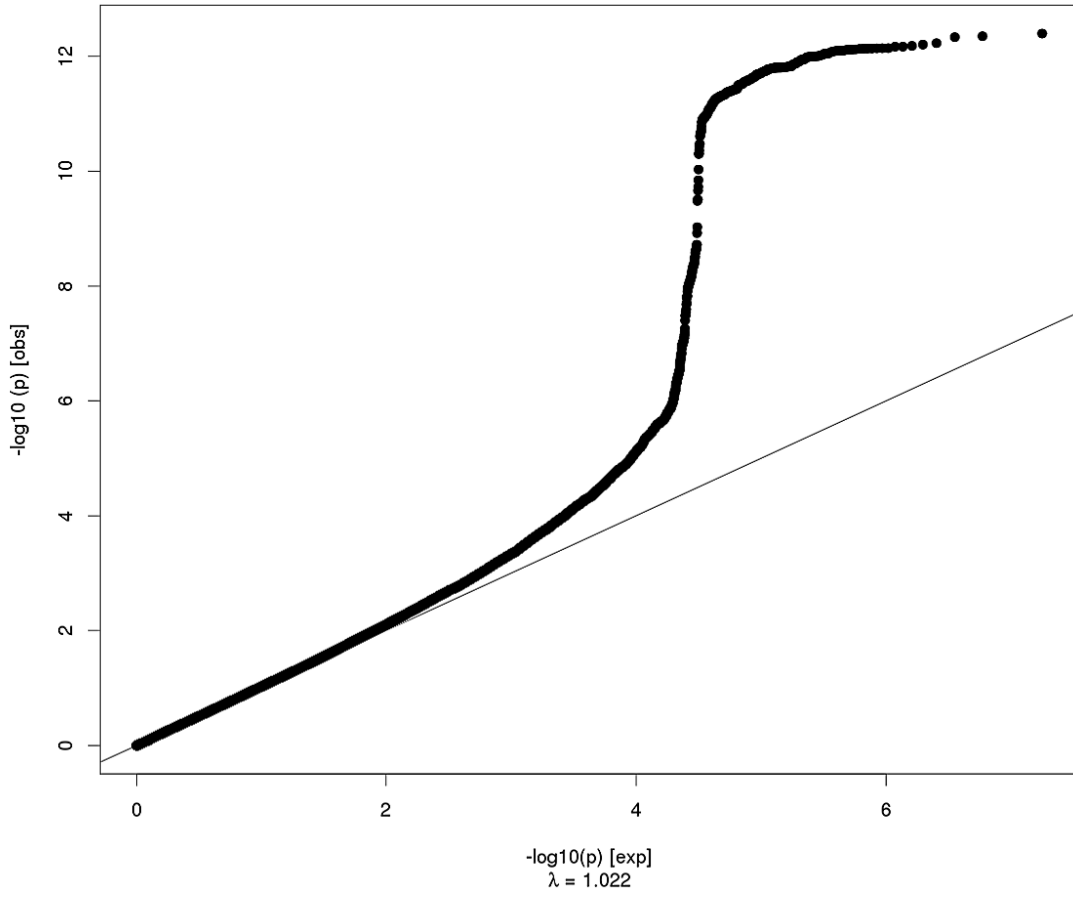

Insula Thickness

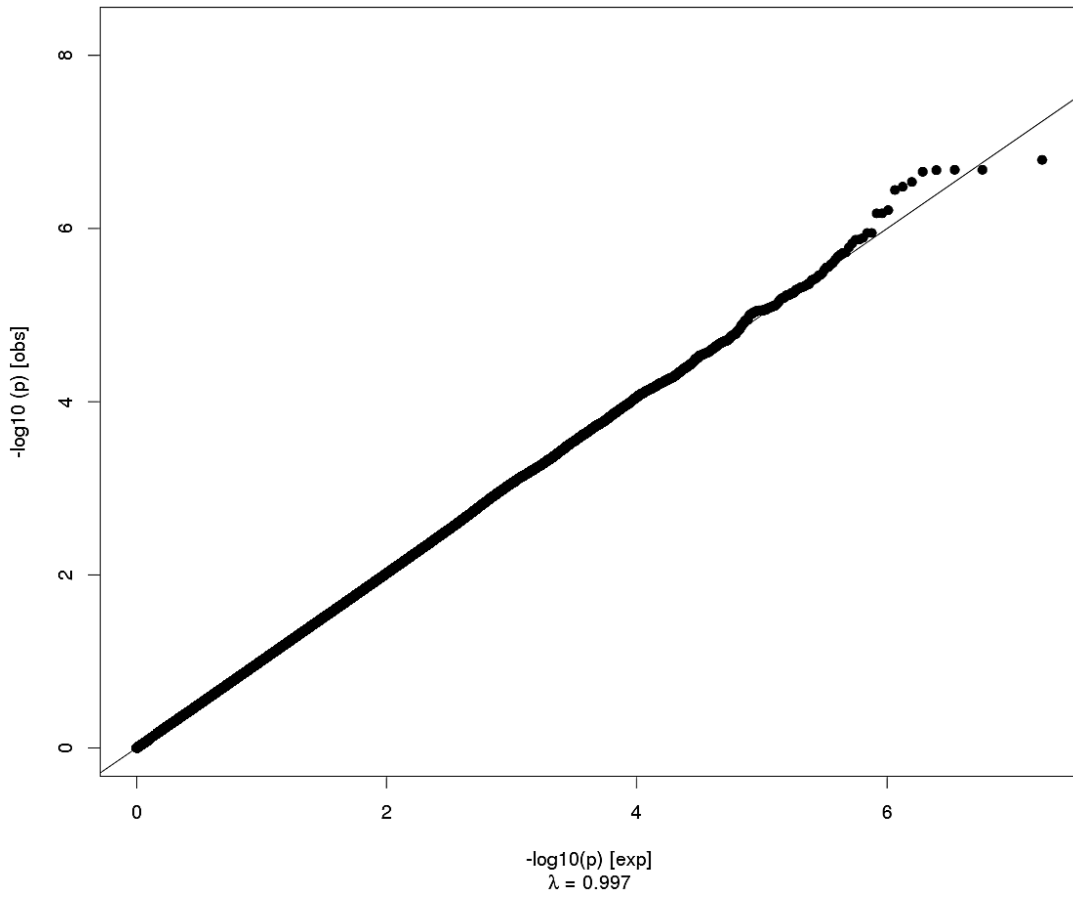

Entorhinal Surface Area

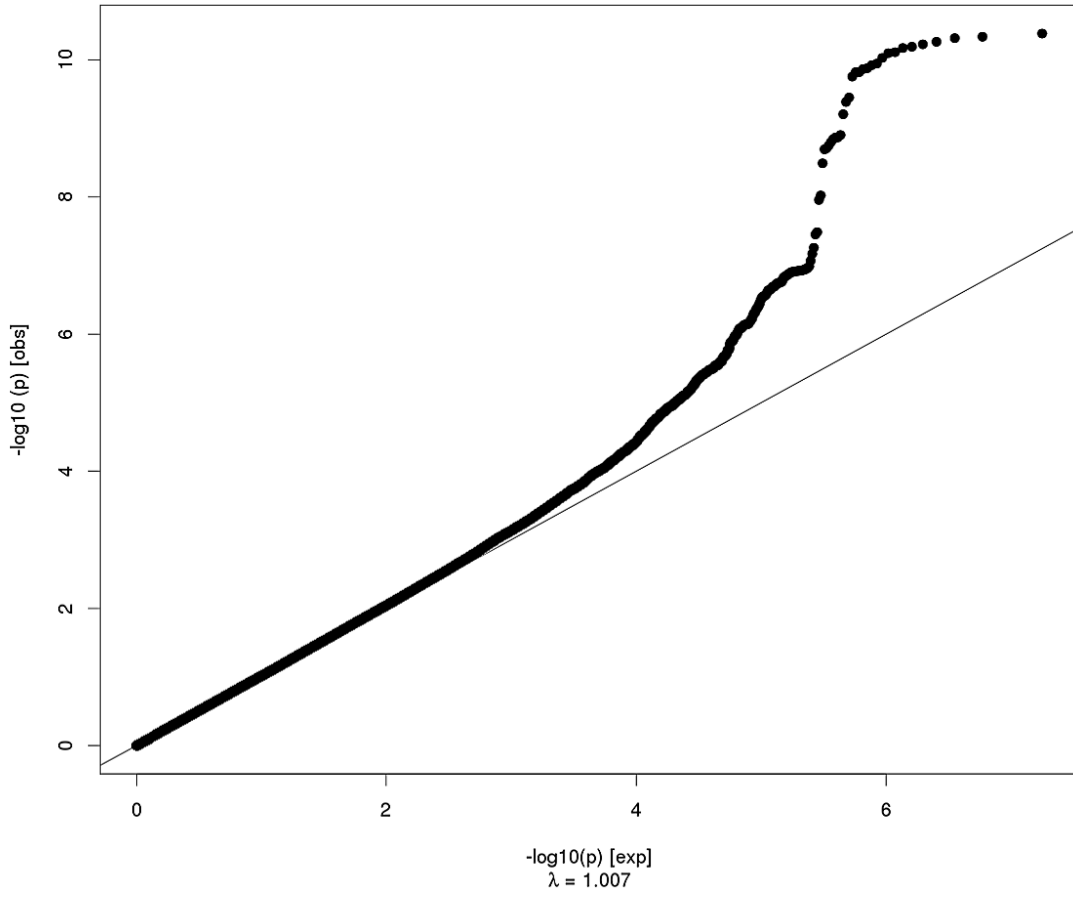

Entorhinal Thickness

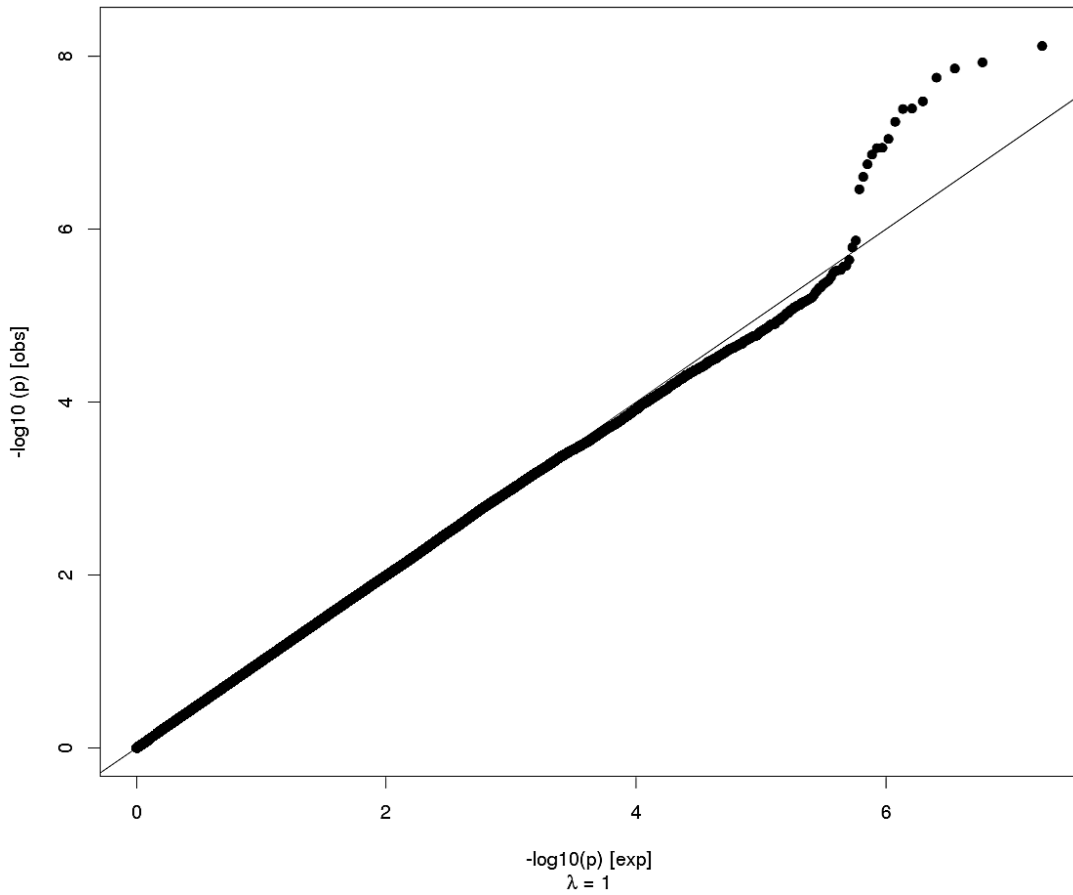



Parahippocampal Surface Area

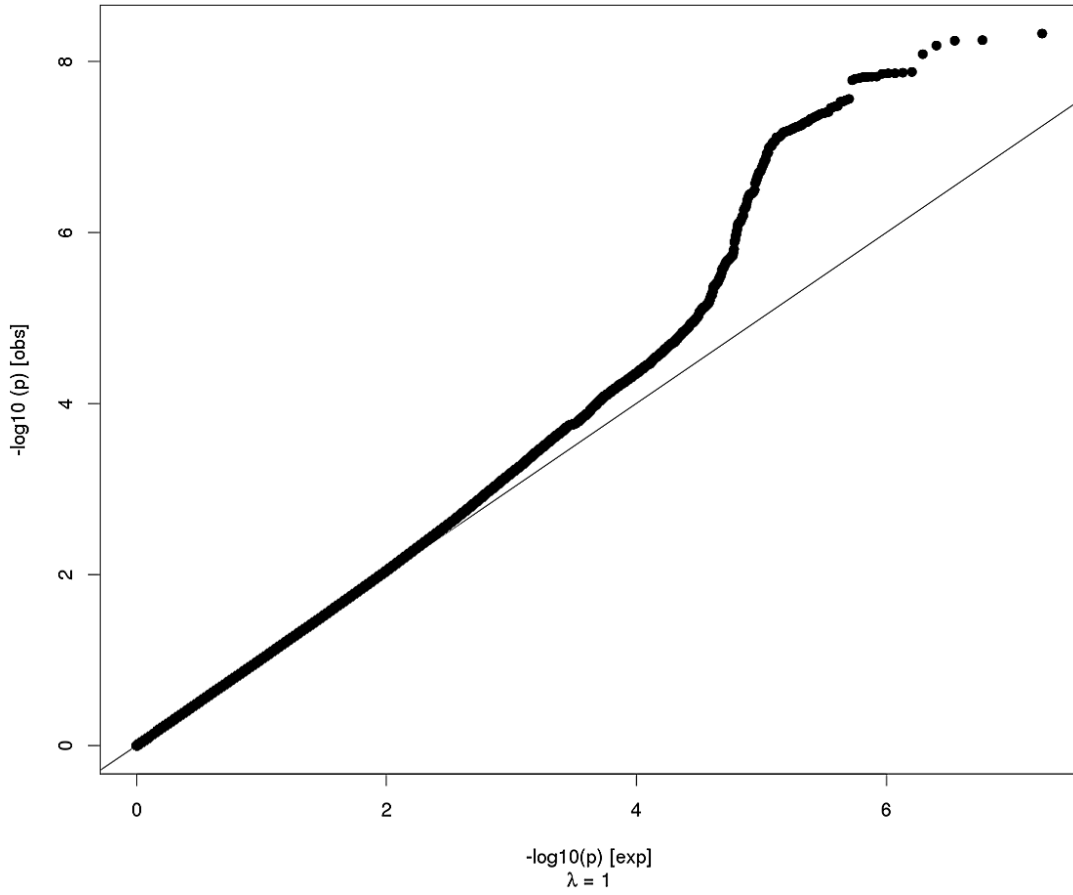

Parahippocampal Thickness

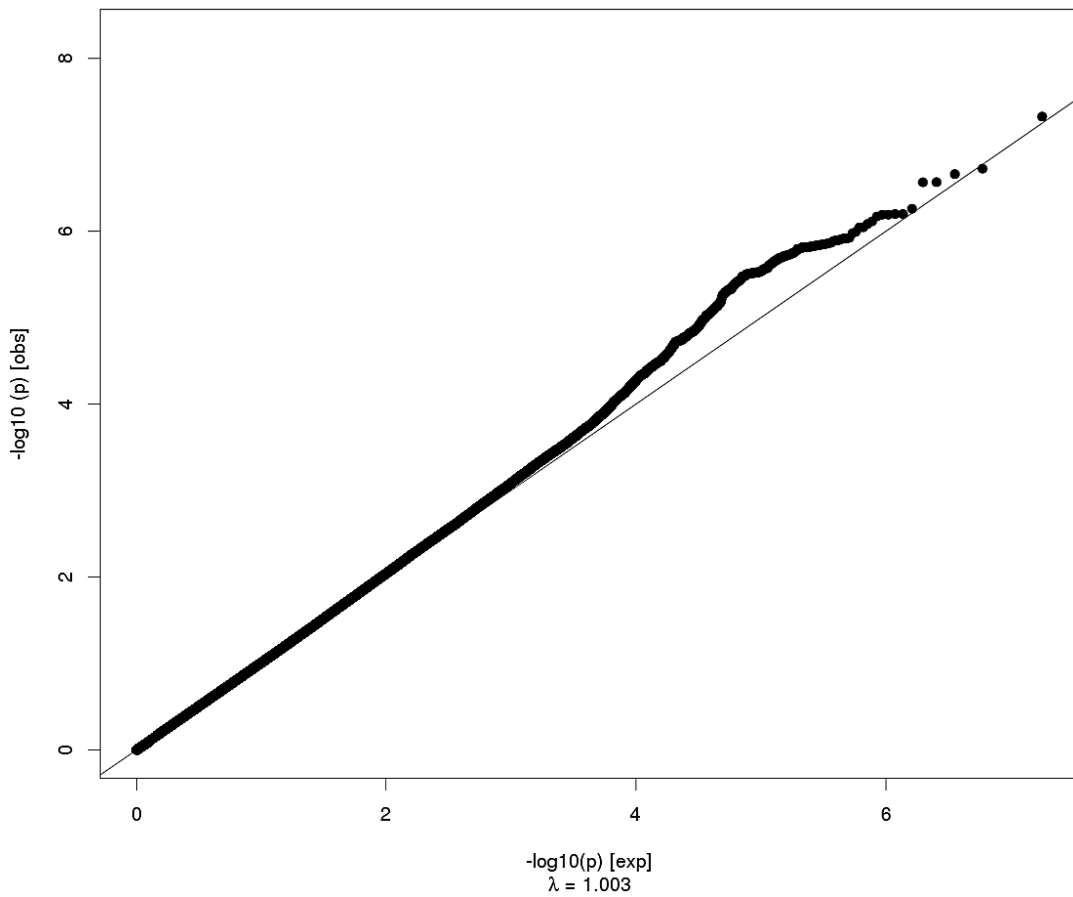

Fusiform Surface Area

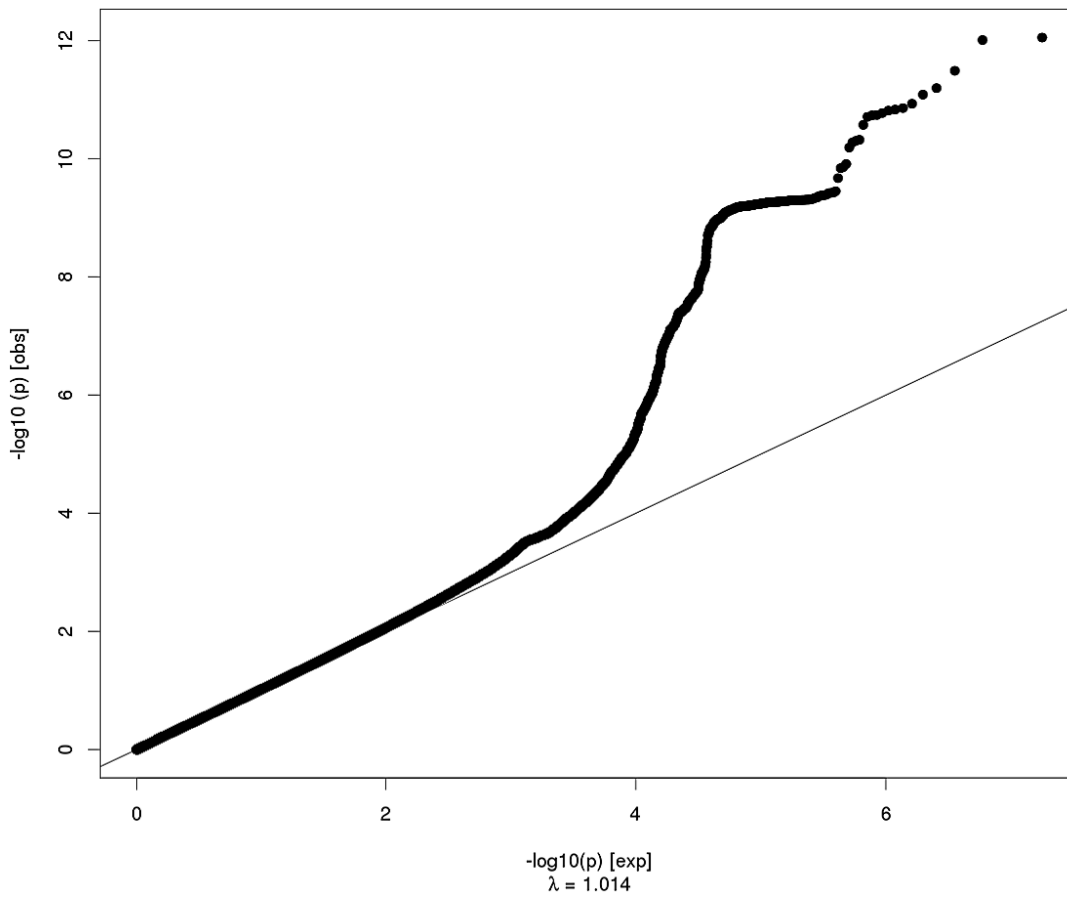

Fusiform Thickness

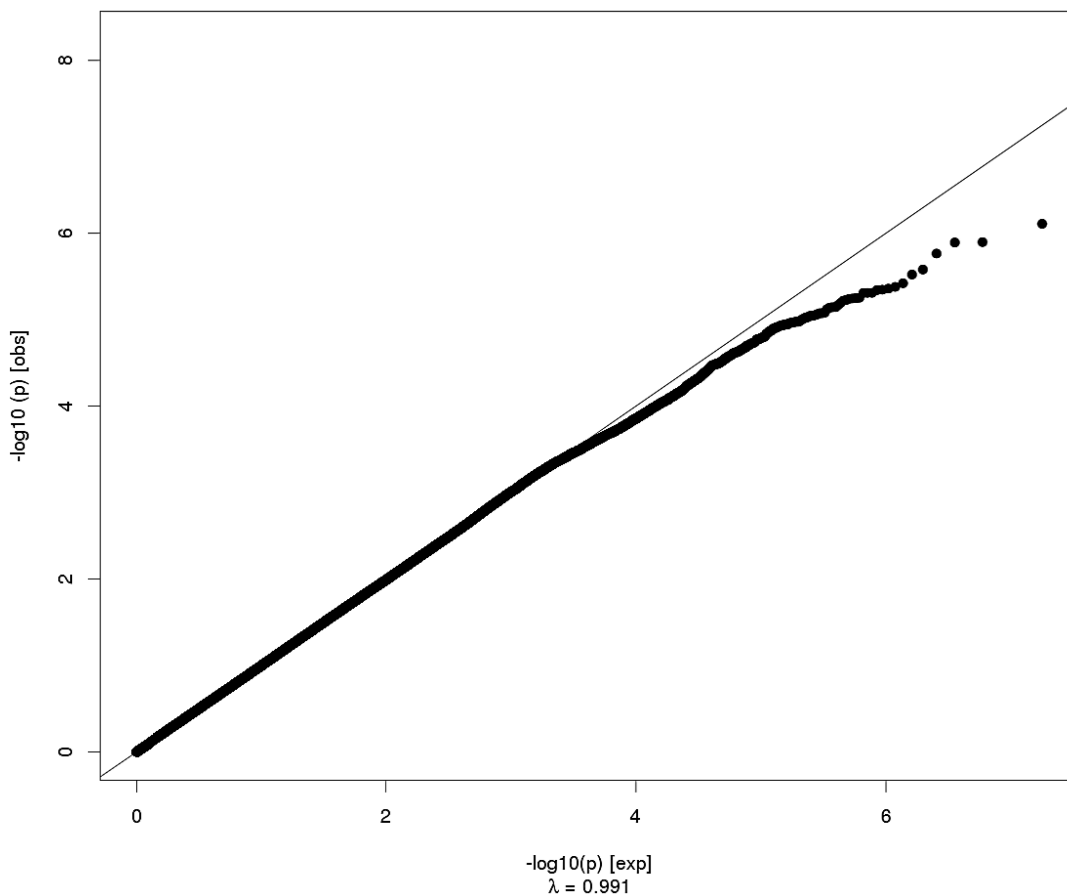

Temporal Pole Surface Area

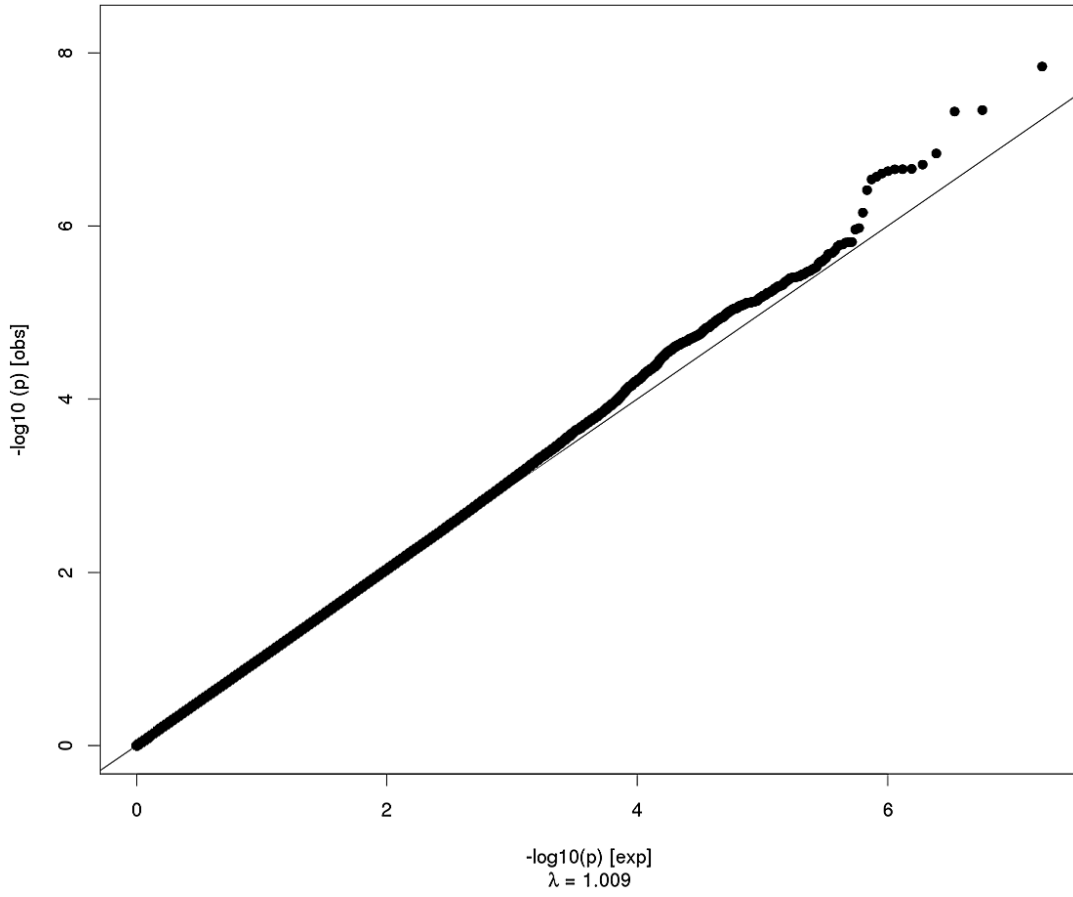

Temporal Pole Thickness

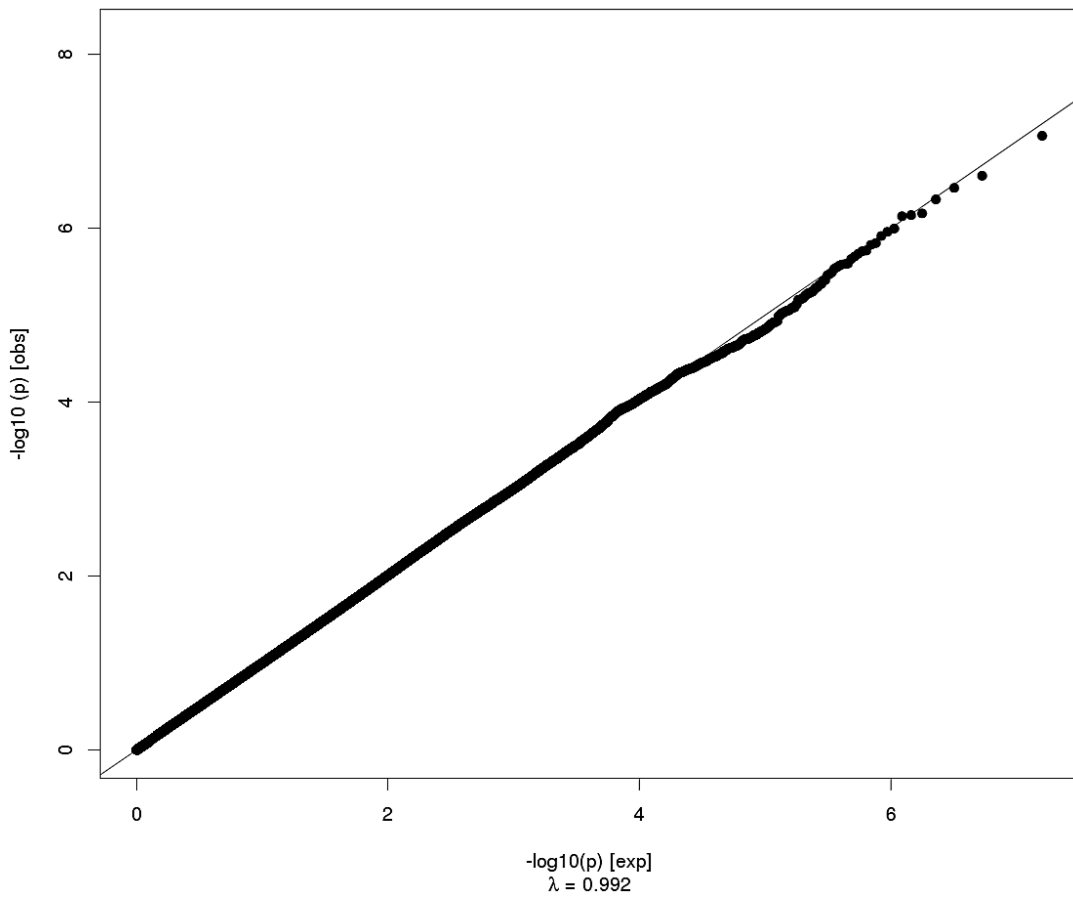

Inferior Temporal Surface Area

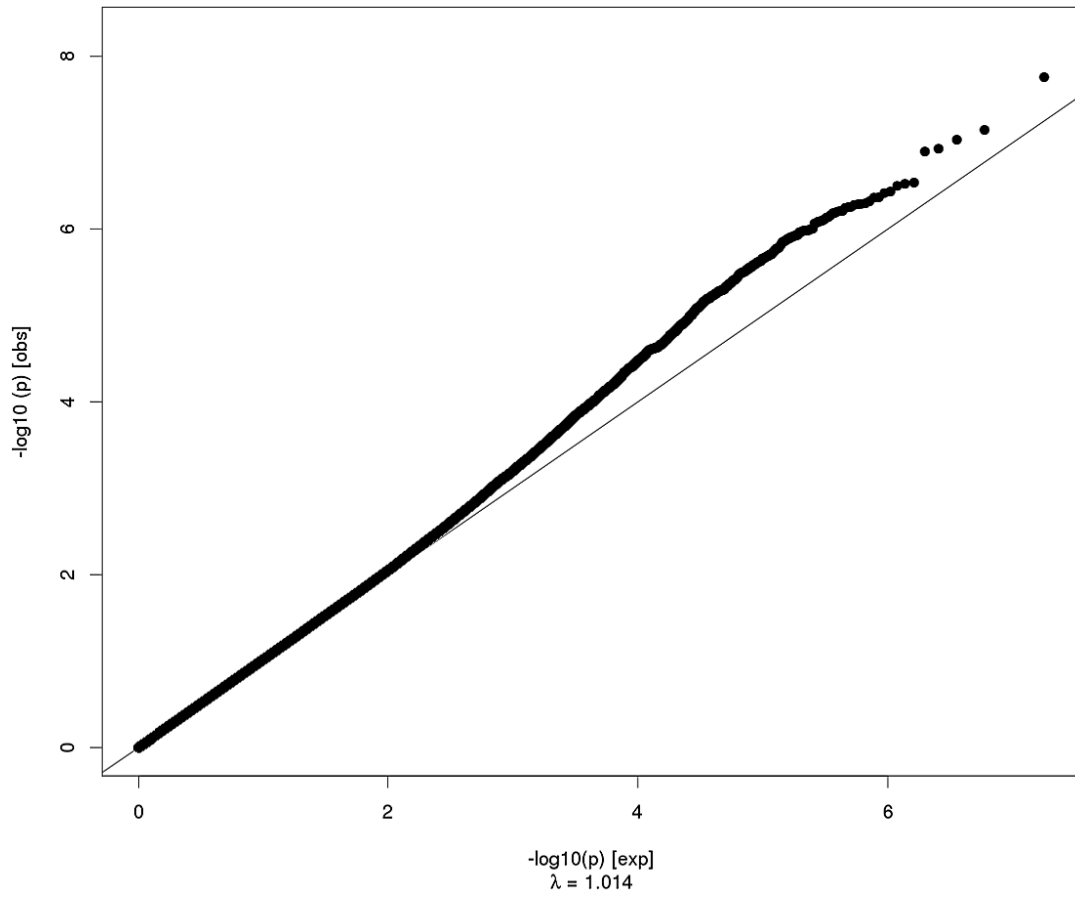

Inferior Temporal Thickness

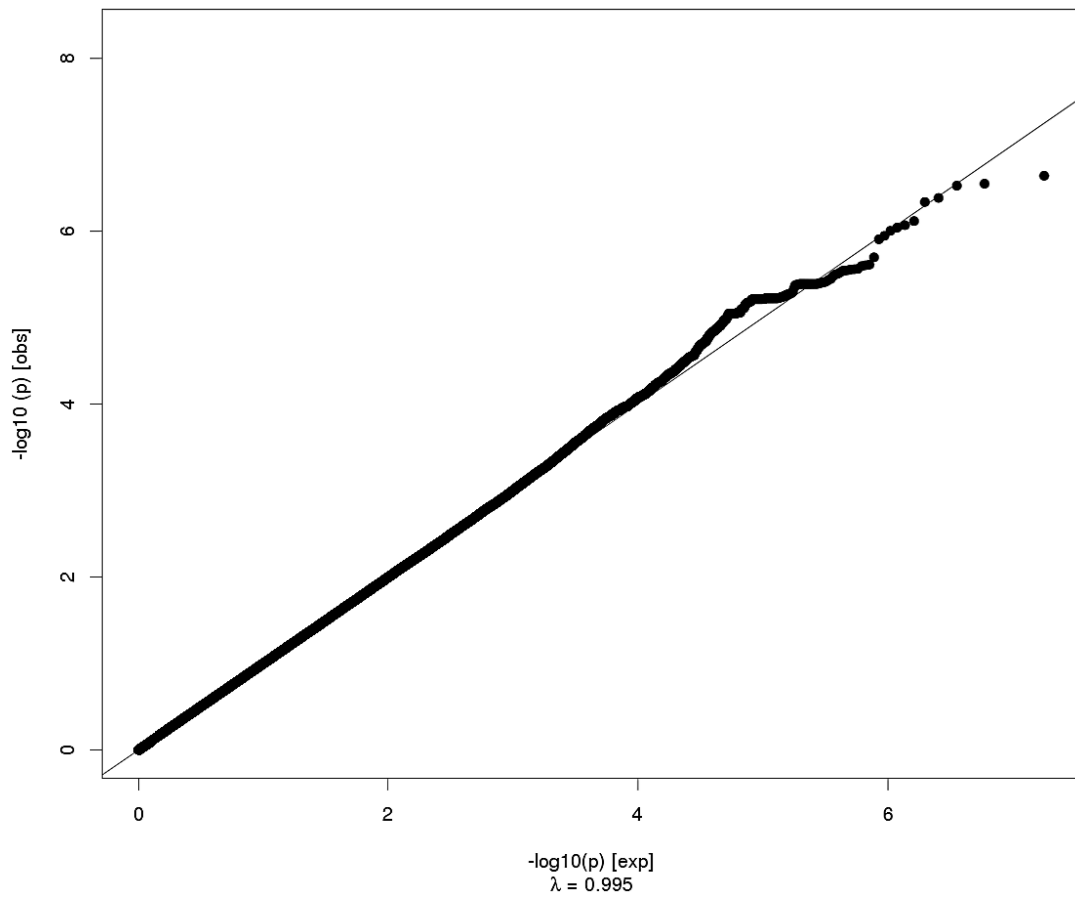

Middle Temporal Surface Area

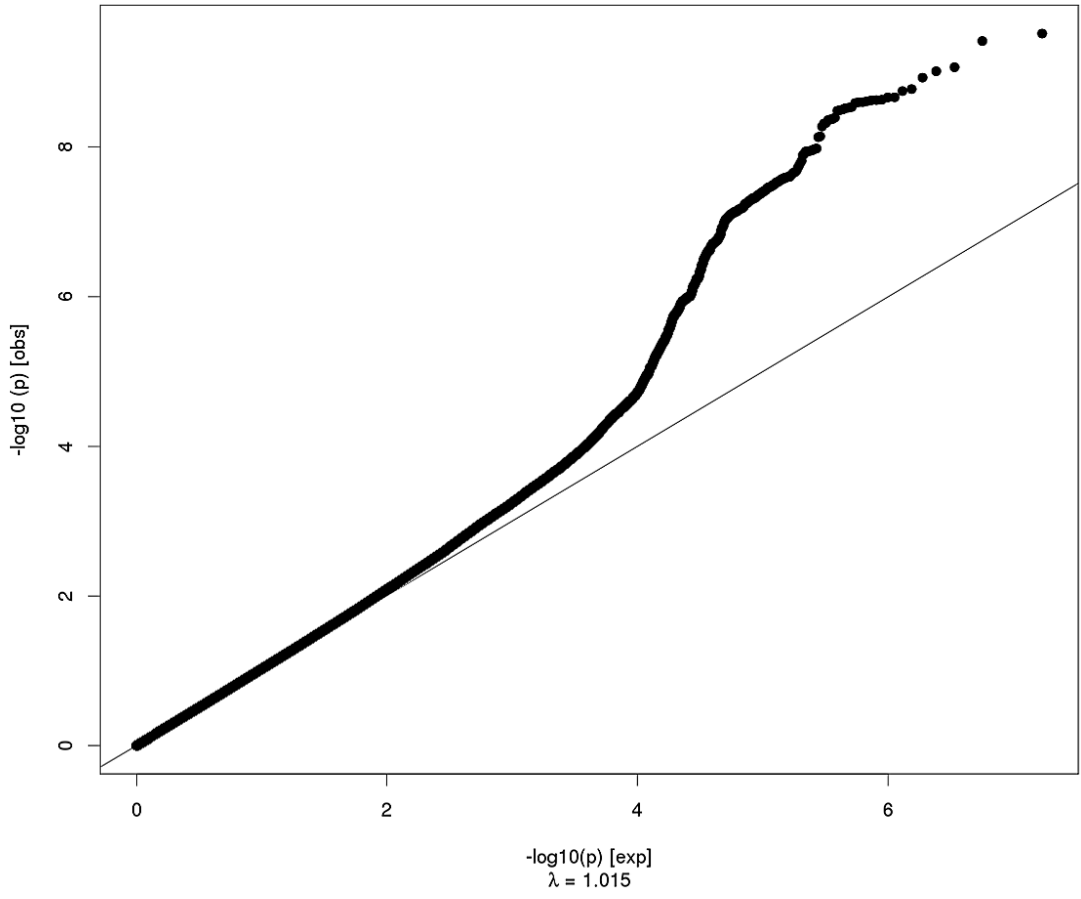

Middle Temporal Thickness

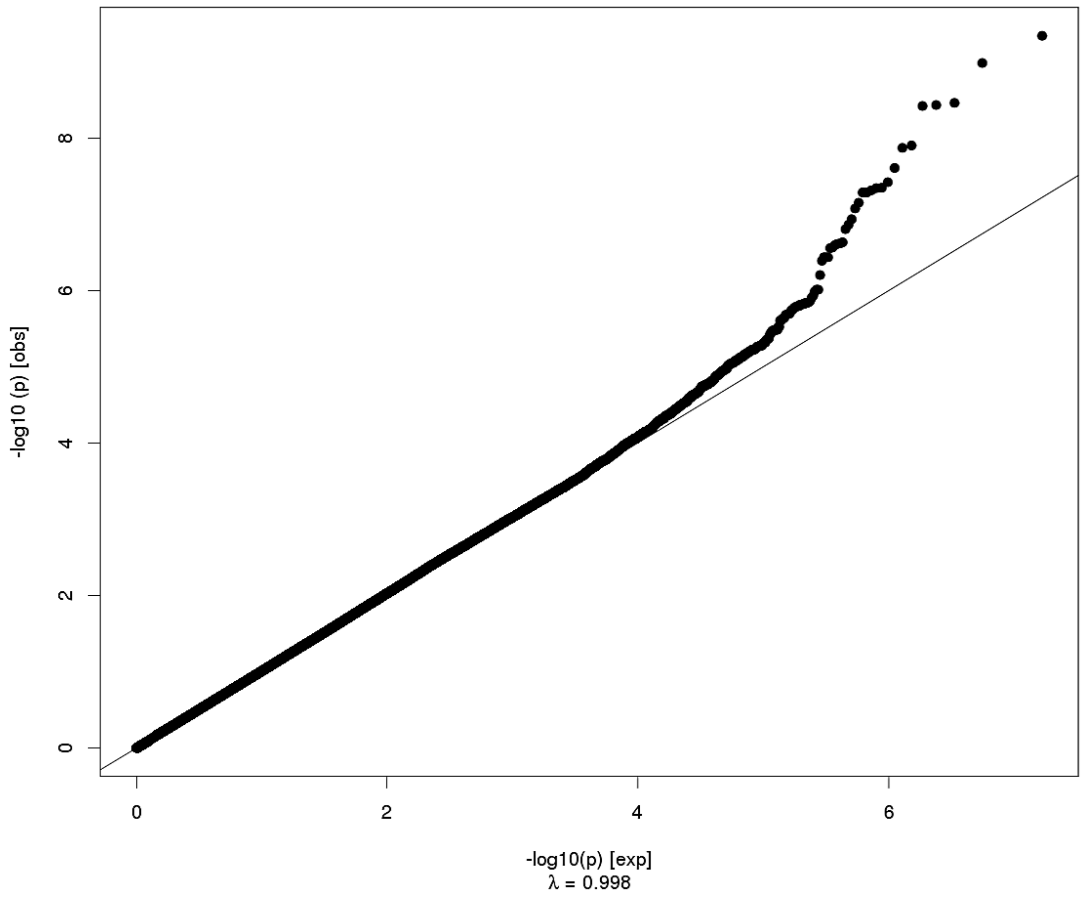

Superior Temporal Surface Area

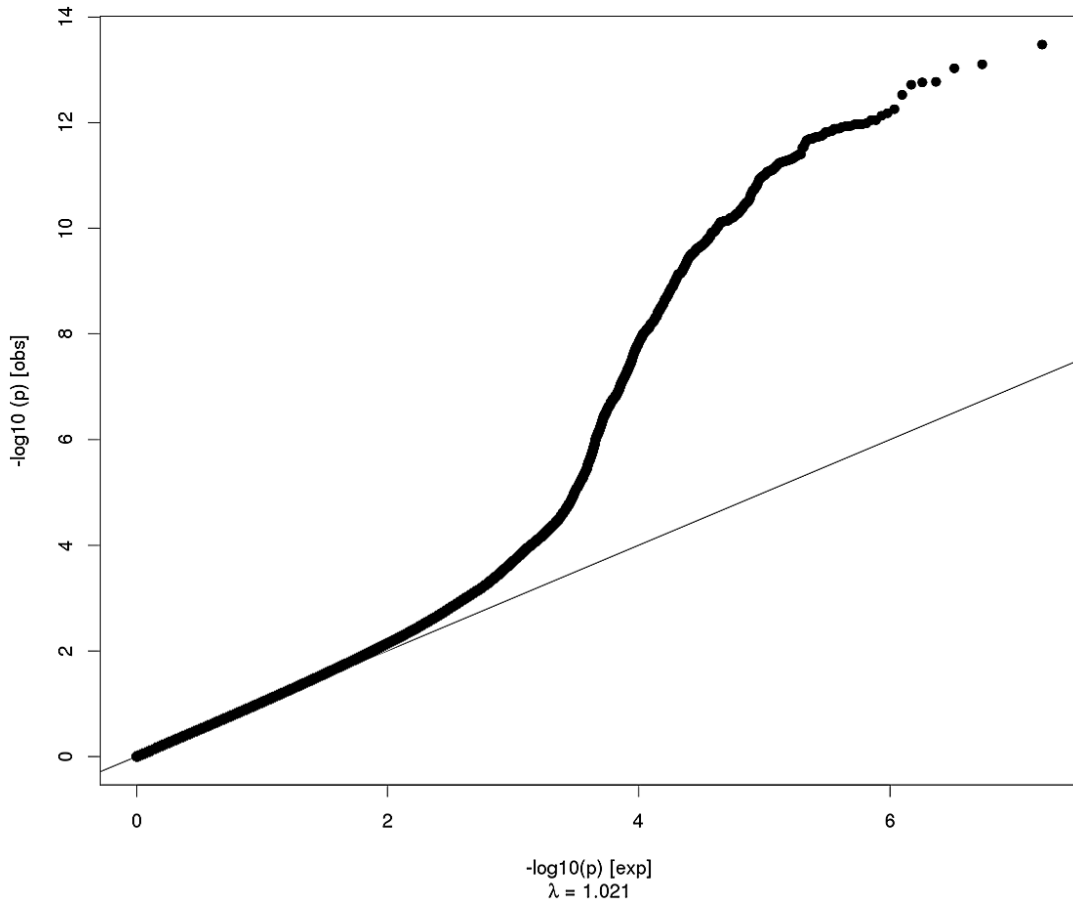

Superior Temporal Thickness

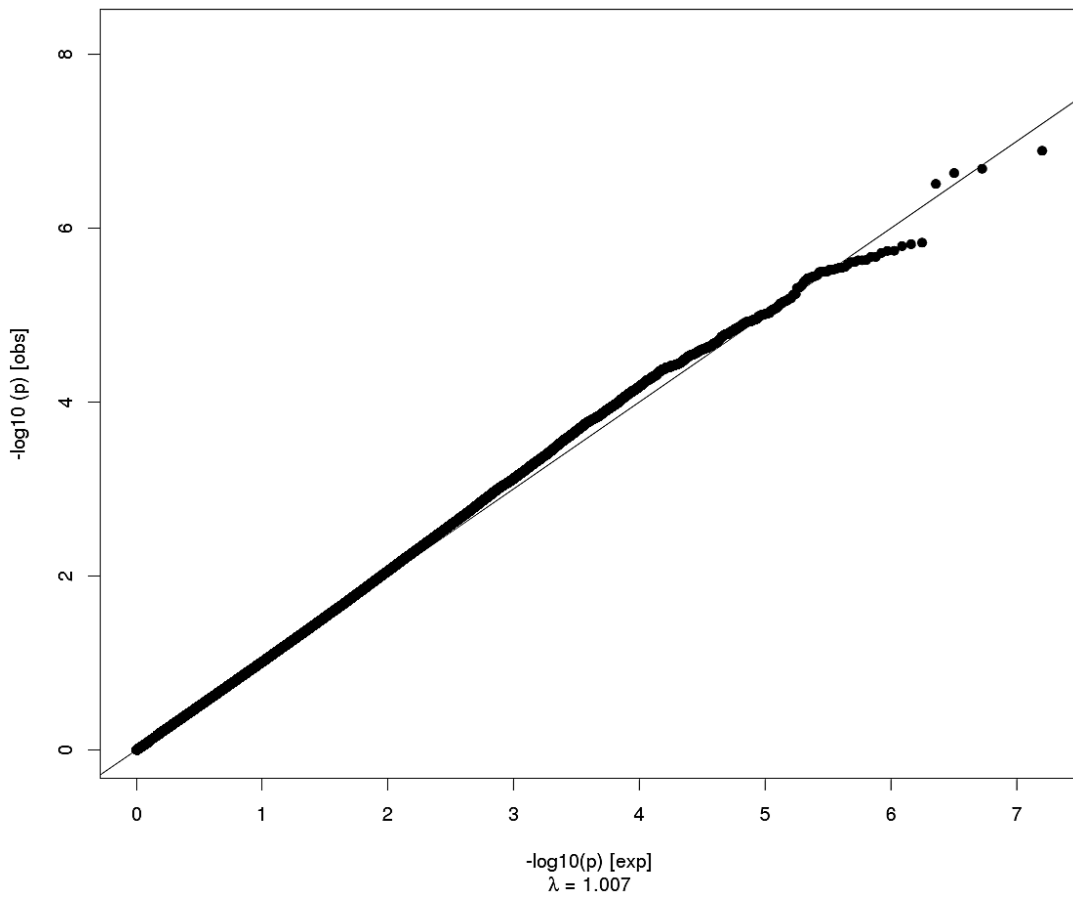

Banks of the Superior Temporal Sulcus Surface Area

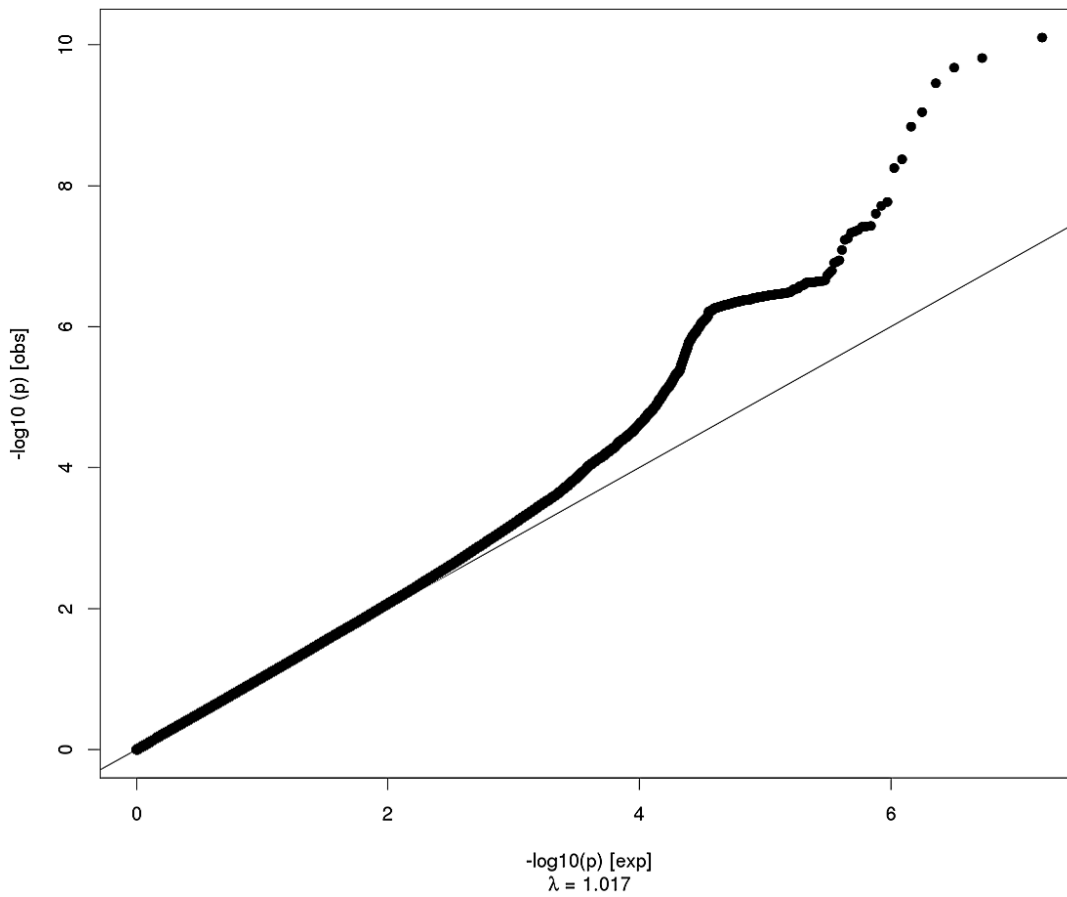

Banks of the Superior Temporal Sulcus Thickness

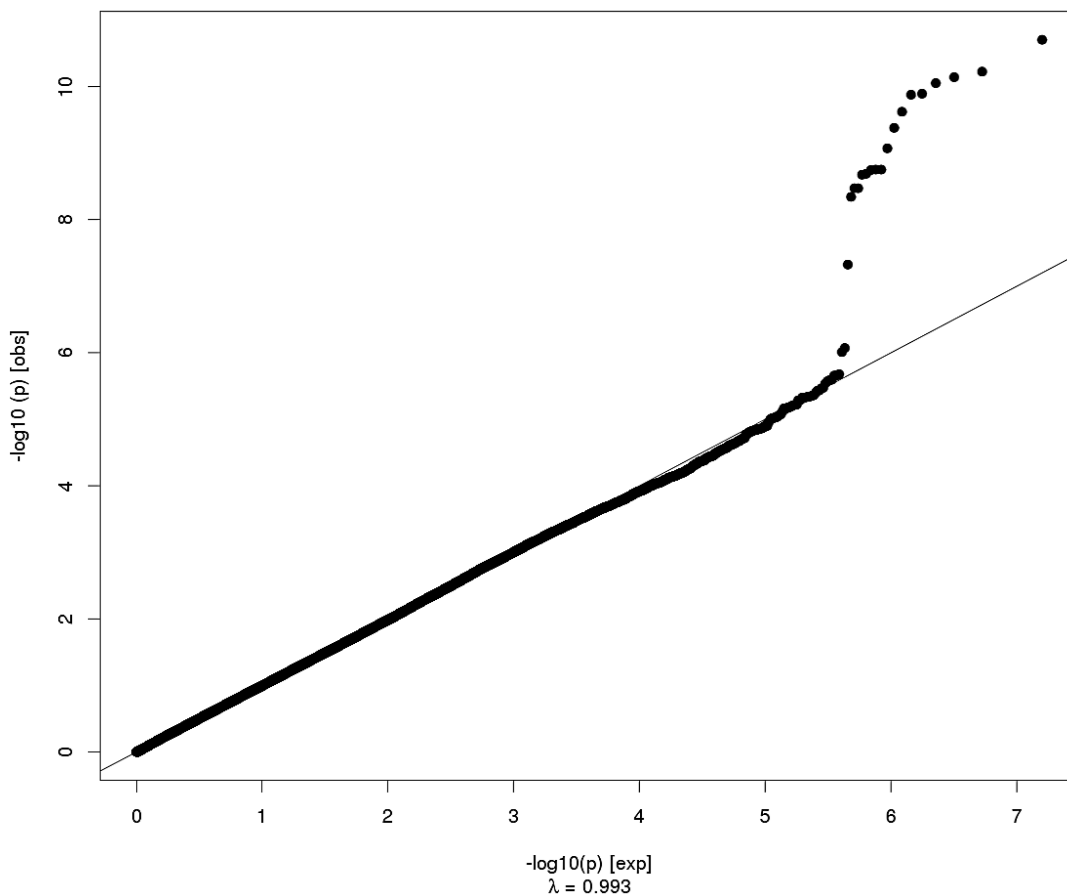

Transverse Temporal Surface Area

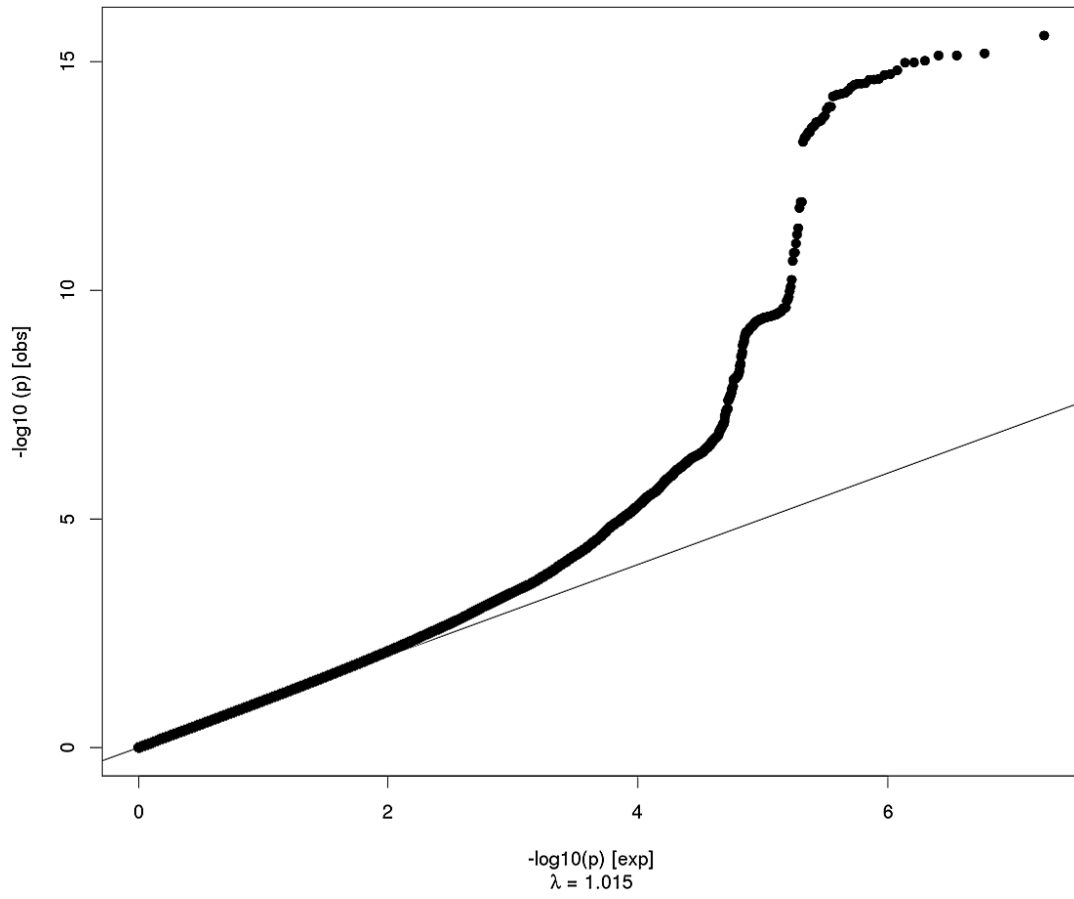

Transverse Temporal Thickness

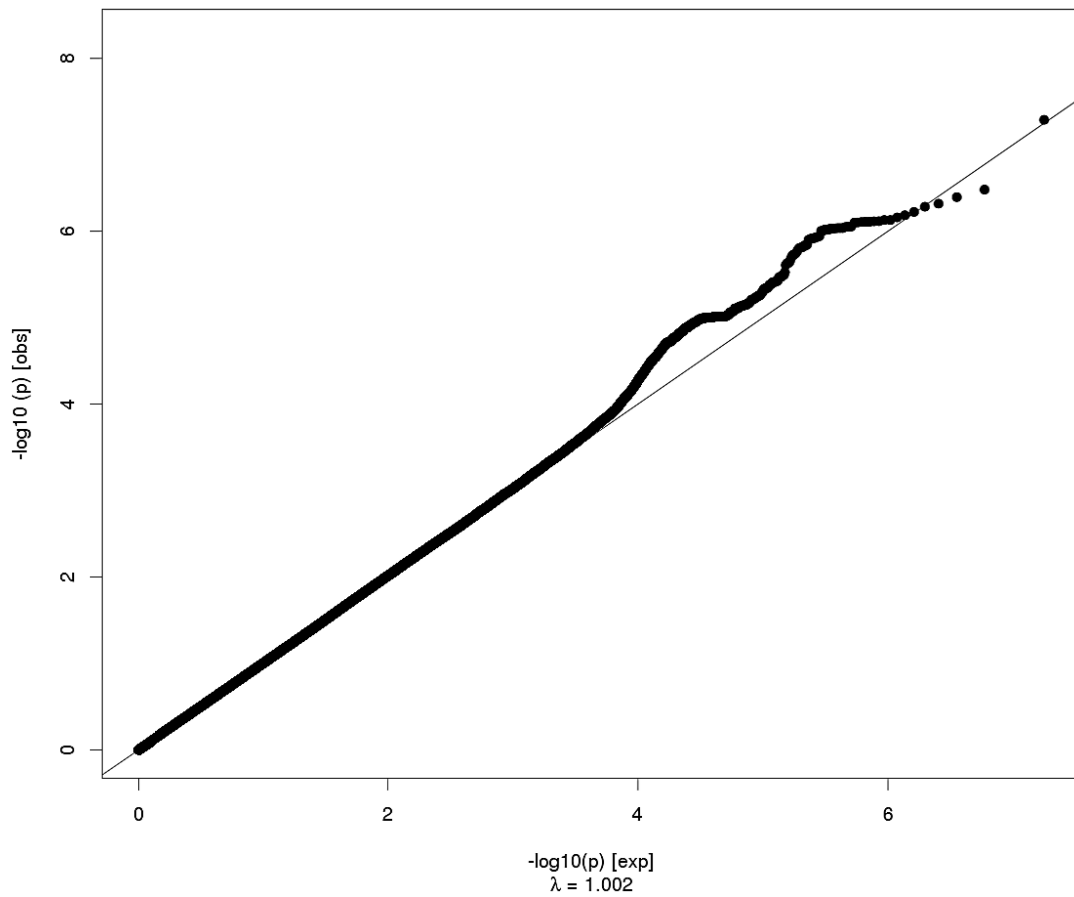



Lingual Surface Area

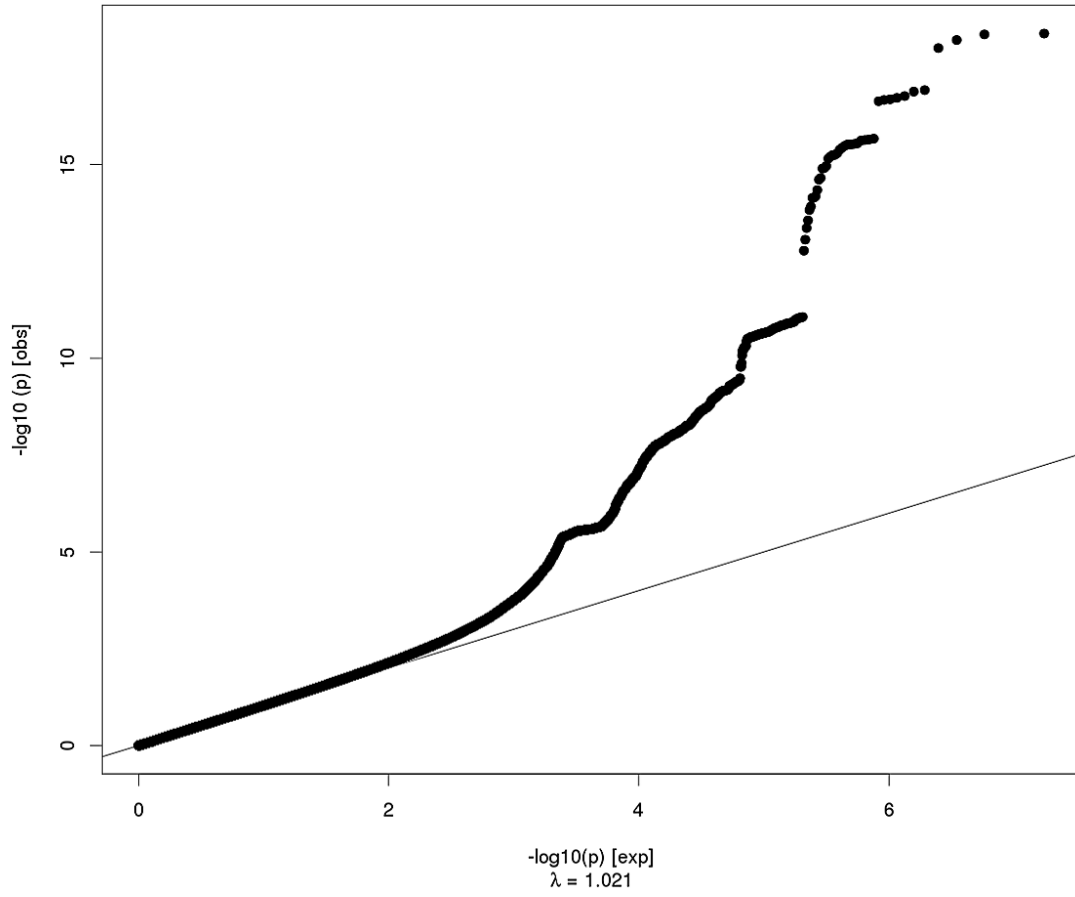

Lingual Thickness

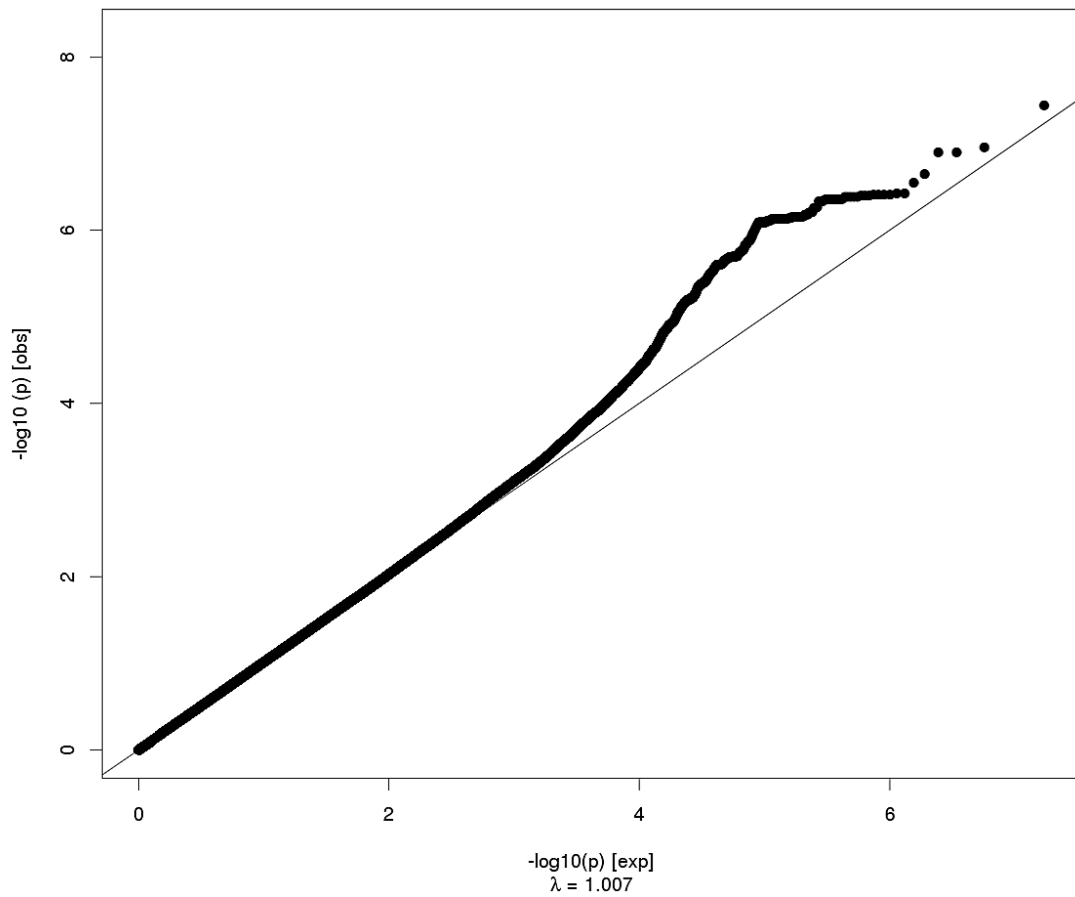

Pericalcarine Surface Area

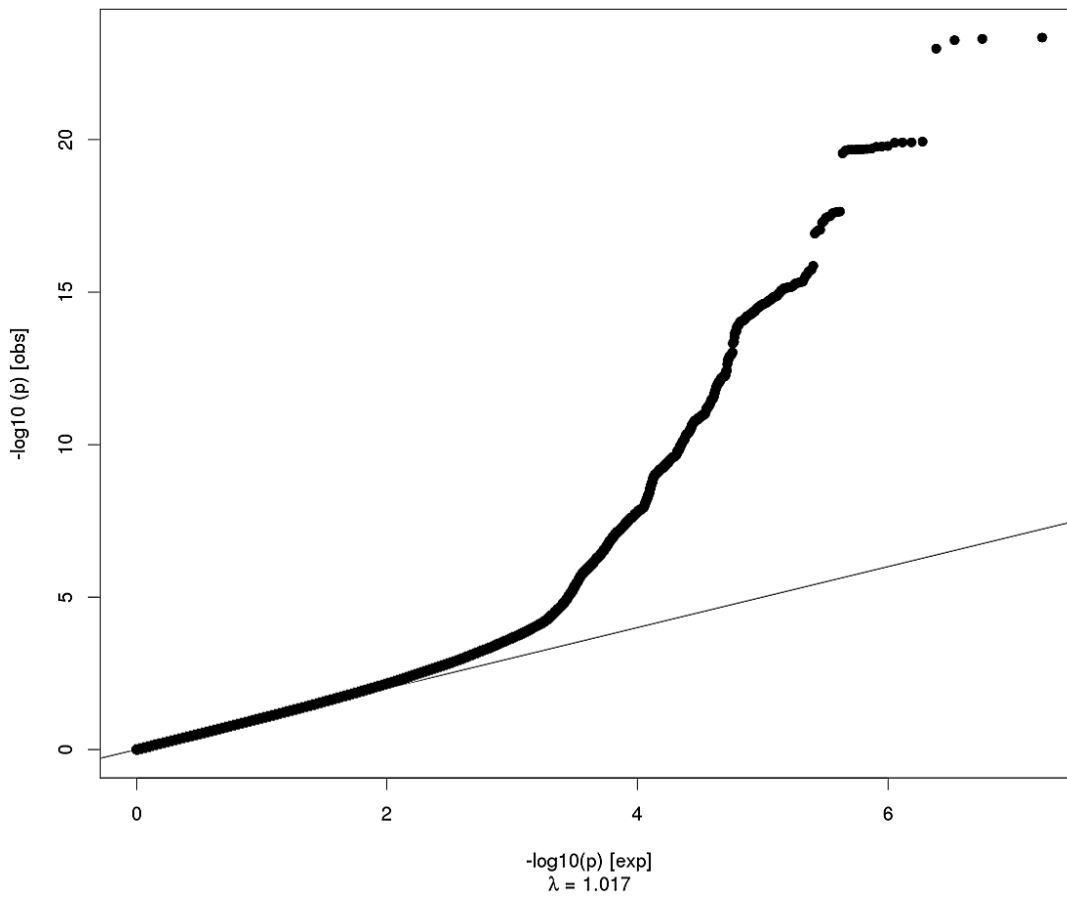

Pericalcarine Thickness

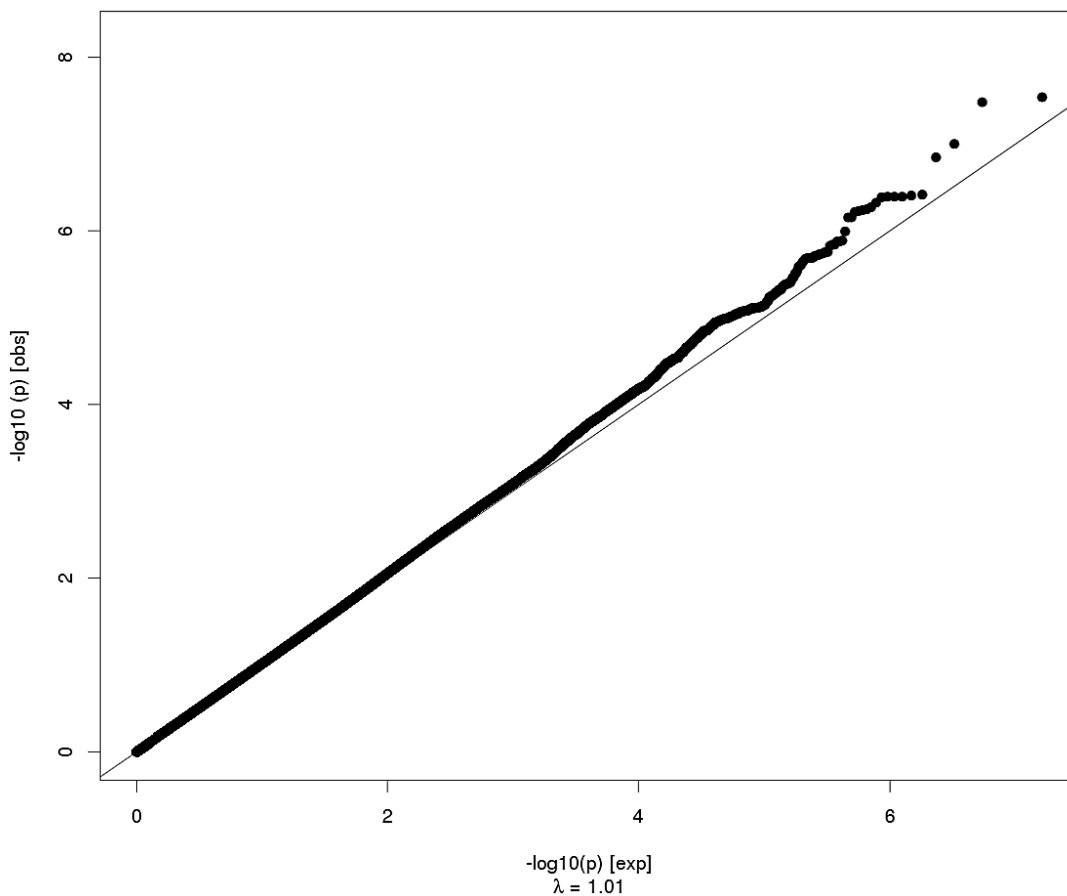

Cuneus Surface Area

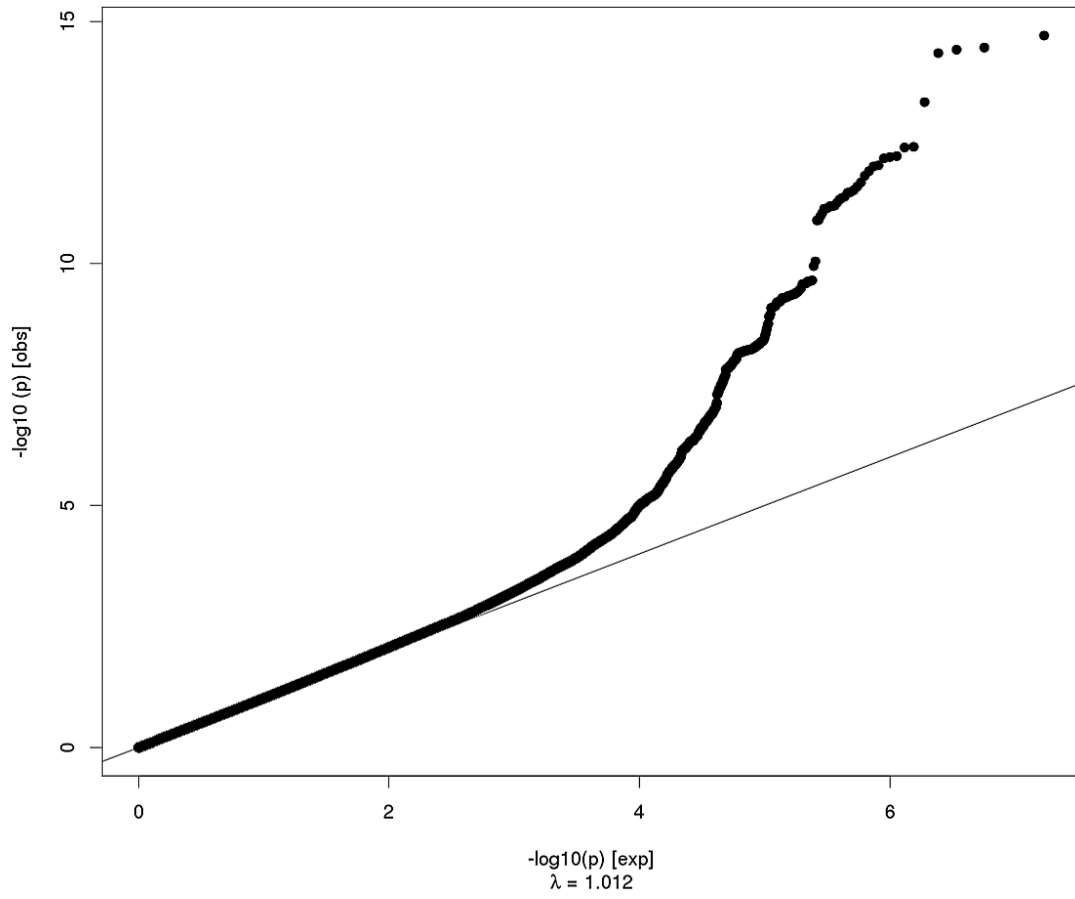

Cuneus Thickness

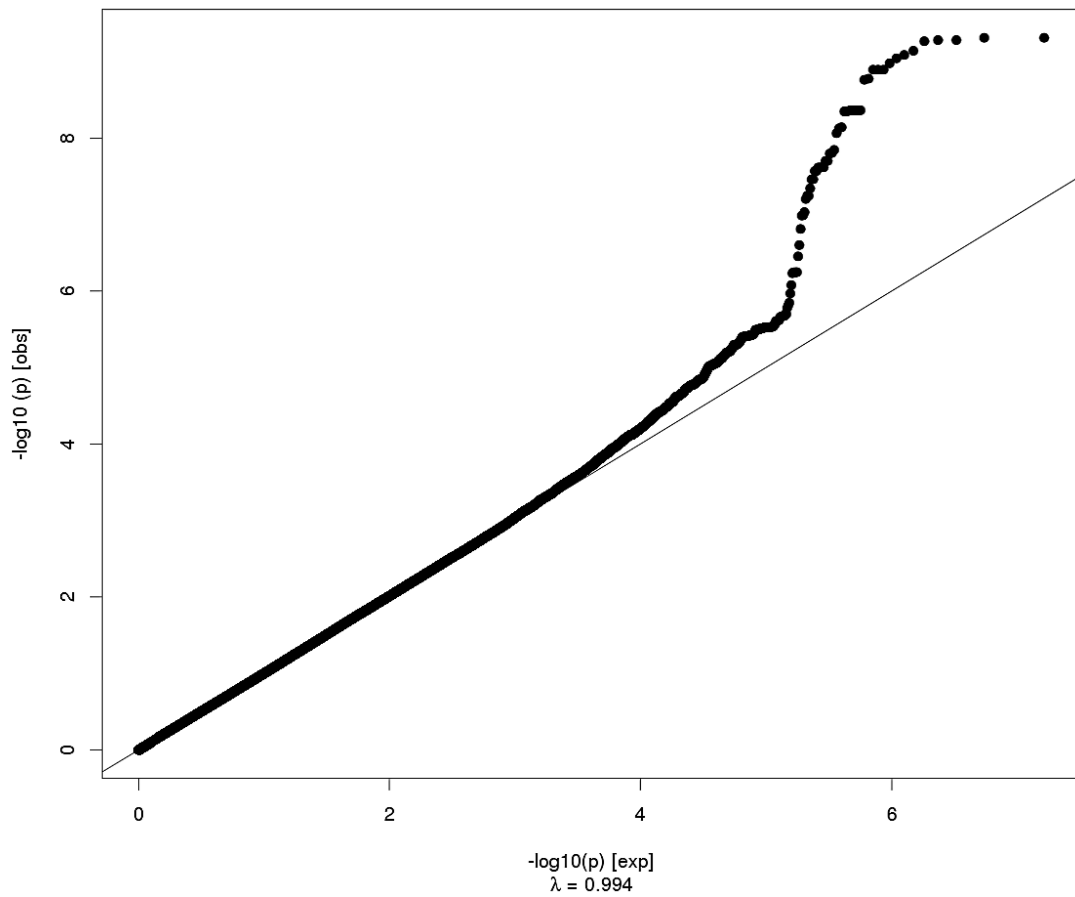

Lateral Occipital Surface Area

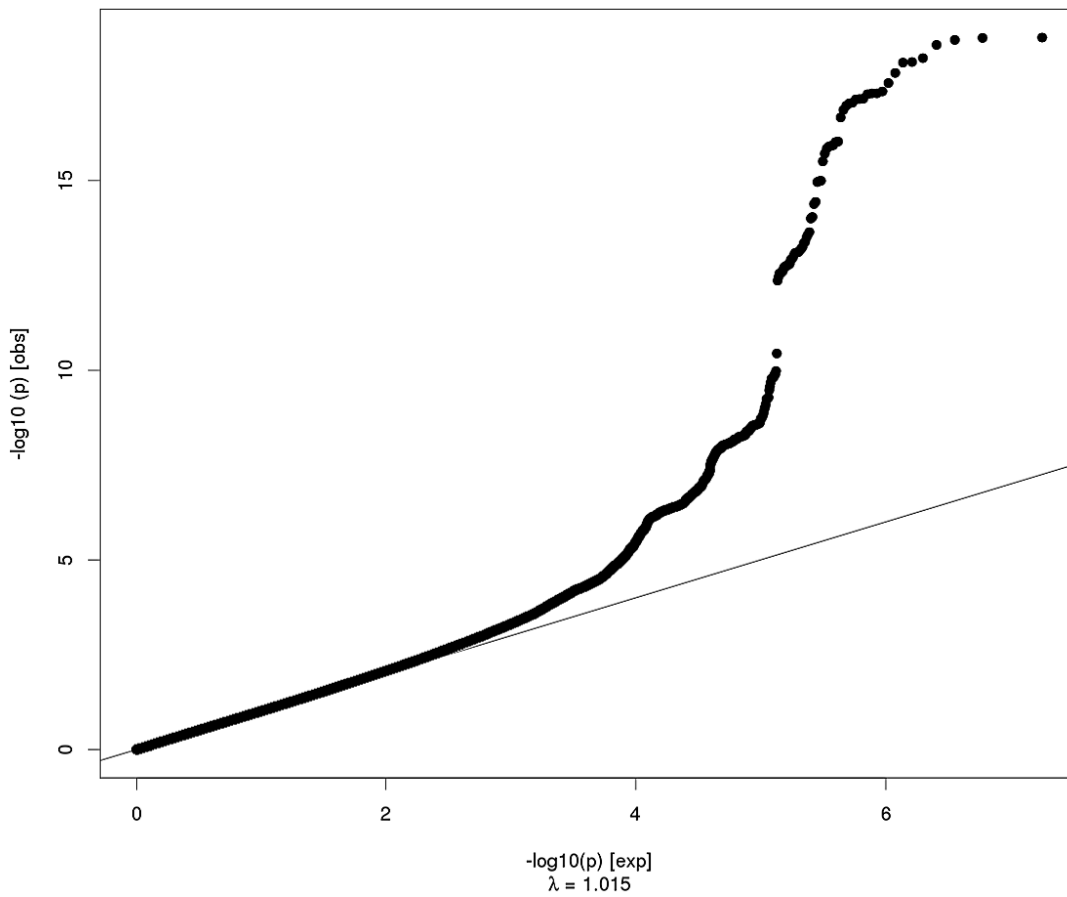

Lateral Occipital Thickness

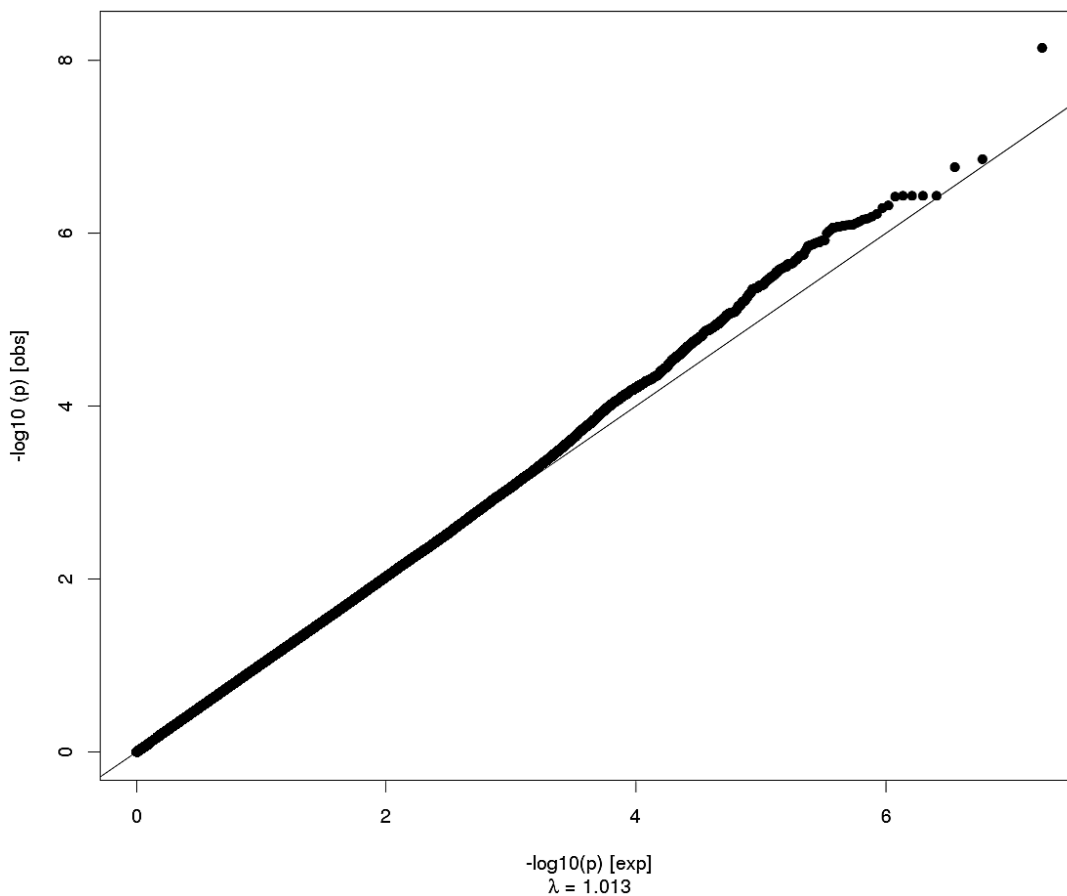

Supplement: Supplementary file [file 399402-10.pdf]
