# Supplementary material for: The genetic architecture of the human cerebral cortex
Source: bioRxiv or medRxiv preprint supplement (doi:10.1101/399402), 2019-07-18

## Locus zoom plots

| Locus# | Phenotype                               | Loci         | SNP         | Page |
|--------|-----------------------------------------|--------------|-------------|------|
| 1      | Total Surface Area                      | 3:28007315   | rs12630663  | 6    |
| 2      | Total Surface Area                      | 3:141721762  | rs34464850  | 7    |
| 3      | Total Surface Area                      | 5:170778824  | rs7715167   | 8    |
| 4      | Total Surface Area                      | 6:108926496  | rs2802295   | 9    |
| 5      | Total Surface Area                      | 6:126964510  | rs4273712   | 10   |
| 6      | Total Surface Area                      | 6:127052822  | rs190958130 | 11   |
| 7      | Total Surface Area                      | 10:21830104  | rs11012732  | 12   |
| 8      | Total Surface Area                      | 10:105012994 | rs1628768   | 13   |
| 9      | Total Surface Area                      | 12:56470625  | rs11171739  | 14   |
| 10     | Total Surface Area                      | 12:66327632  | rs10878349  | 15   |
| 11     | Total Surface Area                      | 17:43904528  | rs62057153  | 16   |
| 12     | Average Thickness                       | 2:27149258   | rs6738528   | 17   |
| 13     | Average Thickness                       | 2:98275354   | rs11692435  | 18   |
| 14     | Average Thickness                       | 3:39489619   | rs630934    | 19   |
| 15     | Average Thickness                       | 4:121643726  | rs13110077  | 20   |
| 16     | Average Thickness                       | 8:8189438    | rs2980497   | 21   |
| 17     | Average Thickness                       | 8:110585288  | rs7824177   | 22   |
| 18     | Average Thickness                       | 17:43927290  | rs17769552  | 23   |
| 19     | Frontal Pole Surface Area               | 2:188278203  | rs17464221  | 24   |
| 20     | Frontal Pole Surface Area               | 16:86088307  | rs113050298 | 25   |
| 21     | Lateral Orbitofrontal Surface Area      | 1:119799099  | rs7529542   | 26   |
| 22     | Lateral Orbitofrontal Surface Area      | 6:126760994  | rs2184968   | 27   |
| 23     | Lateral Orbitofrontal Surface Area      | 7:19626622   | rs4721802   | 28   |
| 24     | Lateral Orbitofrontal Surface Area      | 8:8975103    | rs1822951   | 29   |
| 25     | Lateral Orbitofrontal Surface Area      | 12:65905126  | rs79487293  | 30   |
| 26     | Lateral Orbitofrontal Surface Area      | 14:54724054  | rs2358483   | 31   |
| 27     | Lateral Orbitofrontal Surface Area      | 21:34298974  | rs12626790  | 32   |
| 28     | Rostral Anterior Cingulate Surface Area | 9:101633220  | rs7874287   | 33   |
| 29     | Rostral Anterior Cingulate Surface Area | 15:55983271  | rs1986012   | 34   |
| 30     | Rostral Anterior Cingulate Surface Area | 17:46584657  | rs2202895   | 35   |
| 31     | Rostral Anterior Cingulate Thickness    | 14:73319928  | rs4899448   | 36   |
| 32     | Rostral Anterior Cingulate Thickness    | 19:51621561  | rs62115964  | 37   |
| 33     | Caudal Anterior Cingulate Surface Area  | 2:162822709  | rs13021985  | 38   |
| 34     | Caudal Anterior Cingulate Surface Area  | 5:82843609   | rs7728751   | 39   |
| 35     | Caudal Anterior Cingulate Surface Area  | 16:60827388  | rs80241863  | 40   |
| 36     | Superior Frontal Surface Area           | 1:64235727   | rs4915928   | 41   |
| 37     | Superior Frontal Surface Area           | 6:126023555  | rs4492207   | 42   |
| 38     | Superior Frontal Surface Area           | 9:83480392   | rs76696867  | 43   |
| 39     | Superior Frontal Surface Area           | 12:79951566  | rs4842266   | 44   |
| 40     | Superior Frontal Thickness              | 16:2886967   | rs9929219   | 45   |
| 41     | Rostral Middle Frontal Surface Area     | 1:17311882   | rs6682671   | 46   |
| 42     | Rostral Middle Frontal Surface Area     | 2:188379320  | rs35612915  | 47   |
| 43     | Rostral Middle Frontal Surface Area     | 3:193536820  | rs1165645   | 48   |
| 44     | Rostral Middle Frontal Surface Area     | 5:94072933   | rs7731360   | 49   |
| 45     | Rostral Middle Frontal Surface Area     | 8:120596023  | rs10283100  | 50   |
| 46     | Rostral Middle Frontal Surface Area     | 11:65562257  | rs2276133   | 51   |
| 47     | Rostral Middle Frontal Surface Area     | 13:100825526 | rs4772268   | 52   |
| 48     | Rostral Middle Frontal Surface Area     | 14:99698931  | rs1257415   | 53   |
| 49     | Rostral Middle Frontal Surface Area     | 15:39634222  | rs1080066   | 54   |
| 50     | Rostral Middle Frontal Surface Area     | 16:65014909  | rs40115     | 55   |
| 51     | Rostral Middle Frontal Thickness        | 1:247527168  | rs6671321   | 56   |
| 52     | Rostral Middle Frontal Thickness        | 3:55067916   | rs5008703   | 57   |
| 53     | Pars Orbitalis Surface Area             | 1:119642296  | rs12064109  | 58   |
| 54     | Pars Orbitalis Surface Area             | 2:65971597   | rs2287283   | 59   |
| 55     | Pars Orbitalis Surface Area             | 3:88380871   | rs6551313   | 60   |
| 56     | Pars Orbitalis Surface Area             | 3:98722159   | rs2262601   | 61   |
| 57     | Pars Orbitalis Surface Area             | 11:92348702  | rs61901866  | 62   |
| 58     | Pars Orbitalis Surface Area             | 14:54777745  | rs7147119   | 63   |
| 59     | Pars Triangularis Surface Area          | 2:65971597   | rs2287283   | 64   |
| 60     | Pars Triangularis Surface Area          | 3:147106319  | rs2279829   | 65   |

| <b>Locus#</b> | <b>Phenotype</b>                   | <b>Loci</b>  | <b>SNP</b>  | <b>Page</b> |
|---------------|------------------------------------|--------------|-------------|-------------|
| 61            | Pars Triangularis Surface Area     | 7:96202718   | rs10278627  | 66          |
| 62            | Pars Triangularis Surface Area     | 11:111050526 | rs59614433  | 67          |
| 63            | Pars Triangularis Surface Area     | 13:81198667  | rs7996803   | 68          |
| 64            | Pars Triangularis Surface Area     | 15:39639898  | rs4924345   | 69          |
| 65            | Pars Triangularis Surface Area     | 19:30855651  | rs1125867   | 70          |
| 66            | Pars Opercularis Surface Area      | 6:126090277  | rs1159974   | 71          |
| 67            | Pars Opercularis Surface Area      | 15:39633904  | rs2033939   | 72          |
| 68            | Pars Opercularis Surface Area      | 17:13054525  | rs12938190  | 73          |
| 69            | Pars Opercularis Thickness         | 3:141658316  | rs7628850   | 74          |
| 70            | Caudal Middle Frontal Surface Area | 2:65948094   | rs7580807   | 75          |
| 71            | Caudal Middle Frontal Surface Area | 3:193549449  | rs655045    | 76          |
| 72            | Caudal Middle Frontal Surface Area | 5:129018314  | rs30641     | 77          |
| 73            | Caudal Middle Frontal Surface Area | 6:92002653   | rs9345125   | 78          |
| 74            | Caudal Middle Frontal Surface Area | 6:126964510  | rs4273712   | 79          |
| 75            | Caudal Middle Frontal Surface Area | 16:52538337  | rs7184835   | 80          |
| 76            | Caudal Middle Frontal Surface Area | 18:52918717  | rs1893430   | 81          |
| 77            | Caudal Middle Frontal Thickness    | 5:171928642  | rs62385486  | 82          |
| 78            | Paracentral Surface Area           | 10:33539487  | rs2269084   | 83          |
| 79            | Paracentral Surface Area           | 12:27792335  | rs7303526   | 84          |
| 80            | Paracentral Surface Area           | 12:106476805 | rs12146713  | 85          |
| 81            | Precentral Surface Area            | 5:92950673   | rs10064431  | 86          |
| 82            | Precentral Surface Area            | 6:92009596   | rs4706392   | 87          |
| 83            | Precentral Surface Area            | 10:118777633 | rs11197866  | 88          |
| 84            | Precentral Surface Area            | 15:39111663  | rs17601140  | 89          |
| 85            | Precentral Surface Area            | 15:39343032  | rs11070172  | 90          |
| 86            | Precentral Surface Area            | 15:39604340  | rs3862145   | 91          |
| 87            | Precentral Surface Area            | 15:39634222  | rs1080066   | 92          |
| 88            | Precentral Thickness               | 7:45582776   | rs4724413   | 93          |
| 89            | Postcentral Surface Area           | 3:147106319  | rs2279829   | 94          |
| 90            | Postcentral Surface Area           | 4:127537734  | rs313135    | 95          |
| 91            | Postcentral Surface Area           | 5:93347836   | rs34322452  | 96          |
| 92            | Postcentral Surface Area           | 9:76157130   | rs11789773  | 97          |
| 93            | Postcentral Surface Area           | 11:37001542  | rs11033898  | 98          |
| 94            | Postcentral Surface Area           | 15:39604340  | rs3862145   | 99          |
| 95            | Postcentral Surface Area           | 15:39639992  | rs4924346   | 100         |
| 96            | Postcentral Surface Area           | 19:32204489  | rs117623407 | 101         |
| 97            | Postcentral Thickness              | 15:39631771  | rs11639391  | 102         |
| 98            | Postcentral Thickness              | 18:22234304  | rs12958970  | 103         |
| 99            | Postcentral Thickness              | 22:47200353  | rs4823877   | 104         |
| 100           | Precuneus Surface Area             | 1:87873700   | rs59373415  | 105         |
| 101           | Precuneus Surface Area             | 2:37748367   | rs7559976   | 106         |
| 102           | Precuneus Surface Area             | 3:190657360  | rs905124    | 107         |
| 103           | Precuneus Surface Area             | 5:92186429   | rs888814    | 108         |
| 104           | Precuneus Surface Area             | 6:138868516  | rs9399245   | 109         |
| 105           | Precuneus Surface Area             | 10:118715399 | rs7902527   | 110         |
| 106           | Precuneus Surface Area             | 14:59625997  | rs73313052  | 111         |
| 107           | Precuneus Thickness                | 1:47984143   | rs12118339  | 112         |
| 108           | Superior Parietal Surface Area     | 2:4554304    | rs639016    | 113         |
| 109           | Superior Parietal Surface Area     | 2:54615325   | rs79272390  | 114         |
| 110           | Superior Parietal Surface Area     | 3:71557865   | rs17718831  | 115         |
| 111           | Superior Parietal Surface Area     | 4:53702875   | rs6554054   | 116         |
| 112           | Superior Parietal Surface Area     | 4:113416783  | rs6840242   | 117         |
| 113           | Superior Parietal Surface Area     | 5:60344744   | rs40084     | 118         |
| 114           | Superior Parietal Surface Area     | 5:92797166   | rs115877304 | 119         |
| 115           | Superior Parietal Surface Area     | 5:92948485   | rs114489117 | 120         |
| 116           | Superior Parietal Surface Area     | 6:92002653   | rs9345125   | 121         |
| 117           | Superior Parietal Surface Area     | 8:41169496   | rs10109434  | 122         |
| 118           | Superior Parietal Surface Area     | 12:6545417   | rs7980991   | 123         |
| 119           | Superior Parietal Surface Area     | 15:39639898  | rs4924345   | 124         |
| 120           | Superior Parietal Surface Area     | 19:13109763  | rs68175985  | 125         |
| 121           | Superior Parietal Surface Area     | 20:52447303  | rs6022786   | 126         |
| 122           | Superior Parietal Thickness        | 7:120721087  | rs73215353  | 127         |



| <b>Locus#</b> | <b>Phenotype</b>                                   | <b>Loci</b>  | <b>SNP</b>  | <b>Page</b> |
|---------------|----------------------------------------------------|--------------|-------------|-------------|
| 123           | Superior Parietal Thickness                        | 9:113656865  | rs1326892   | 128         |
| 124           | Superior Parietal Thickness                        | 16:87229318  | rs7203251   | 129         |
| 125           | Supramarginal Surface Area                         | 3:147106319  | rs2279829   | 130         |
| 126           | Supramarginal Surface Area                         | 4:53738411   | rs2200225   | 131         |
| 127           | Supramarginal Surface Area                         | 14:59069053  | rs221326    | 132         |
| 128           | Supramarginal Surface Area                         | 14:59627631  | rs2164950   | 133         |
| 129           | Supramarginal Surface Area                         | 15:39081795  | rs62007727  | 134         |
| 130           | Supramarginal Surface Area                         | 15:39639898  | rs4924345   | 135         |
| 131           | Supramarginal Surface Area                         | 15:39720600  | rs78502100  | 136         |
| 132           | Inferior Parietal Surface Area                     | 1:88423397   | rs1413536   | 137         |
| 133           | Inferior Parietal Surface Area                     | 2:4554304    | rs639016    | 138         |
| 134           | Inferior Parietal Surface Area                     | 2:54615325   | rs79272390  | 139         |
| 135           | Inferior Parietal Surface Area                     | 3:104693252  | rs13319705  | 140         |
| 136           | Inferior Parietal Surface Area                     | 4:145381766  | rs17019370  | 141         |
| 137           | Inferior Parietal Surface Area                     | 5:92134273   | rs27540     | 142         |
| 138           | Inferior Parietal Surface Area                     | 5:128971797  | rs62399042  | 143         |
| 139           | Inferior Parietal Surface Area                     | 12:65797106  | rs2336714   | 144         |
| 140           | Inferior Parietal Surface Area                     | 19:13109763  | rs68175985  | 145         |
| 141           | Inferior Parietal Surface Area                     | 20:52432451  | rs4437022   | 146         |
| 142           | Posterior Cingulate Surface Area                   | 1:87630392   | rs11161942  | 147         |
| 143           | Posterior Cingulate Surface Area                   | 2:37175444   | rs11695609  | 148         |
| 144           | Posterior Cingulate Surface Area                   | 5:66155020   | rs72761270  | 149         |
| 145           | Posterior Cingulate Surface Area                   | 10:126486443 | rs12764880  | 150         |
| 146           | Isthmus Cingulate Surface Area                     | 2:37150793   | rs3770776   | 151         |
| 147           | Isthmus Cingulate Surface Area                     | 12:78241285  | rs1123680   | 152         |
| 148           | Isthmus Cingulate Thickness                        | 10:126551900 | rs2559509   | 153         |
| 149           | Insula Surface Area                                | 5:82843609   | rs7728751   | 154         |
| 150           | Insula Surface Area                                | 10:118752250 | rs1122688   | 155         |
| 151           | Insula Surface Area                                | 11:111056158 | rs58066679  | 156         |
| 152           | Insula Surface Area                                | 17:28275095  | rs6505147   | 157         |
| 153           | Entorhinal Surface Area                            | 1:178740427  | rs6693283   | 158         |
| 154           | Entorhinal Surface Area                            | 5:81882571   | rs4147321   | 159         |
| 155           | Entorhinal Surface Area                            | 14:59860705  | rs7141150   | 160         |
| 156           | Entorhinal Thickness                               | 12:94559713  | rs2885259   | 161         |
| 157           | Parahippocampal Surface Area                       | 5:82350191   | rs27493     | 162         |
| 158           | Parahippocampal Surface Area                       | 6:126964510  | rs4273712   | 163         |
| 159           | Parahippocampal Surface Area                       | 11:92319654  | rs1792354   | 164         |
| 160           | Parahippocampal Thickness                          | 9:98278644   | rs28591501  | 165         |
| 161           | Fusiform Surface Area                              | 1:47974123   | rs61784835  | 166         |
| 162           | Fusiform Surface Area                              | 5:56082094   | rs10940512  | 167         |
| 163           | Fusiform Surface Area                              | 11:110962056 | rs7123402   | 168         |
| 164           | Fusiform Surface Area                              | 14:59827306  | rs17834032  | 169         |
| 165           | Fusiform Surface Area                              | 17:44865439  | rs2074404   | 170         |
| 166           | Temporal Pole Surface Area                         | 4:103112470  | rs6855246   | 171         |
| 167           | Inferior Temporal Surface Area                     | 2:37899310   | rs9309013   | 172         |
| 168           | Inferior Temporal Surface Area                     | 19:13165884  | rs73006837  | 173         |
| 169           | Middle Temporal Surface Area                       | 2:237708487  | rs1344762   | 174         |
| 170           | Middle Temporal Surface Area                       | 5:93385558   | rs141834426 | 175         |
| 171           | Middle Temporal Surface Area                       | 5:93557702   | rs17376456  | 176         |
| 172           | Middle Temporal Surface Area                       | 5:106924829  | rs9328010   | 177         |
| 173           | Middle Temporal Surface Area                       | 19:13109955  | rs73006822  | 178         |
| 174           | Middle Temporal Thickness                          | 14:59074136  | rs160459    | 179         |
| 175           | Superior Temporal Surface Area                     | 2:48277490   | rs7601767   | 180         |
| 176           | Superior Temporal Surface Area                     | 2:149994571  | rs13011264  | 181         |
| 177           | Superior Temporal Surface Area                     | 8:8605632    | rs4841029   | 182         |
| 178           | Superior Temporal Surface Area                     | 15:39809640  | rs115241741 | 183         |
| 179           | Superior Temporal Thickness                        | 1:47980916   | rs6658111   | 184         |
| 180           | Superior Temporal Thickness                        | 3:48753149   | rs9848203   | 185         |
| 181           | Banks of the Superior Temporal Sulcus Surface Area | 9:126603989  | rs7862092   | 186         |
| 182           | Banks of the Superior Temporal Sulcus Surface Area | 14:59074878  | rs160458    | 187         |

| <b>Locus#</b> | <b>Phenotype</b>                                   | <b>Loci</b>  | <b>SNP</b>  | <b>Page</b> |
|---------------|----------------------------------------------------|--------------|-------------|-------------|
| 183           | Banks of the Superior Temporal Sulcus Surface Area | 19:13109955  | rs73006822  | 188         |
| 184           | Banks of the Superior Temporal Sulcus Thickness    | 14:59071725  | rs149142    | 189         |
| 185           | Transverse Temporal Surface Area                   | 2:150037201  | rs11684511  | 190         |
| 186           | Transverse Temporal Surface Area                   | 5:93509229   | rs115840240 | 191         |
| 187           | Transverse Temporal Surface Area                   | 5:131341541  | rs7714191   | 192         |
| 188           | Transverse Temporal Surface Area                   | 6:18503847   | rs72834200  | 193         |
| 189           | Transverse Temporal Surface Area                   | 6:92009564   | rs4706391   | 194         |
| 190           | Transverse Temporal Surface Area                   | 8:10943276   | rs2409691   | 195         |
| 191           | Transverse Temporal Surface Area                   | 15:39662277  | rs4923822   | 196         |
| 192           | Transverse Temporal Surface Area                   | 22:46760481  | rs9615351   | 197         |
| 193           | Transverse Temporal Thickness                      | 4:35449515   | rs57125540  | 198         |
| 194           | Lingual Surface Area                               | 1:18962095   | rs1934057   | 199         |
| 195           | Lingual Surface Area                               | 1:93034023   | rs1556562   | 200         |
| 196           | Lingual Surface Area                               | 1:113063125  | rs910697    | 201         |
| 197           | Lingual Surface Area                               | 2:162868858  | rs1014444   | 202         |
| 198           | Lingual Surface Area                               | 3:104656715  | rs2118004   | 203         |
| 199           | Lingual Surface Area                               | 3:146993779  | rs61508189  | 204         |
| 200           | Lingual Surface Area                               | 4:1002448    | rs6812278   | 205         |
| 201           | Lingual Surface Area                               | 5:60307904   | rs17419290  | 206         |
| 202           | Lingual Surface Area                               | 6:127096181  | rs9401907   | 207         |
| 203           | Lingual Surface Area                               | 7:18915559   | rs10237366  | 208         |
| 204           | Lingual Surface Area                               | 7:107237807  | rs7809950   | 209         |
| 205           | Lingual Surface Area                               | 9:98276371   | rs28410513  | 210         |
| 206           | Lingual Surface Area                               | 10:104422321 | rs7914158   | 211         |
| 207           | Lingual Surface Area                               | 11:30819811  | rs2022130   | 212         |
| 208           | Lingual Surface Area                               | 13:80192906  | rs9545158   | 213         |
| 209           | Lingual Surface Area                               | 14:54316424  | rs10431624  | 214         |
| 210           | Lingual Surface Area                               | 14:59628609  | rs74826997  | 215         |
| 211           | Lingual Surface Area                               | 17:43931626  | rs17690987  | 216         |
| 212           | Lingual Thickness                                  | 2:49391013   | rs10495963  | 217         |
| 213           | Pericalcarine Surface Area                         | 1:113239478  | rs2999158   | 218         |
| 214           | Pericalcarine Surface Area                         | 2:162901327  | rs16822665  | 219         |
| 215           | Pericalcarine Surface Area                         | 3:104724787  | rs971550    | 220         |
| 216           | Pericalcarine Surface Area                         | 3:118990416  | rs139834736 | 221         |
| 217           | Pericalcarine Surface Area                         | 4:1002448    | rs6812278   | 222         |
| 218           | Pericalcarine Surface Area                         | 4:19095652   | rs13115025  | 223         |
| 219           | Pericalcarine Surface Area                         | 4:145291206  | rs4465995   | 224         |
| 220           | Pericalcarine Surface Area                         | 5:60499185   | rs194369    | 225         |
| 221           | Pericalcarine Surface Area                         | 5:124260718  | rs57063427  | 226         |
| 222           | Pericalcarine Surface Area                         | 6:126666648  | rs117892760 | 227         |
| 223           | Pericalcarine Surface Area                         | 6:138865324  | rs4895532   | 228         |
| 224           | Pericalcarine Surface Area                         | 7:18915559   | rs10237366  | 229         |
| 225           | Pericalcarine Surface Area                         | 11:12071855  | rs10765918  | 230         |
| 226           | Pericalcarine Surface Area                         | 11:31499705  | rs1223090   | 231         |
| 227           | Pericalcarine Surface Area                         | 12:5314508   | rs17179798  | 232         |
| 228           | Pericalcarine Surface Area                         | 13:80192906  | rs9545158   | 233         |
| 229           | Pericalcarine Surface Area                         | 14:29228427  | rs35342371  | 234         |
| 230           | Pericalcarine Surface Area                         | 14:59625997  | rs73313052  | 235         |
| 231           | Pericalcarine Surface Area                         | 16:28917644  | rs7188071   | 236         |
| 232           | Pericalcarine Surface Area                         | 17:42239561  | rs13726     | 237         |
| 233           | Pericalcarine Surface Area                         | 17:63914750  | rs1420791   | 238         |
| 234           | Pericalcarine Surface Area                         | 20:52468966  | rs4811476   | 239         |
| 235           | Pericalcarine Thickness                            | 14:59605116  | rs117461235 | 240         |
| 236           | Cuneus Surface Area                                | 2:204473751  | rs7585601   | 241         |
| 237           | Cuneus Surface Area                                | 3:104647183  | rs4895120   | 242         |
| 238           | Cuneus Surface Area                                | 6:126613946  | rs76470478  | 243         |
| 239           | Cuneus Surface Area                                | 7:18877408   | rs957960    | 244         |
| 240           | Cuneus Surface Area                                | 11:12071855  | rs10765918  | 245         |
| 241           | Cuneus Surface Area                                | 14:59064739  | rs170239    | 246         |
| 242           | Cuneus Surface Area                                | 14:59625997  | rs73313052  | 247         |

| <b>Locus#</b> | <b>Phenotype</b>               | <b>Loci</b> | <b>SNP</b> | <b>Page</b> |
|---------------|--------------------------------|-------------|------------|-------------|
| 243           | Cuneus Surface Area            | 17:63912574 | rs11652557 | 248         |
| 244           | Cuneus Thickness               | 14:59610076 | rs78580207 | 249         |
| 245           | Lateral Occipital Surface Area | 2:45170153  | rs4953152  | 250         |
| 246           | Lateral Occipital Surface Area | 3:104678133 | rs9863836  | 251         |
| 247           | Lateral Occipital Surface Area | 3:119001407 | rs9813454  | 252         |
| 248           | Lateral Occipital Surface Area | 3:177295215 | rs552305   | 253         |
| 249           | Lateral Occipital Surface Area | 6:127096181 | rs9401907  | 254         |
| 250           | Lateral Occipital Surface Area | 9:98257842  | rs28504650 | 255         |
| 251           | Lateral Occipital Surface Area | 14:59628609 | rs74826997 | 256         |

# Total Surface Area SA: rs12630663

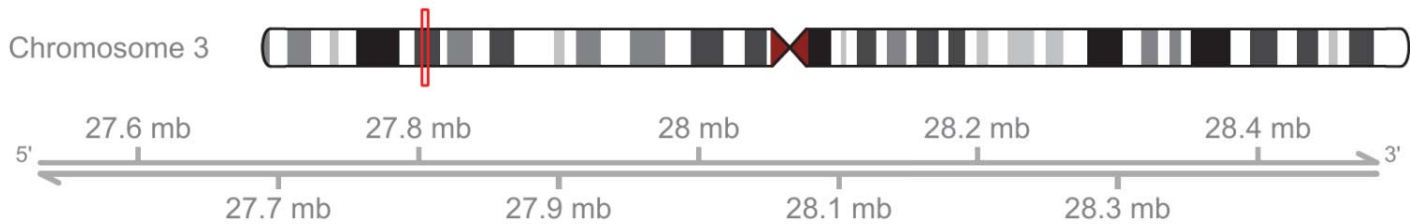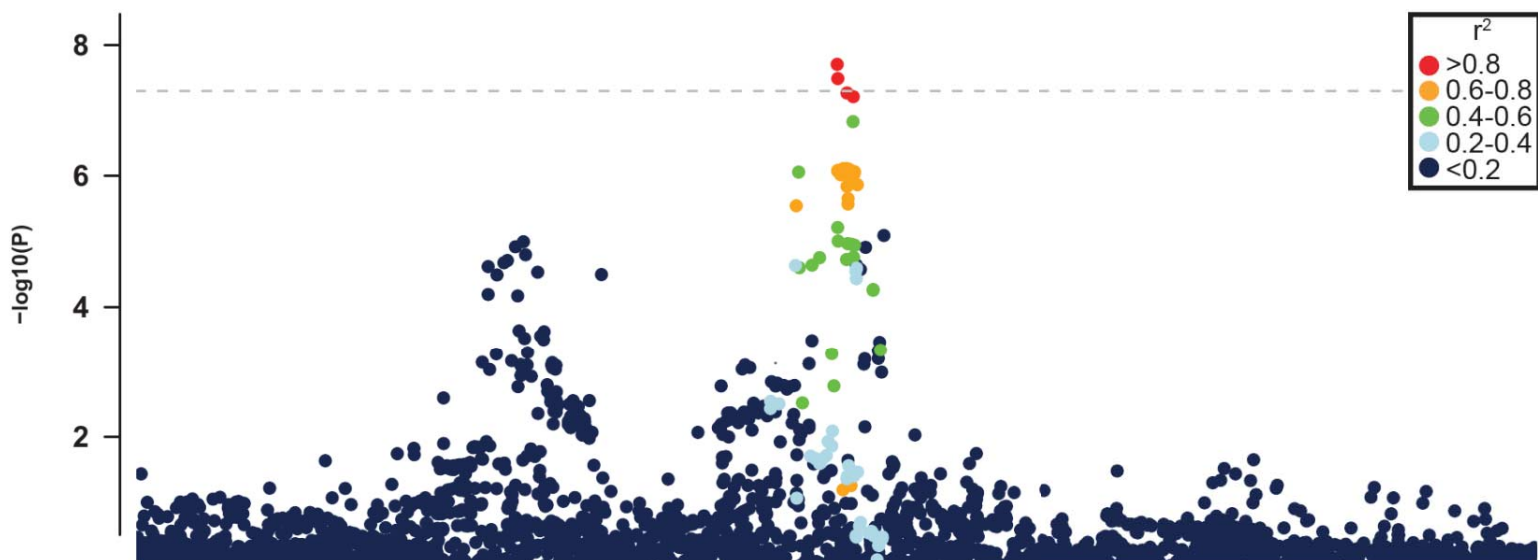

← SLC4A7

EOMES

CMC1

AZI2

→

GZ>CP

CP>GZ

Corrected for total SA

Uncorrected

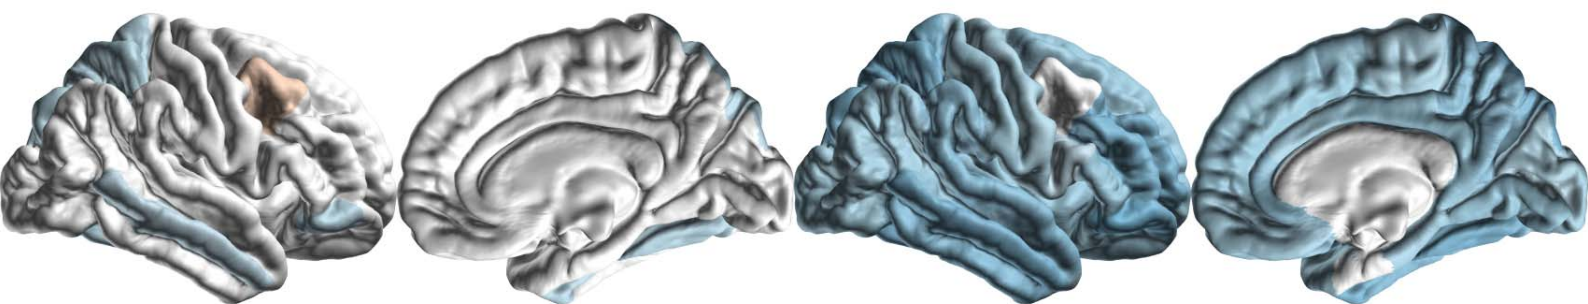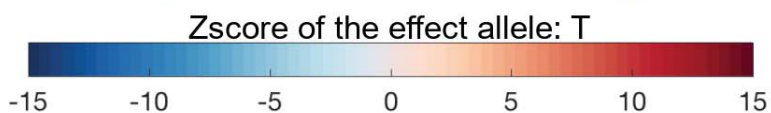

Total Surface Area SA: rs34464850

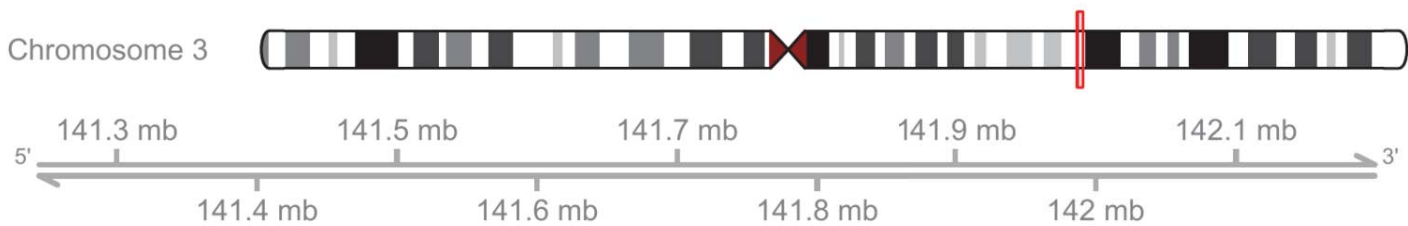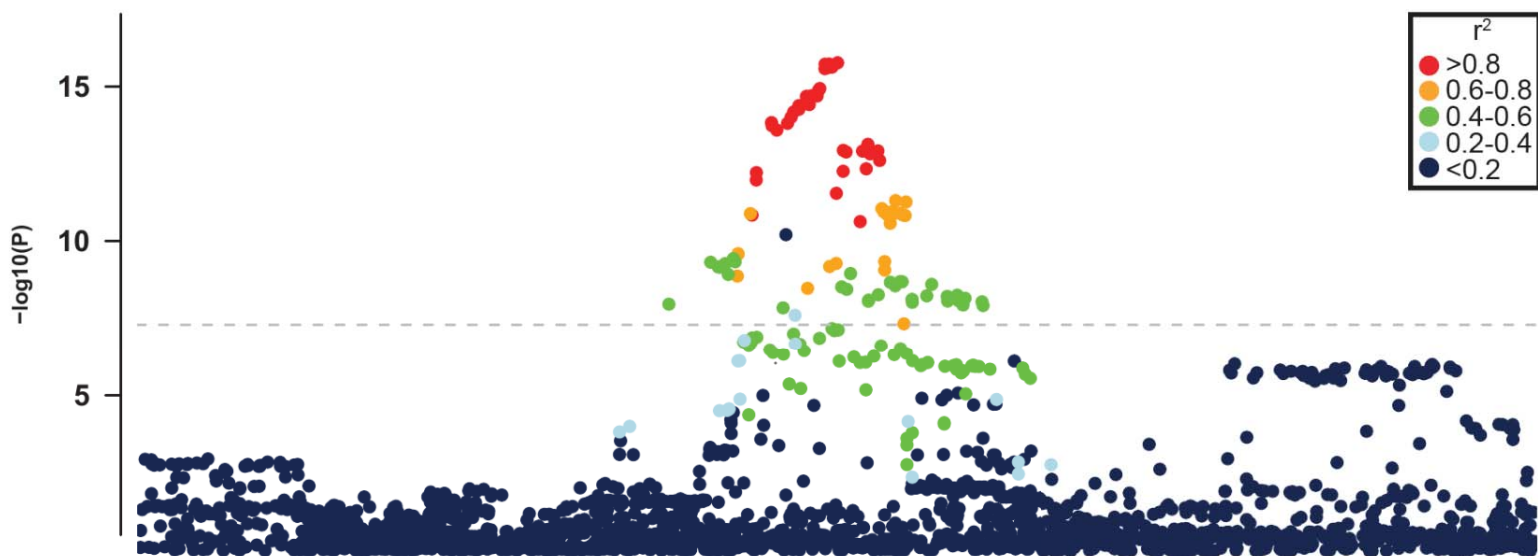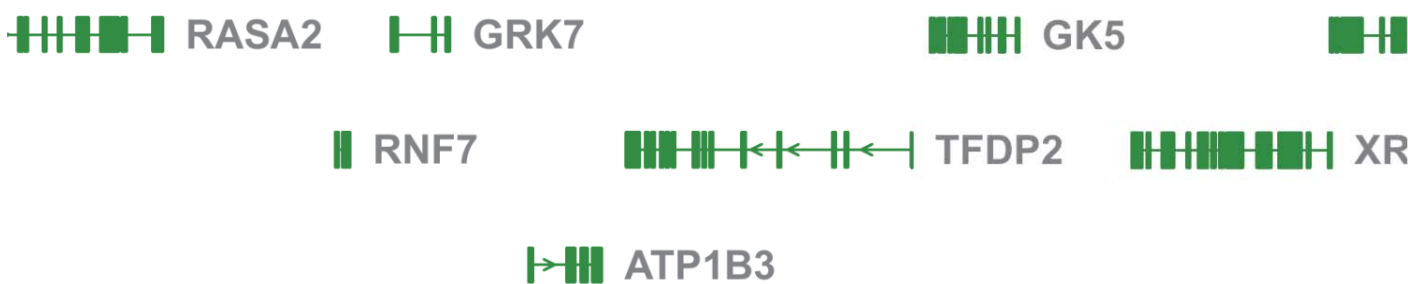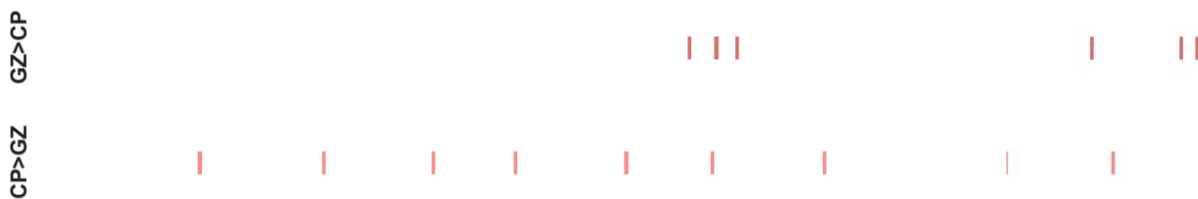

Corrected for total SA

Uncorrected

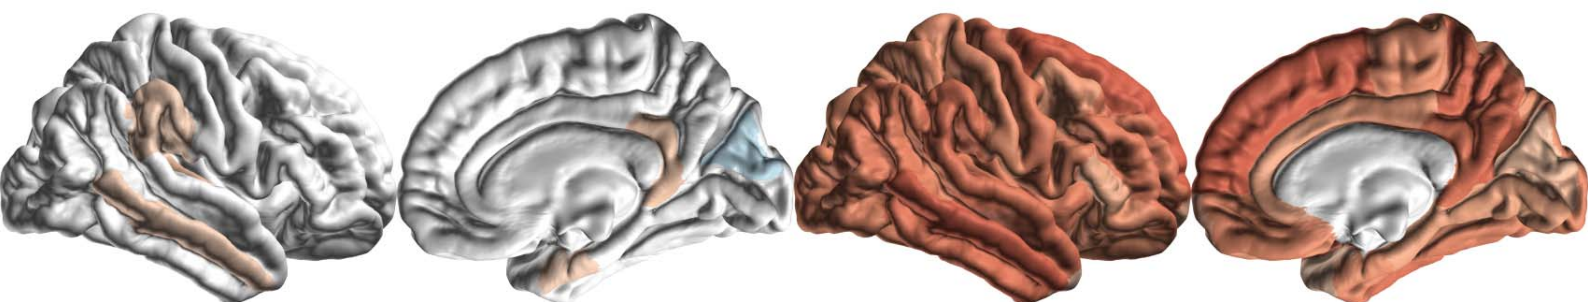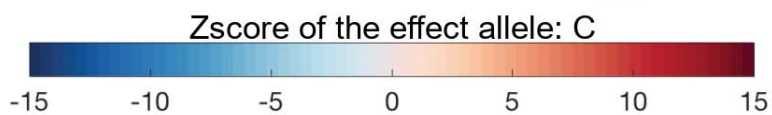



# Total Surface Area SA: rs7715167

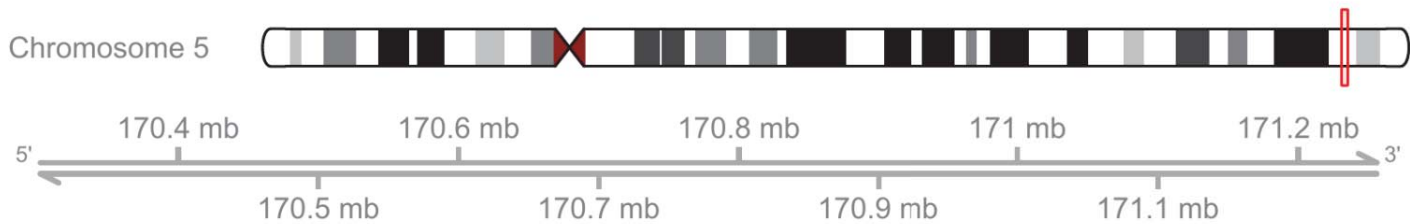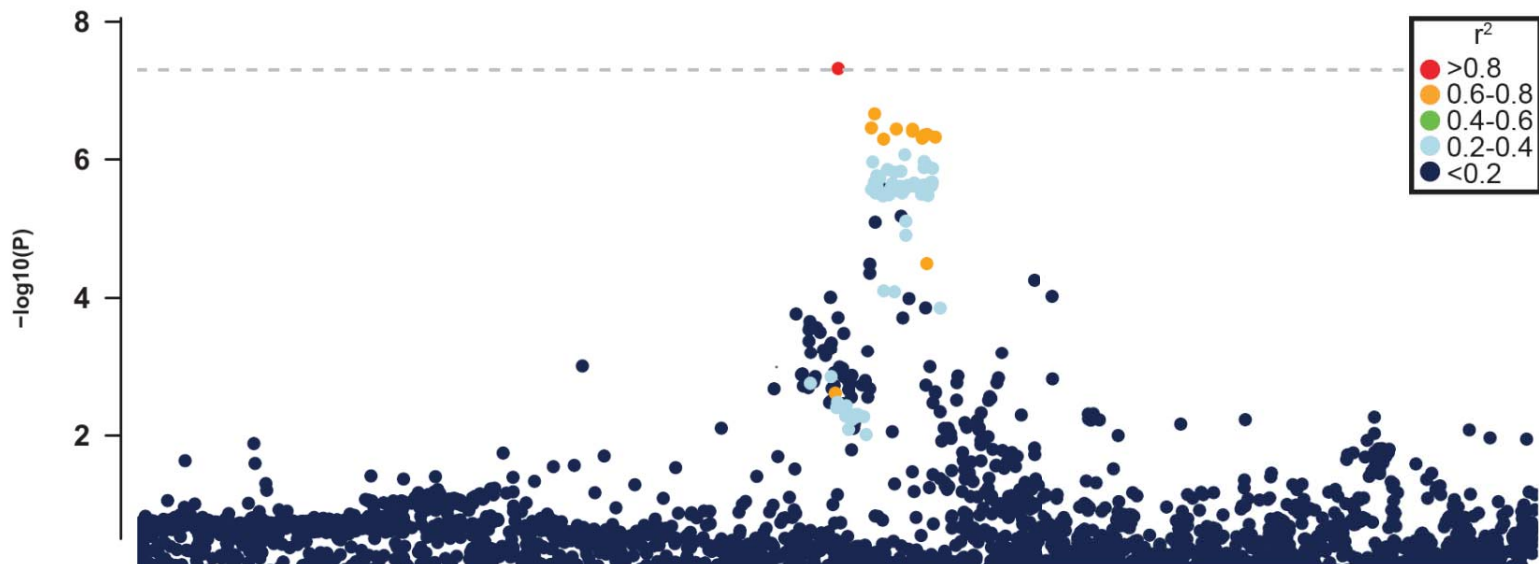

RANBP17

TLX3 FGF18

NPM1

GZ>CP

CP>GZ

Corrected for total SA

Uncorrected

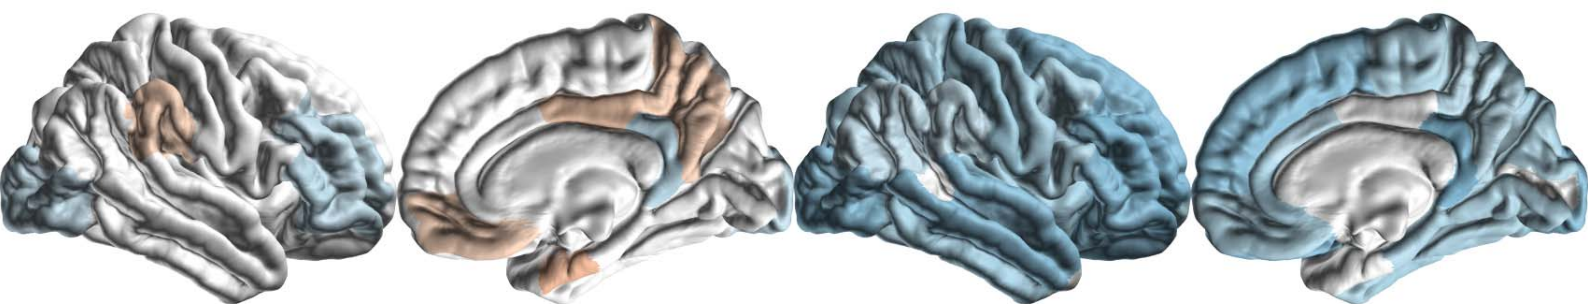

Zscore of the effect allele: T

-15 -10 -5 0 5 10 15

# Total Surface Area SA: rs2802295

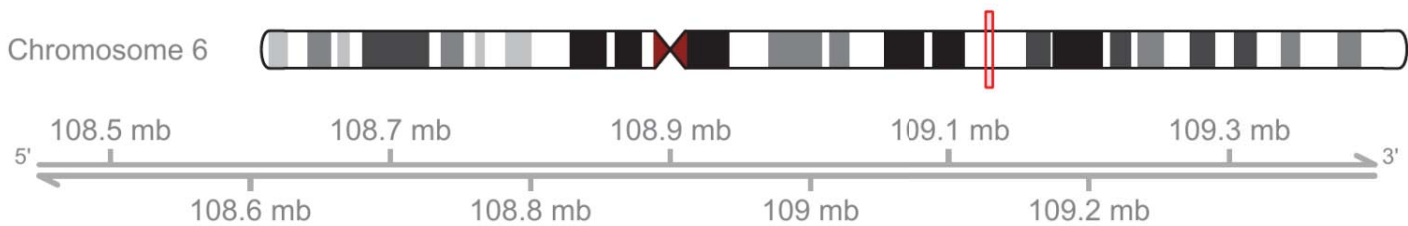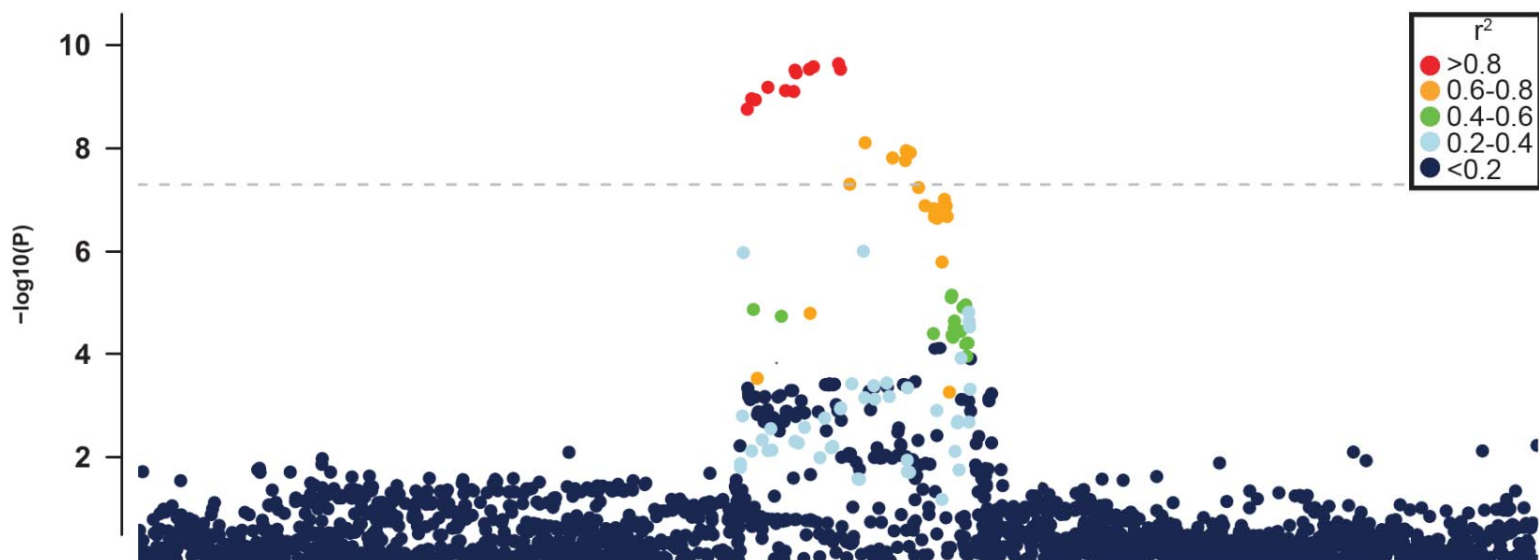

NR2E1

FOXO3

ARMC2

SNX3

LACE1

GZ>CP

CP>GZ

Corrected for total SA

Uncorrected

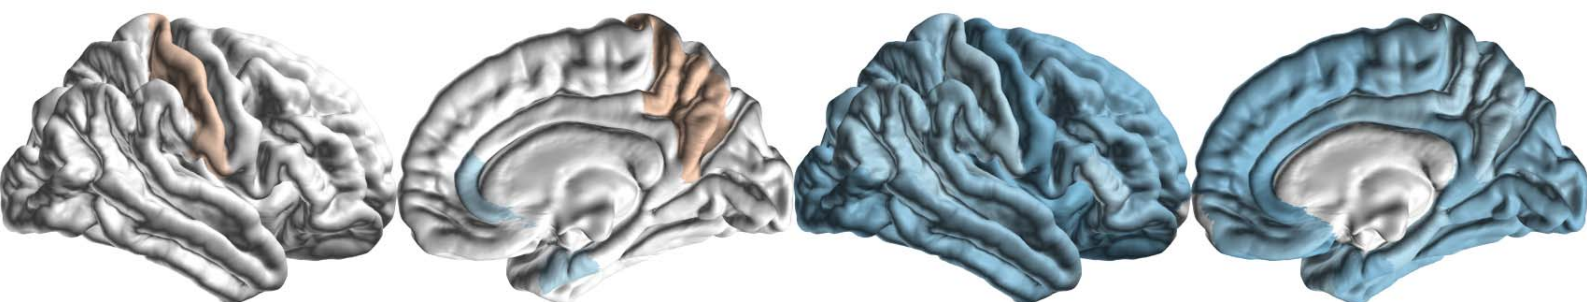

Zscore of the effect allele: A

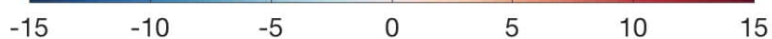

# Total Surface Area SA: rs4273712

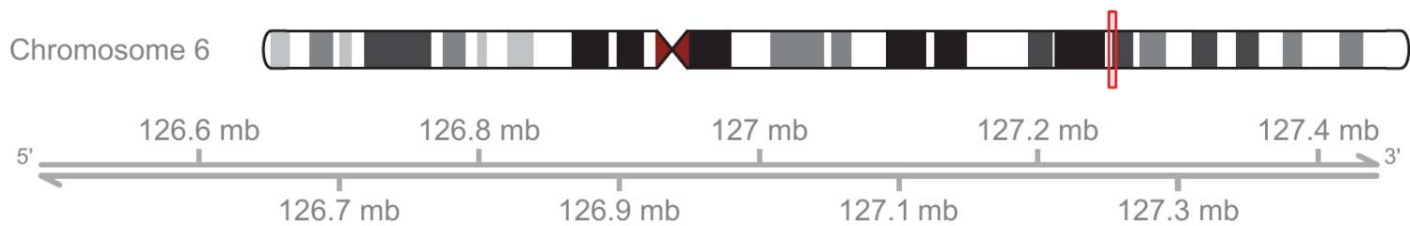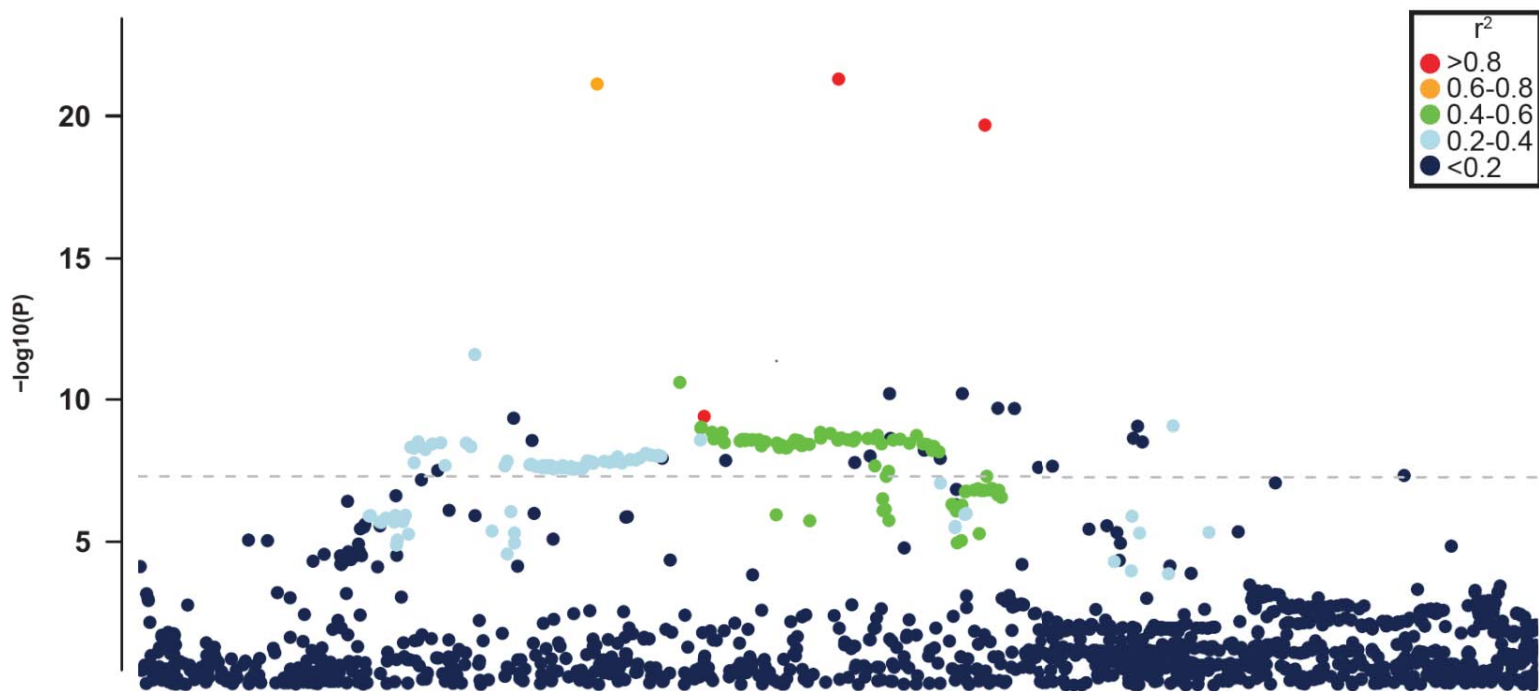

CENPW

GZ>CP

CP>GZ

Corrected for total SA

Uncorrected

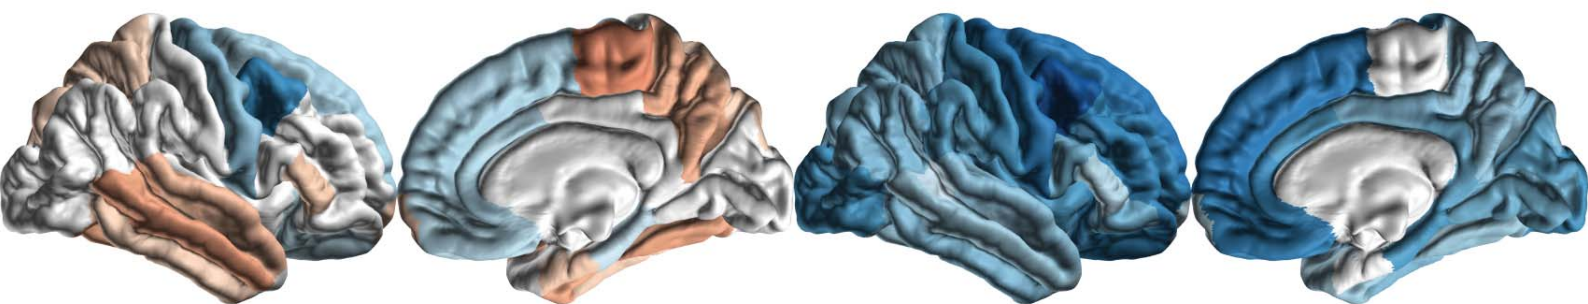

Zscore of the effect allele: A

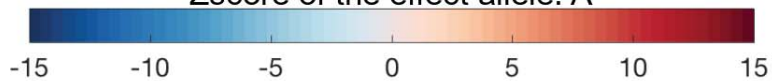



# Total Surface Area SA: rs190958130

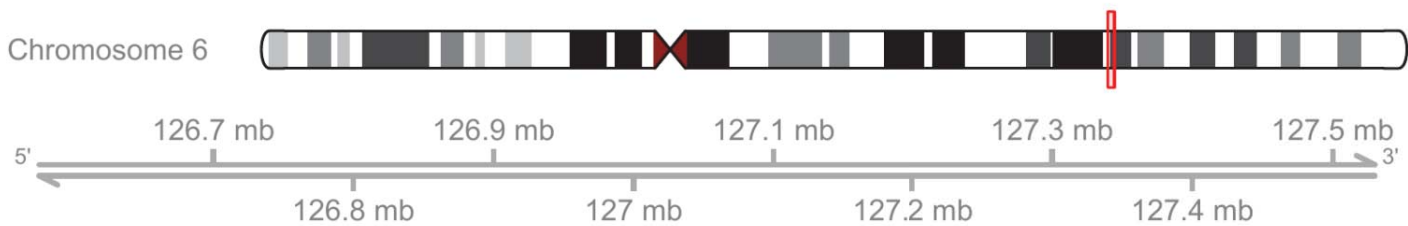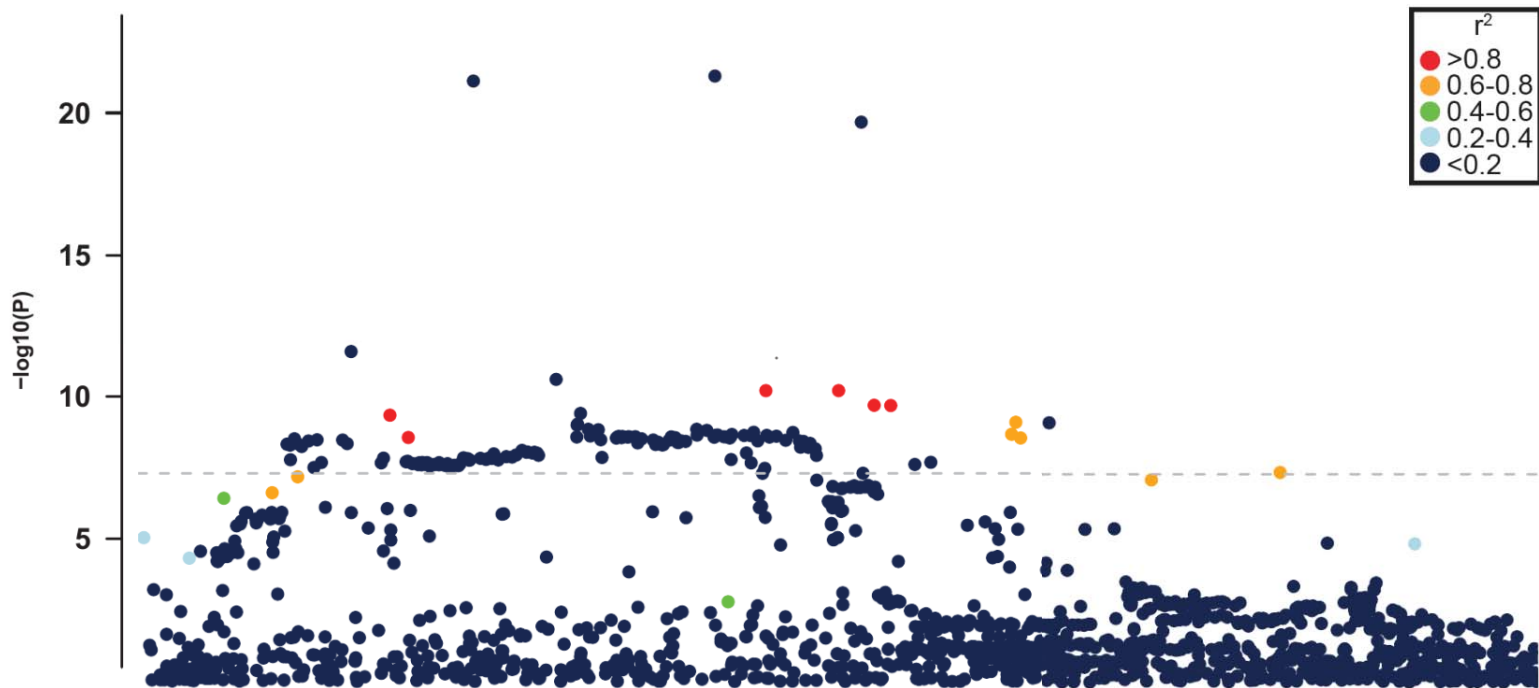

CENPW

R

GZ>CP

CP>GZ

Corrected for total SA

Uncorrected

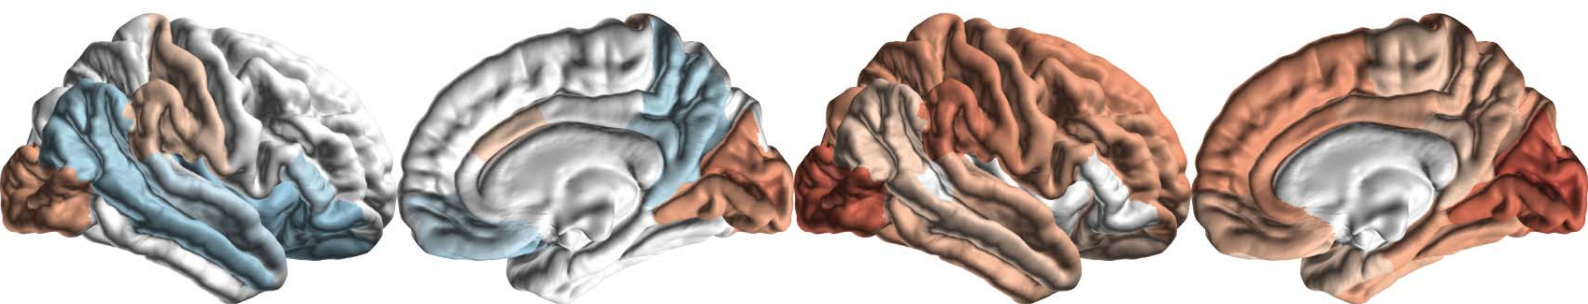

Zscore of the effect allele: C

-15 -10 -5 0 5 10 15

### Total Surface Area SA: rs11012732

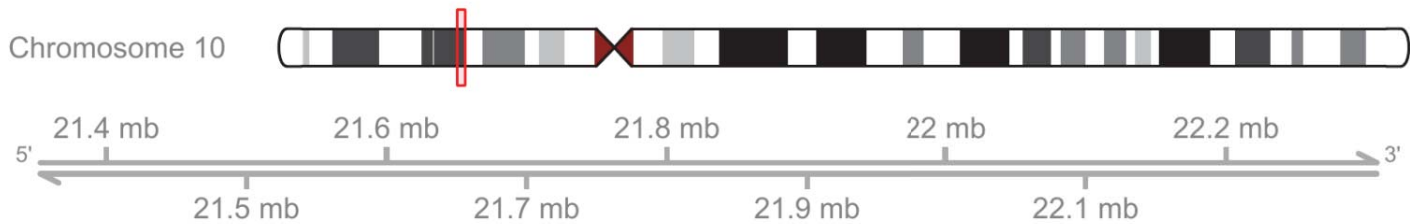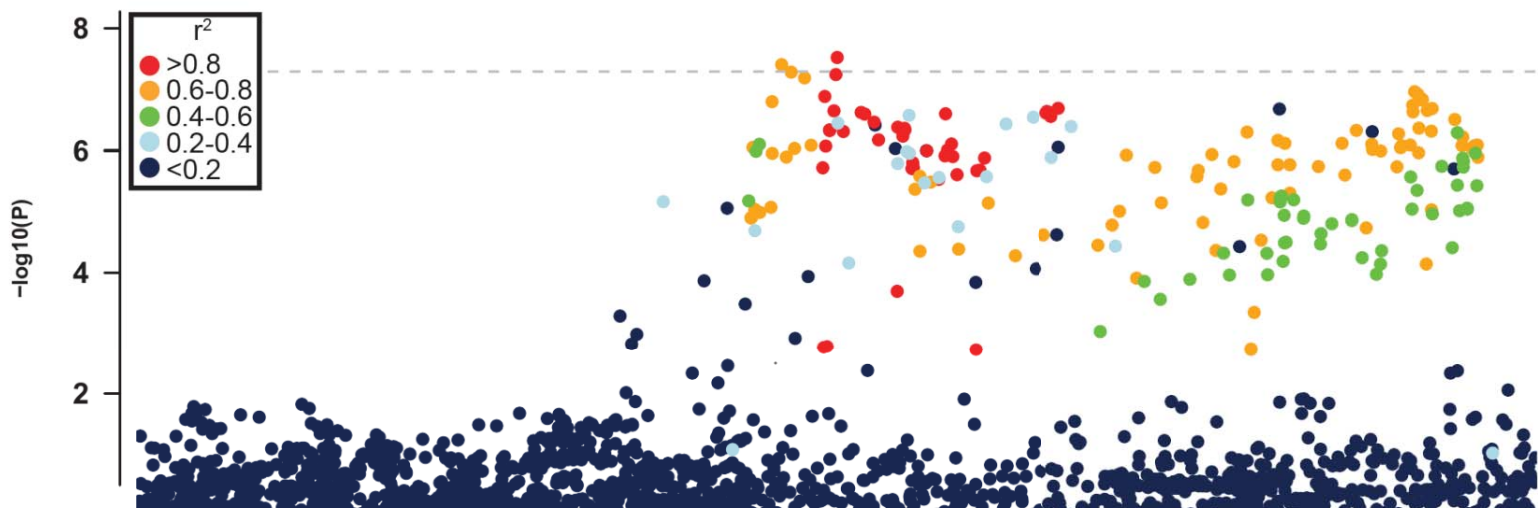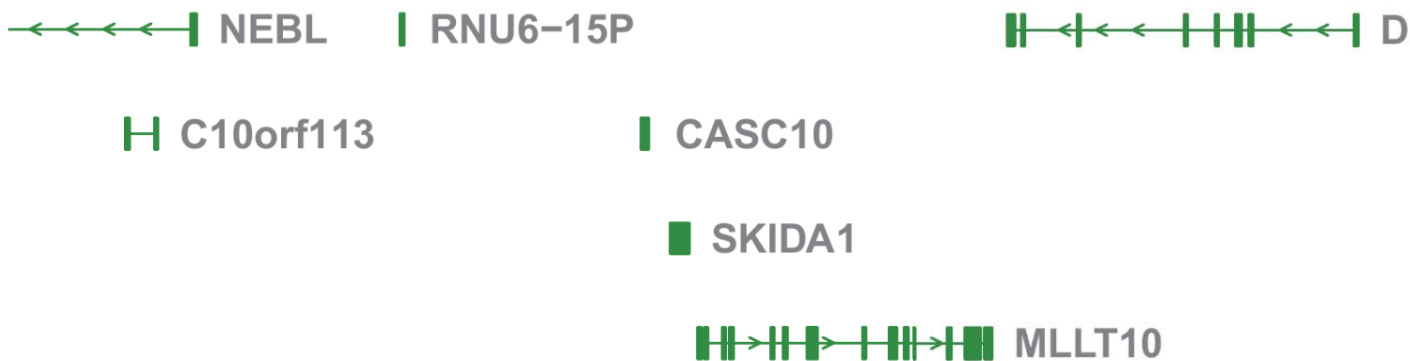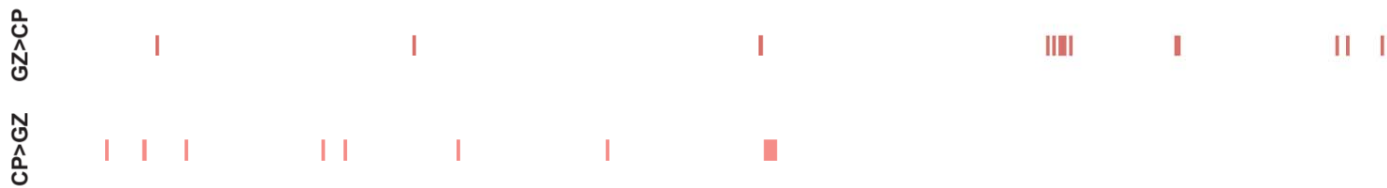

Corrected for total SA

Uncorrected

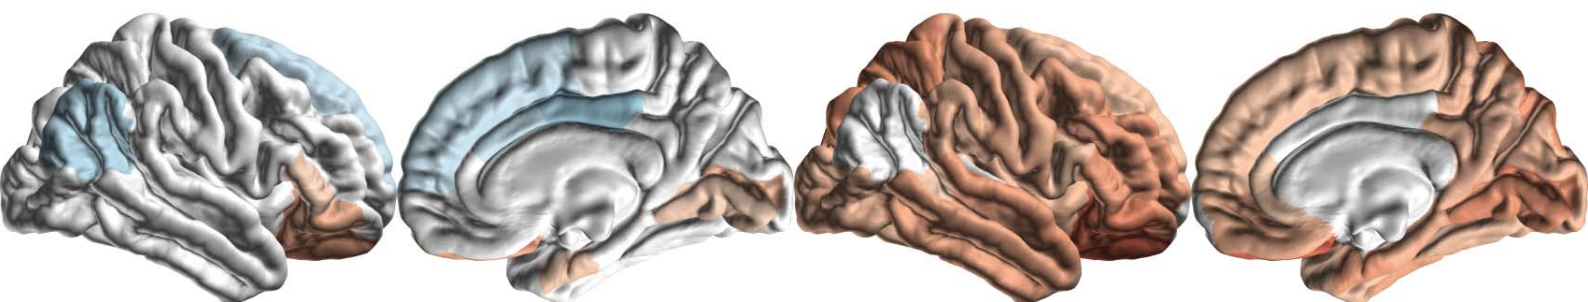

-15 -10 -5 0 5 10 15

# Total Surface Area SA: rs1628768

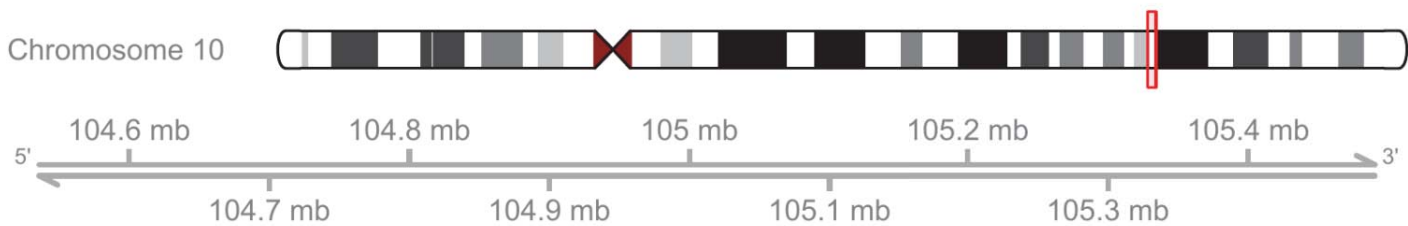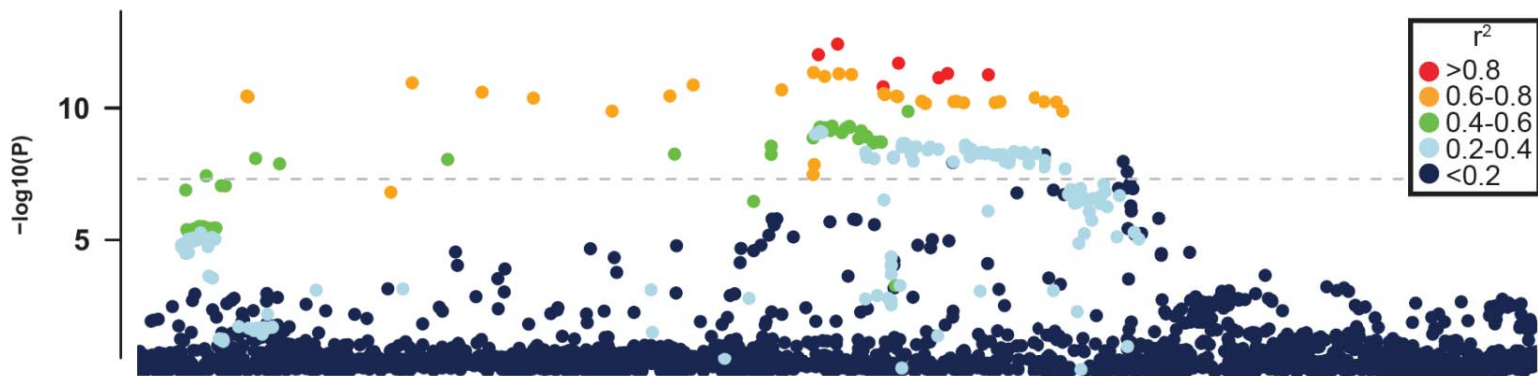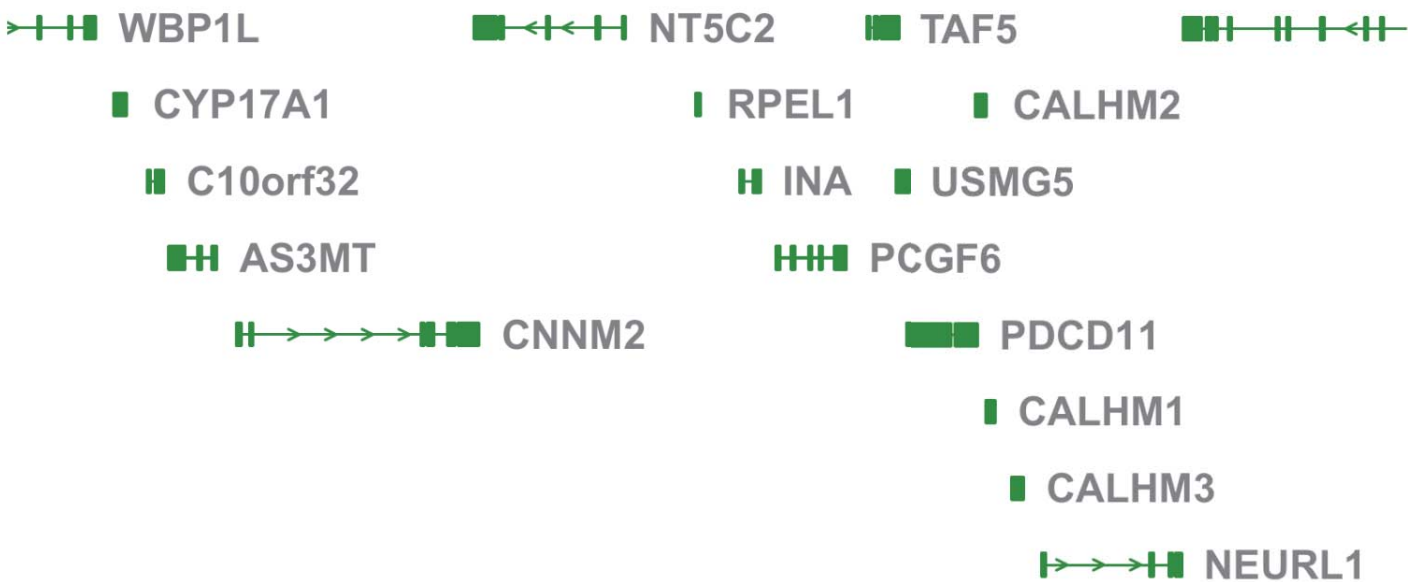

CP>GZ GZ>CP

Corrected for total SA

Uncorrected

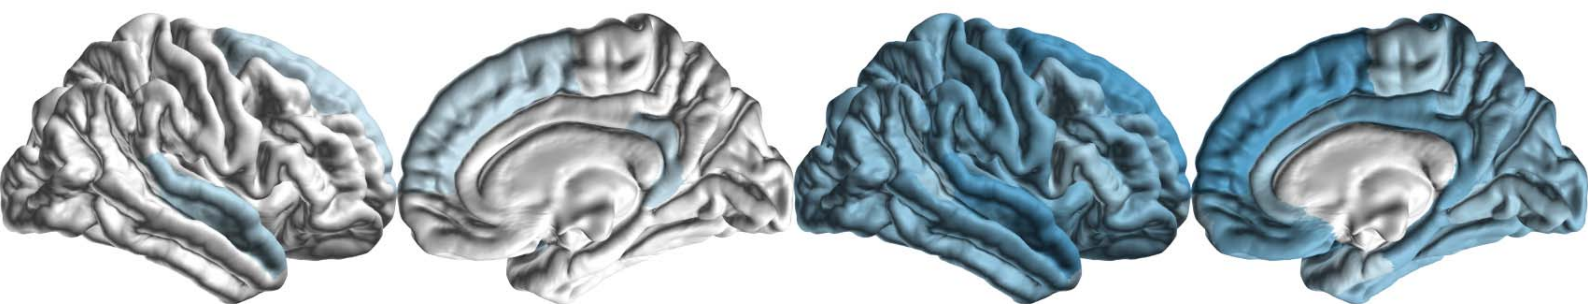

Zscore of the effect allele: T

-15 -10 -5 0 5 10 15



# Total Surface Area SA: rs11171739

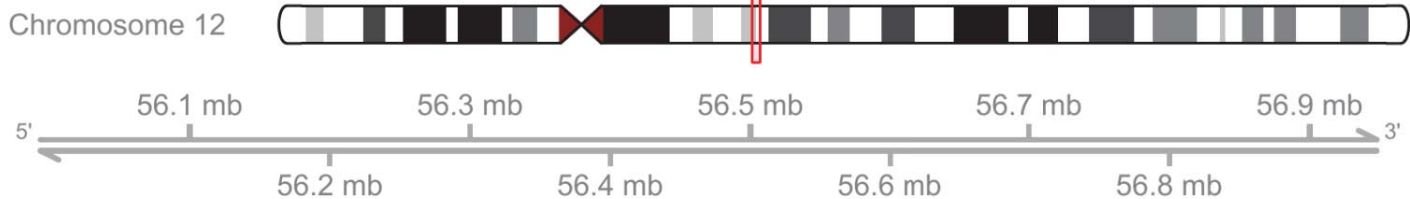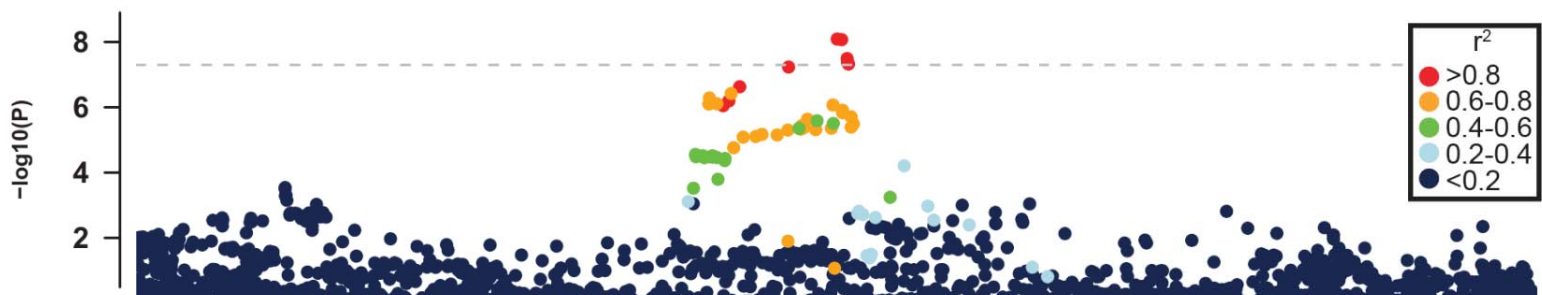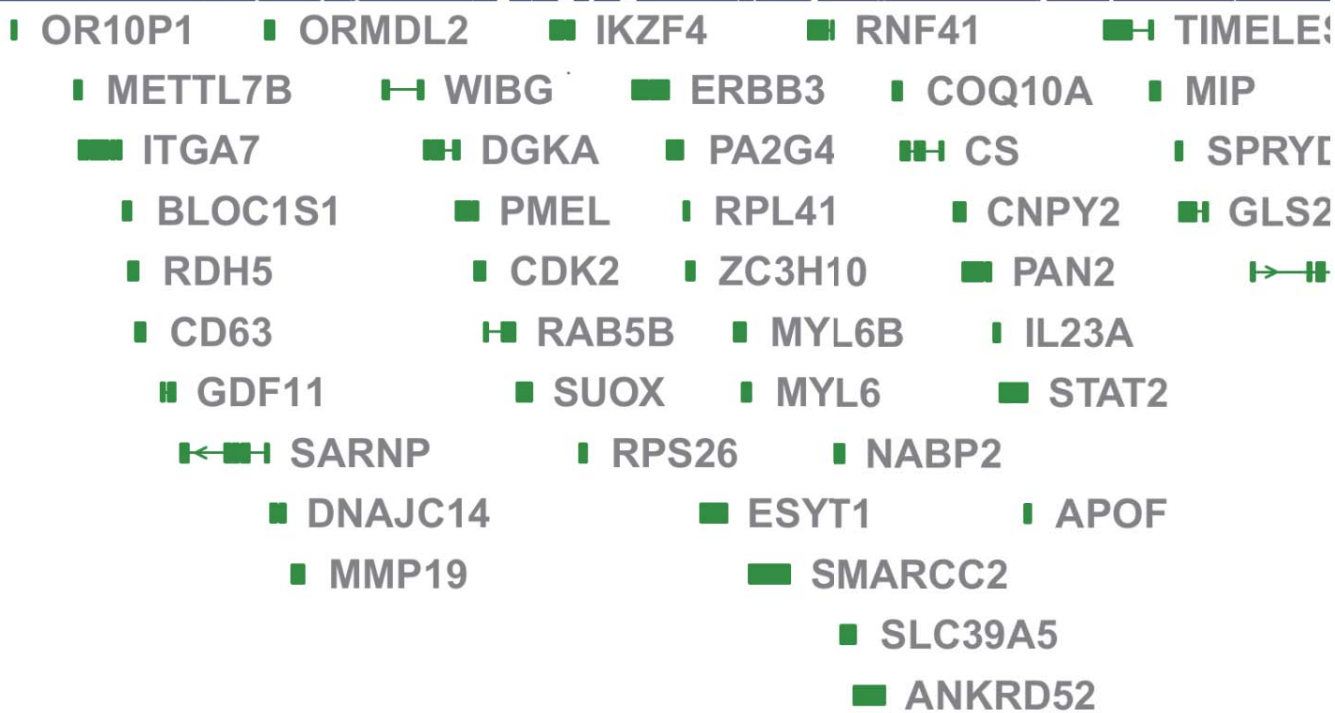

CP>GZZ>CP

Corrected for total SA

Uncorrected

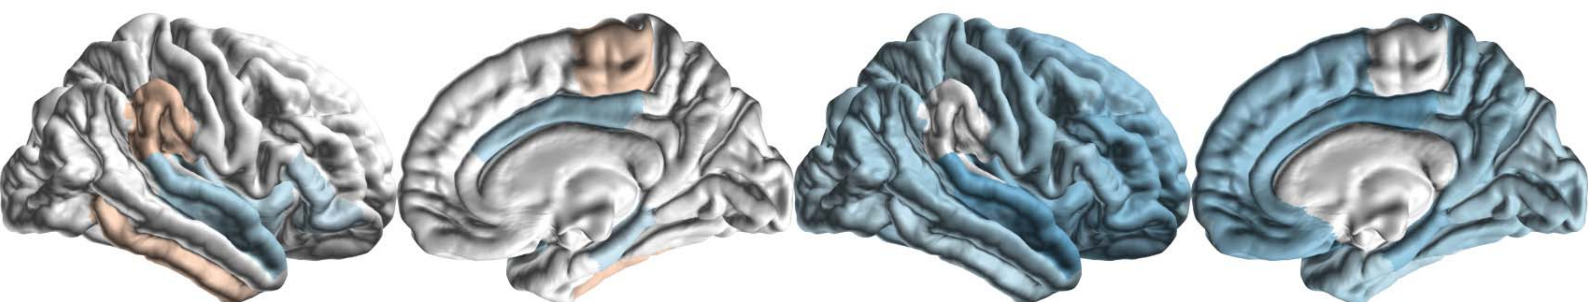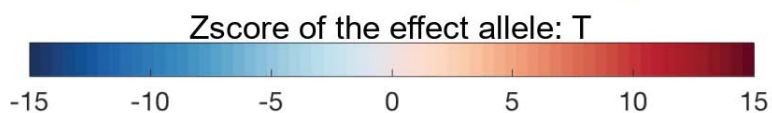

Total Surface Area SA: rs10878349

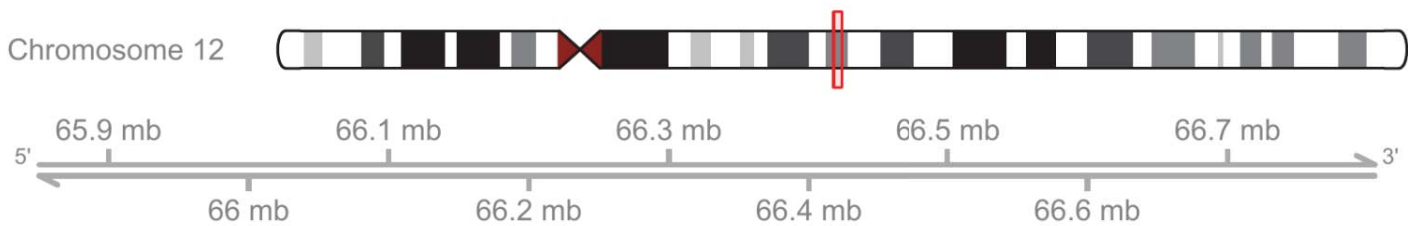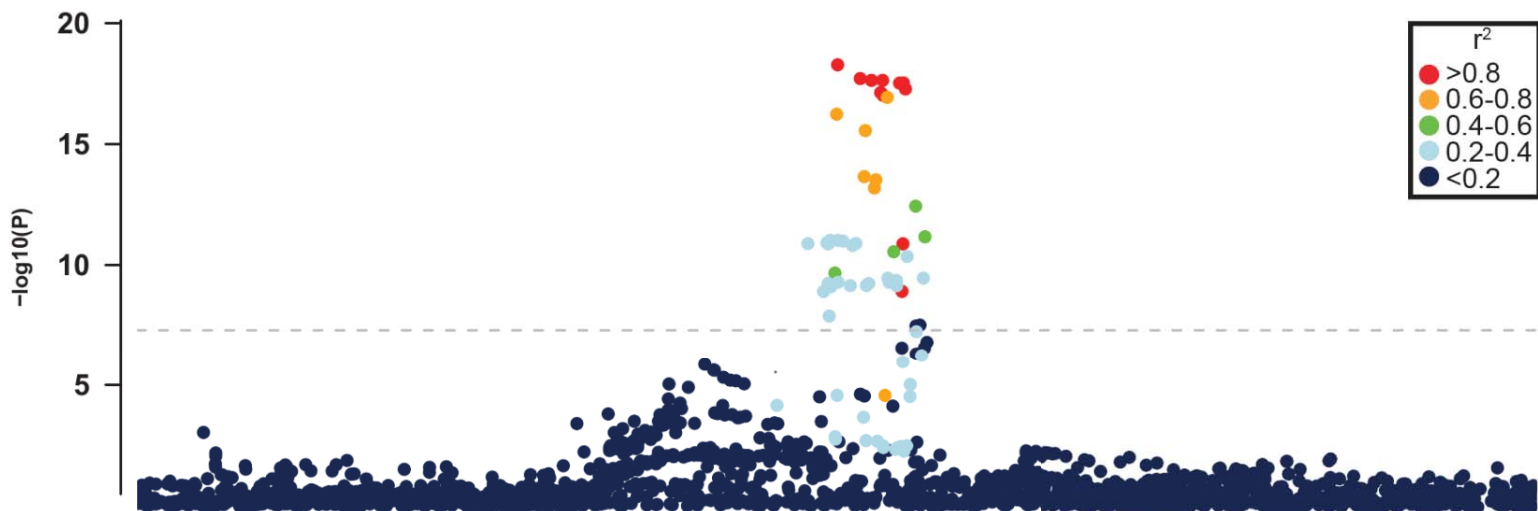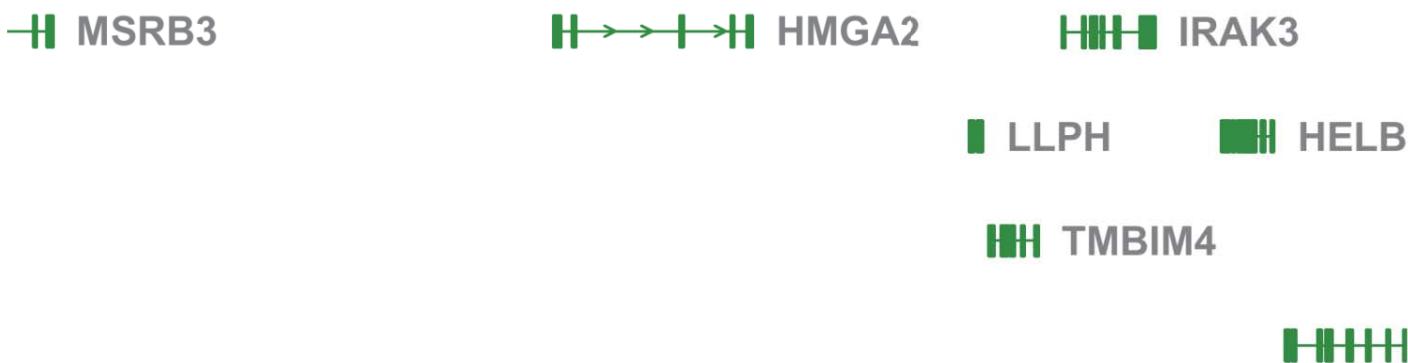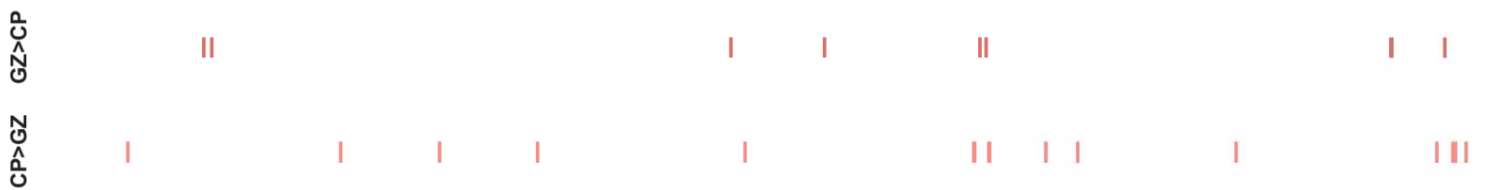

Corrected for total SA

Uncorrected

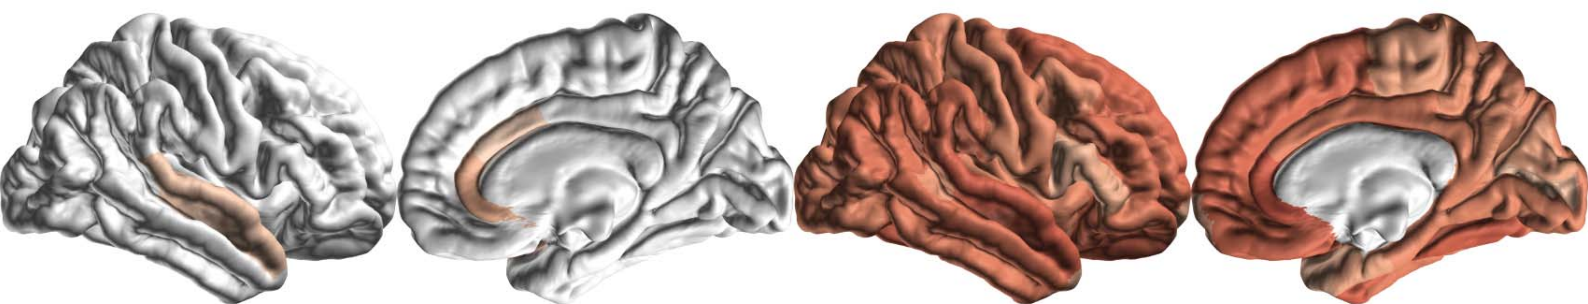

Zscore of the effect allele: A

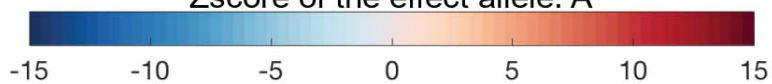

# Total Surface Area SA: rs62057153

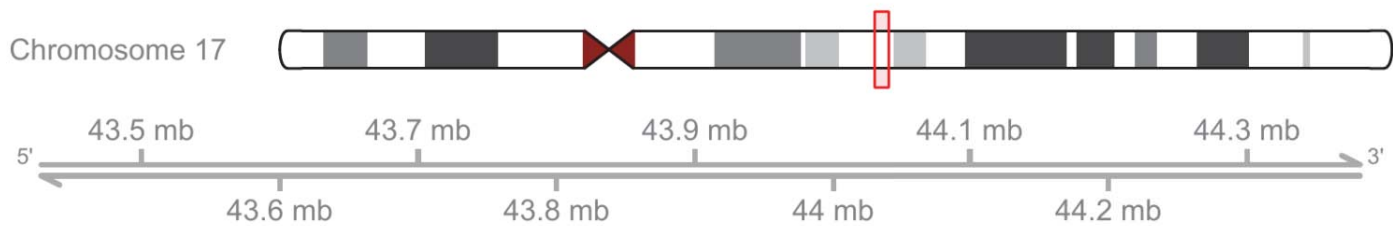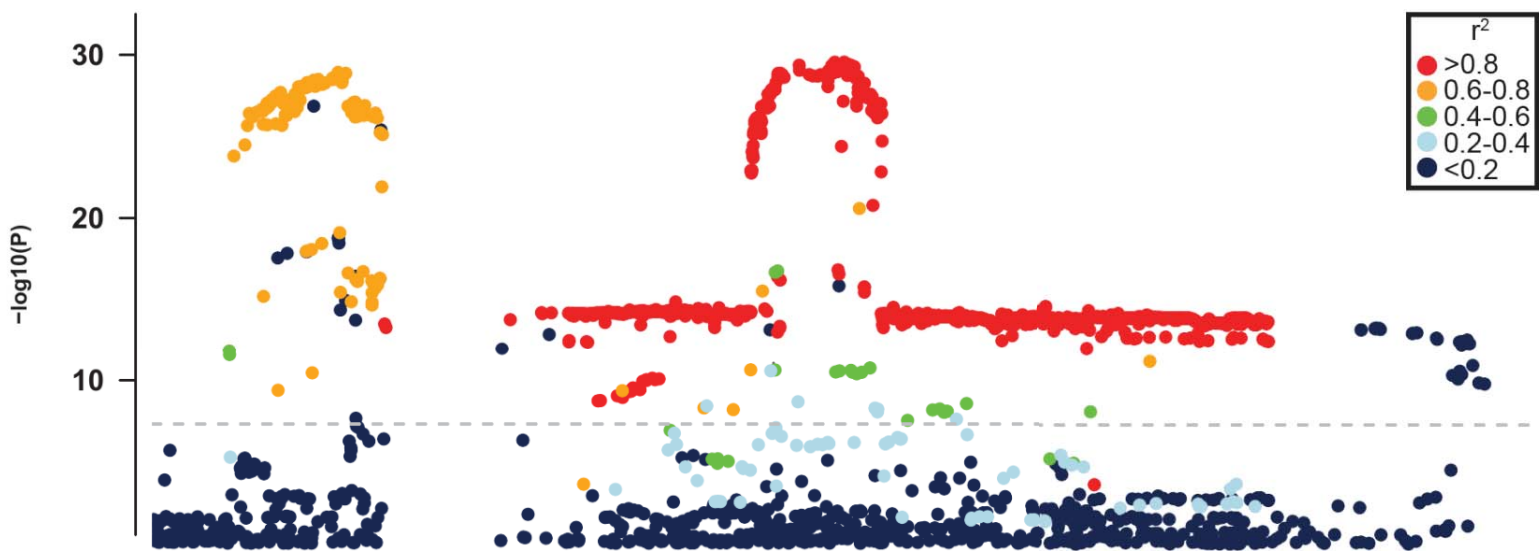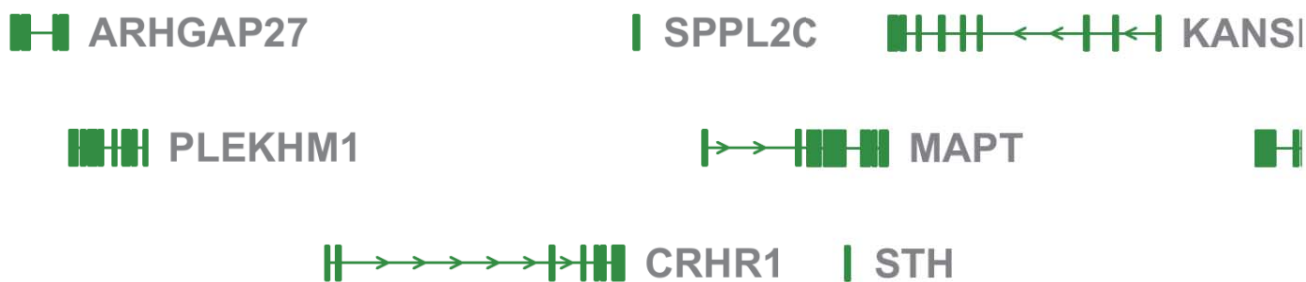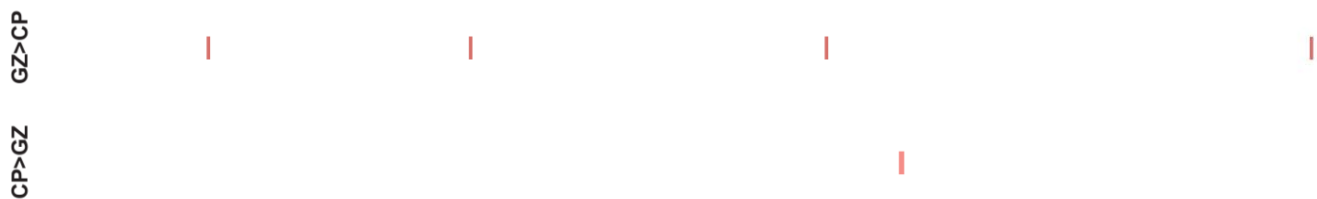

Corrected for total SA

Uncorrected

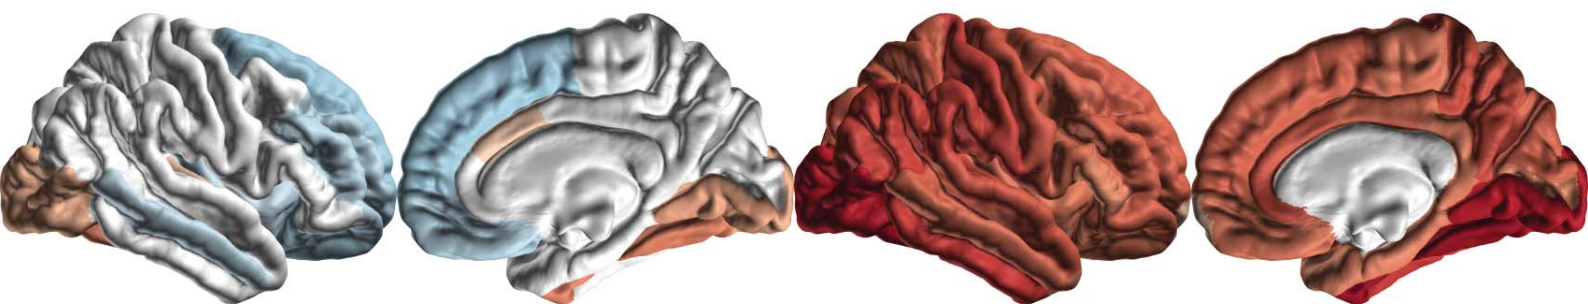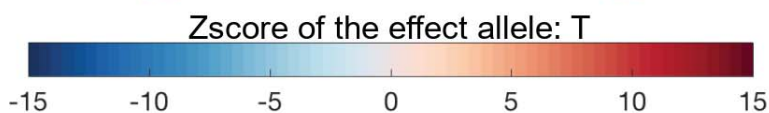



# Average Thickness TH: rs6738528

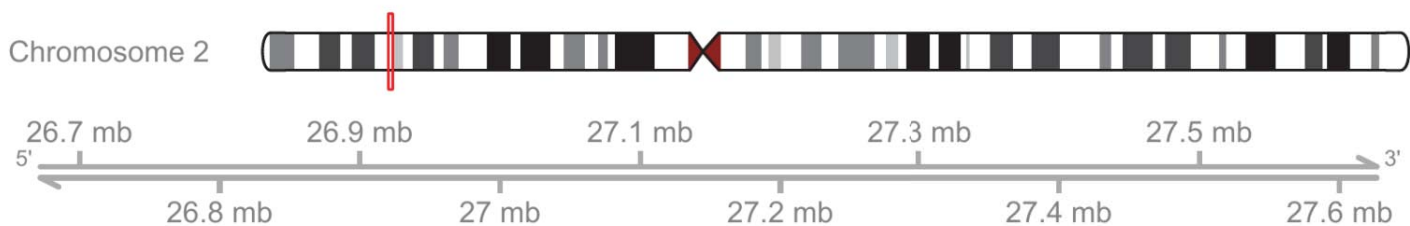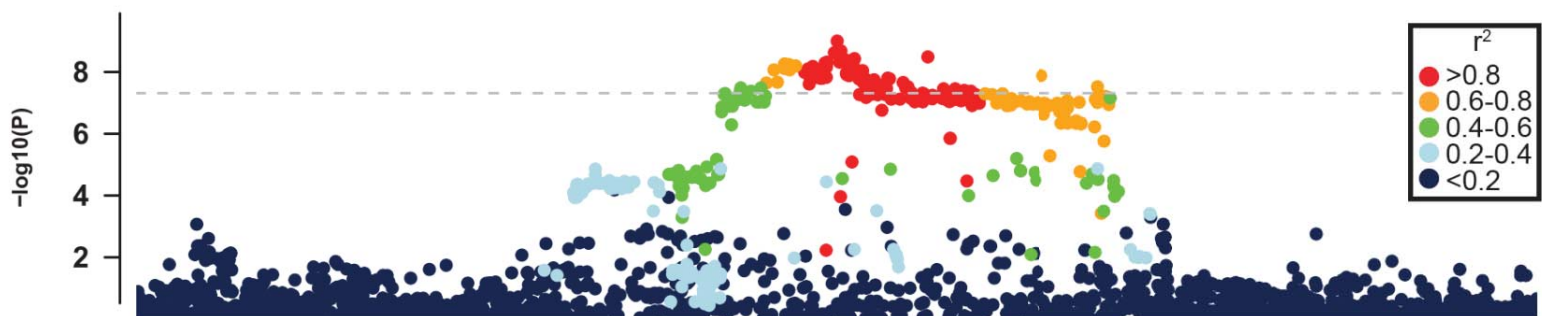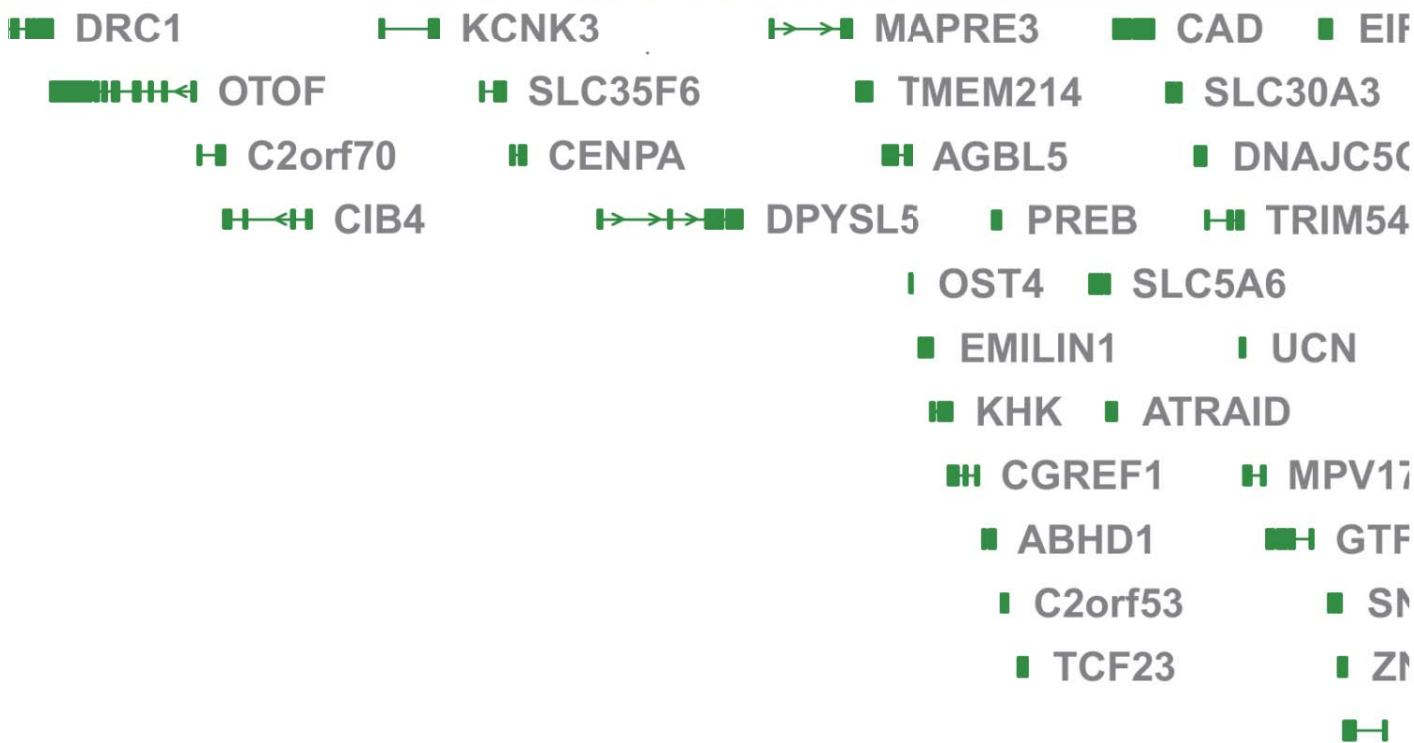

dIPFC

Corrected for average TH

Uncorrected

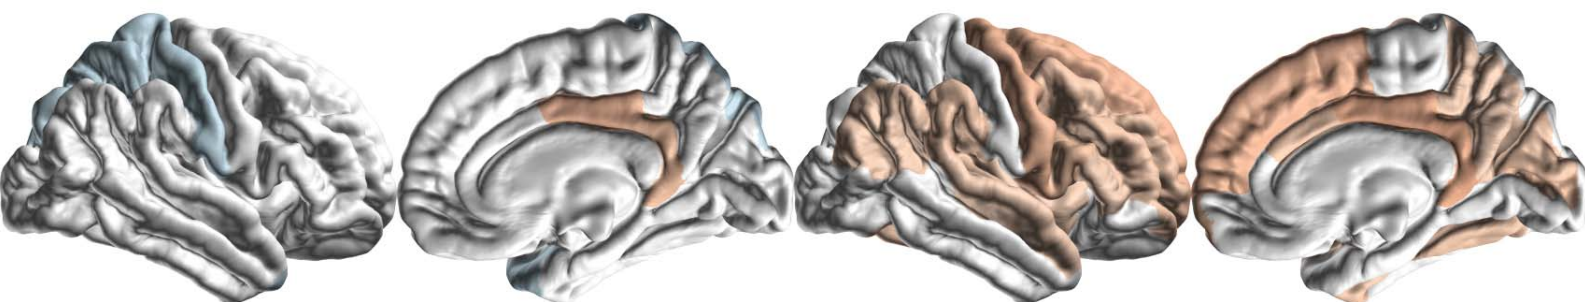

Zscore of the effect allele: A

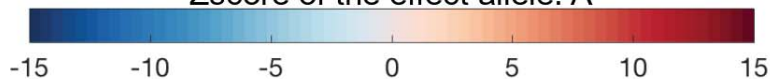

# Average Thickness TH: rs11692435

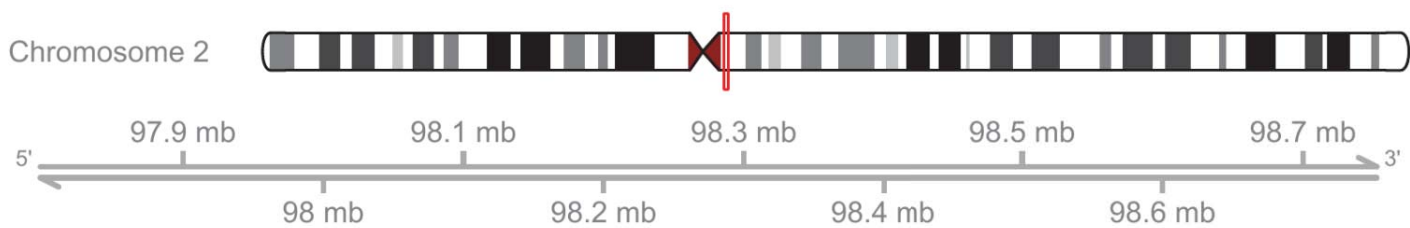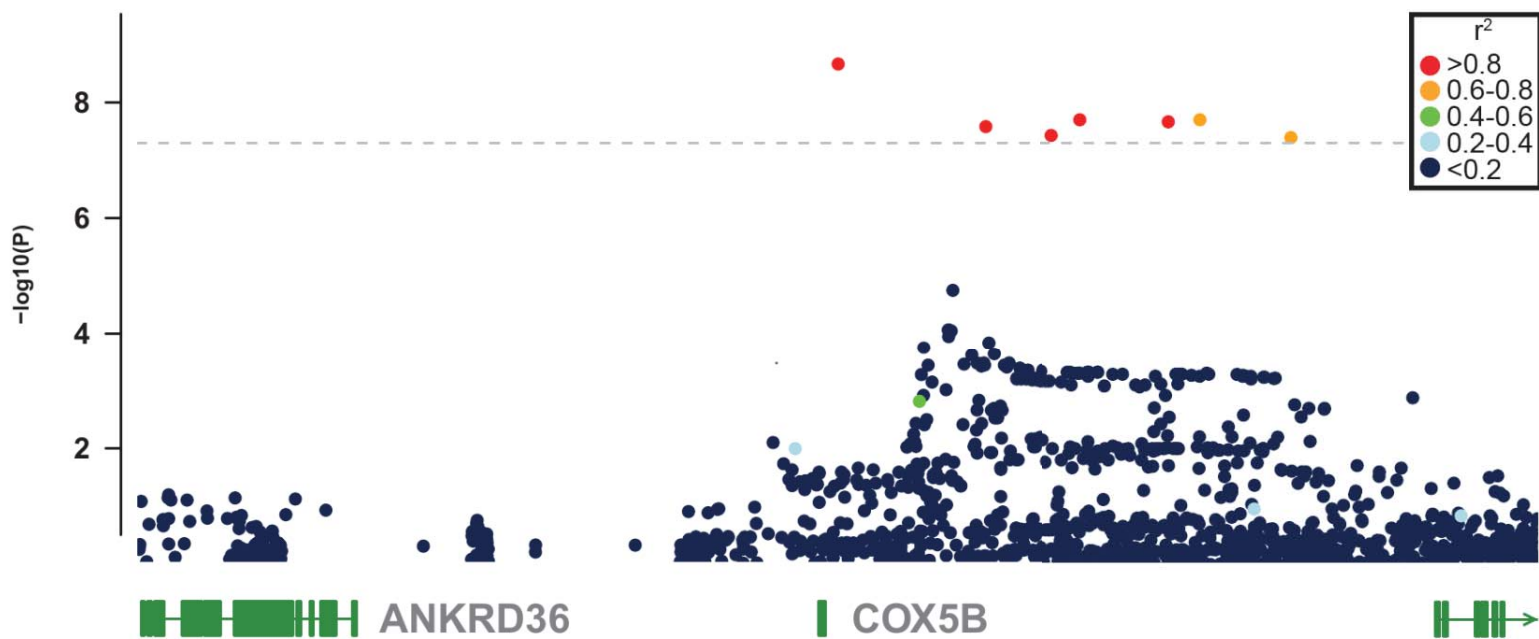

ACTR1B

ZAP70

TMEM131

dIPFC

Corrected for average TH

Uncorrected

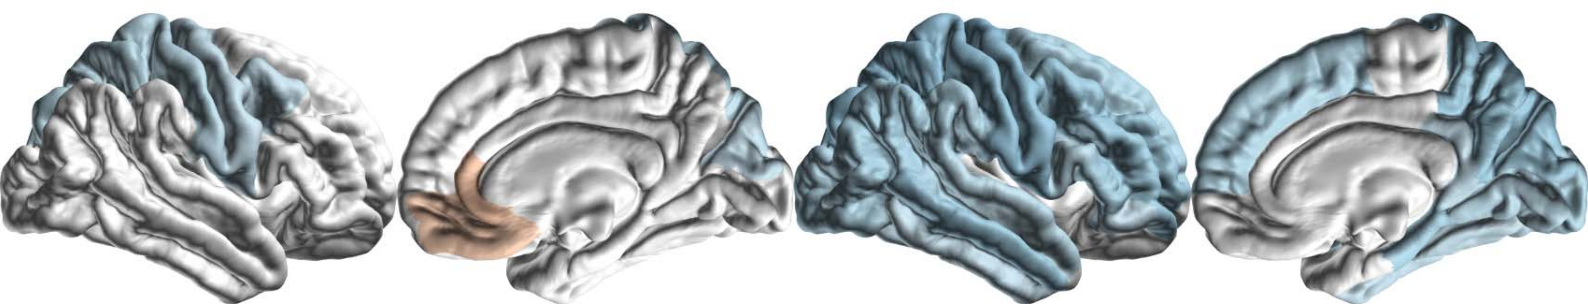

Zscore of the effect allele: A

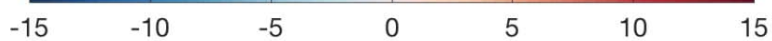



# Average Thickness TH: rs630934

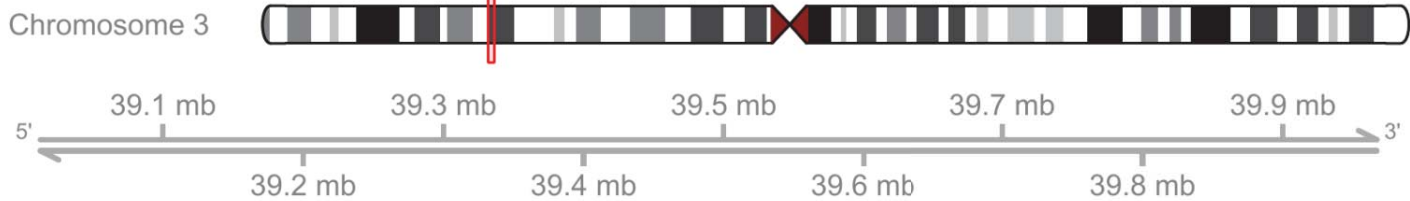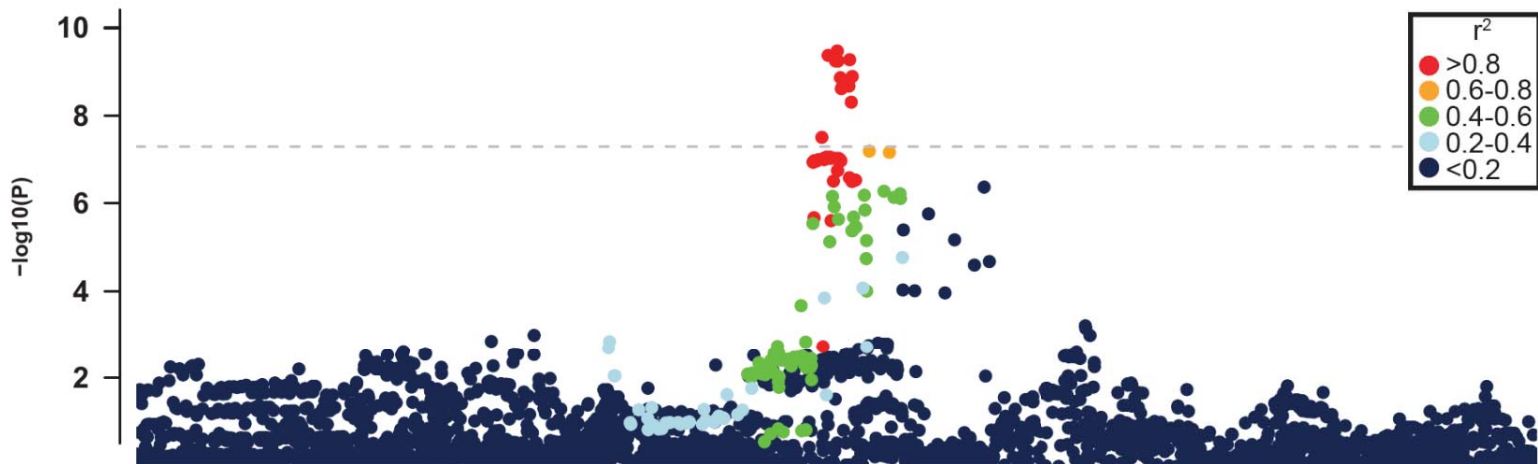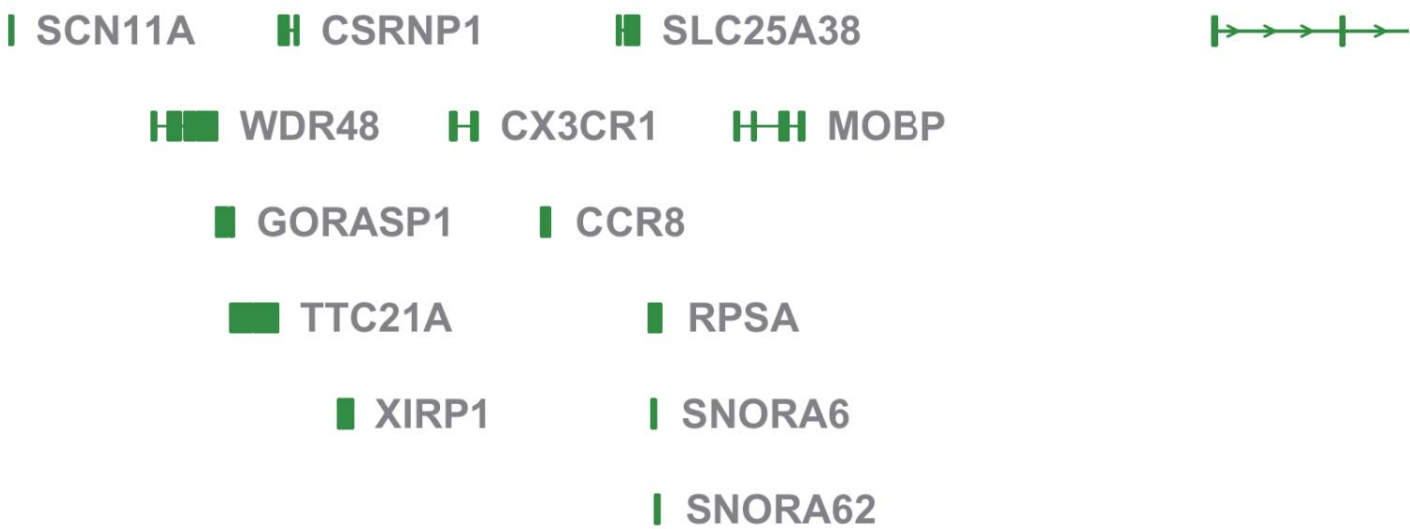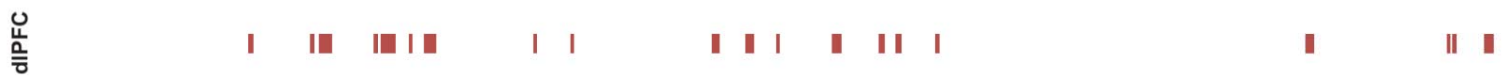

Corrected for average TH

Uncorrected

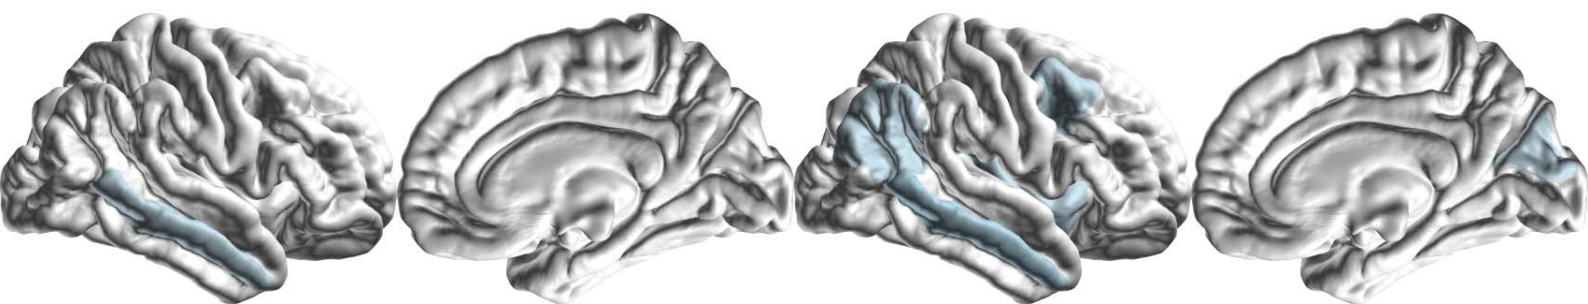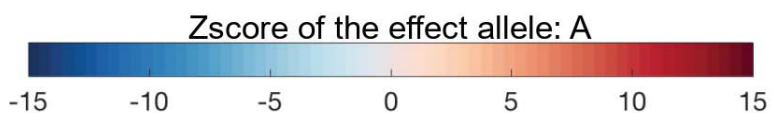

# Average Thickness TH: rs13110077

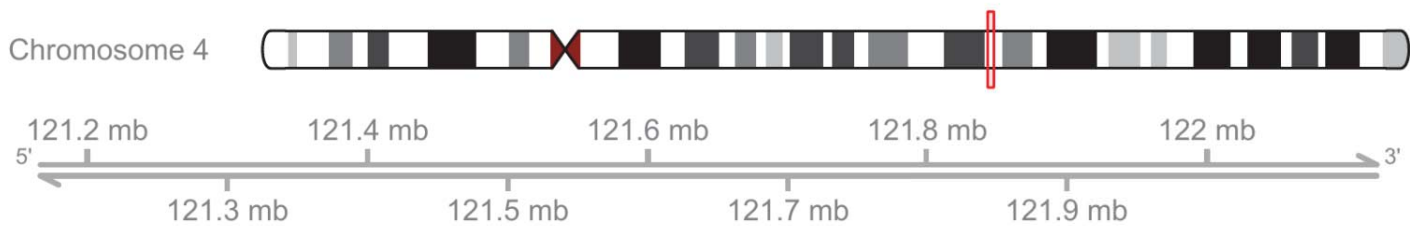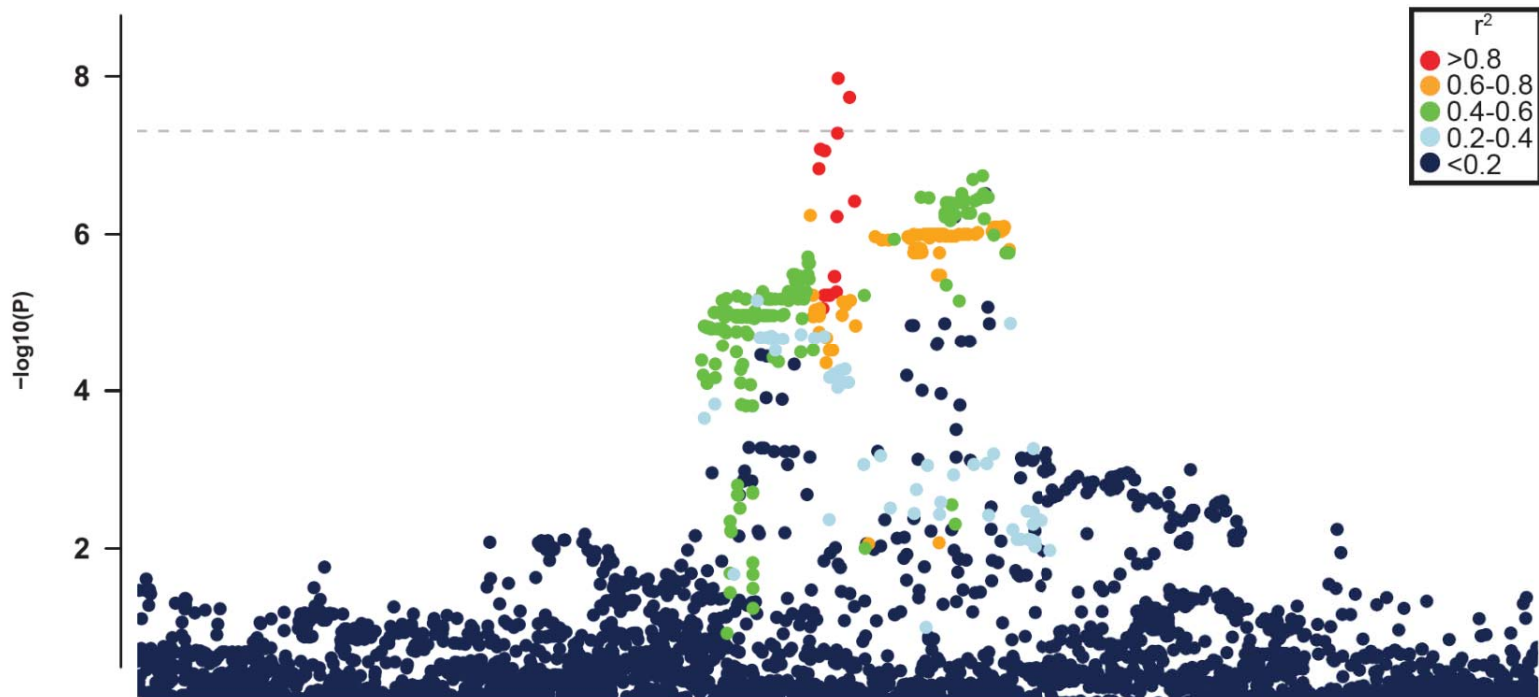

PRDM5 NDNF

NDNF

dIPFC

Corrected for average TH

Uncorrected

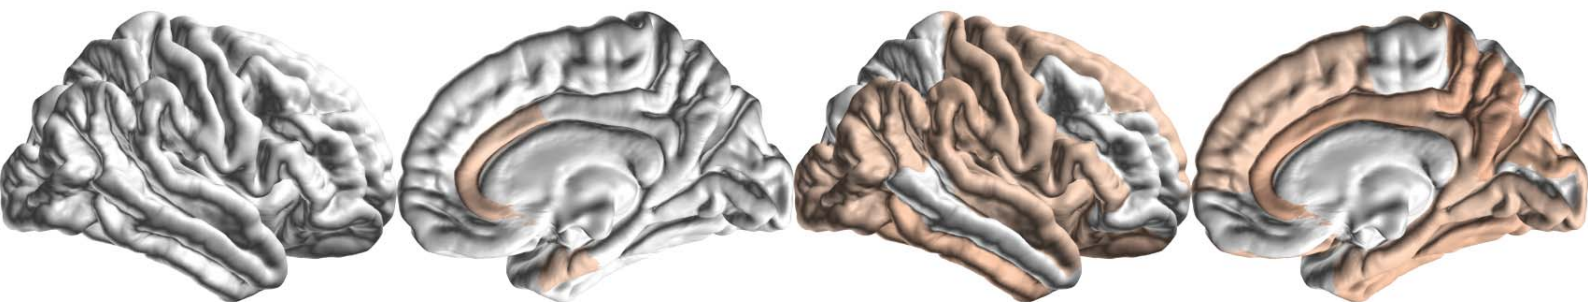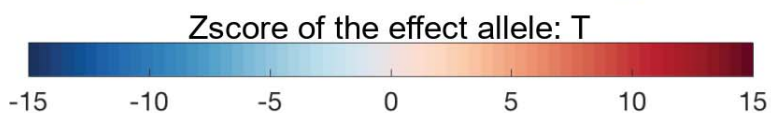

### Average Thickness TH: rs2980497

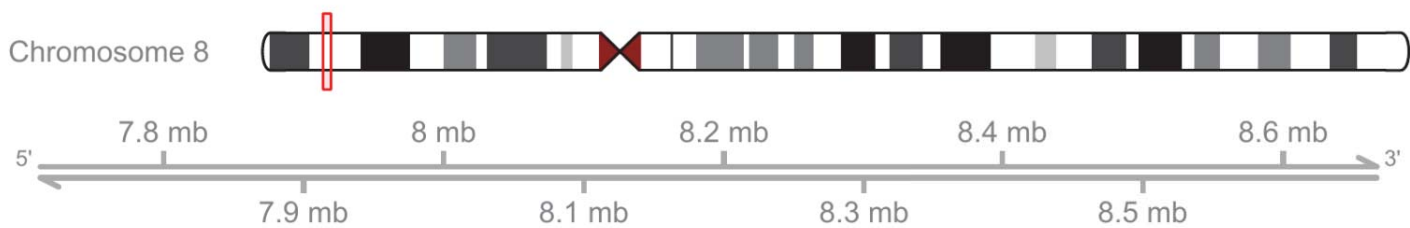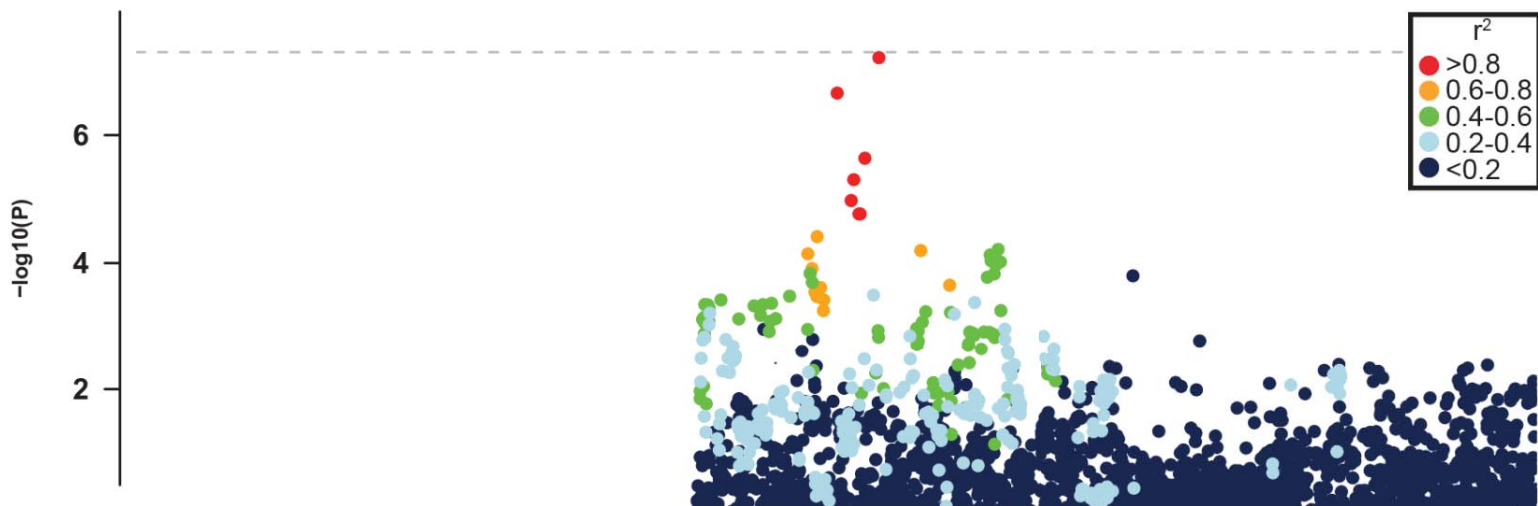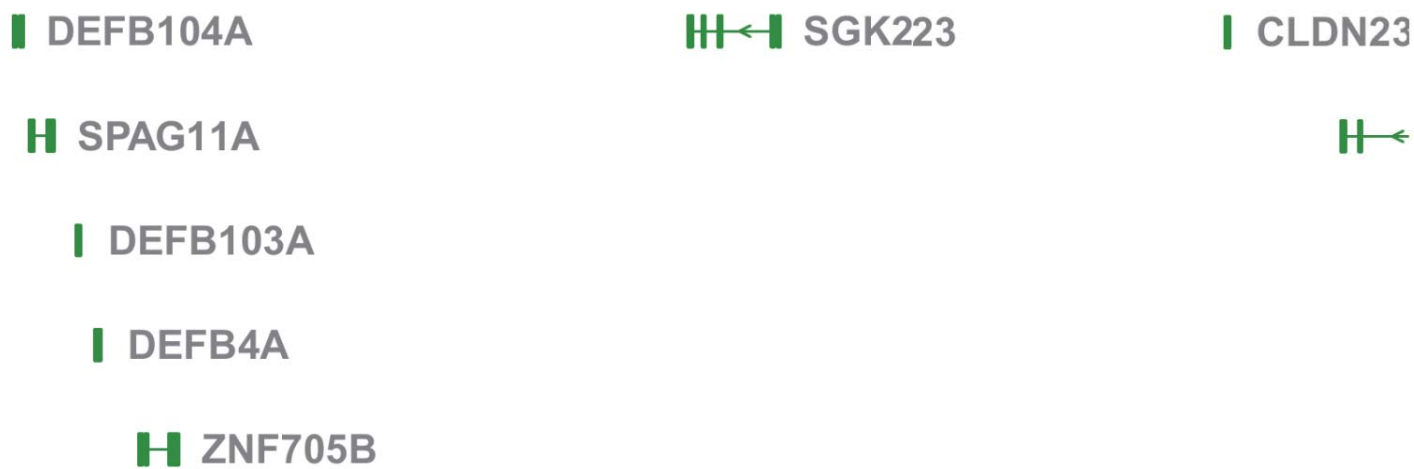

dIPFC

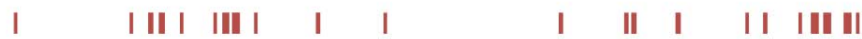

Corrected for average TH

Uncorrected

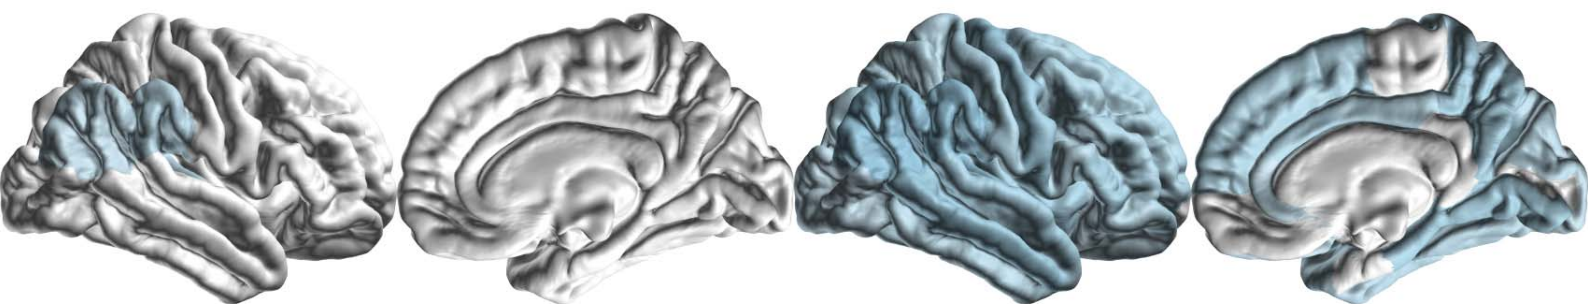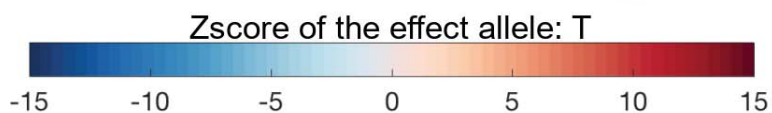



# Average Thickness TH: rs7824177

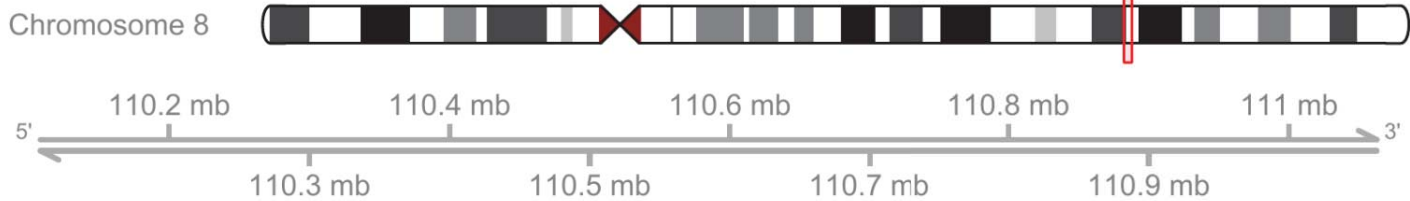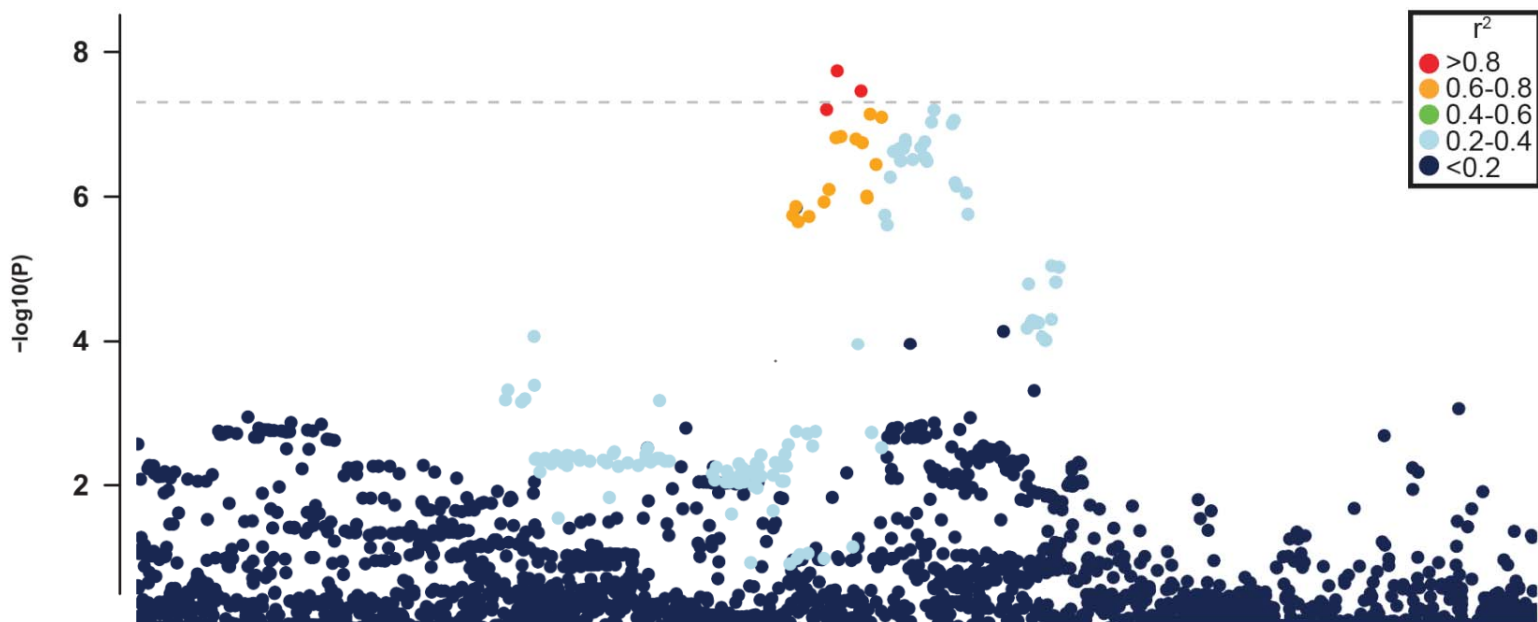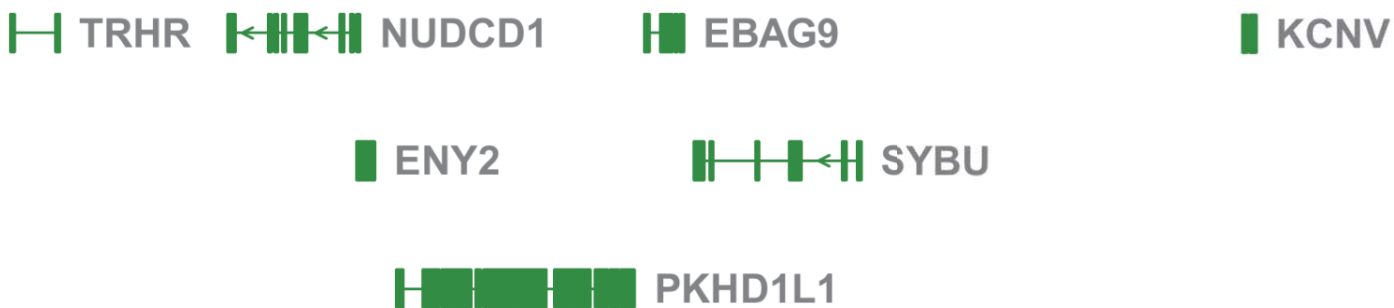

dIPFC

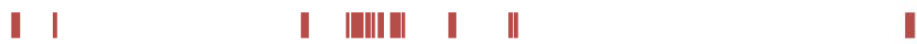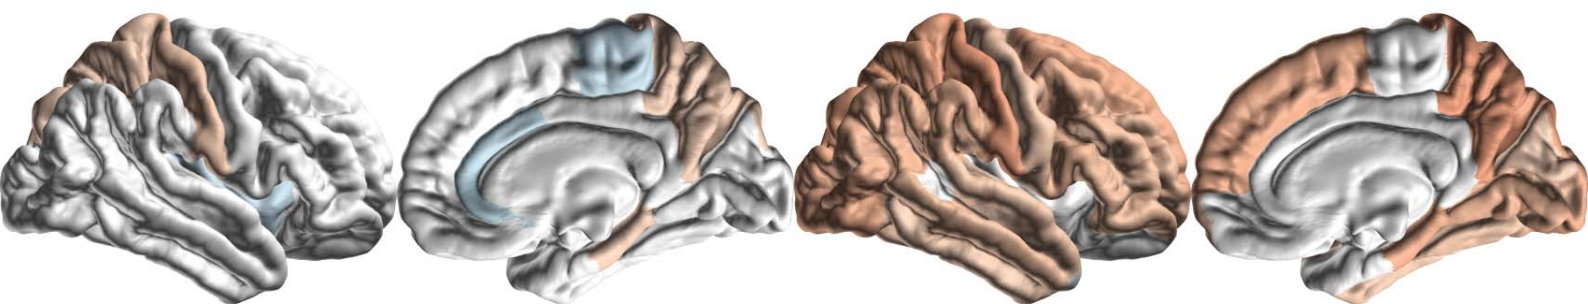

Zscore of the effect allele: A



# Average Thickness TH: rs17769552

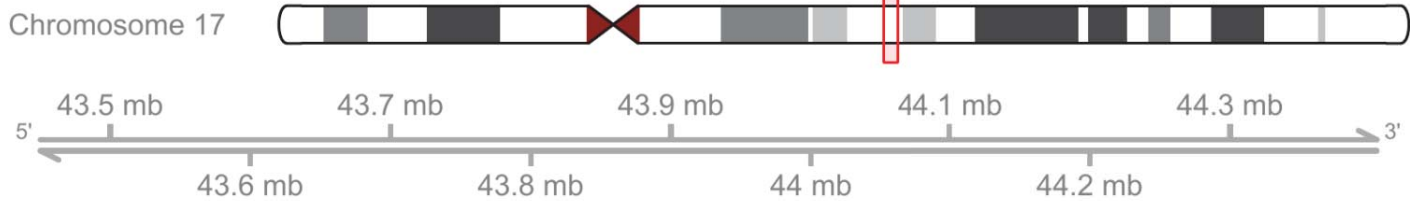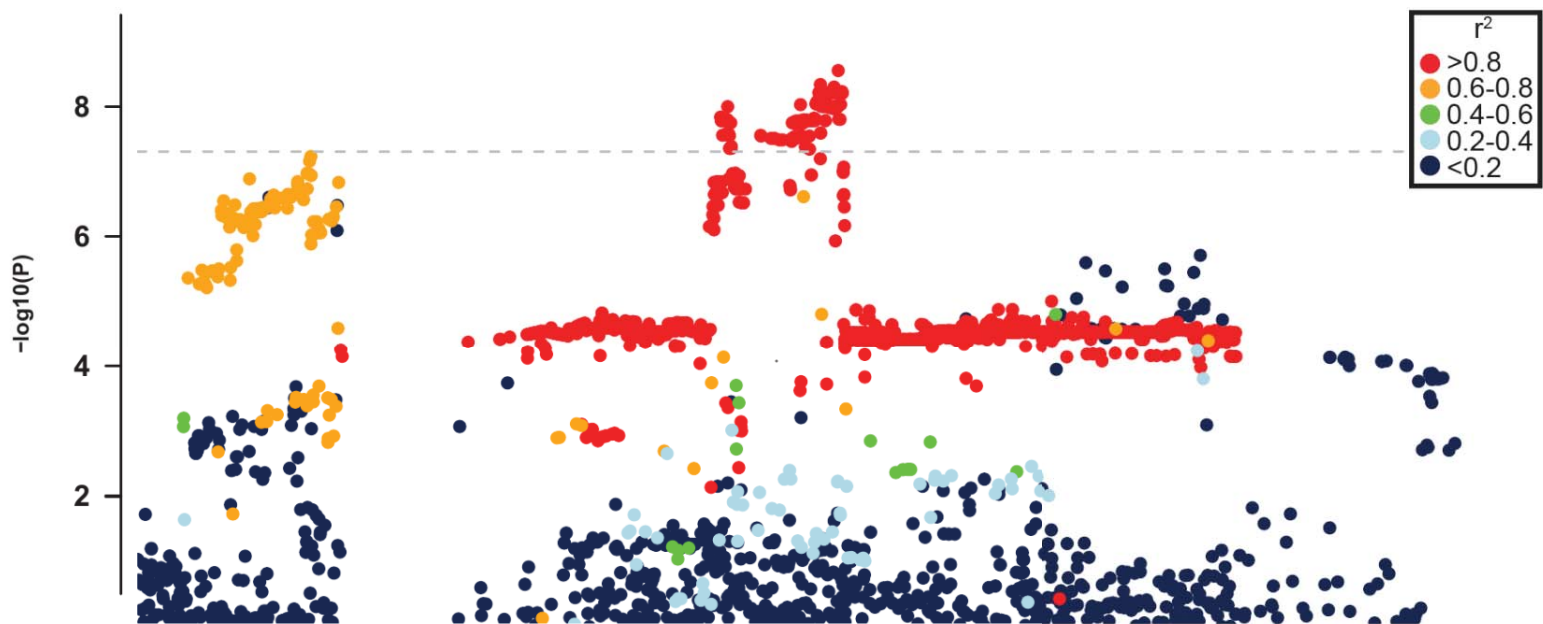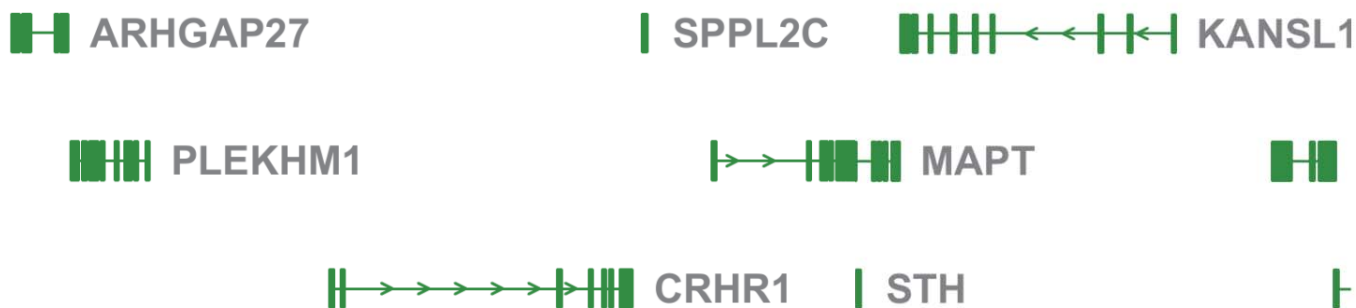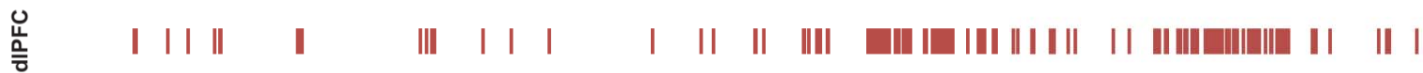

Corrected for average TH

Uncorrected

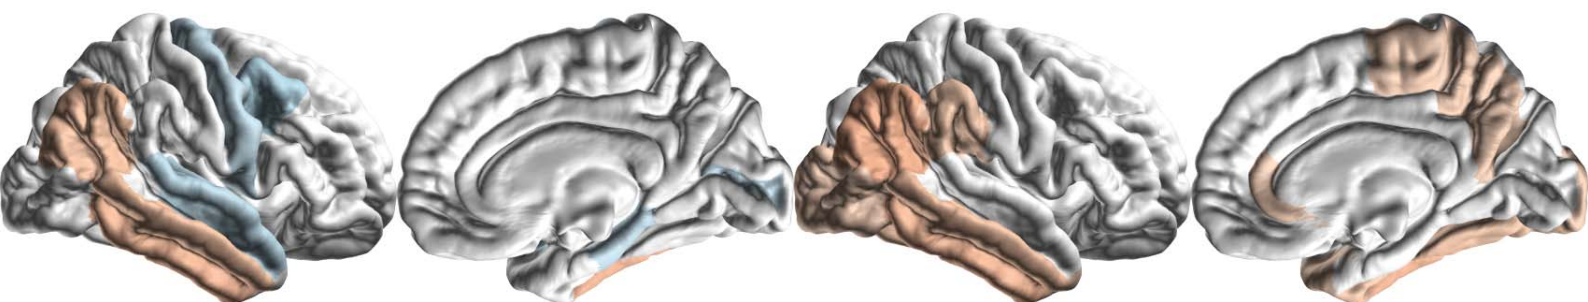

Zscore of the effect allele: A

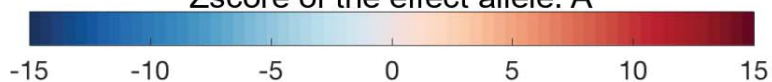

# Frontal Pole SA: rs17464221

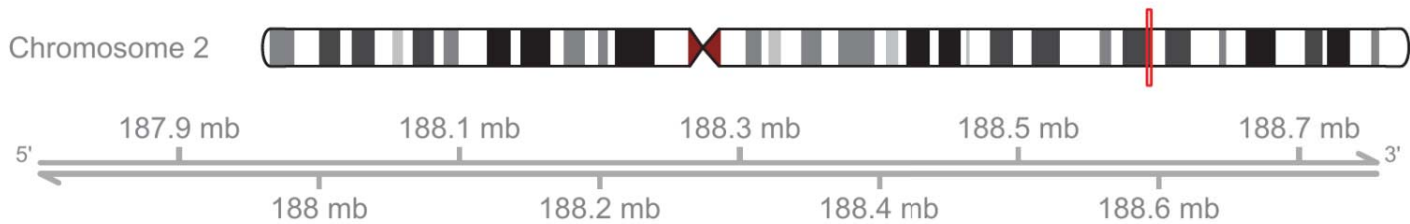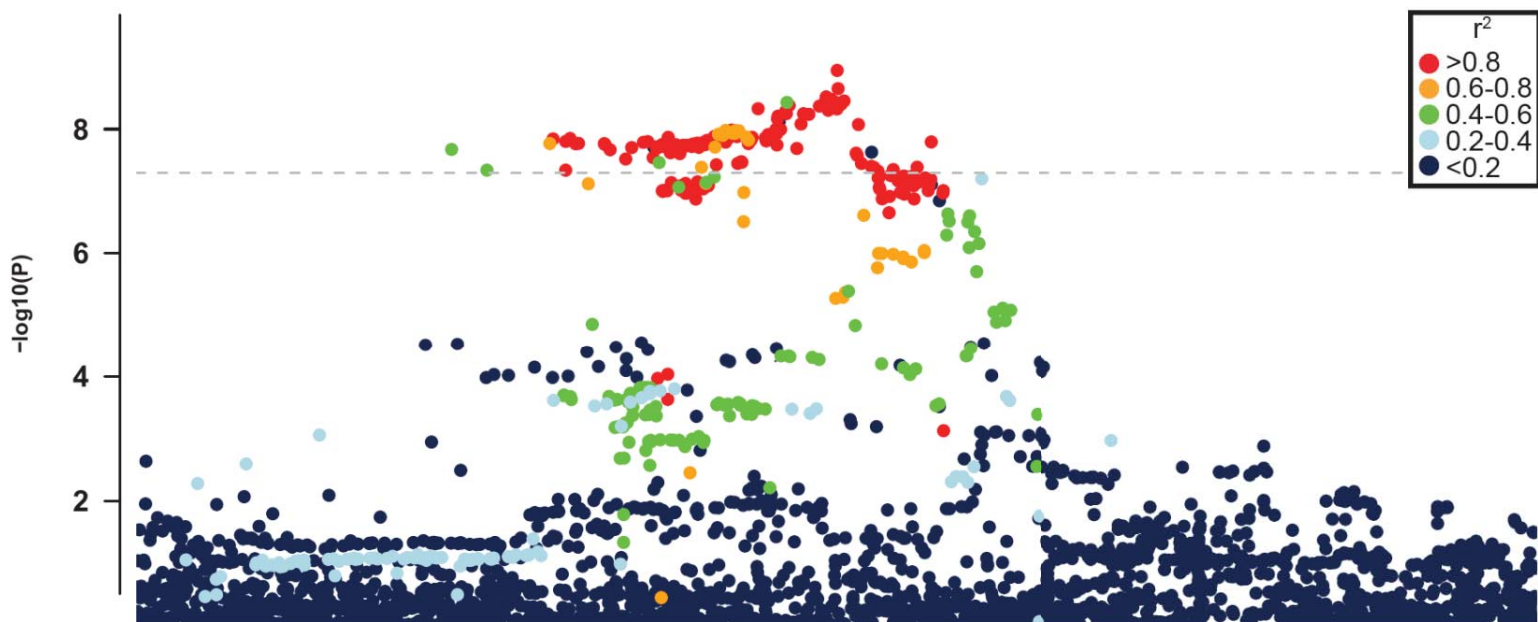

 CALCRL

 TFPI

GZ>CP

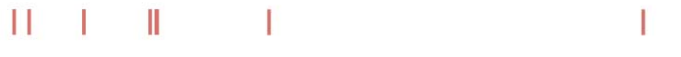

CP>GZ

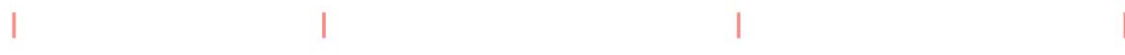

Corrected for total SA

Uncorrected

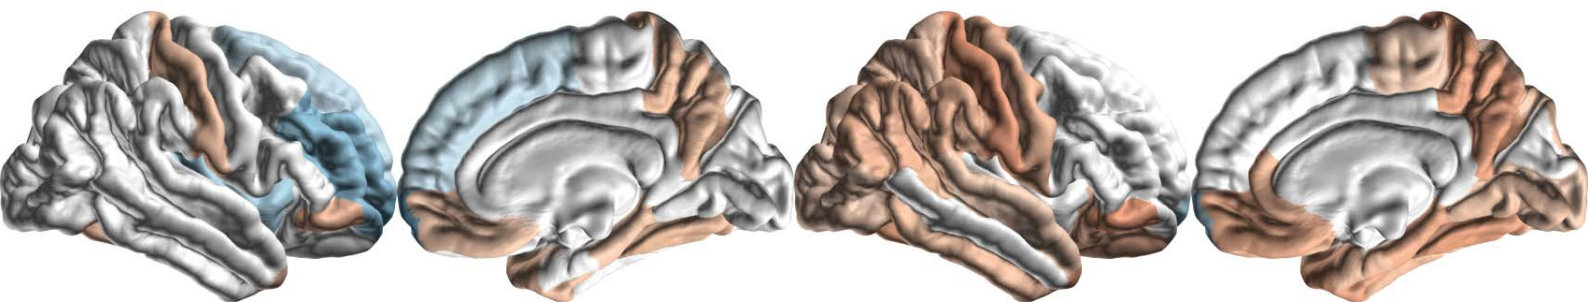

Zscore of the effect allele: T

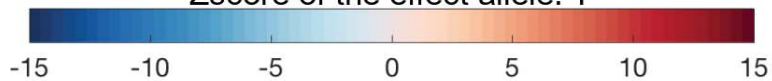



# Frontal Pole SA: rs113050298

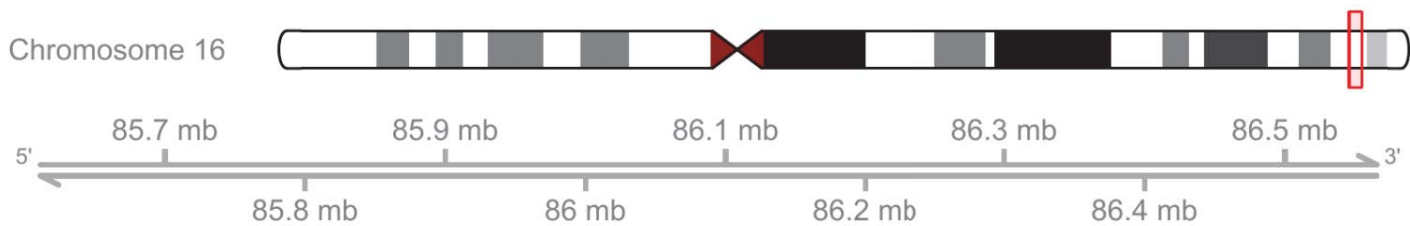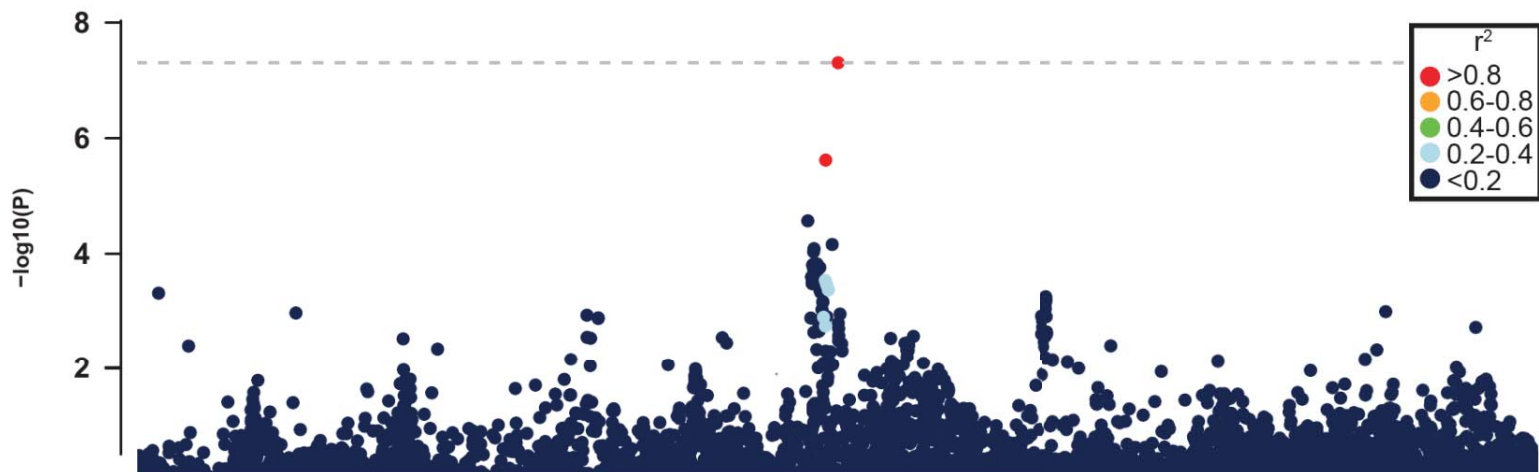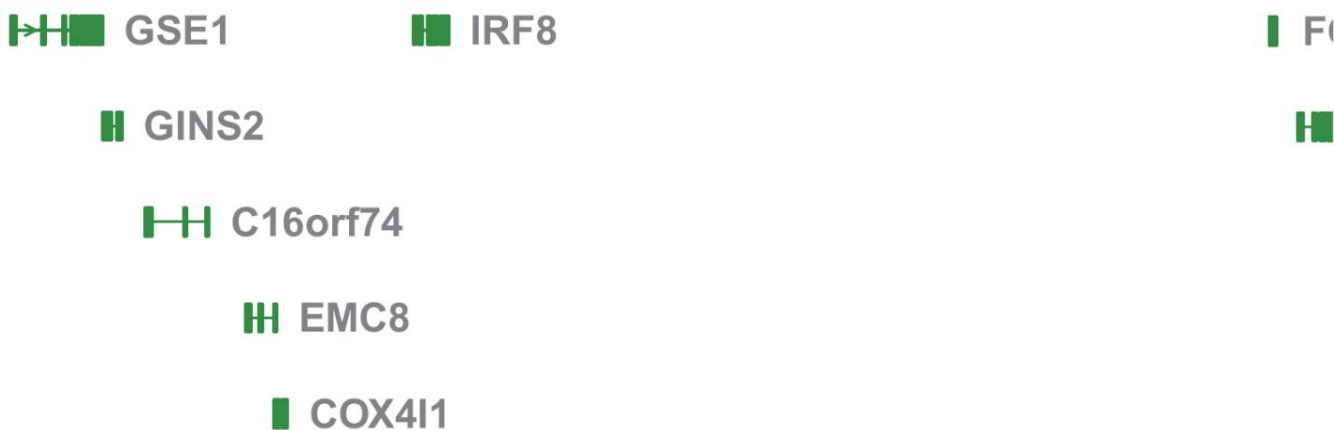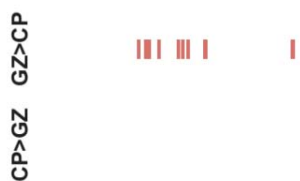

Corrected for total SA

Uncorrected

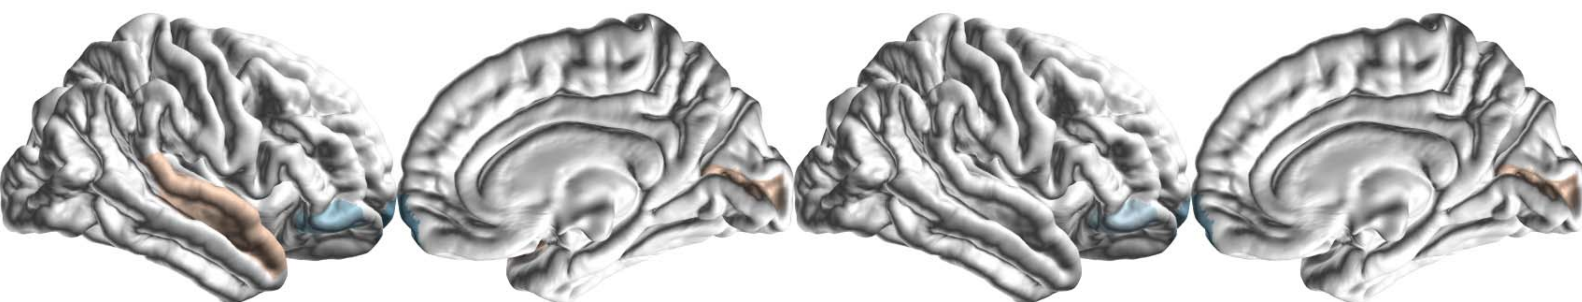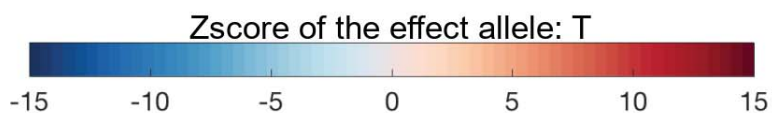

# Lateral Orbitofrontal SA: rs7529542

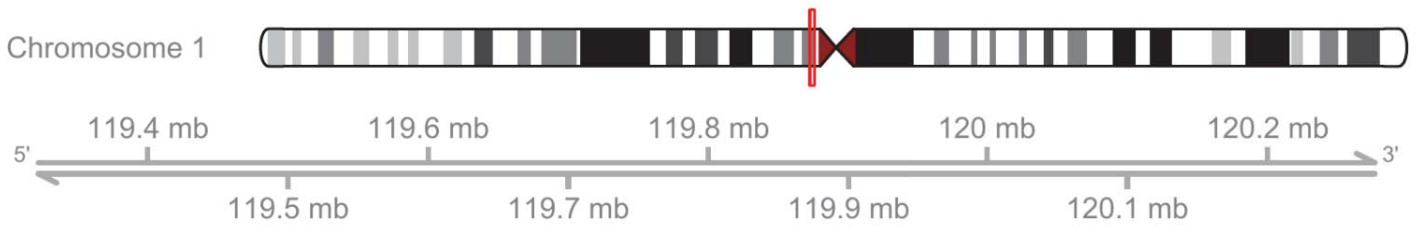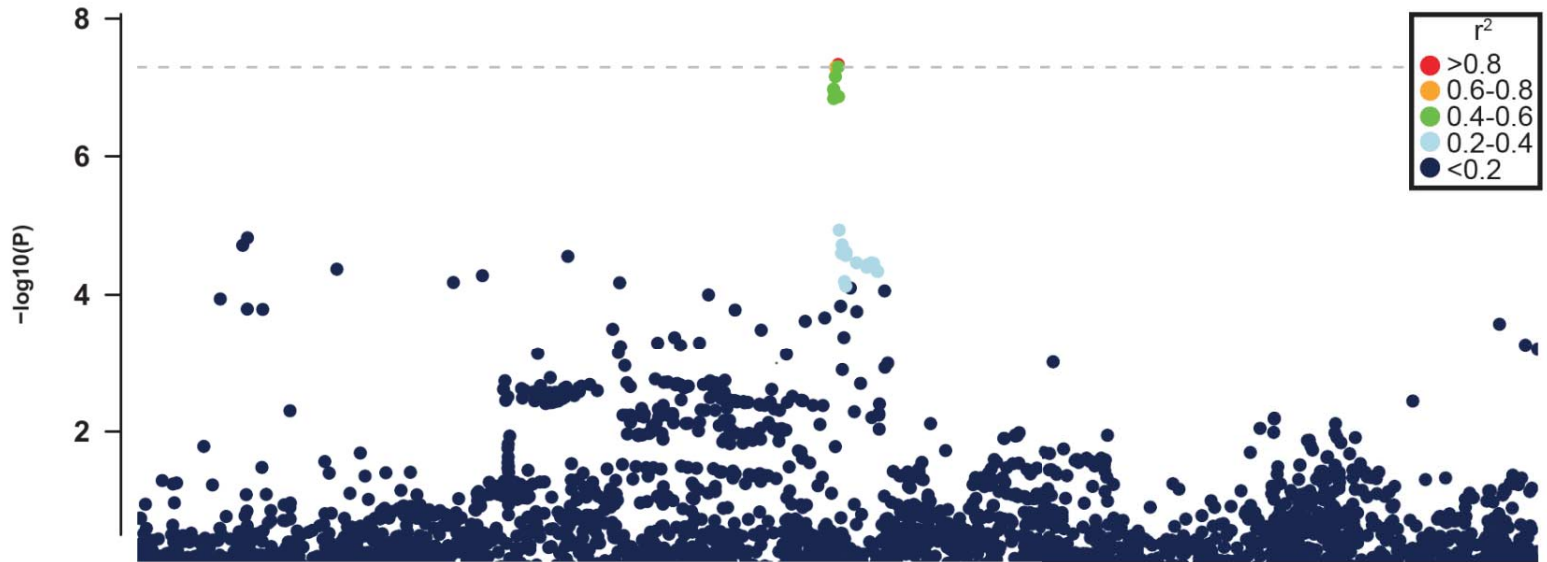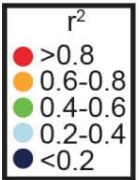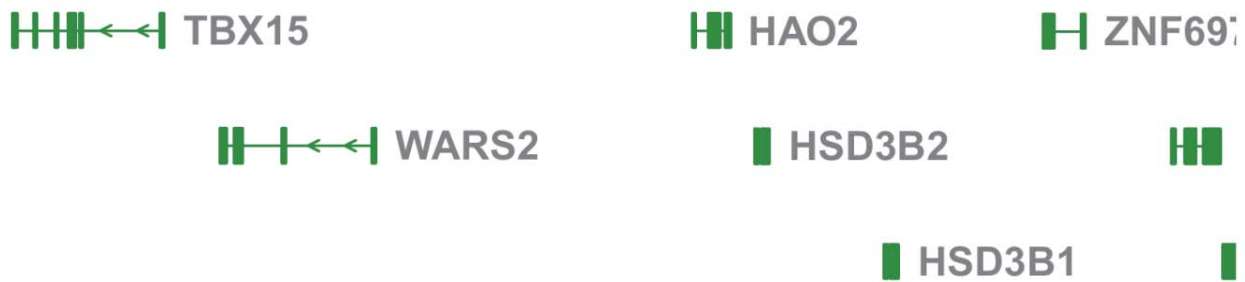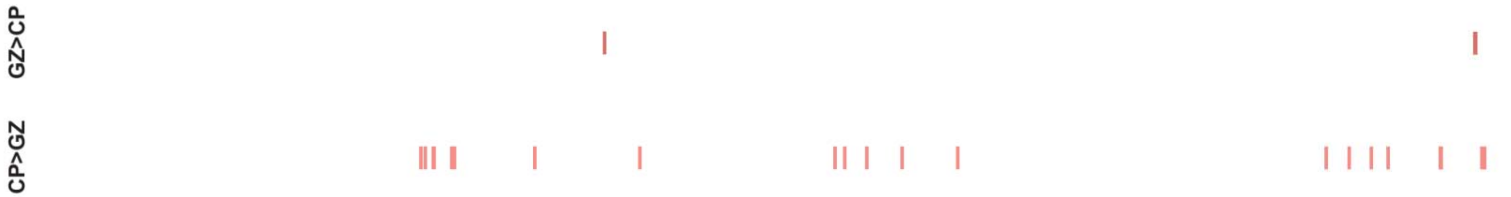

Corrected for total SA

Uncorrected

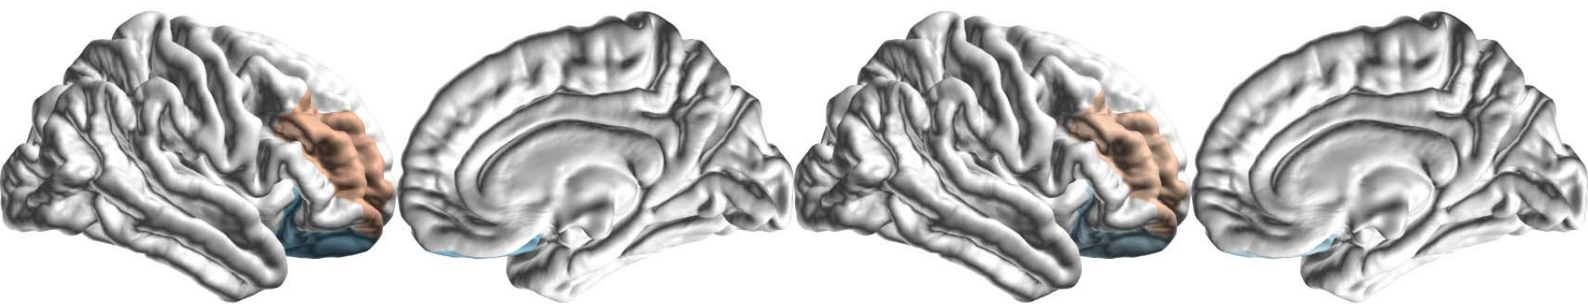

Zscore of the effect allele: T

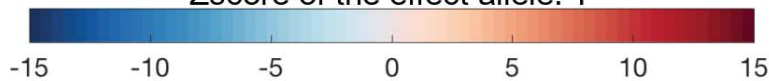



# Lateral Orbitofrontal SA: rs2184968

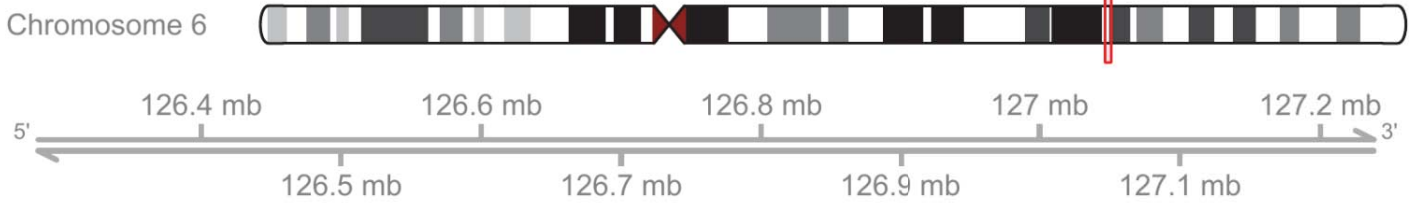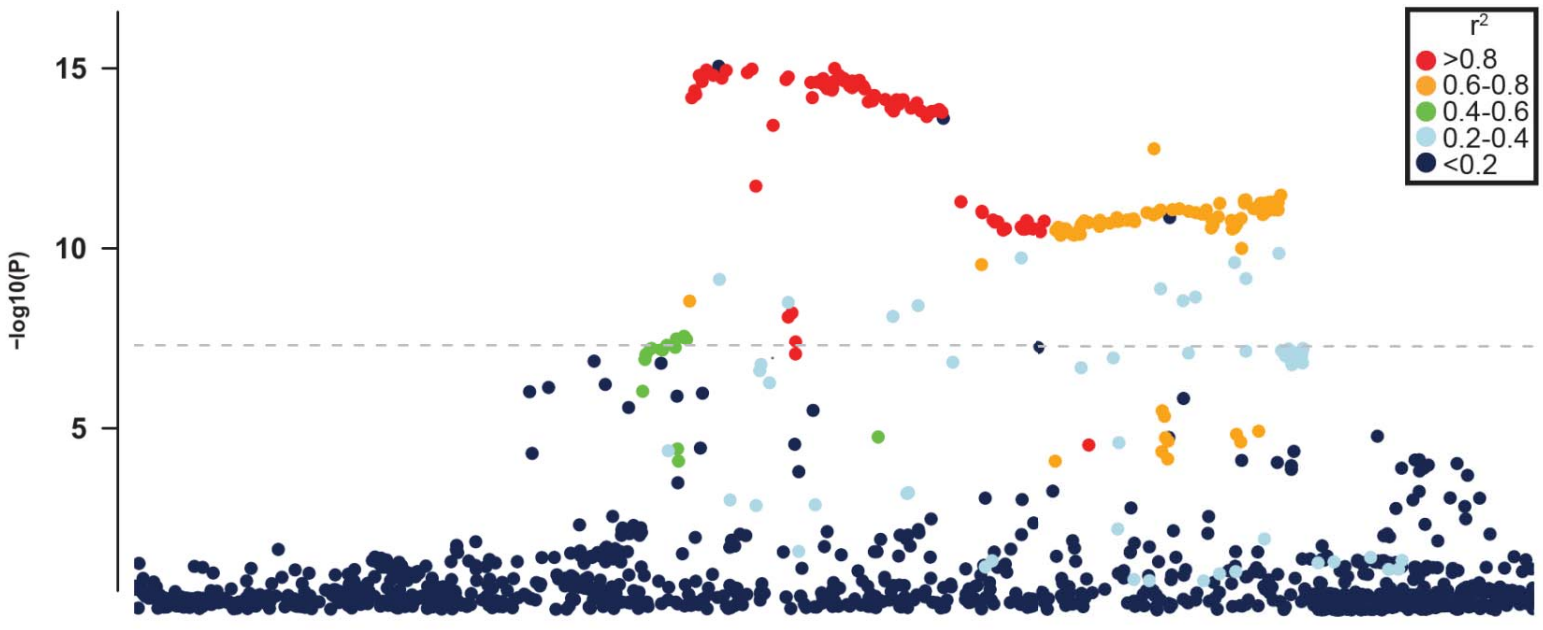

HINT3

CENPW

TRMT11

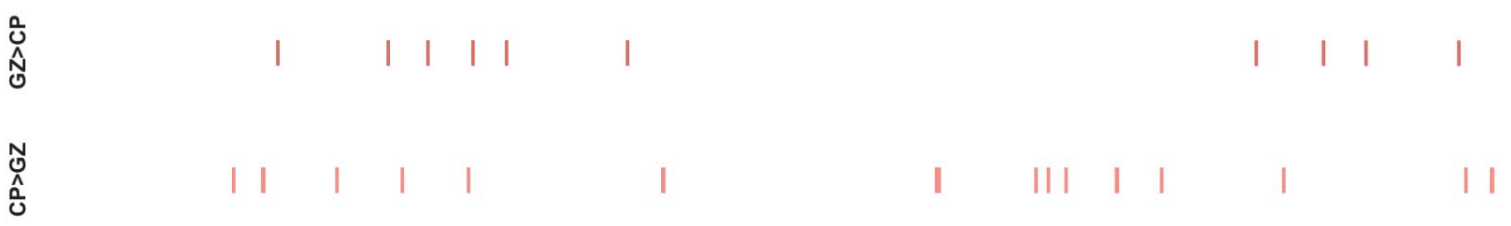

Corrected for total SA

Uncorrected

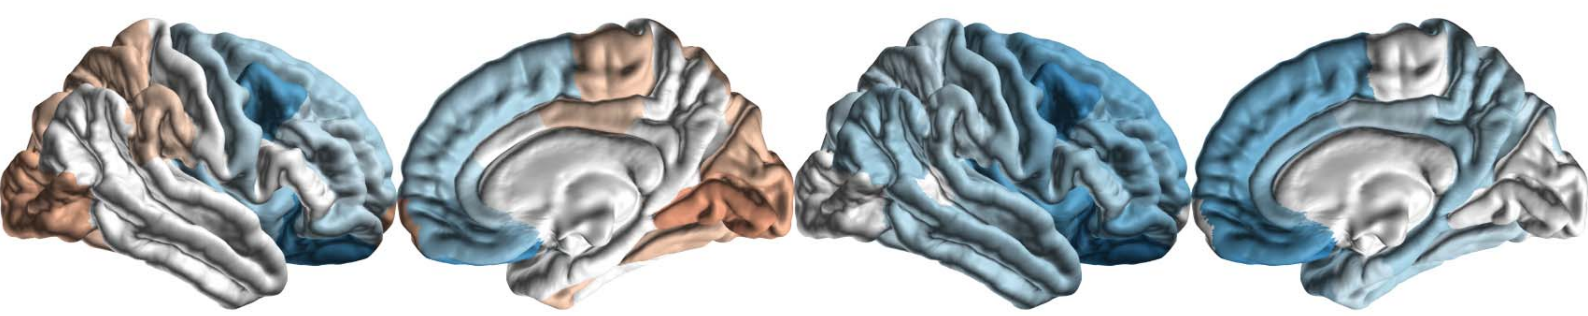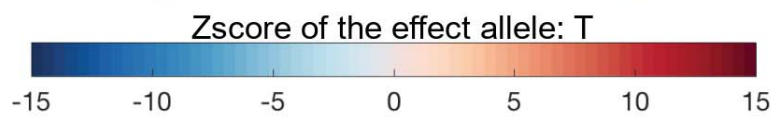

# Lateral Orbitofrontal SA: rs4721802

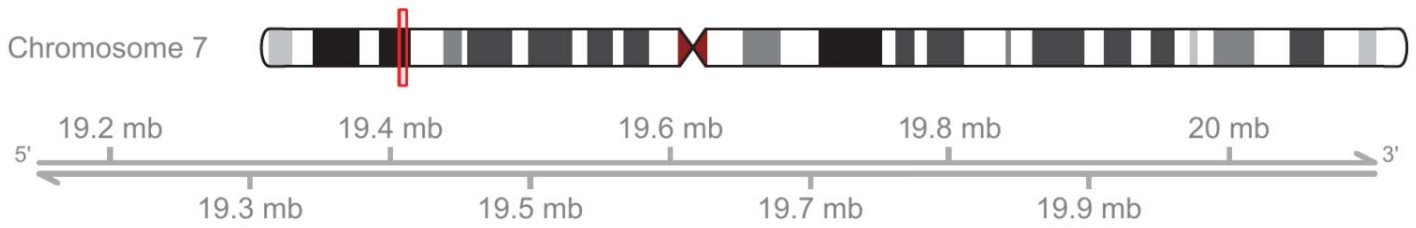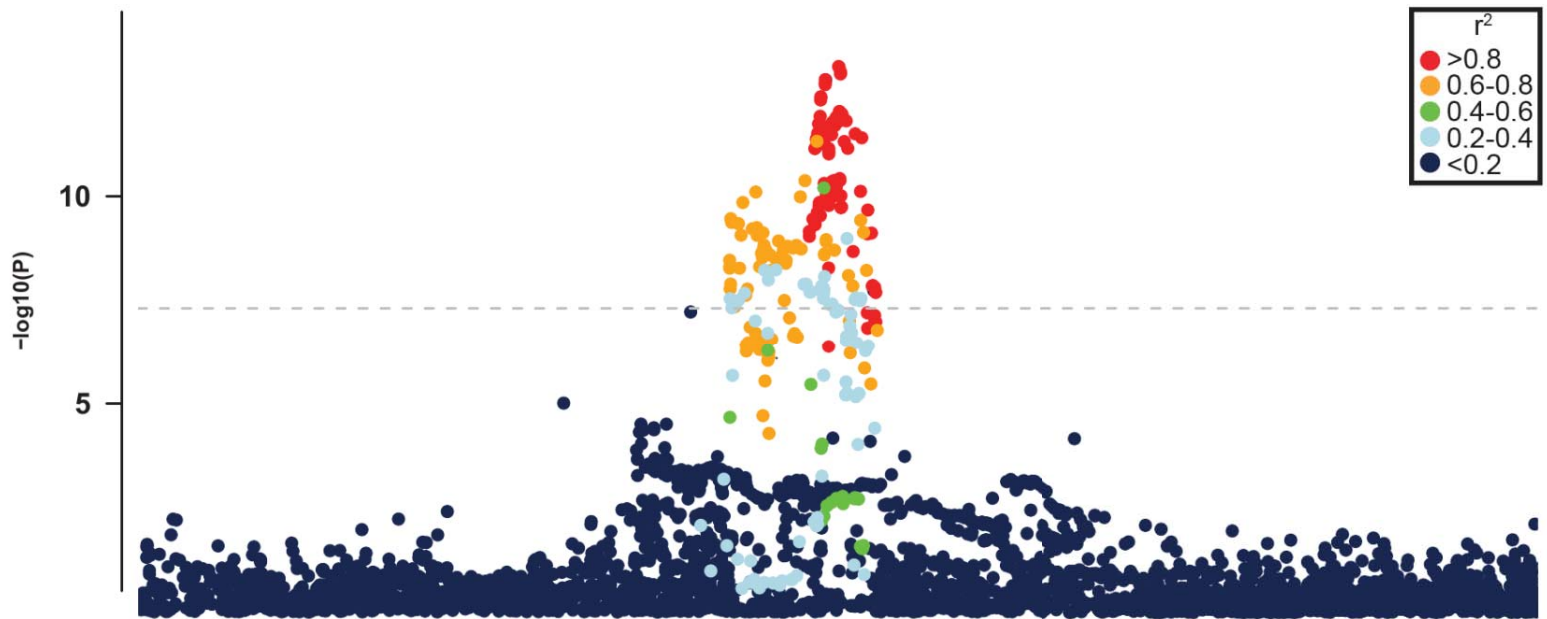

TWIST1

TWISTNB

FERD3L

TMEM196

GZ>CP

CP>GZ

Corrected for total SA

Uncorrected

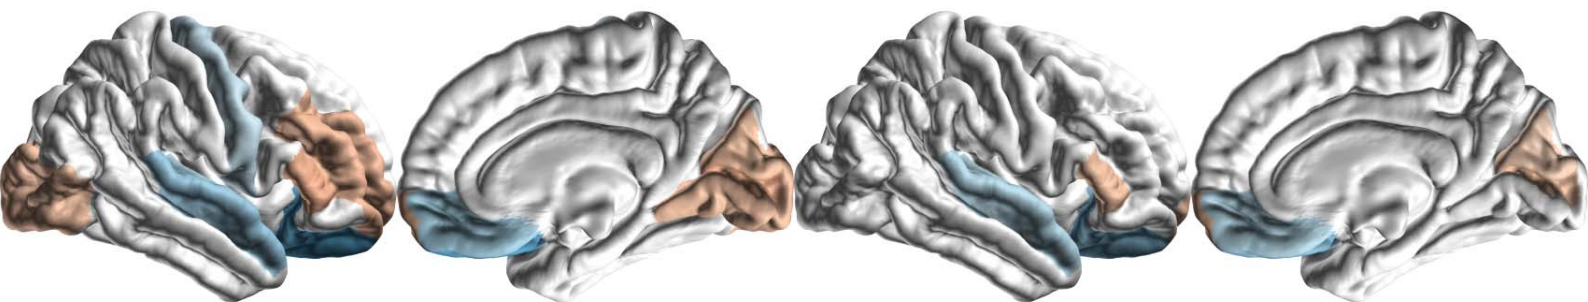

Zscore of the effect allele: A

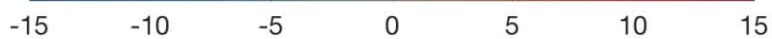

# Lateral Orbitofrontal SA: rs1822951

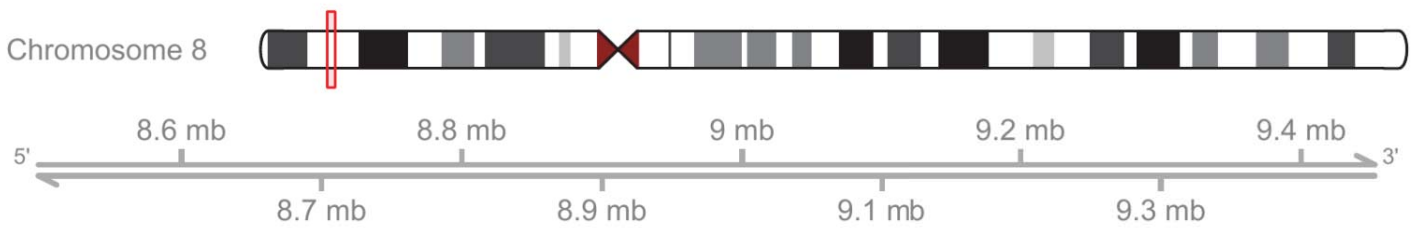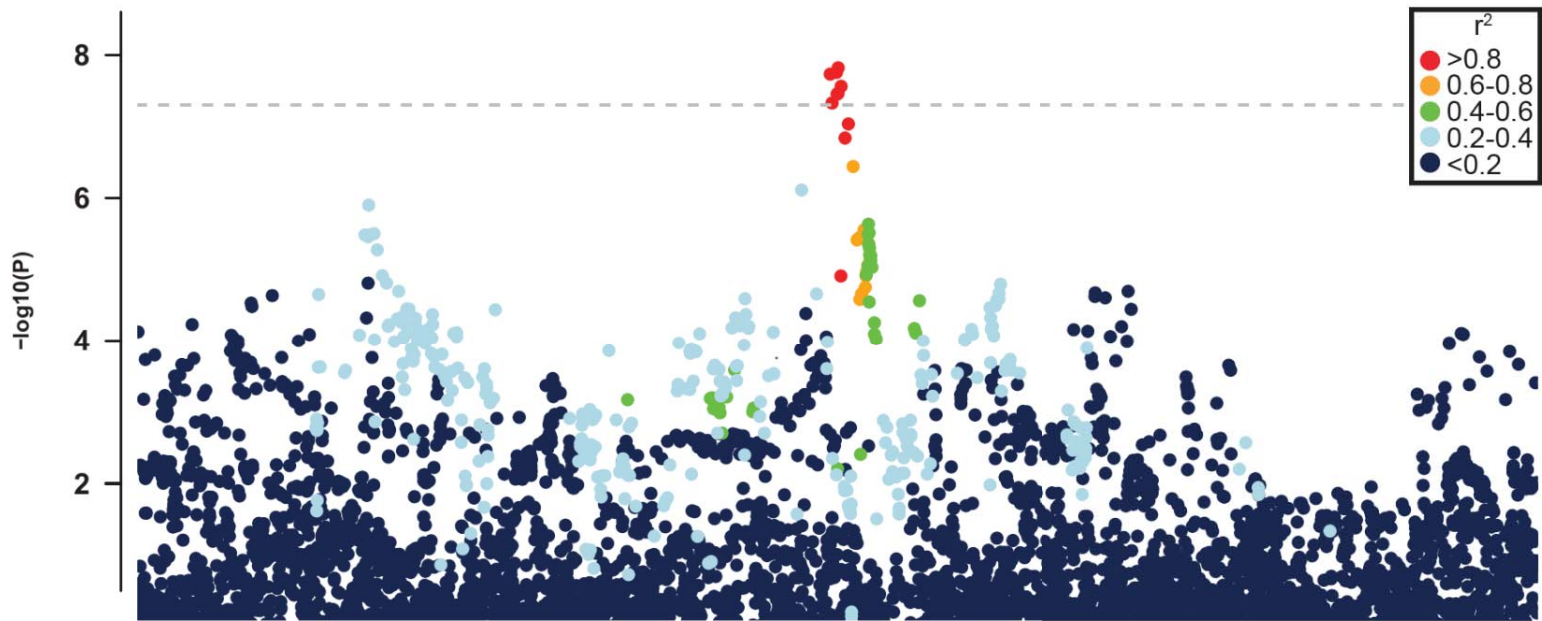

CLDN23

ERI1

MFHAS1

PPP1R3B

GZ>CP

CP>GZ

Corrected for total SA

Uncorrected

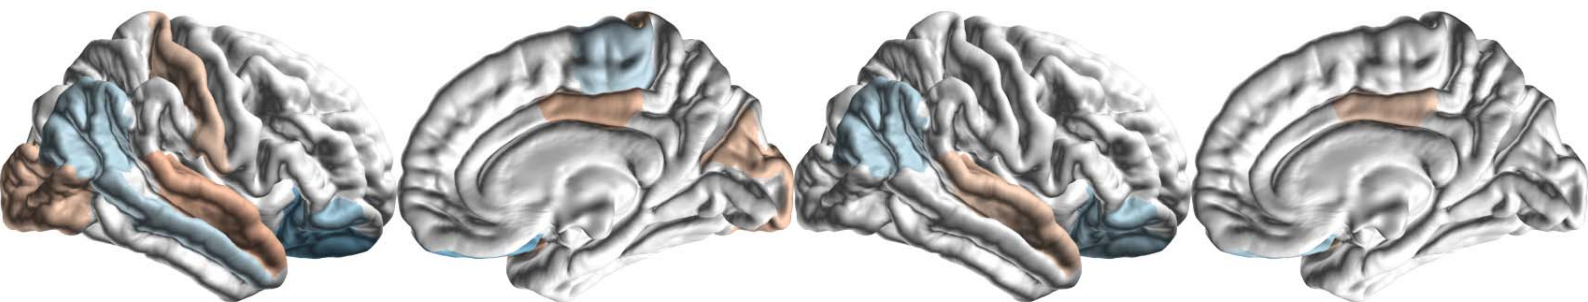

Zscore of the effect allele: A

-15 -10 -5 0 5 10 15



# Lateral Orbitofrontal SA: rs79487293

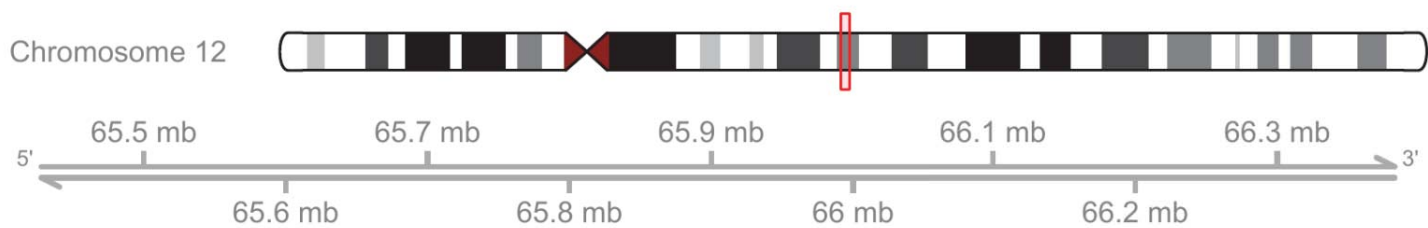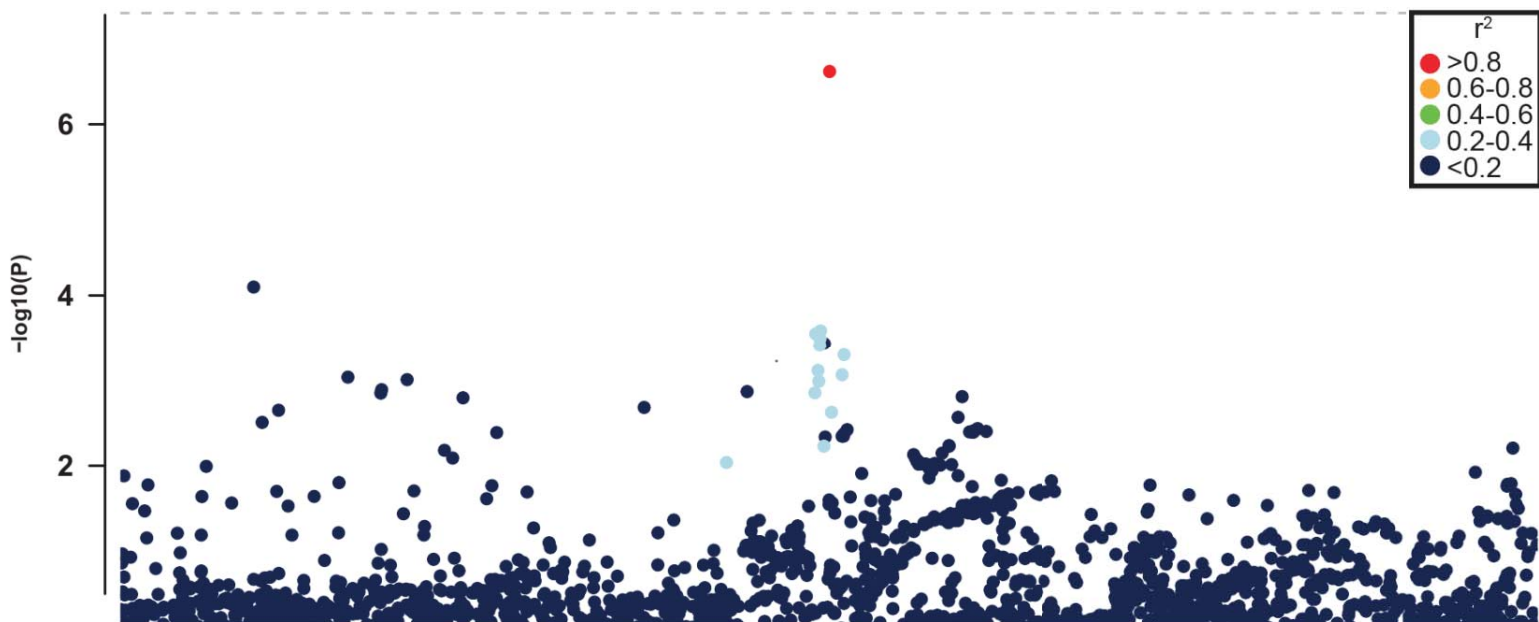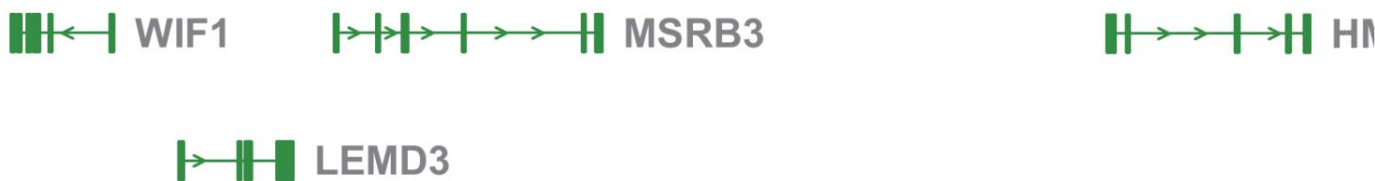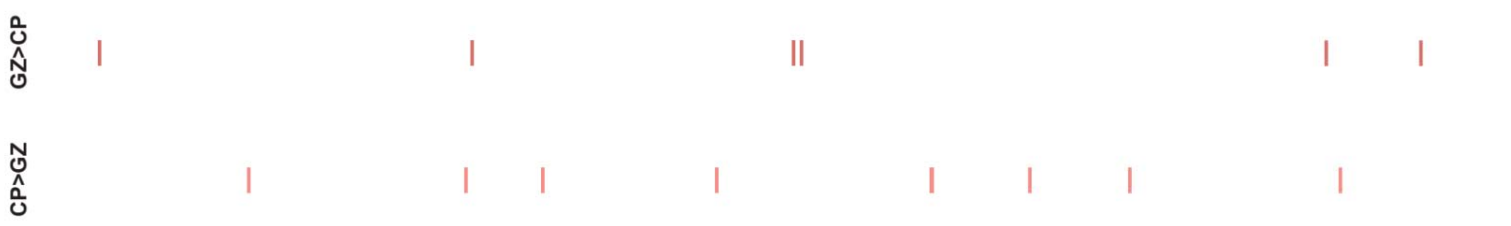

Corrected for total SA

Uncorrected

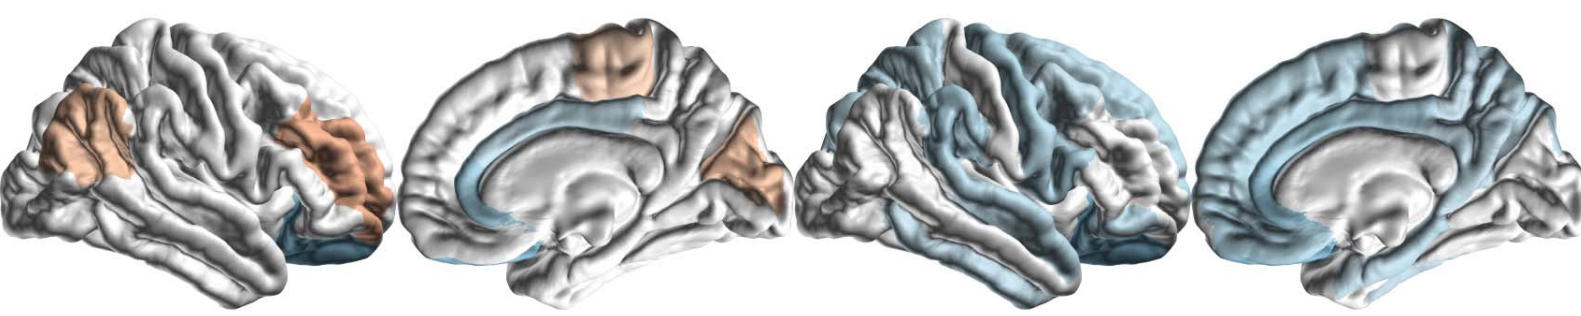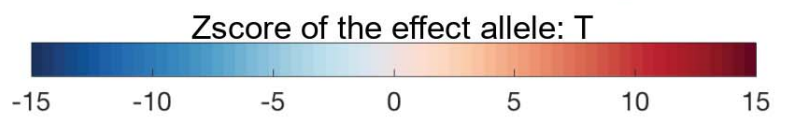

# Lateral Orbitofrontal SA: rs2358483

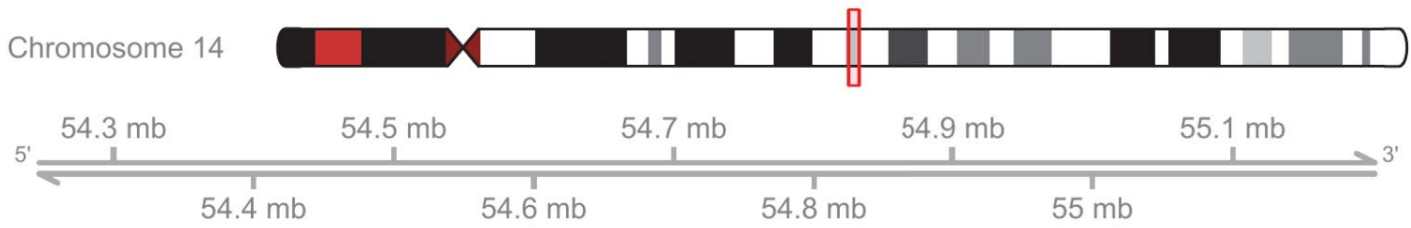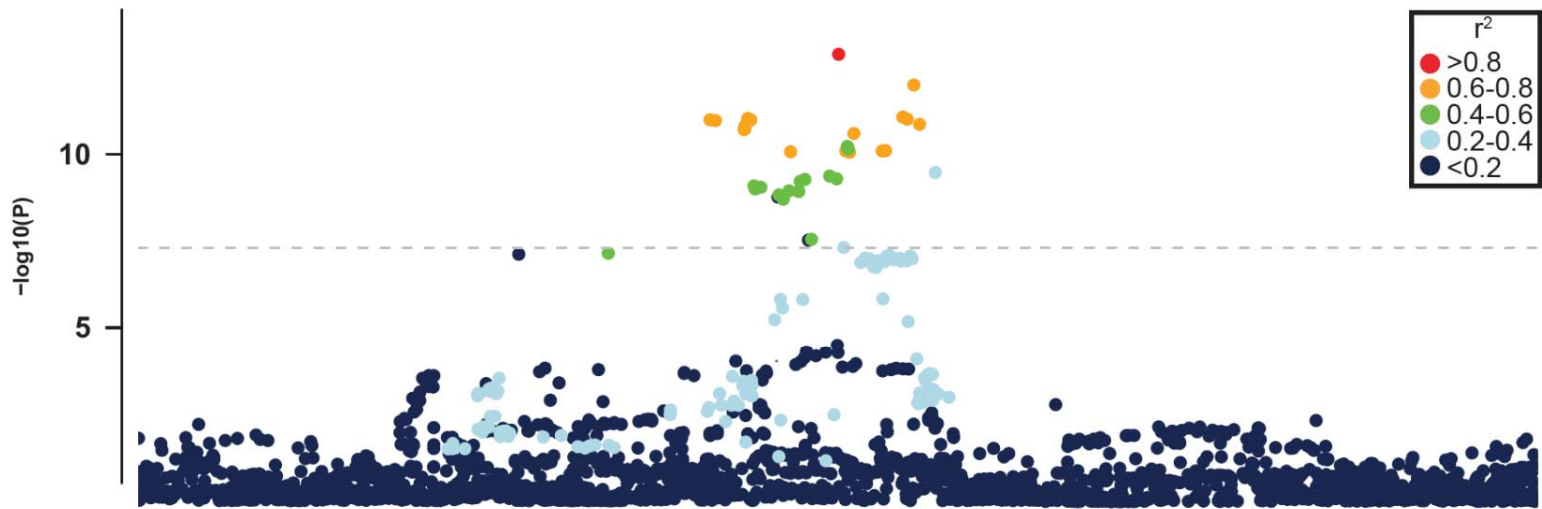

BMP4

CDKN3

CNIH1

GMFB

CGRRF1

CP>GZ

GZ>CP

Corrected for total SA

Uncorrected

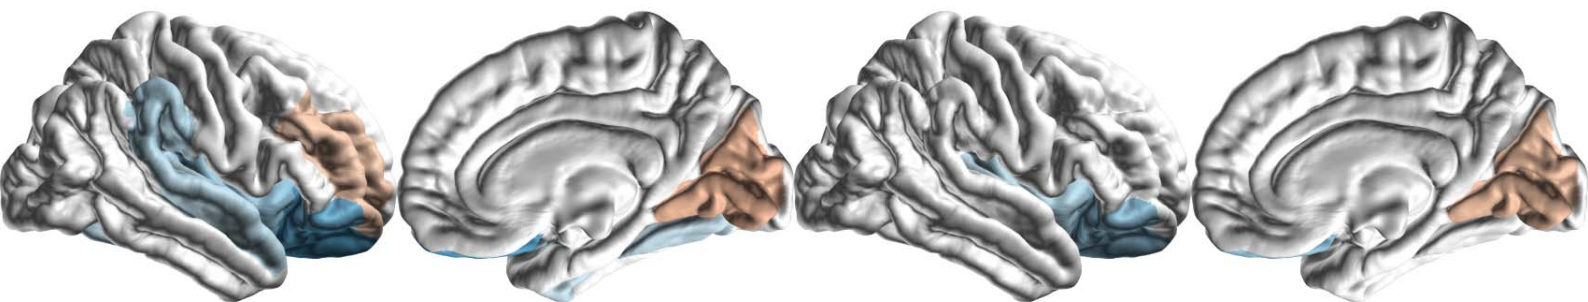

Zscore of the effect allele: T

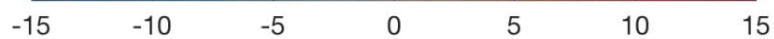

# Lateral Orbitofrontal SA: rs12626790

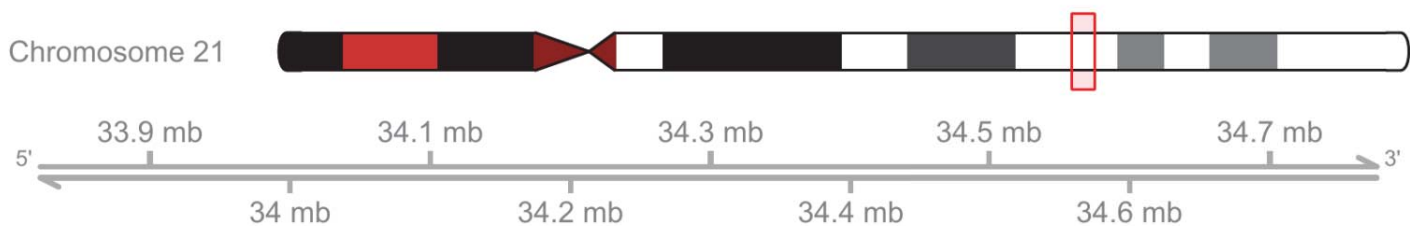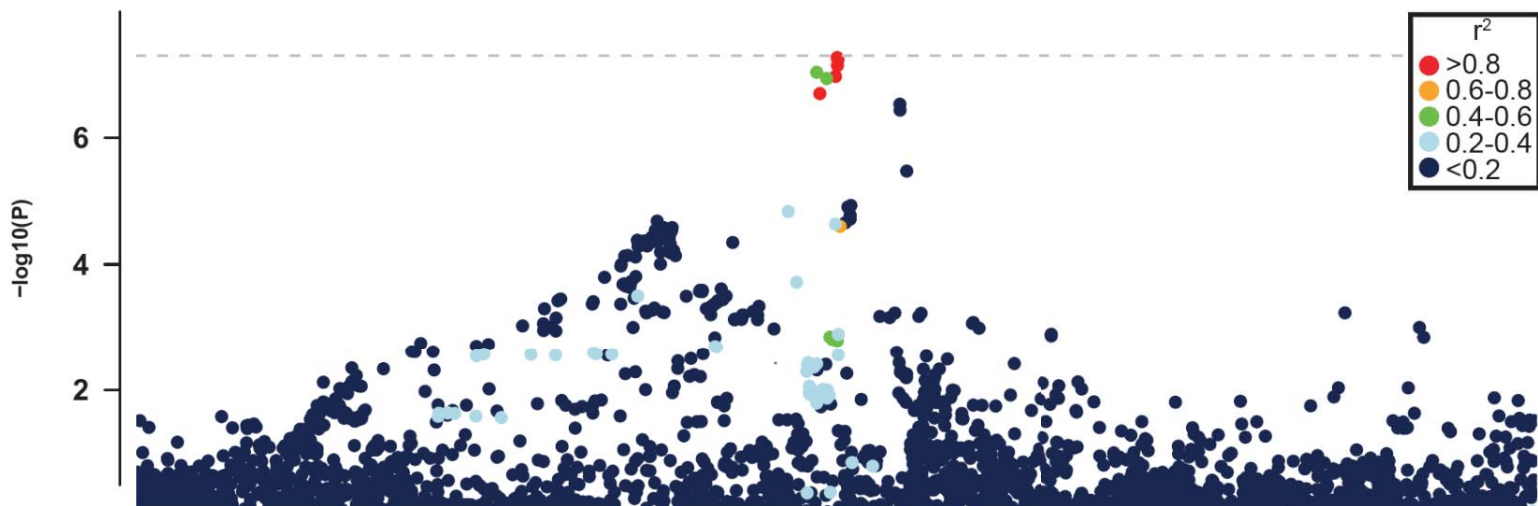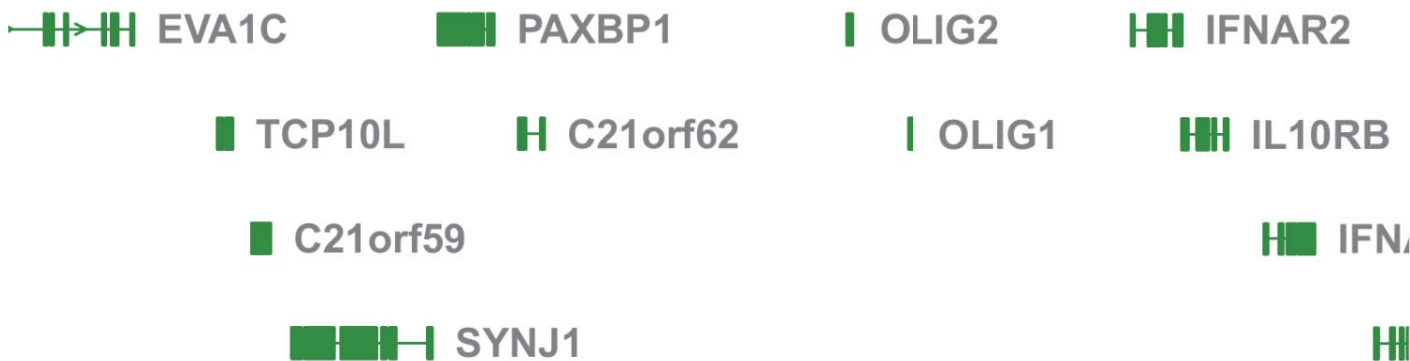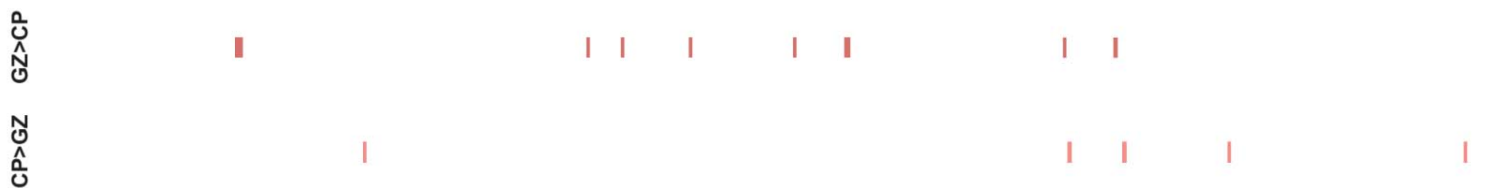

Corrected for total SA

Uncorrected

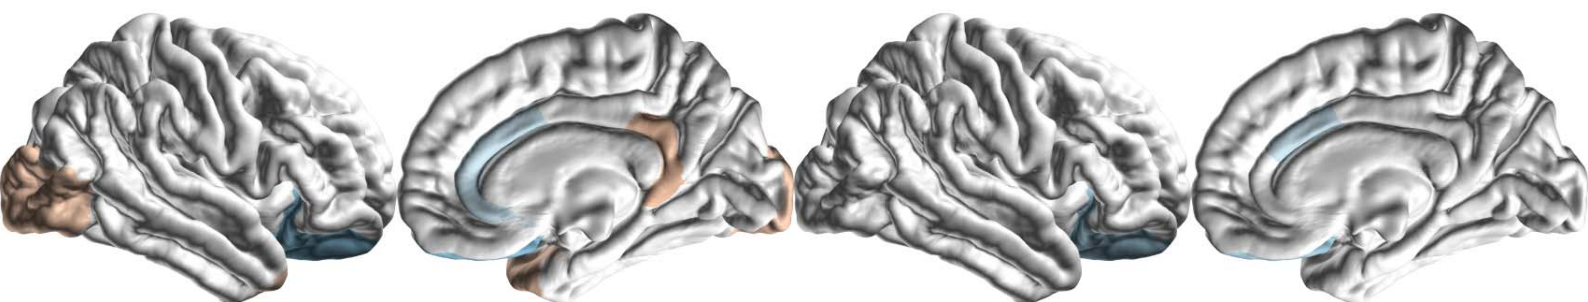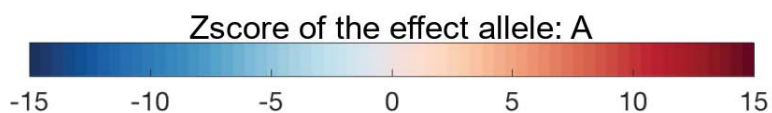



# Rostral Anterior Cingulate SA: rs7874287

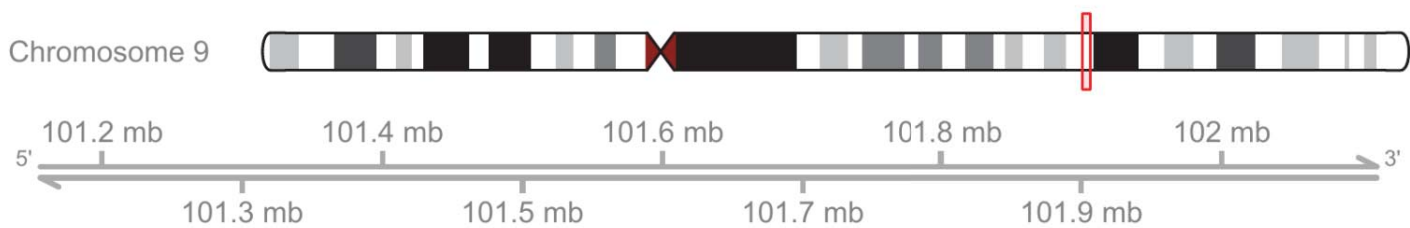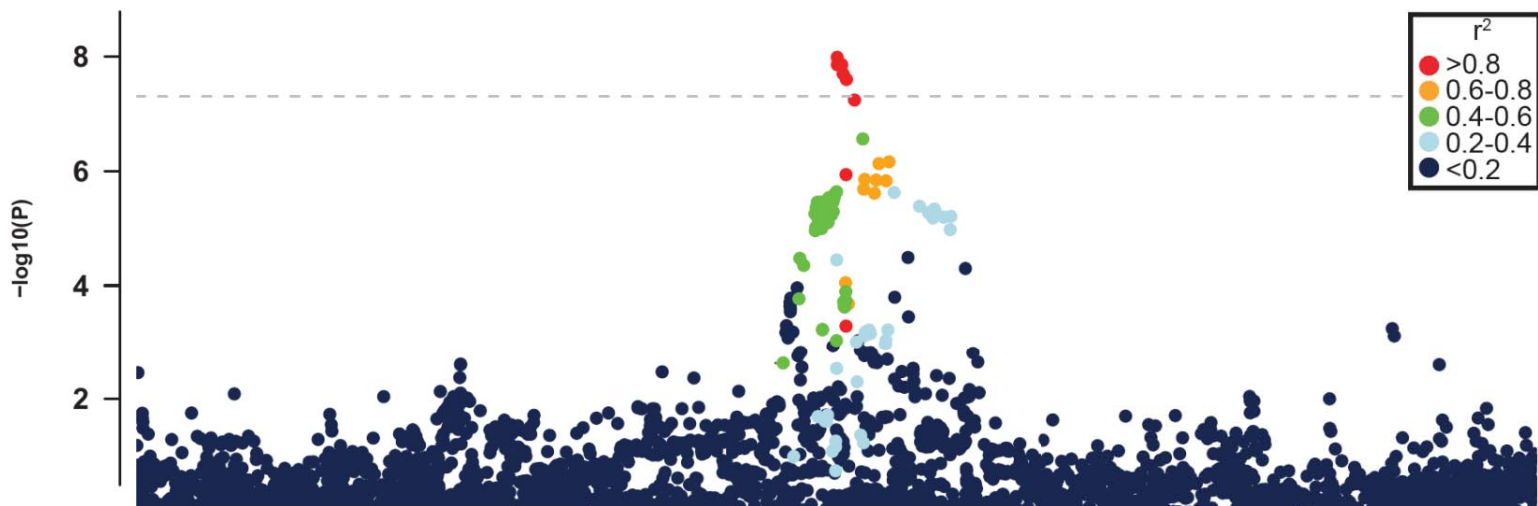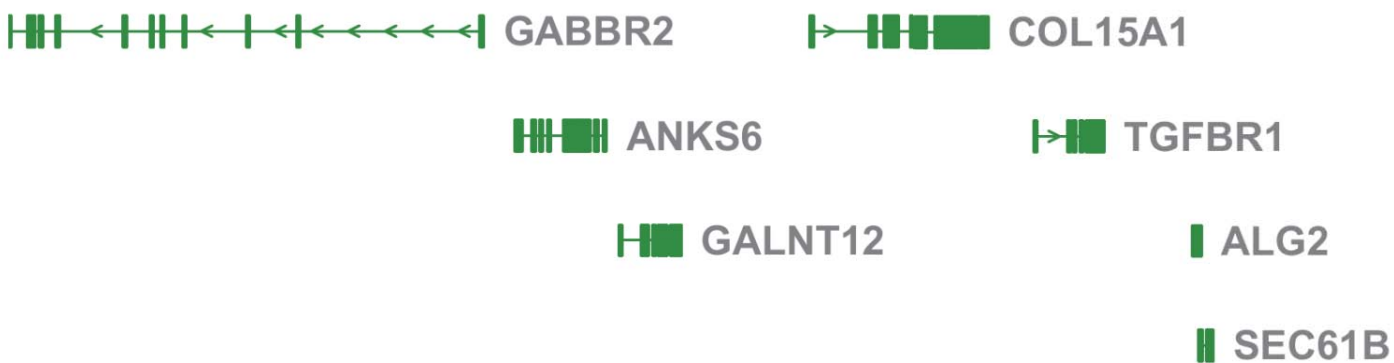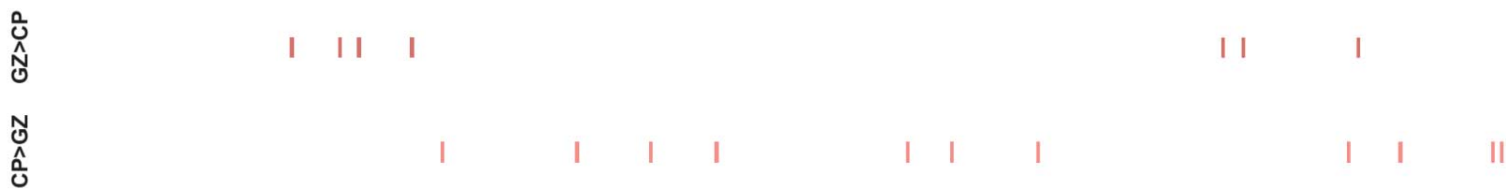

Corrected for total SA

Uncorrected

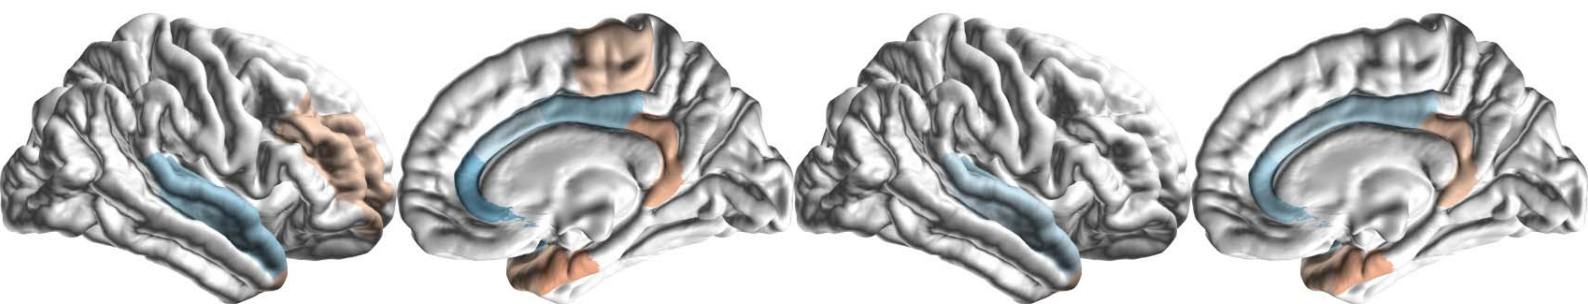

# Rostral Anterior Cingulate SA: rs1986012

Chromosome 15

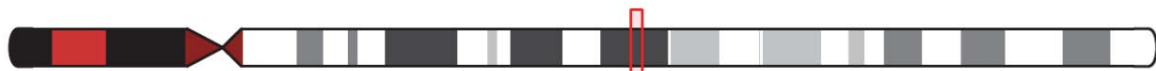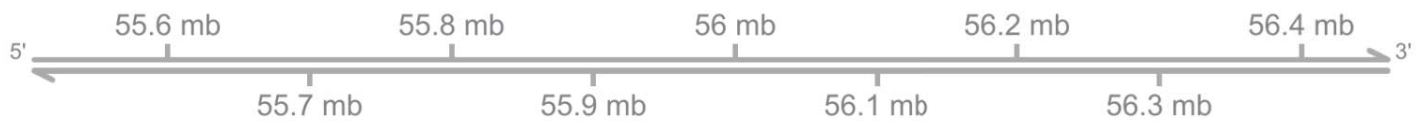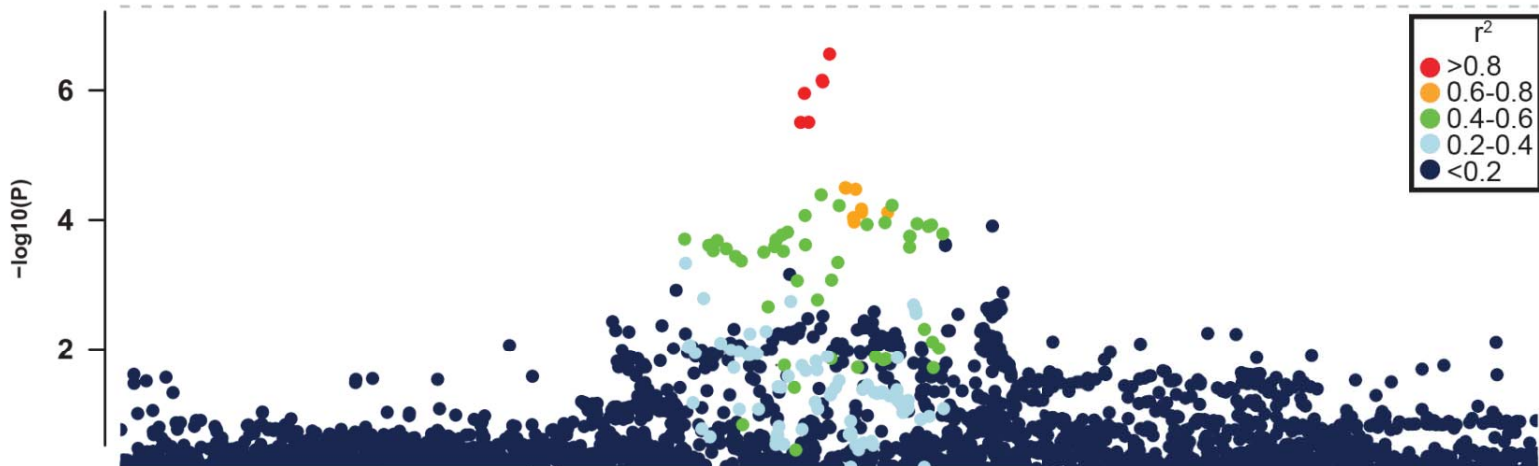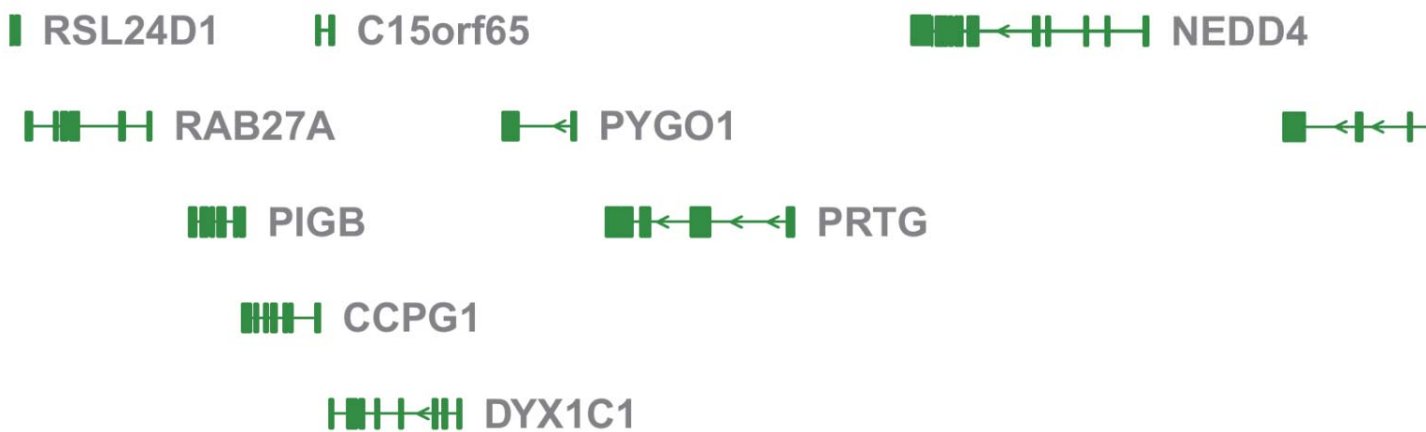

CP>GZ GZ>CP

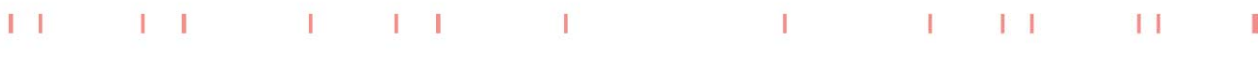

Corrected for total SA

Uncorrected

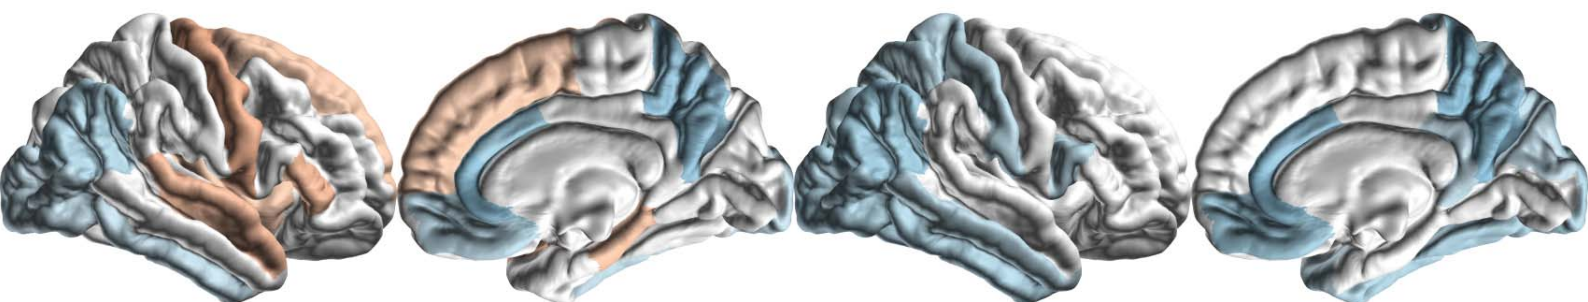

Zscore of the effect allele: T

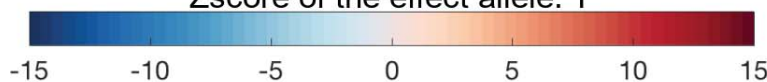



# Rostral Anterior Cingulate SA: rs2202895

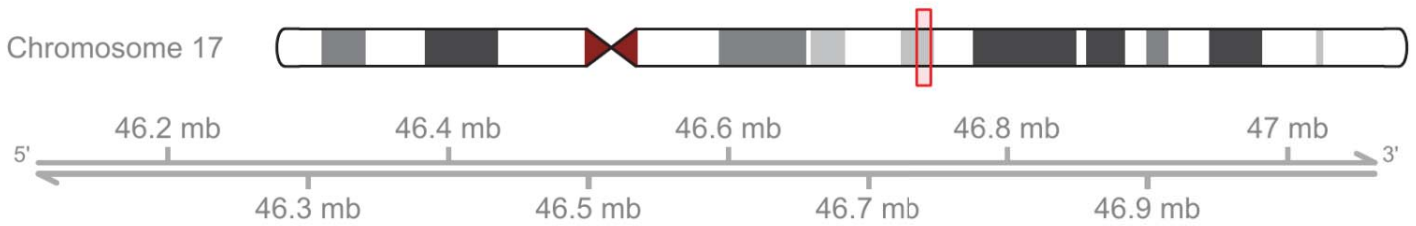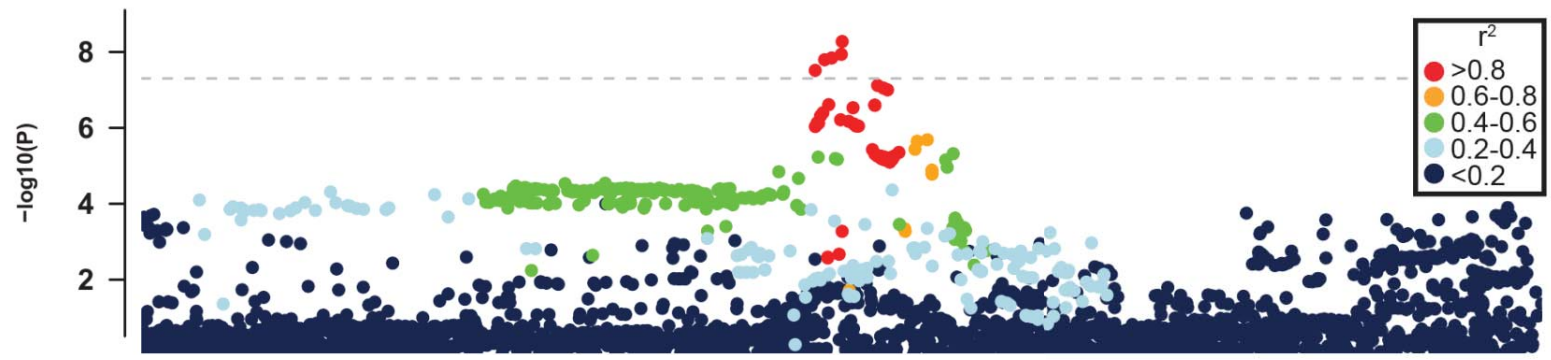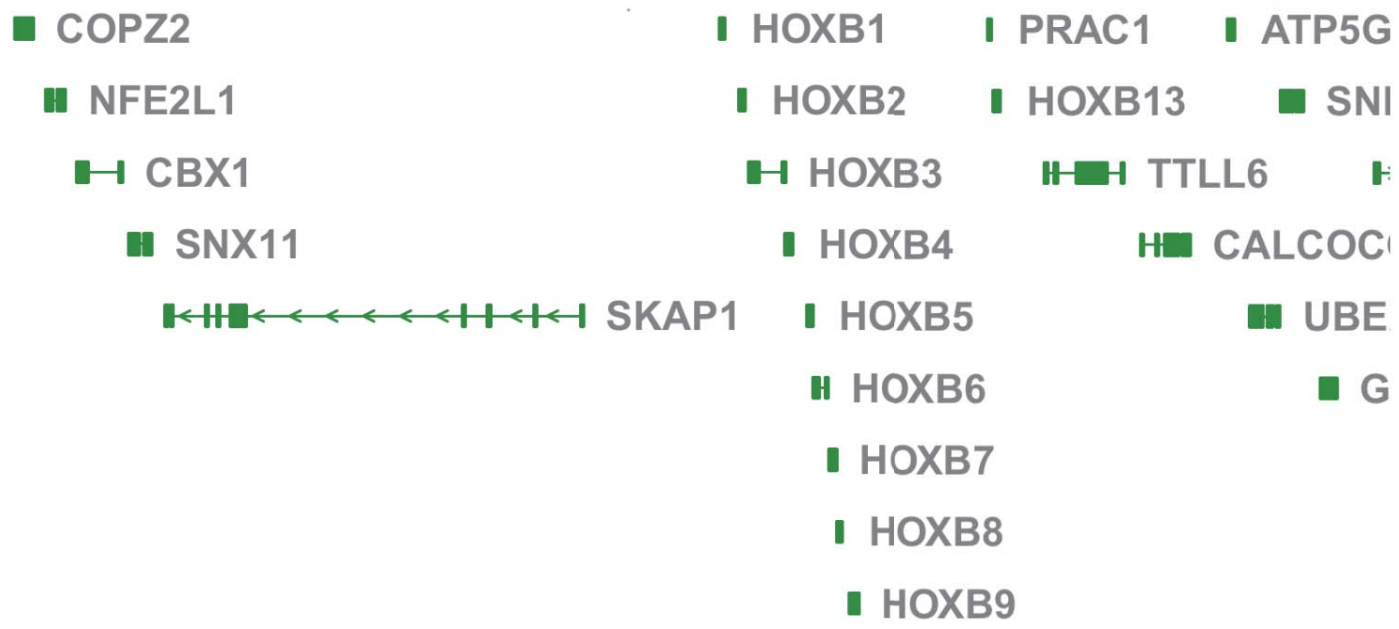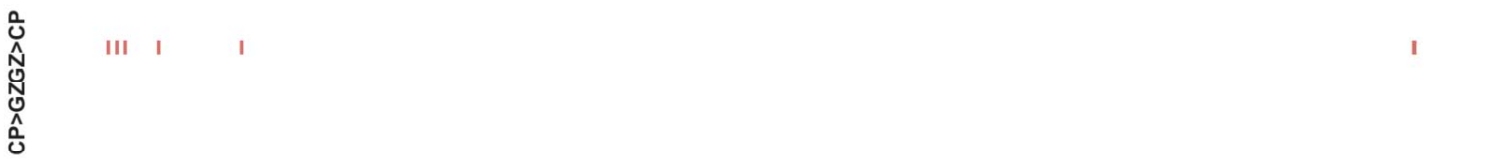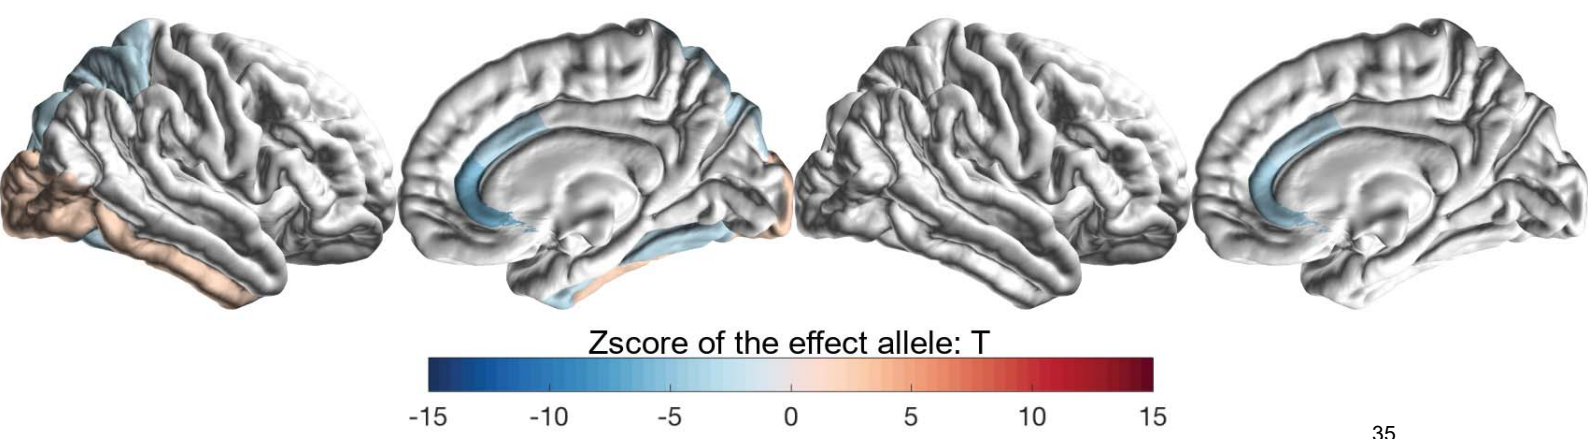

# Rostral Anterior Cingulate TH: rs4899448

Chromosome 14

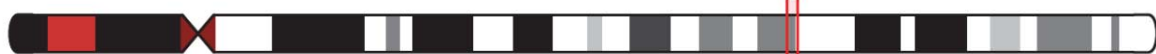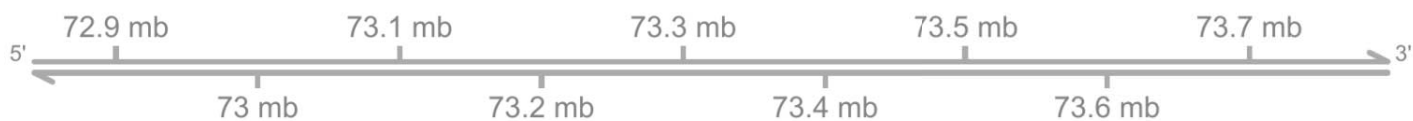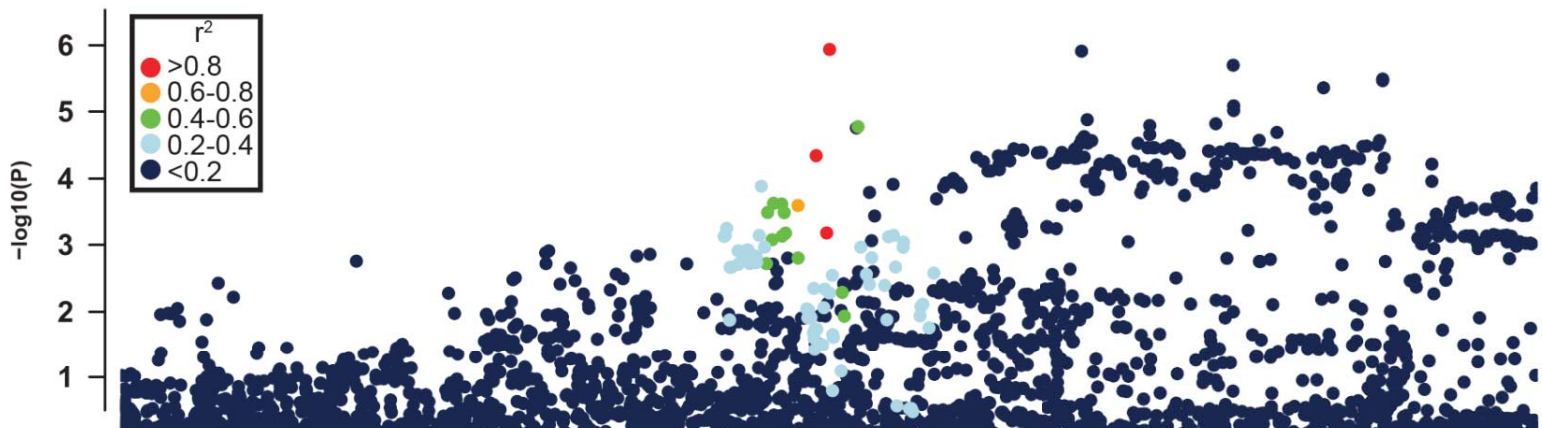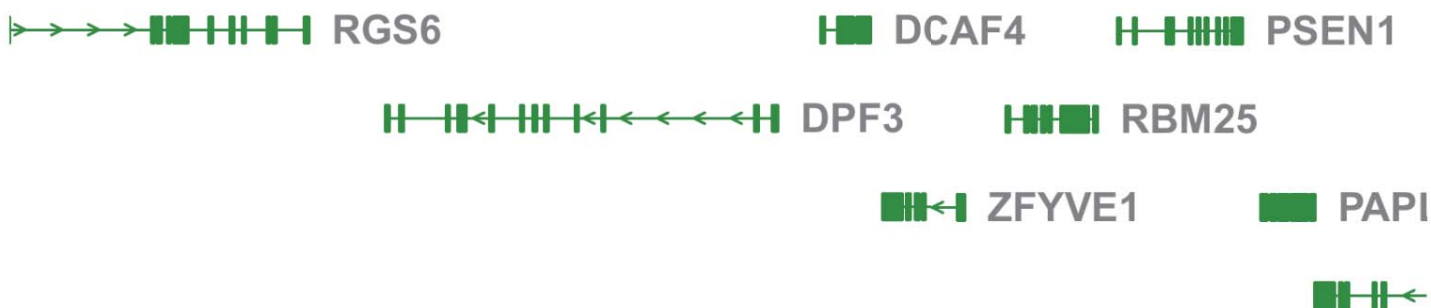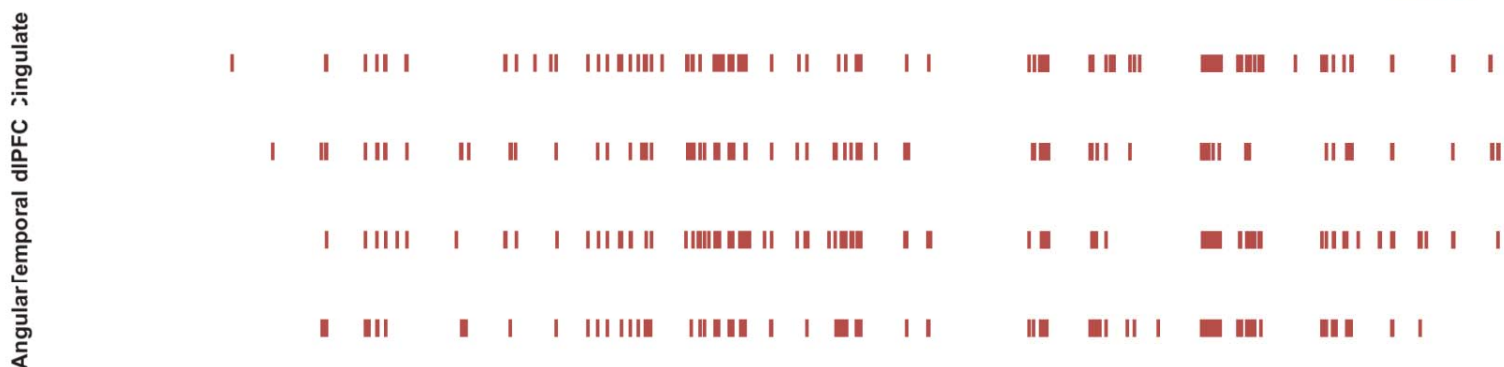

Corrected for average TH

Uncorrected

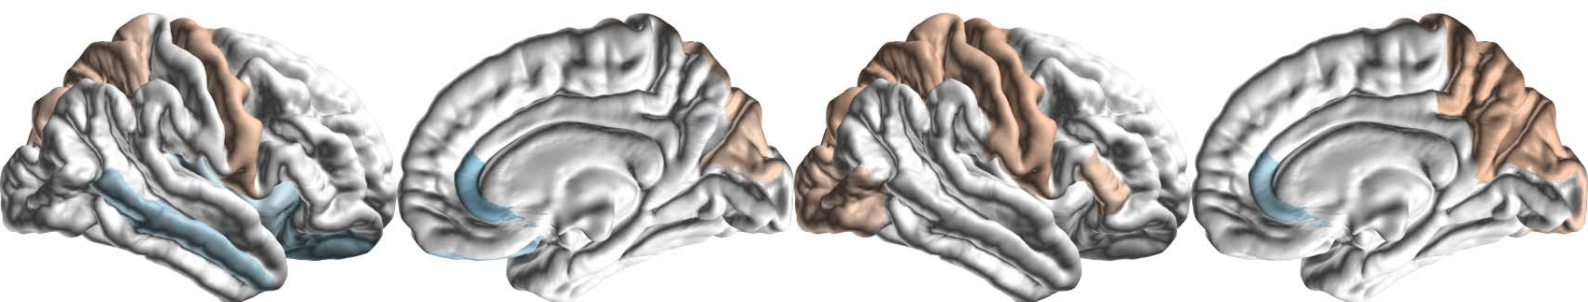

# Rostral Anterior Cingulate TH: rs62115964

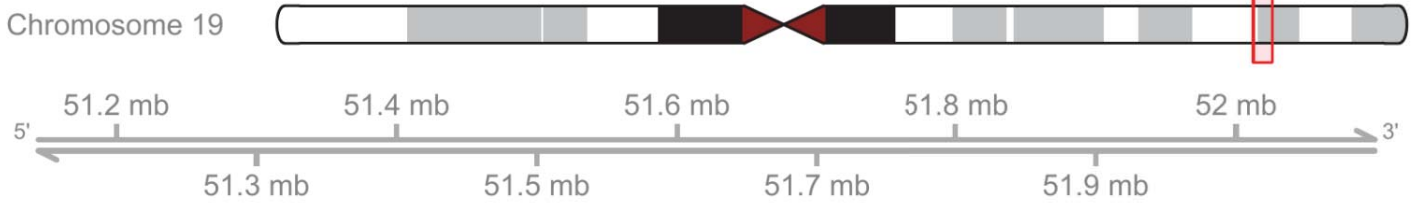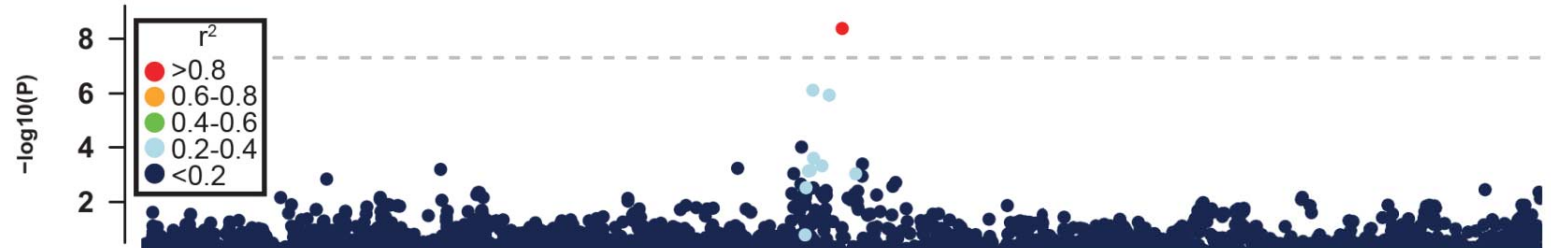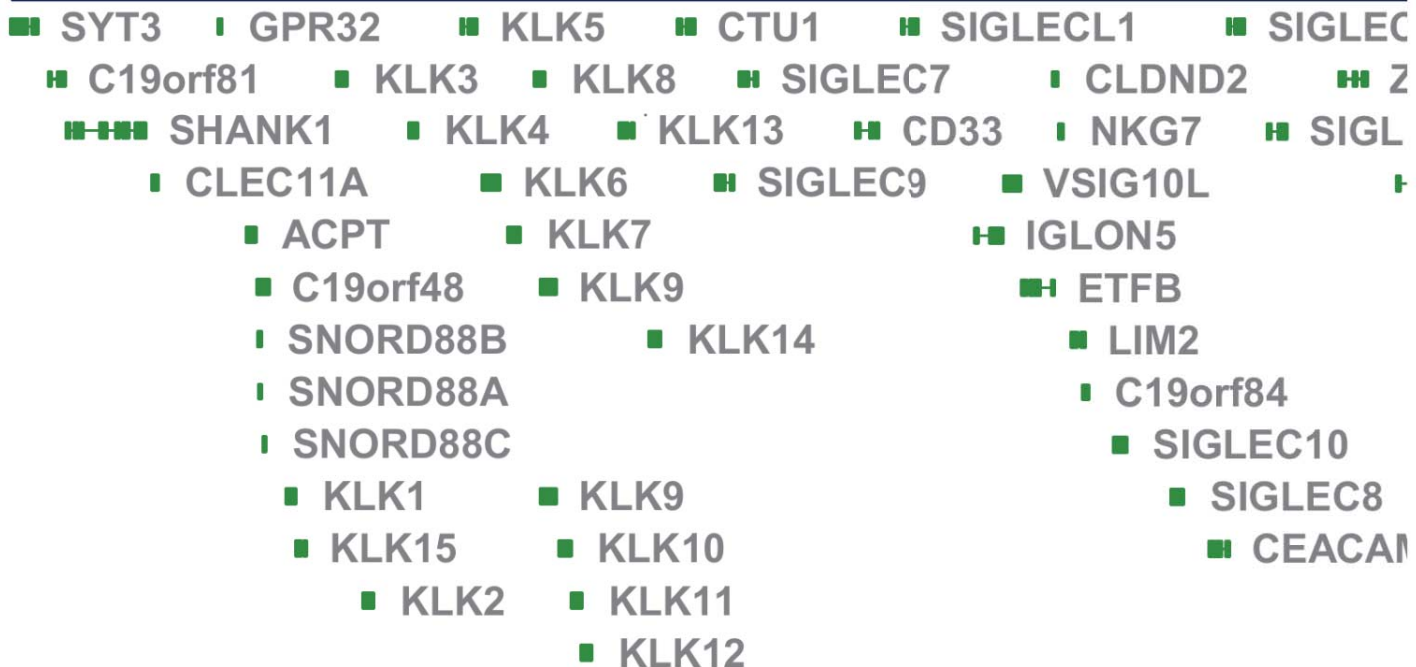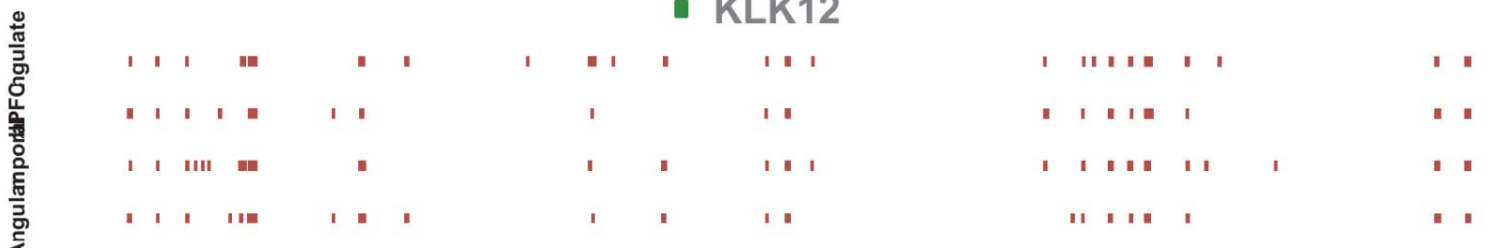

Corrected for average TH

Uncorrected

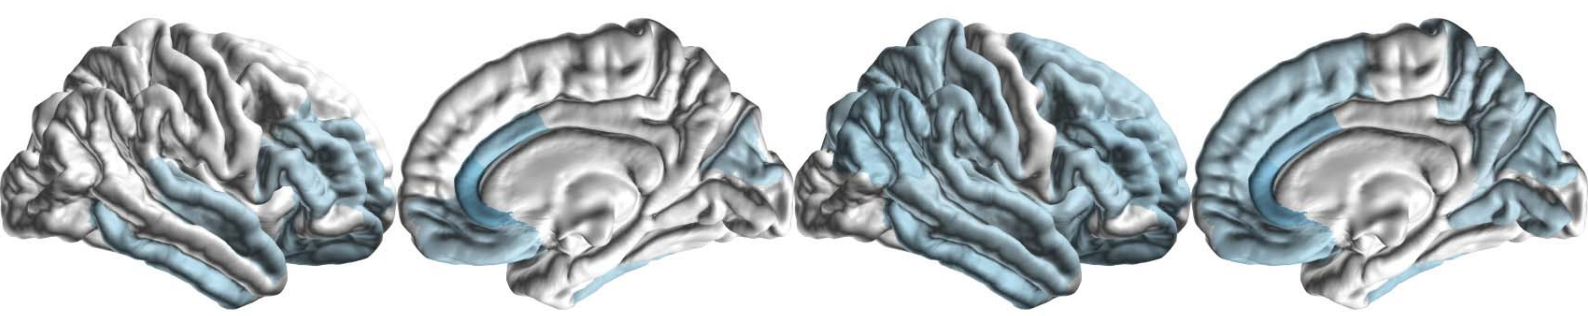

Zscore of the effect allele: A

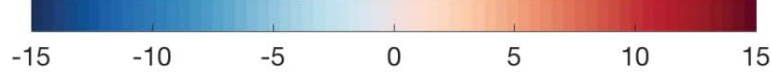



# Caudal Anterior Cingulate SA: rs13021985

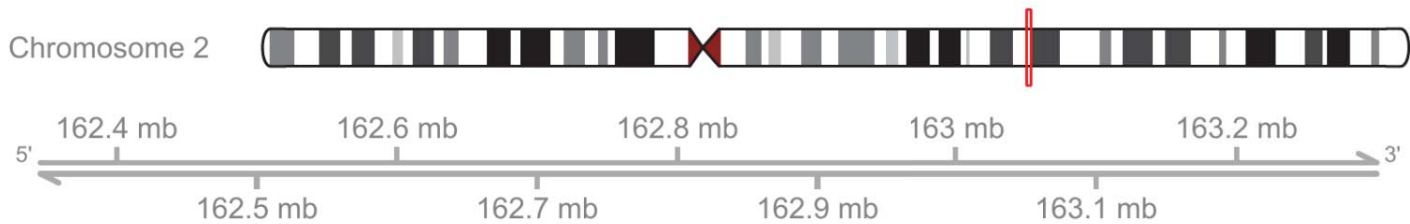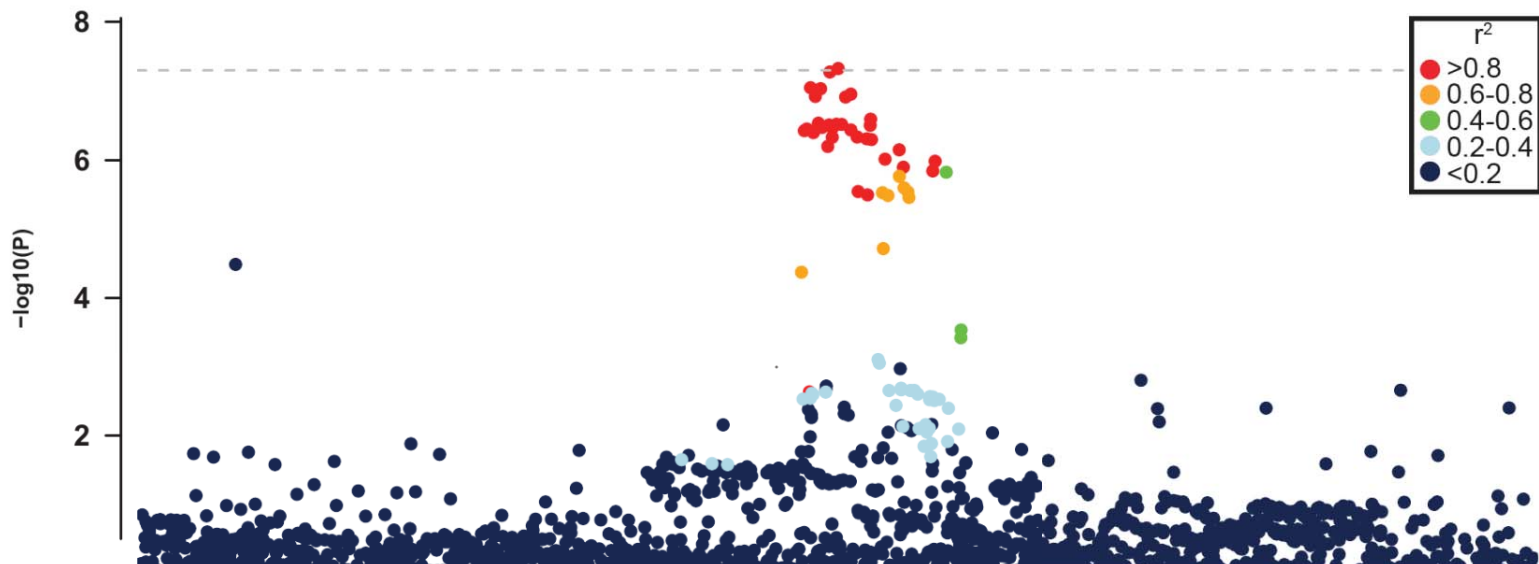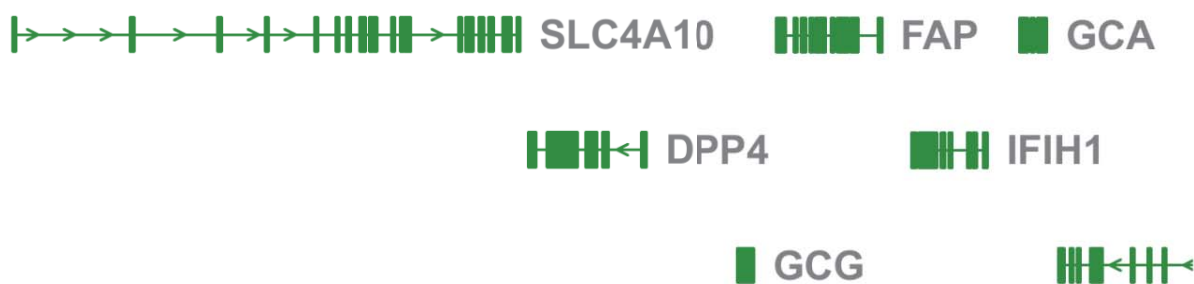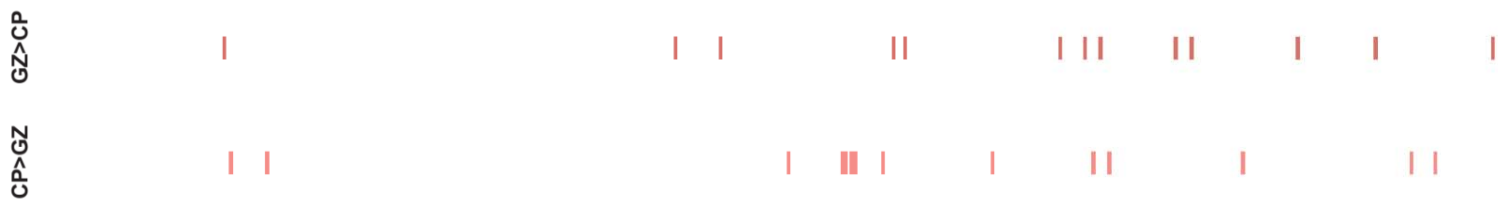

Corrected for total SA

Uncorrected

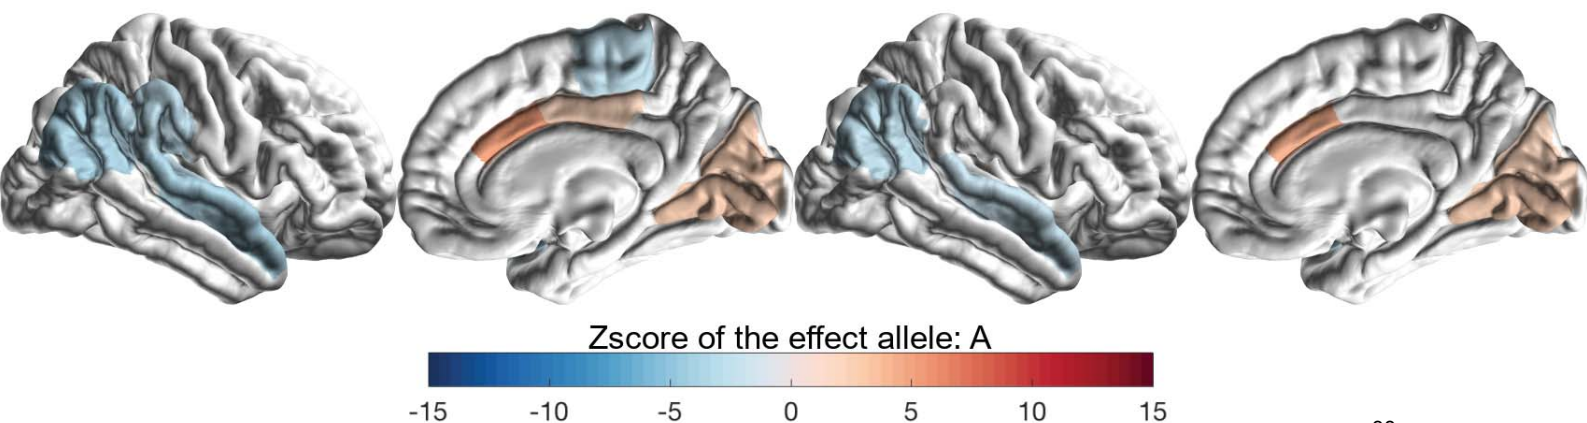



# Caudal Anterior Cingulate SA: rs7728751

Chromosome 5

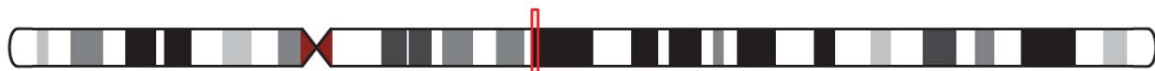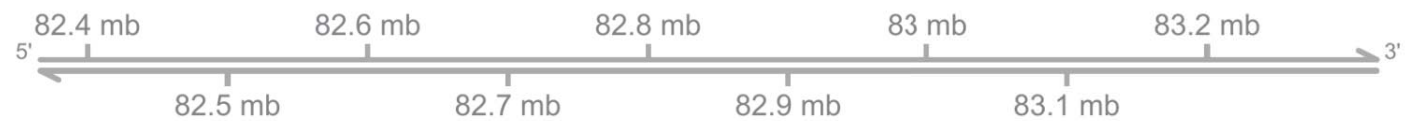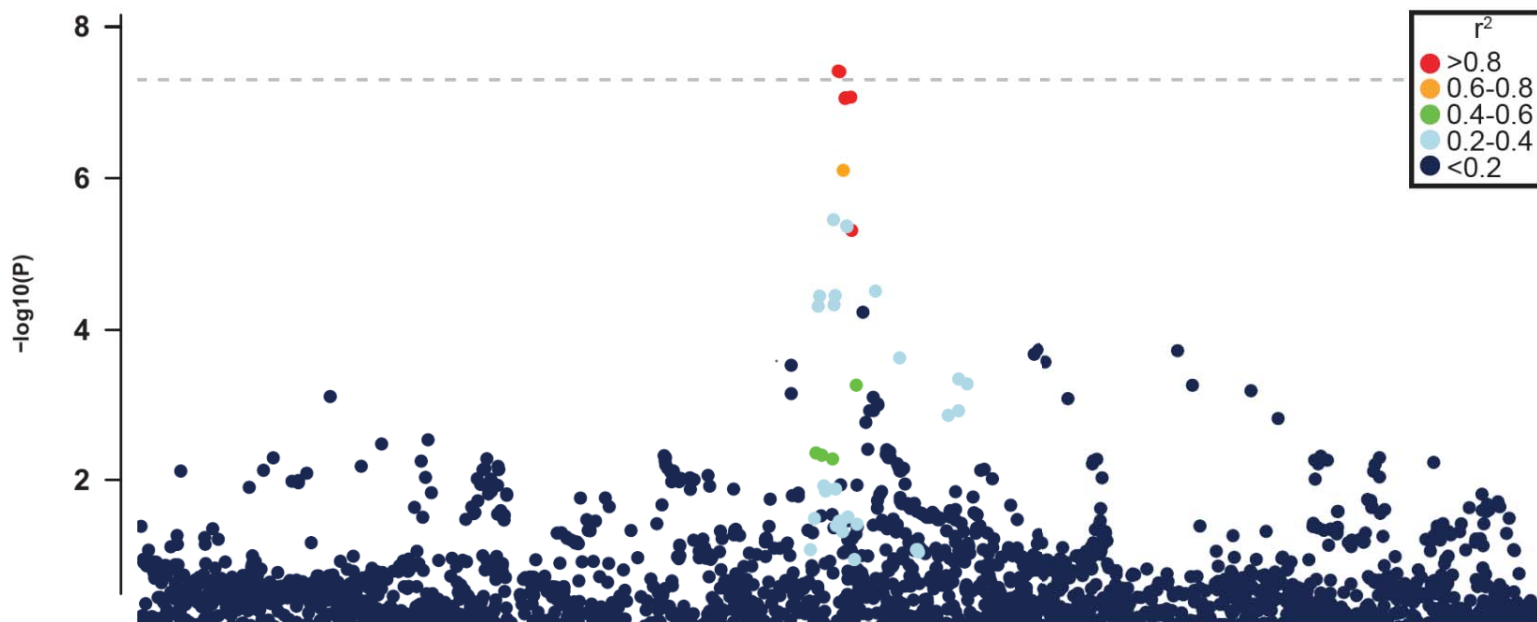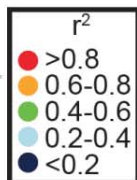

TMEM167A

VCAN

HAPLN1

XRCC4

HAPLN1

GZ>CP

CP>GZ

Corrected for total SA

Uncorrected

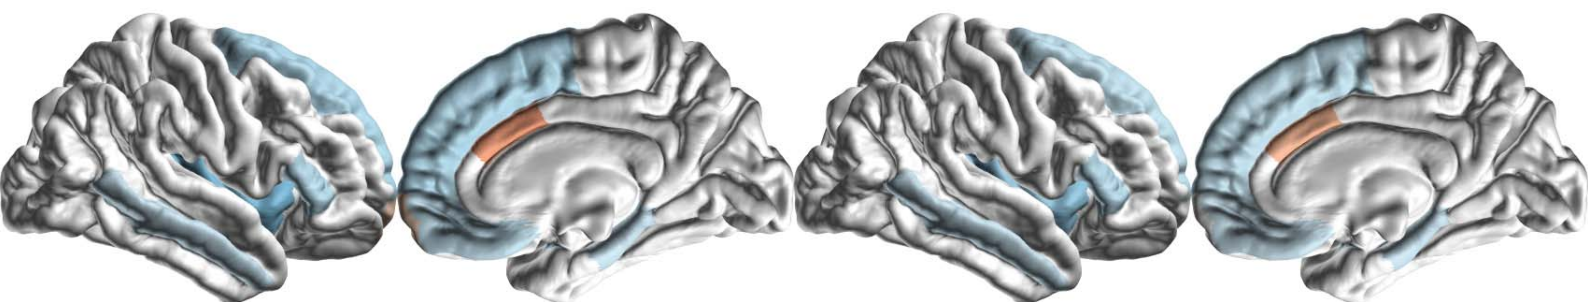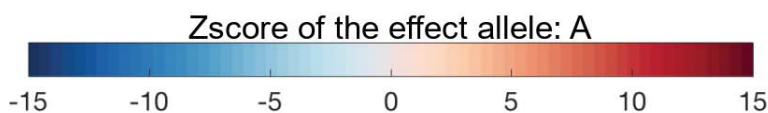

# Caudal Anterior Cingulate SA: rs80241863

Chromosome 16

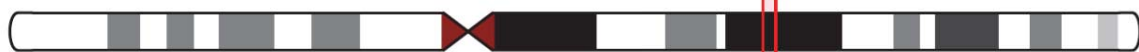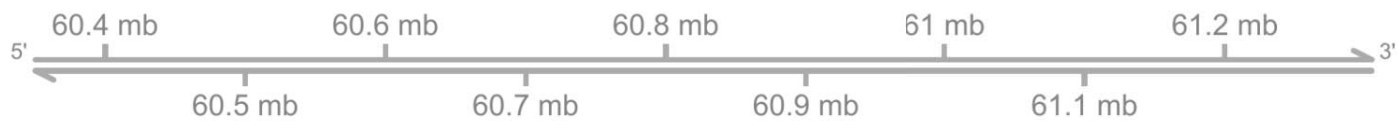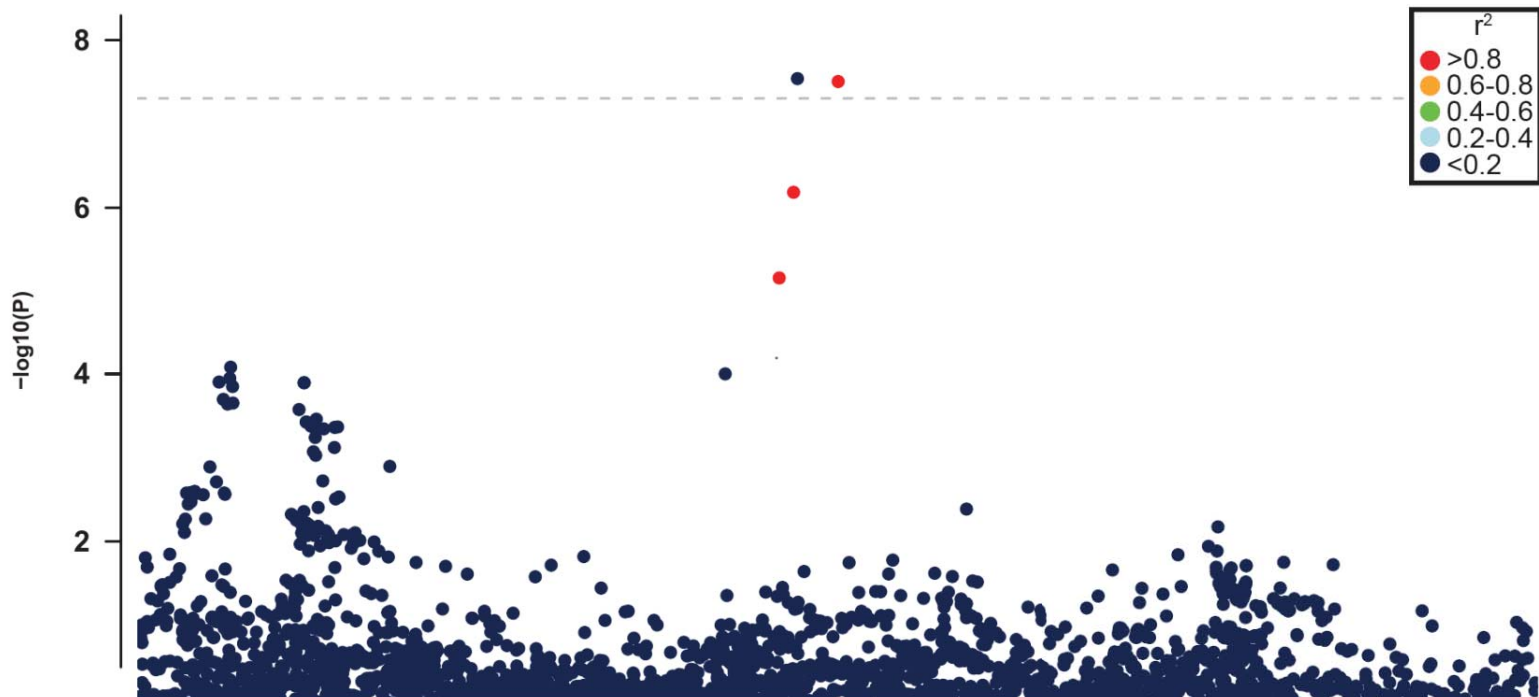

GZ>CP

CP>GZ

Corrected for total SA

Uncorrected

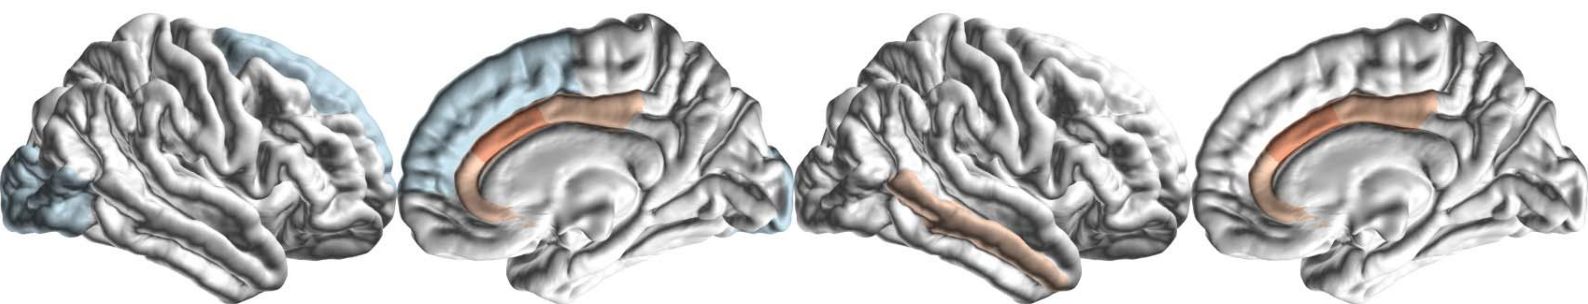

Zscore of the effect allele: A



# Superior Frontal SA: rs4915928

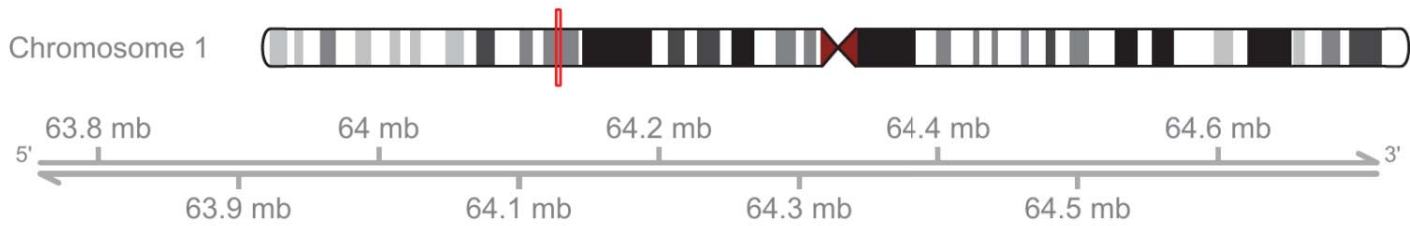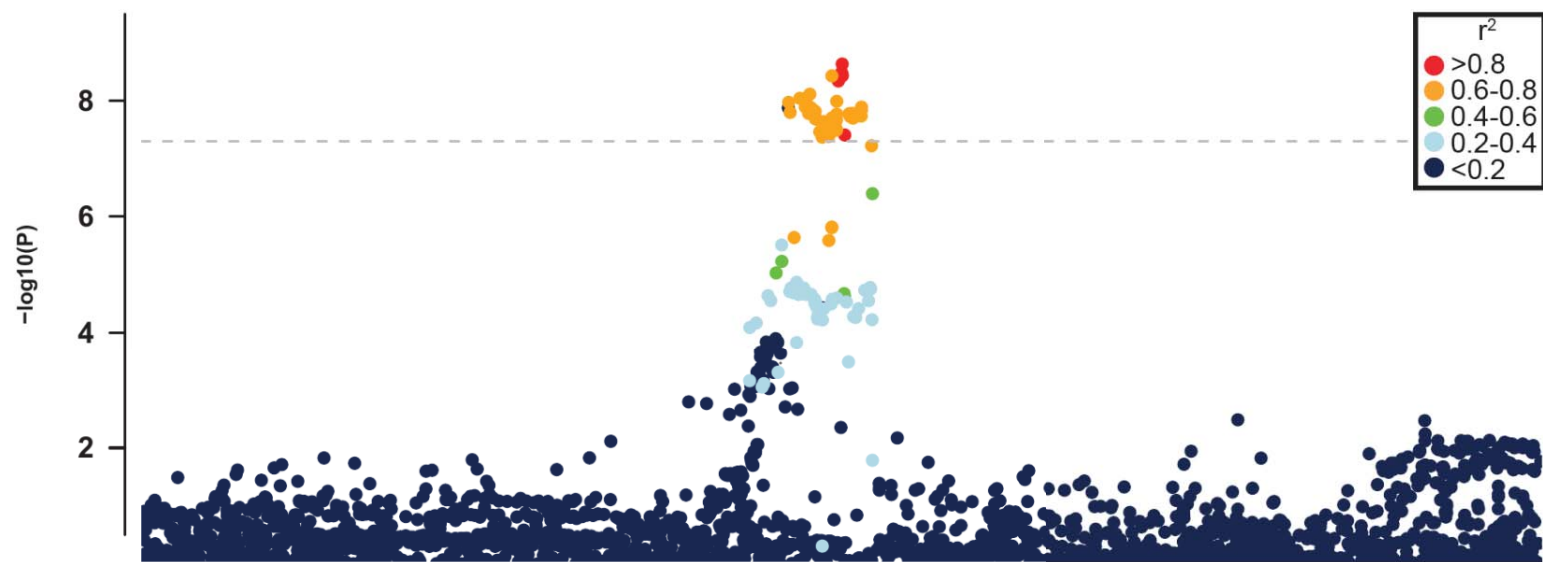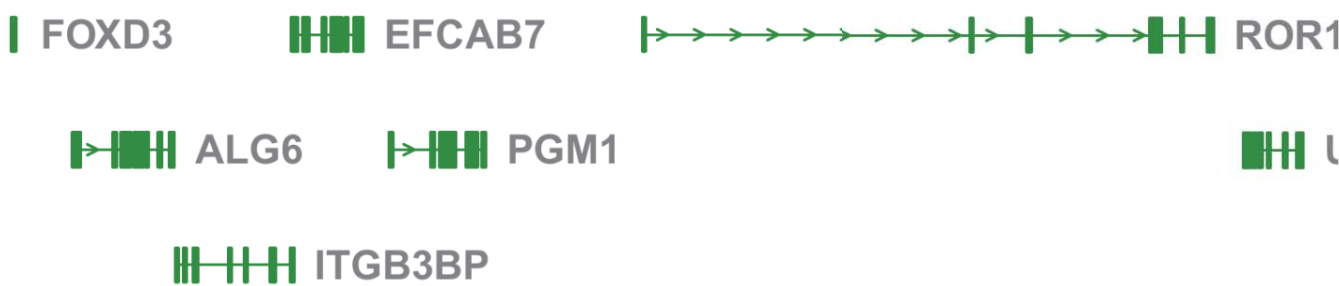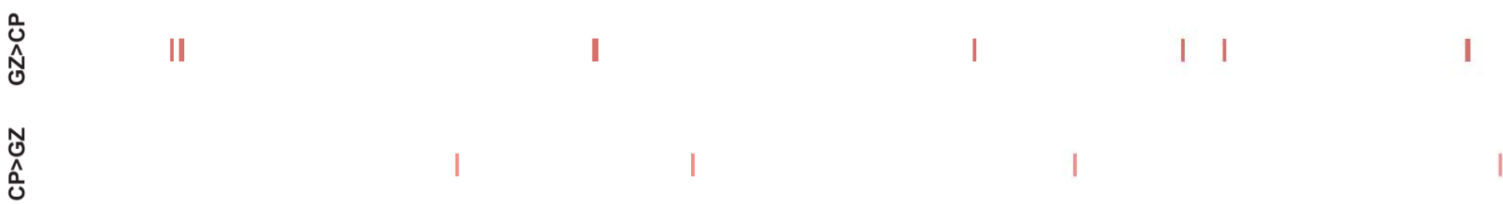

Corrected for total SA

Uncorrected

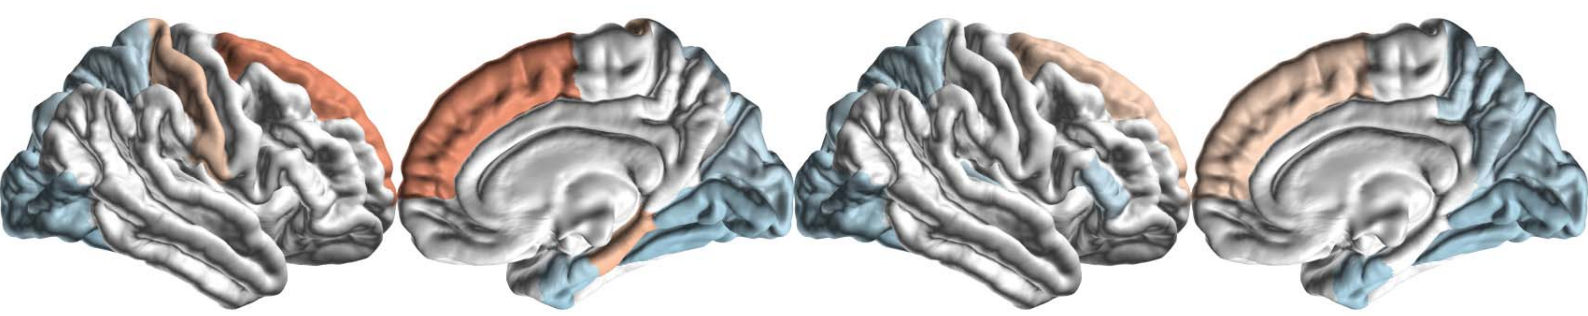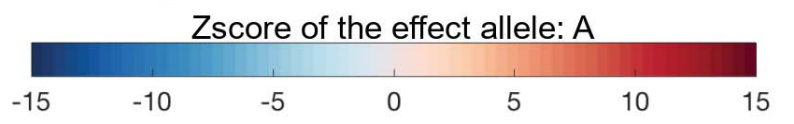



# Superior Frontal SA: rs4492207

Chromosome 6

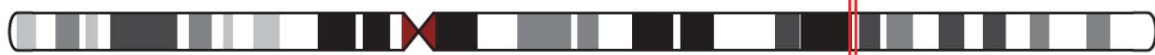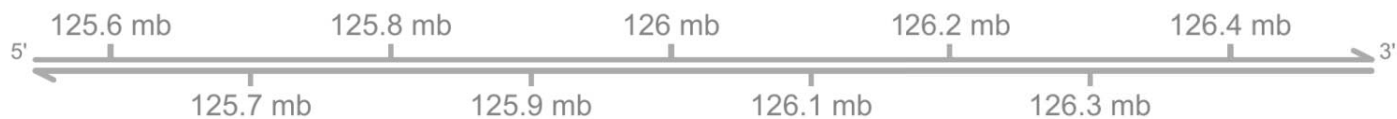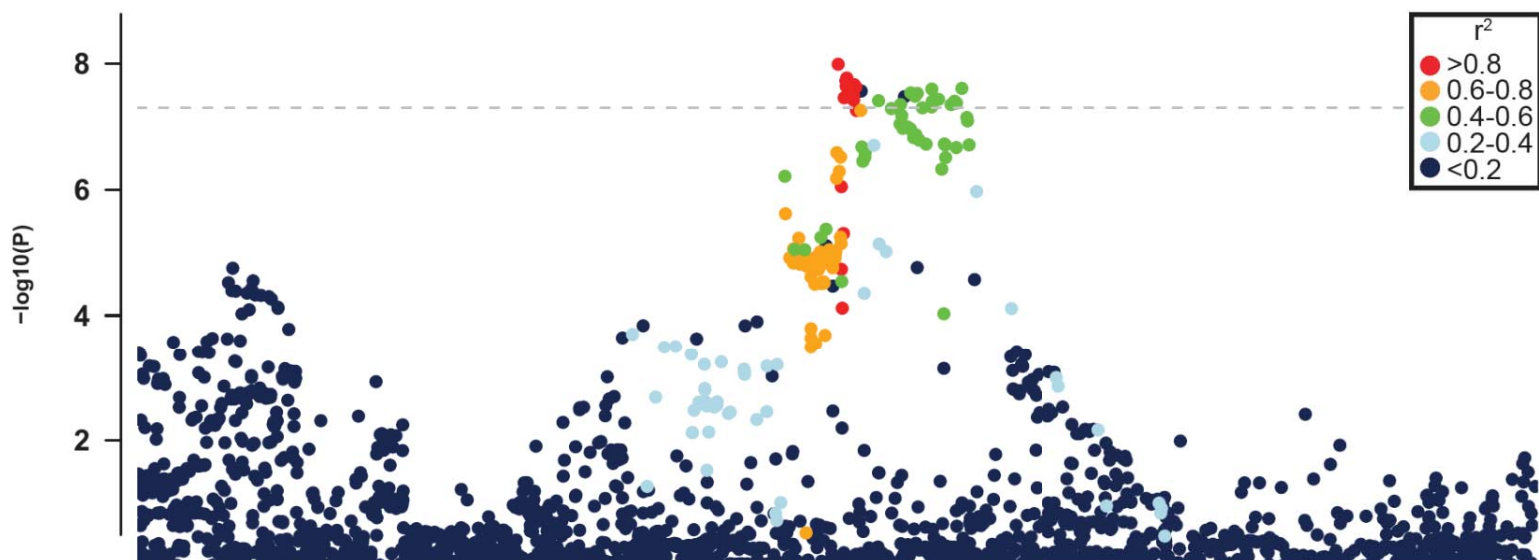

TPD52L1

HEY2

HINT3

HDDC2

NCOA7

TRMT11

GZ>CP

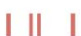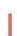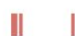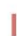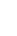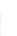

CP>GZ

Corrected for total SA

Uncorrected

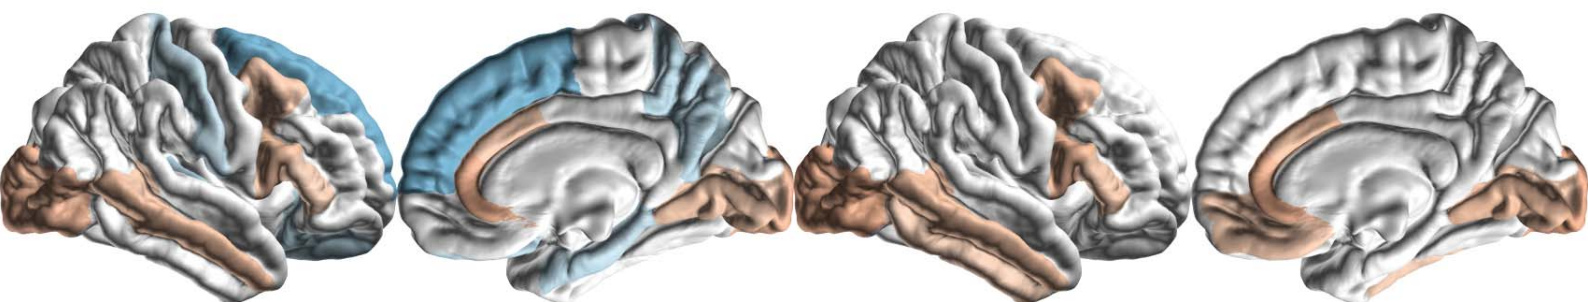

Zscore of the effect allele: A

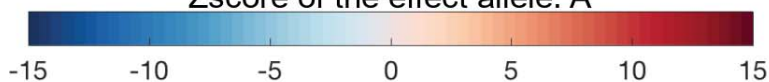



# Superior Frontal SA: rs76696867

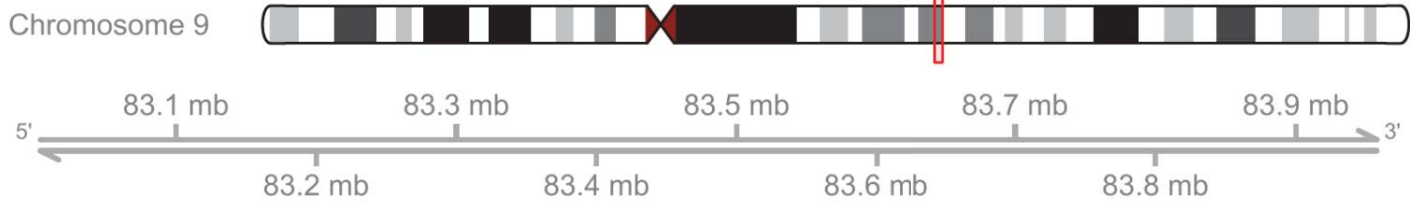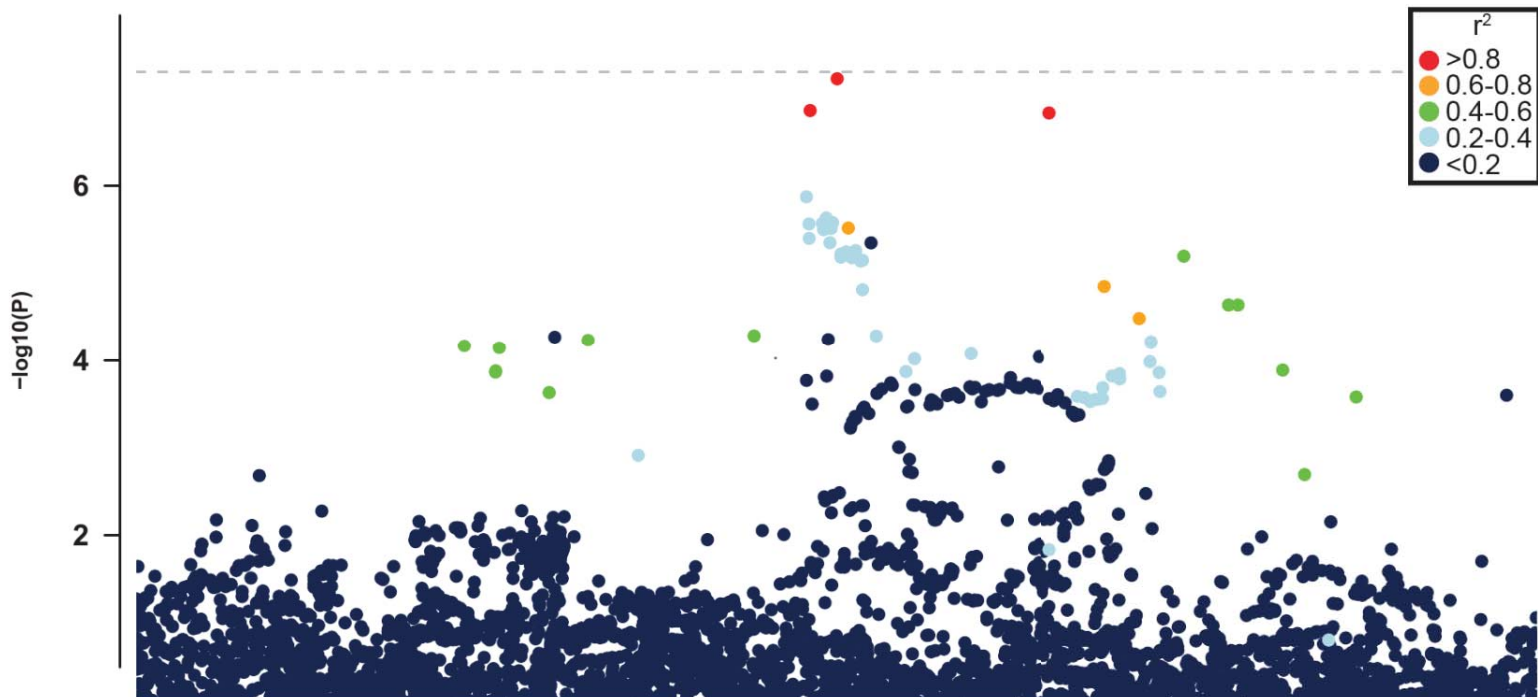

GZ>CP

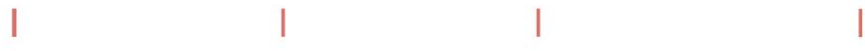

CP>GZ

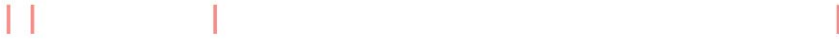

Corrected for total SA

Uncorrected

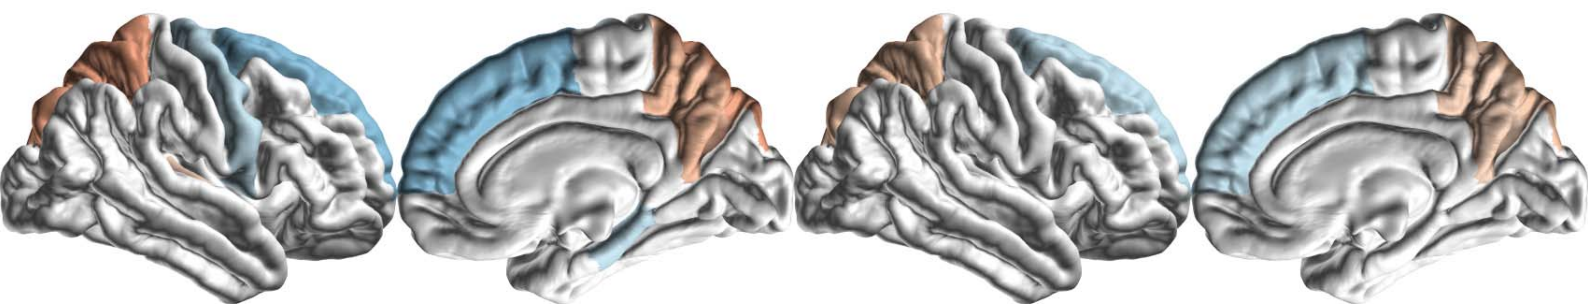

Zscore of the effect allele: A

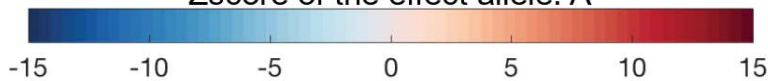

# Superior Frontal SA: rs4842266

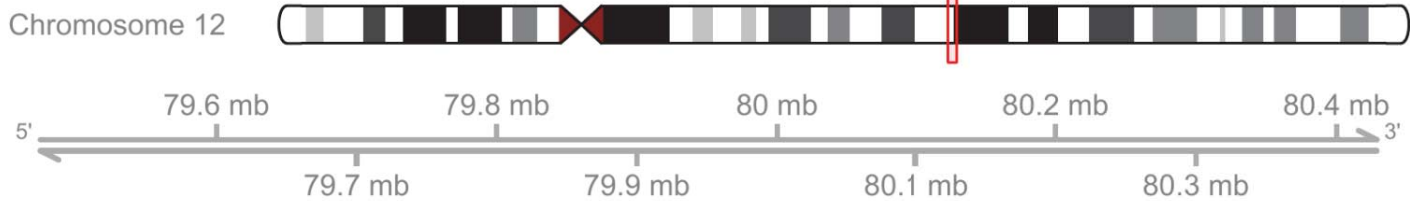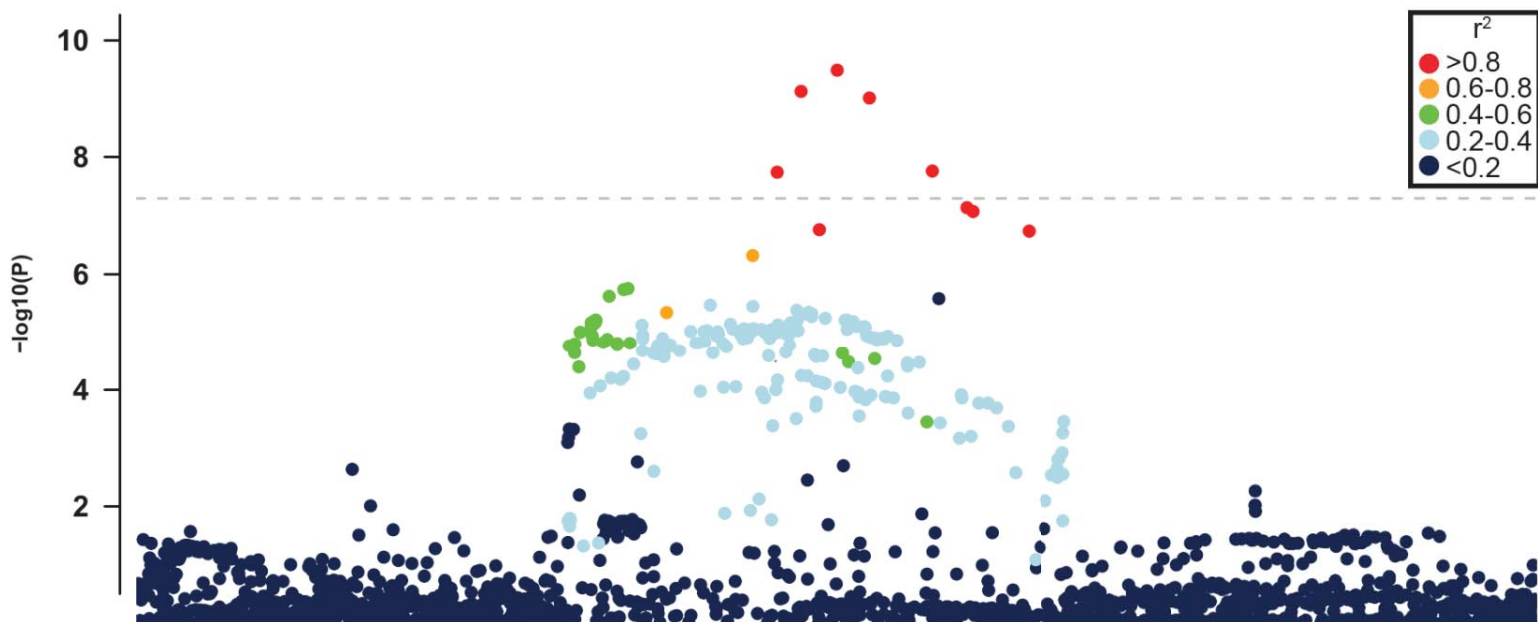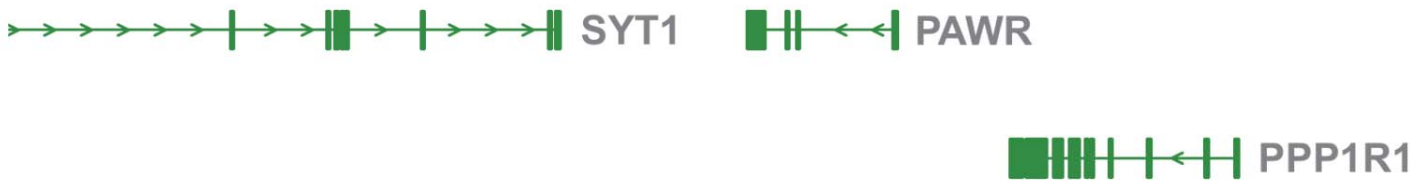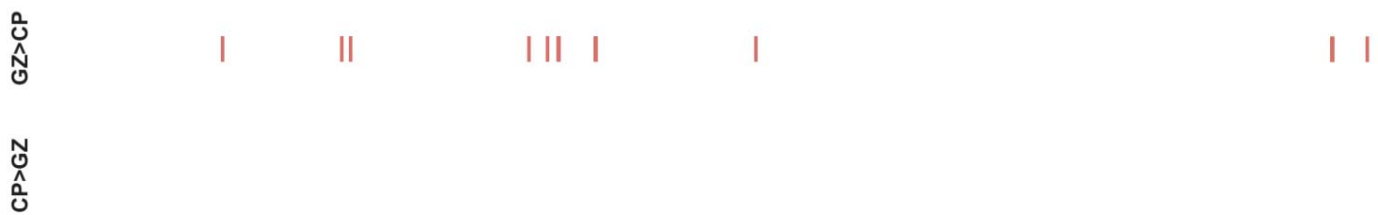

Corrected for total SA

Uncorrected

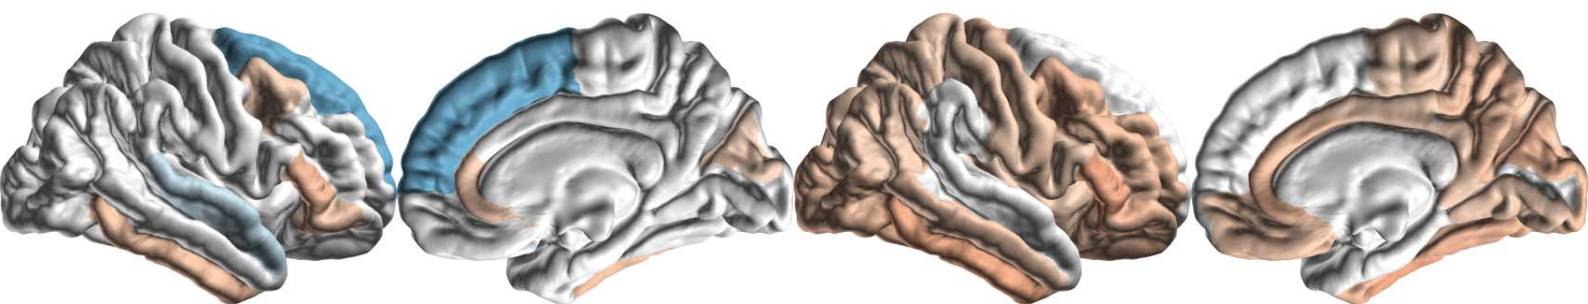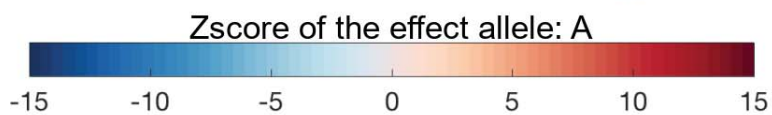

# Superior Frontal TH: rs9929219

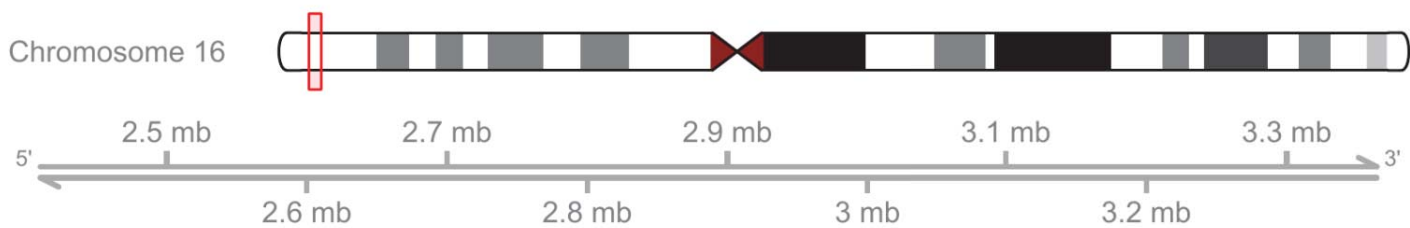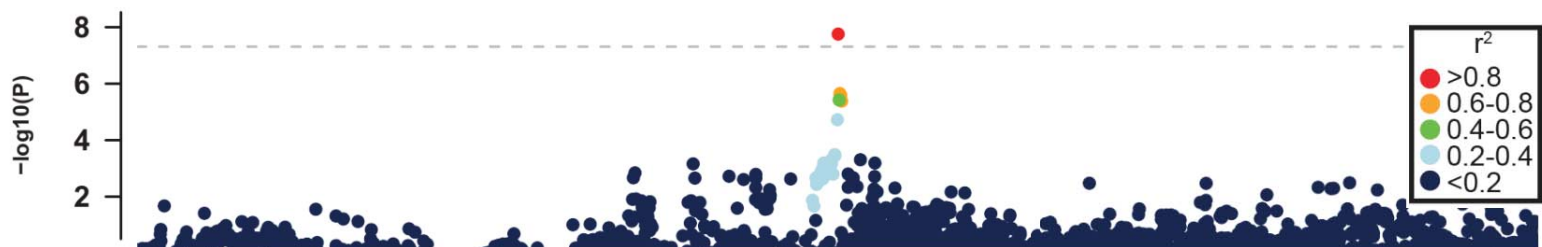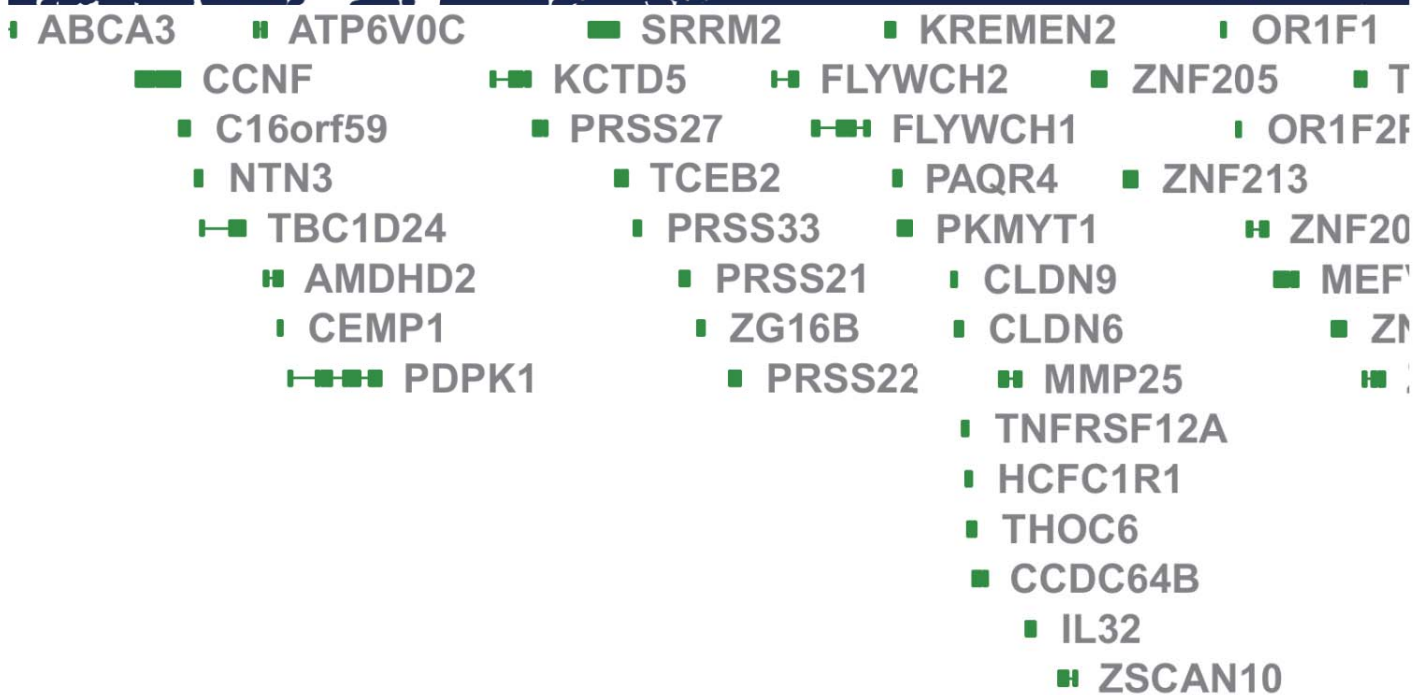

AngiampolifFGulate

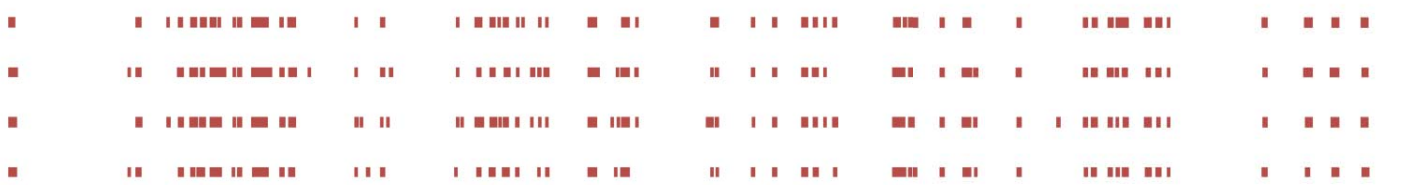

Corrected for average TH

Uncorrected

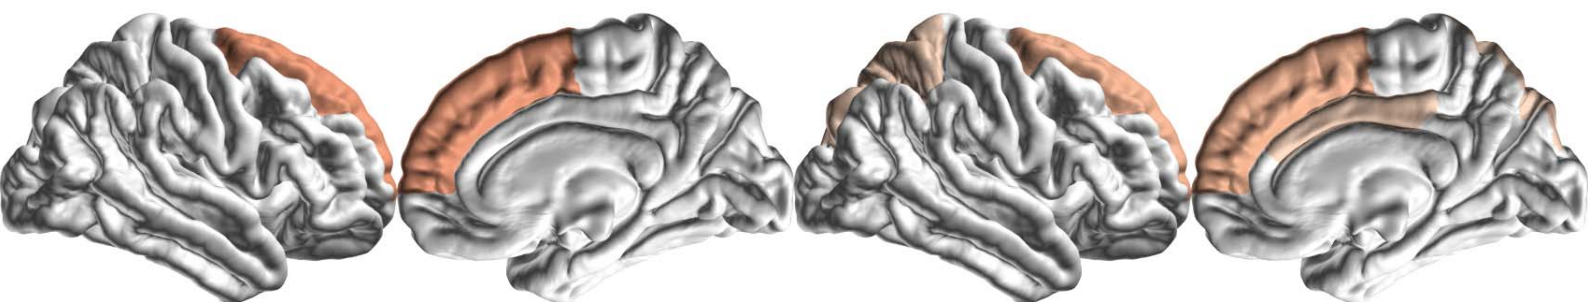

Zscore of the effect allele: A





### Rostral Middle Frontal SA: rs6682671

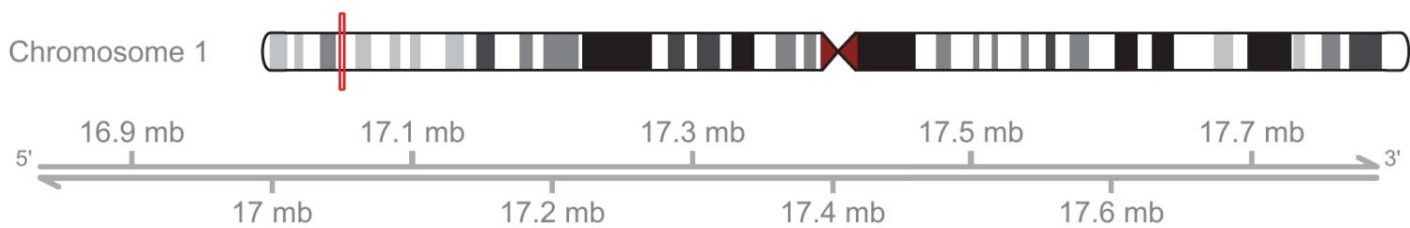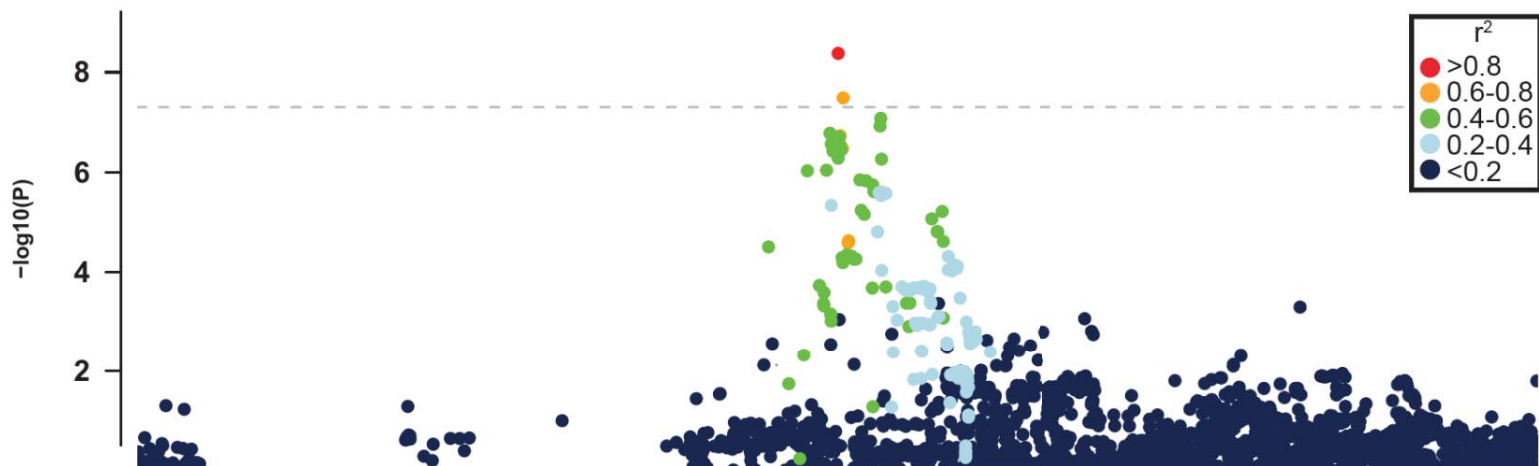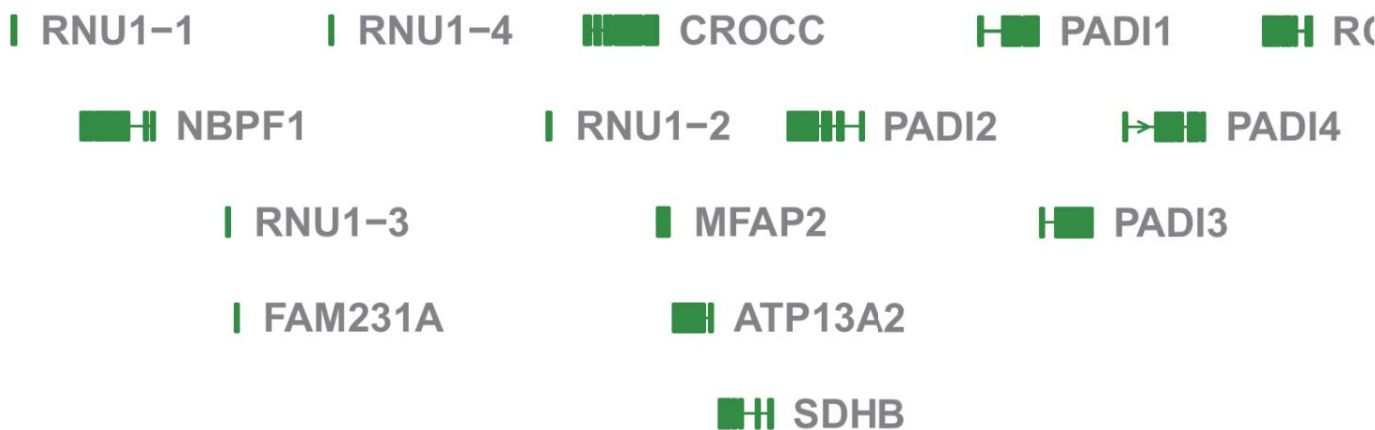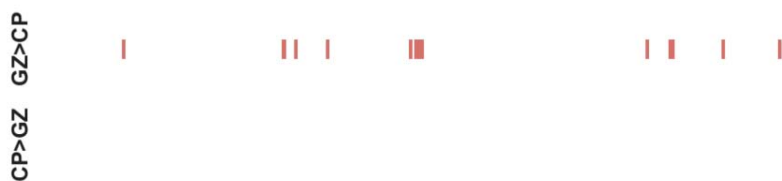

Corrected for total SA

Uncorrected

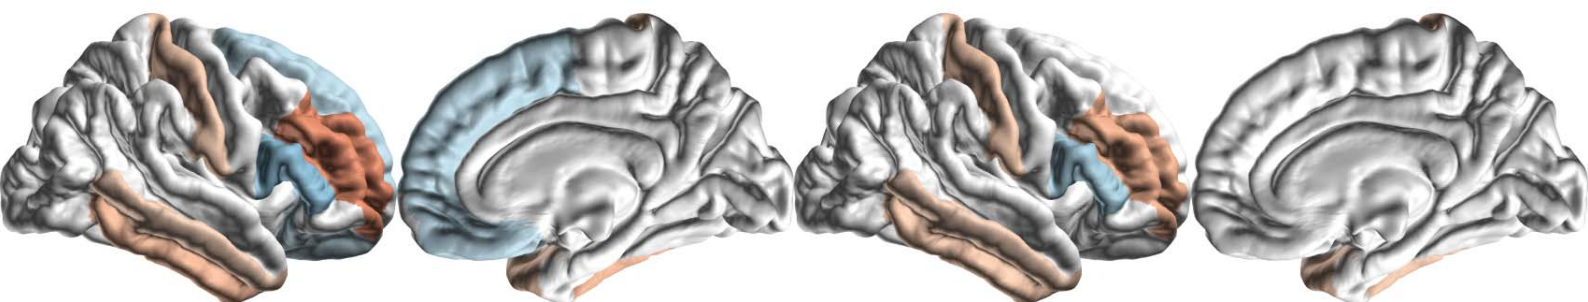

Zscore of the effect allele: T

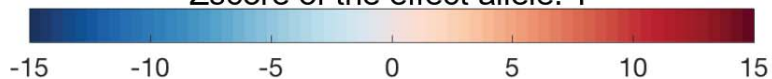



# Rostral Middle Frontal SA: rs35612915

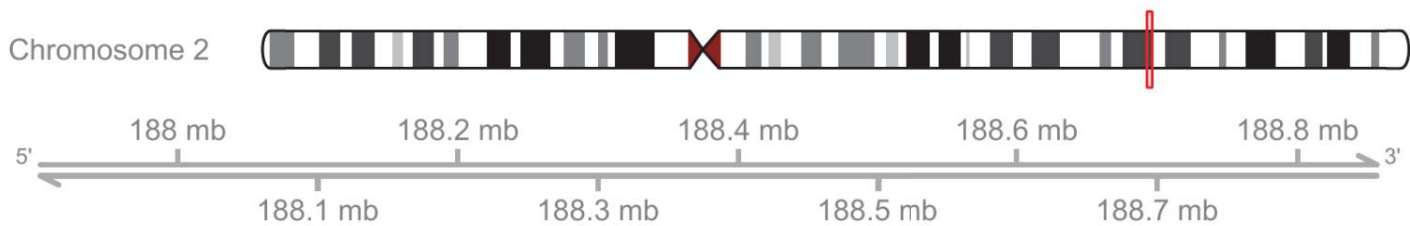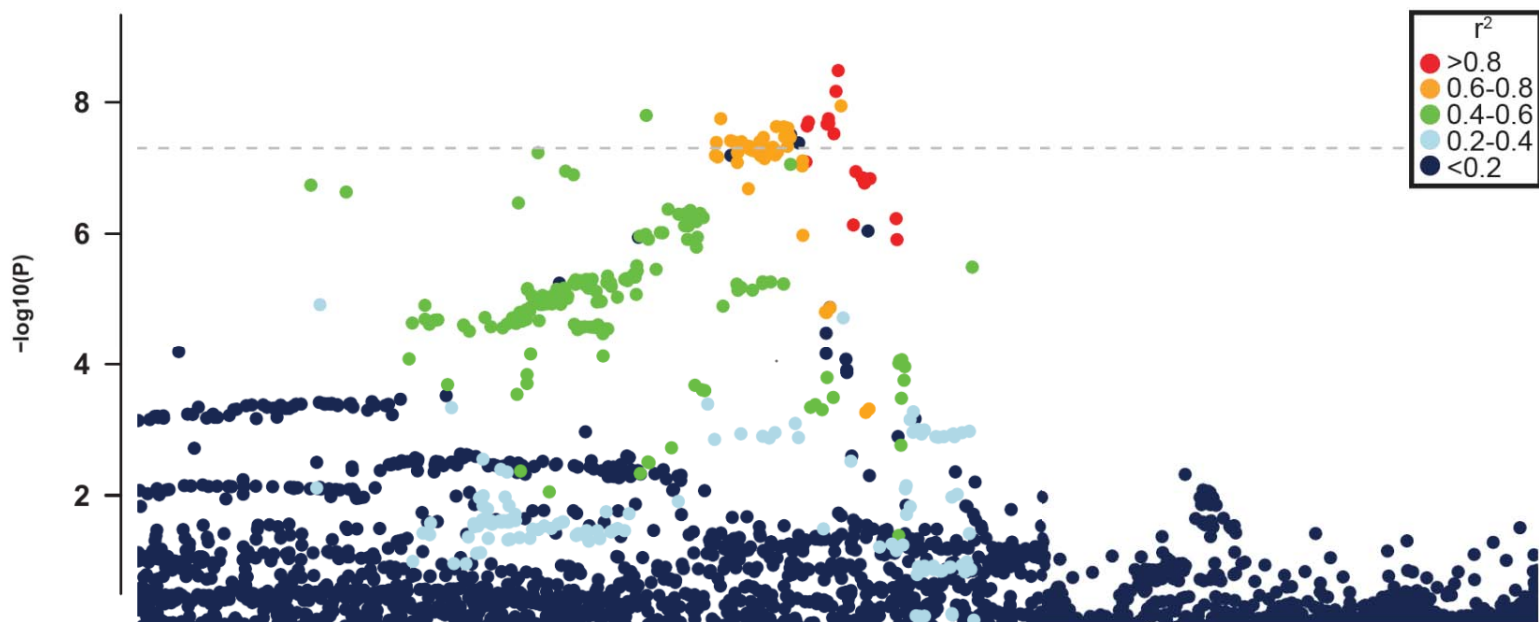

CALCRL

TFPI

GZ>CP

CP>GZ

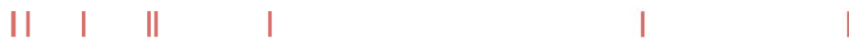

Corrected for total SA

Uncorrected

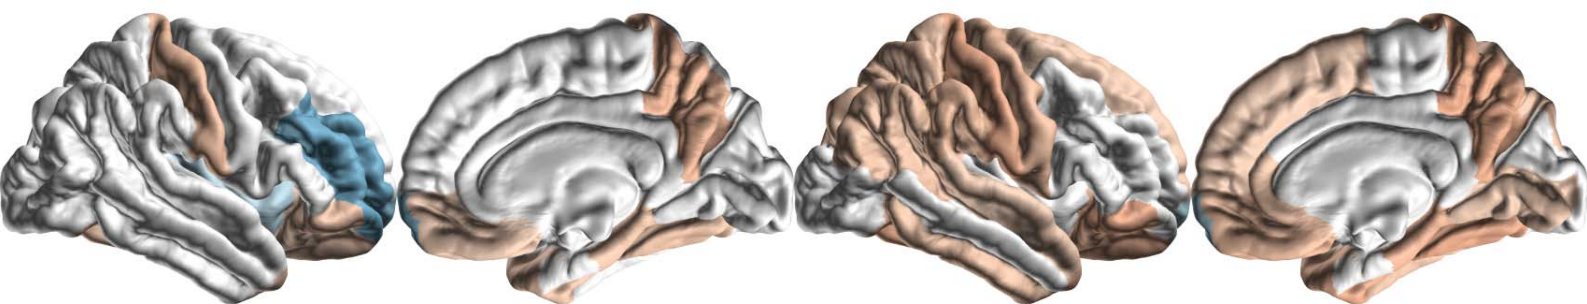

Zscore of the effect allele: A



# Rostral Middle Frontal SA: rs1165645

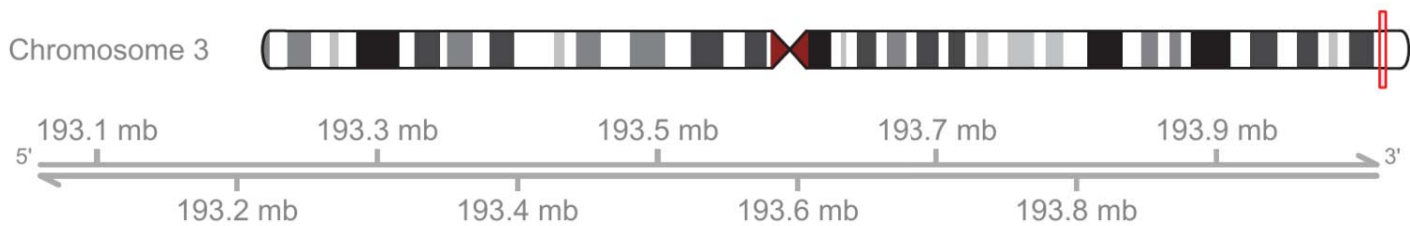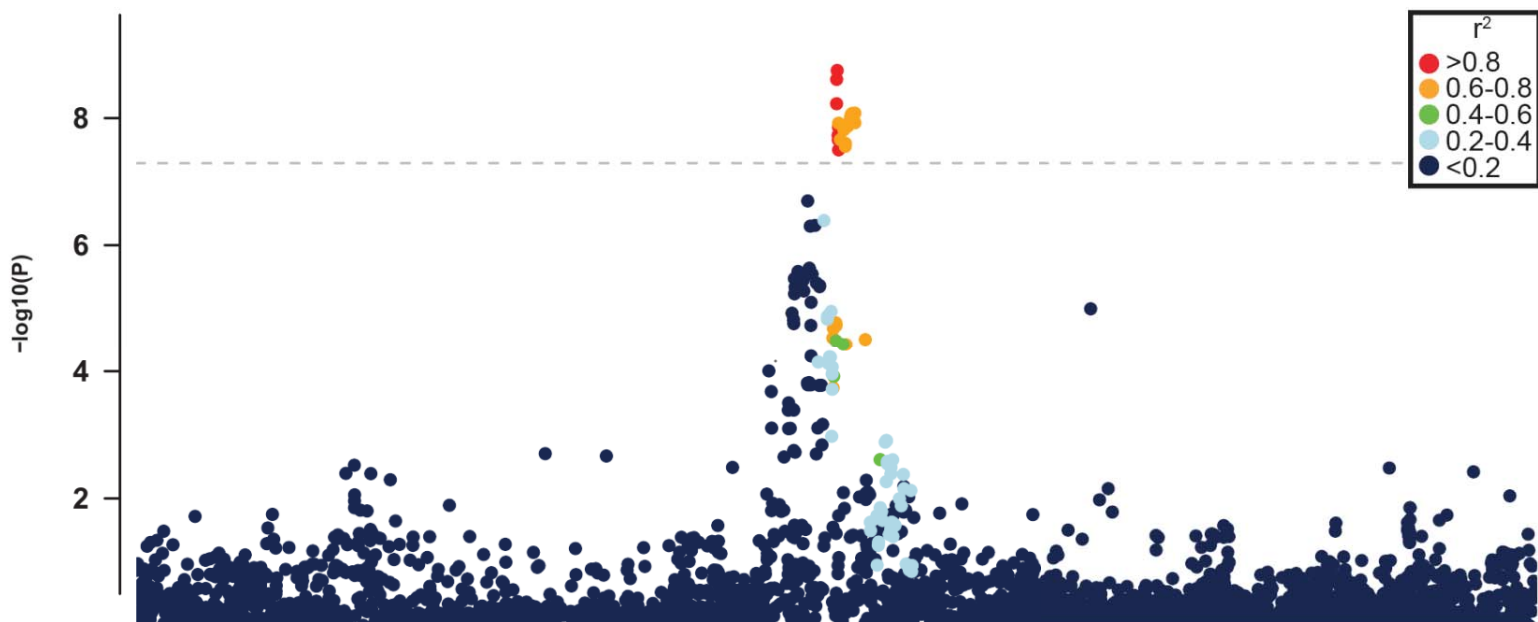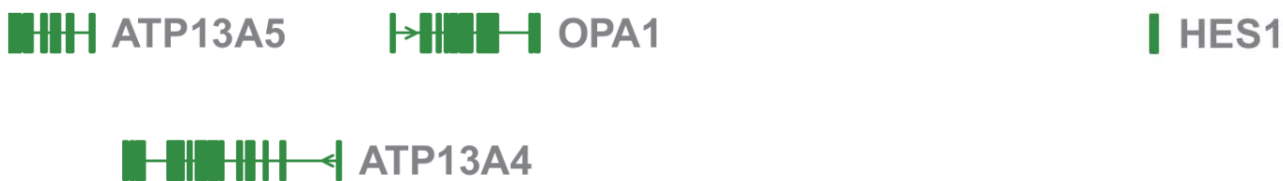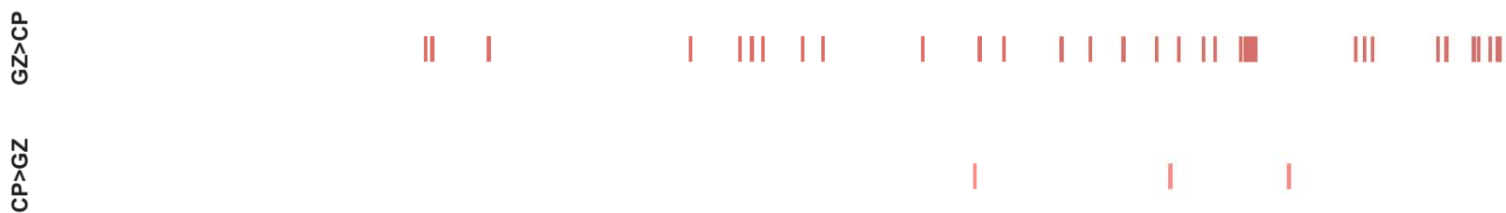

Corrected for total SA

Uncorrected

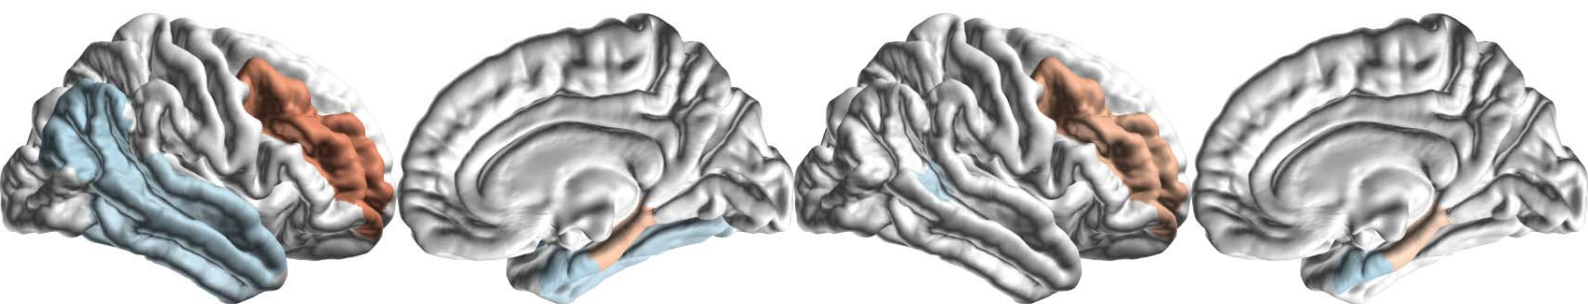

Zscore of the effect allele: A

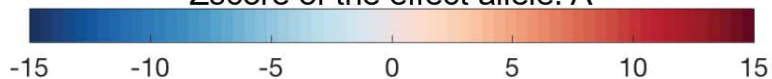

# Rostral Middle Frontal SA: rs7731360

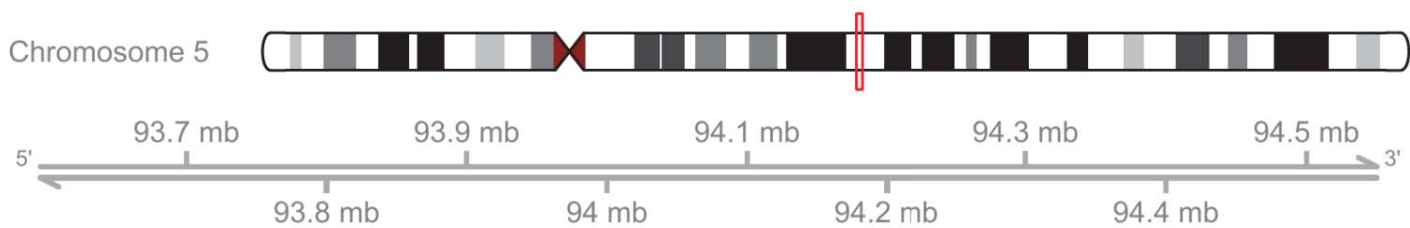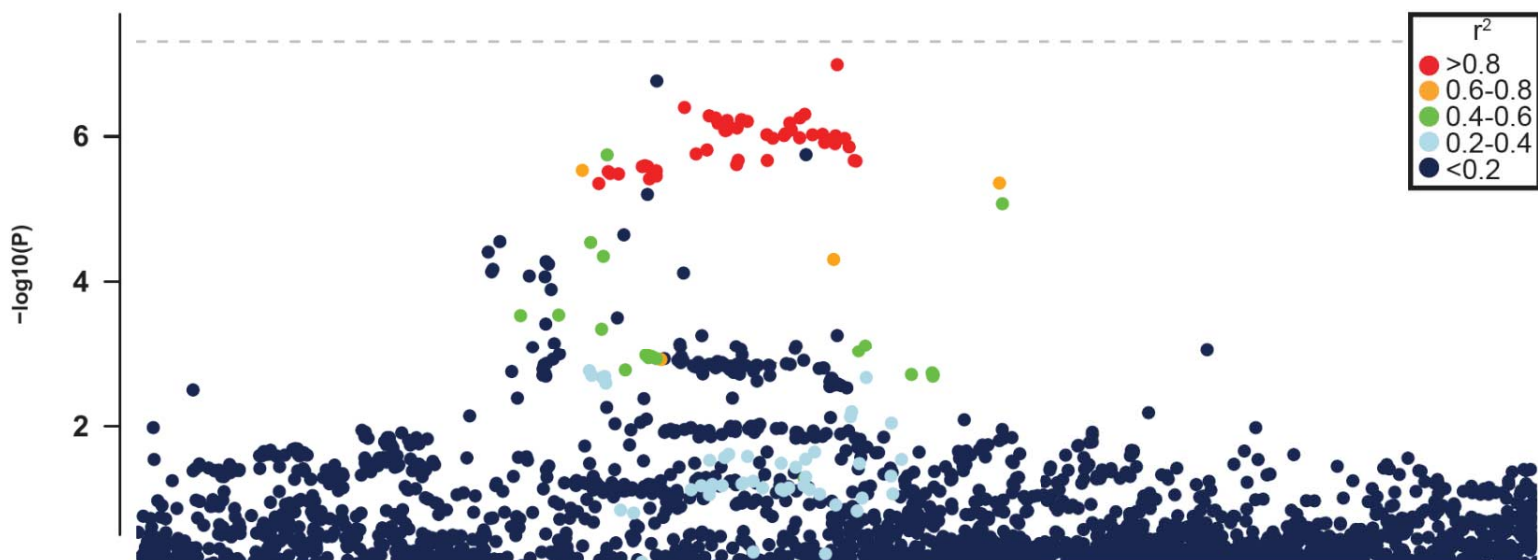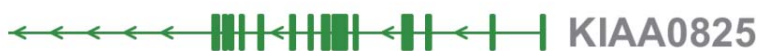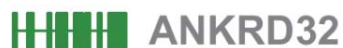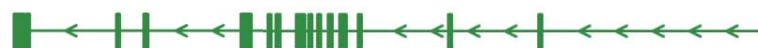

GZ>CP  
CP>GZ

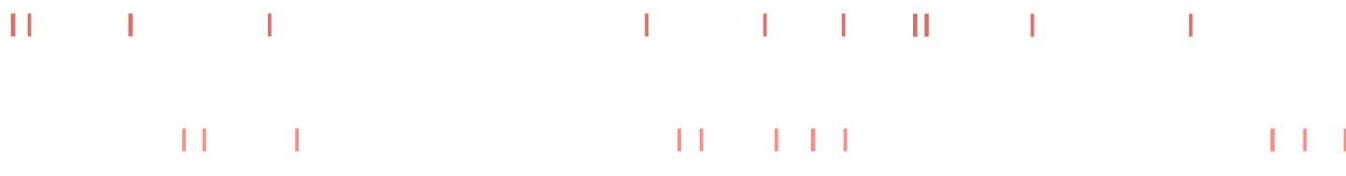

Corrected for total SA

Uncorrected

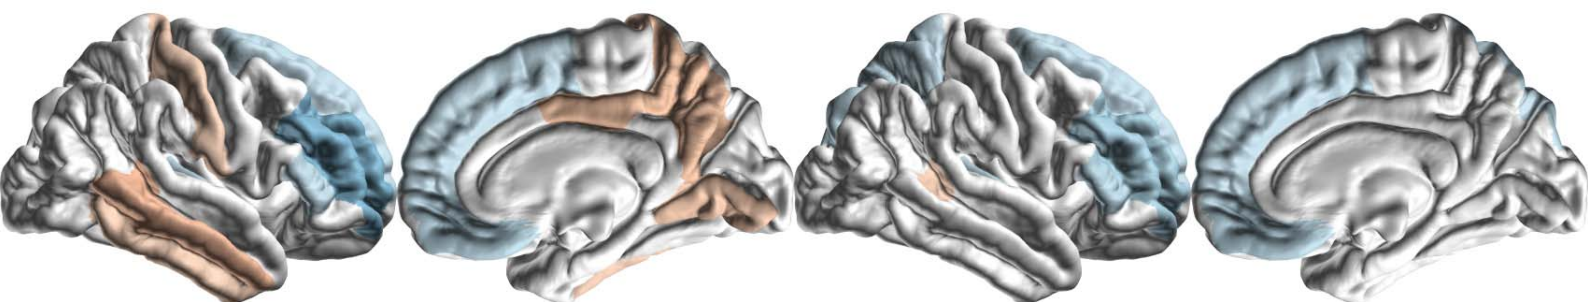

Zscore of the effect allele: A





# Rostral Middle Frontal SA: rs10283100

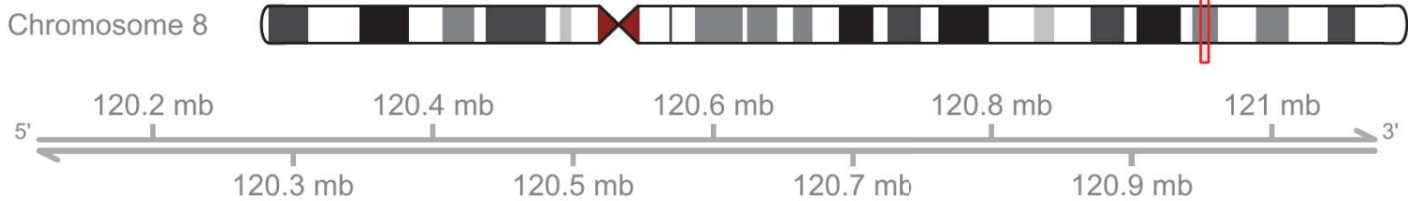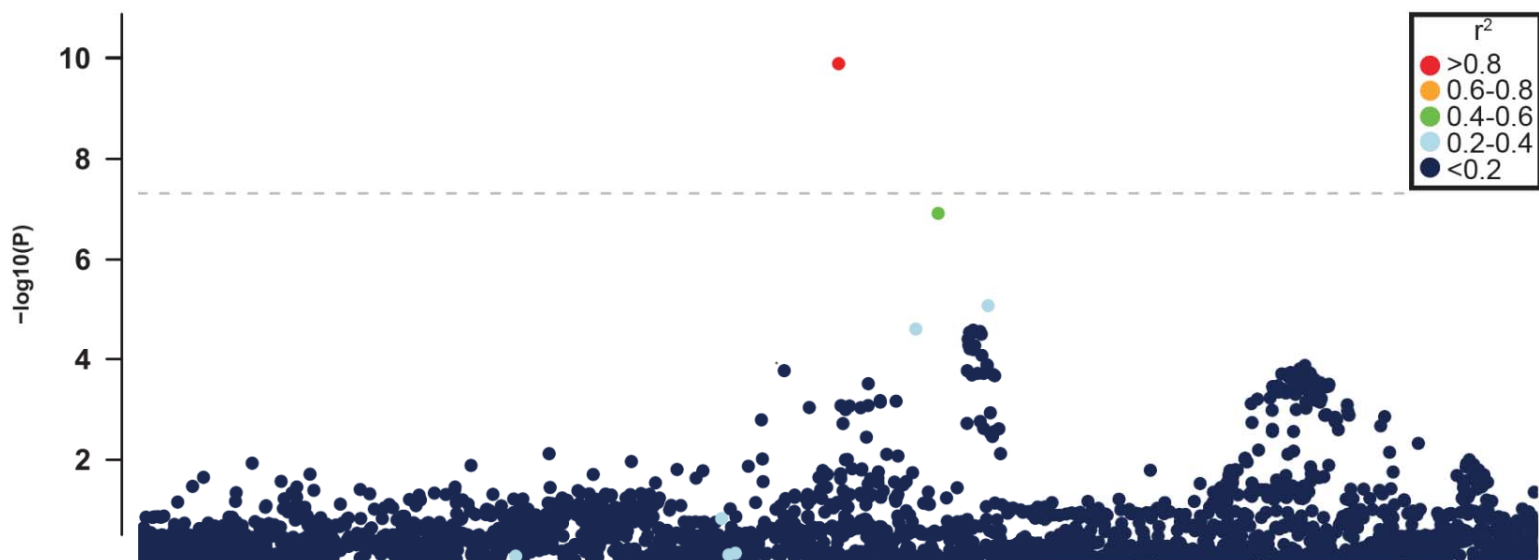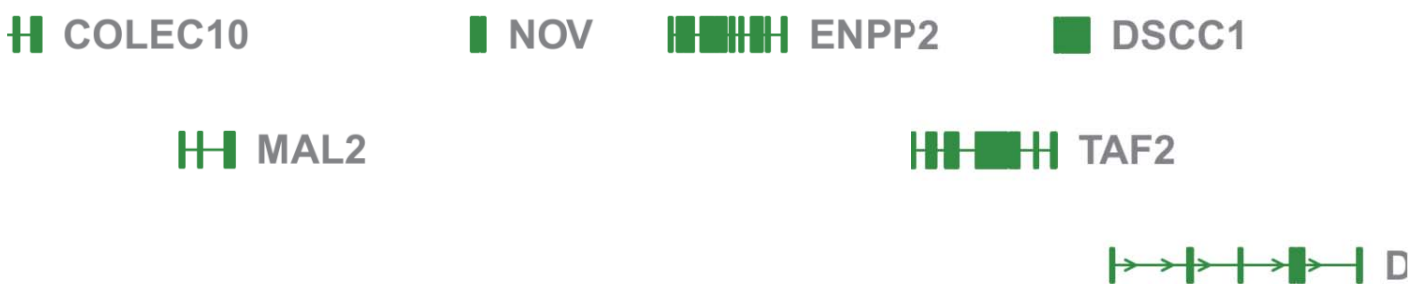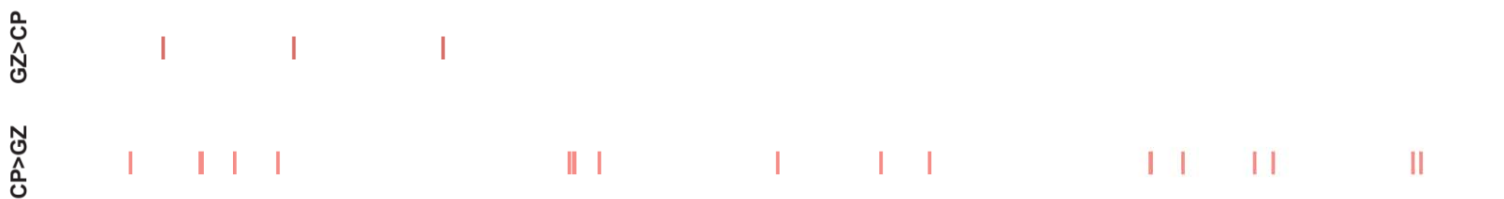

Corrected for total SA

Uncorrected

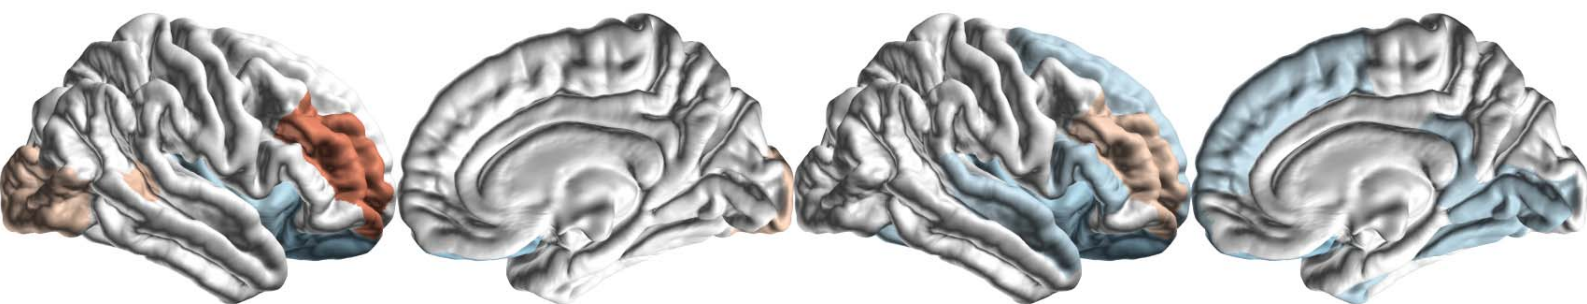



# Rostral Middle Frontal SA: rs2276133

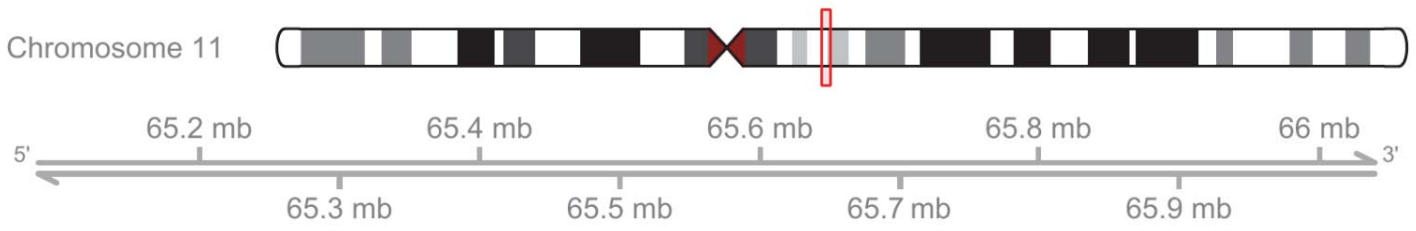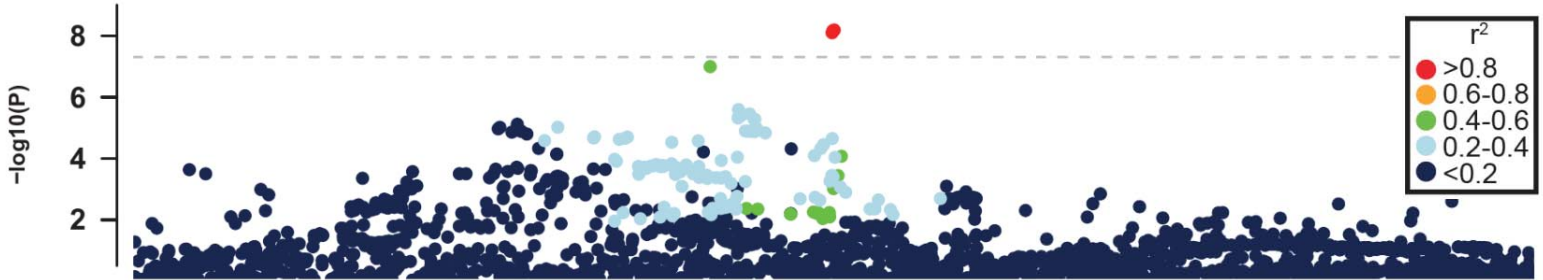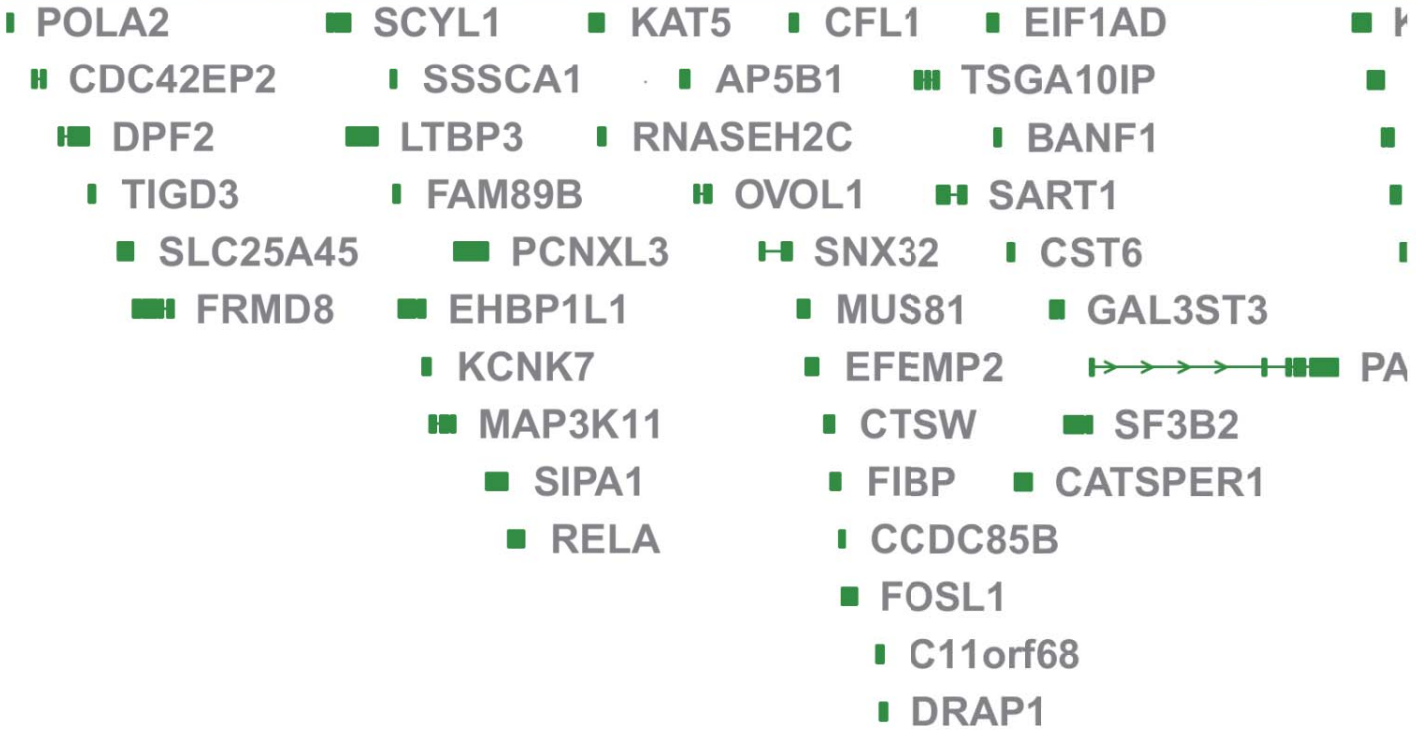

CP>GZZ>CP

Corrected for total SA

Uncorrected

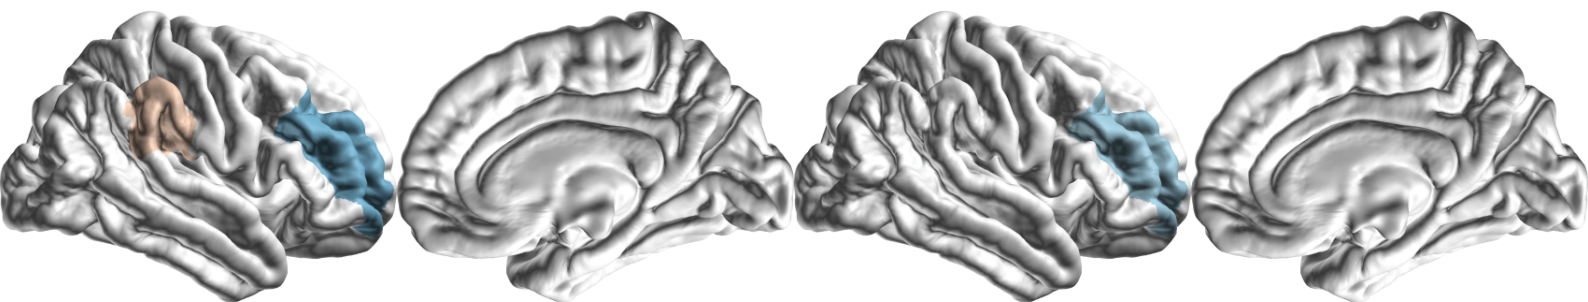

Zscore of the effect allele: A

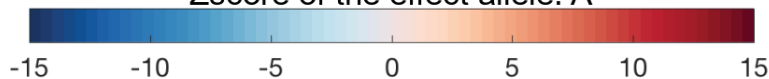

# Rostral Middle Frontal SA: rs4772268

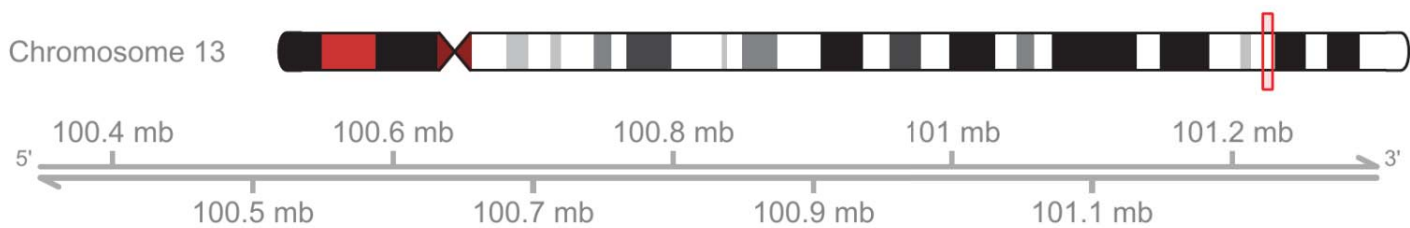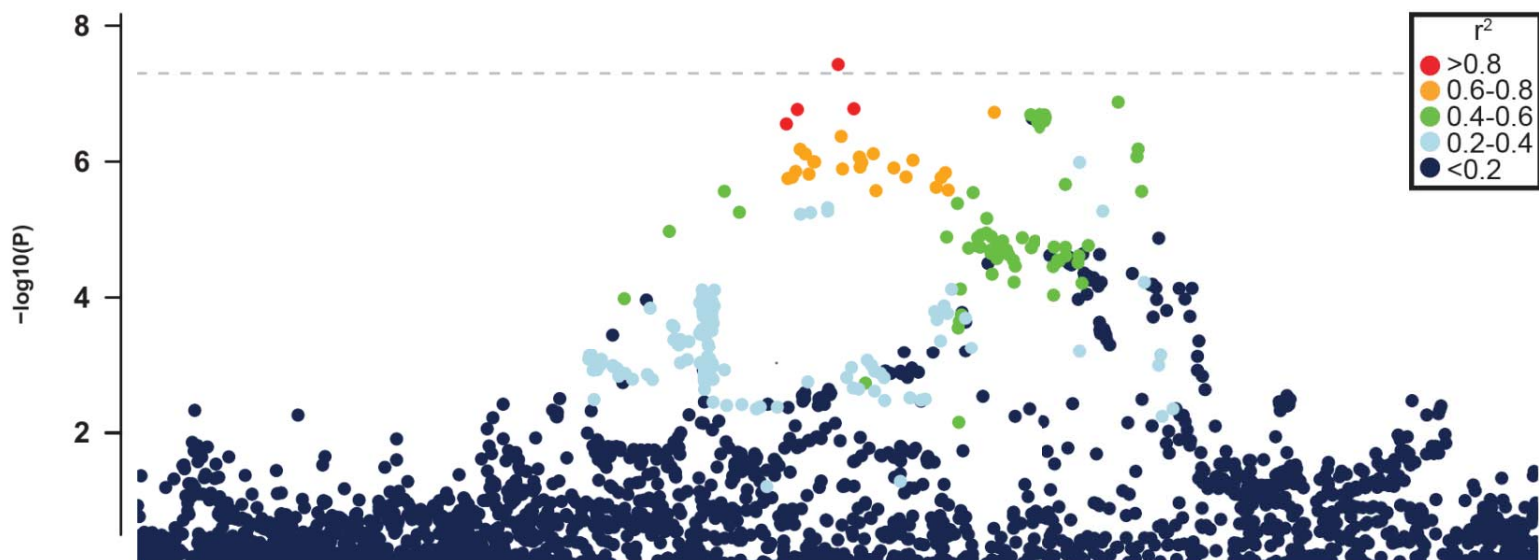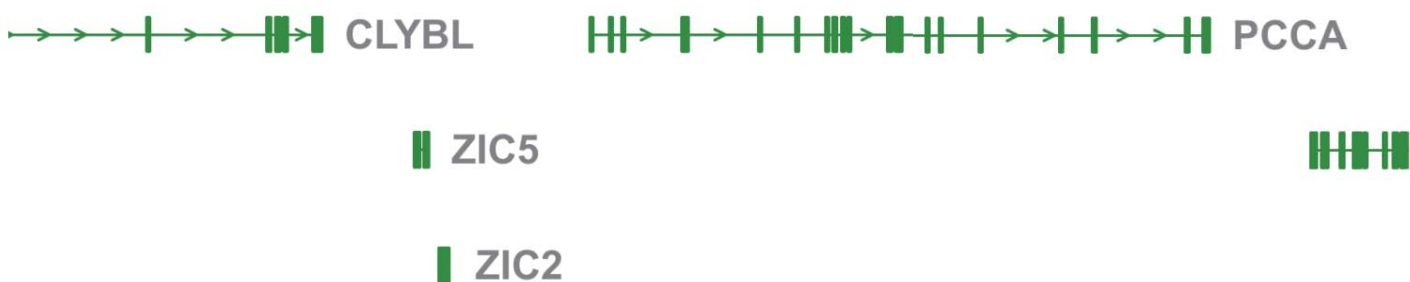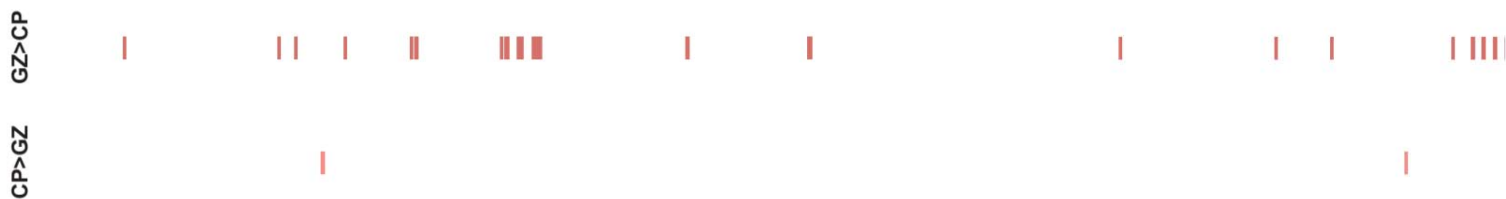

Corrected for total SA

Uncorrected

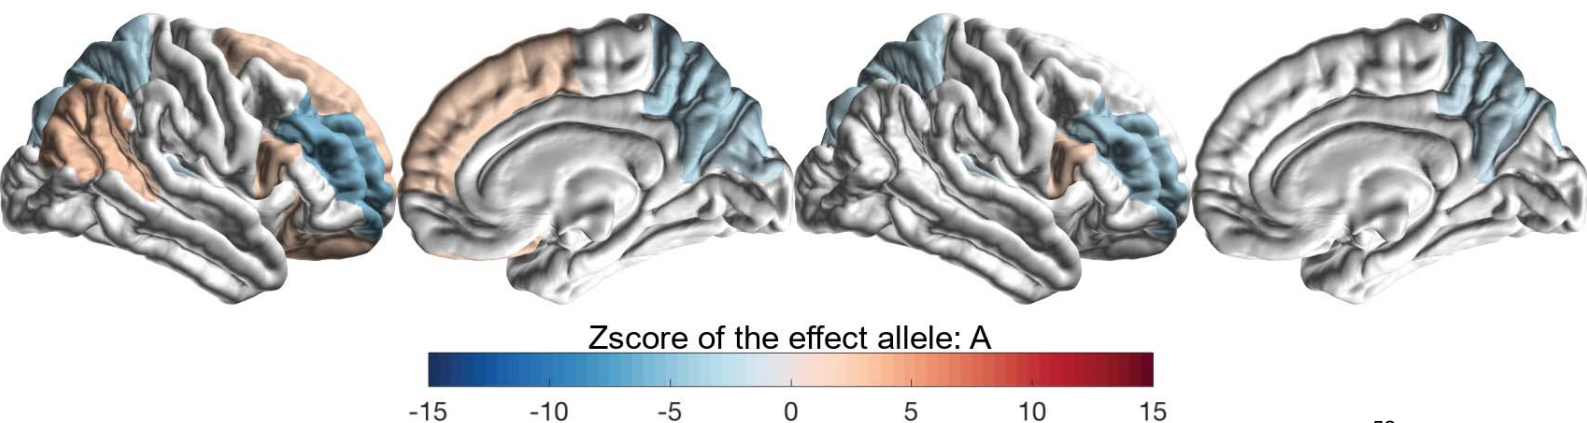

# Rostral Middle Frontal SA: rs1257415

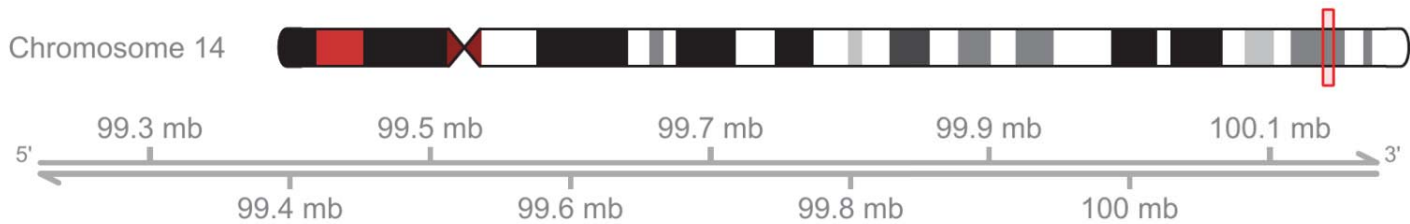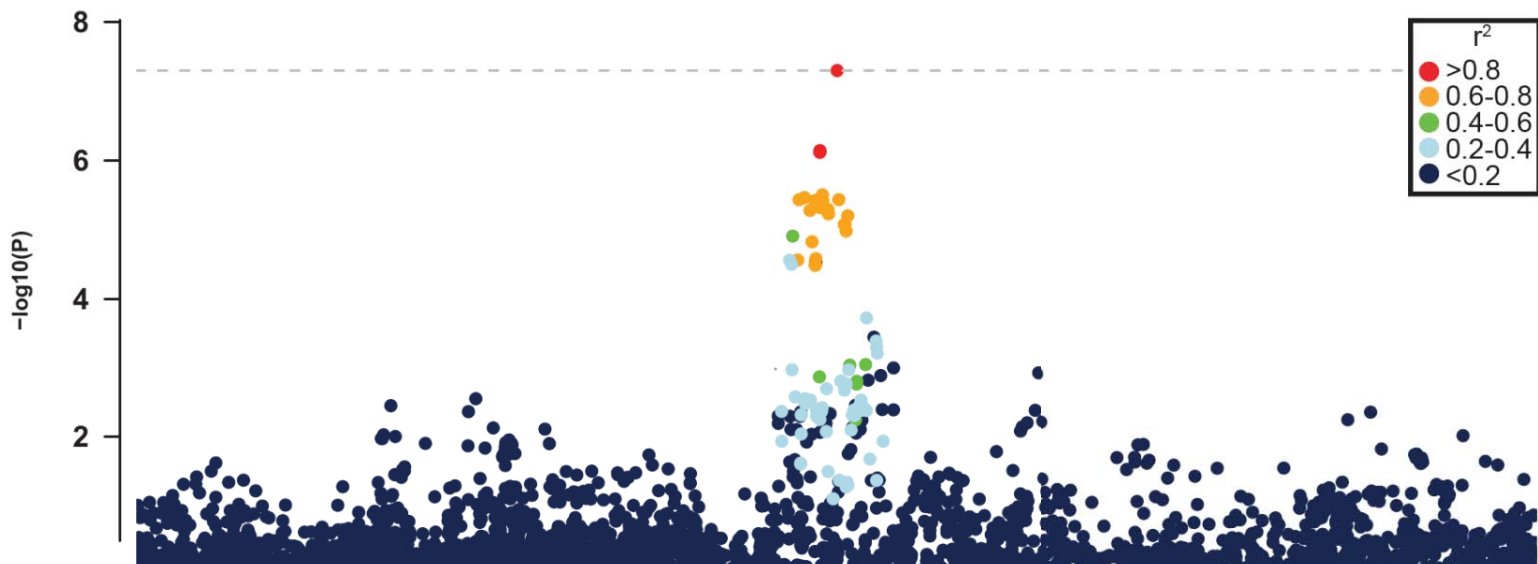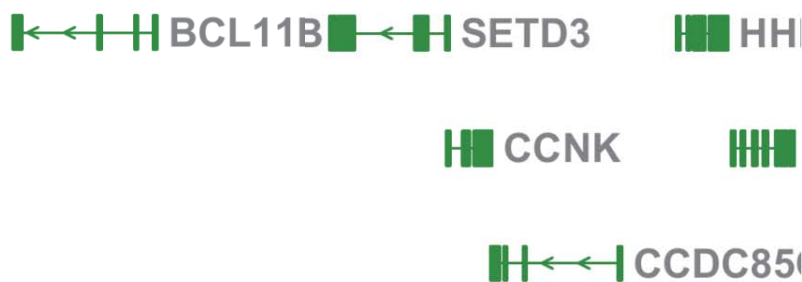

CP>GZ  
GZ>CP

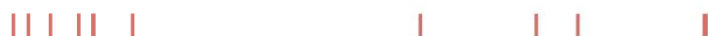

Corrected for total SA

Uncorrected

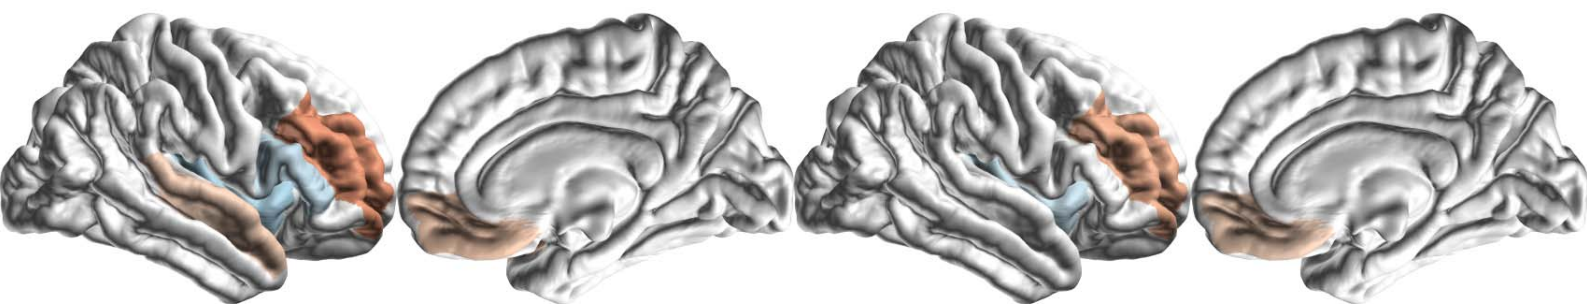

Zscore of the effect allele: A





# Rostral Middle Frontal SA: rs1080066

Chromosome 15

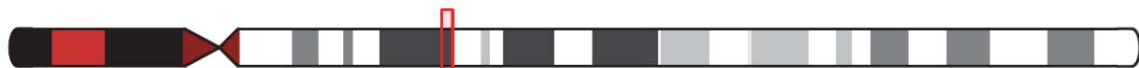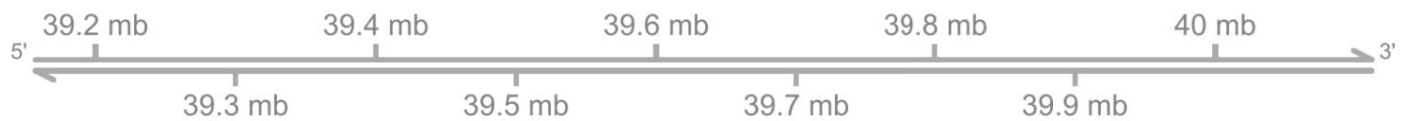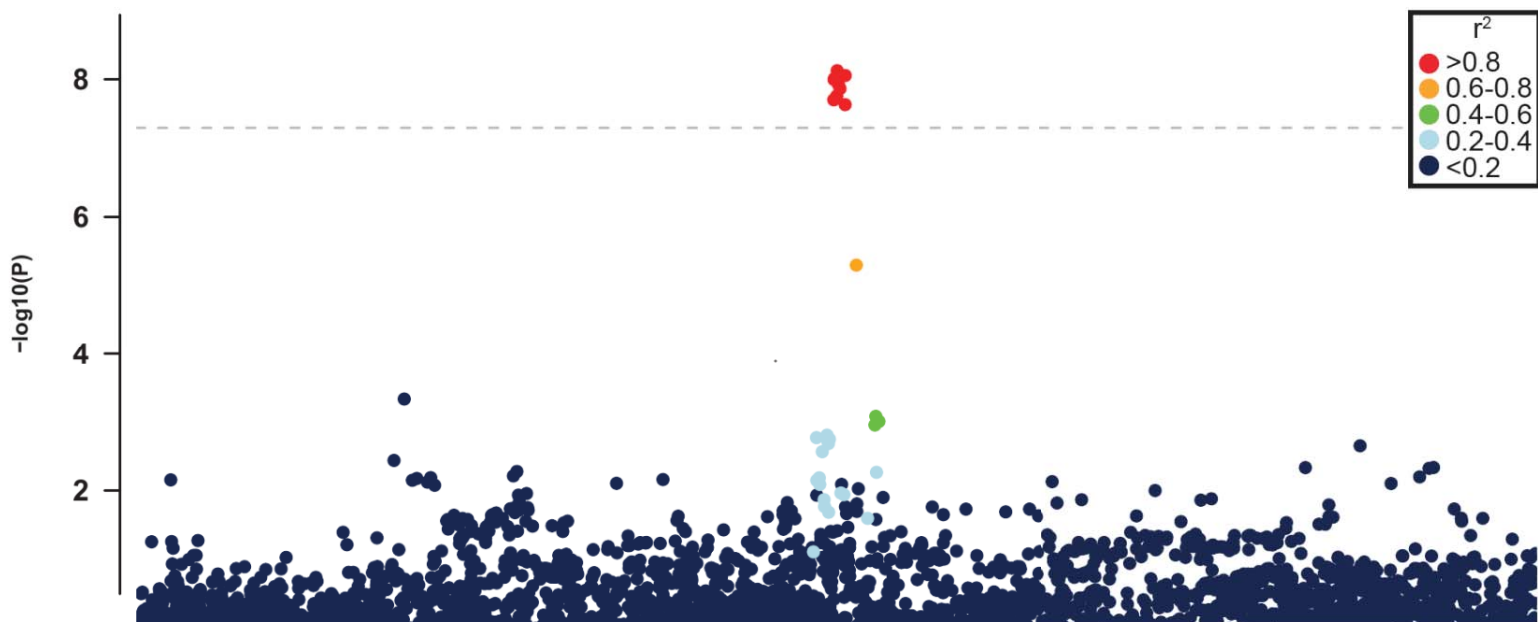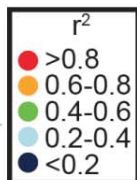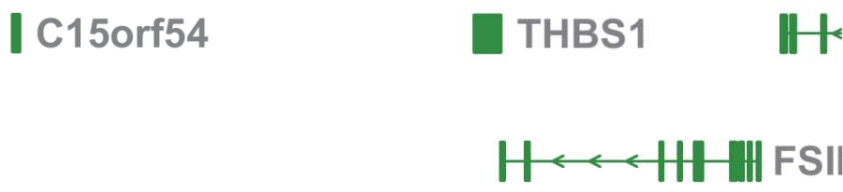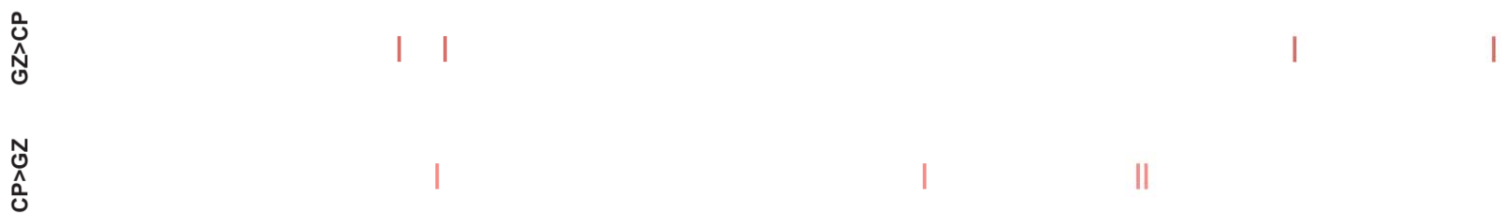

Corrected for total SA

Uncorrected

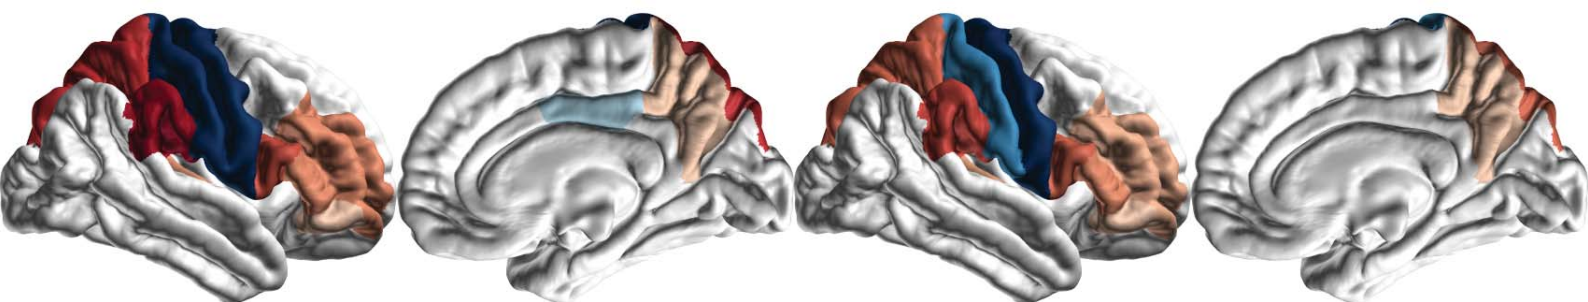

Zscore of the effect allele: A

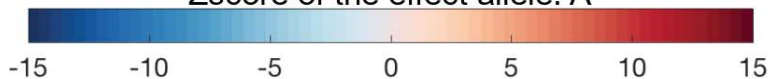

# Rostral Middle Frontal SA: rs40115

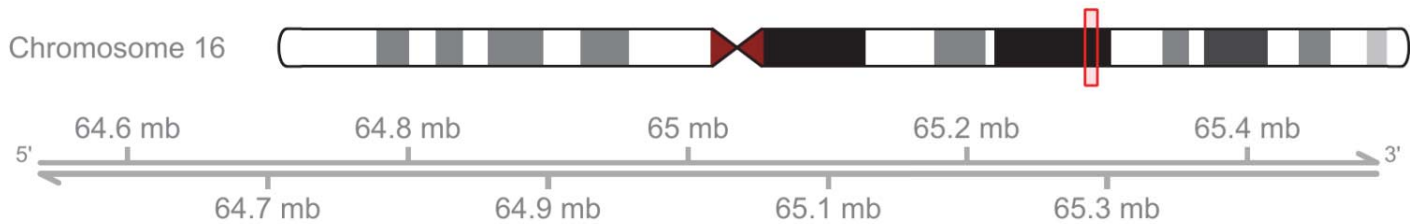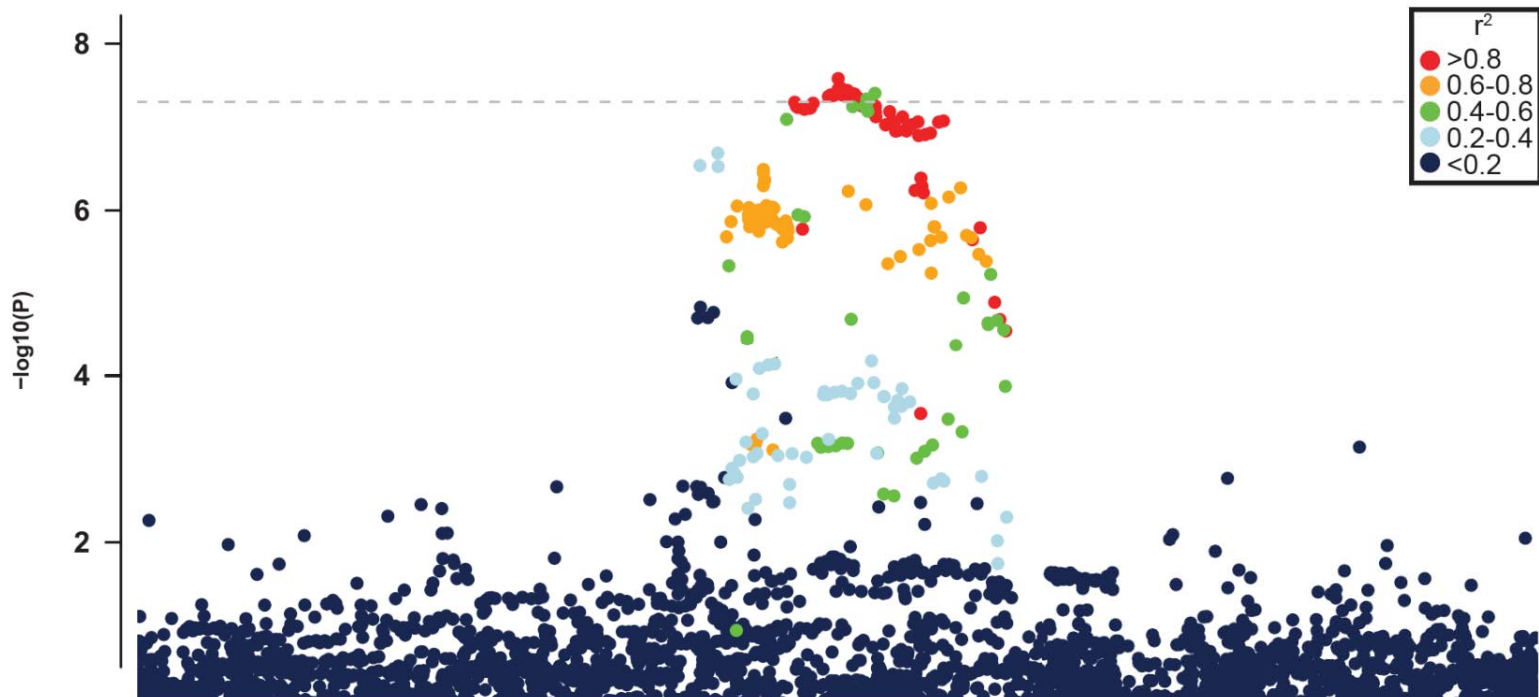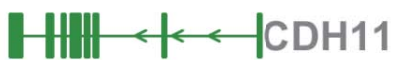

GZ>CP

CP>GZ

Corrected for total SA

Uncorrected

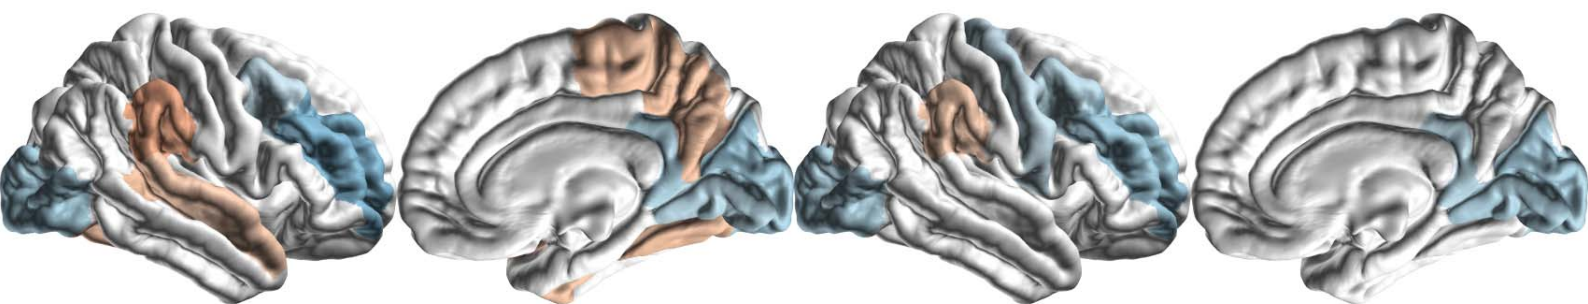

Zscore of the effect allele: T



# Rostral Middle Frontal TH: rs6671321

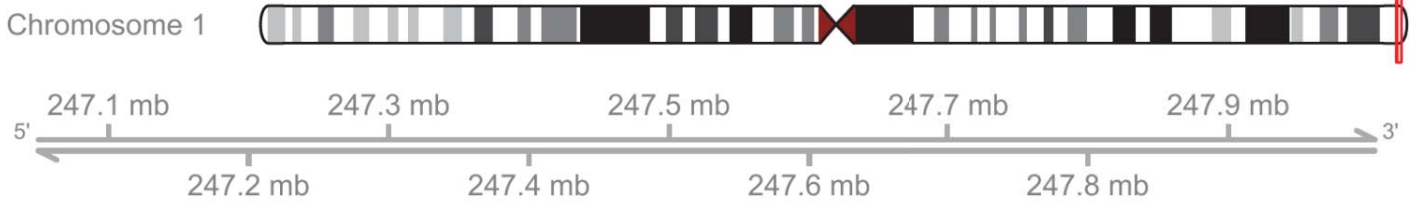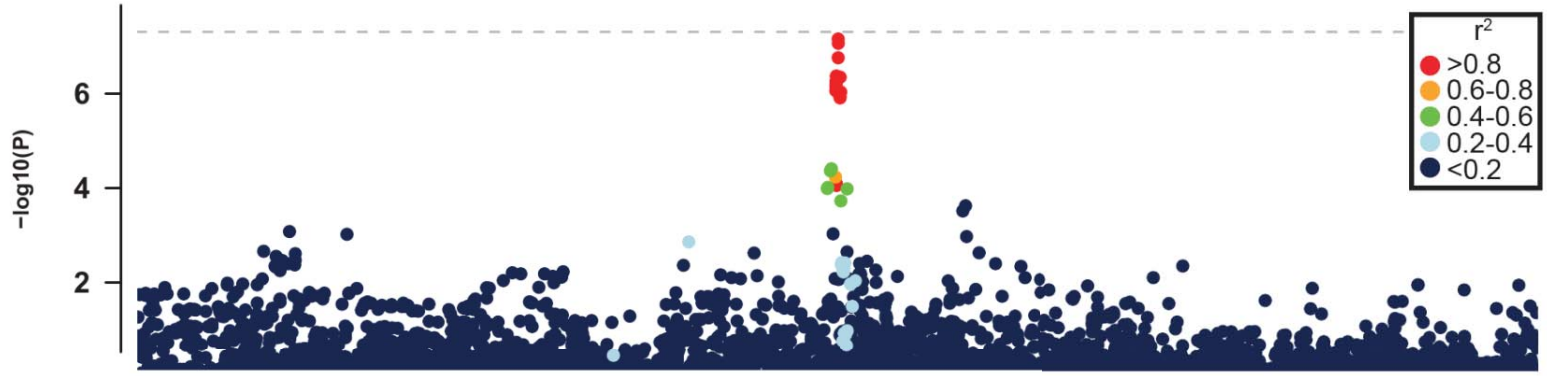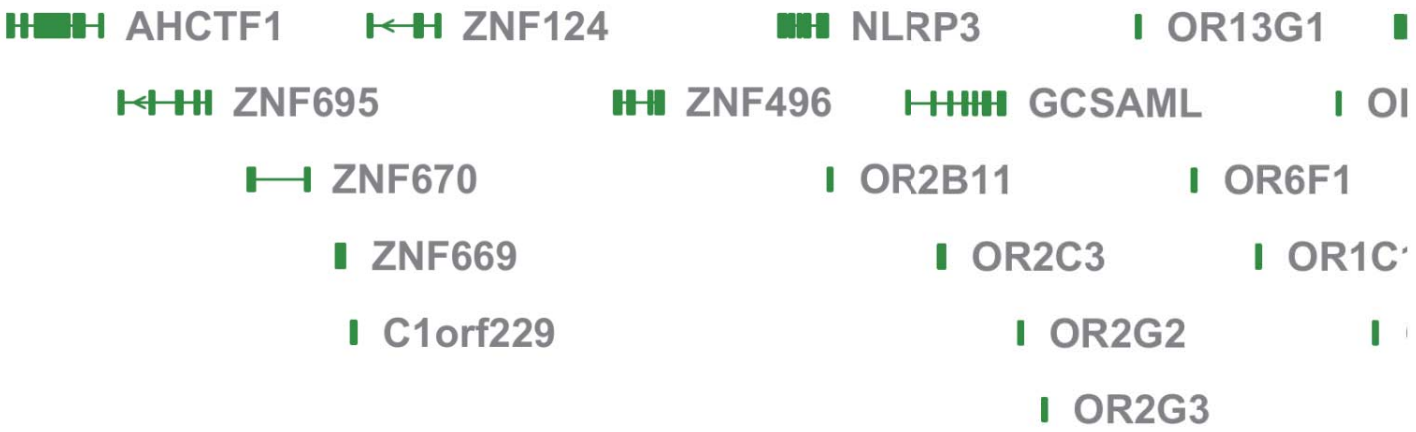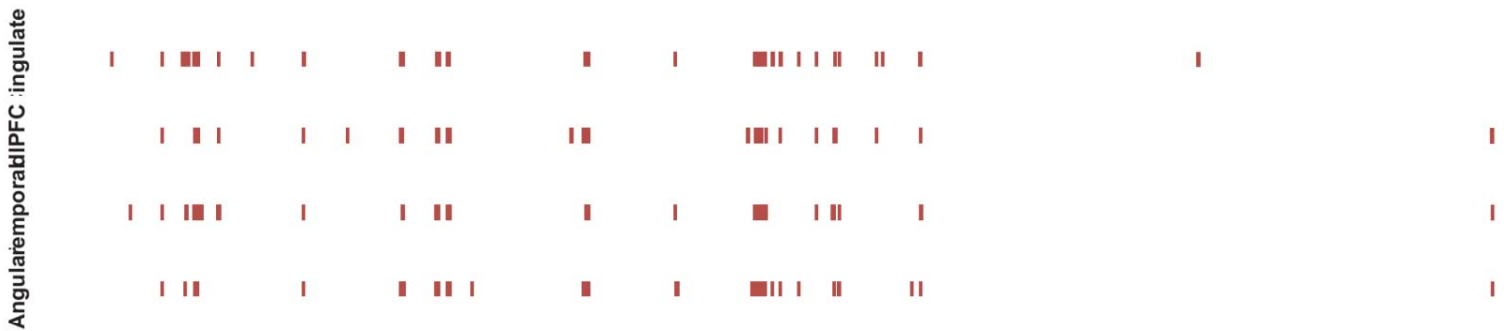

Uncorrected

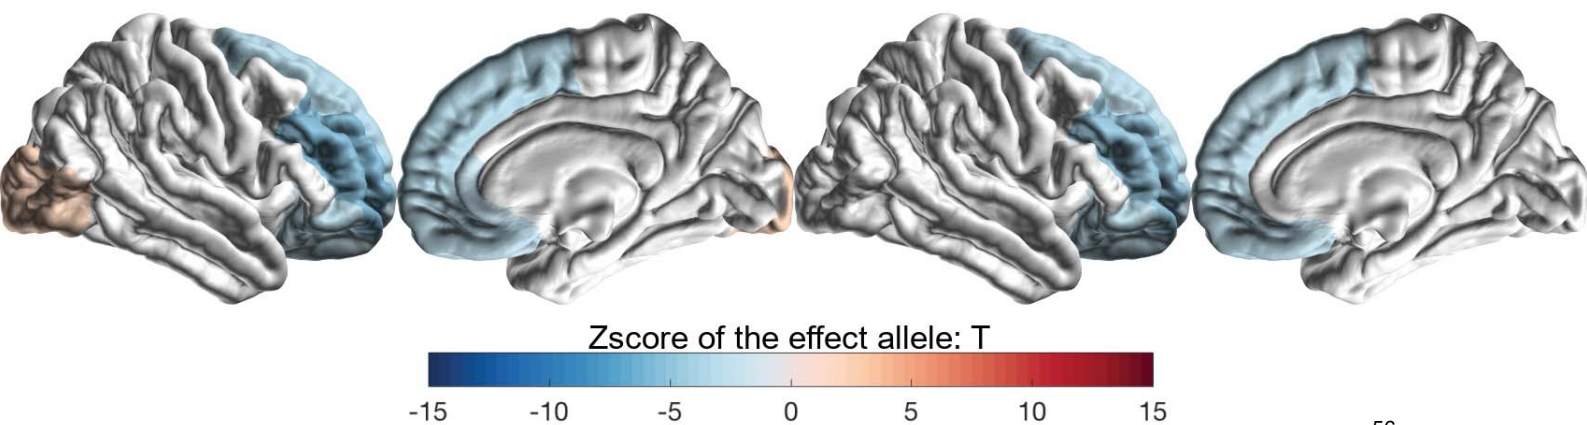



# Rostral Middle Frontal TH: rs5008703

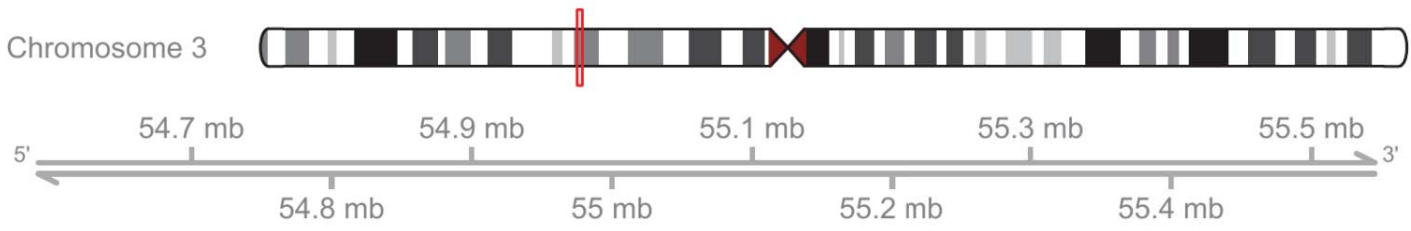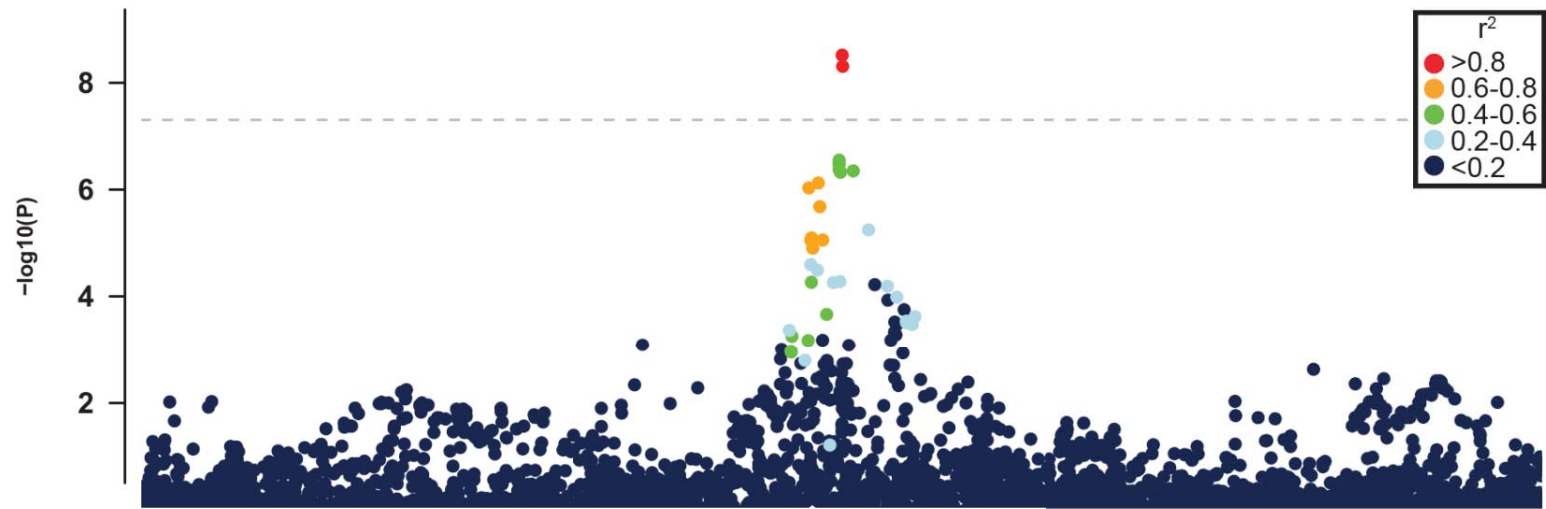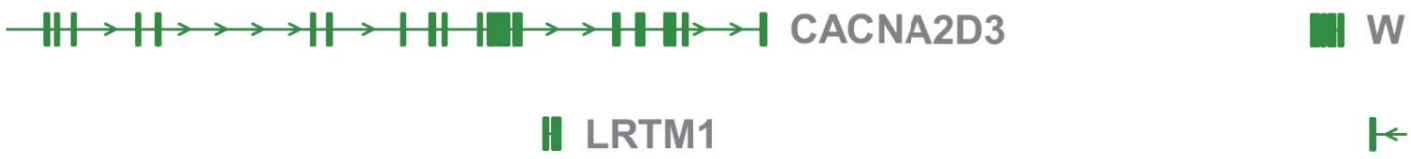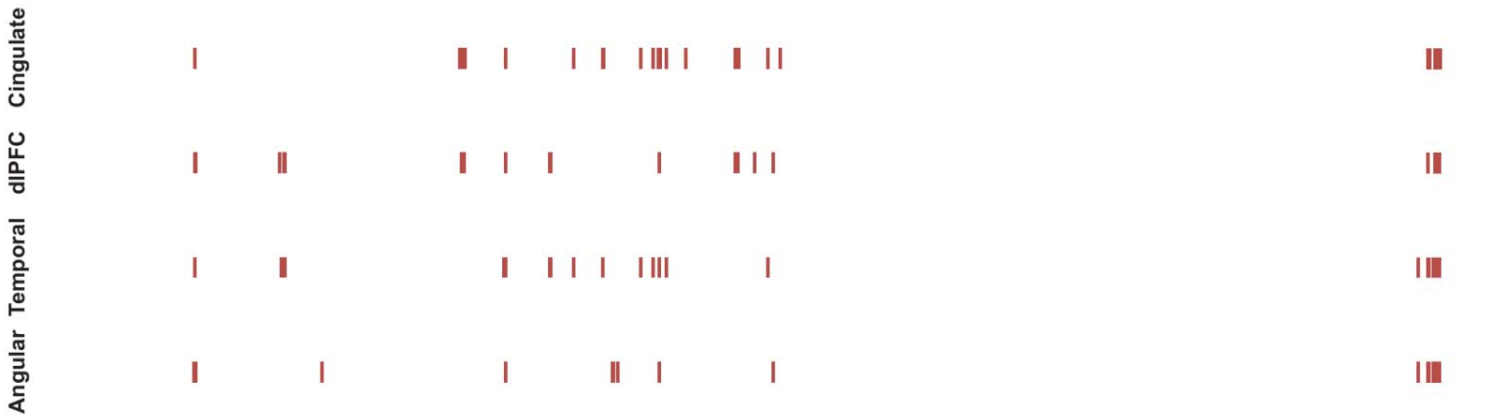

Corrected for average TH

Uncorrected

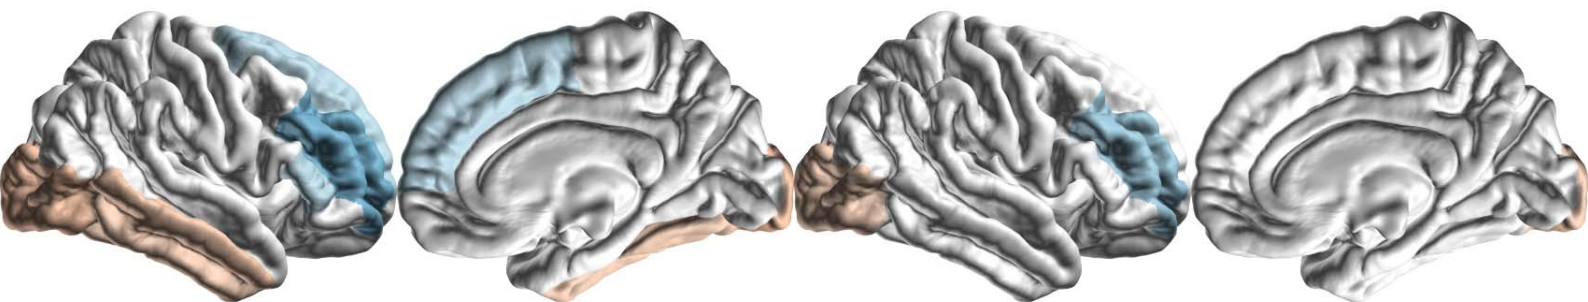

Zscore of the effect allele: A



# Pars Orbitalis SA: rs12064109

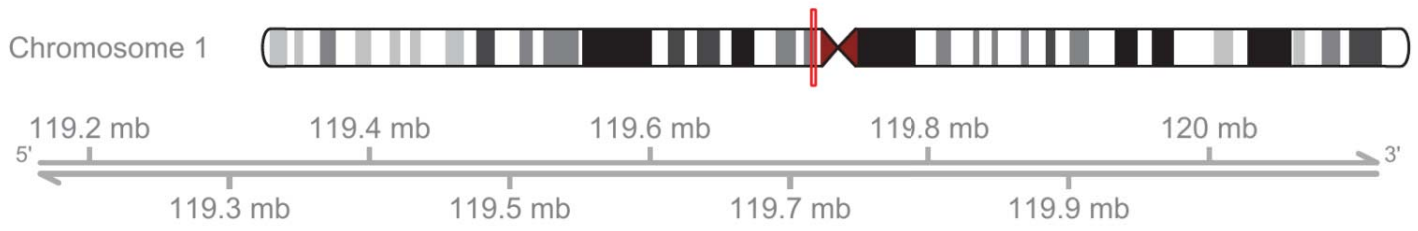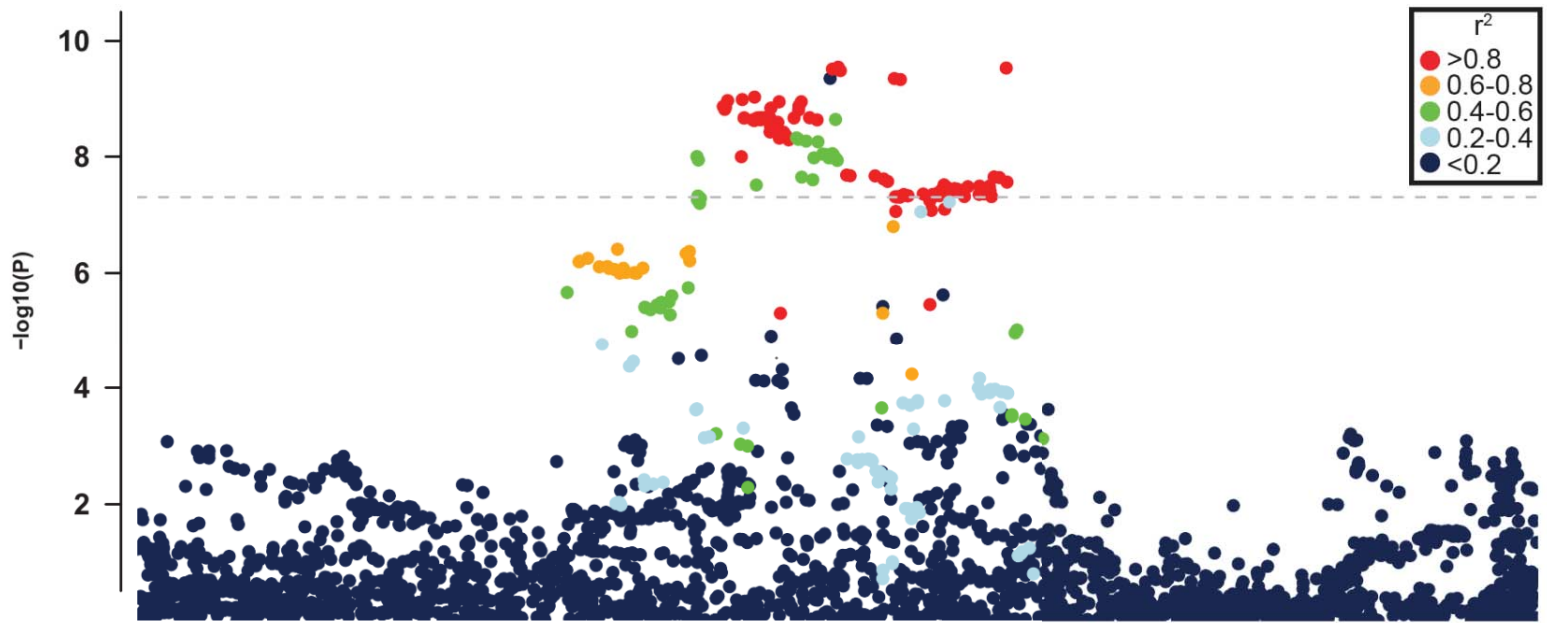

TBX15

HAO2 HSD3

WARS2

HSD3B2

GZ>CP

CP>GZ

Corrected for total SA

Uncorrected

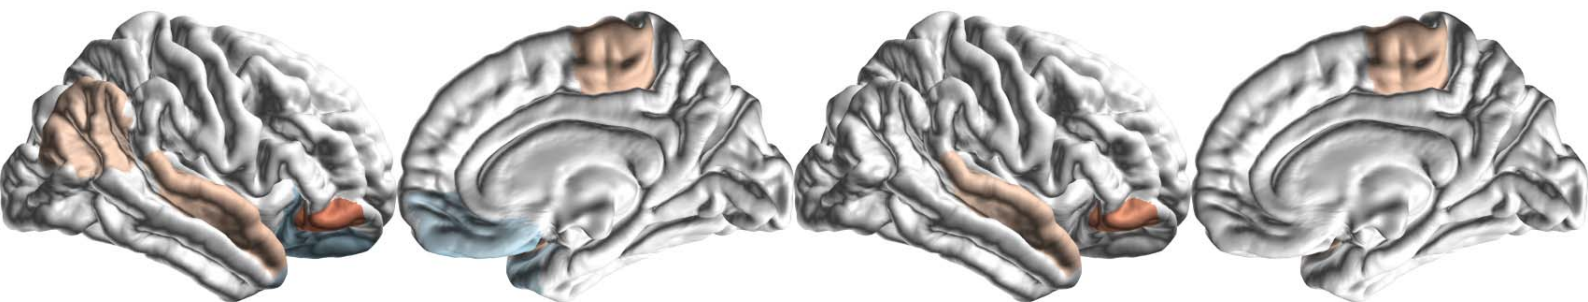

Zscore of the effect allele: T

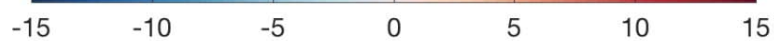

### Pars Orbitalis SA: rs2287283

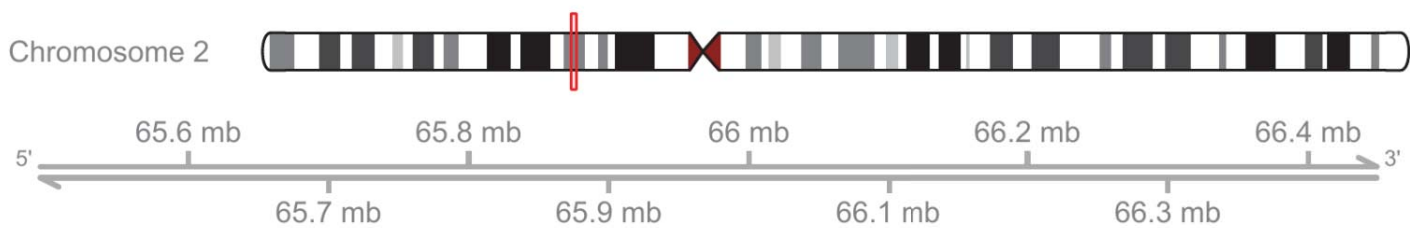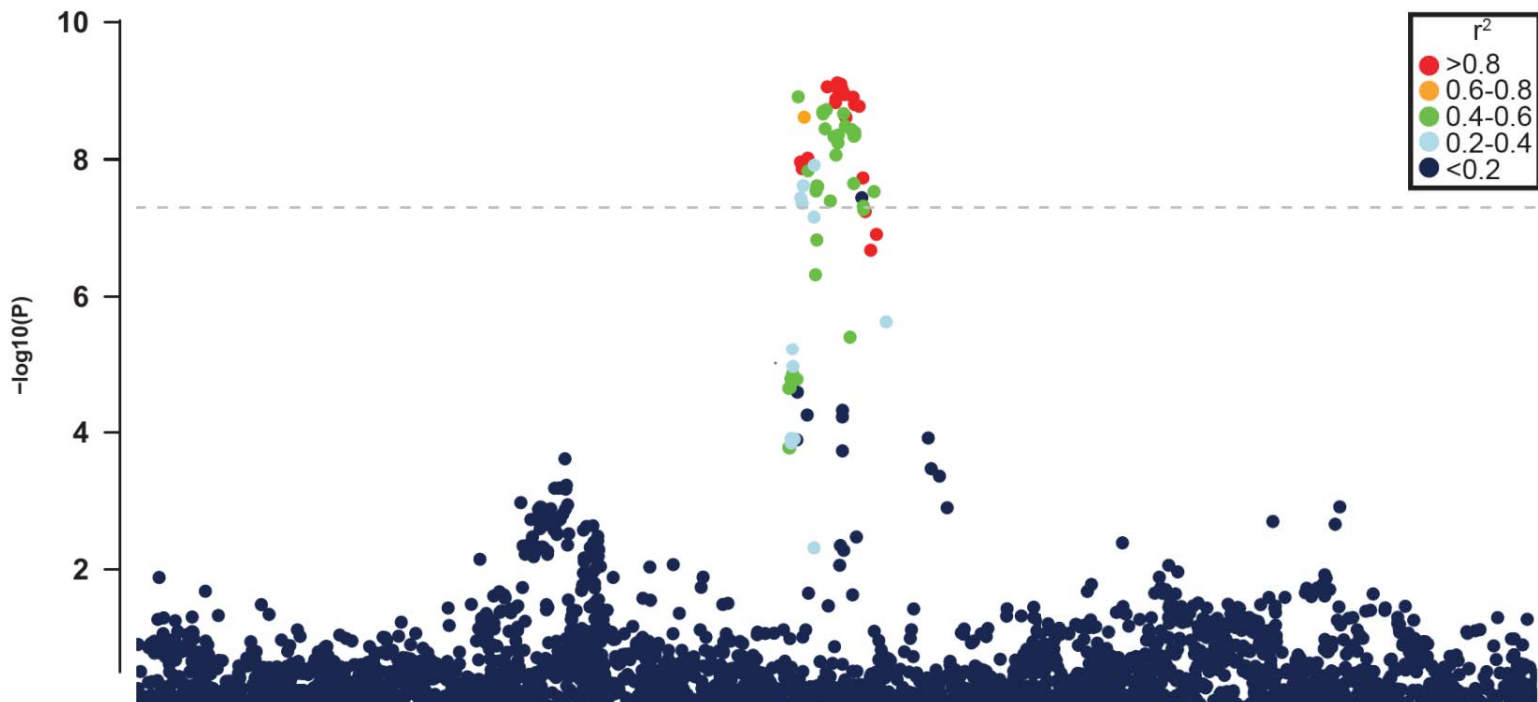

AC1R2 ← SPRED2

GZ>CP

CP>GZ

Corrected for total SA

Uncorrected

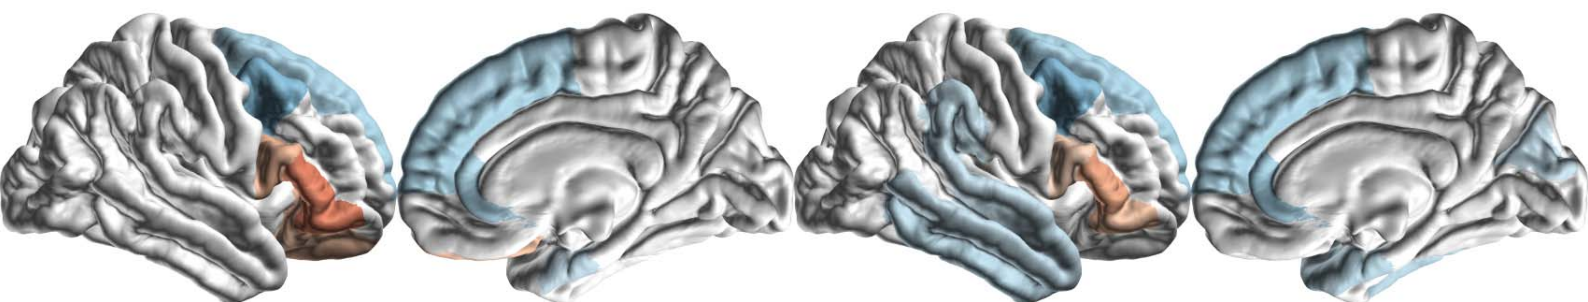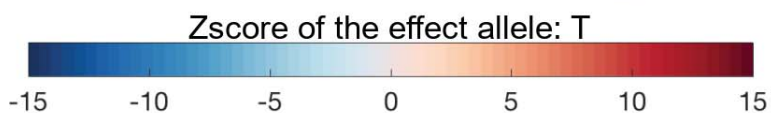



# Pars Orbitalis SA: rs6551313

Chromosome 3

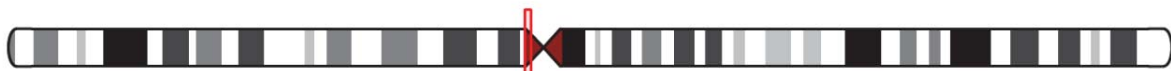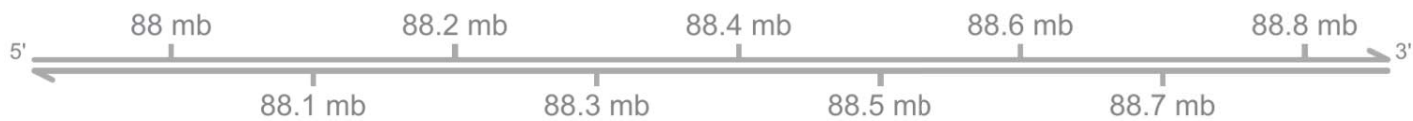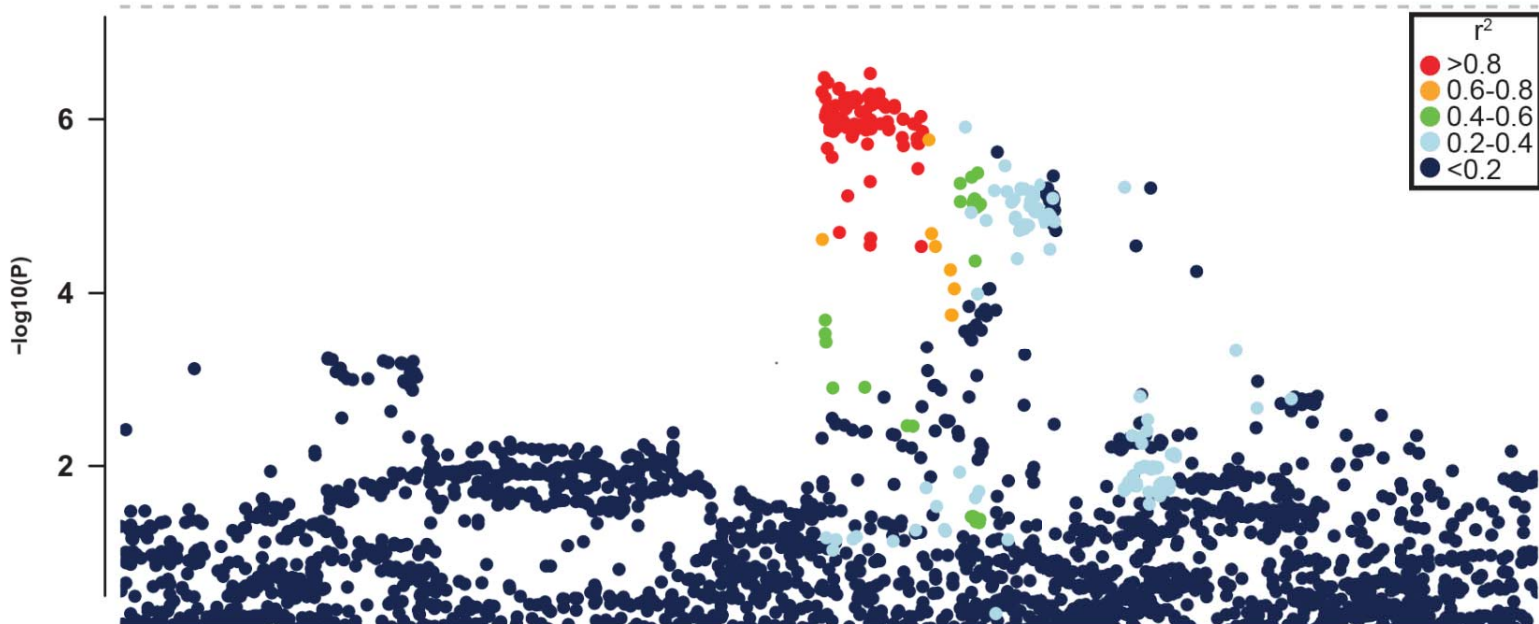

HTR1F GG G ZNF654

C3orf38

GZ>CP

CP>GZ

Corrected for total SA

Uncorrected

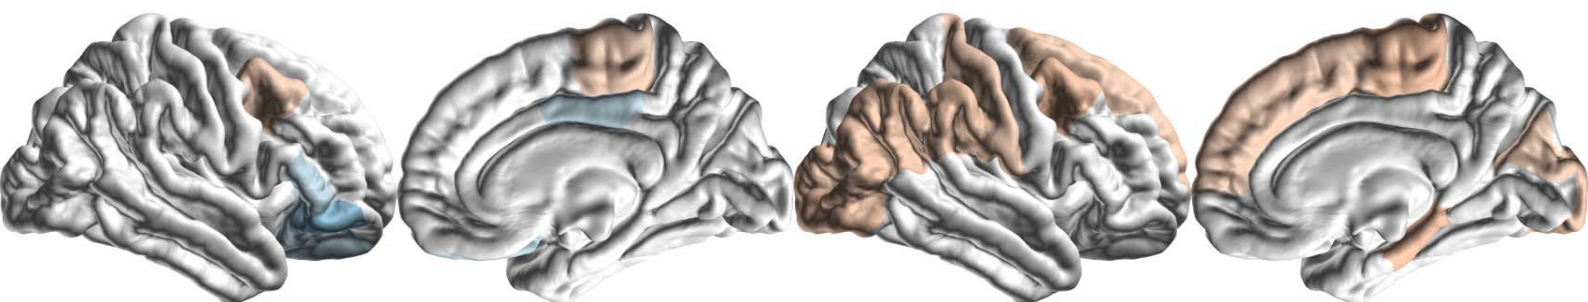

Zscore of the effect allele: A



### Pars Orbitalis SA: rs2262601

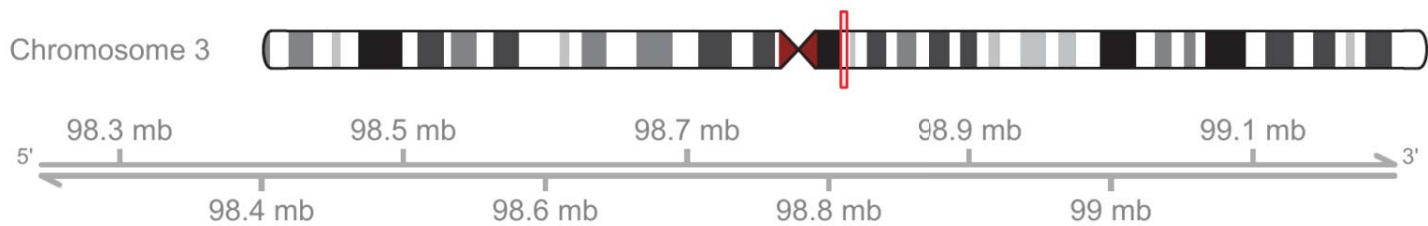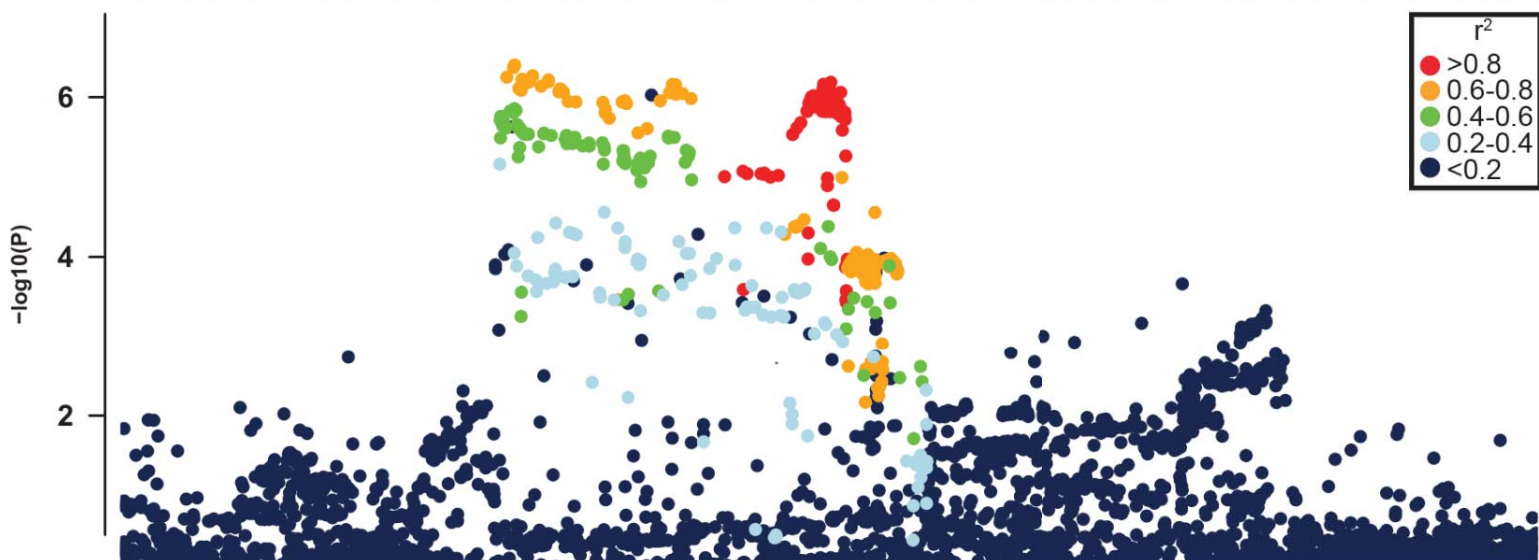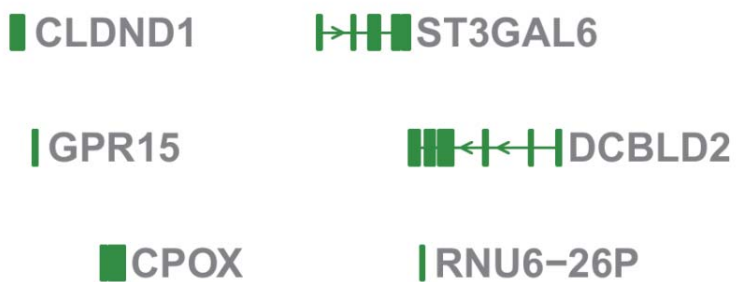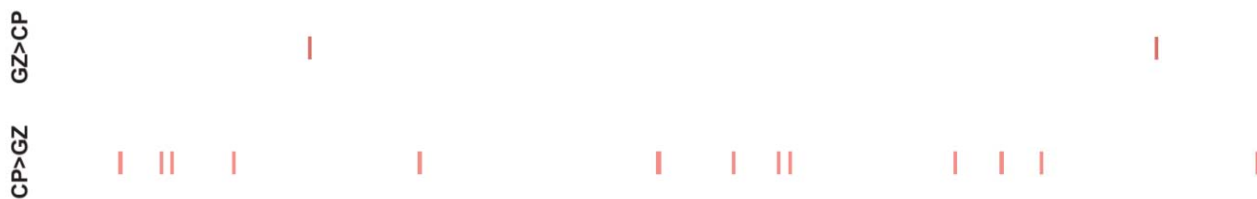

Corrected for total SA

Uncorrected

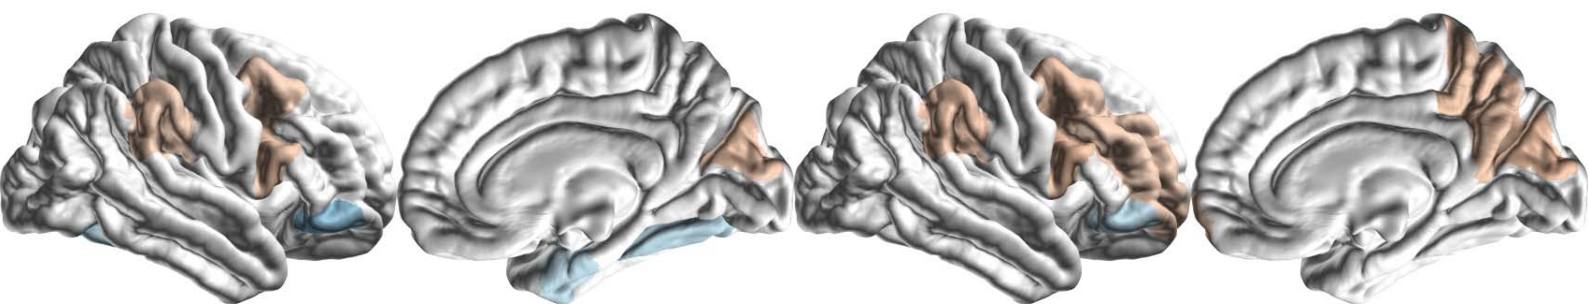

# Pars Orbitalis SA: rs61901866

Chromosome 11

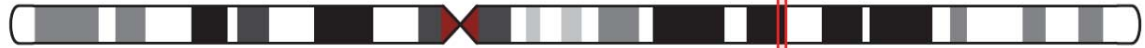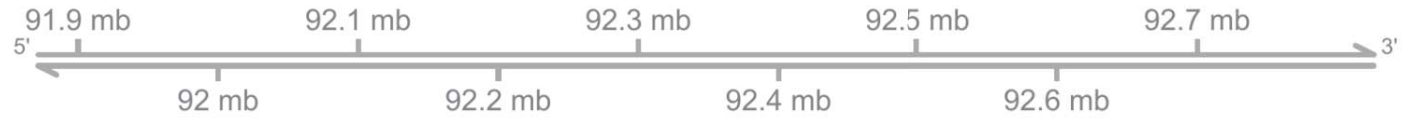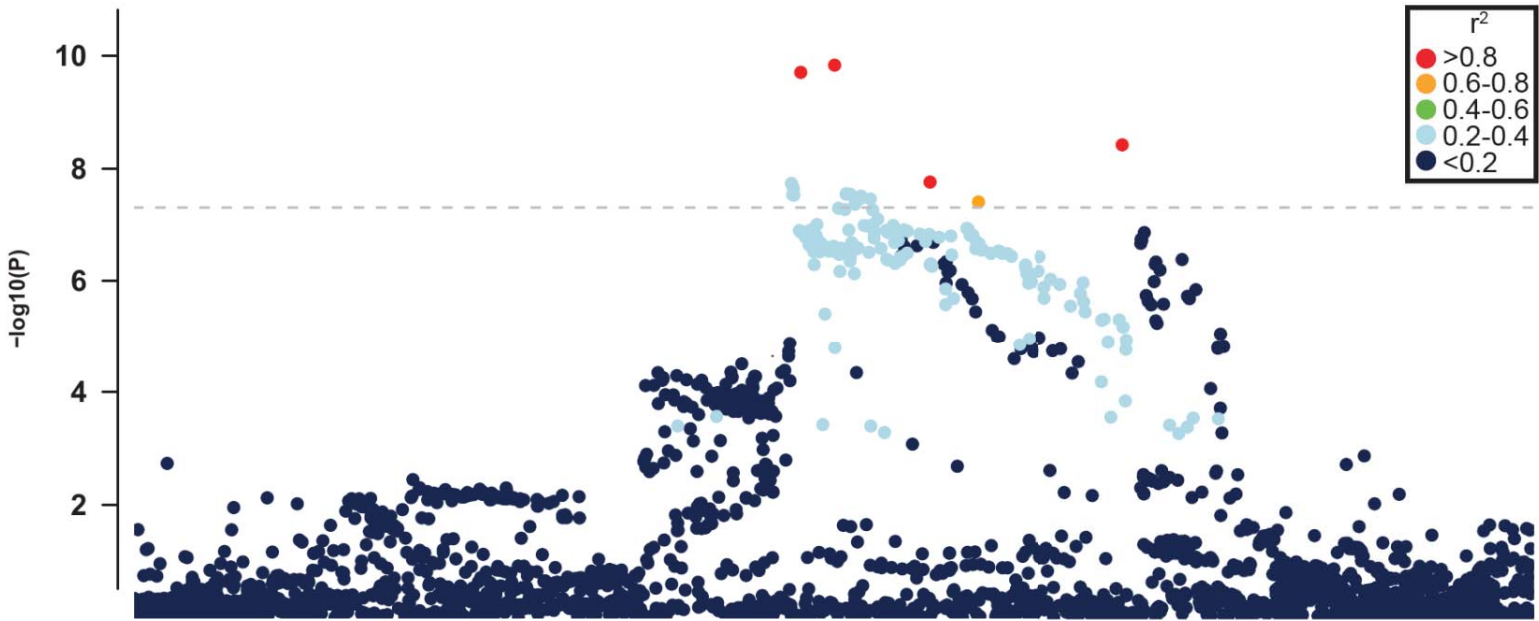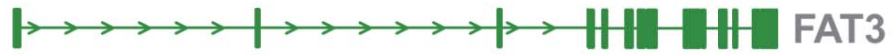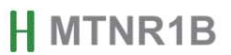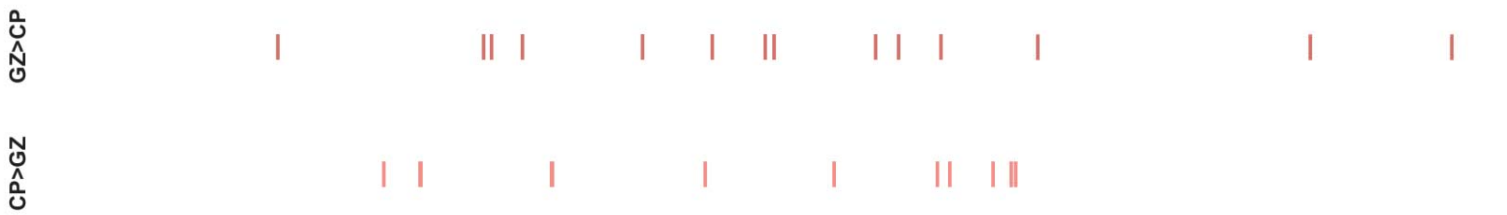

Corrected for total SA

Uncorrected

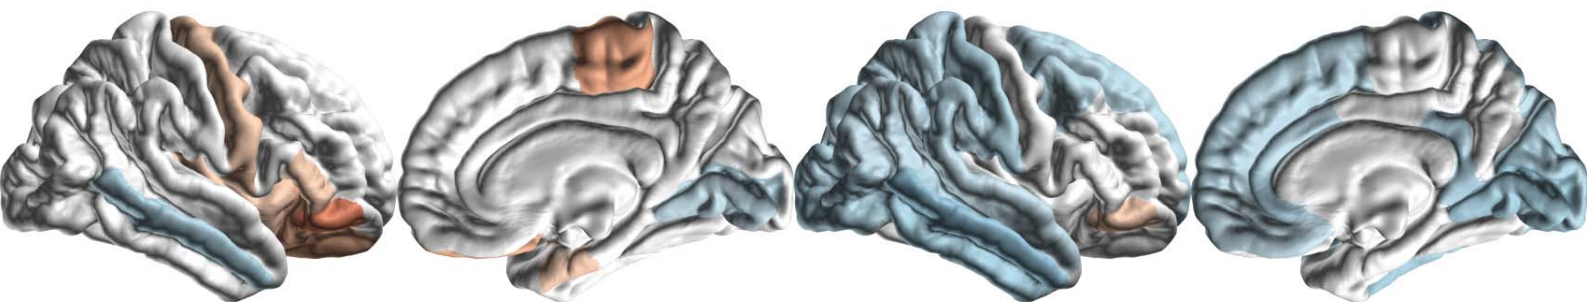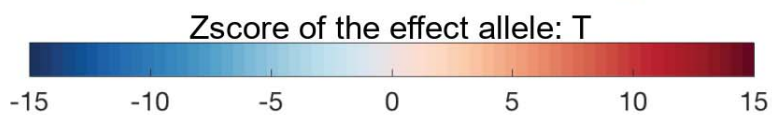



### Pars Orbitalis SA: rs7147119

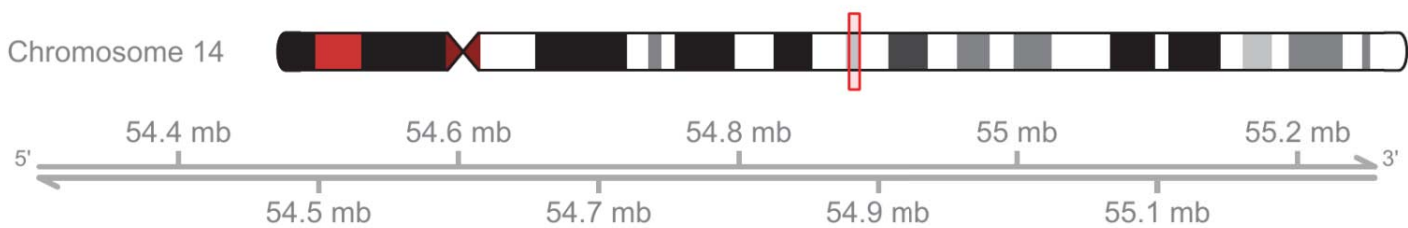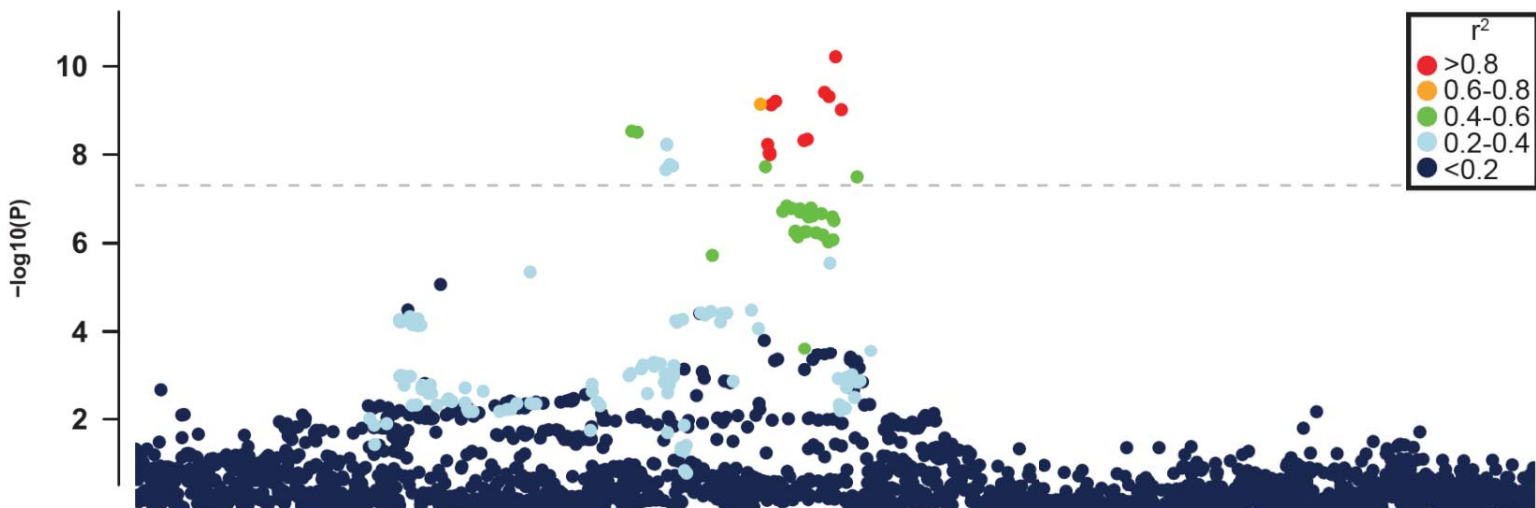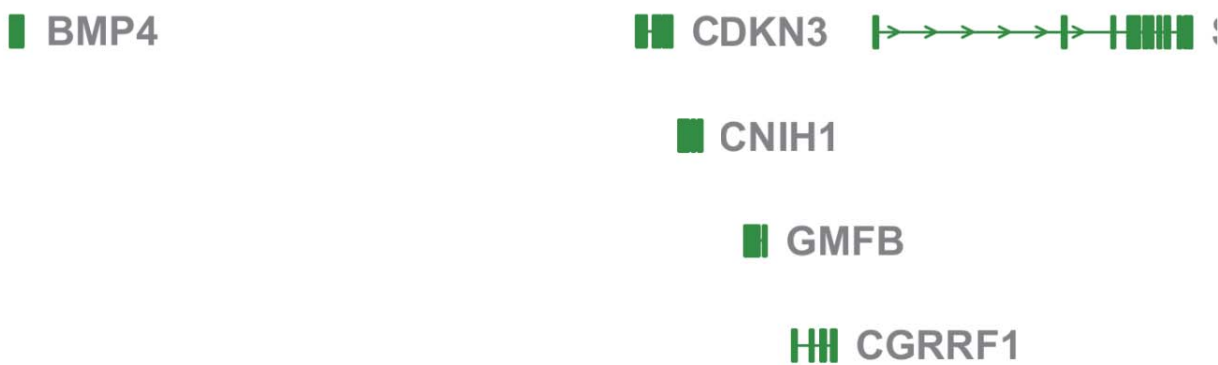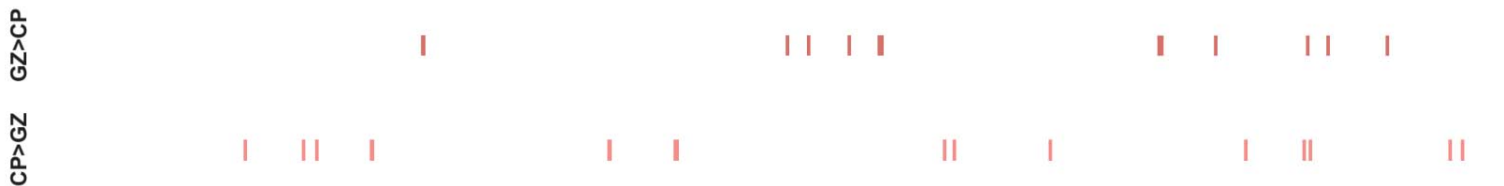

Corrected for total SA

Uncorrected

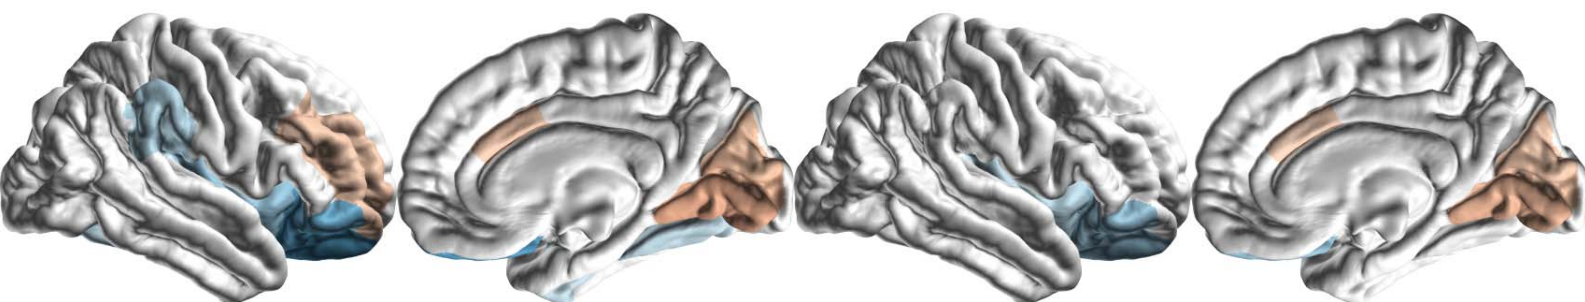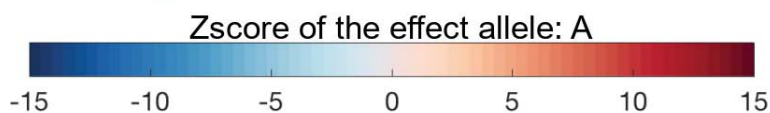

# Pars Triangularis SA: rs2287283

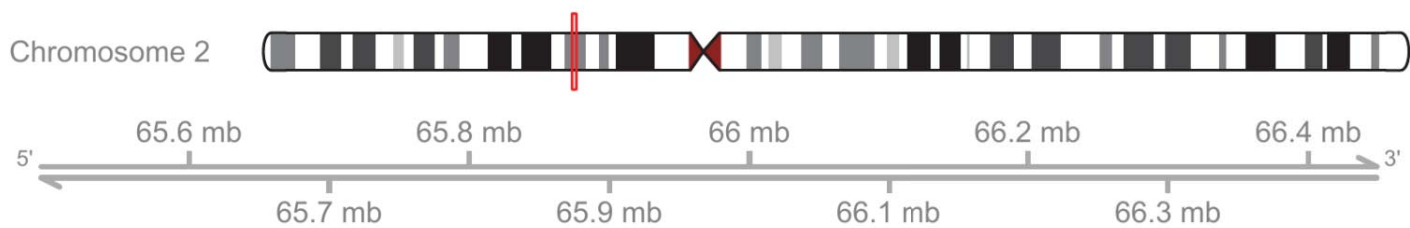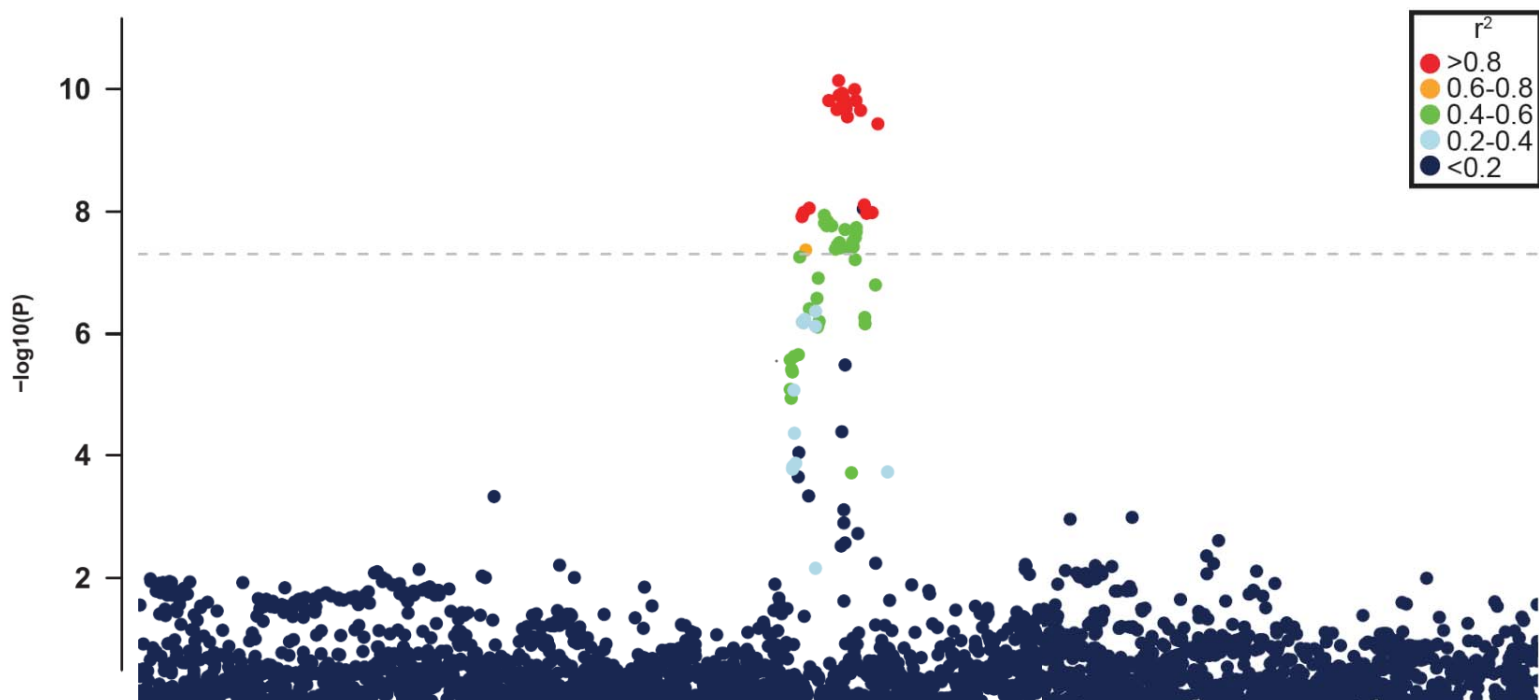

ACTR2 ← SPRED2

GZ>CP

CP>GZ

Corrected for total SA

Uncorrected



Zscore of the effect allele: T

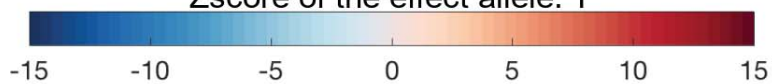

# Pars Triangularis SA: rs2279829

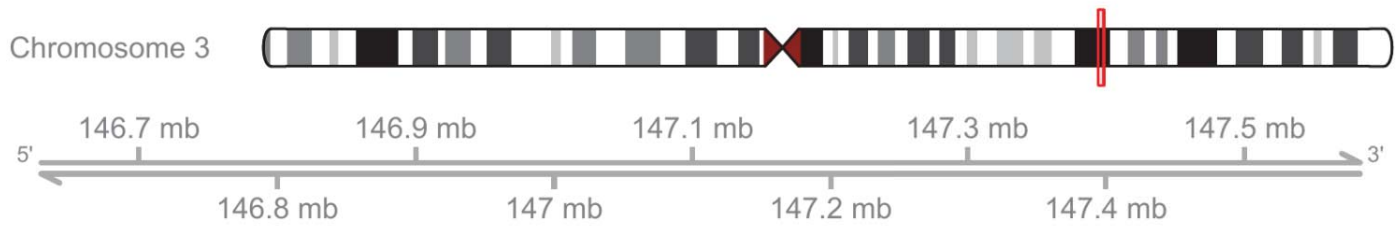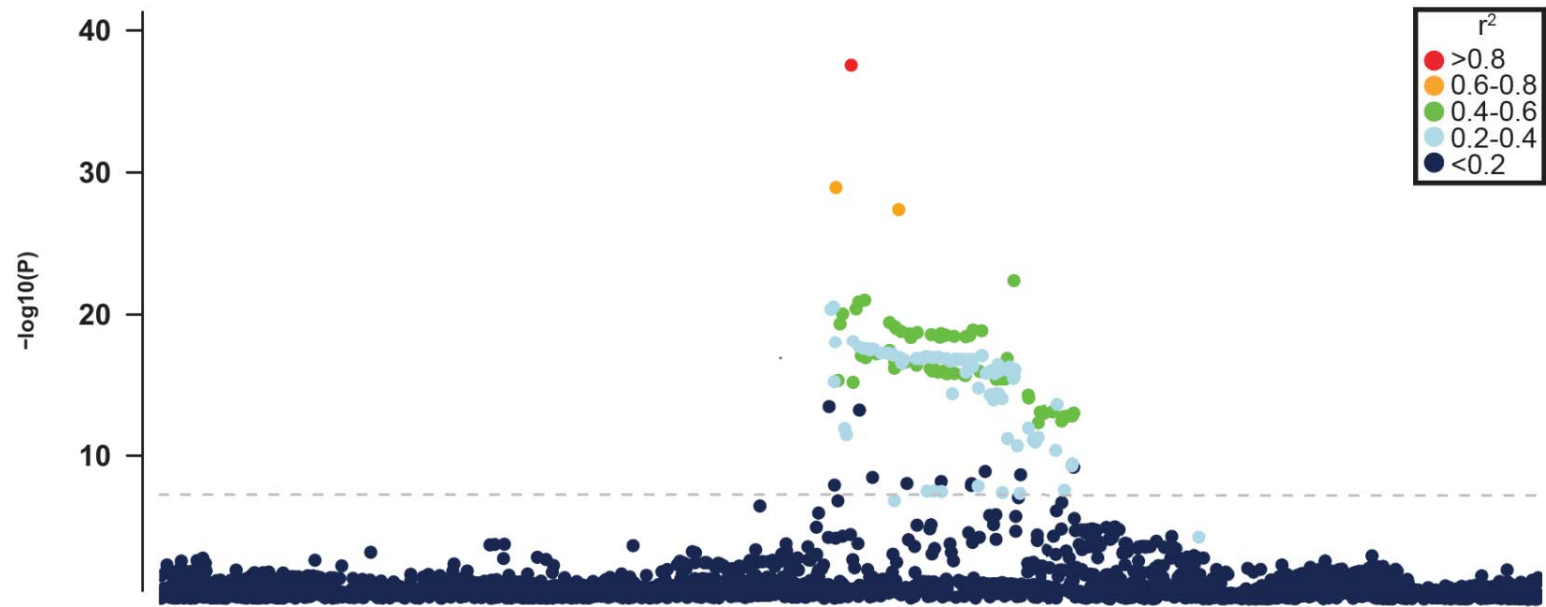

ZIC4

ZIC1

GZ>CP

CP>GZ

Corrected for total SA

Uncorrected

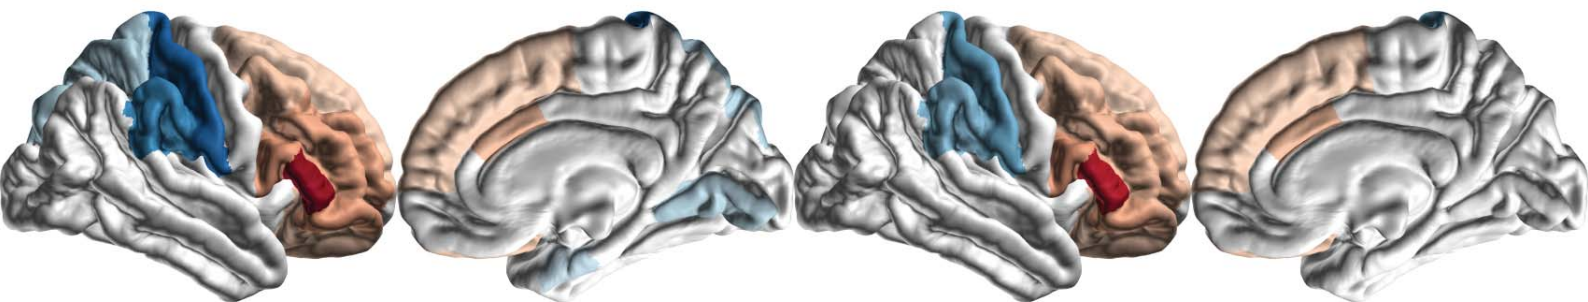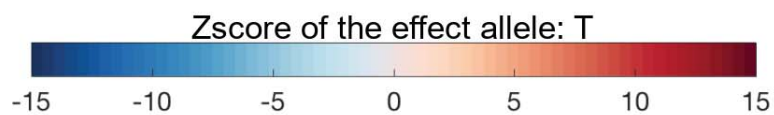



# Pars Triangularis SA: rs10278627

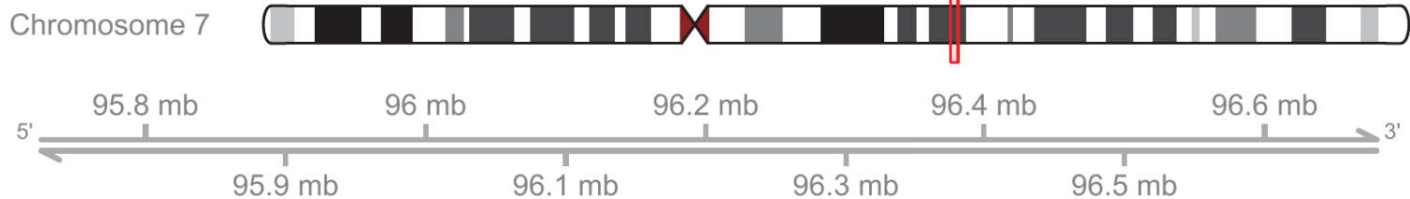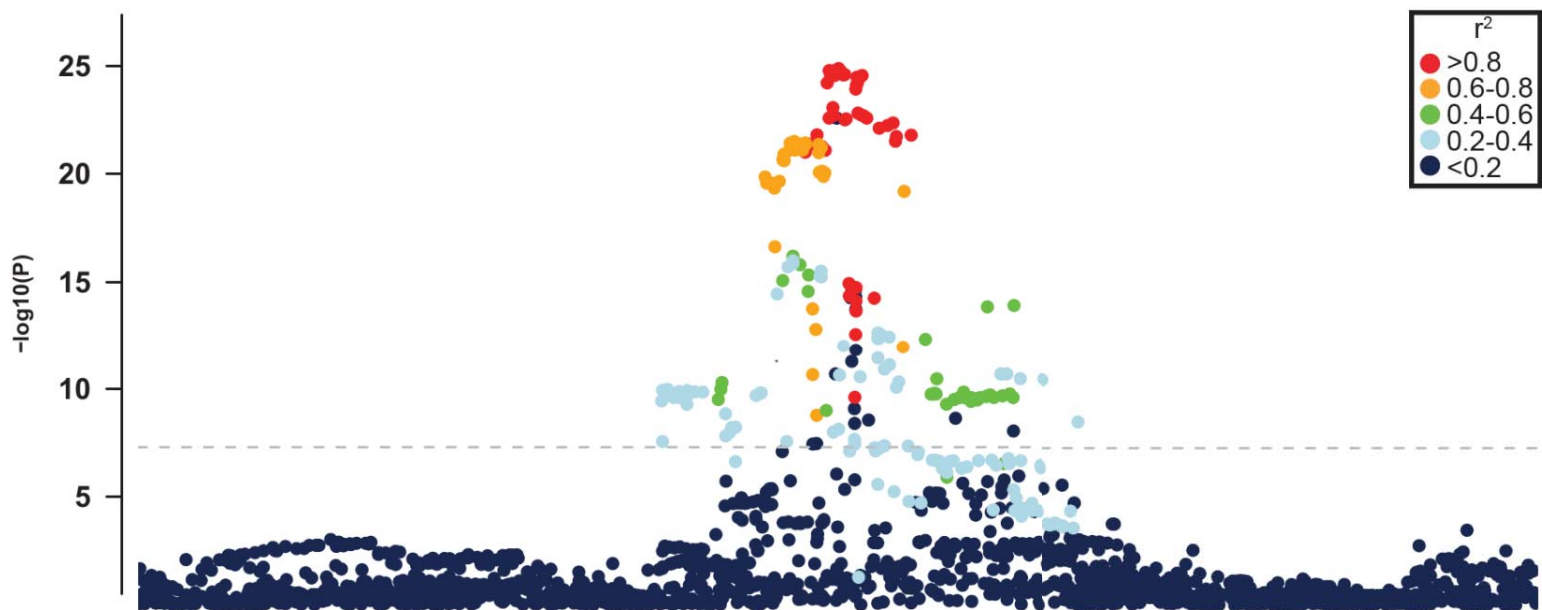

Genes: DYNC111, C7orf76, SHFM1, DLX5

Gene: SLC25A13, DLX5

GZ>CP

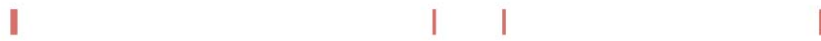

CP>GZ

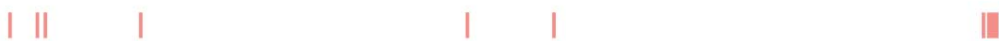

Corrected for total SA

Uncorrected

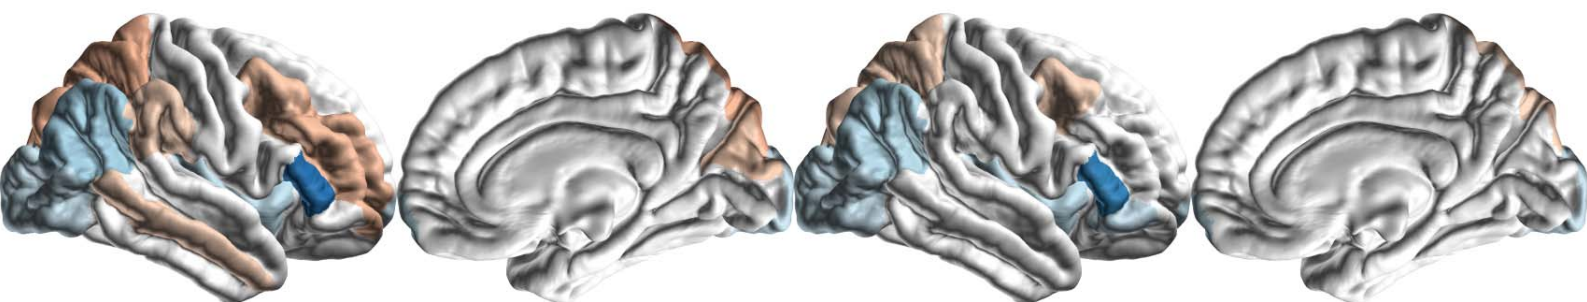

# Pars Triangularis SA: rs59614433

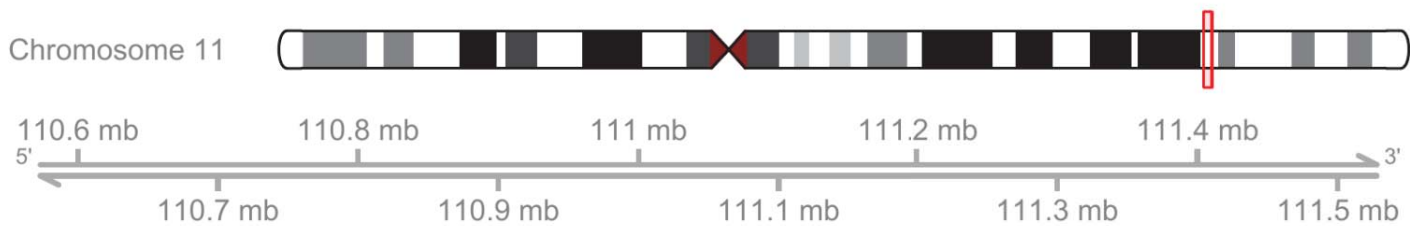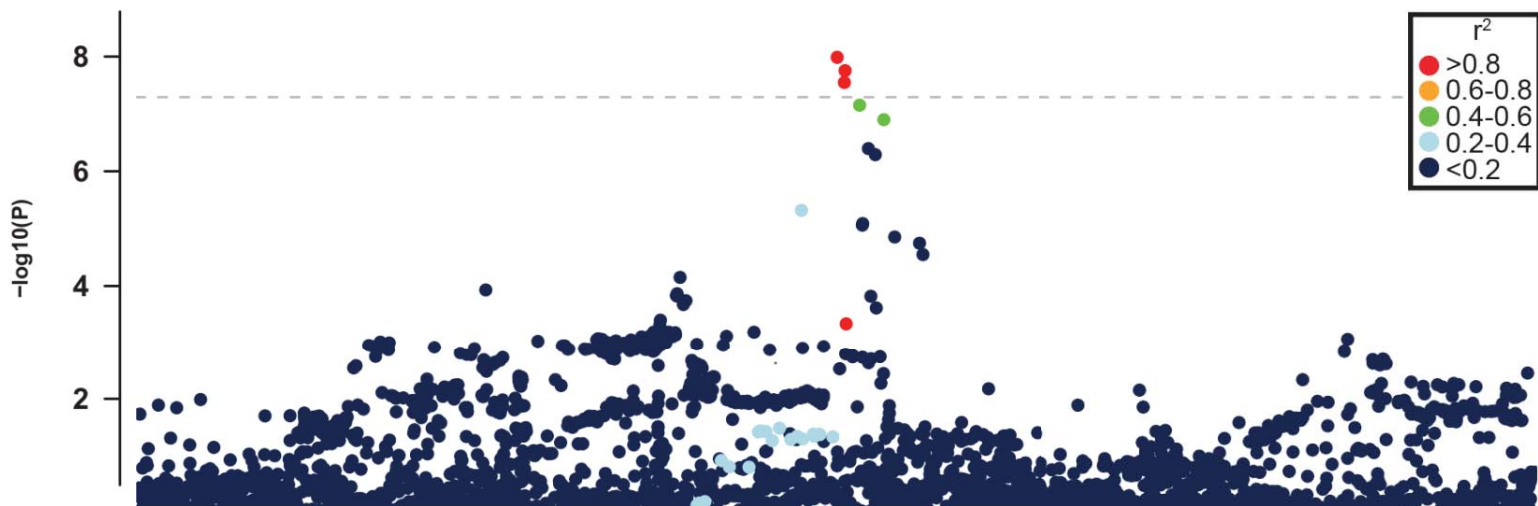

ARHGAP20

C11orf53

C11orf88

COLCA2

LAYN

POU2AF1

→

← BTG4

CP>GZ

GZ>CP

Corrected for total SA

Uncorrected

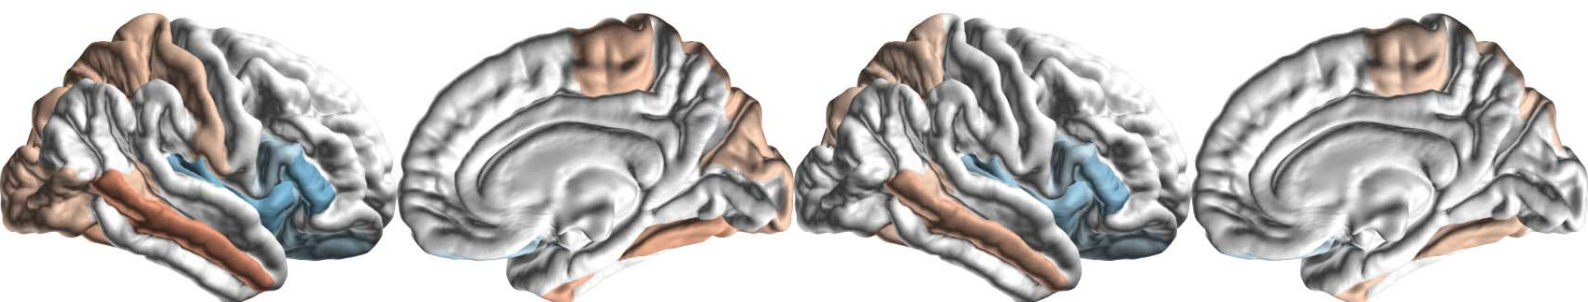

Zscore of the effect allele: T



# Pars Triangularis SA: rs7996803

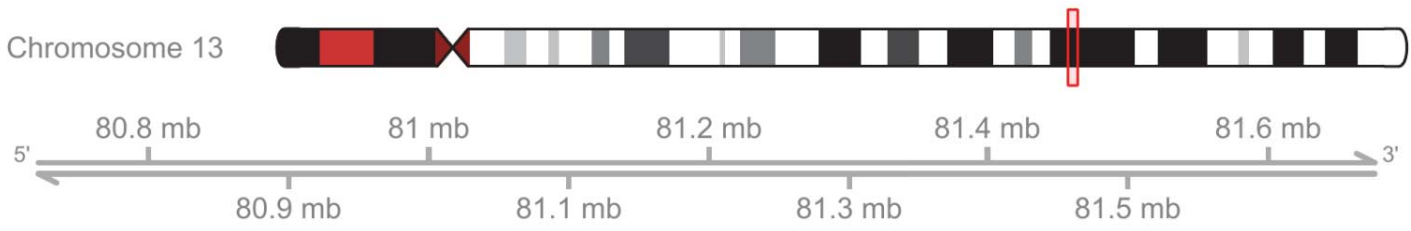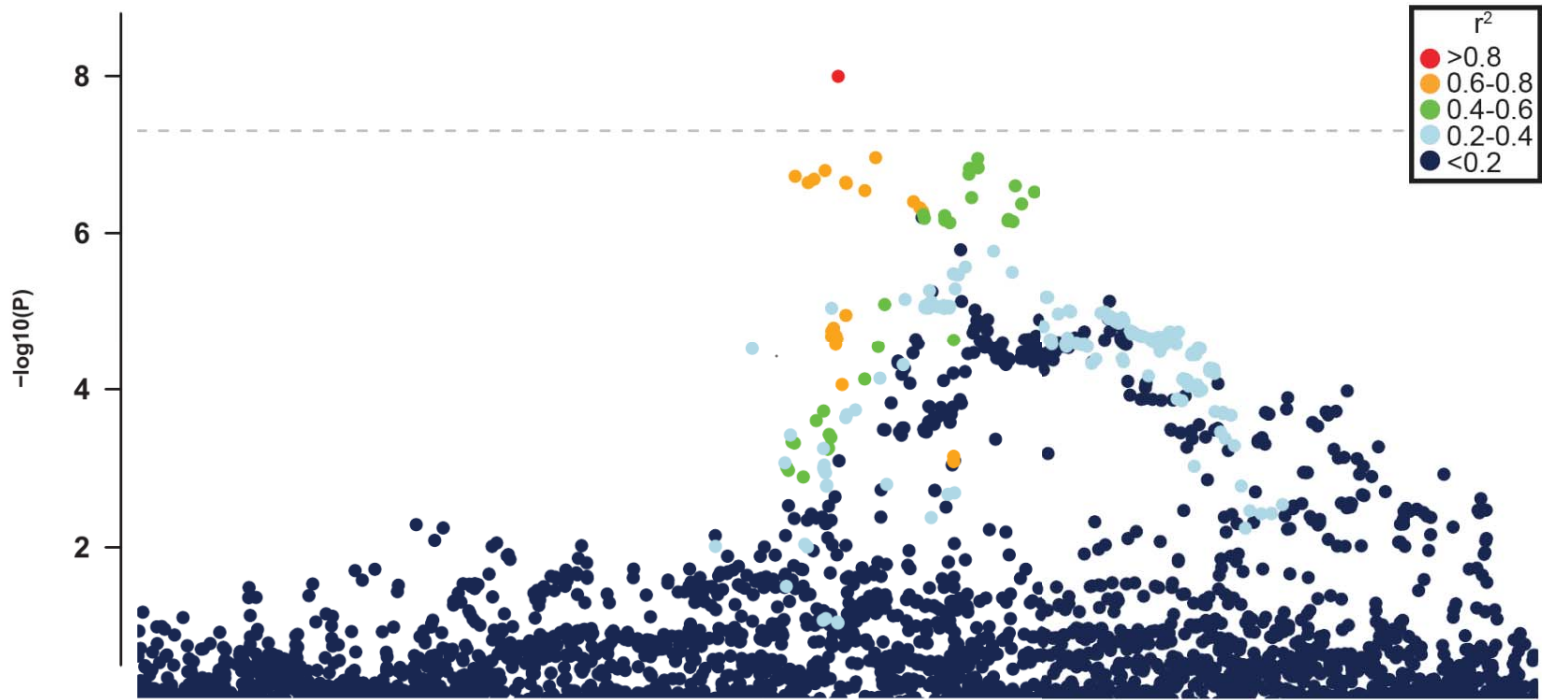

SPRY2

GZ>CP

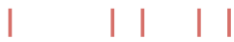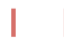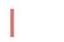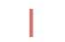

CP>GZ

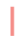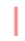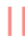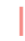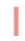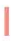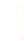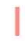

Corrected for total SA

Uncorrected

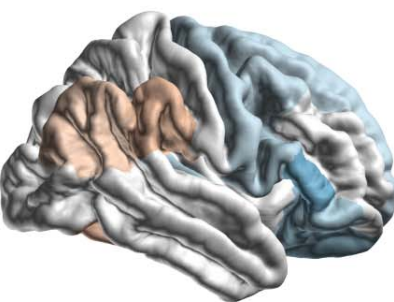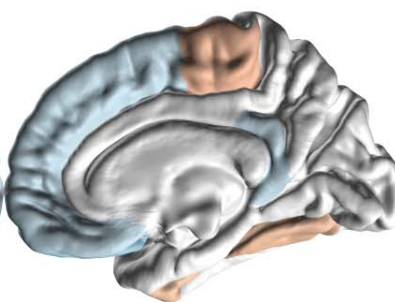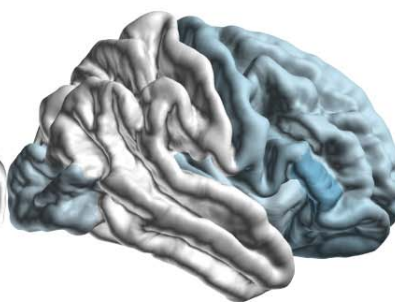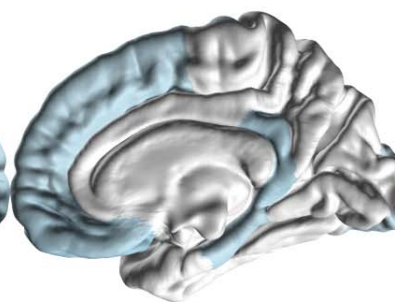

Zscore of the effect allele: T

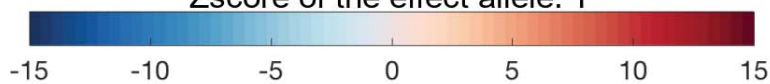



# Pars Triangularis SA: rs4924345

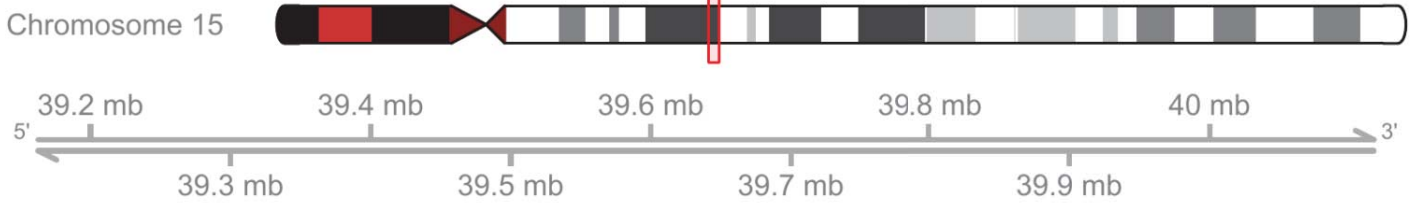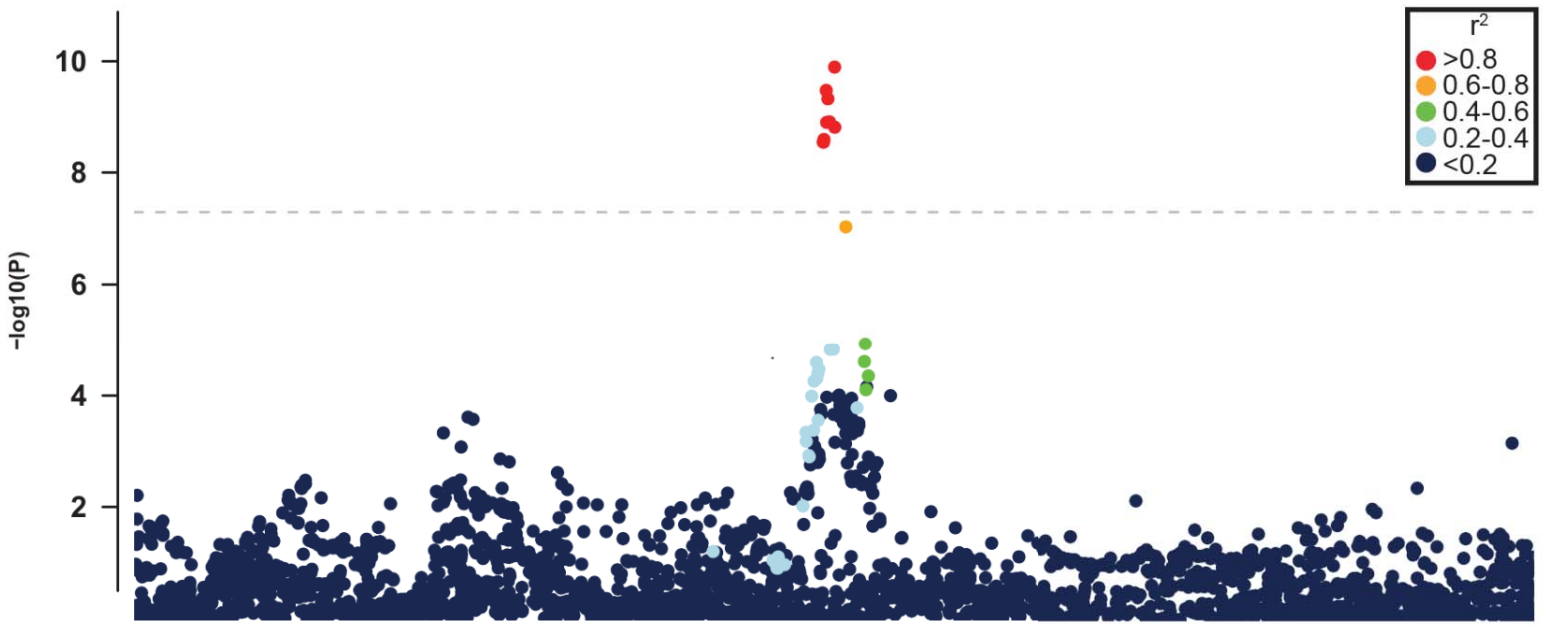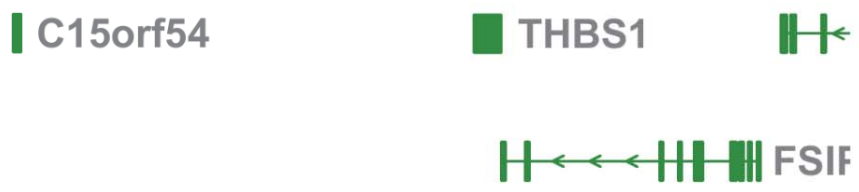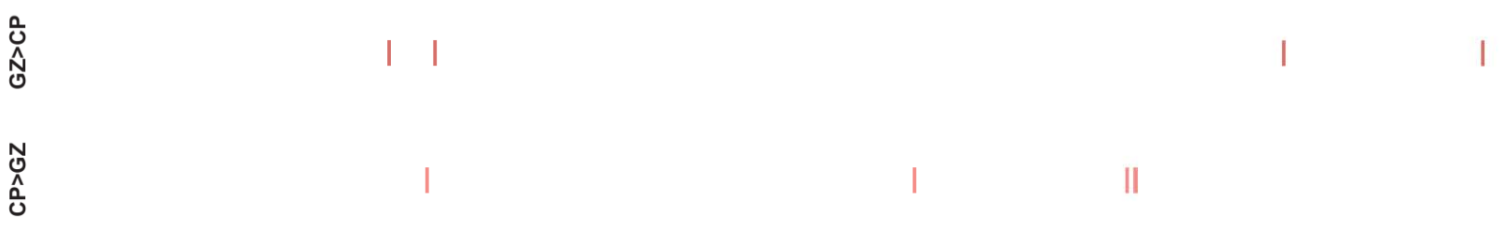

Corrected for total SA

Uncorrected

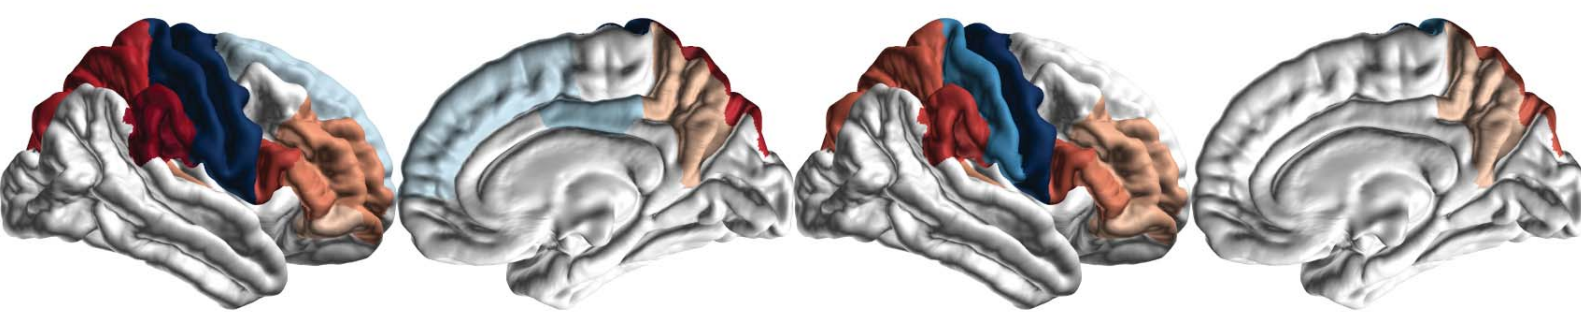

# Pars Triangularis SA: rs1125867

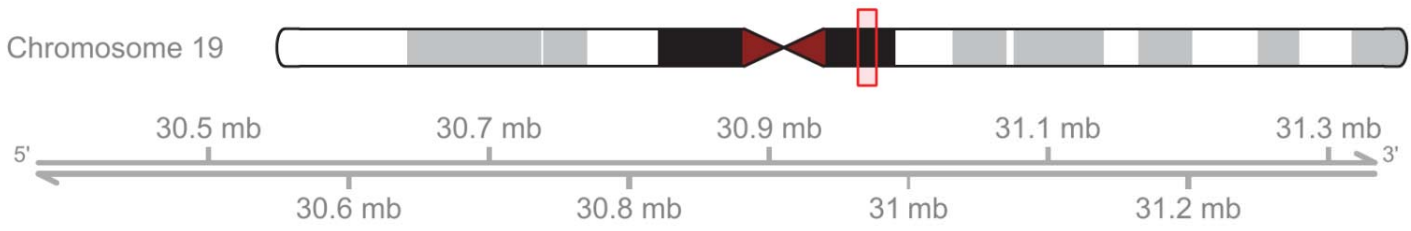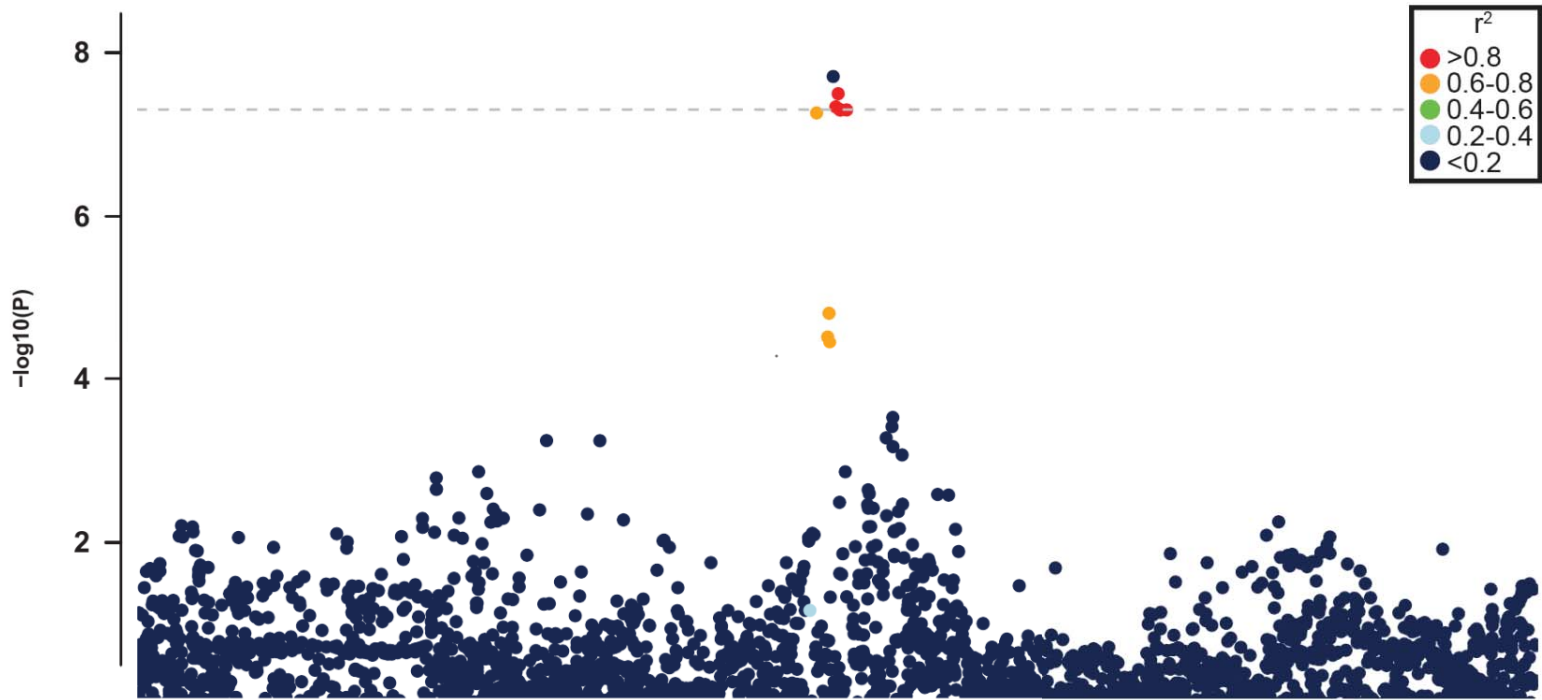

URI1

ZNF536

GZ>CP

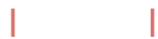

CP>GZ

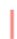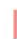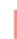

Corrected for total SA

Uncorrected

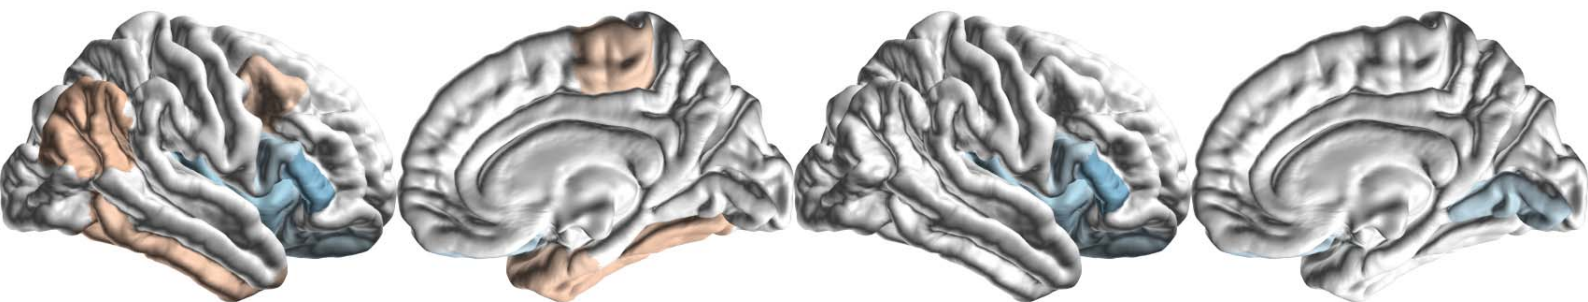

Zscore of the effect allele: A



# Pars Opercularis SA: rs1159974

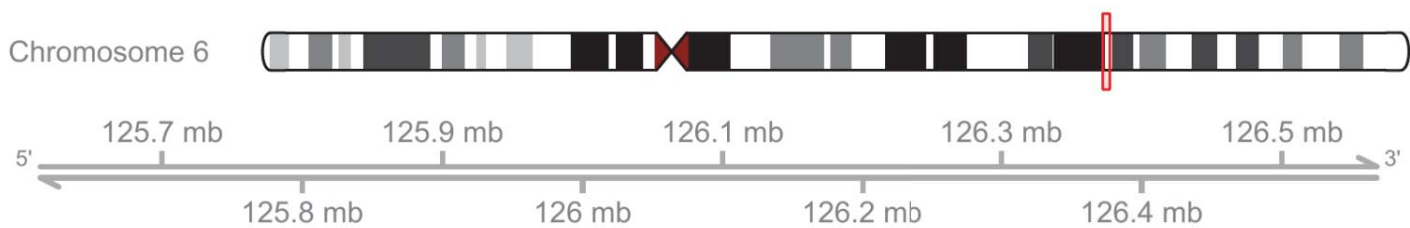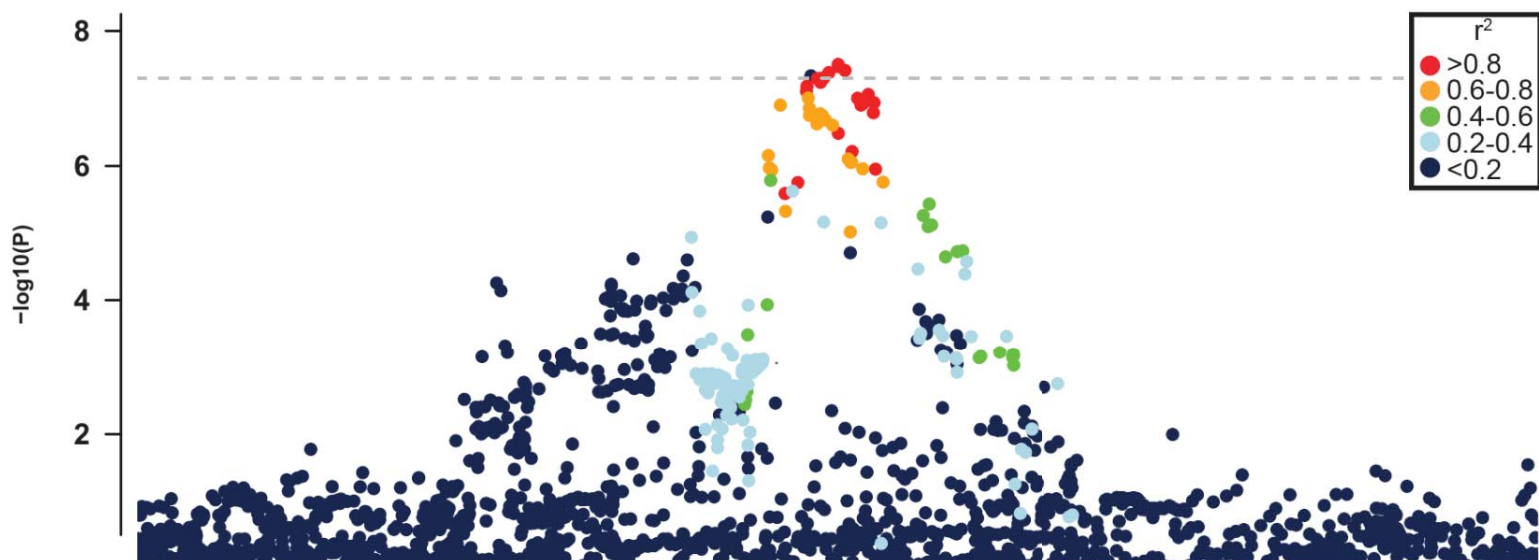

HDDC2

HEY2

HINT3

NCOA7

TRMT11

GZ>CP  
CP>GZ

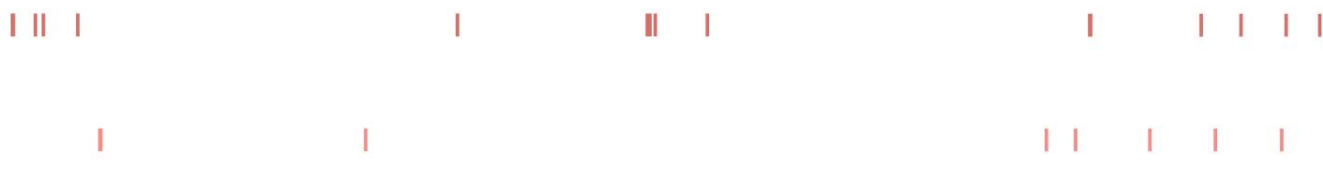

Corrected for total SA

Uncorrected

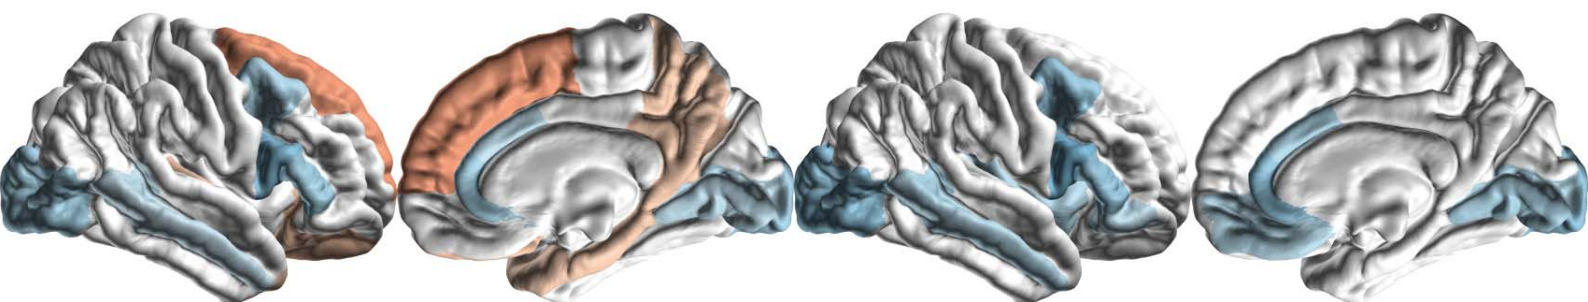

Zscore of the effect allele: T

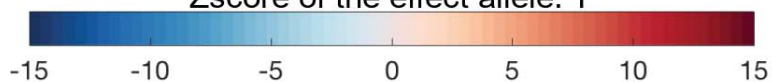



# Pars Opercularis SA: rs2033939

Chromosome 15

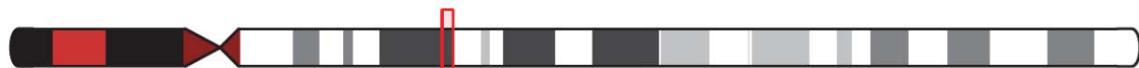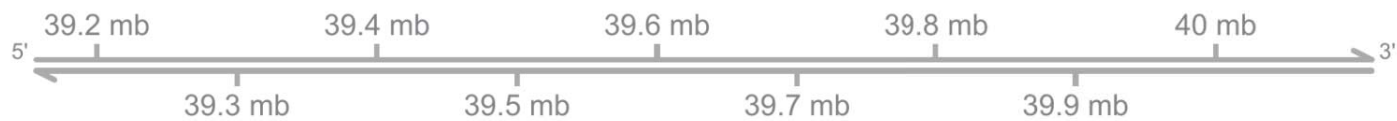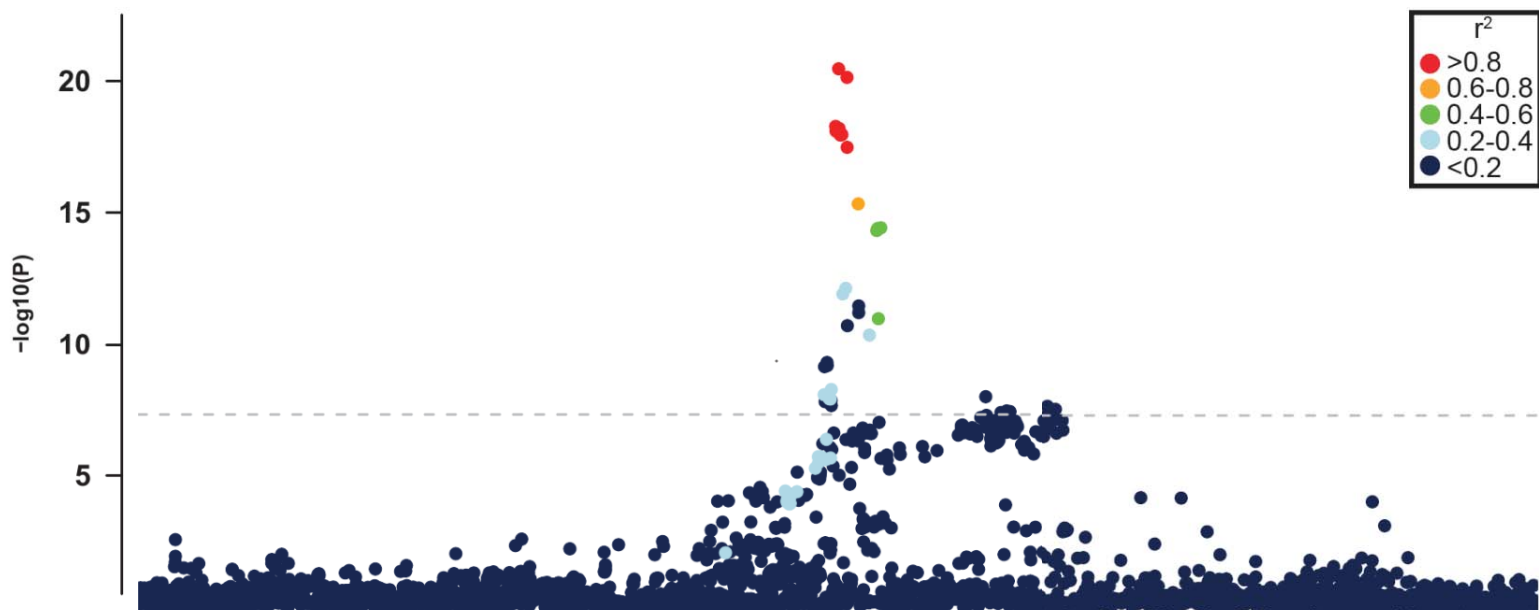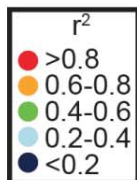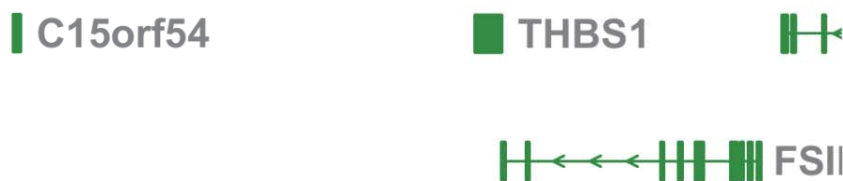

GZ>CP  
CP>GZ

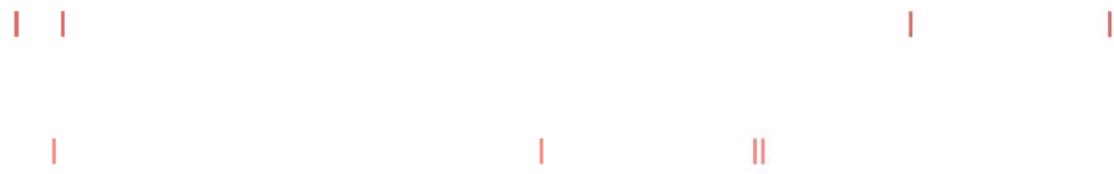

Corrected for total SA

Uncorrected

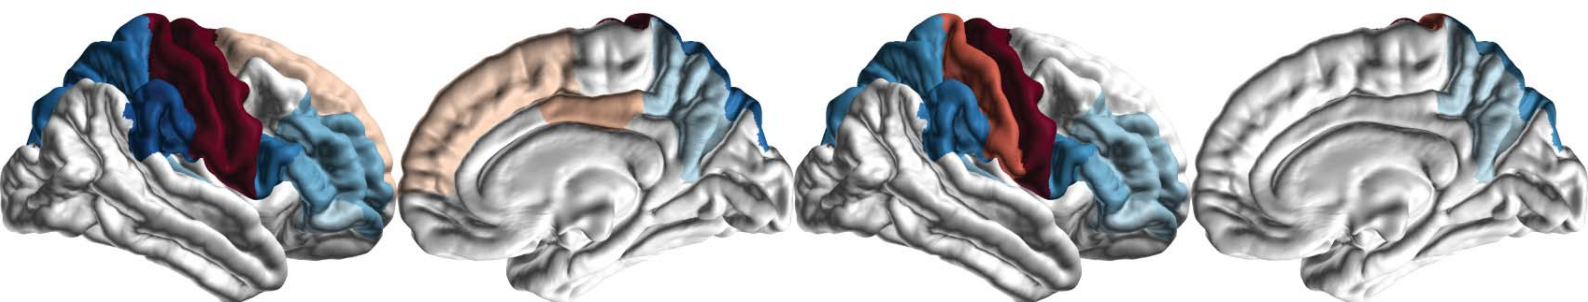

Zscore of the effect allele: A

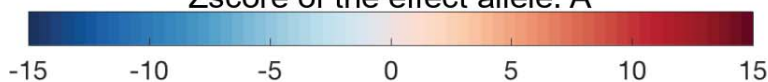

# Pars Opercularis SA: rs12938190

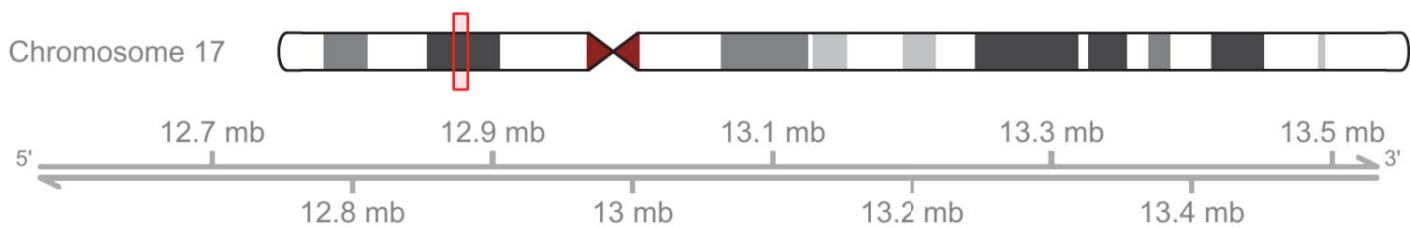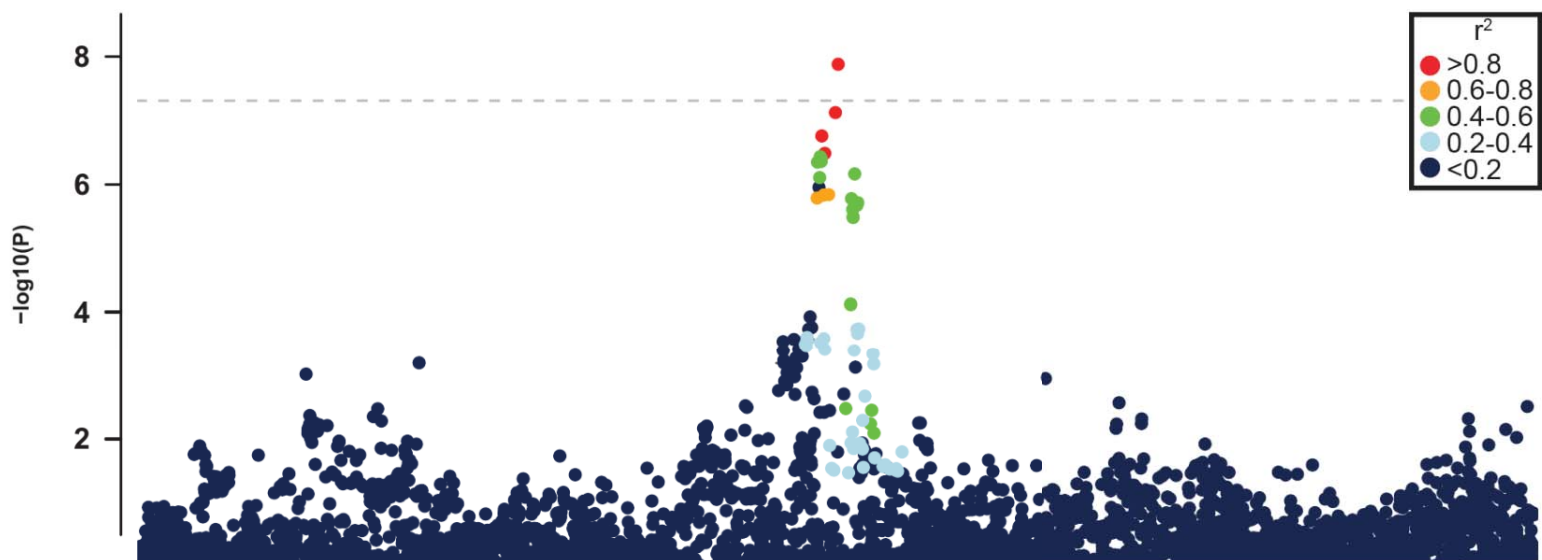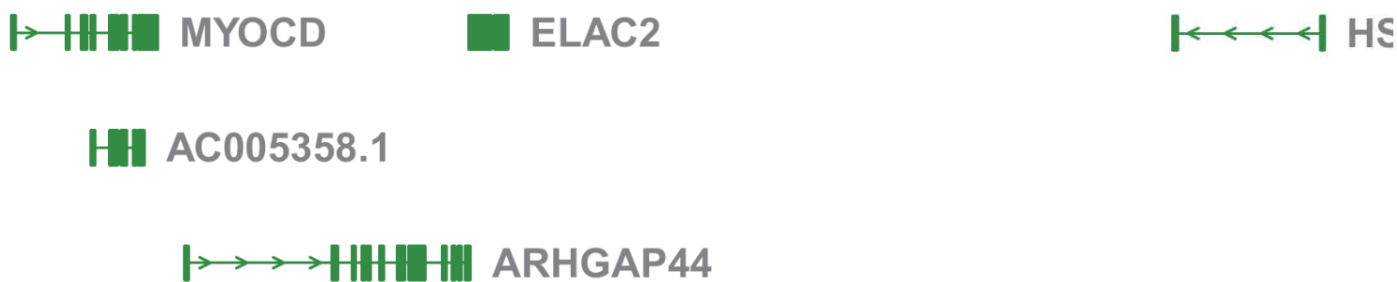

GZ>CP  
CP>GZ

Corrected for total SA

Uncorrected

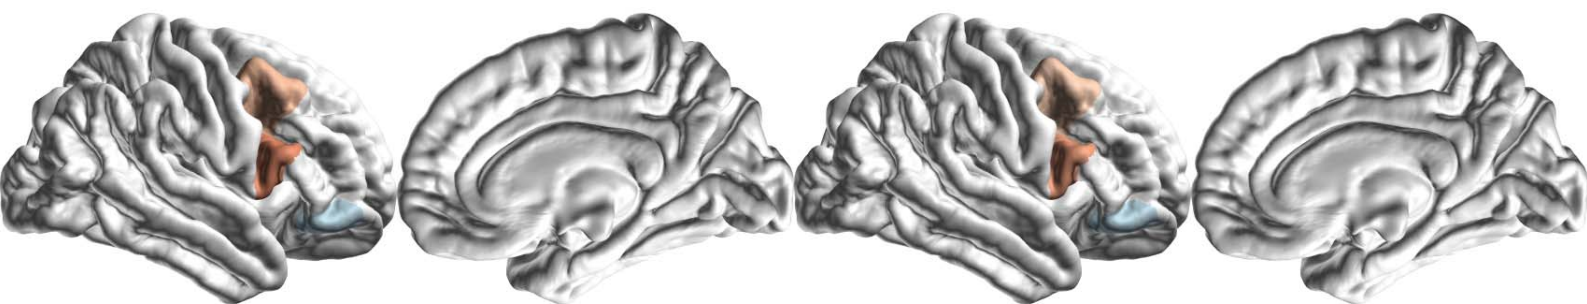

# Pars Opercularis TH: rs7628850

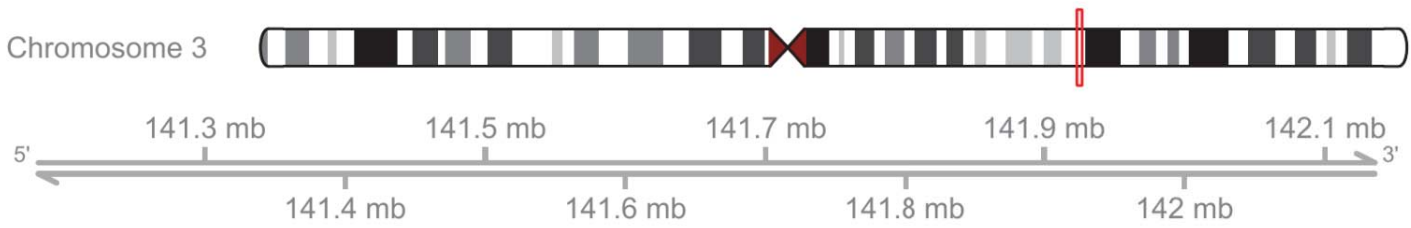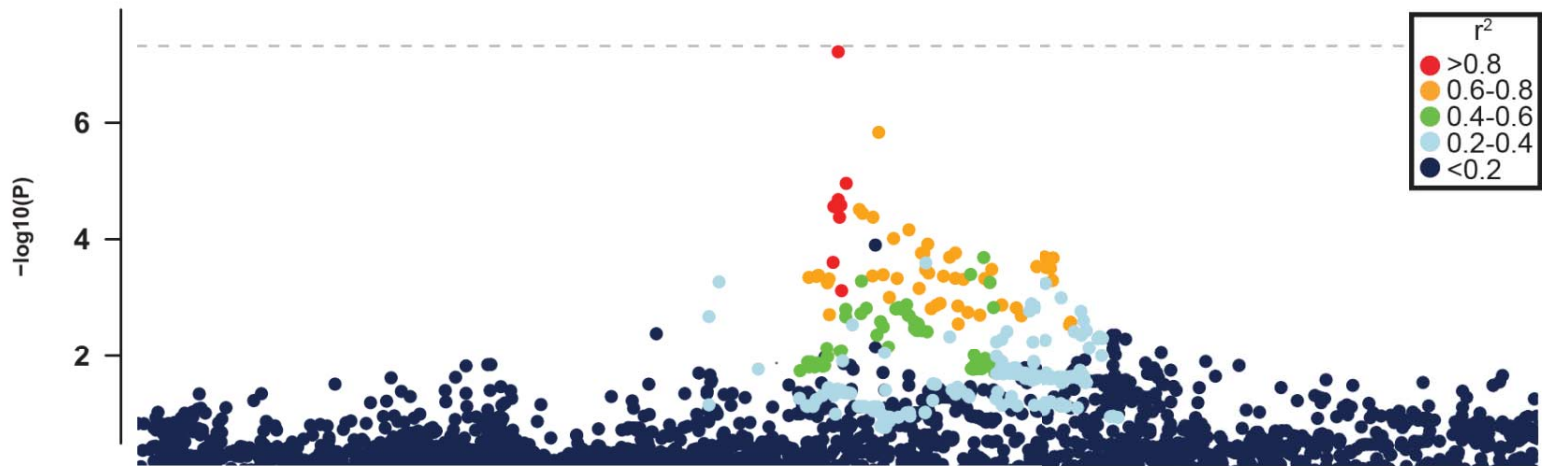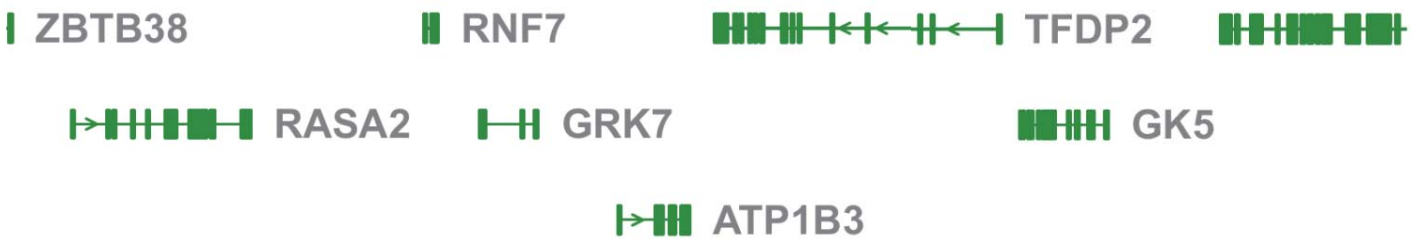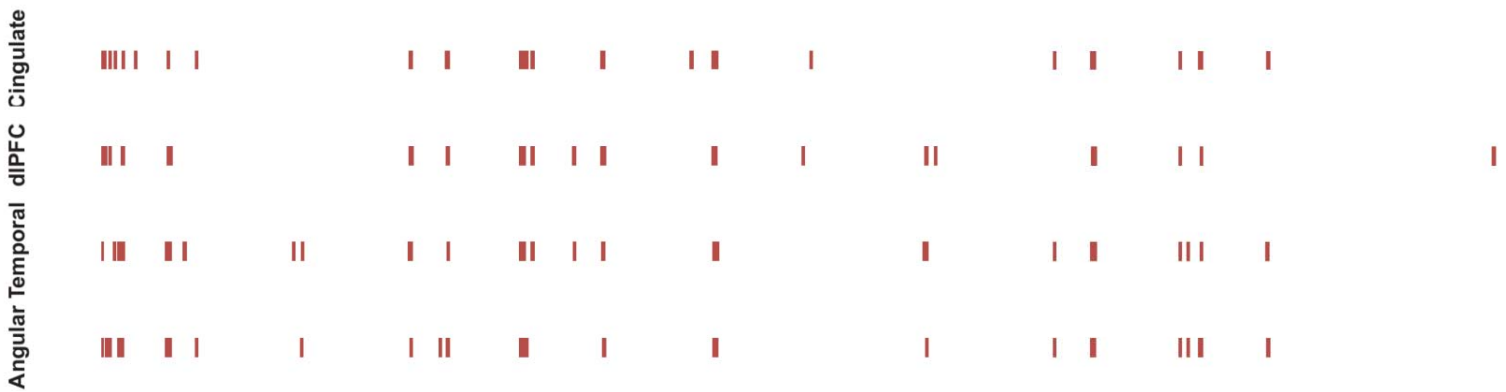

Corrected for average TH

Uncorrected

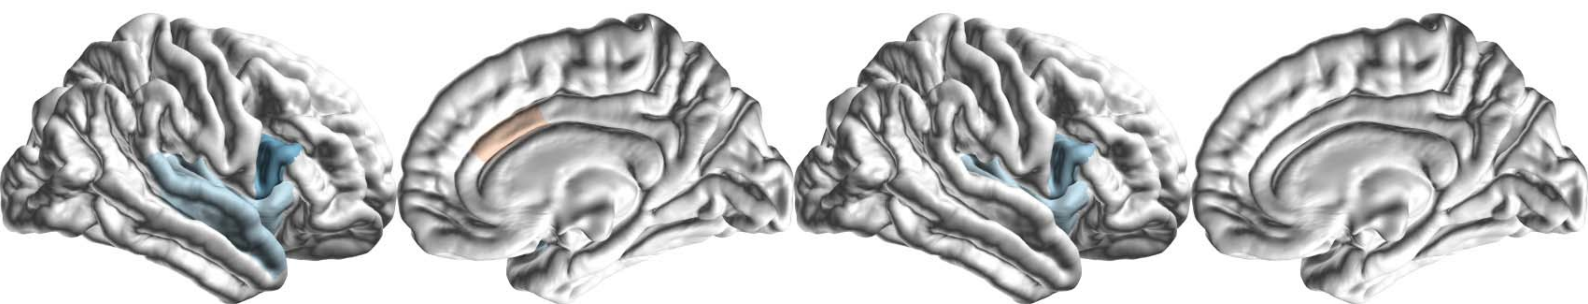



# Caudal Middle Frontal SA: rs7580807

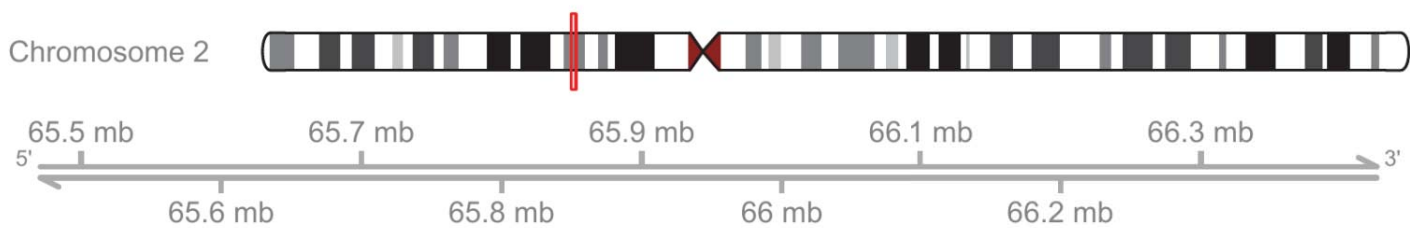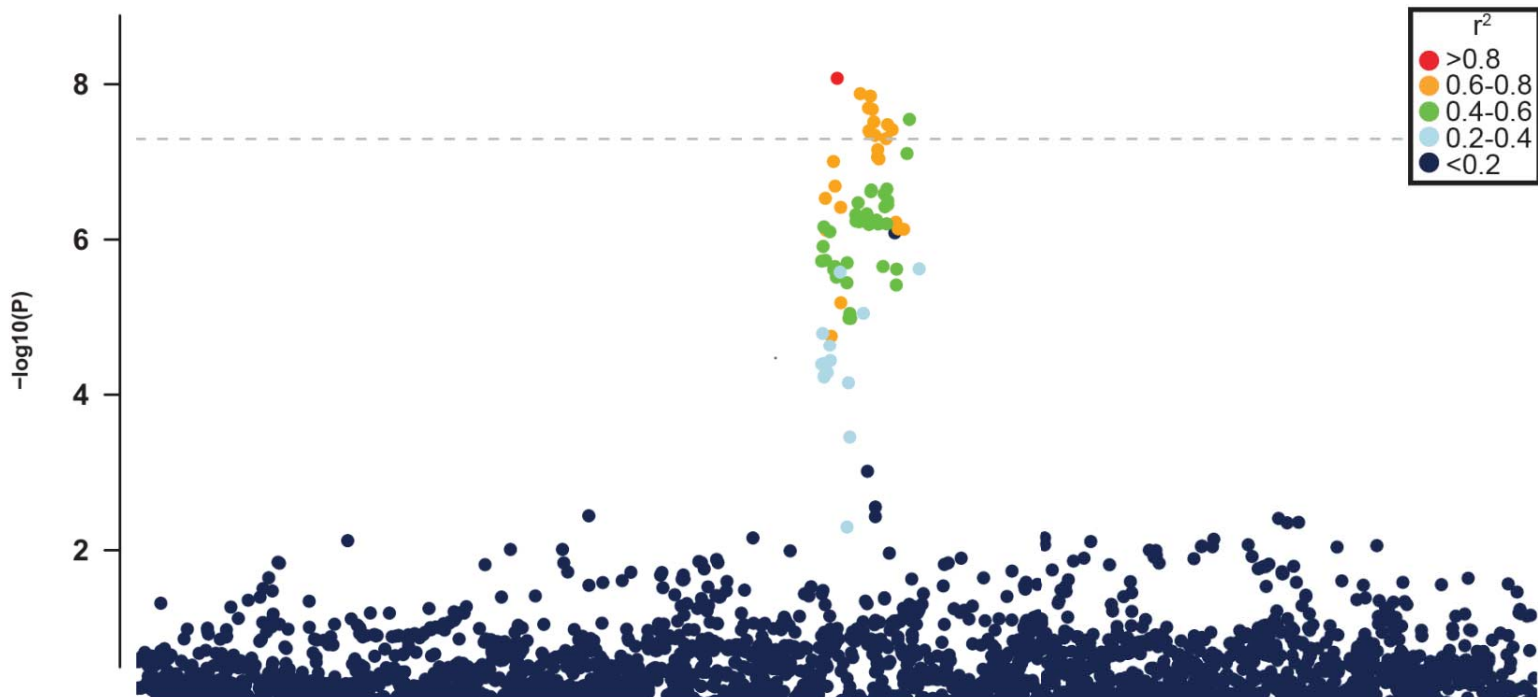

ACTR2 ← SPRED2

GZ>CP

CP>GZ

Corrected for total SA

Uncorrected

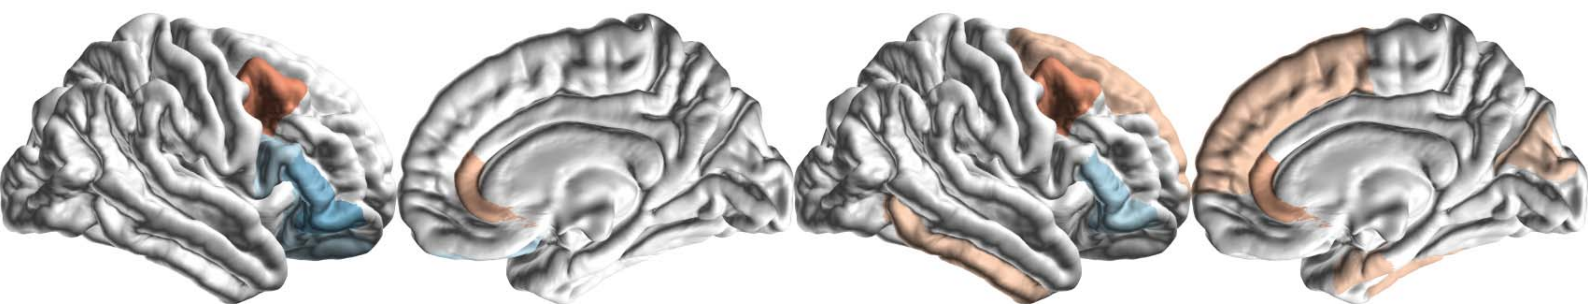

Zscore of the effect allele: A



# Caudal Middle Frontal SA: rs655045

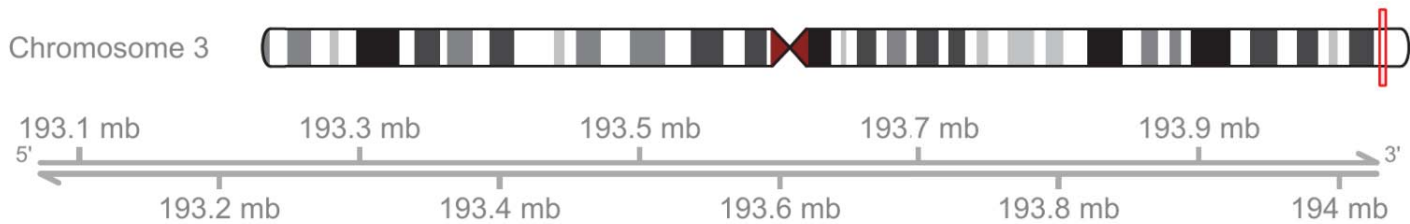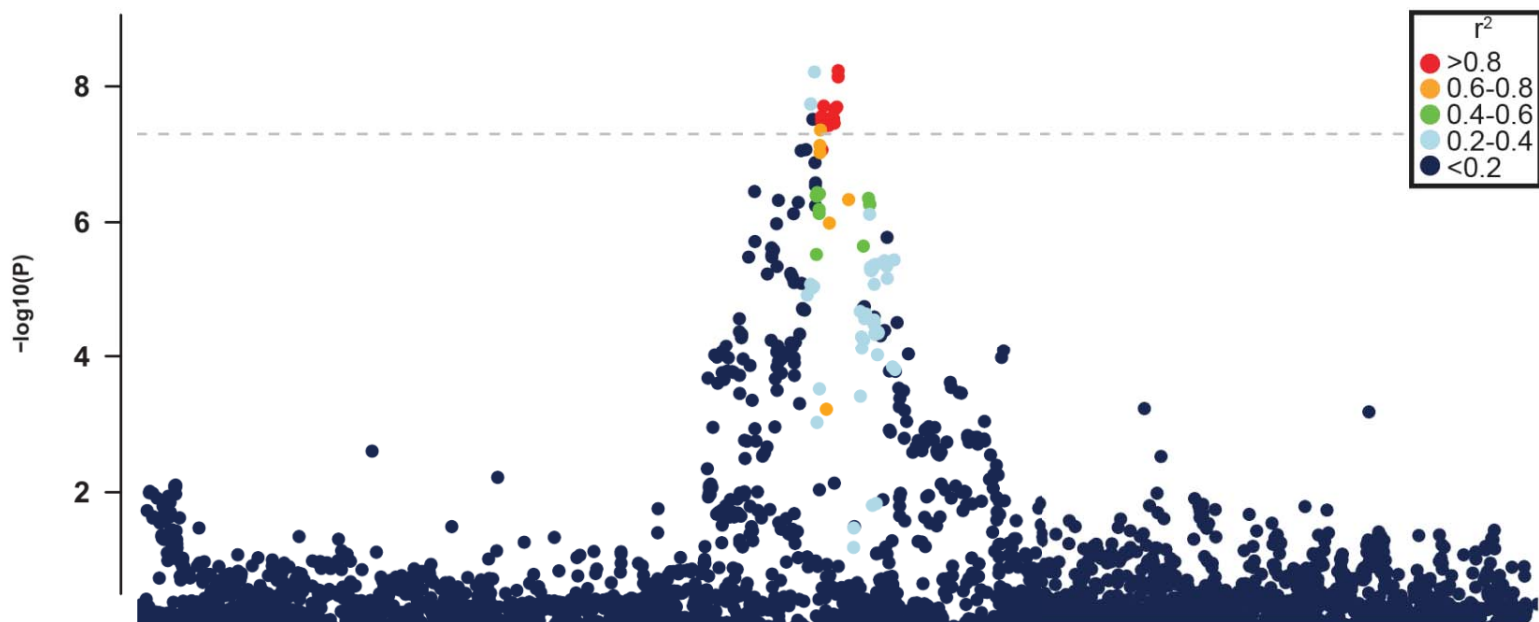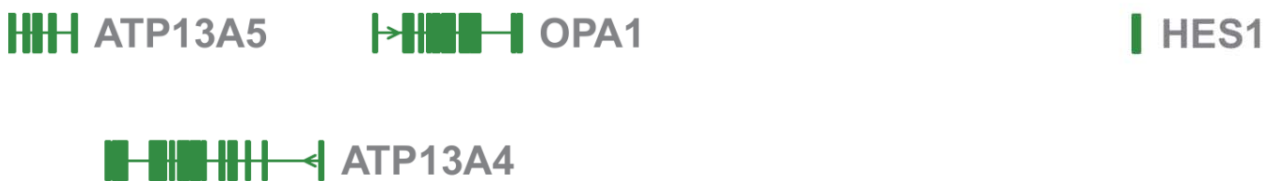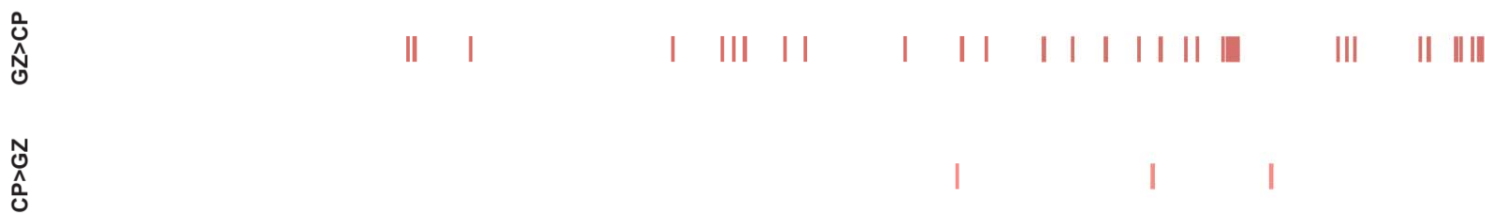

Corrected for total SA

Uncorrected

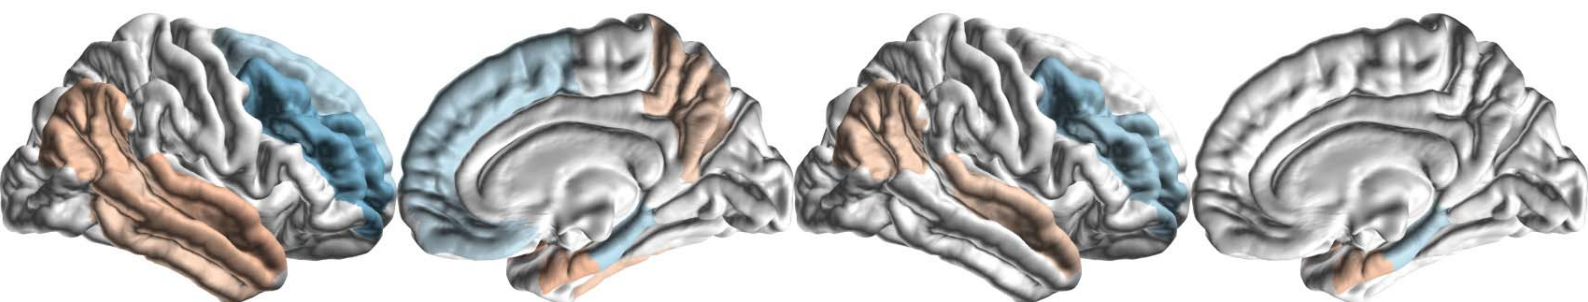

### Caudal Middle Frontal SA: rs30641

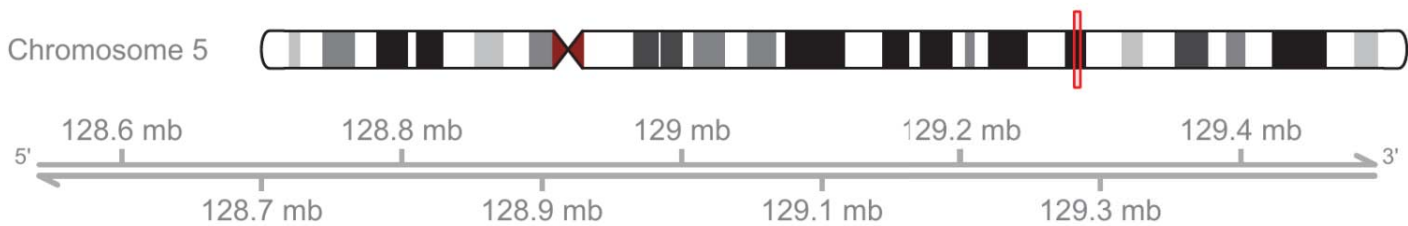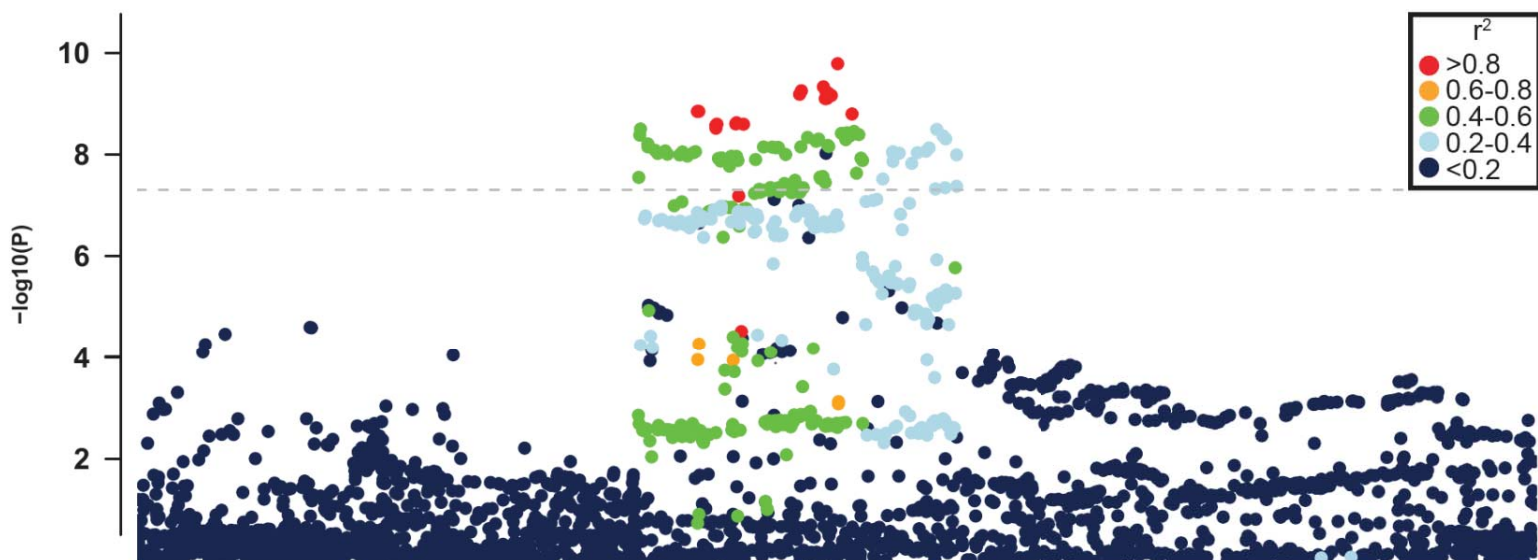

ADAMTS19

KIAA1024L

GZ>CP

CP>GZ

Corrected for total SA

Uncorrected

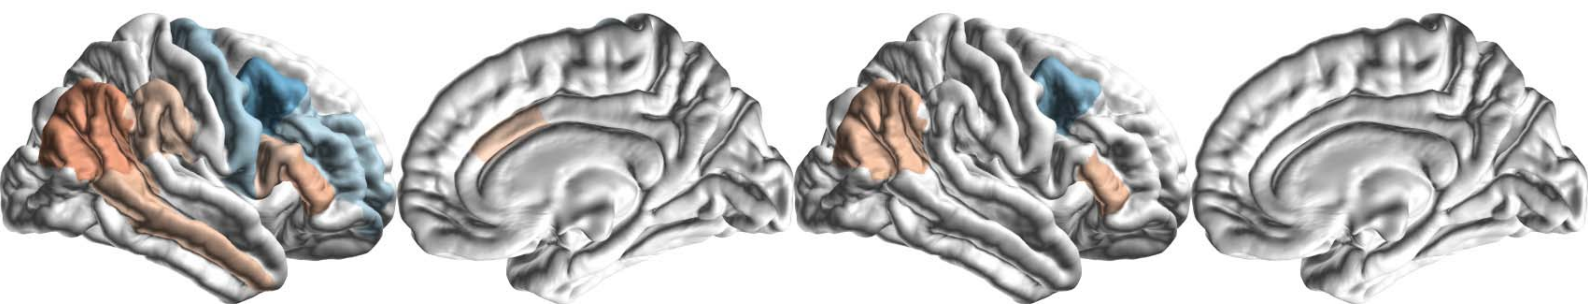

Zscore of the effect allele: A





# Caudal Middle Frontal SA: rs9345125

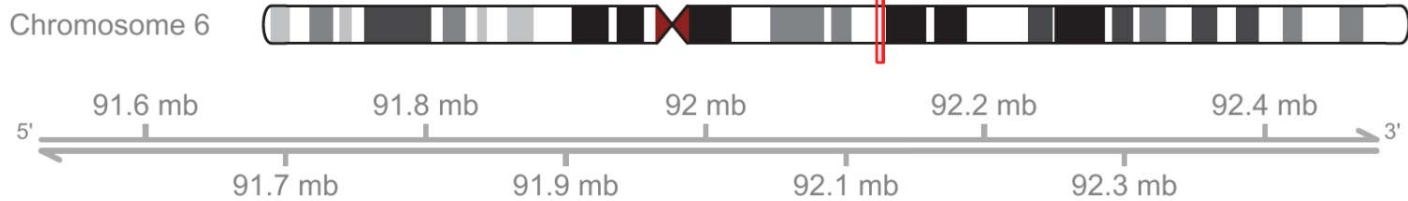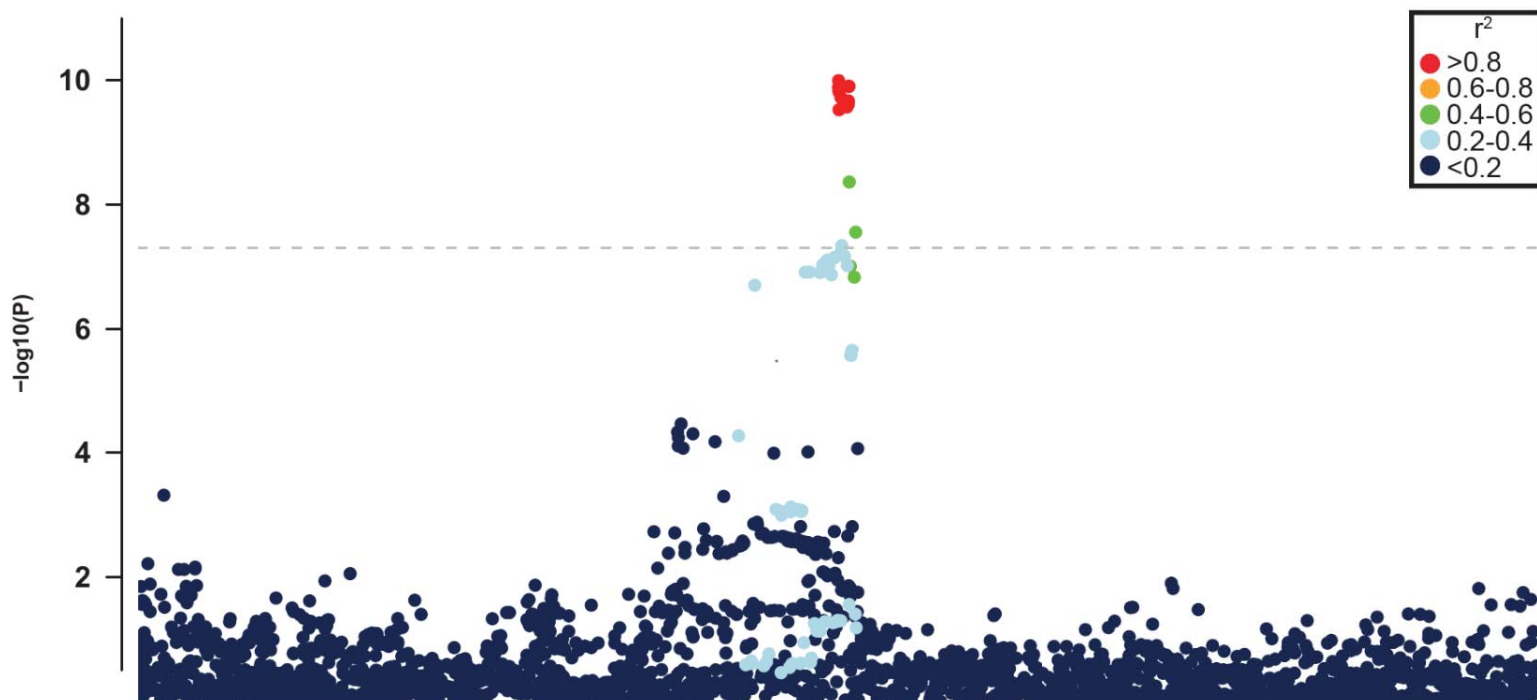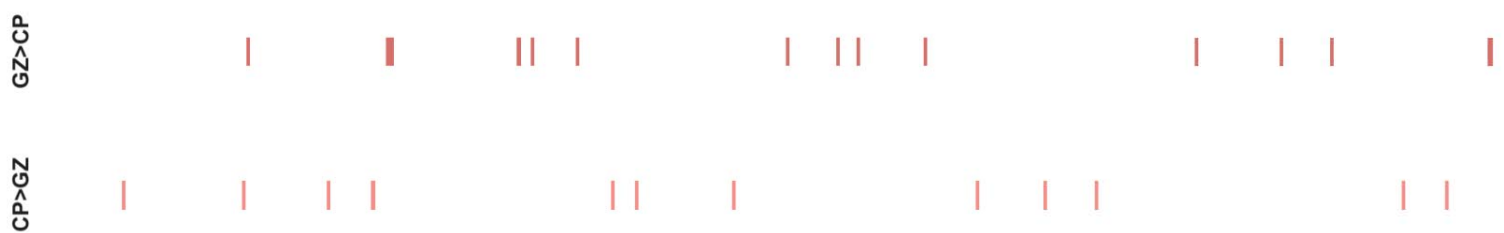

Corrected for total SA

Uncorrected

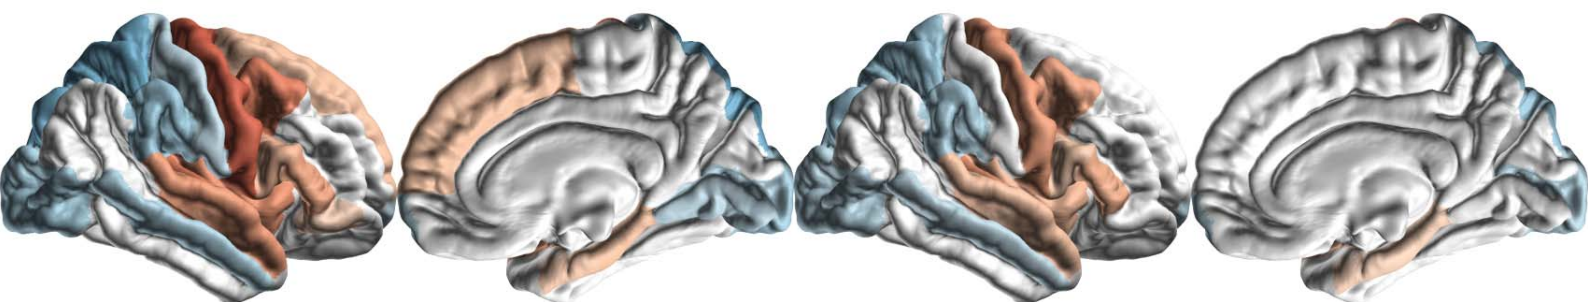

# Caudal Middle Frontal SA: rs4273712

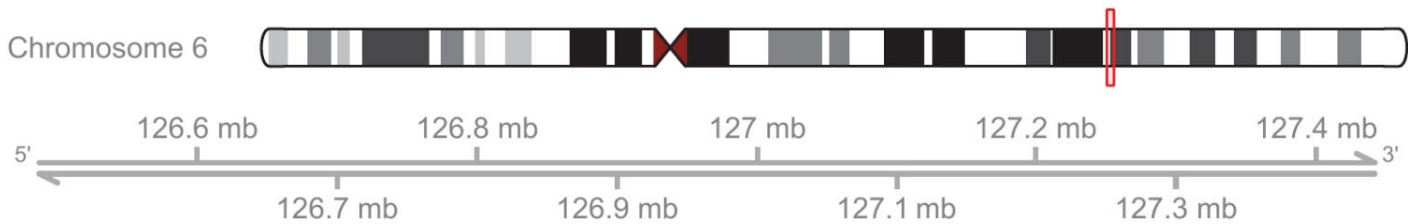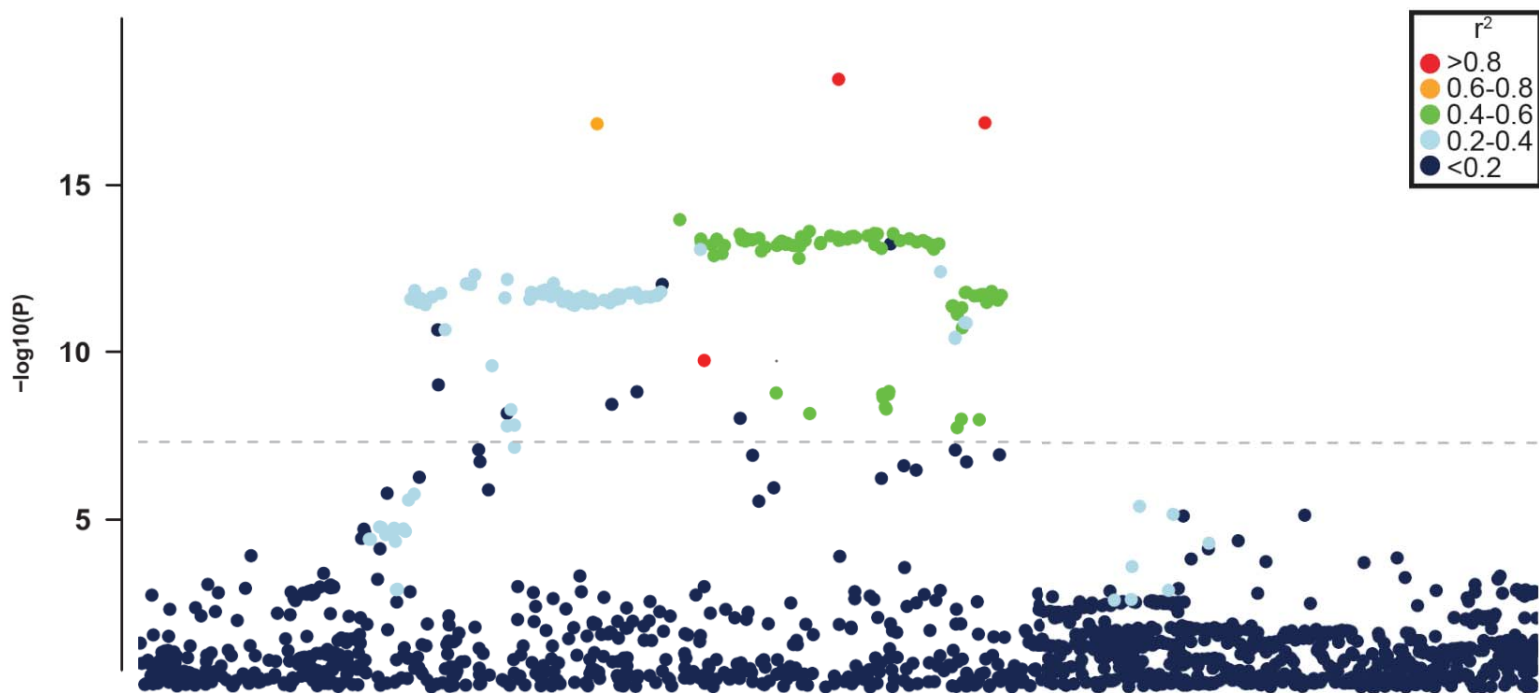

CENPW

GZ>CP

CP>GZ

Corrected for total SA

Uncorrected

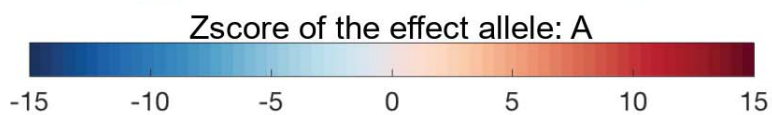

# Caudal Middle Frontal SA: rs7184835

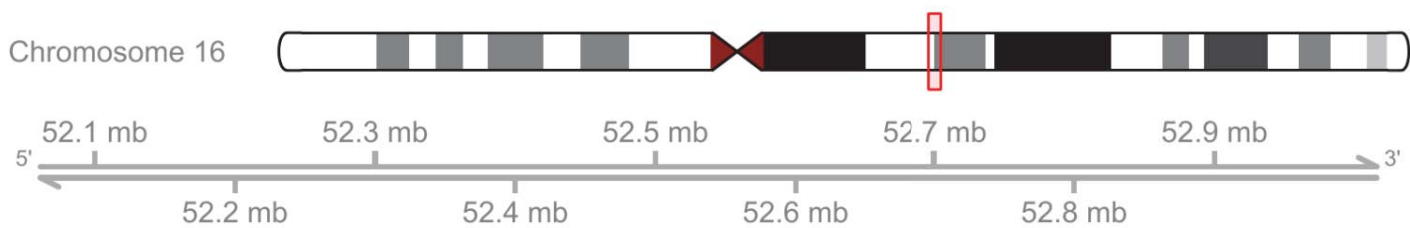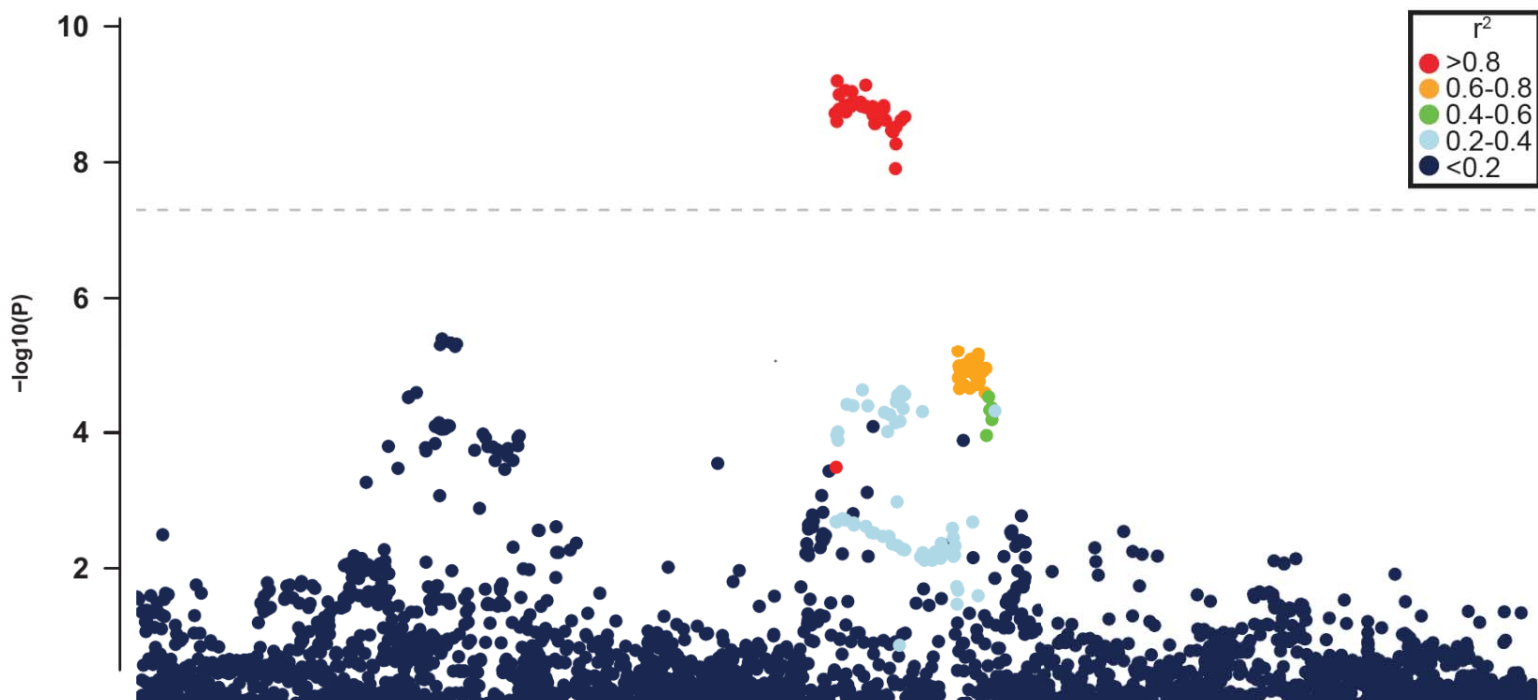

C16orf97

TOX3

GZ>CP

CP>GZ

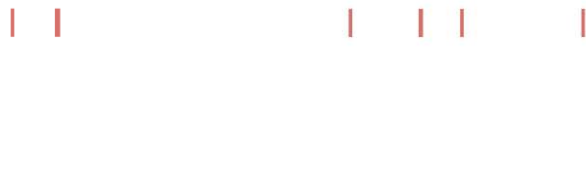

Corrected for total SA

Uncorrected

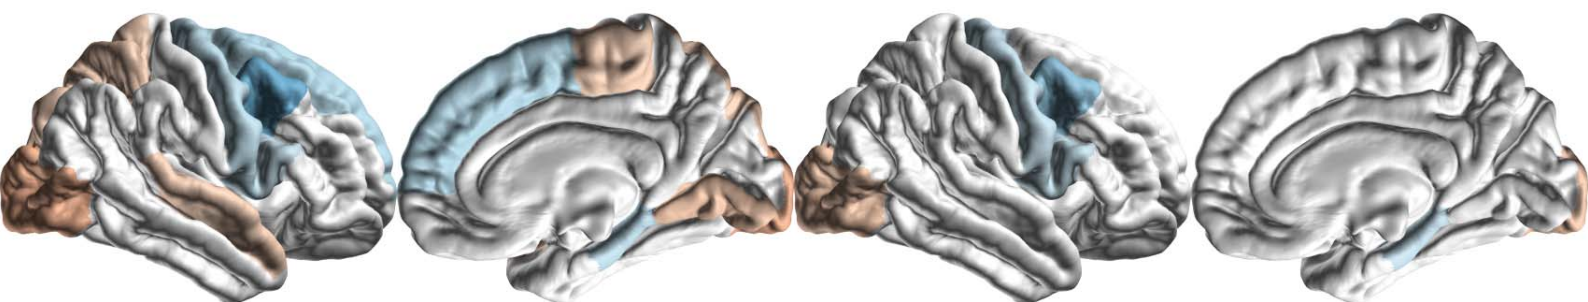

Zscore of the effect allele: T

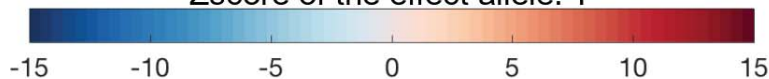



### Caudal Middle Frontal SA: rs1893430

Chromosome 18

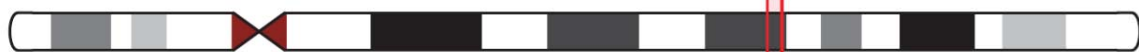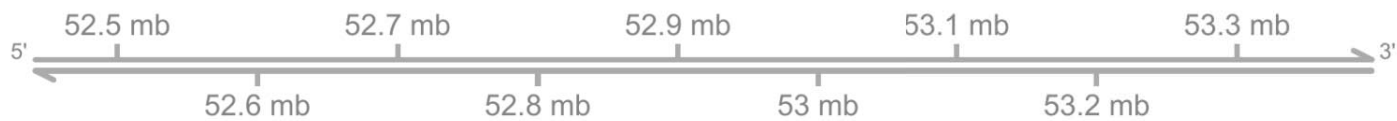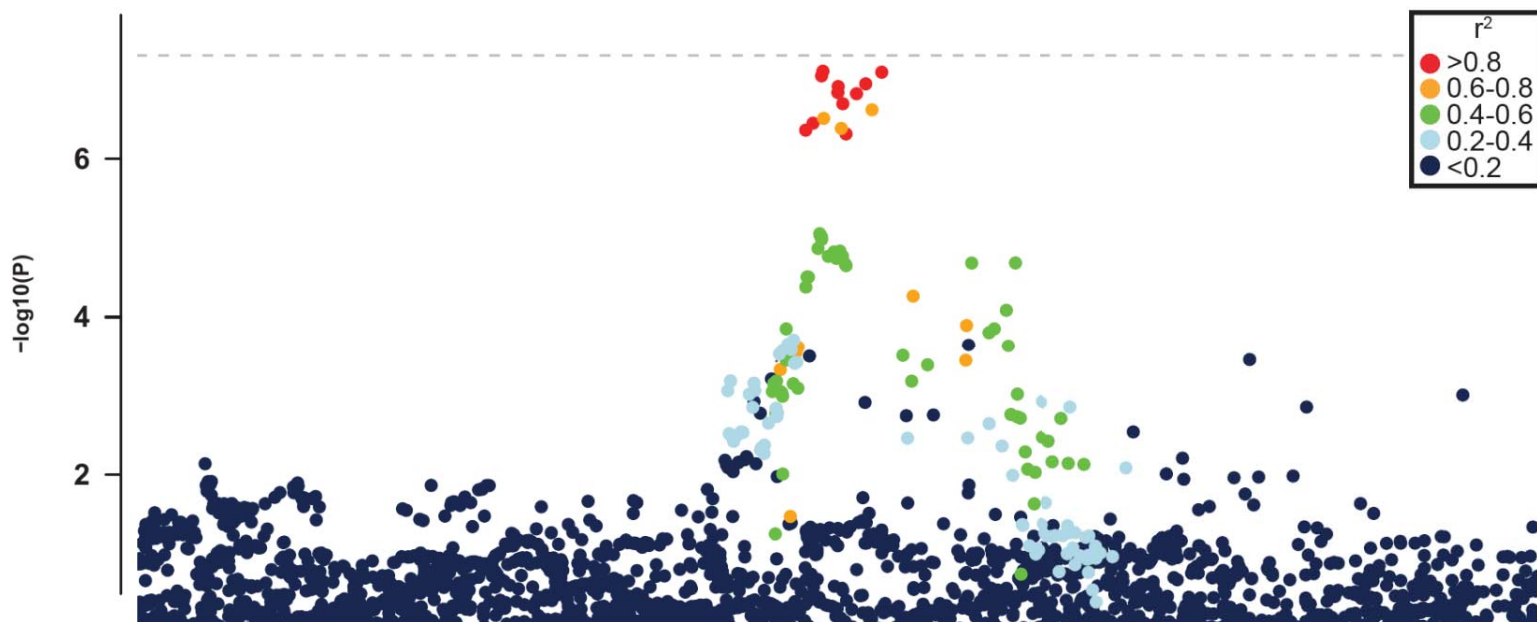

RAB27B

TCF4

CCDC68

GZ>CP

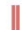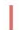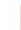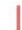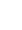

CP>GZ

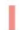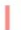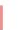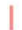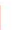

Corrected for total SA

Uncorrected

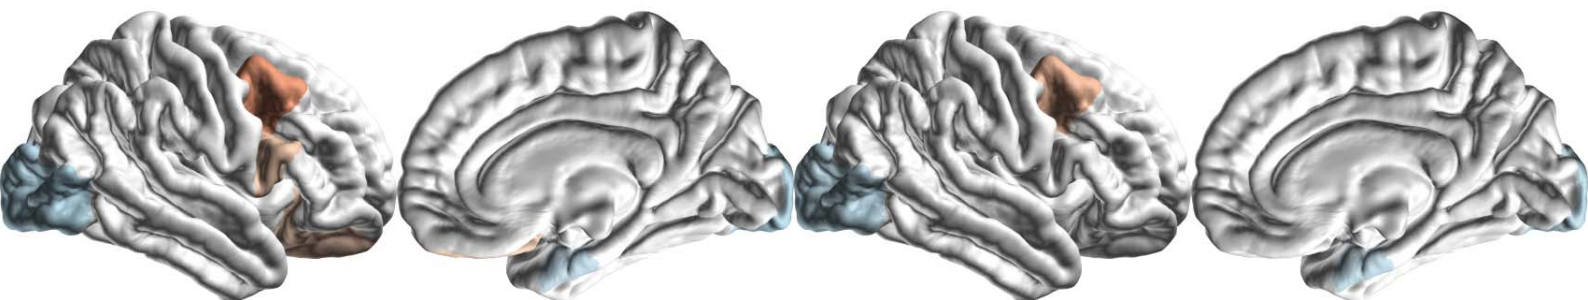

Zscore of the effect allele: A

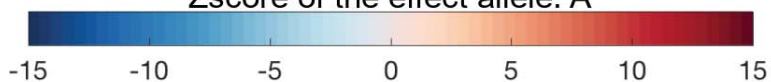

# Caudal Middle Frontal TH: rs62385486

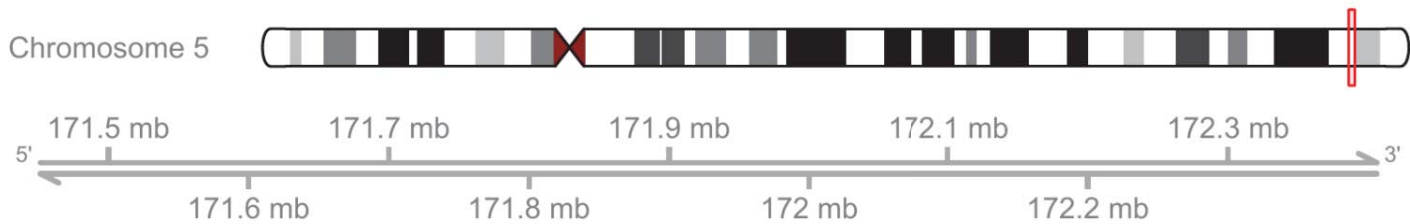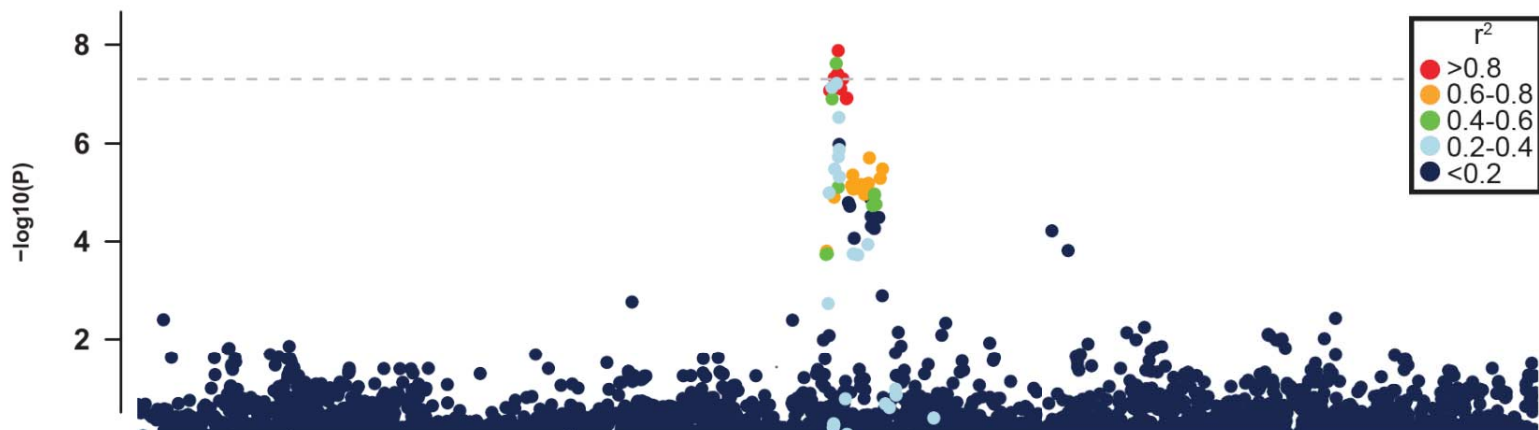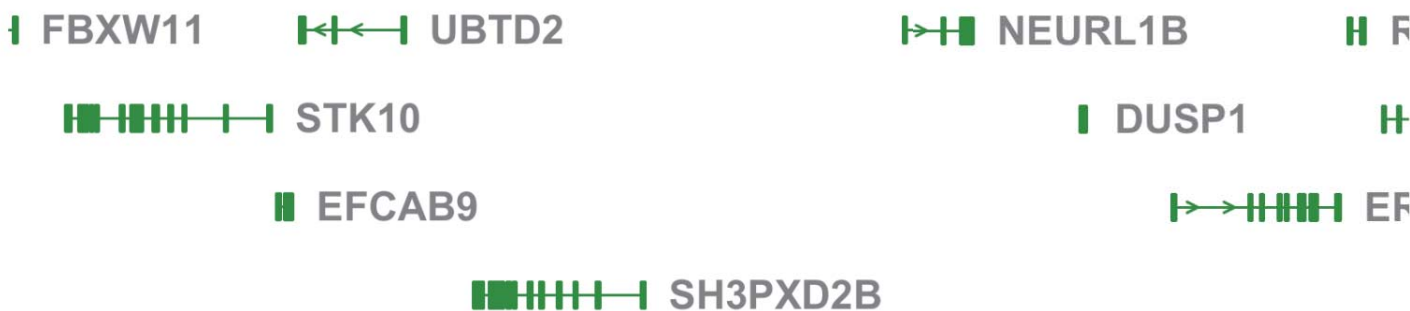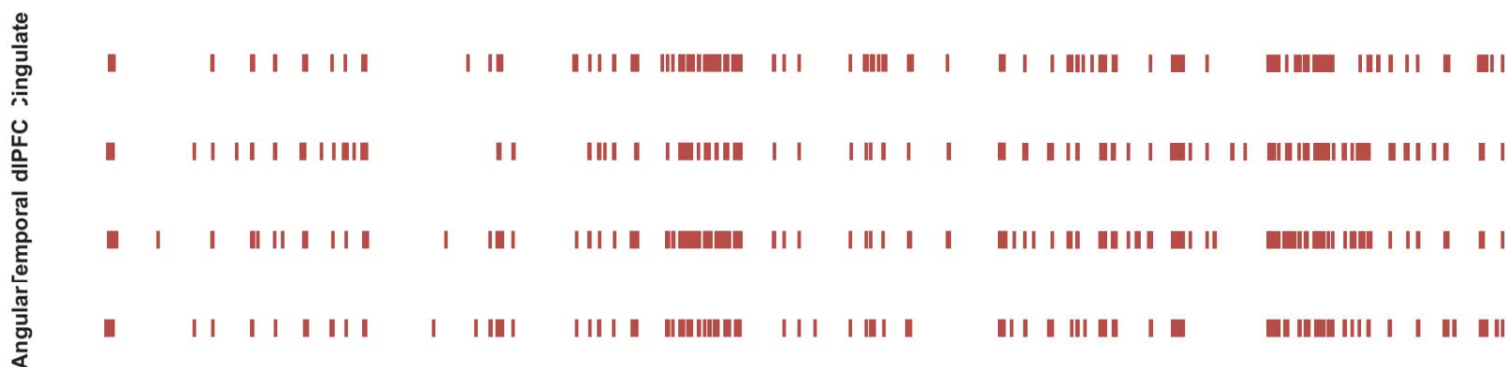

Corrected for average TH

Uncorrected

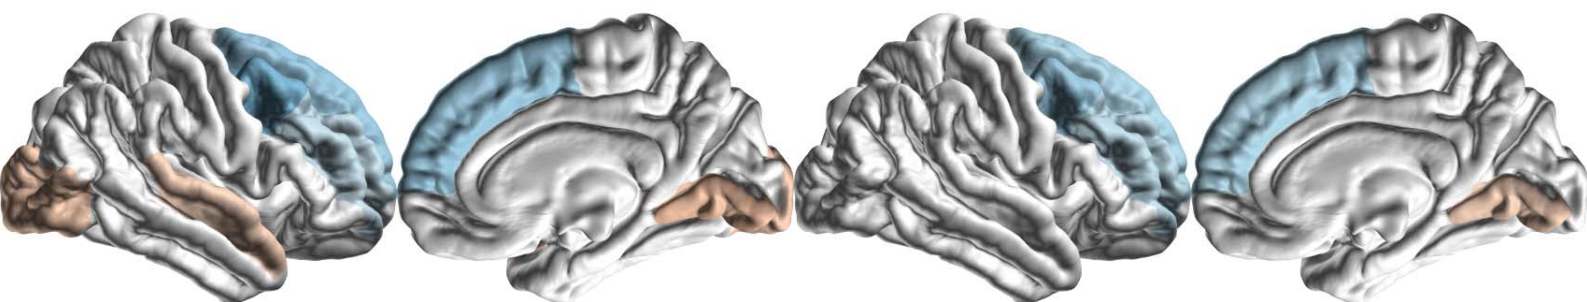

# Paracentral SA: rs2269084

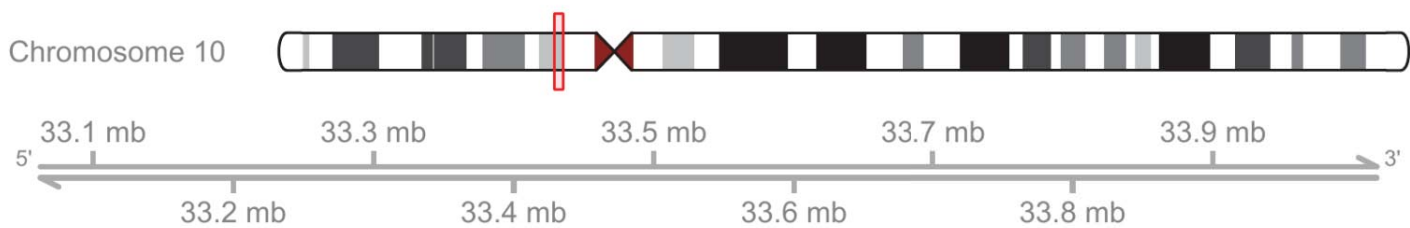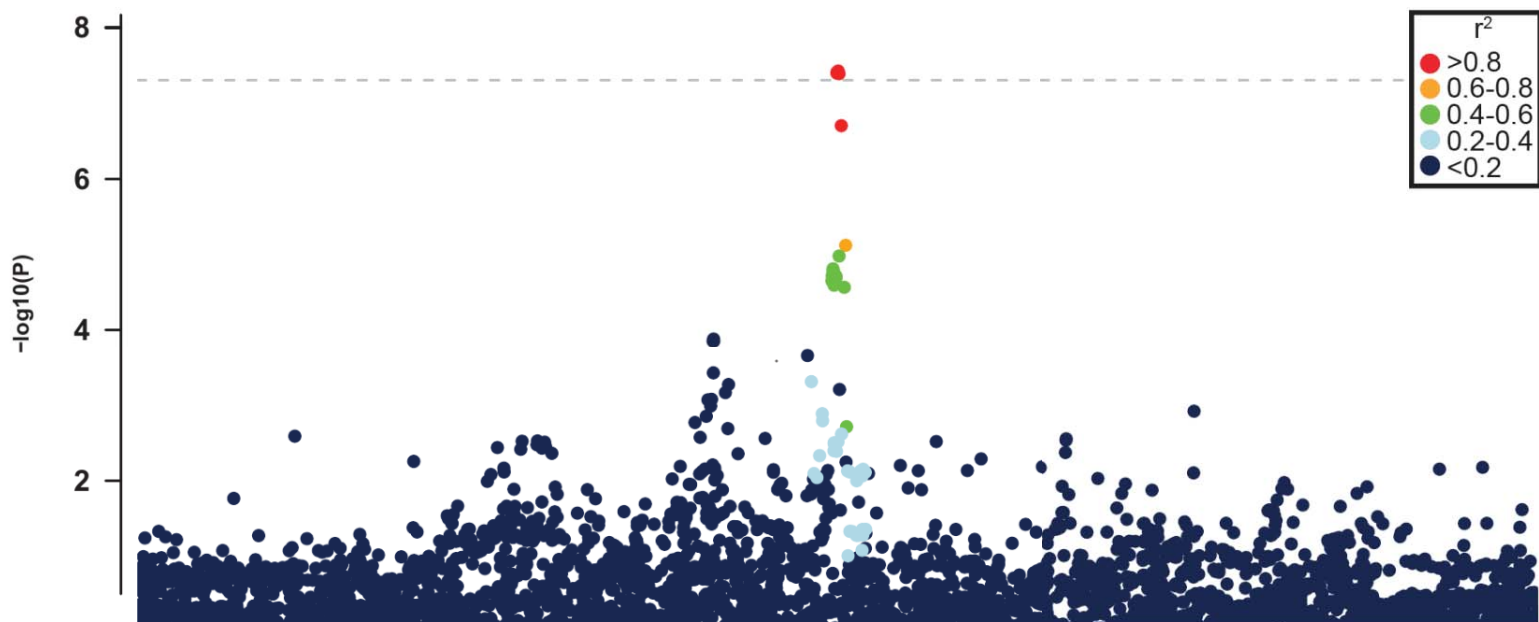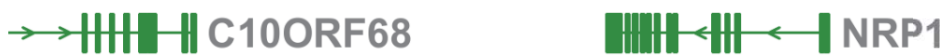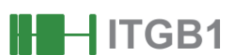

GZ>CP

CP>GZ

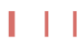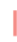

Corrected for total SA

Uncorrected

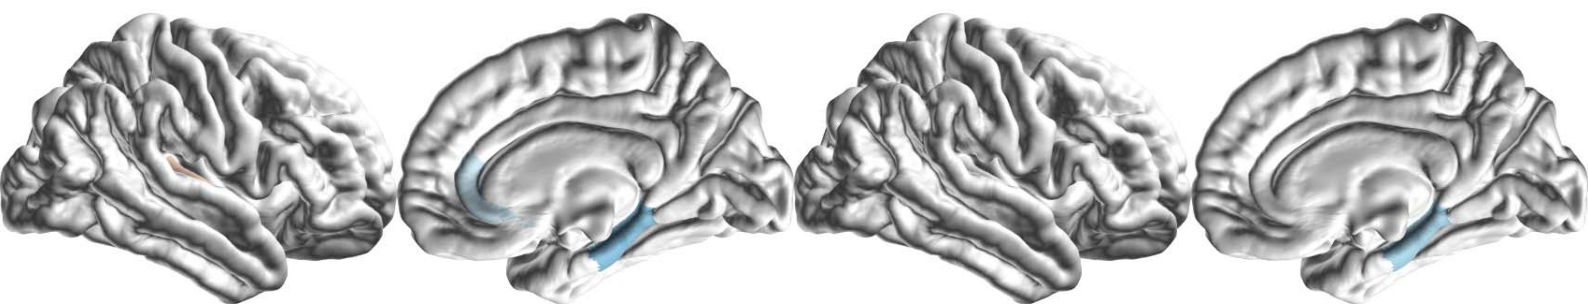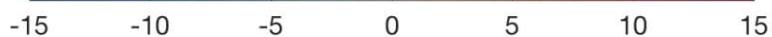



# Paracentral SA: rs7303526

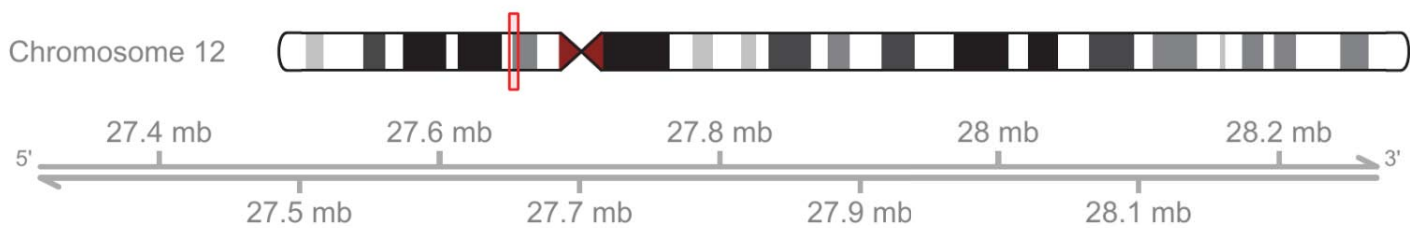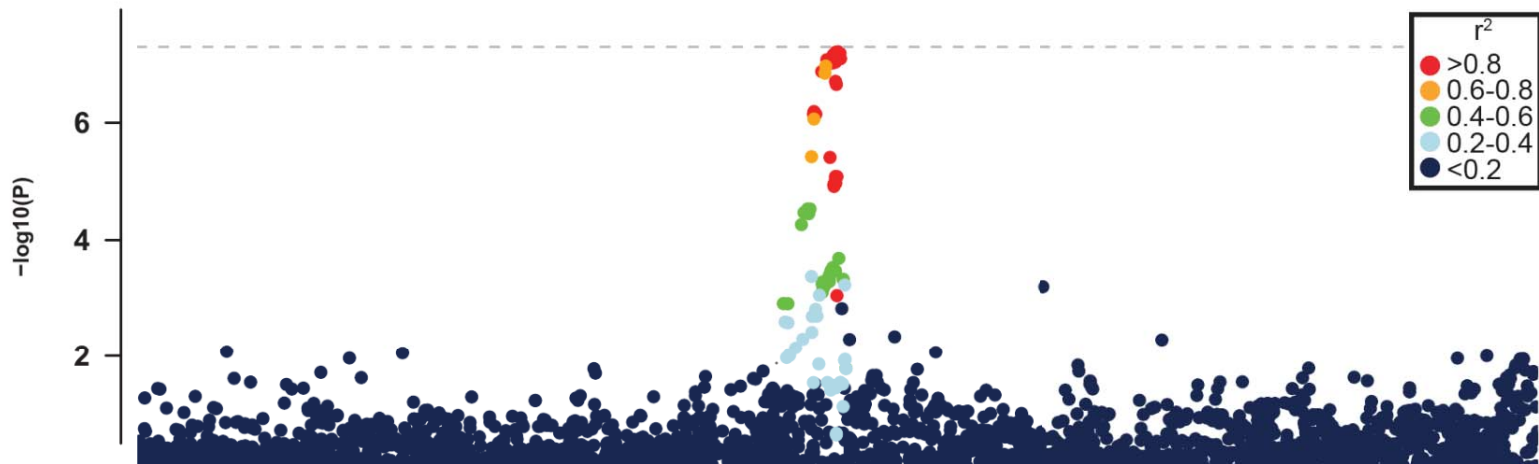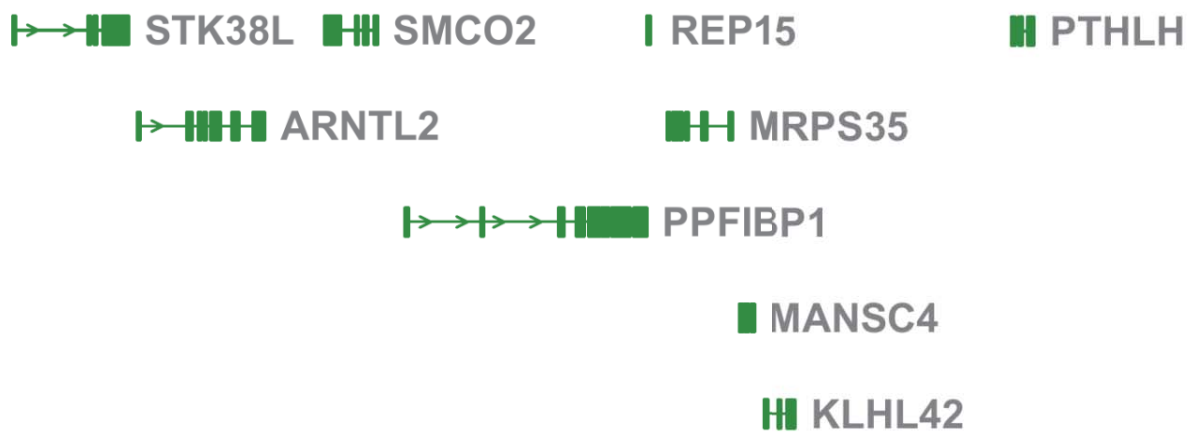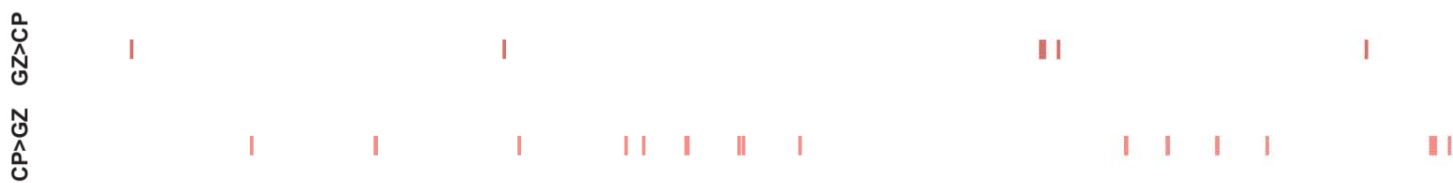

Corrected for total SA

Uncorrected

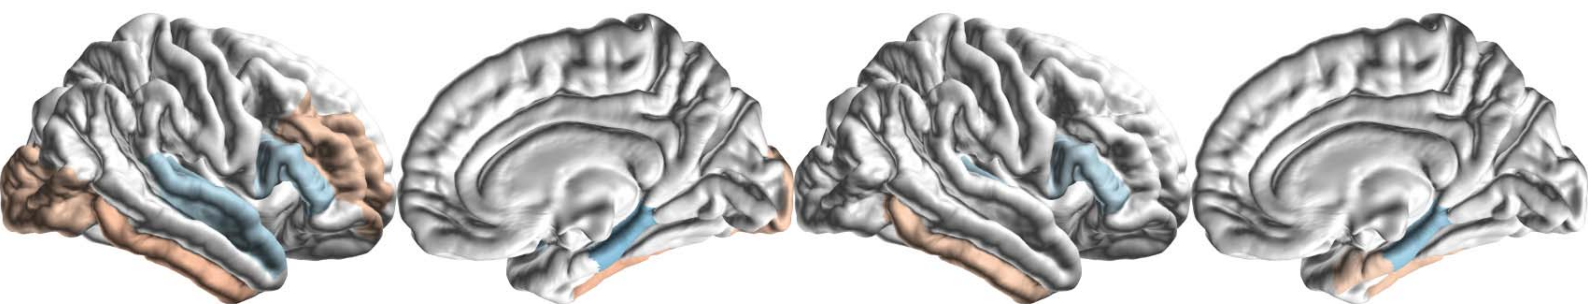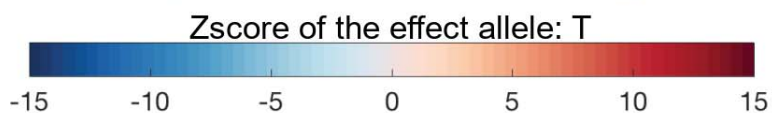

### Paracentral SA: rs12146713

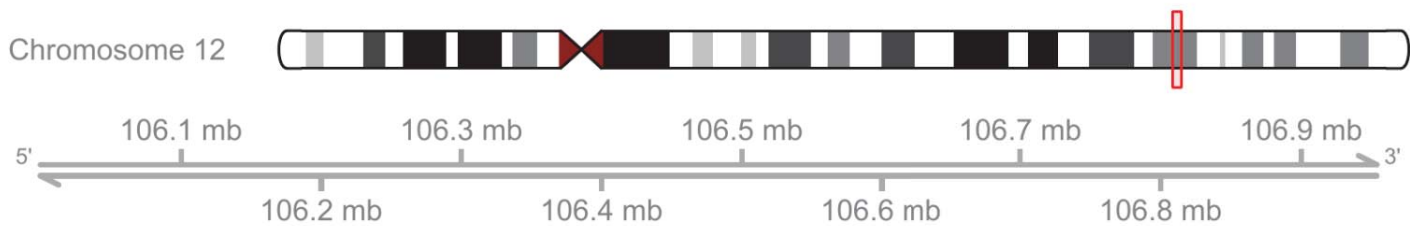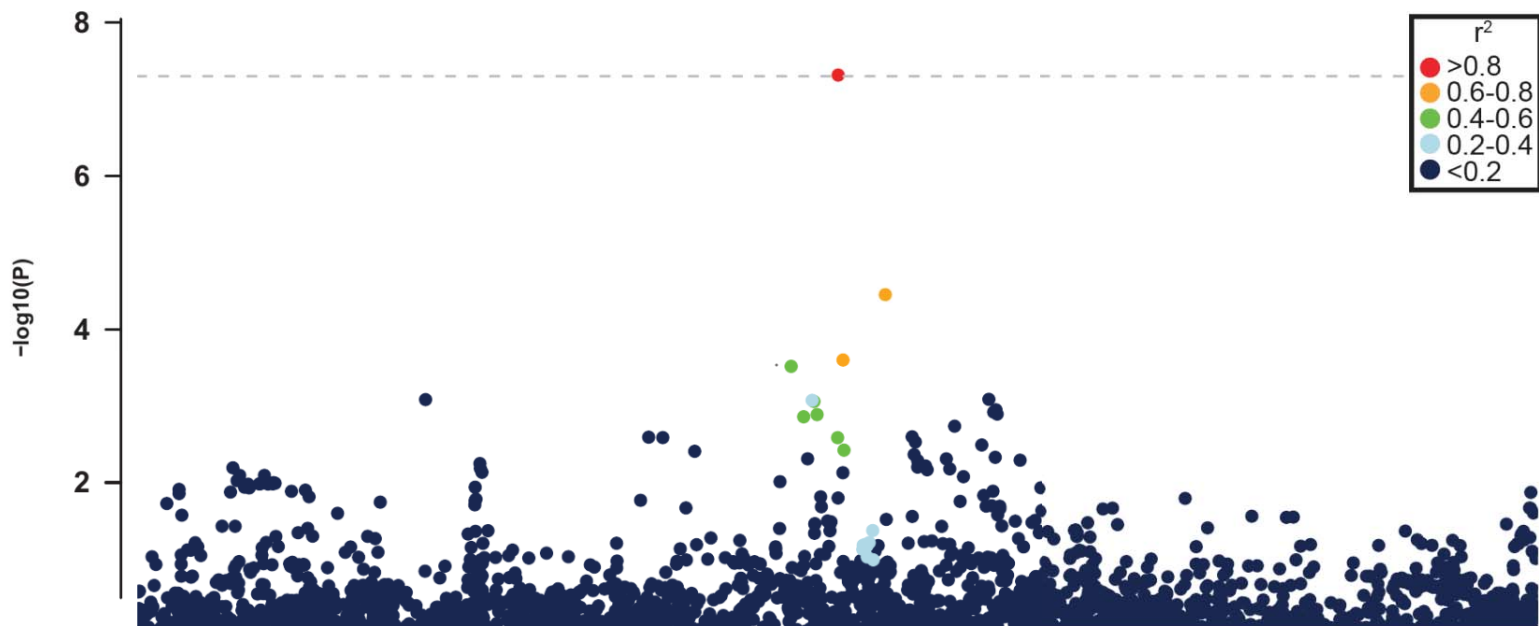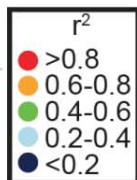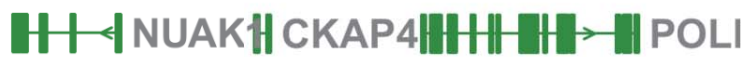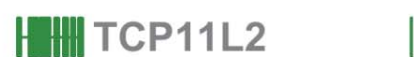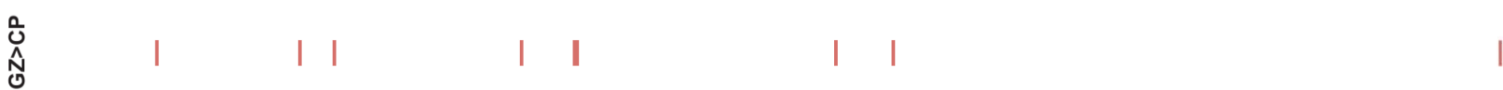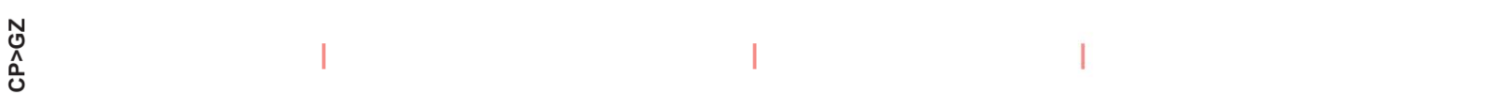

Corrected for total SA

Uncorrected

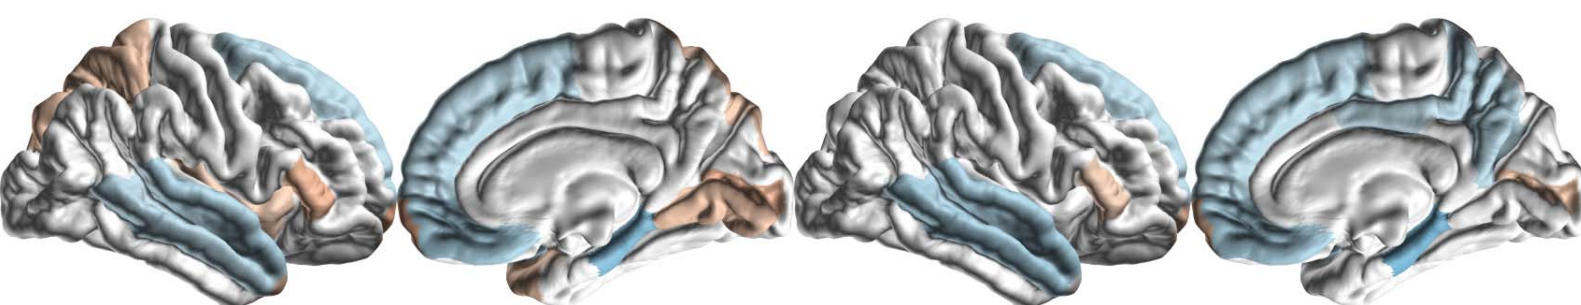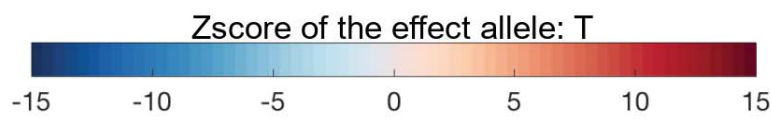

# Precentral SA: rs10064431

Chromosome 5

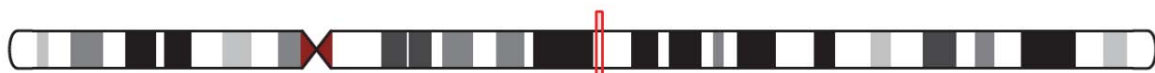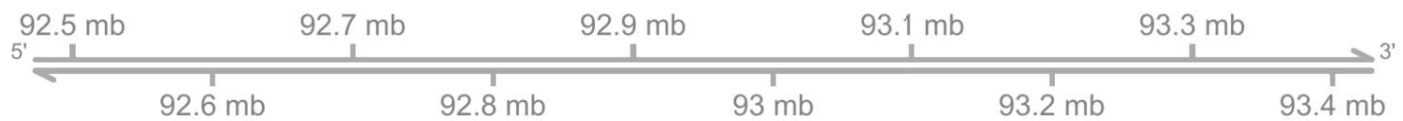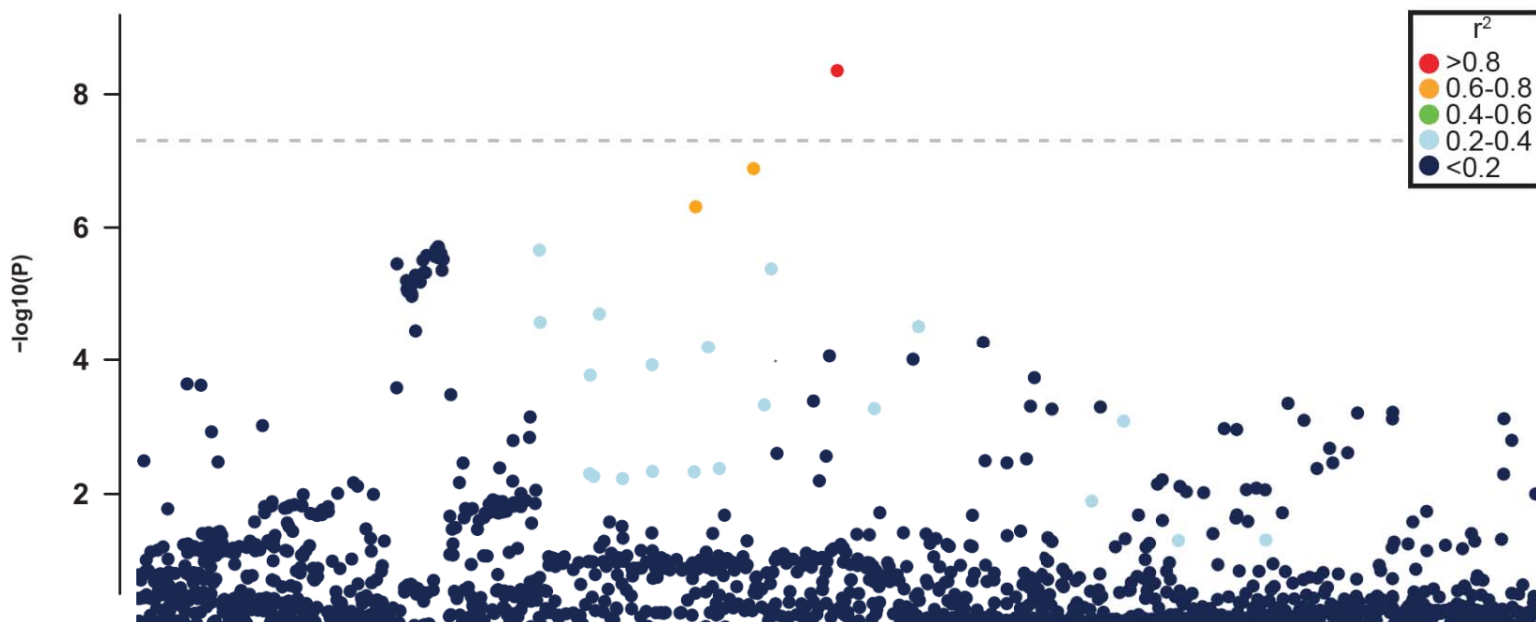

NR2F1 POU5F2

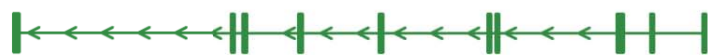

GZ>CP

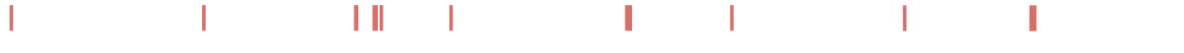

CP>GZ

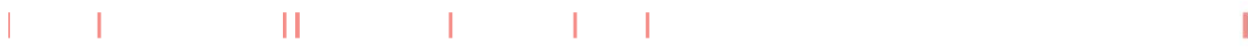

Corrected for total SA

Uncorrected

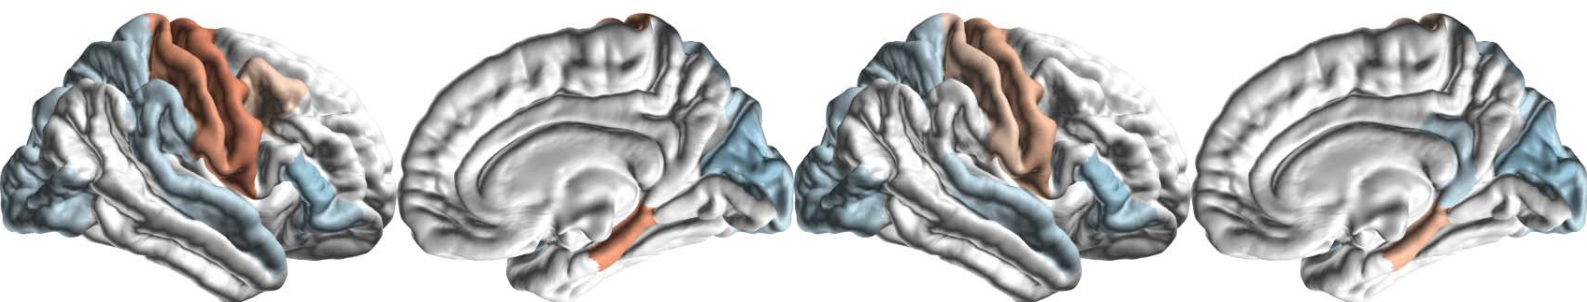

Zscore of the effect allele: T

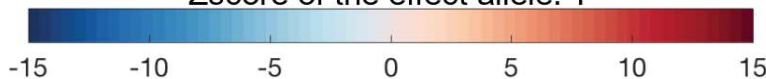



# Precentral SA: rs4706392

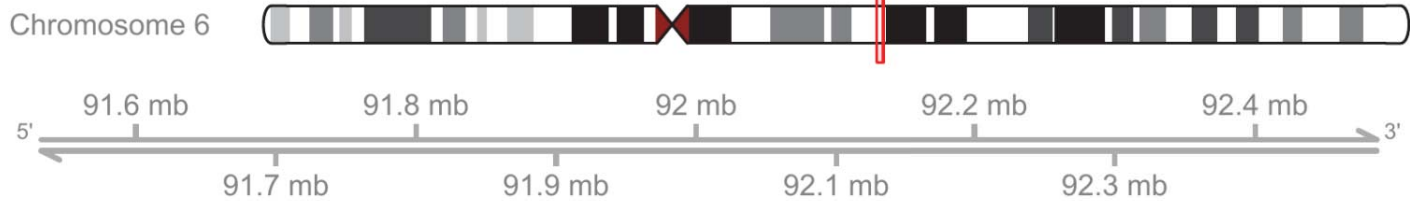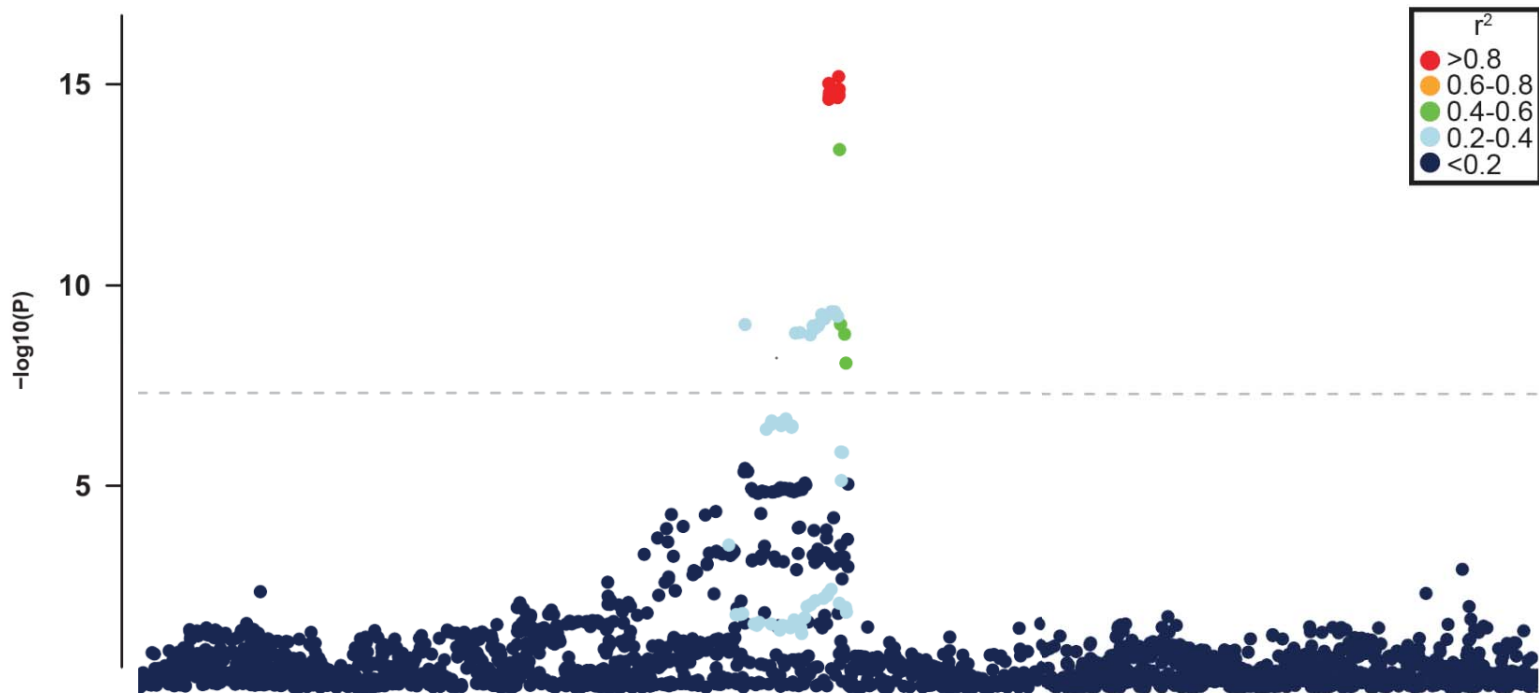

GZ>CP

CP>GZ

Corrected for total SA

Uncorrected

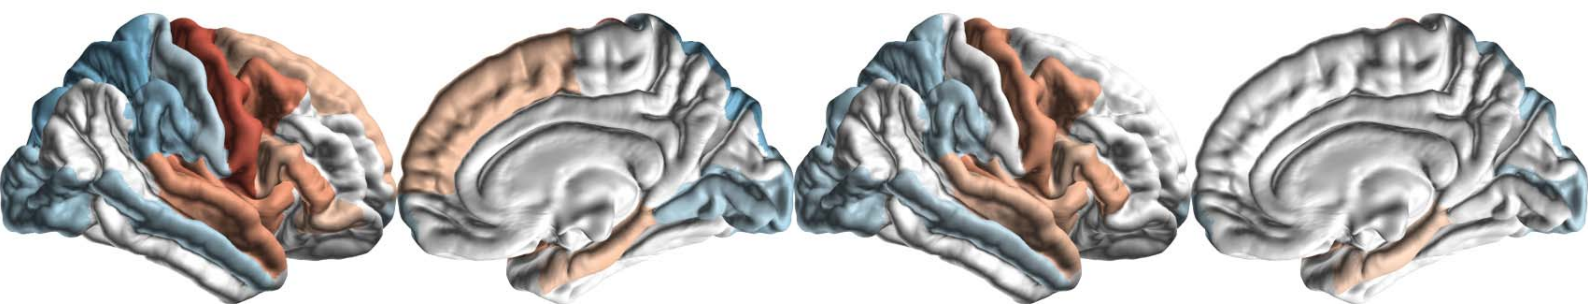

-15 -10 -5 0 5 10 15

### Precentral SA: rs11197866

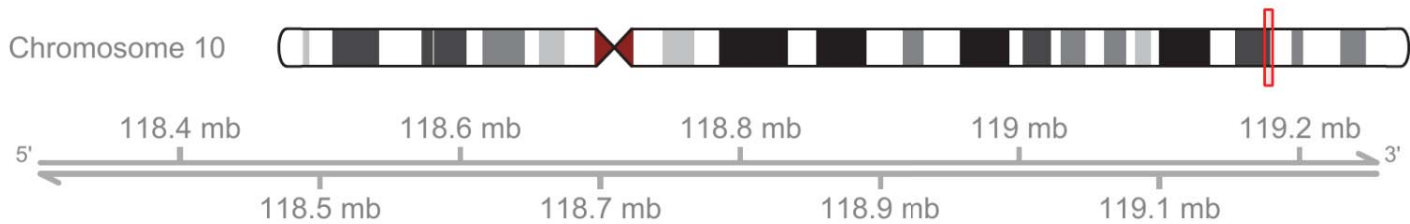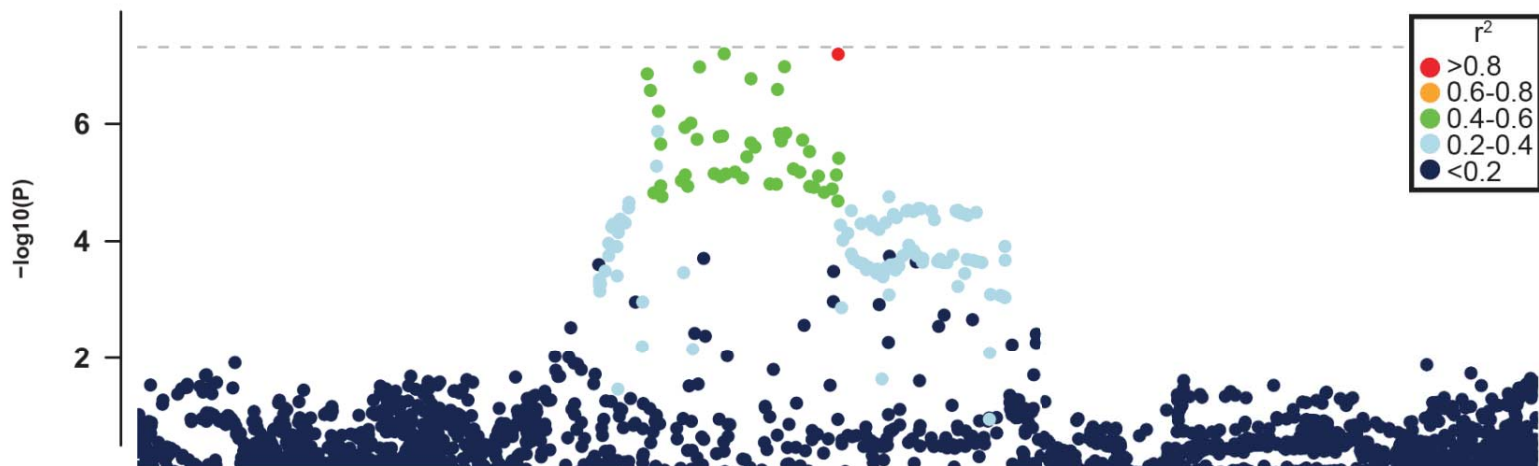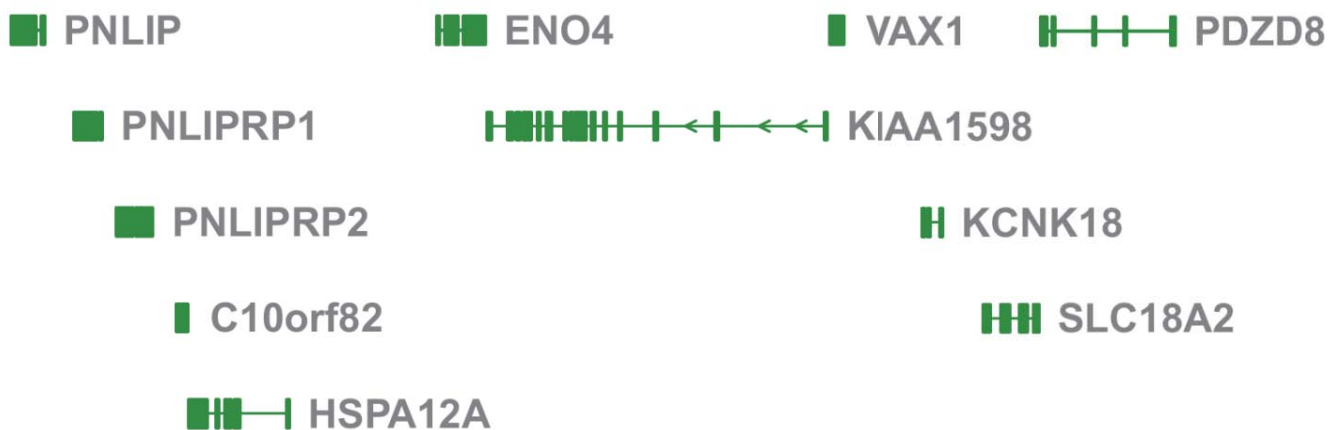

CP>GZ GZ>CP

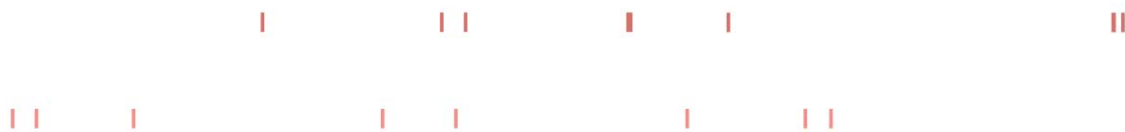

Corrected for total SA

Uncorrected

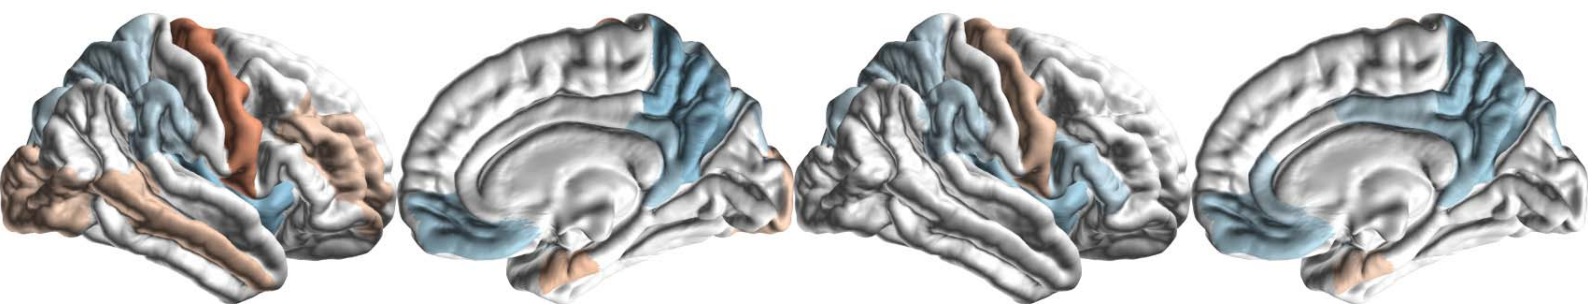

# Precentral SA: rs17601140

Chromosome 15

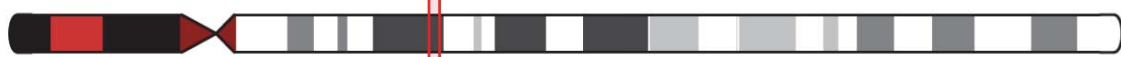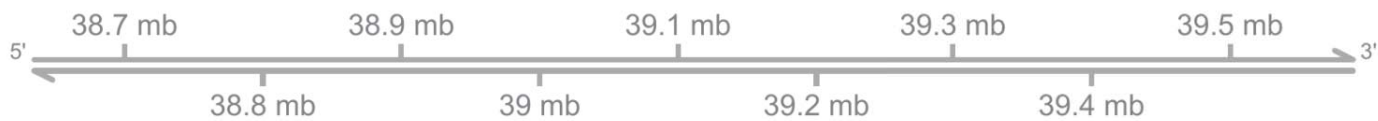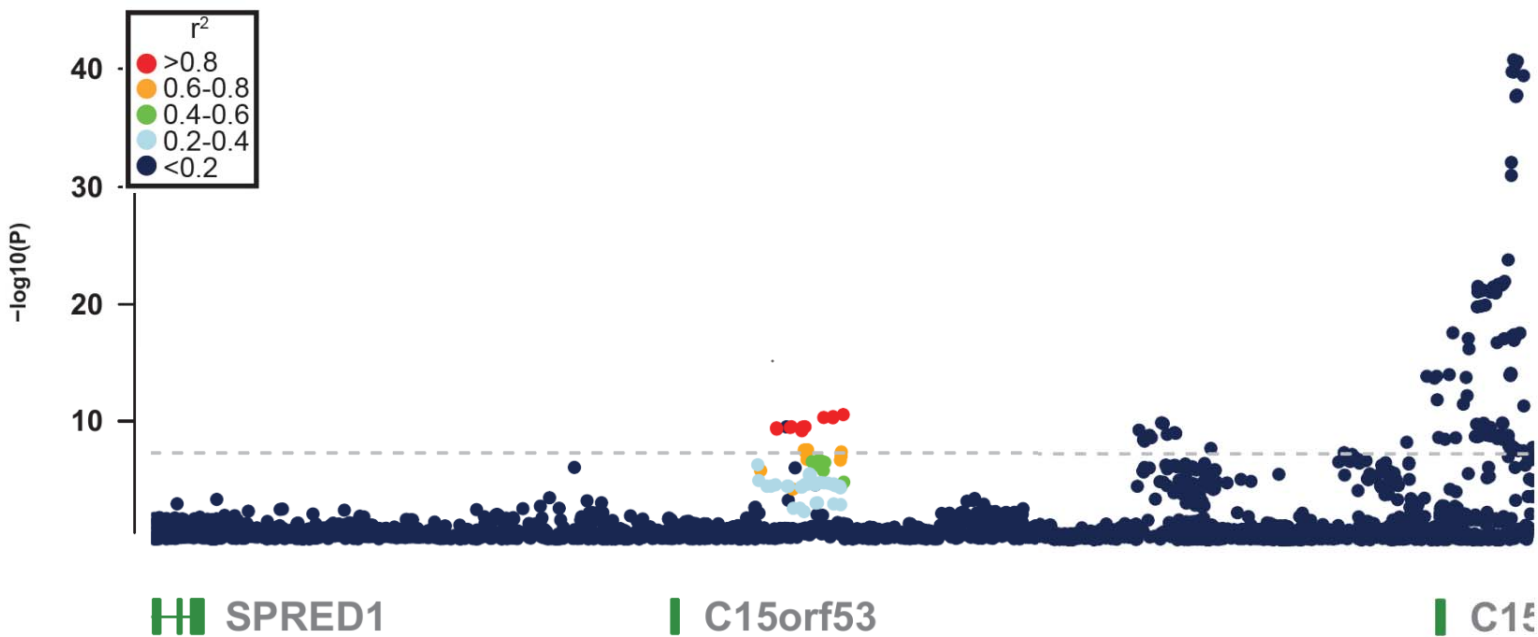

FAM98B

RASGRP1

GZ>CP  
CP>GZ

Corrected for total SA

Uncorrected

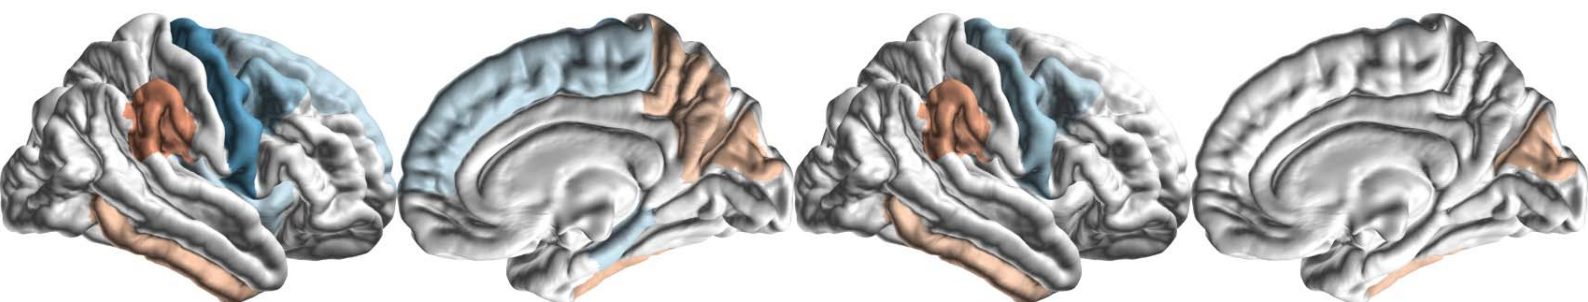

Zscore of the effect allele: C

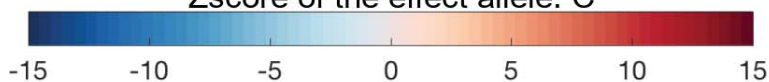



# Precentral SA: rs11070172

Chromosome 15

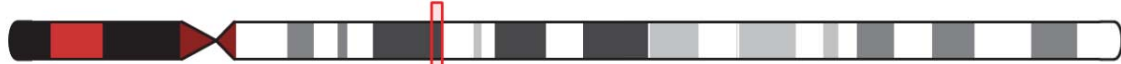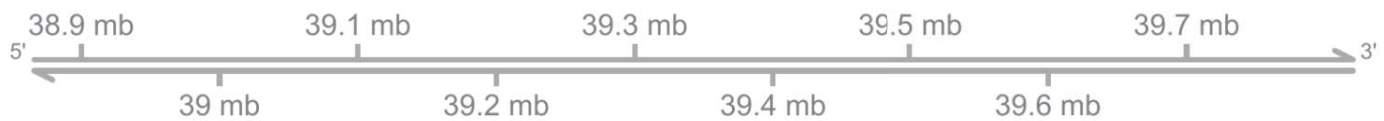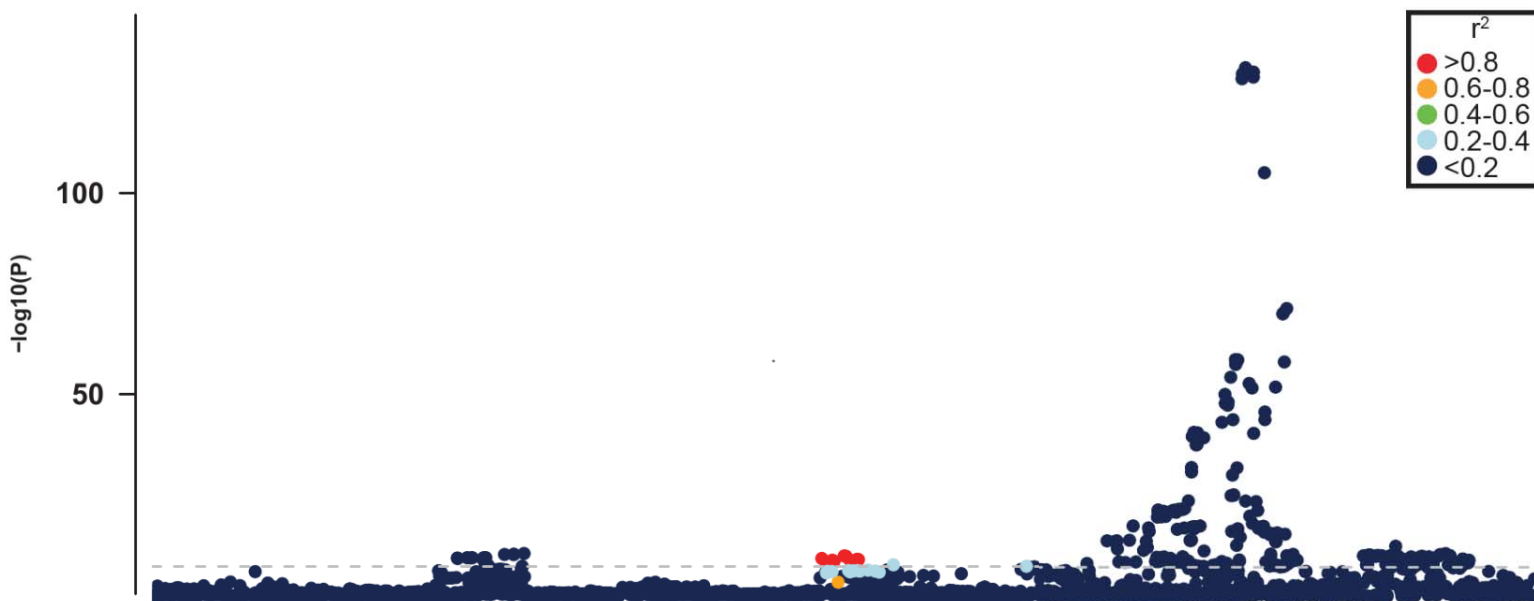

RASGRP1

C15orf54

C15orf53

GZ>CP

CP>GZ

Corrected for total SA

Uncorrected

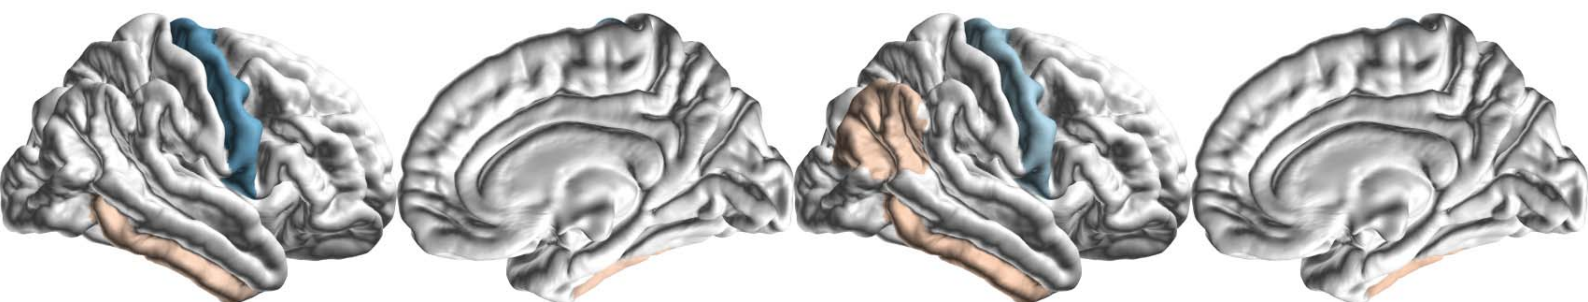

Zscore of the effect allele: T

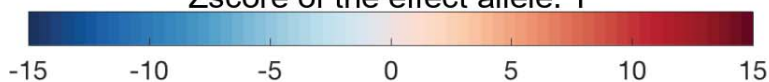

# Precentral SA: rs3862145

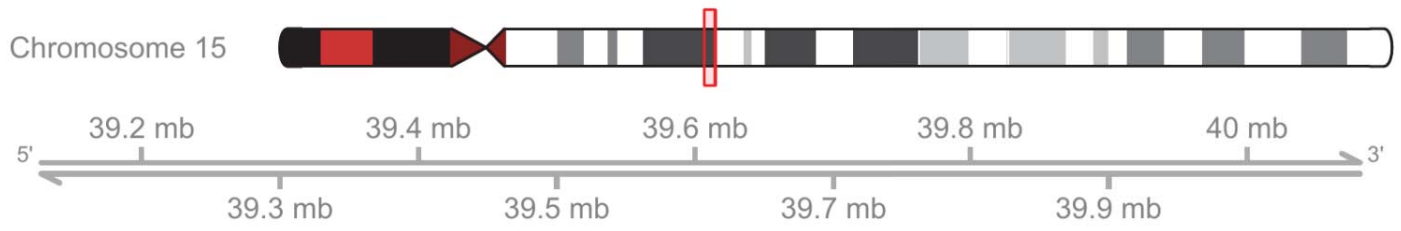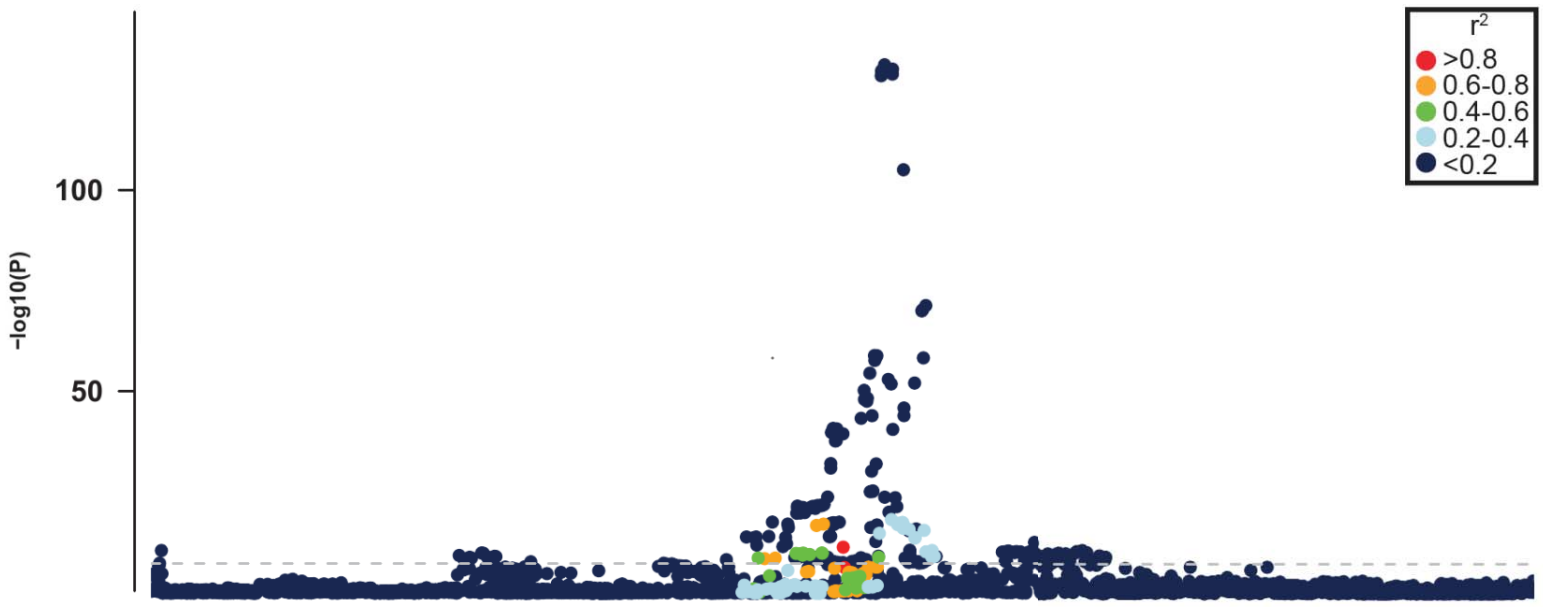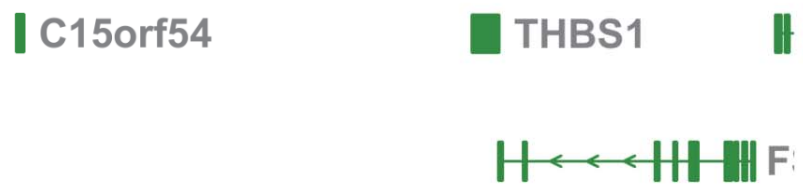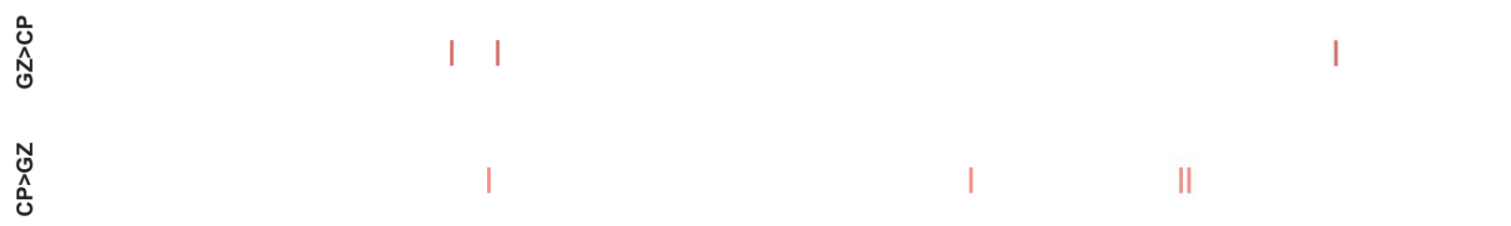

Corrected for total SA

Uncorrected

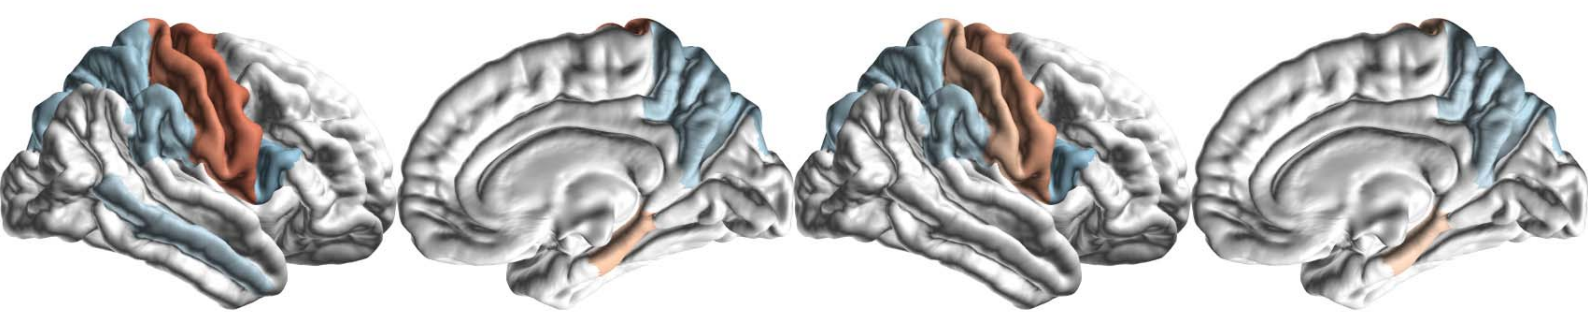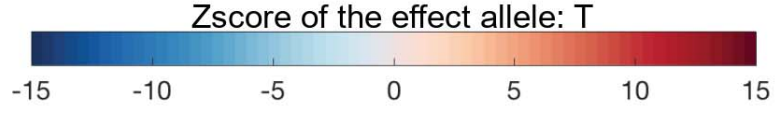

# Precentral SA: rs1080066

Chromosome 15

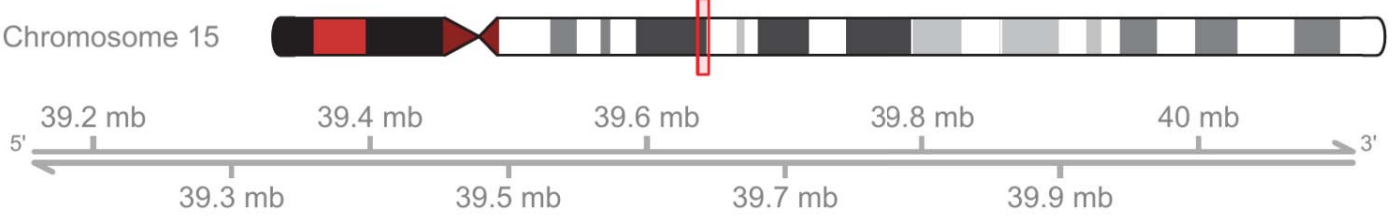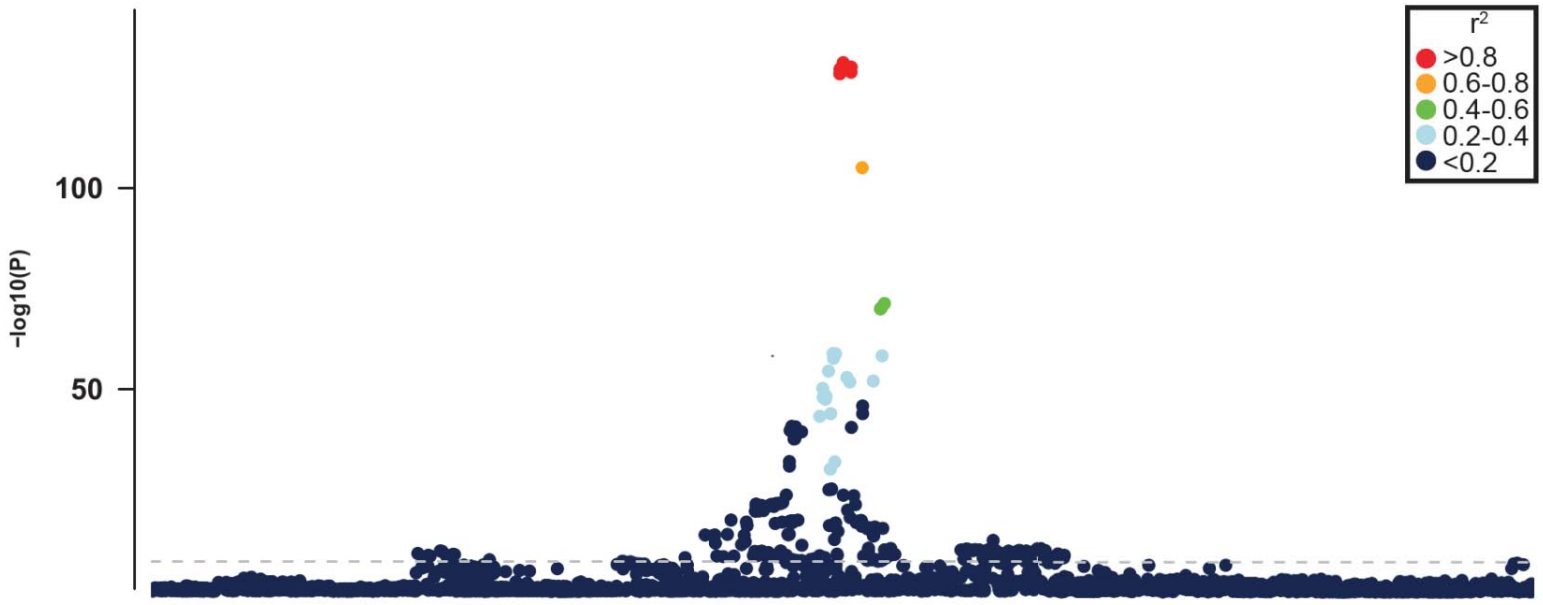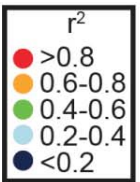

C15orf54

THBS1

FSII

GZ>CP

CP>GZ

Corrected for total SA

Uncorrected

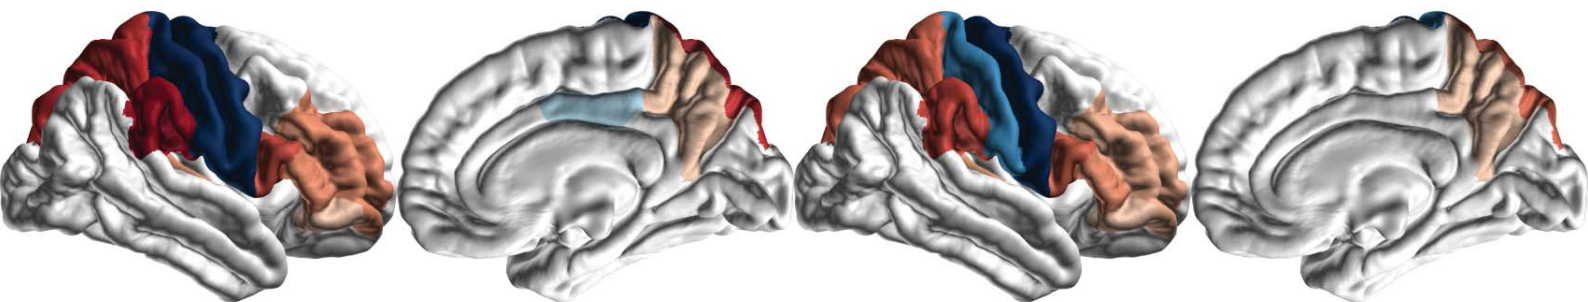

Zscore of the effect allele: A

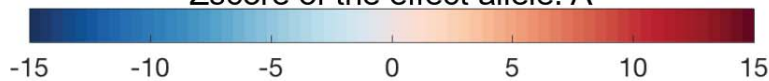



# Precentral TH: rs4724413

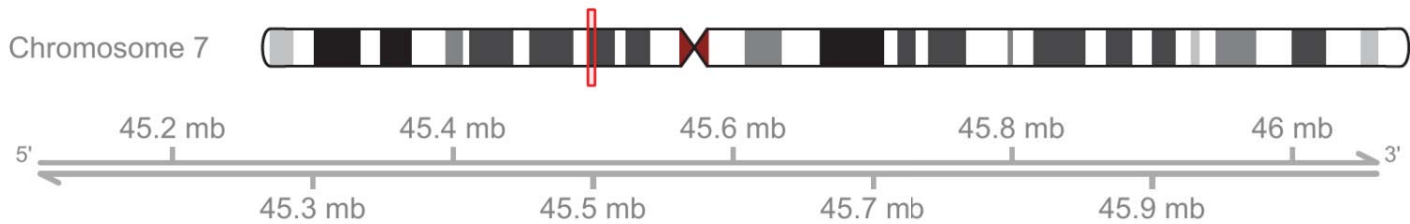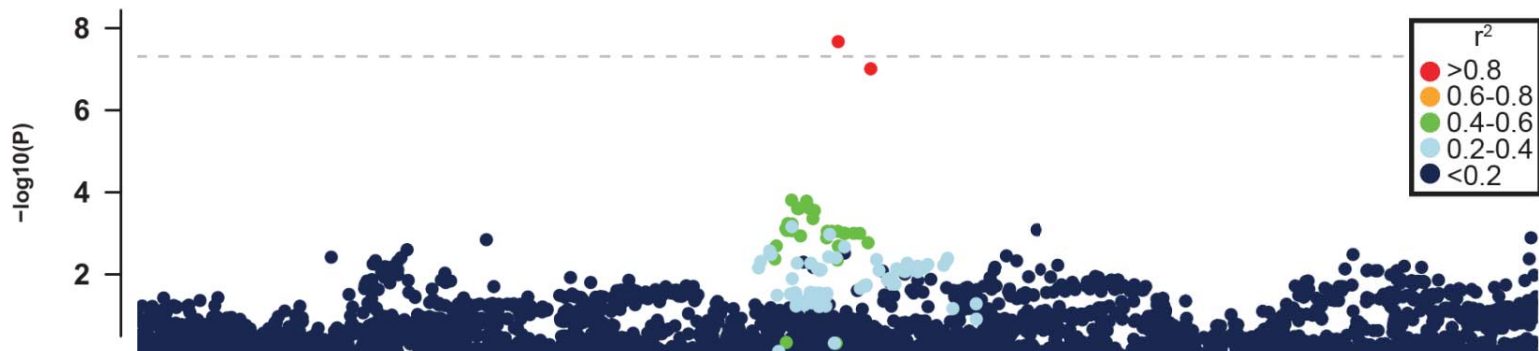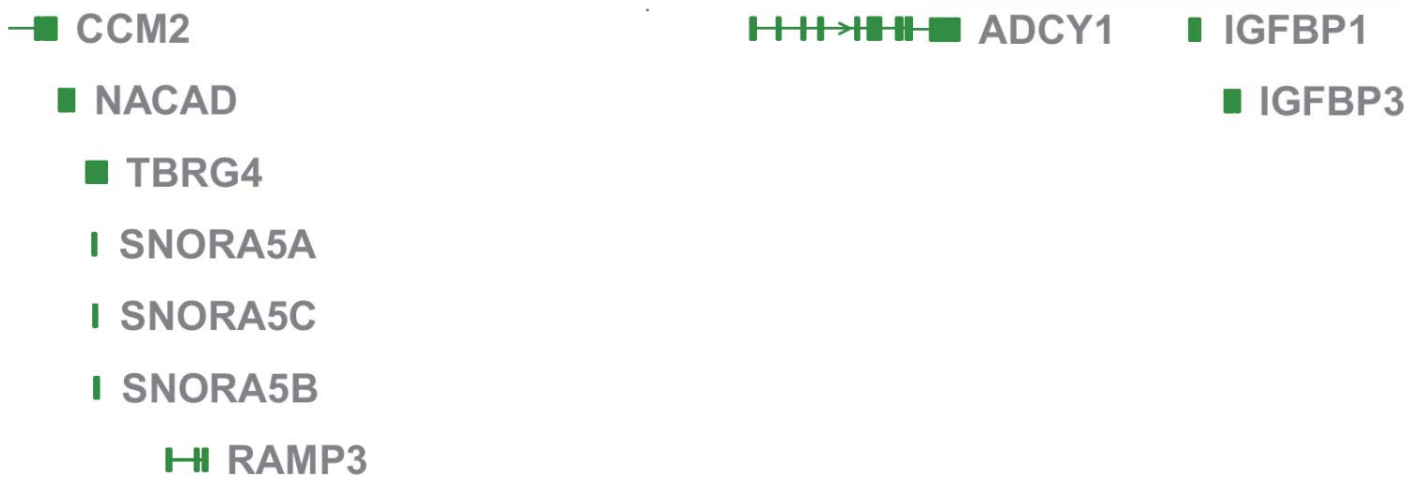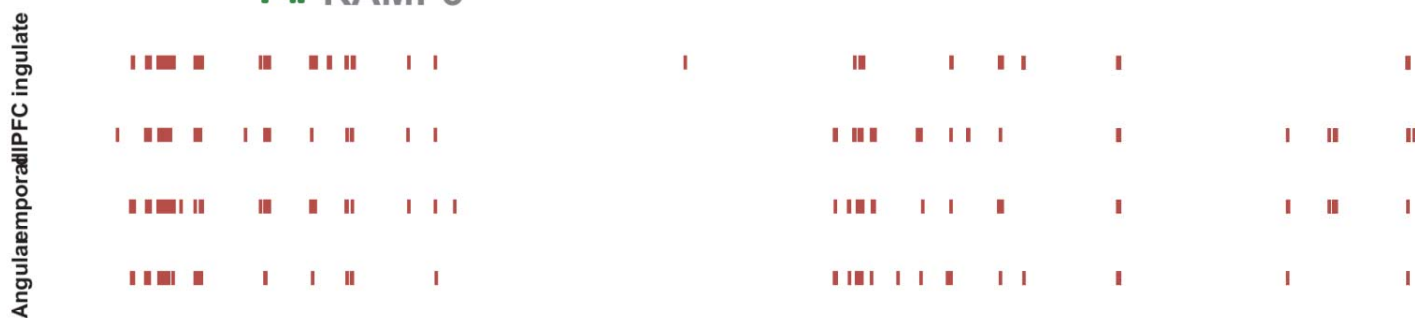

Corrected for average TH

Uncorrected

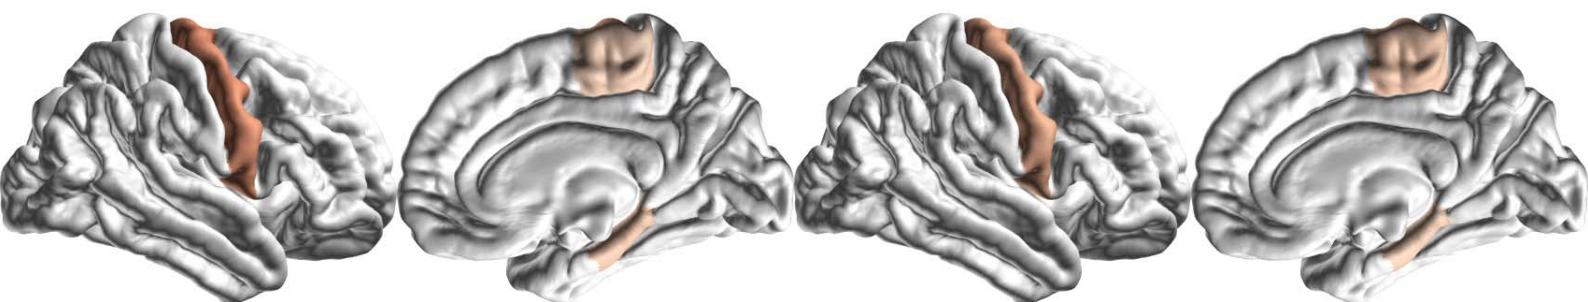

Zscore of the effect allele: T



# Postcentral SA: rs2279829

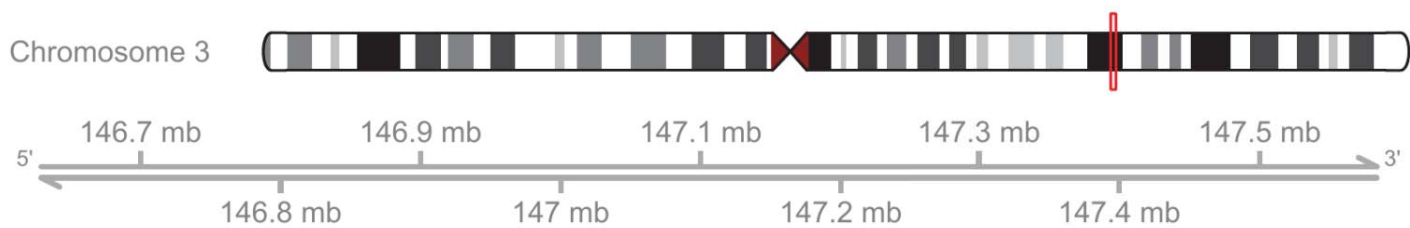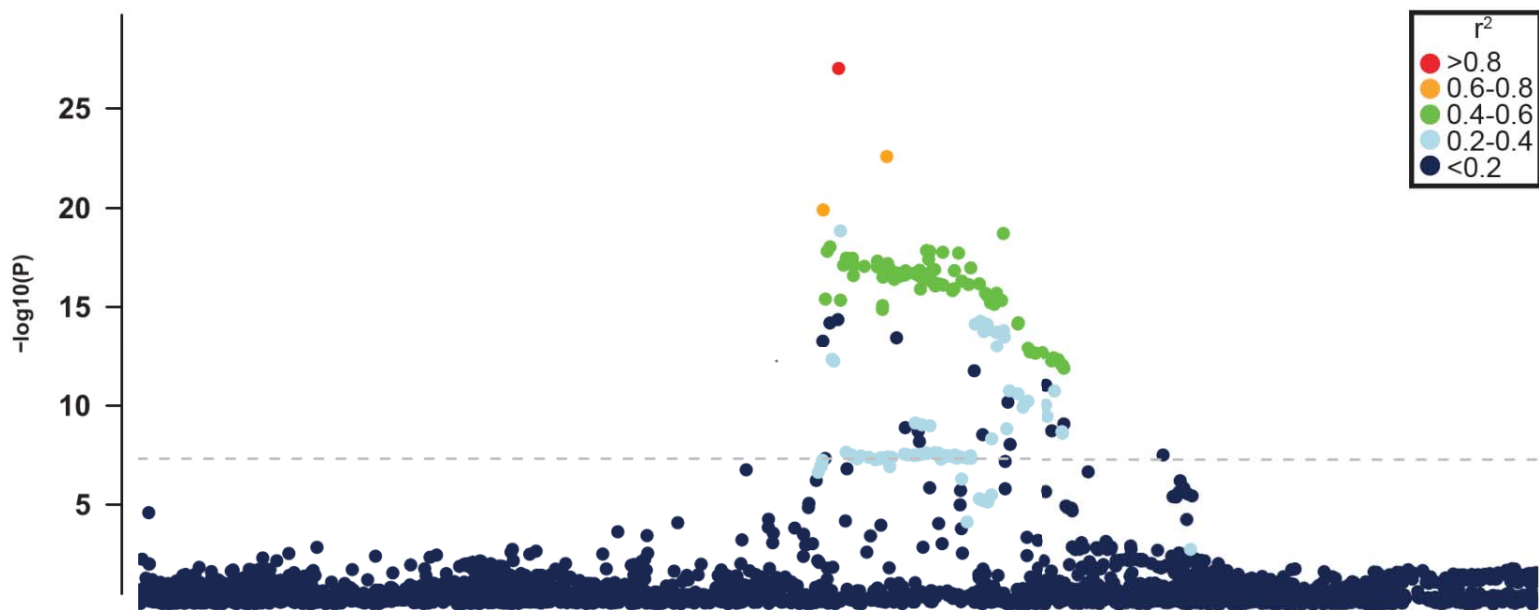

ZIC4

ZIC1

GZ>CP

CP>GZ

Corrected for total SA

Uncorrected

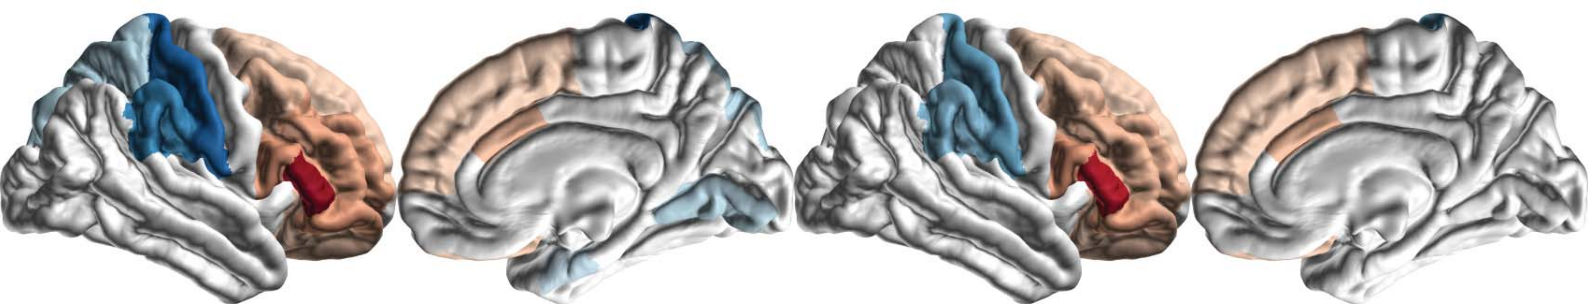

Zscore of the effect allele: T



# Postcentral SA: rs313135

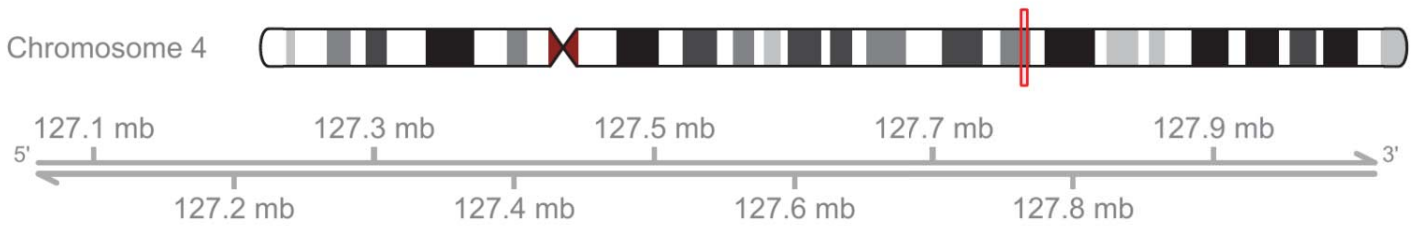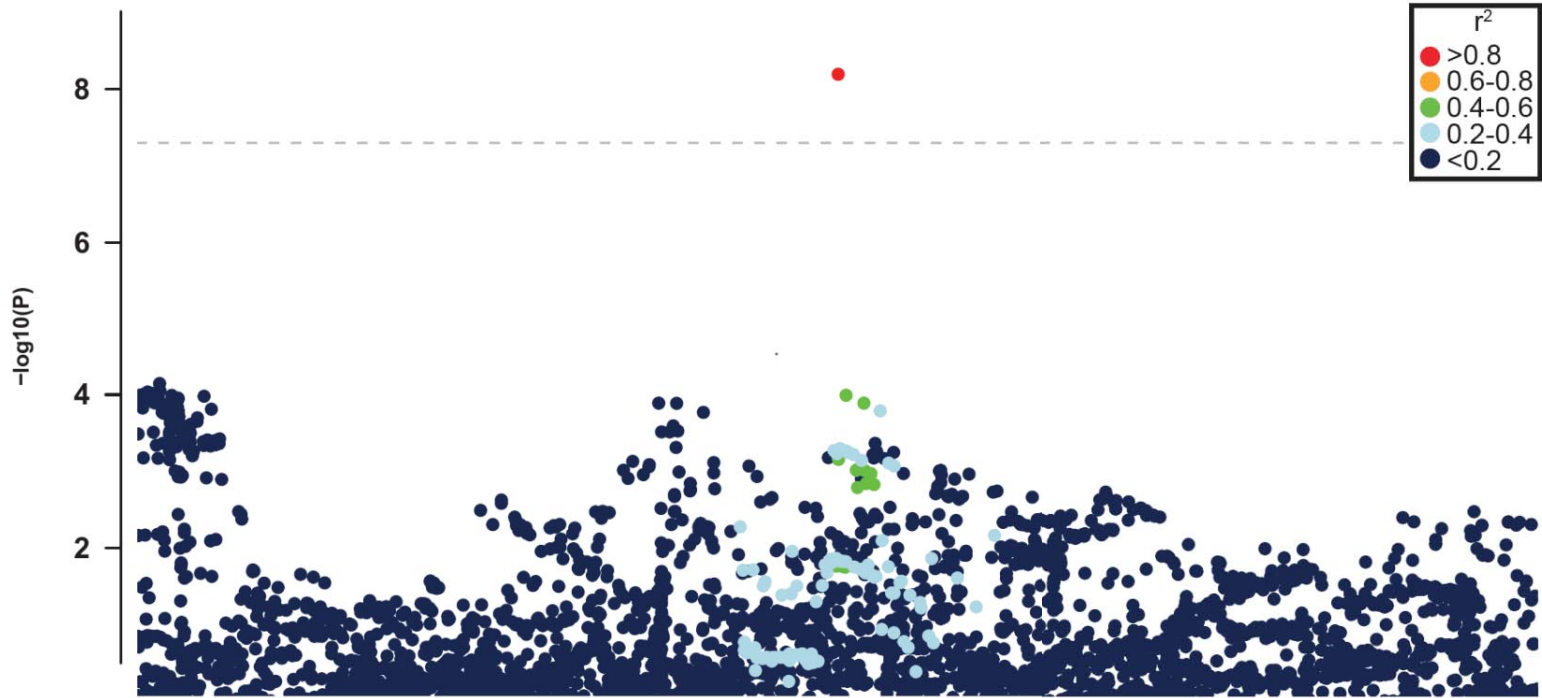

GZ>CP

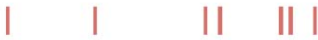

CP>GZ

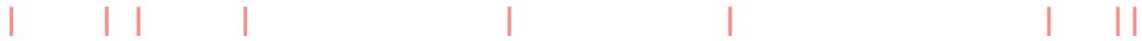

Corrected for total SA

Uncorrected

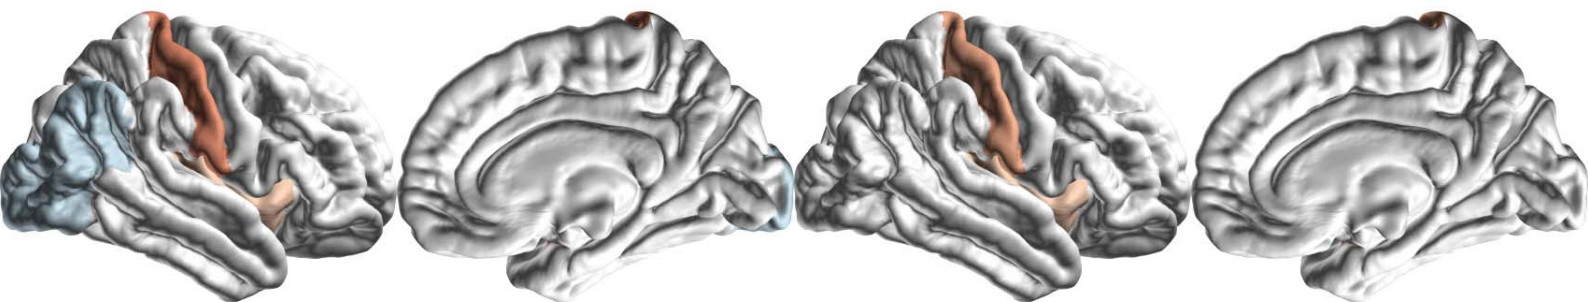

Zscore of the effect allele: T





# Postcentral SA: rs34322452

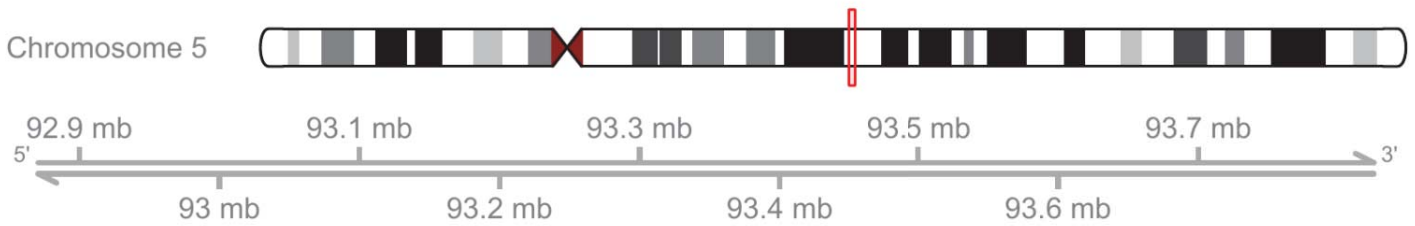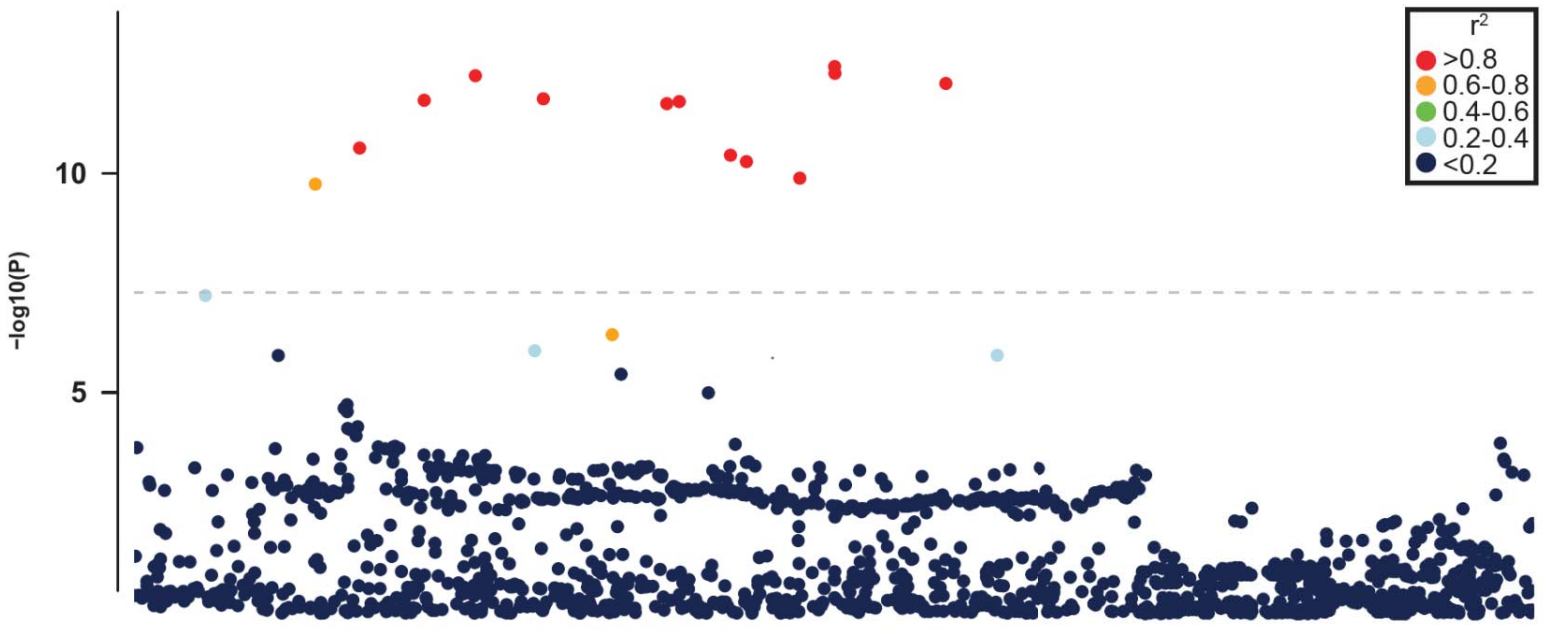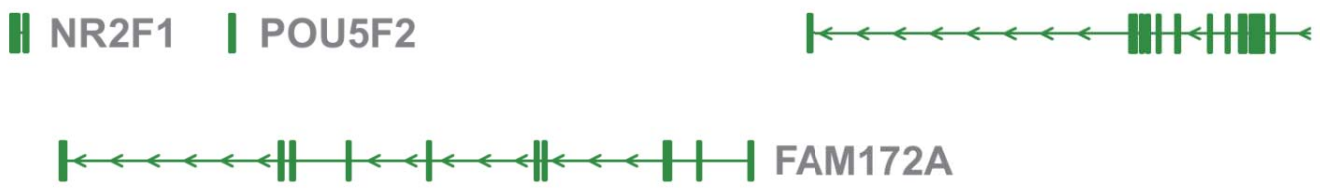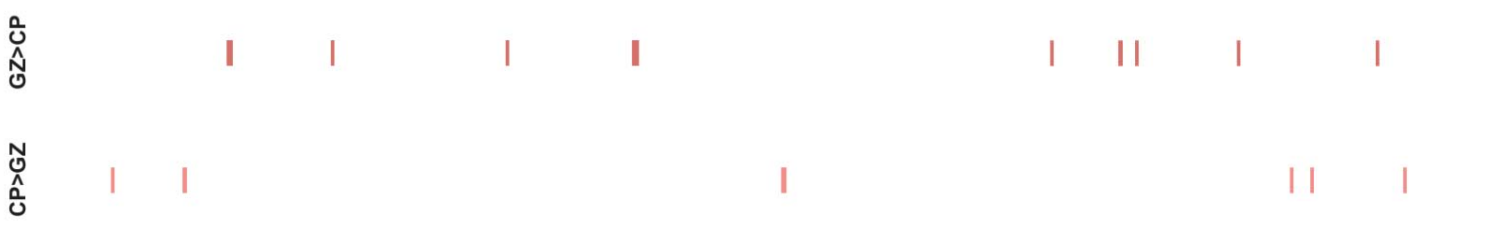

Corrected for total SA

Uncorrected

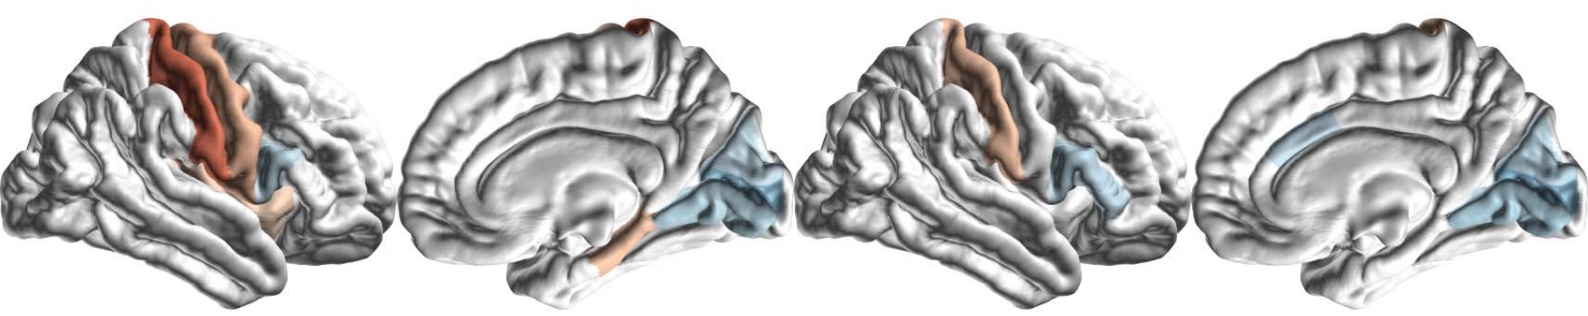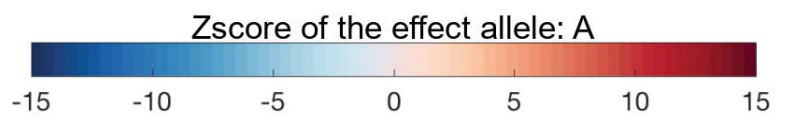

# Postcentral SA: rs11789773

Chromosome 9

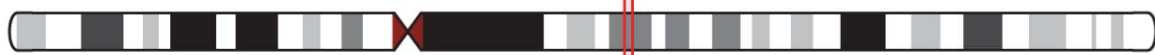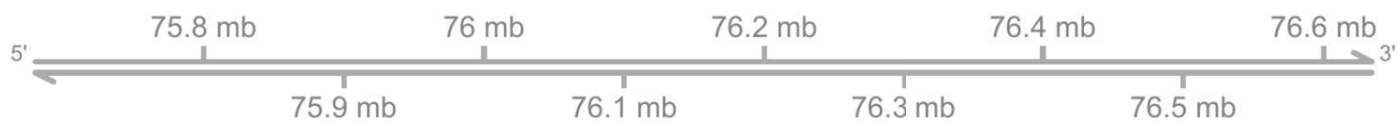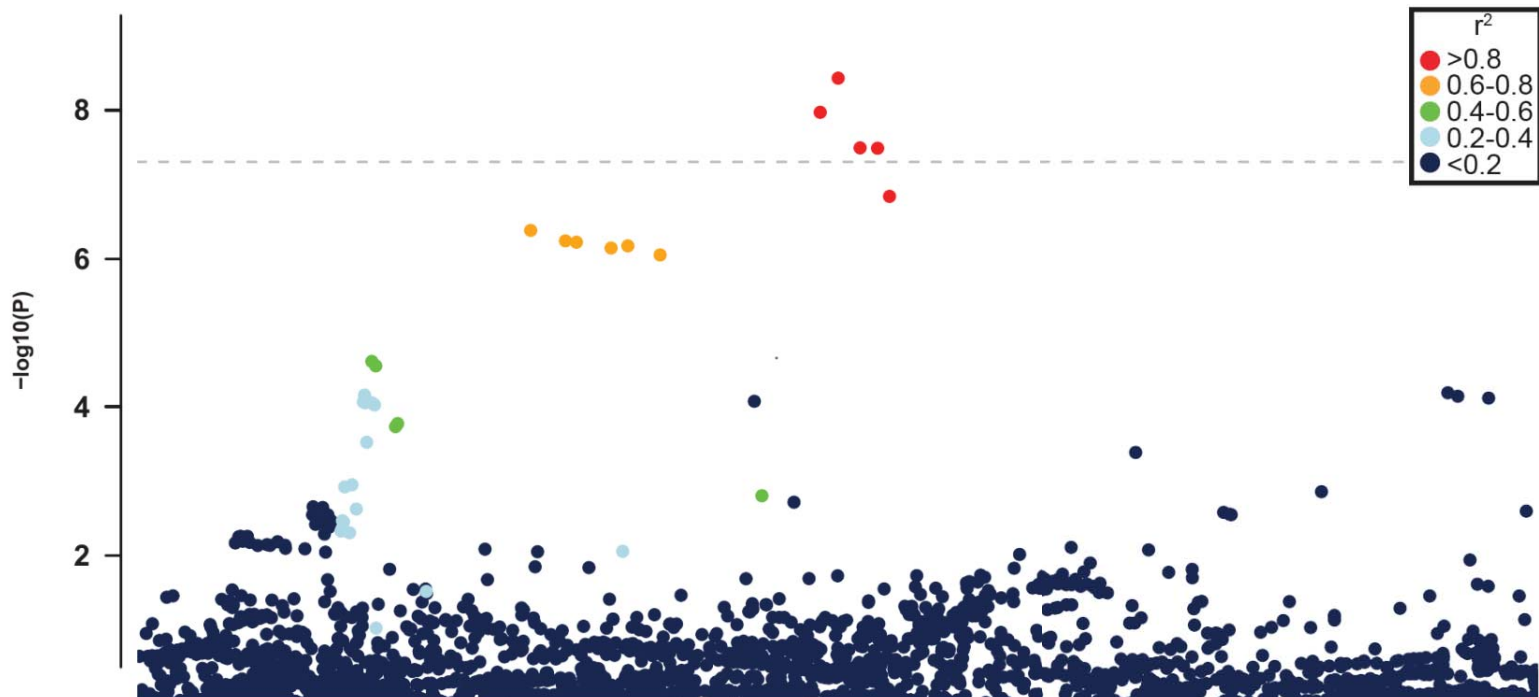

ANXA1

GZ>CP

CP>GZ

Corrected for total SA

Uncorrected

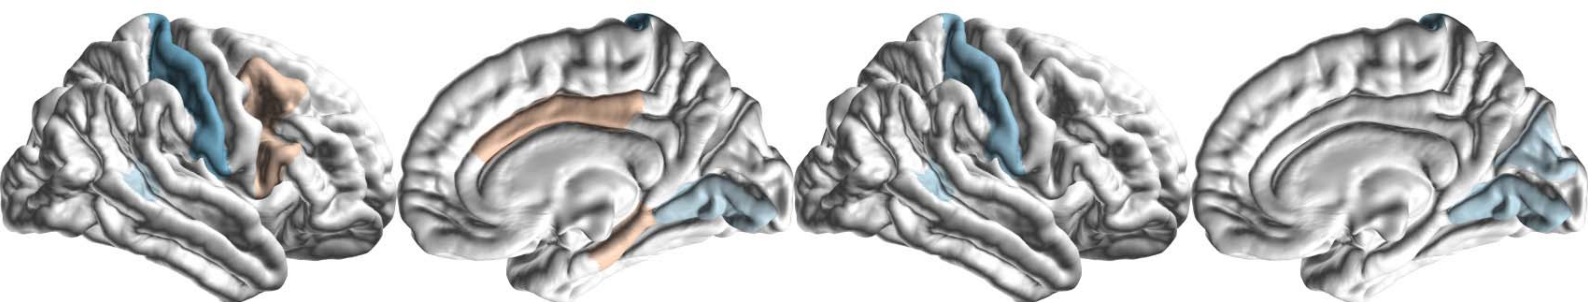

Zscore of the effect allele: A



# Postcentral SA: rs11033898

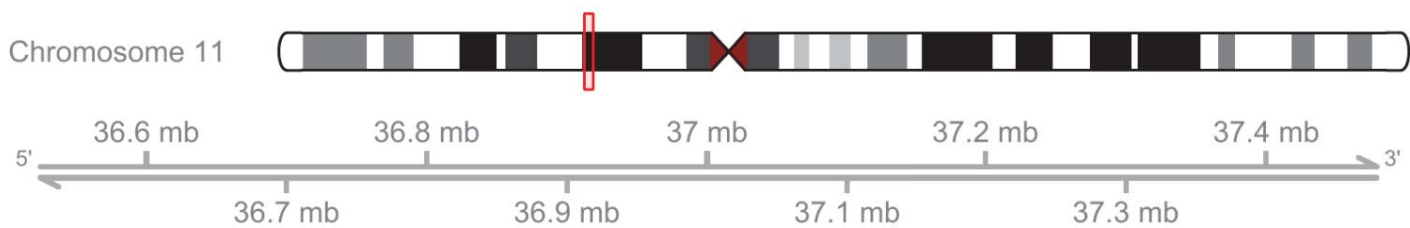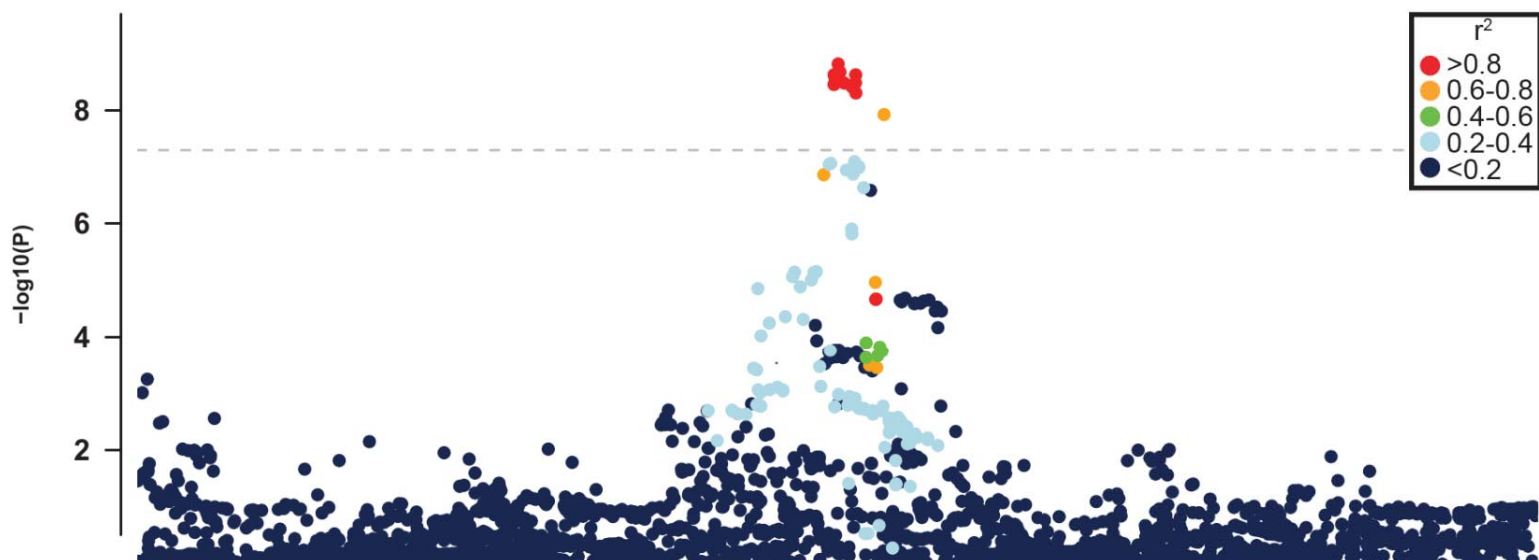

TRA1 RAG1

RAG2

C11orf74

GZ>CP

CP>GZ

Corrected for total SA

Uncorrected

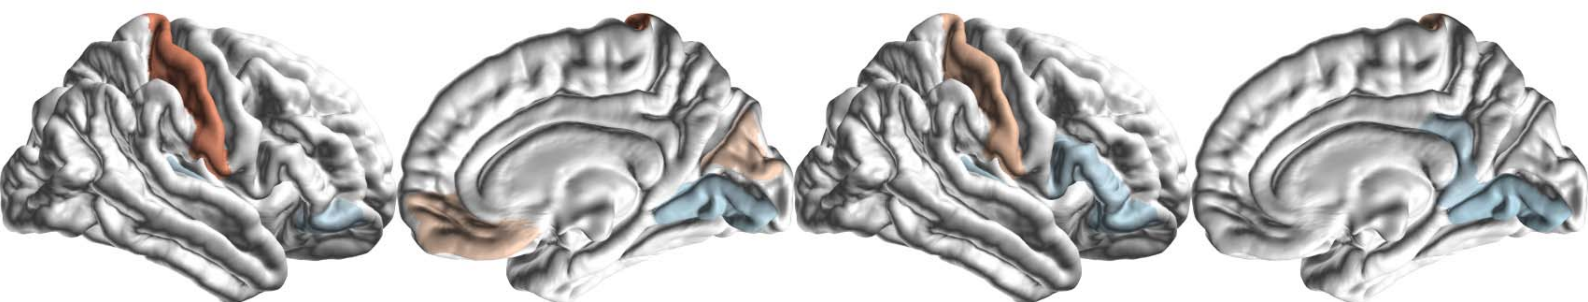

Zscore of the effect allele: C





# Postcentral SA: rs3862145

Chromosome 15

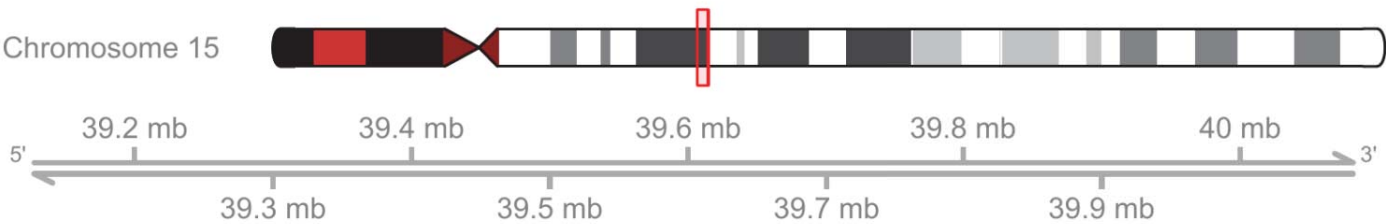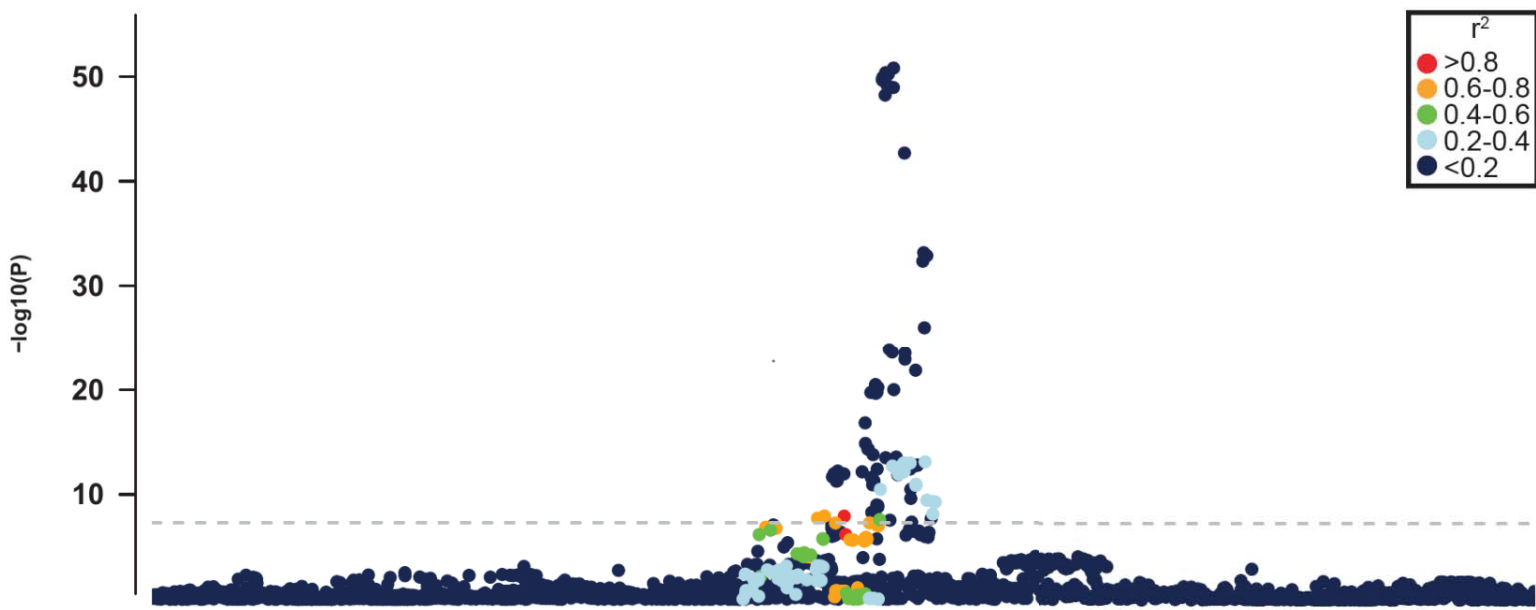

C15orf54

THBS1

F

GZ>CP

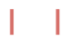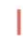

CP>GZ

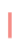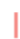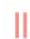

Corrected for total SA

Uncorrected

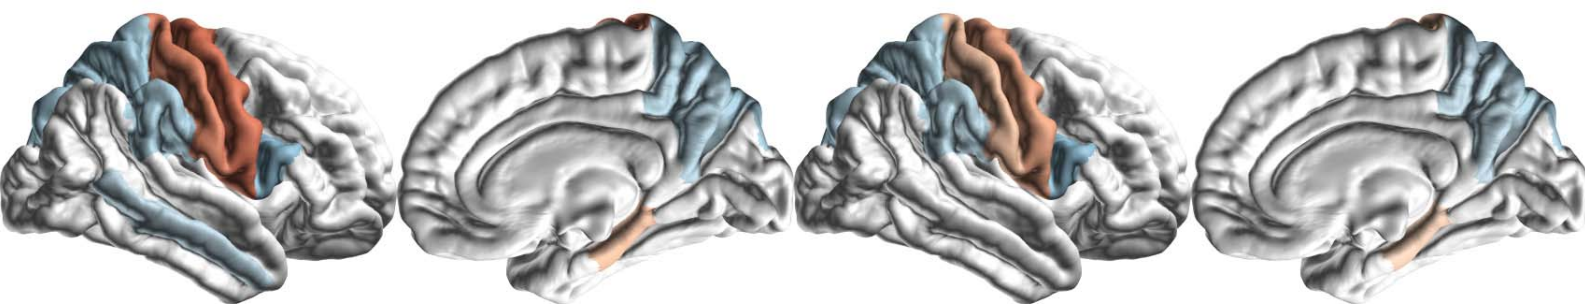

Zscore of the effect allele: T



### Postcentral SA: rs4924346

Chromosome 15

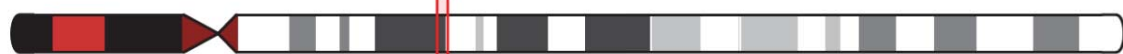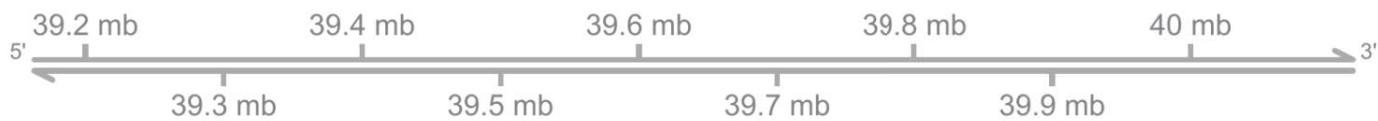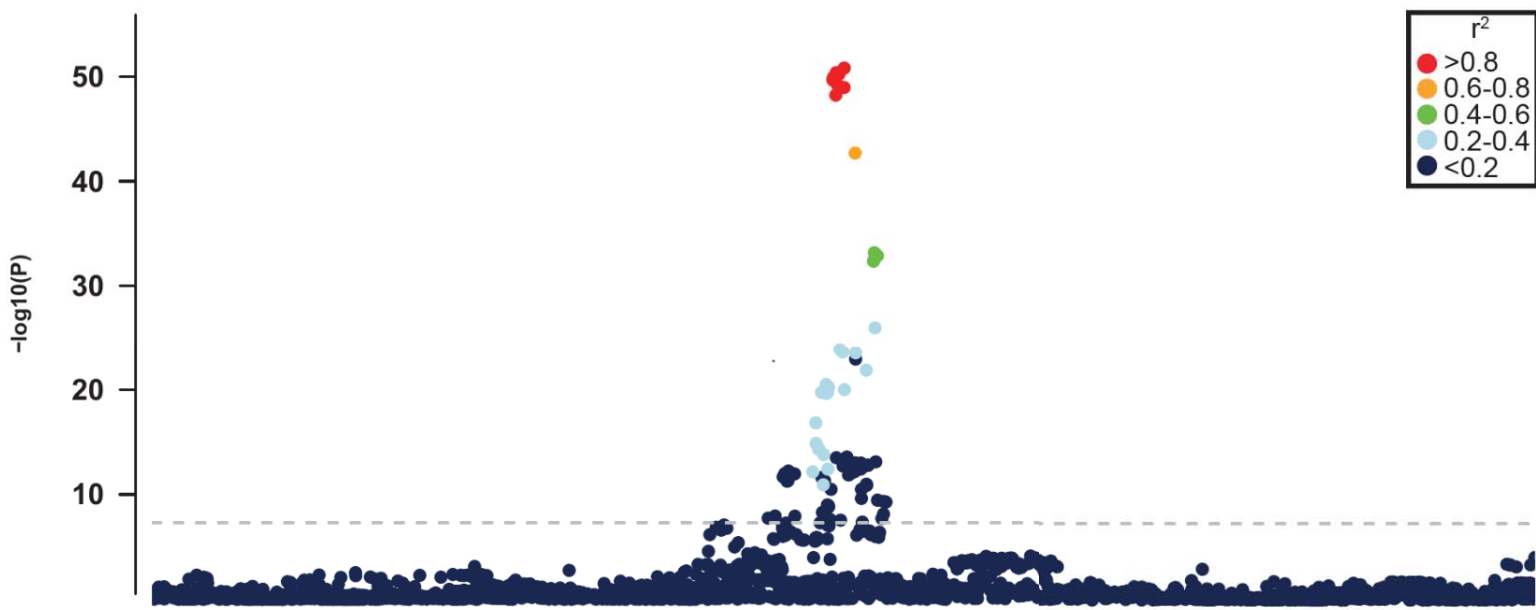

C15orf54

THBS1

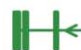

FSIF

GZ>CP

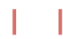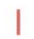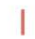

CP>GZ

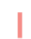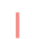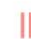

Corrected for total SA

Uncorrected

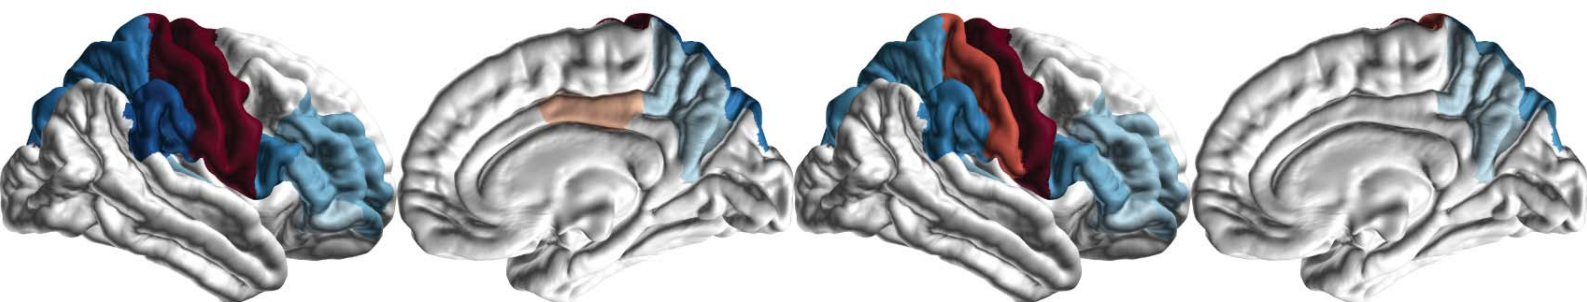

Zscore of the effect allele: A

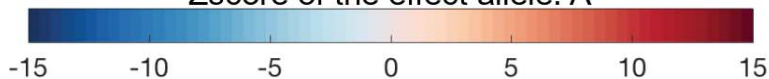

# Postcentral SA: rs117623407

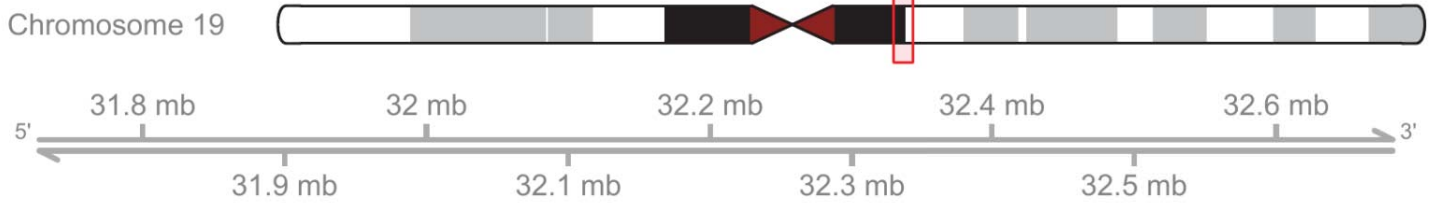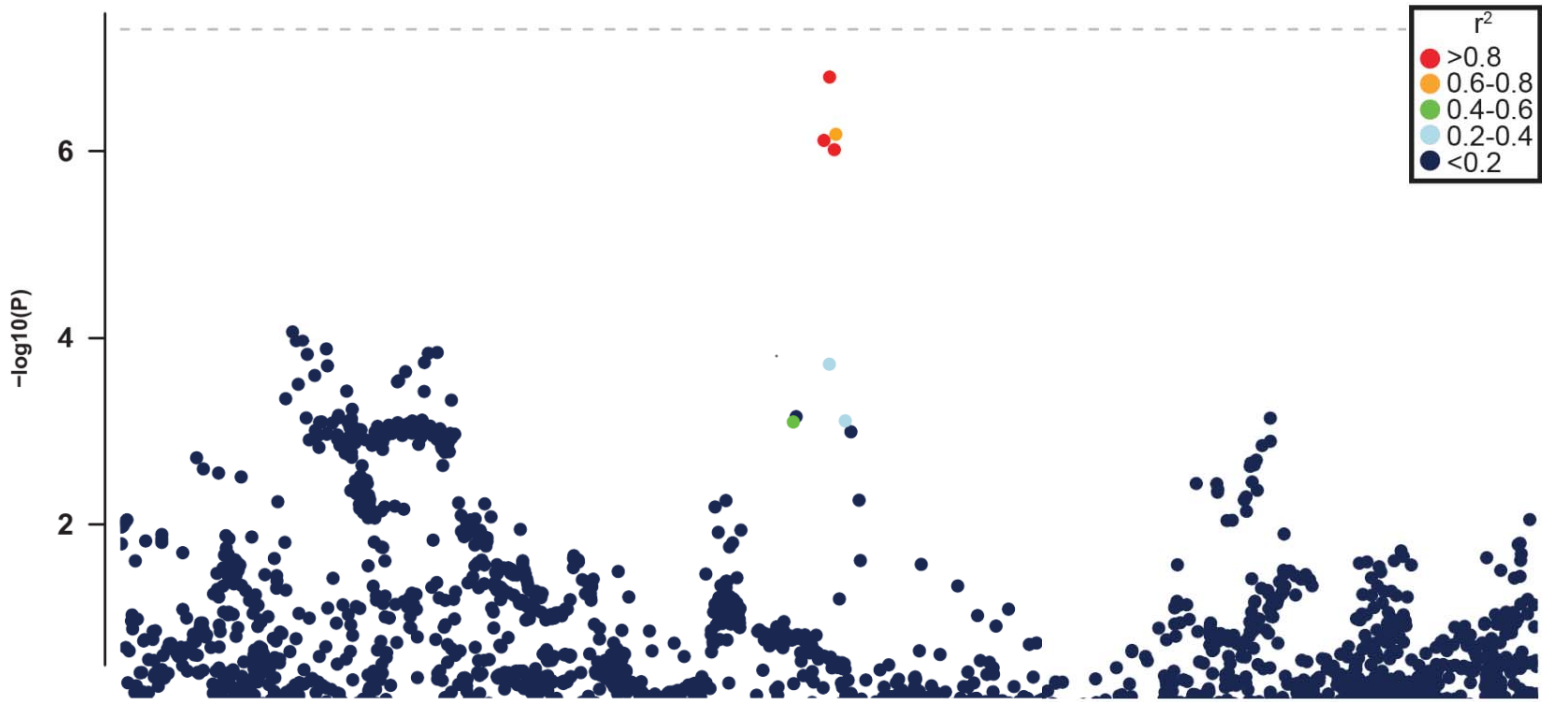

TSHZ3

GZ>CP

CP>GZ

Corrected for total SA

Uncorrected

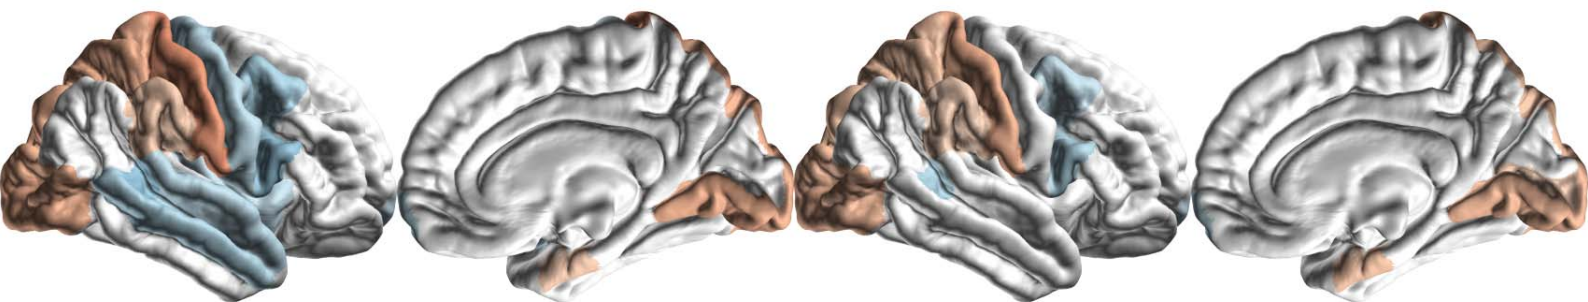

Zscore of the effect allele: A





# Postcentral TH: rs11639391

Chromosome 15

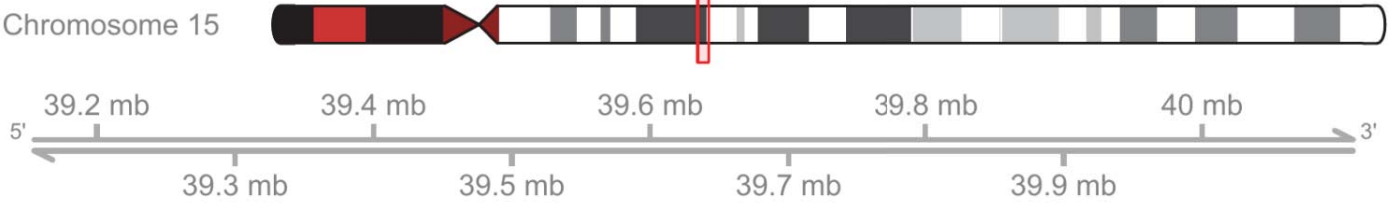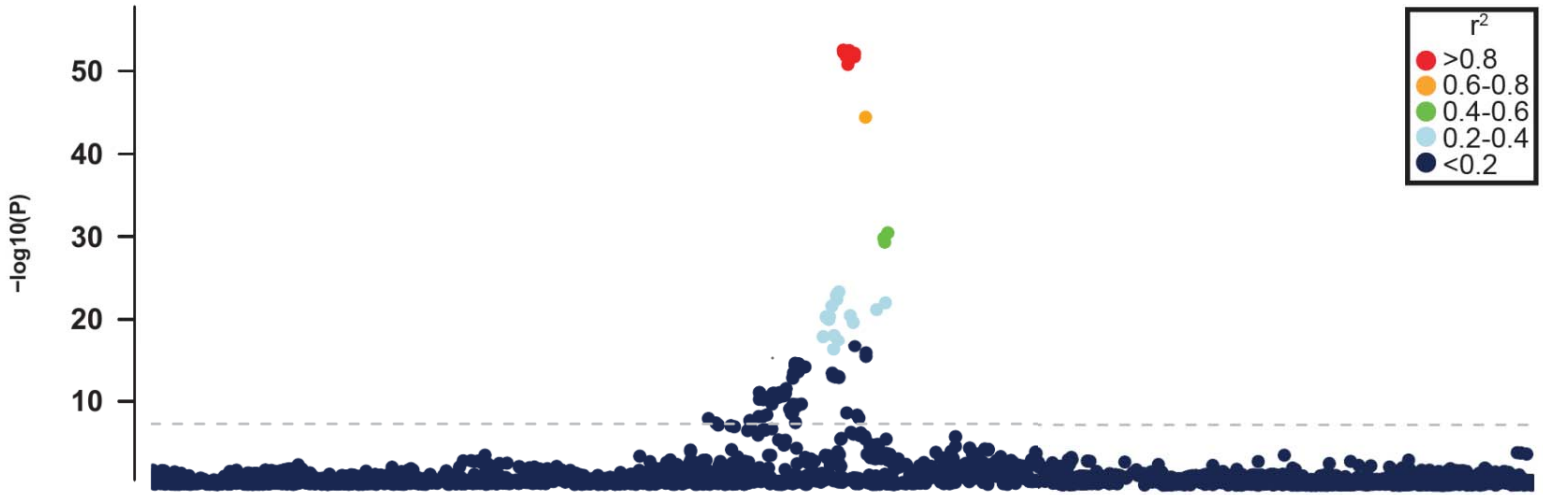

C15orf54

THBS1

FSI

FSI

Angular  
Temporal  
dIPFC  
Cingulate

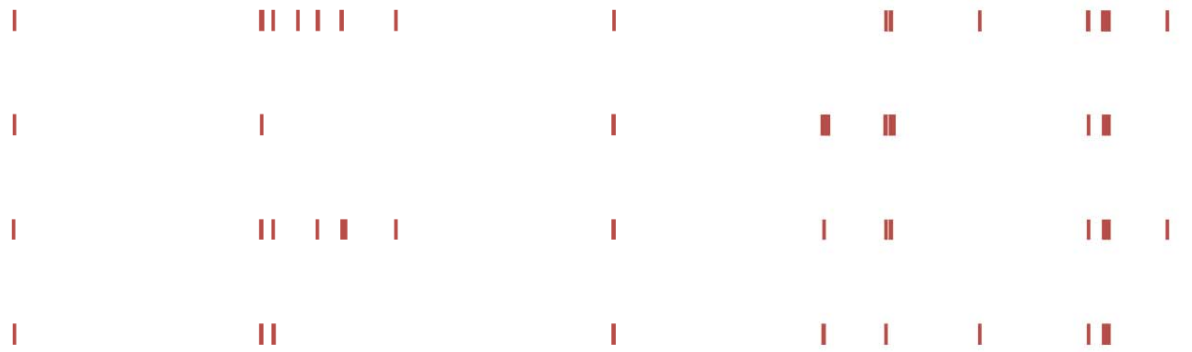

Corrected for average TH

Uncorrected

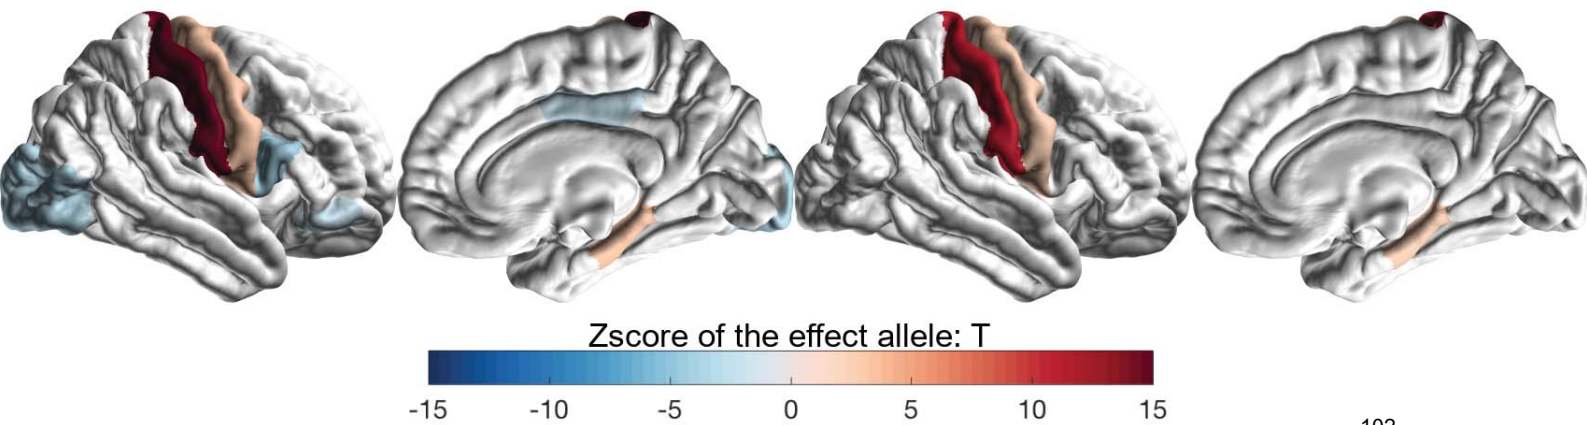

Zscore of the effect allele: T

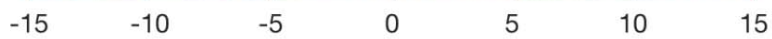

# Postcentral TH: rs12958970

Chromosome 18

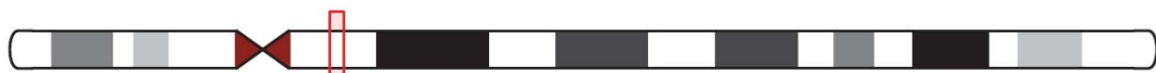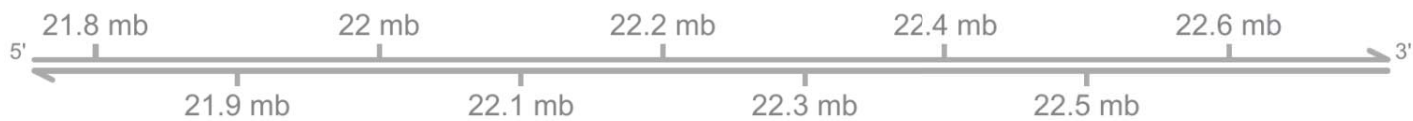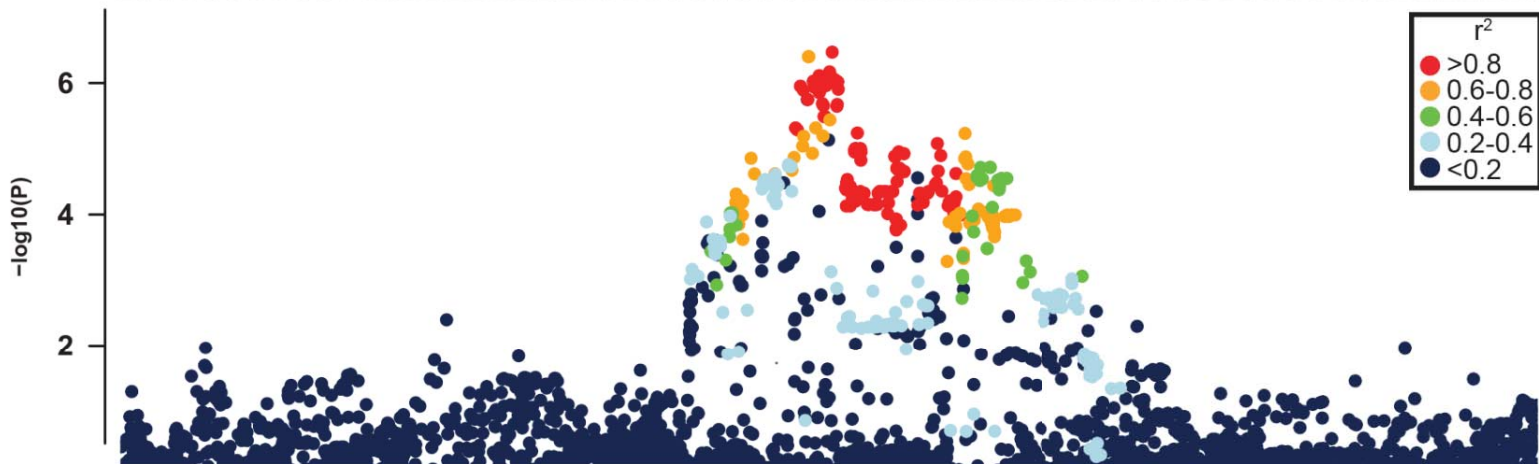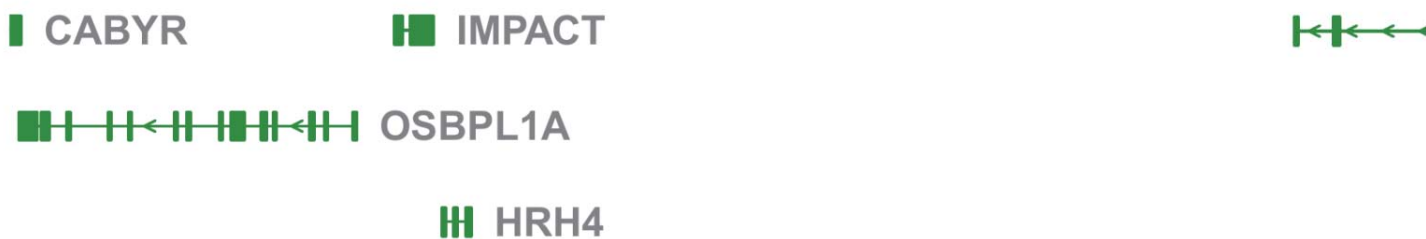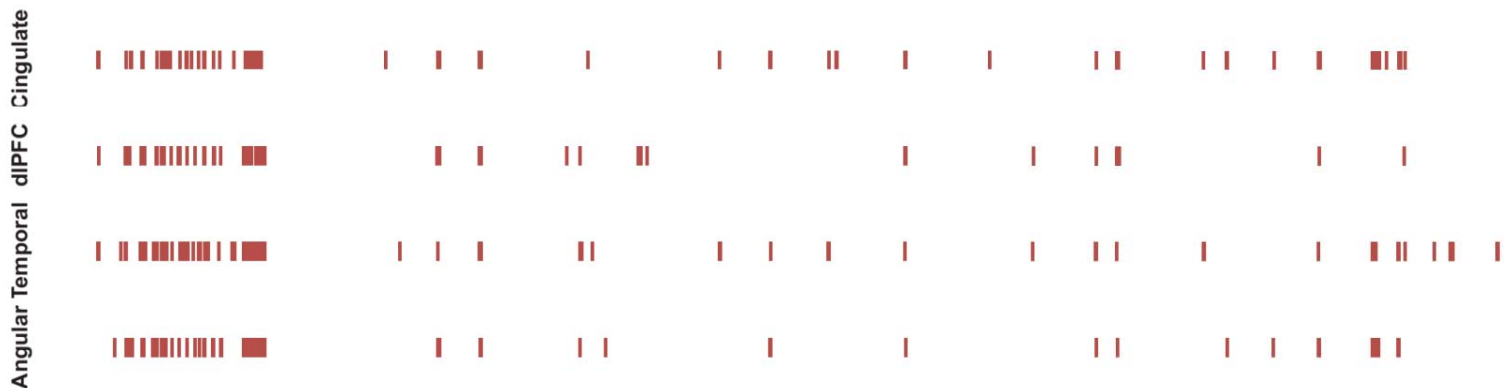

Corrected for average TH

Uncorrected

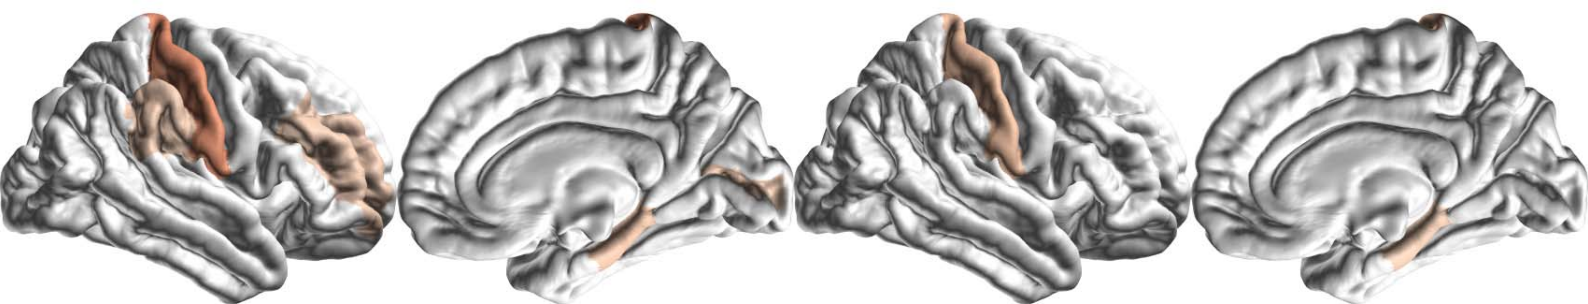

Zscore of the effect allele: C

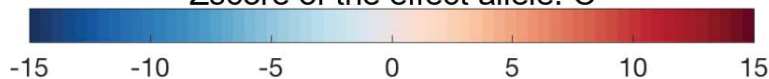

# Postcentral TH: rs4823877

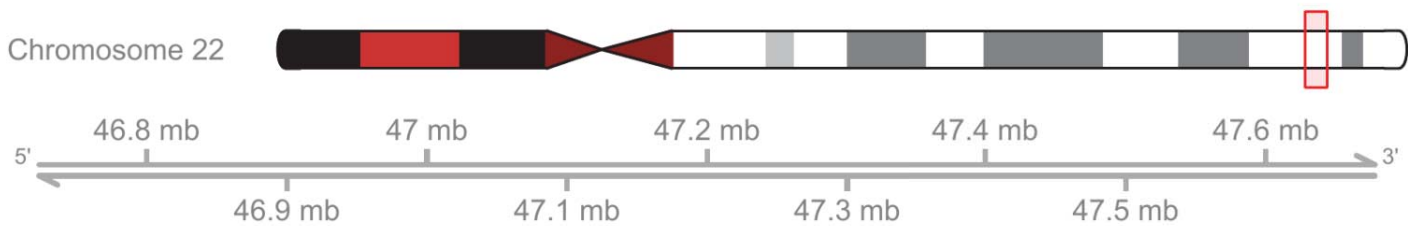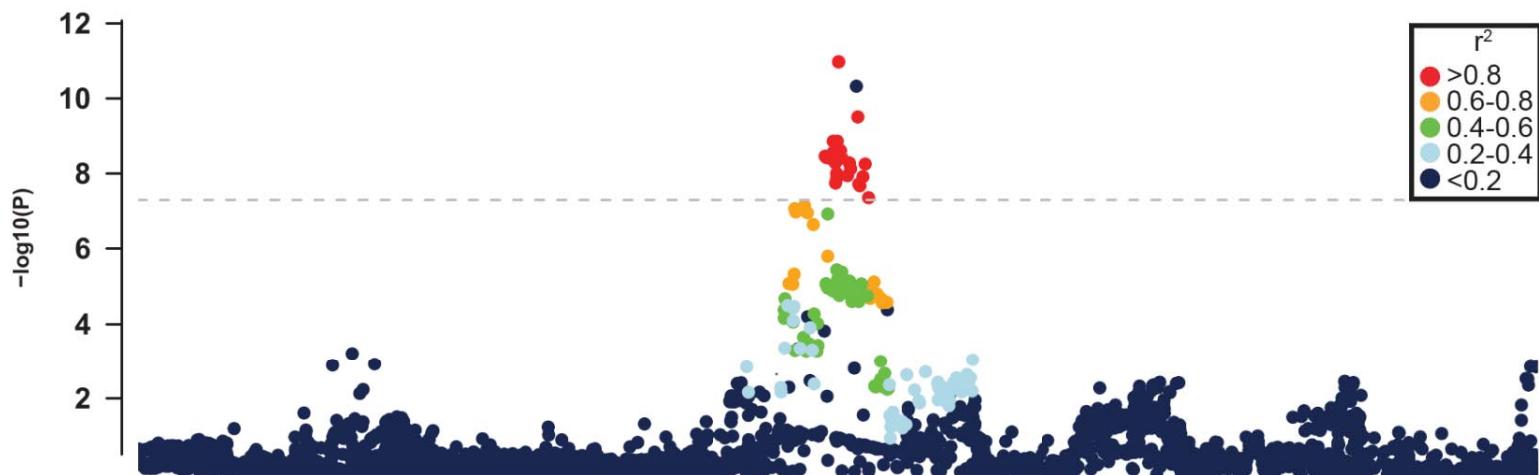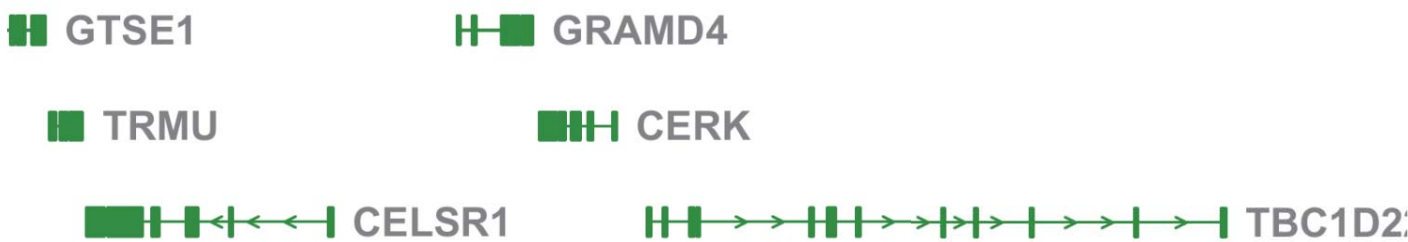

Angular Temporal dIPFC Cingulate

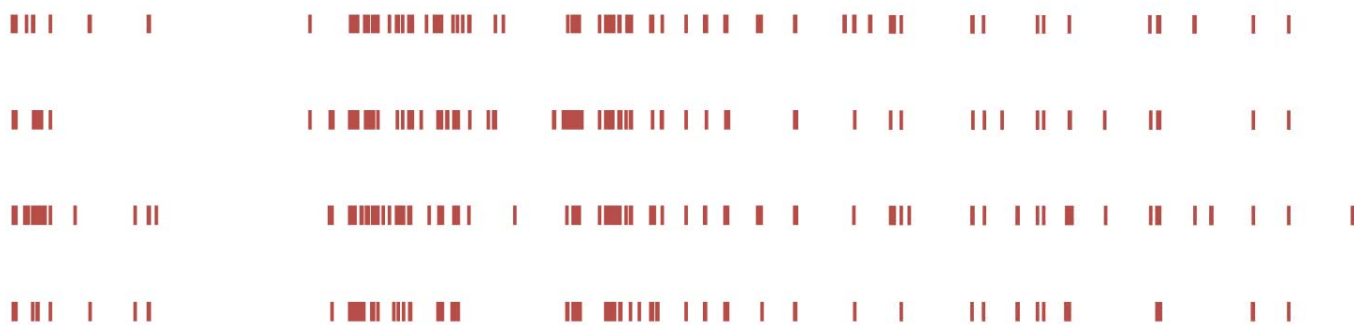

Corrected for average TH

Uncorrected

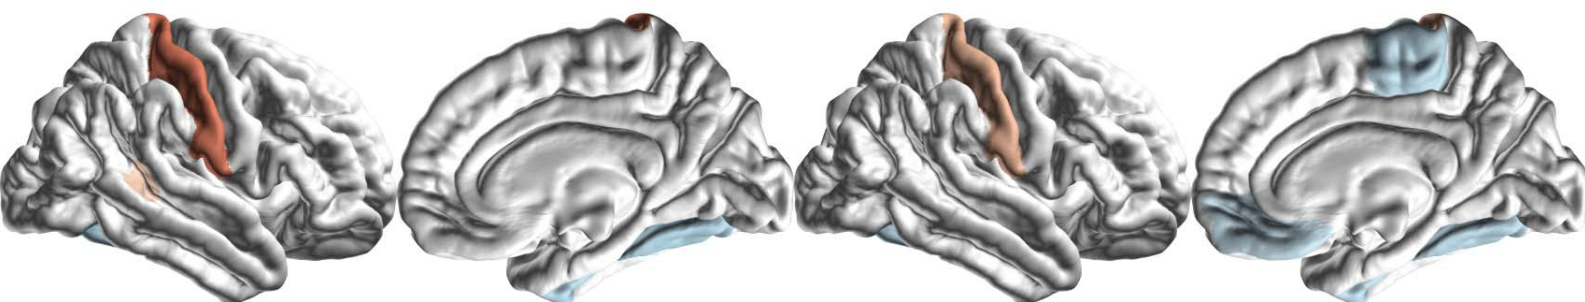

Zscore of the effect allele: T

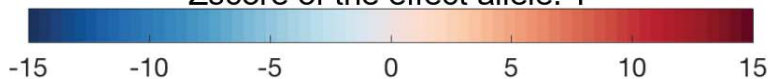



# Precuneus SA: rs59373415

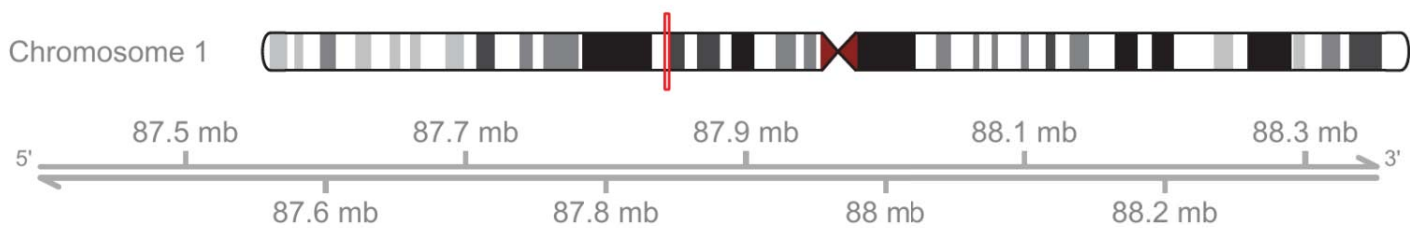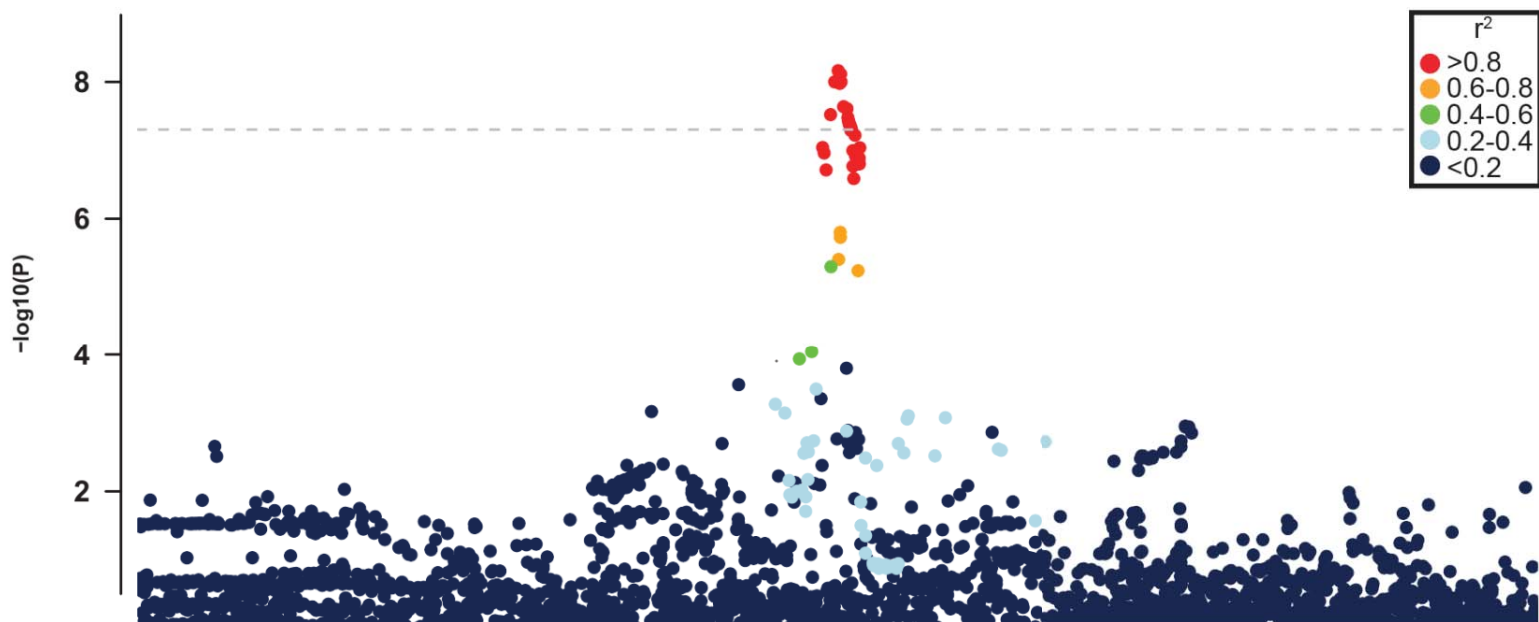

SEP15

LMO4

HS2ST1

GZ>CP

CP>GZ

Corrected for total SA

Uncorrected

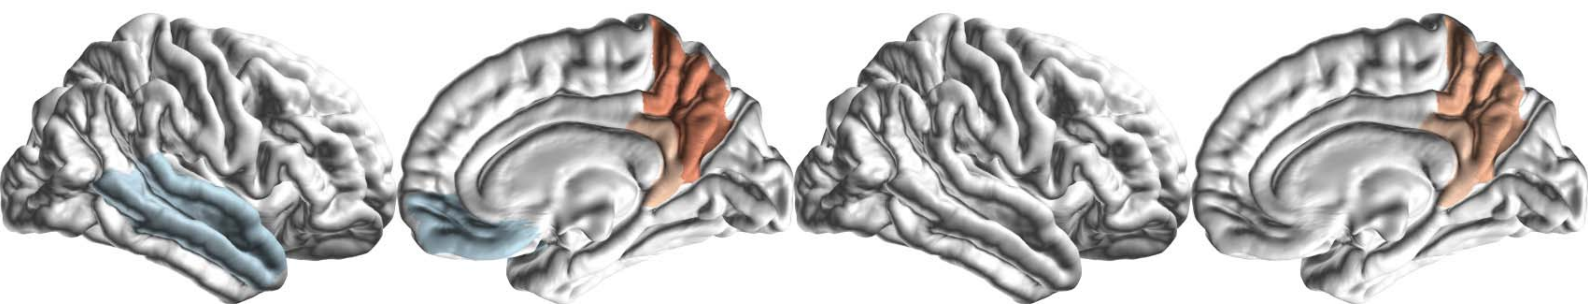

Zscore of the effect allele: C

-15 -10 -5 0 5 10 15

### Precuneus SA: rs7559976

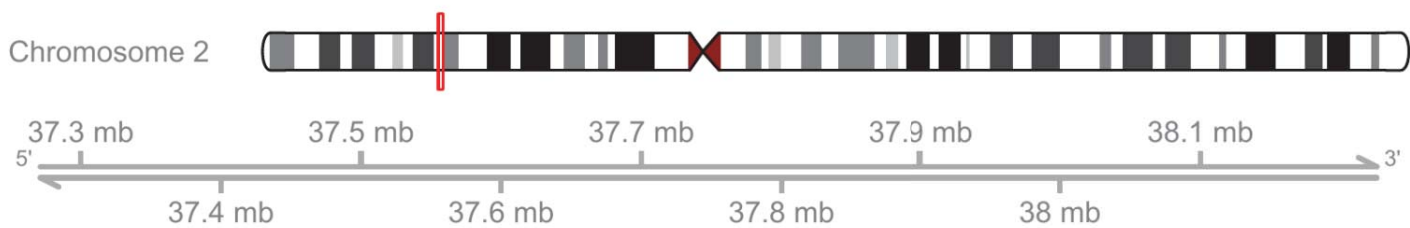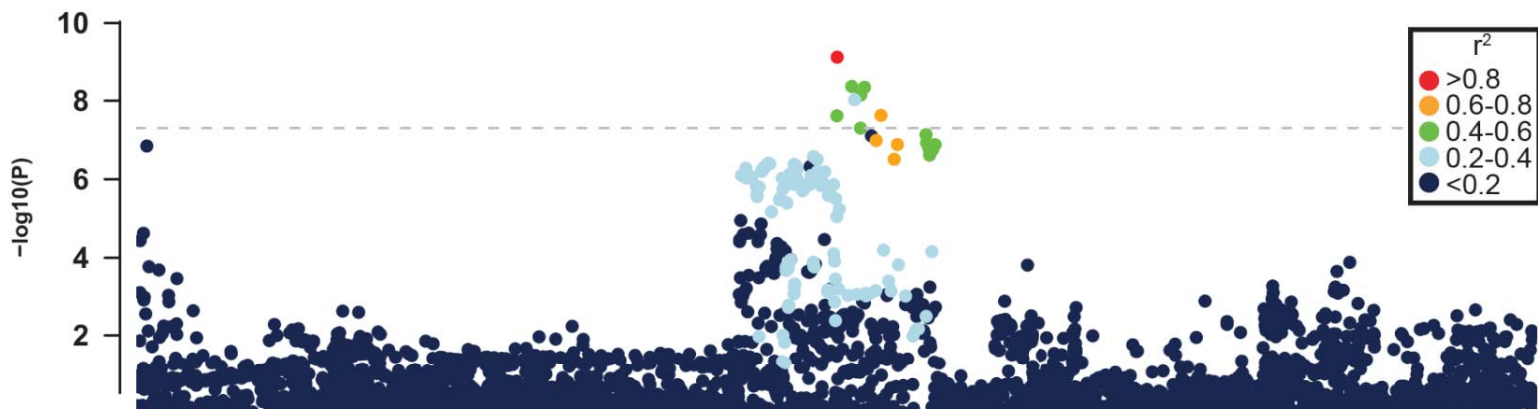

HEATR5B QPCT CDC42EP3

GPATCH11

EIF2AK2

SULT6B1

CEBPZ

NDUFAF7

PRKD3

CP>GZ GZ>CP

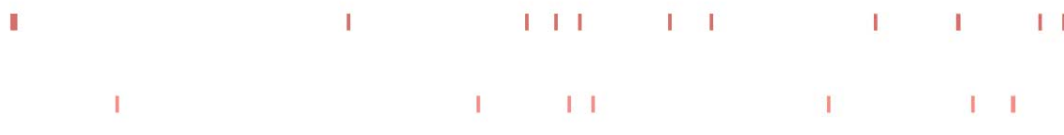

Corrected for total SA

Uncorrected

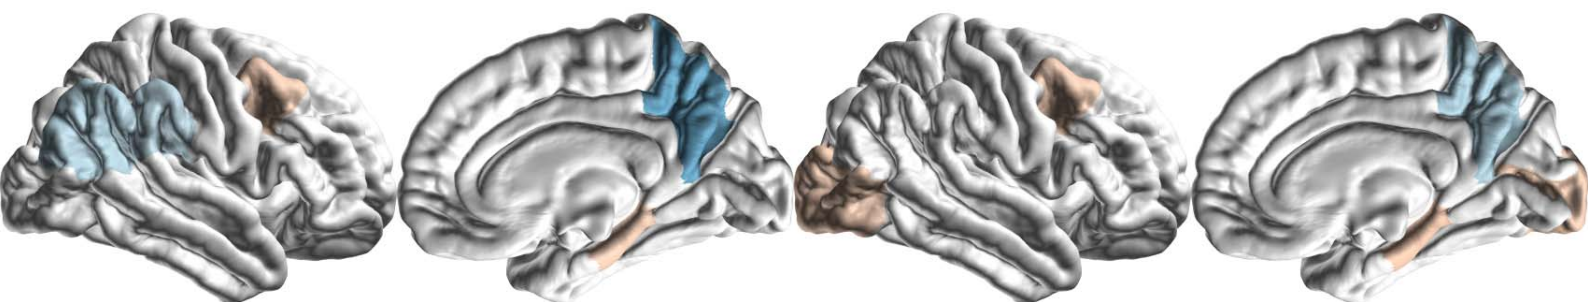

Zscore of the effect allele: T



# Precuneus SA: rs905124

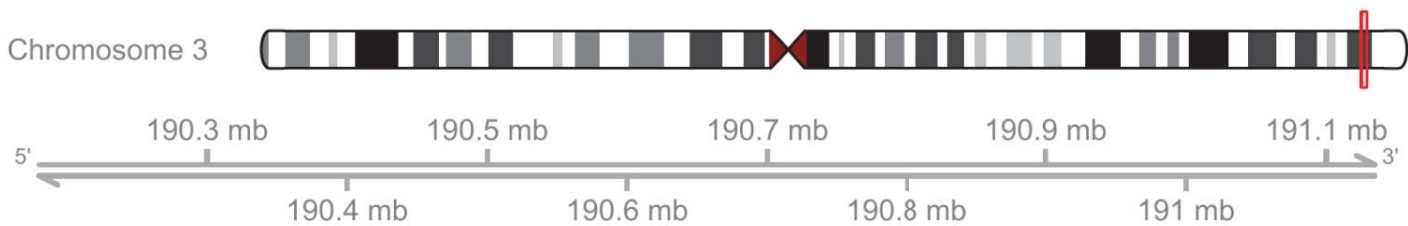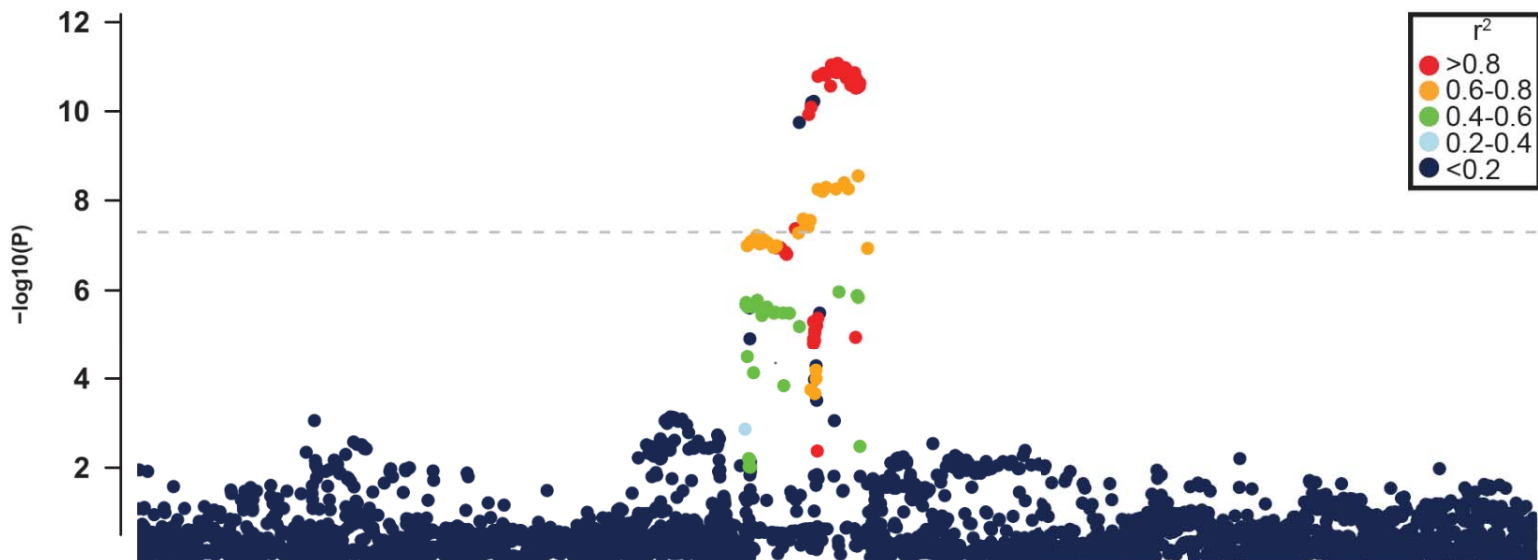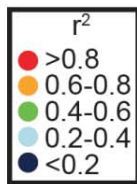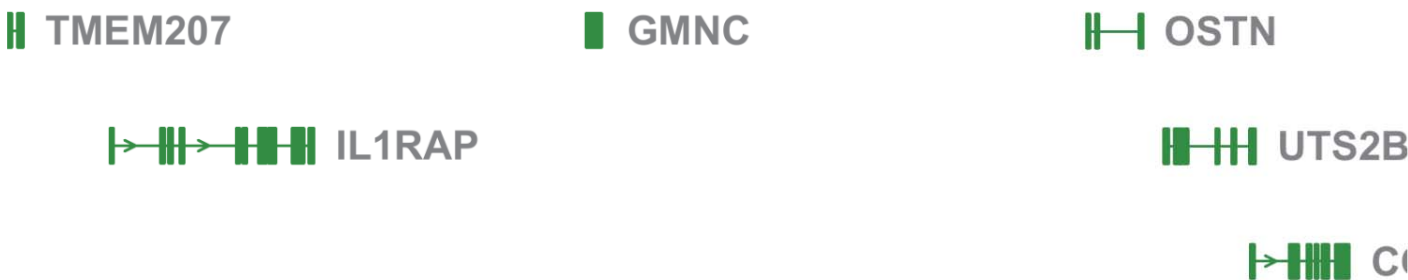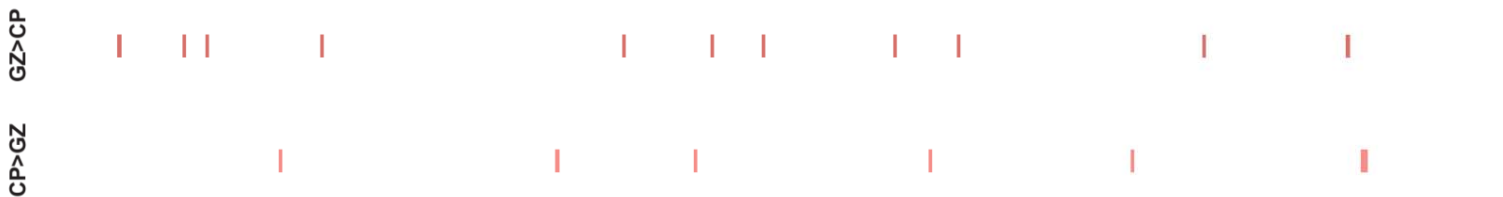

Corrected for total SA

Uncorrected

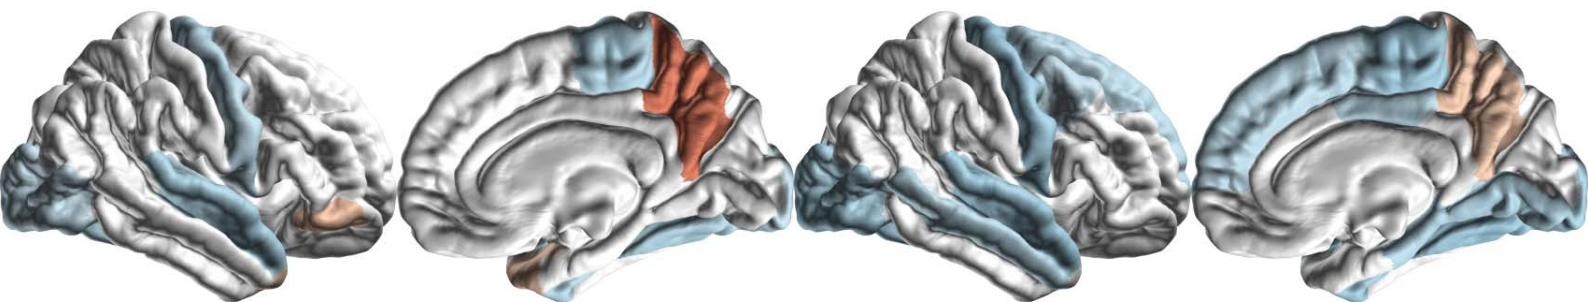

Zscore of the effect allele: A





# Precuneus SA: rs888814

Chromosome 5

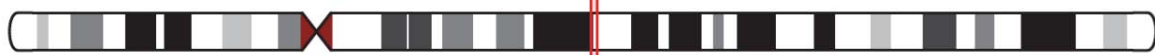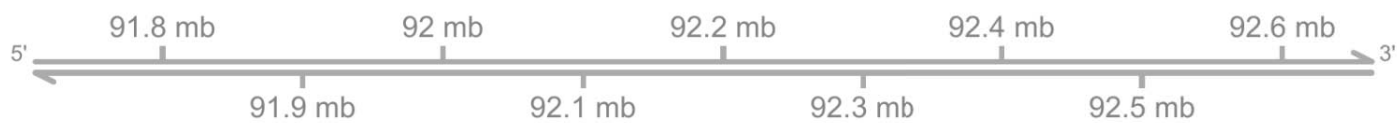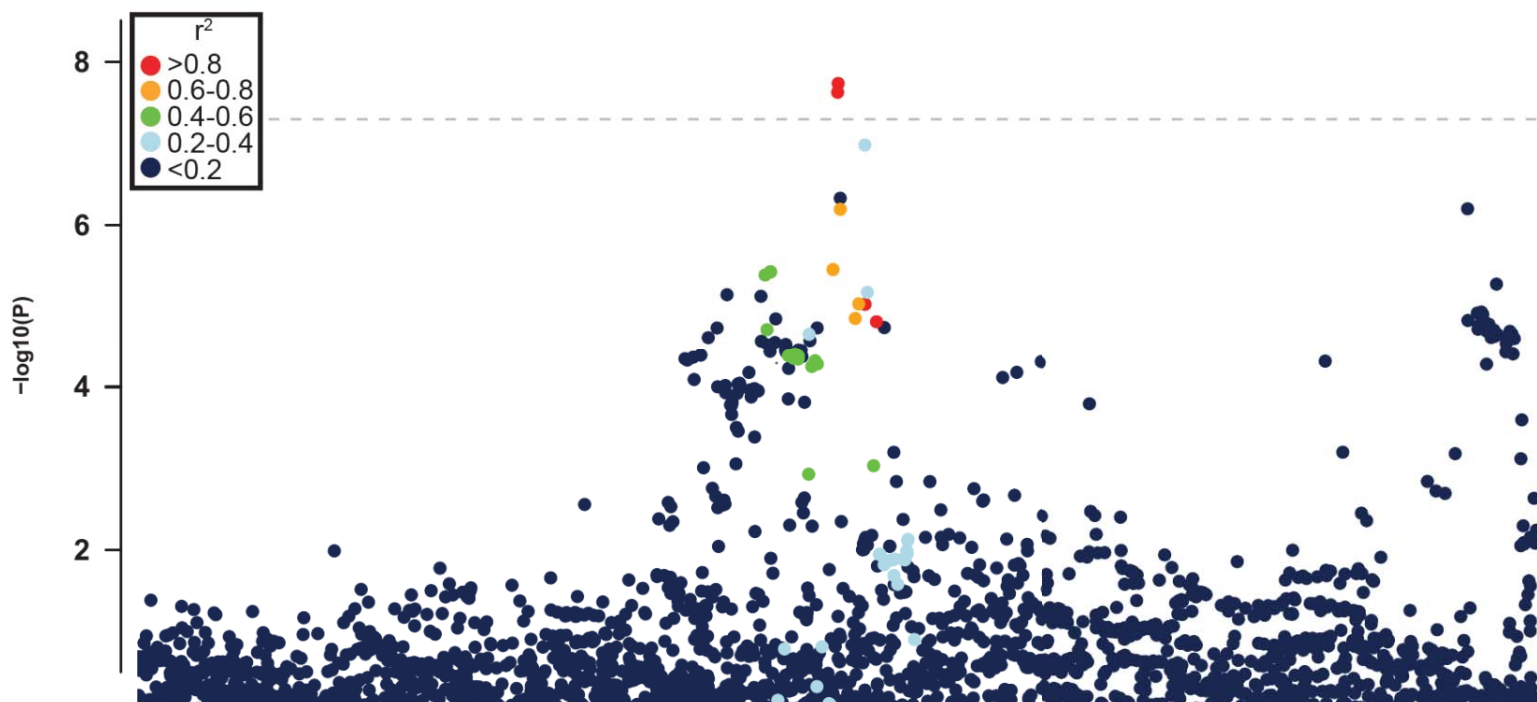

GZ>CP

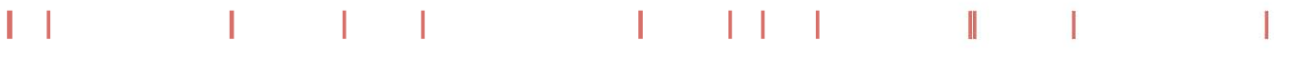

CP>GZ

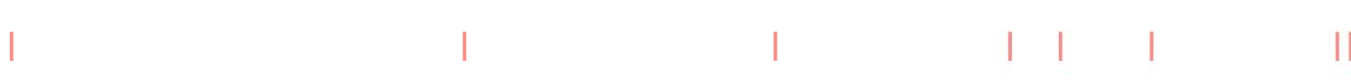

Corrected for total SA

Uncorrected

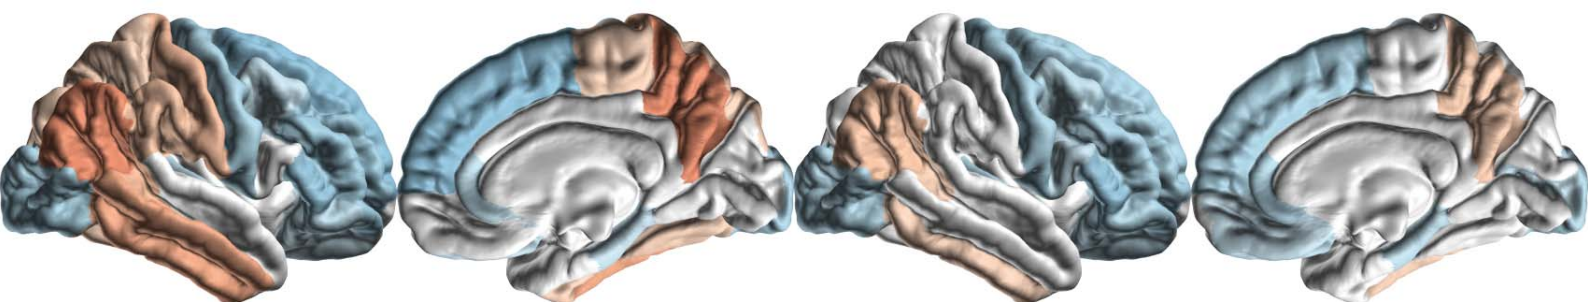

Zscore of the effect allele: T

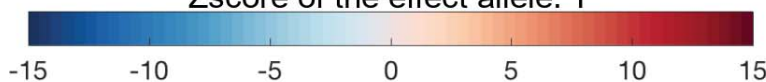

# Precuneus SA: rs9399245

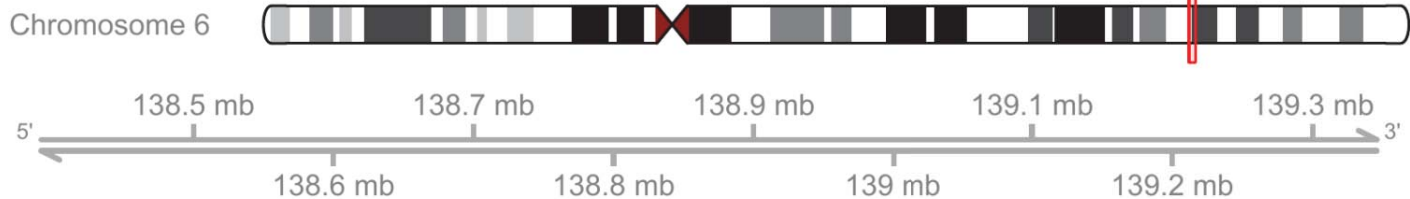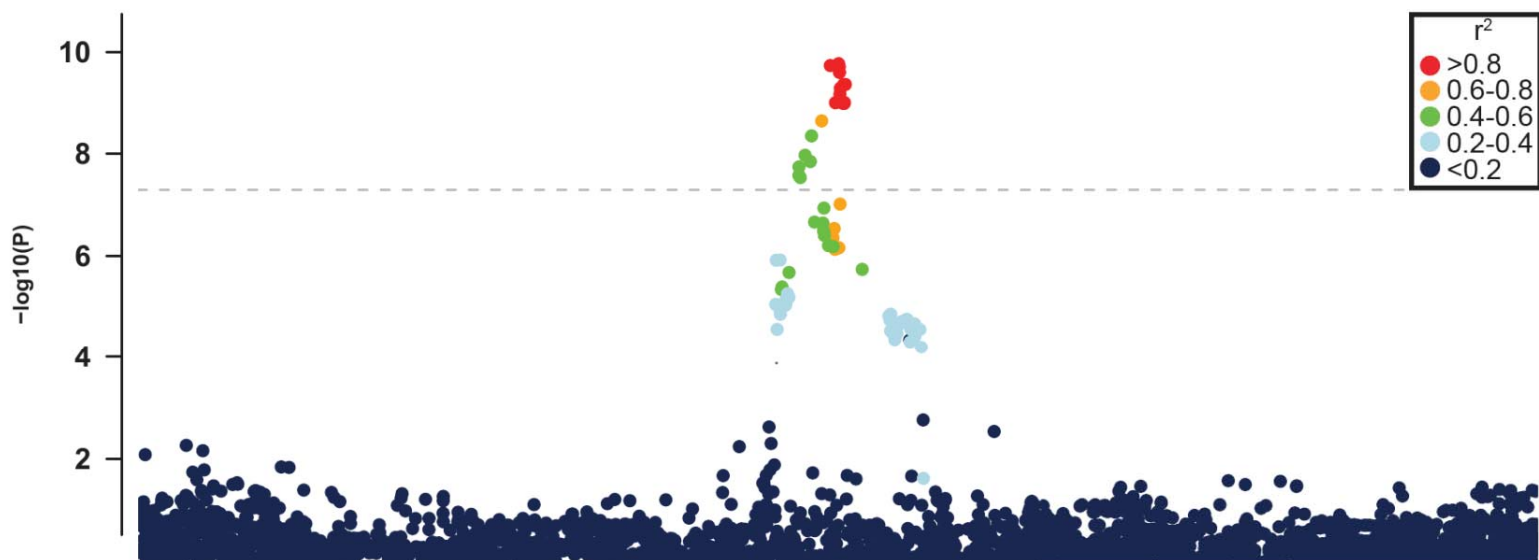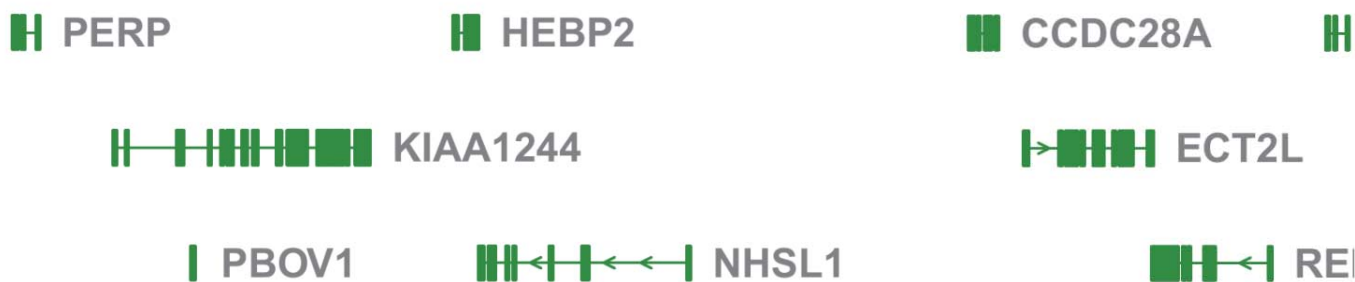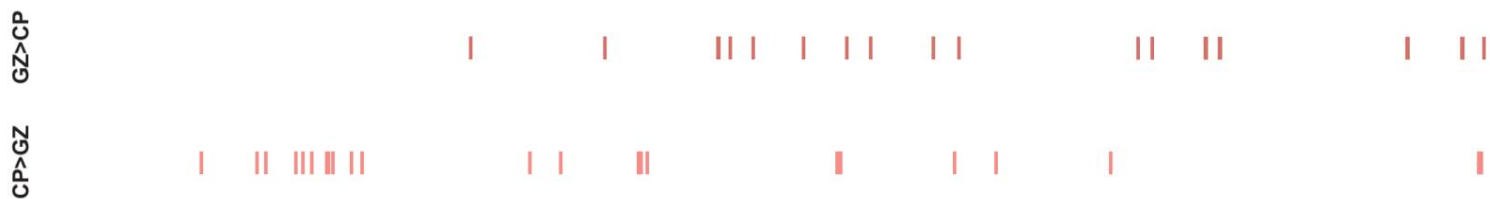

Corrected for total SA

Uncorrected

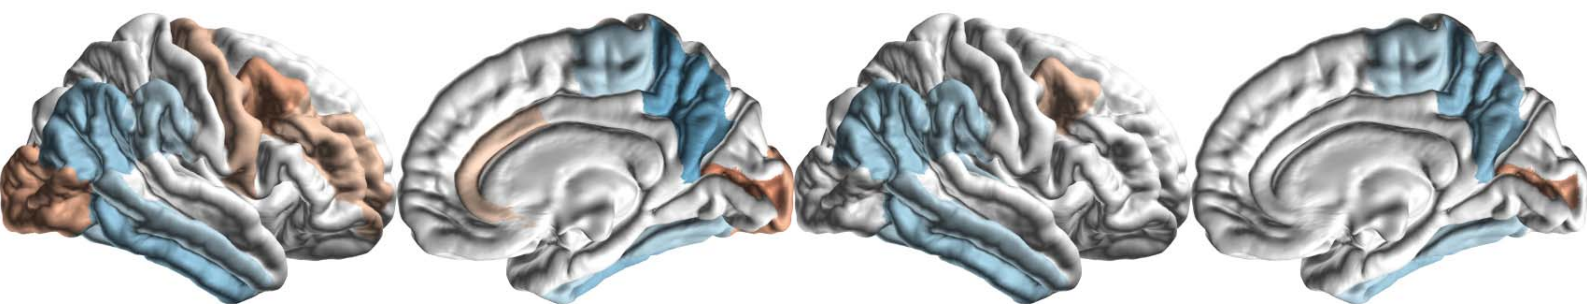

Zscore of the effect allele: T

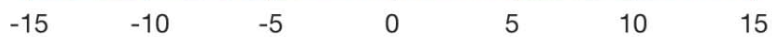

### Precuneus SA: rs7902527

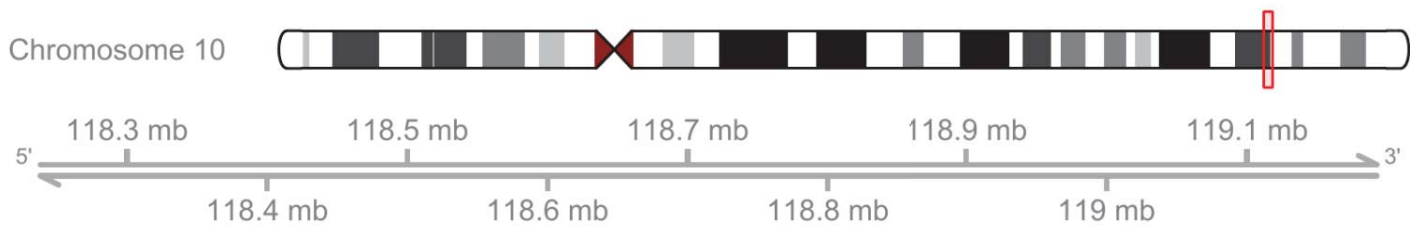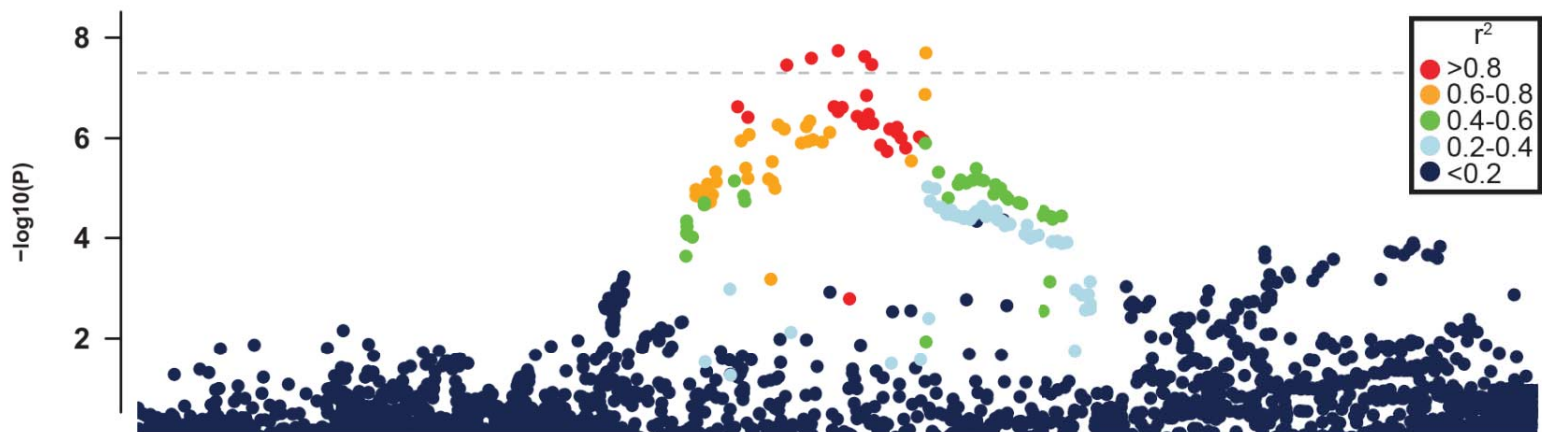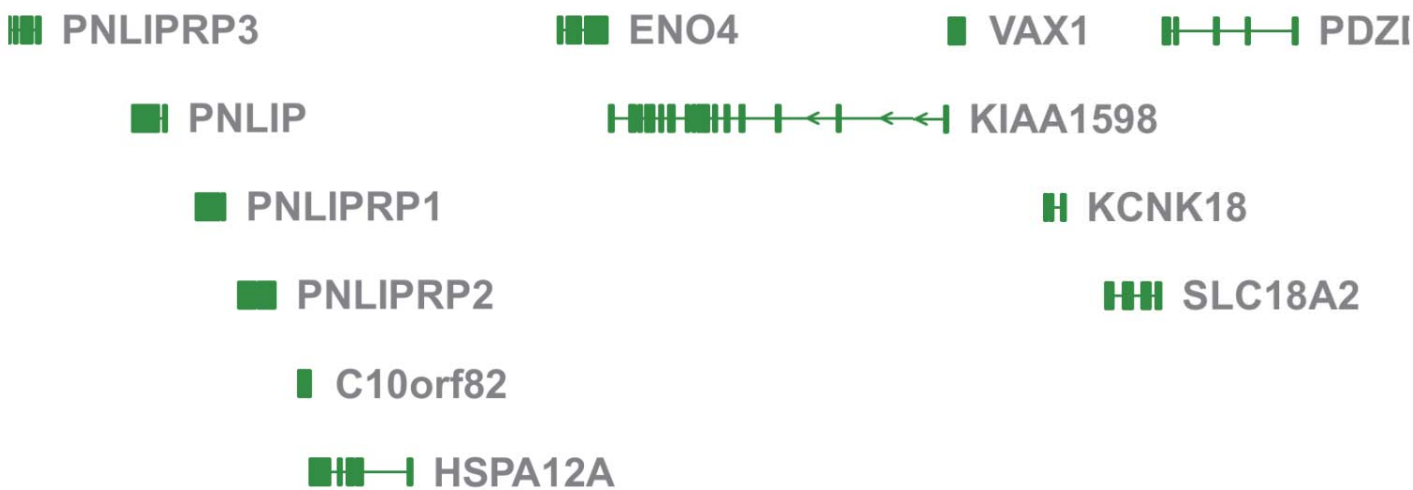

CP>GZ GZ>CP

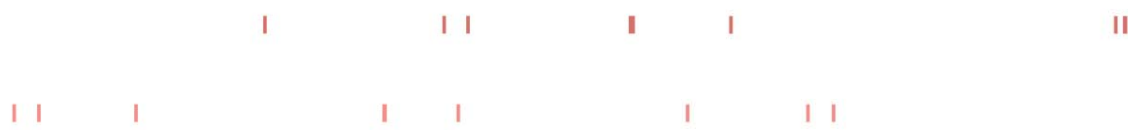

Corrected for total SA

Uncorrected

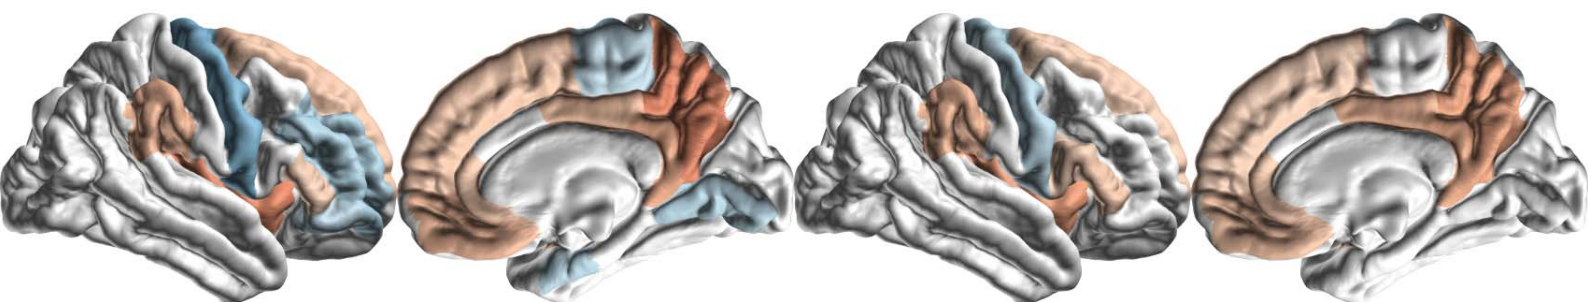

Zscore of the effect allele: A





# Precuneus SA: rs73313052

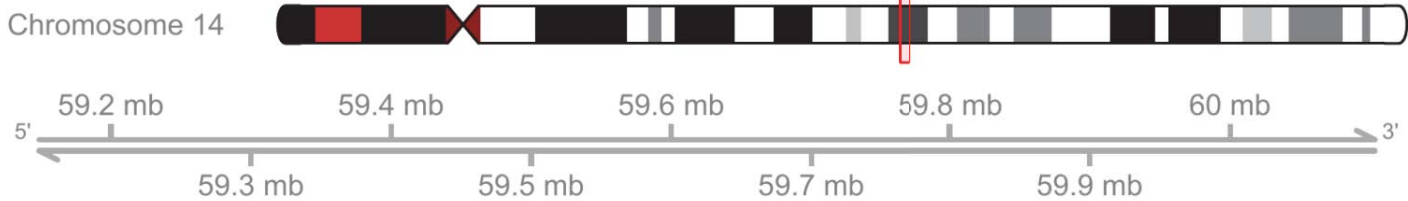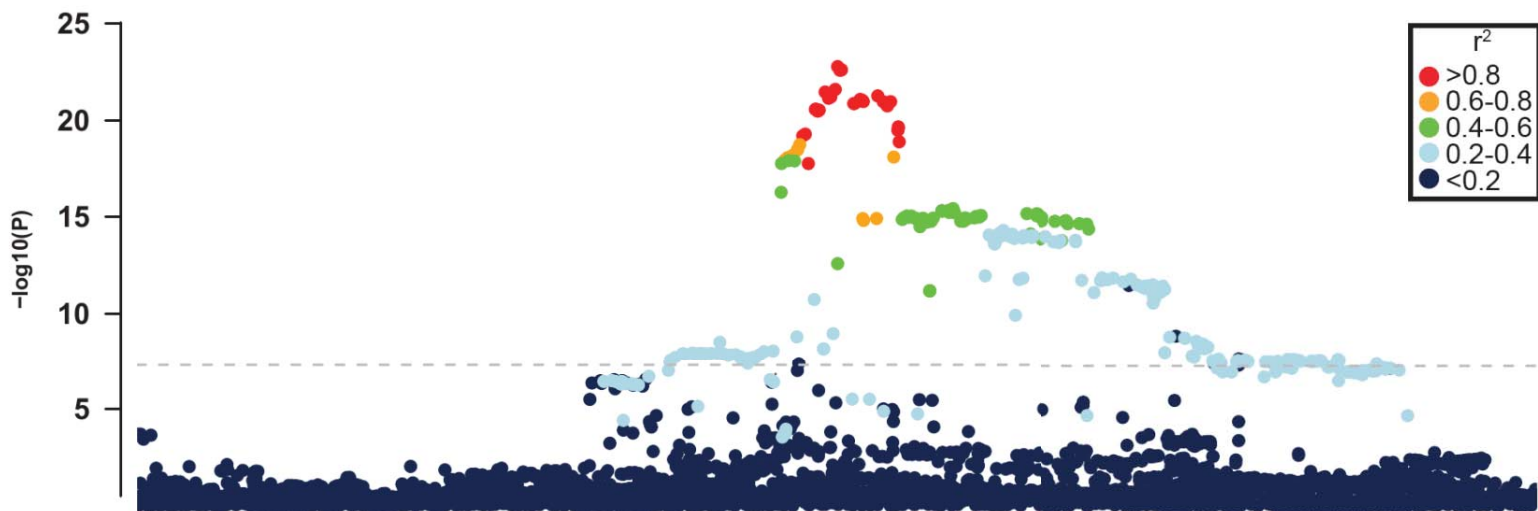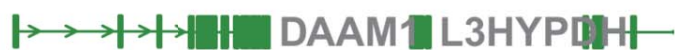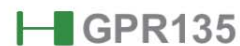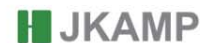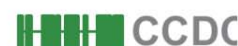

CP>GZ  
GZ>CP

Corrected for total SA

Uncorrected

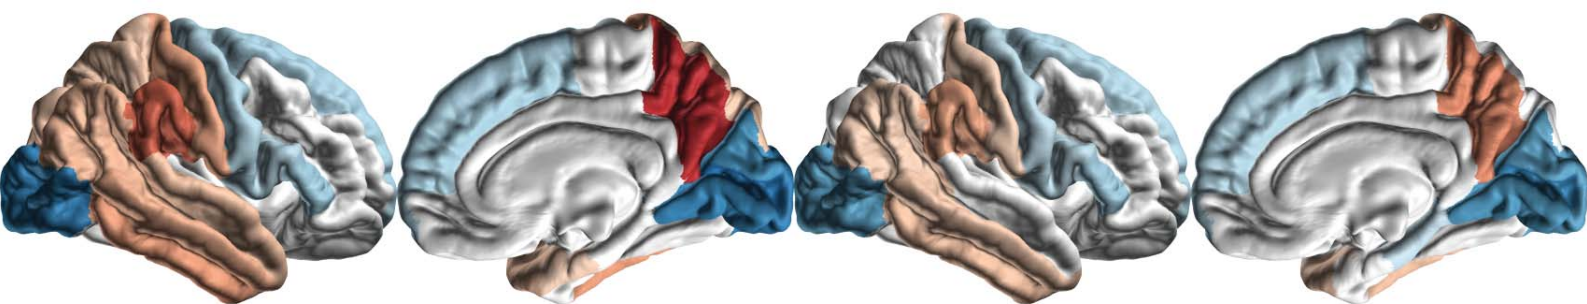

Zscore of the effect allele: A



# Precuneus TH: rs12118339

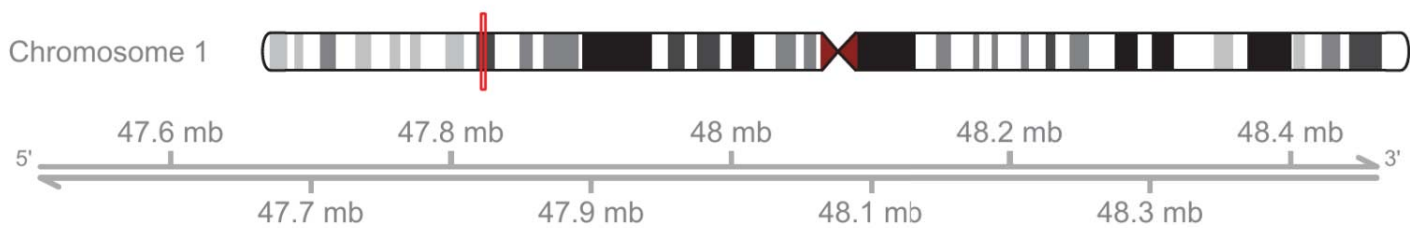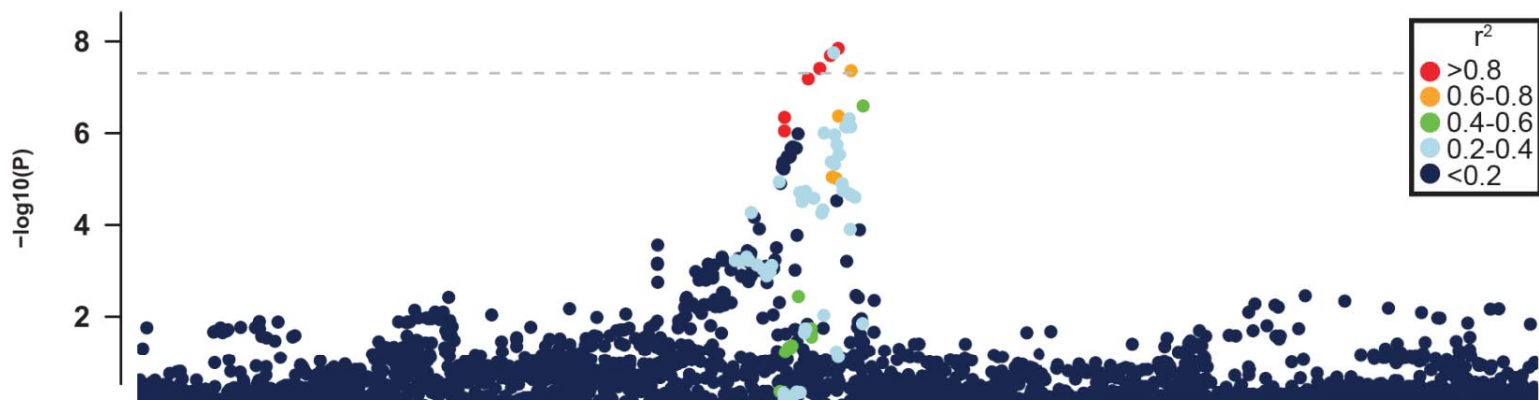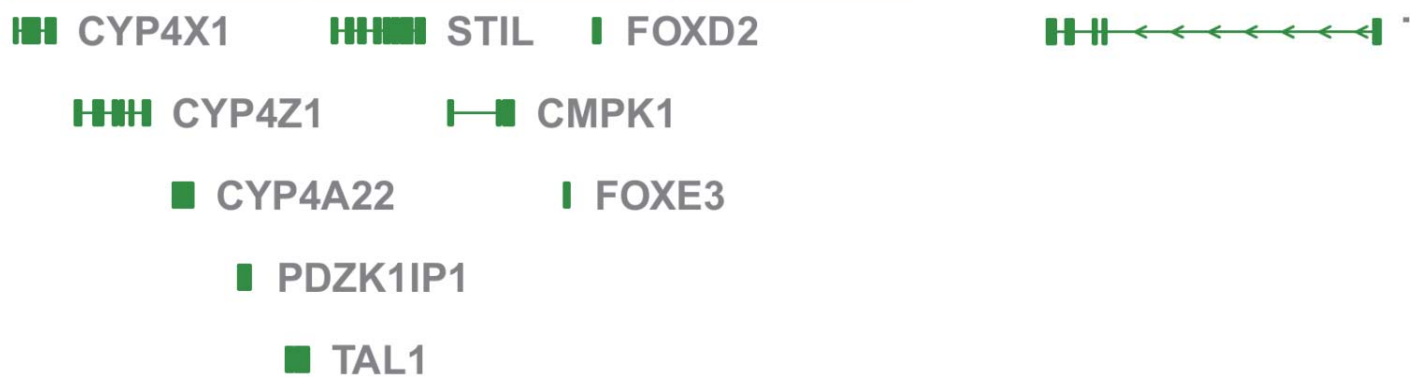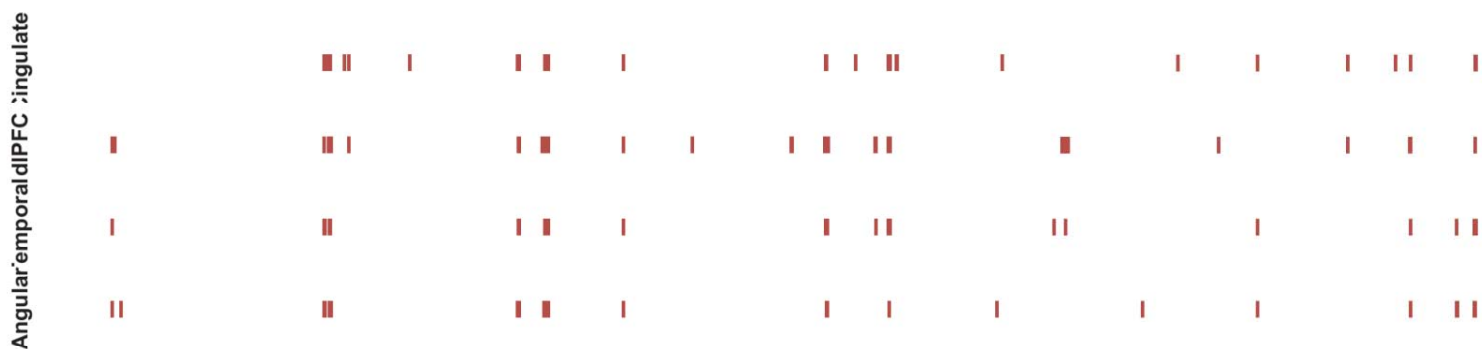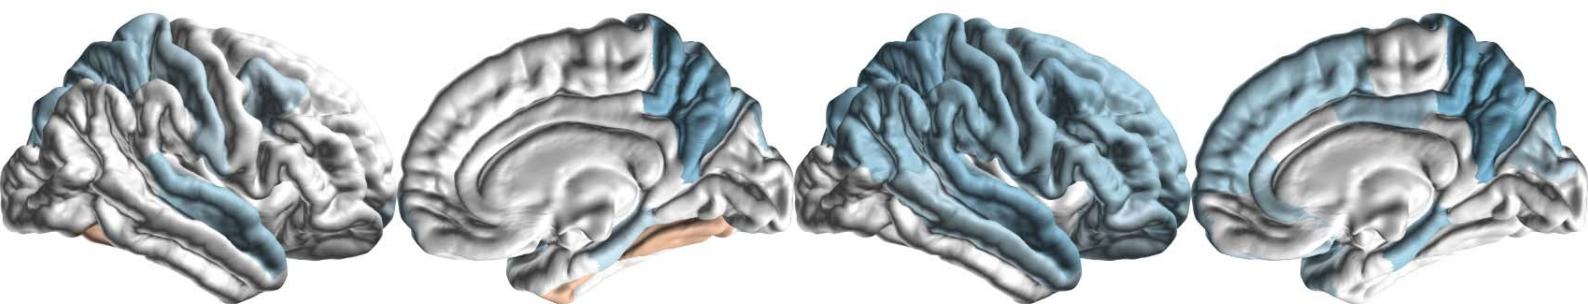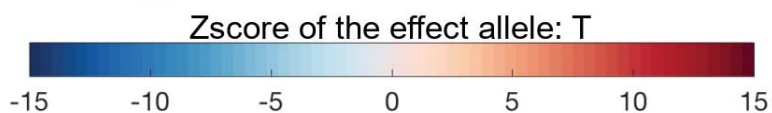

# Superior Parietal SA: rs639016

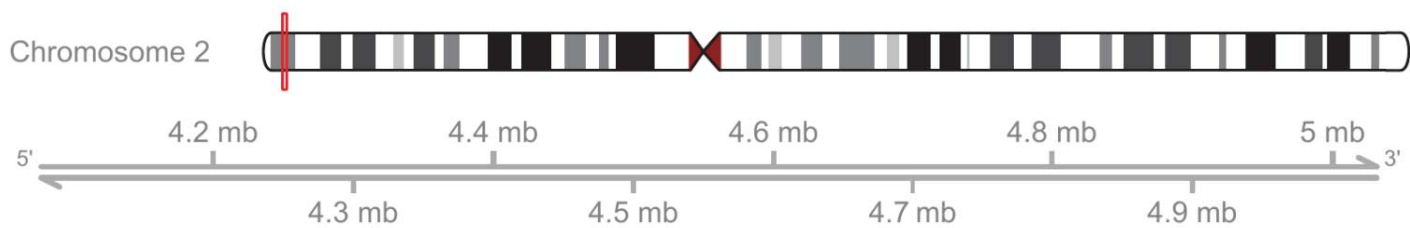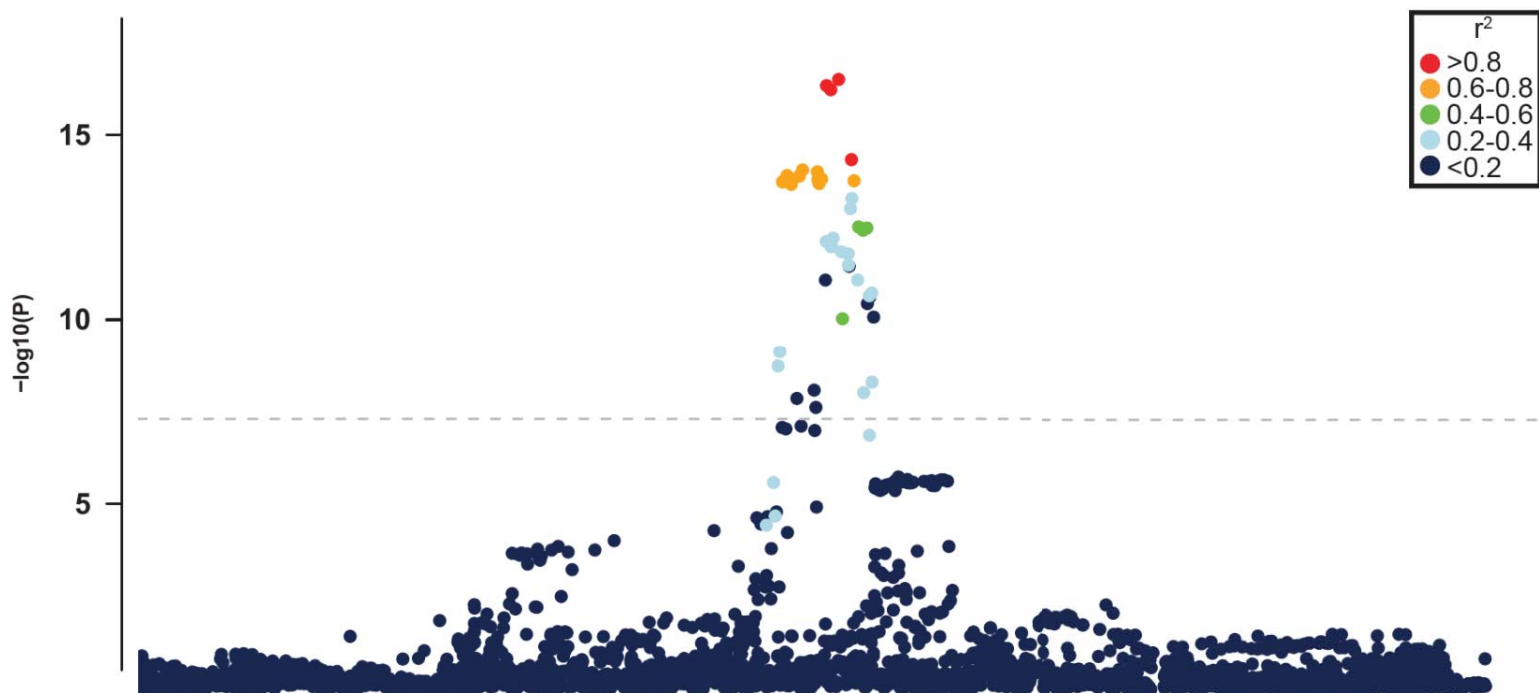

GZ>CP

CP>GZ

Corrected for total SA

Uncorrected

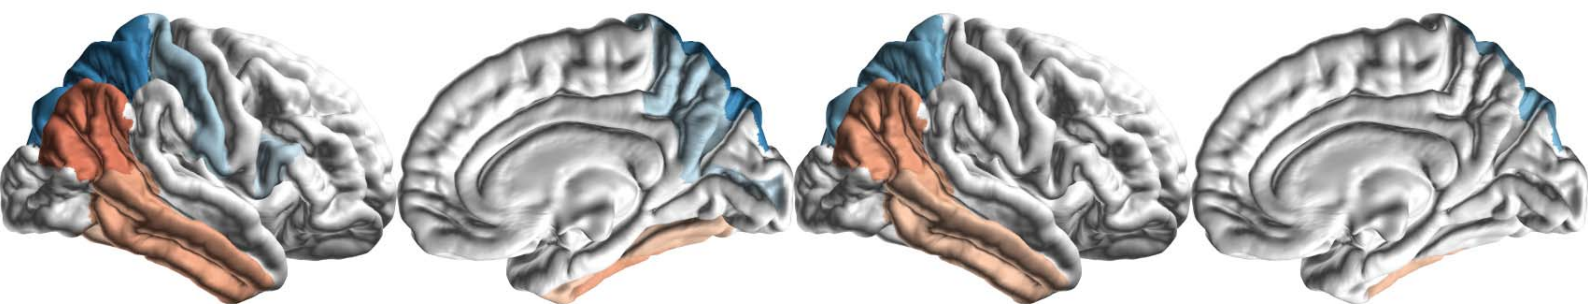

Zscore of the effect allele: C

-15 -10 -5 0 5 10 15



# Superior Parietal SA: rs79272390

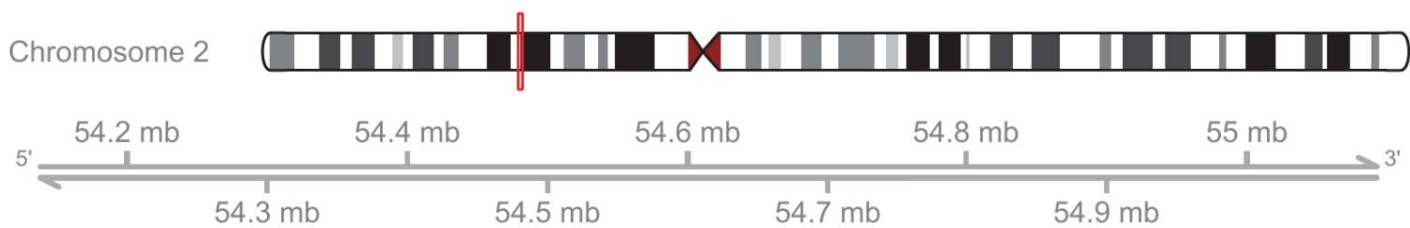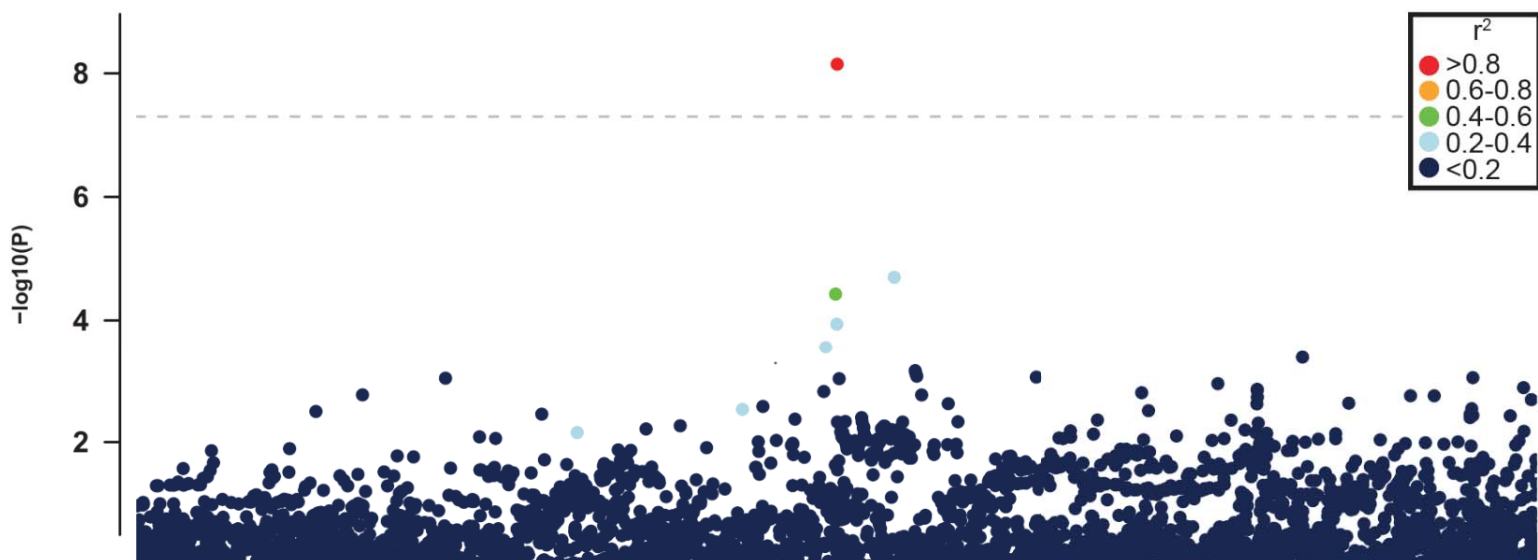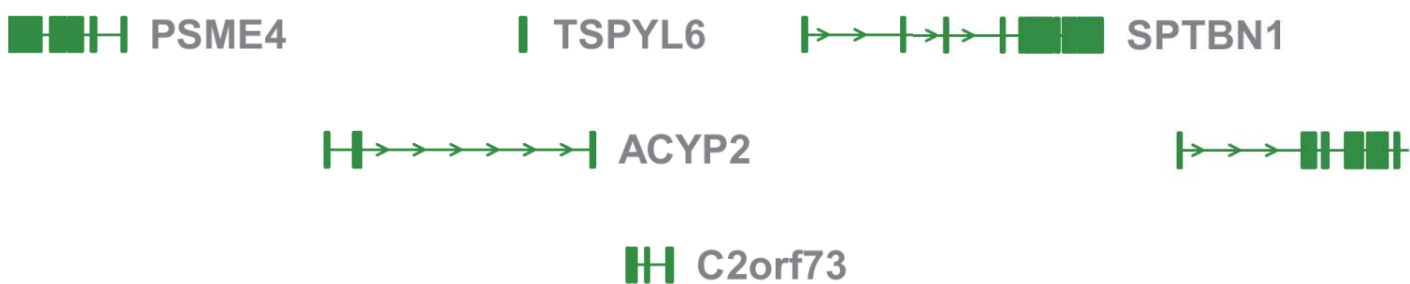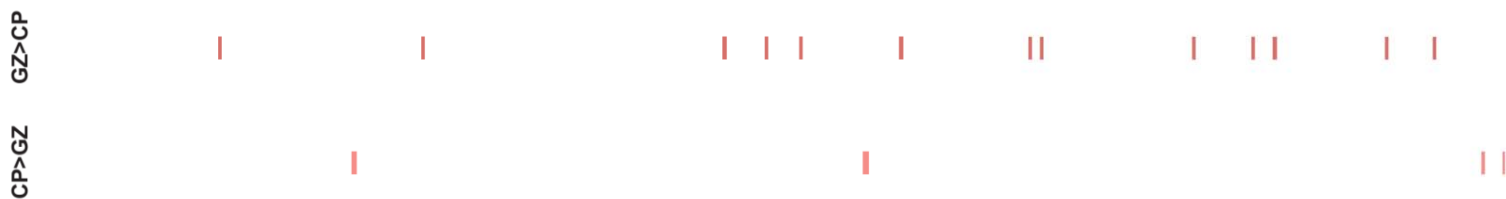

Corrected for total SA

Uncorrected

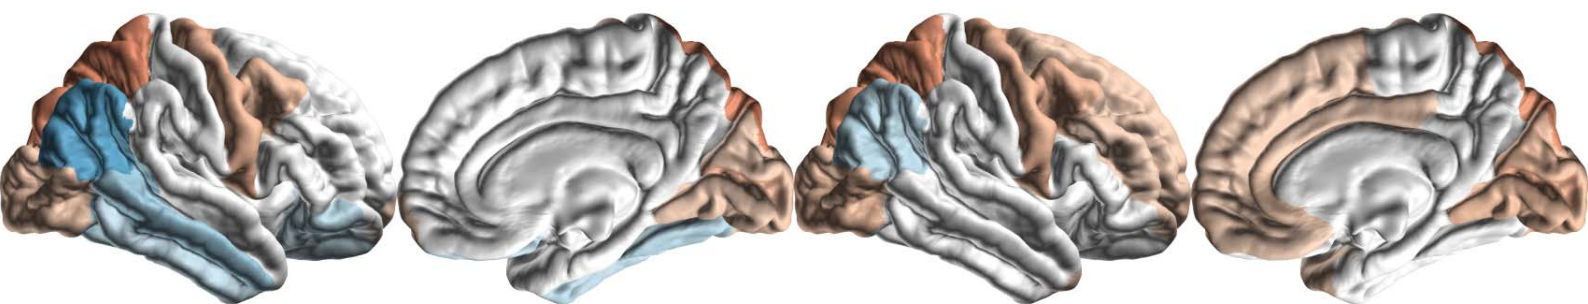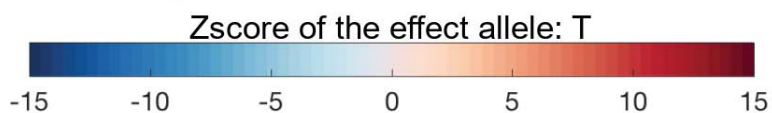

# Superior Parietal SA: rs17718831

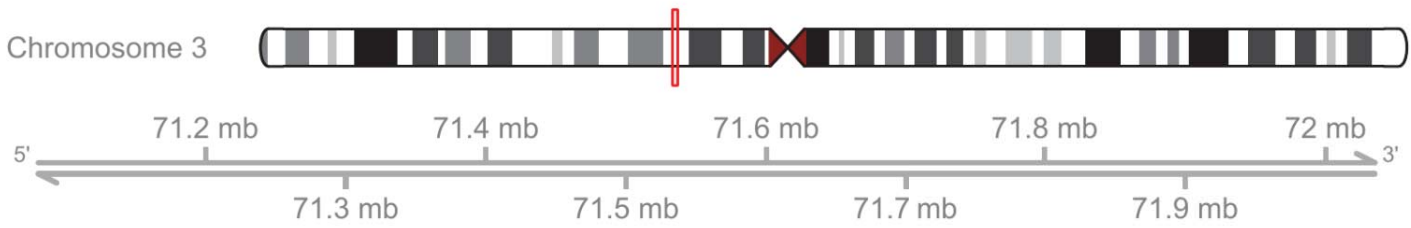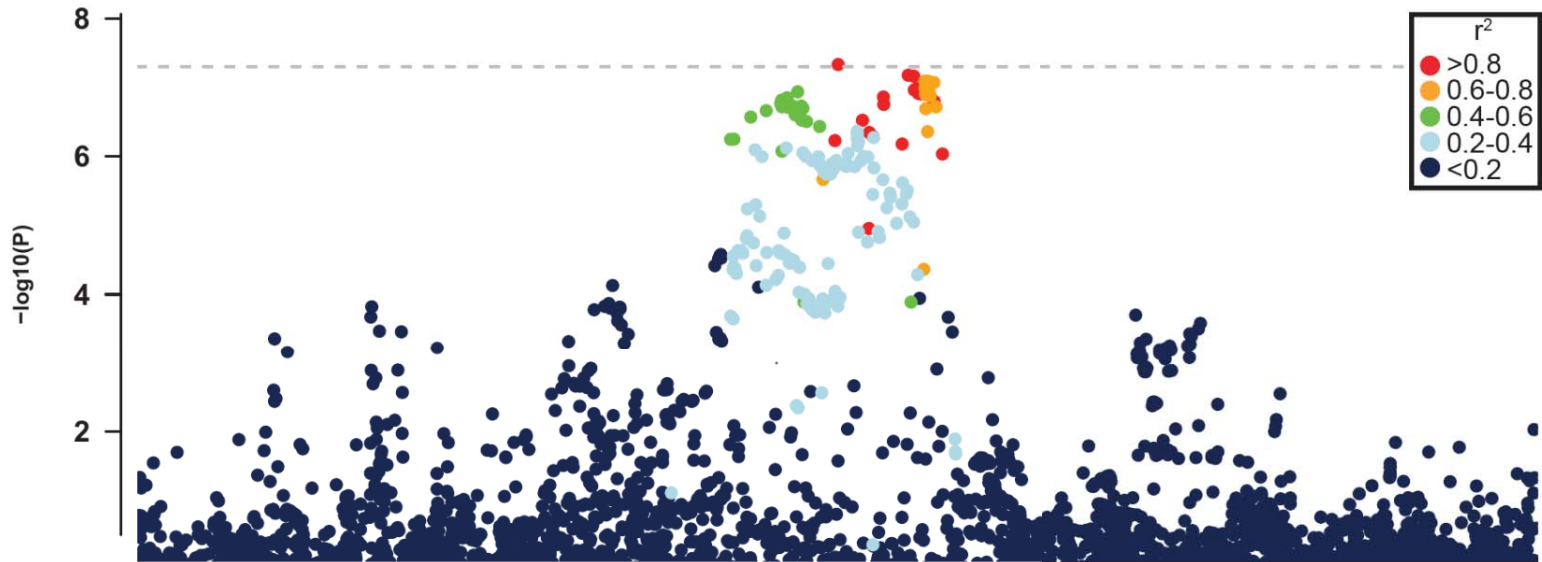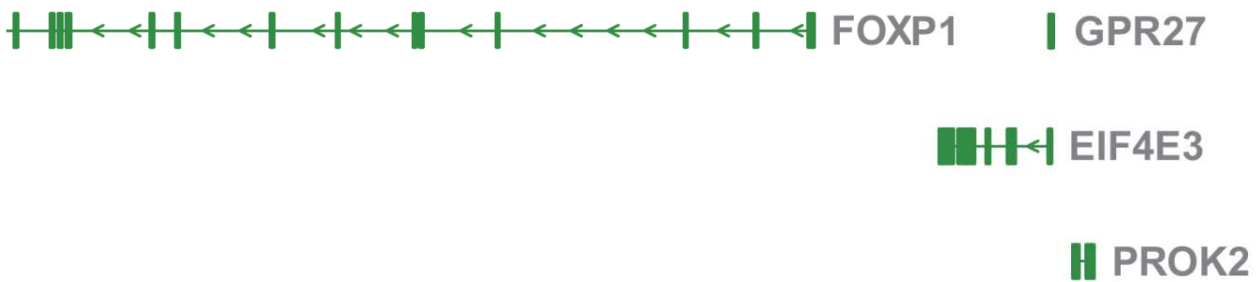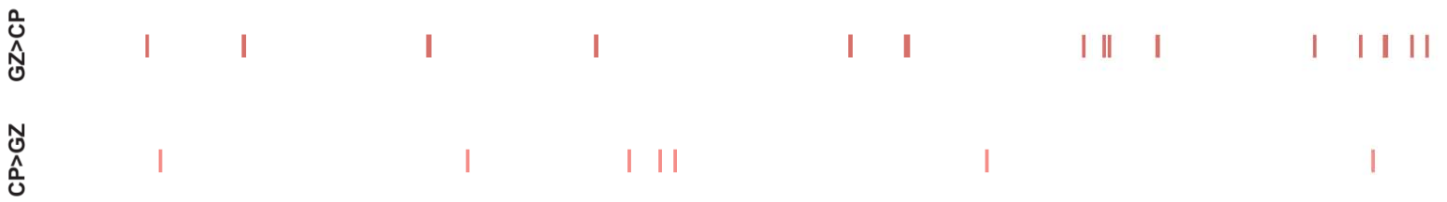

Corrected for total SA

Uncorrected

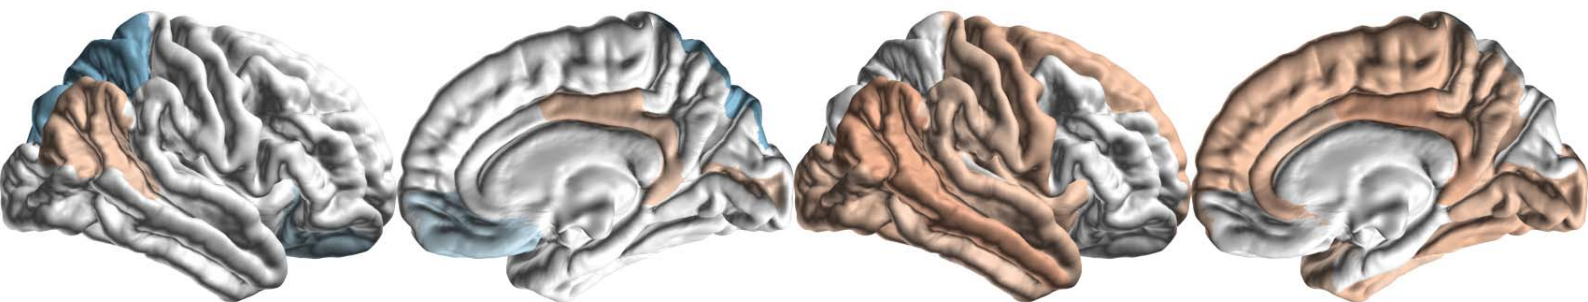

Zscore of the effect allele: A



# Superior Parietal SA: rs6554054

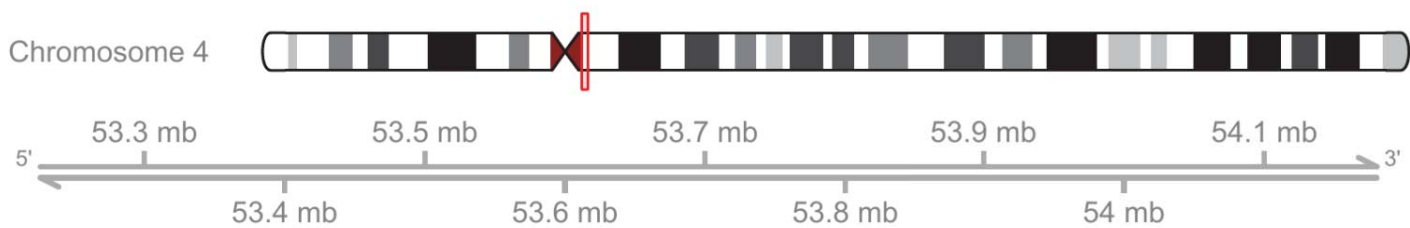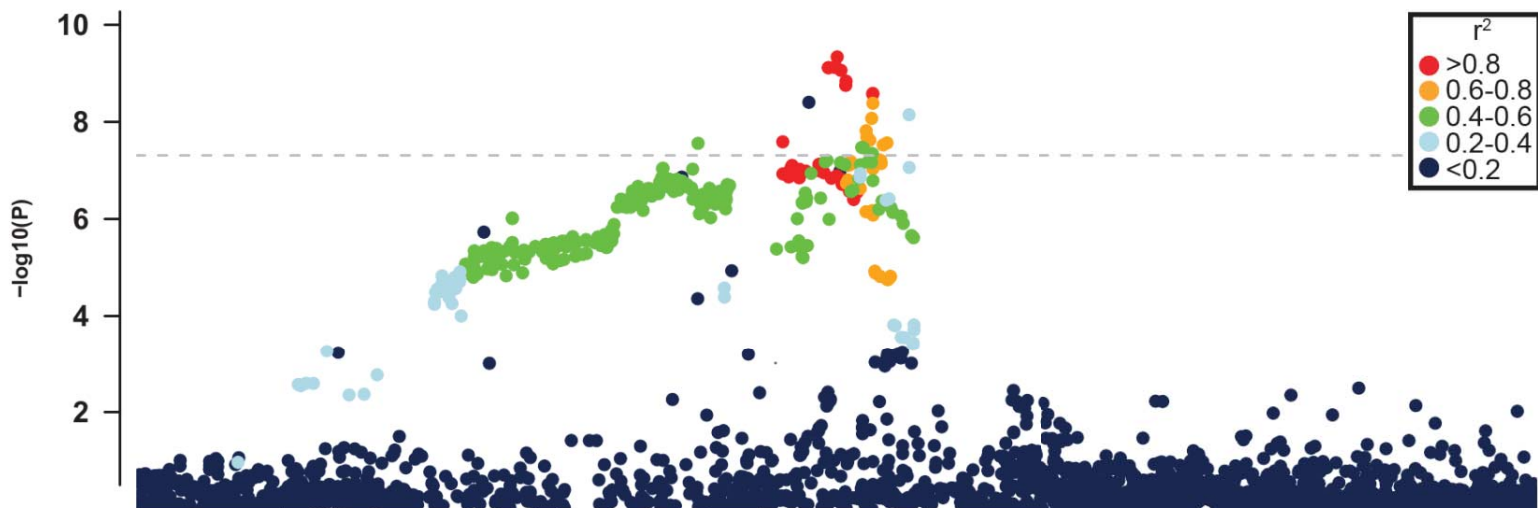

USP46 RASL11B

SNORA26

ERVMER34-1

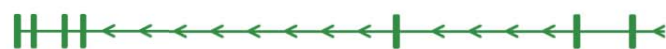

CP>GZ GZ>CP

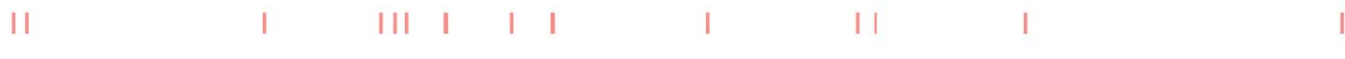

Corrected for total SA

Uncorrected

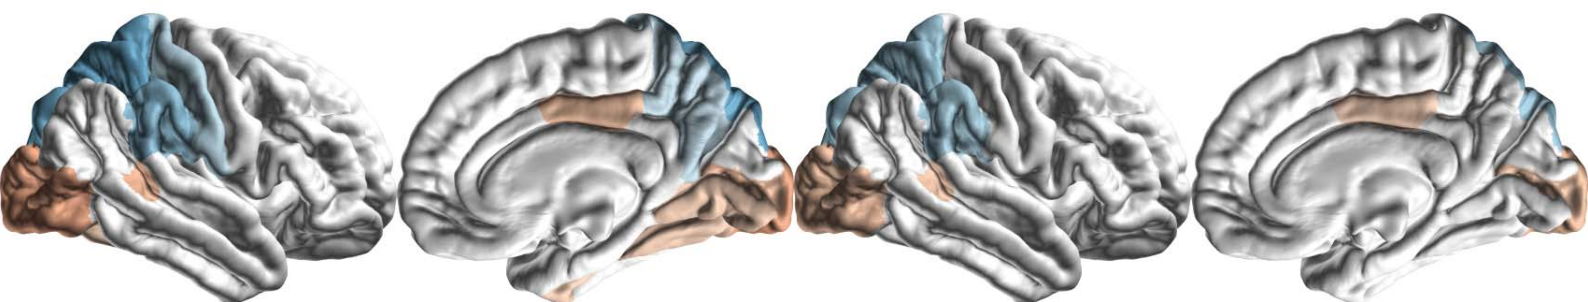

Zscore of the effect allele: A





# Superior Parietal SA: rs6840242

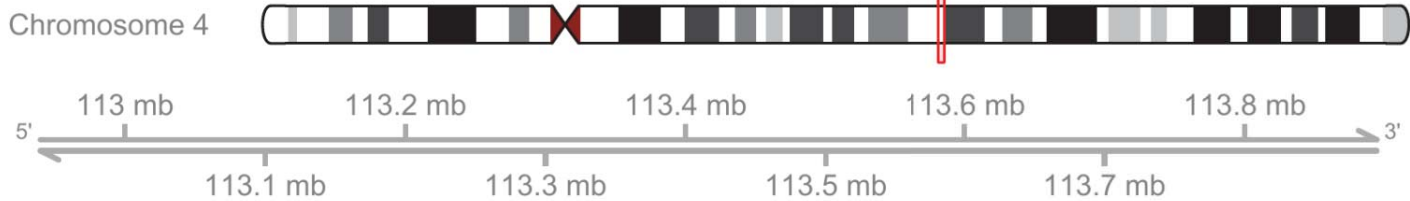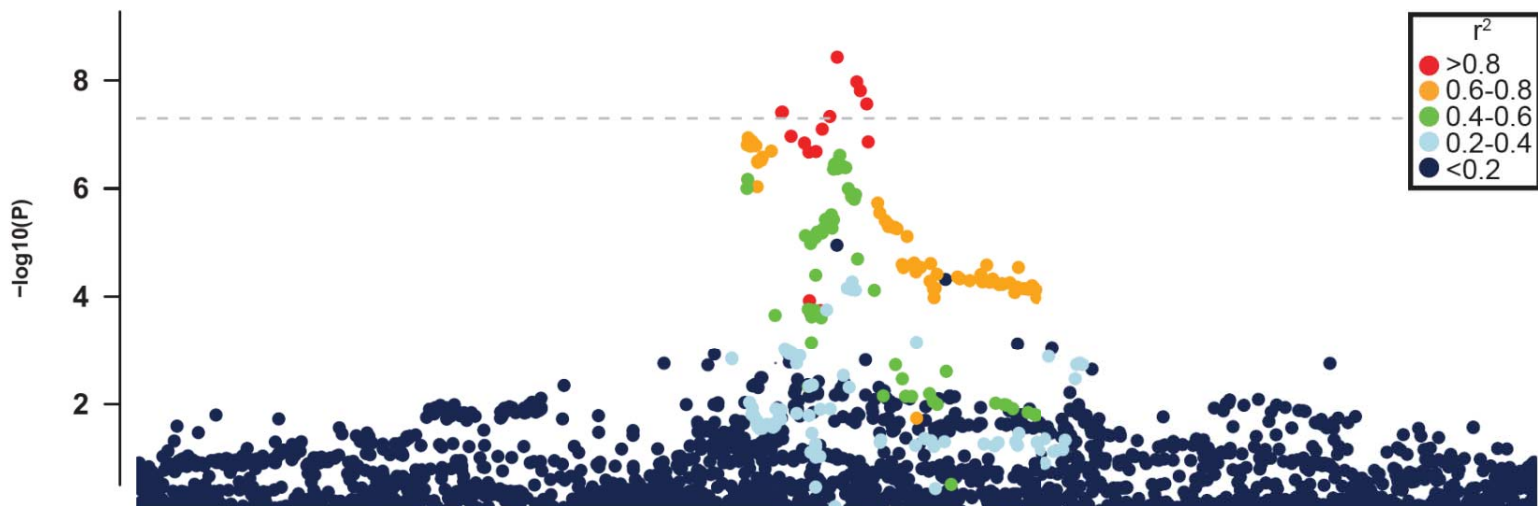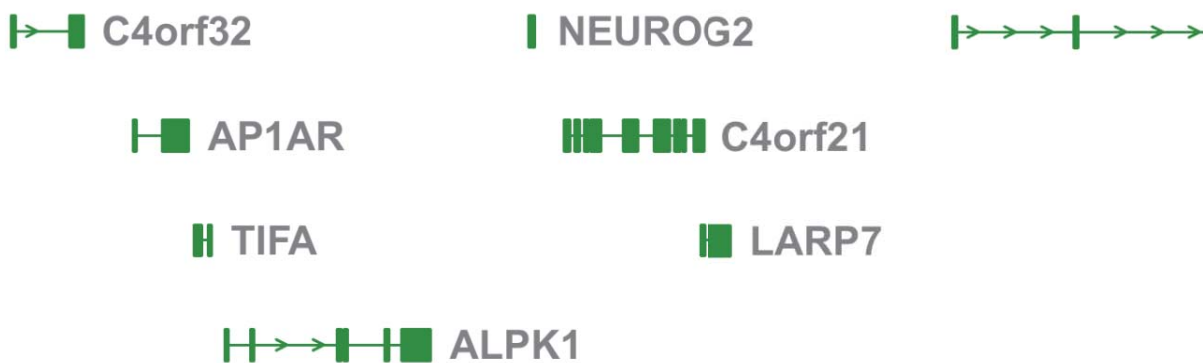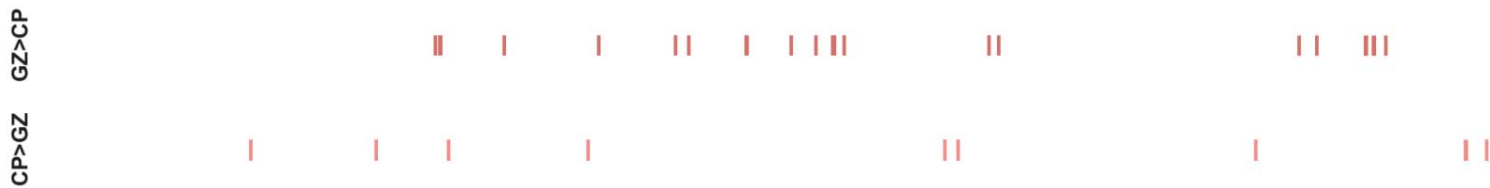

Corrected for total SA

Uncorrected

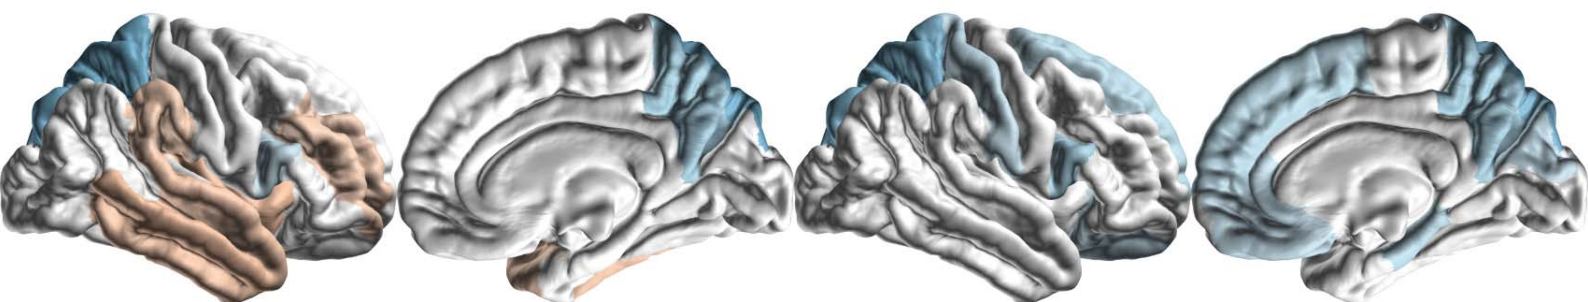

Zscore of the effect allele: T



# Superior Parietal SA: rs40084

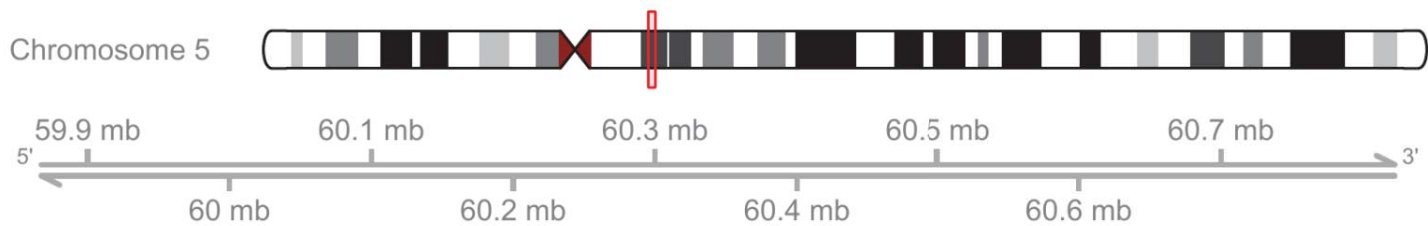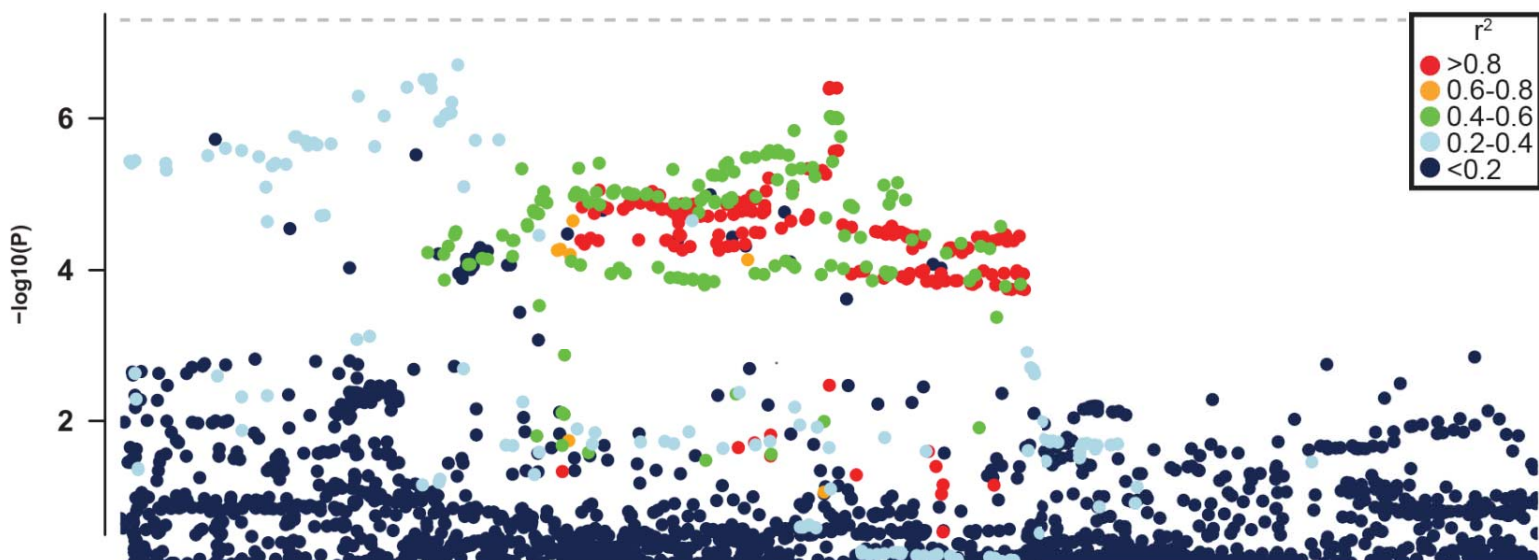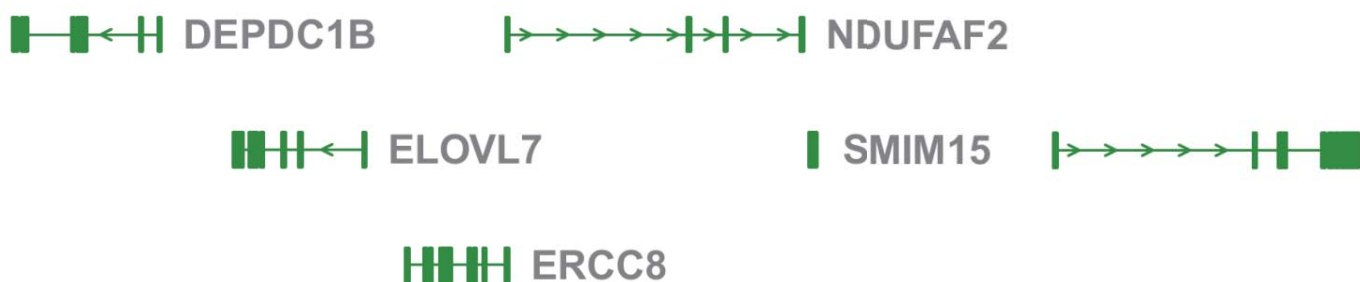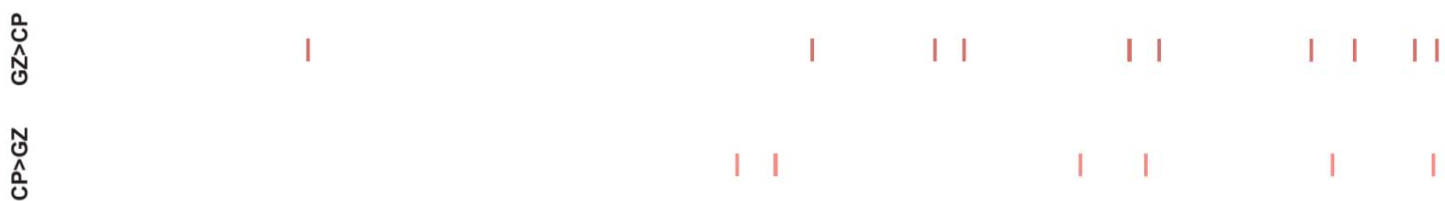

Corrected for total SA

Uncorrected

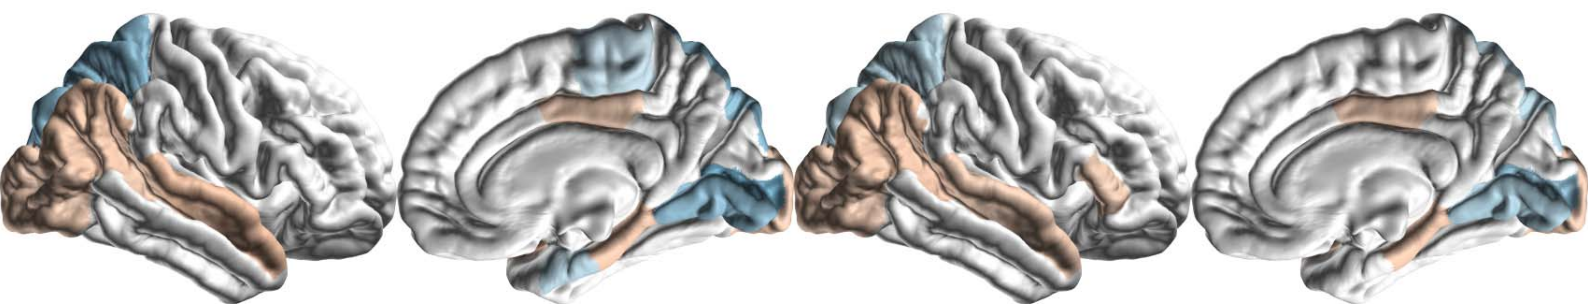

Zscore of the effect allele: T



# Superior Parietal SA: rs115877304

Chromosome 5

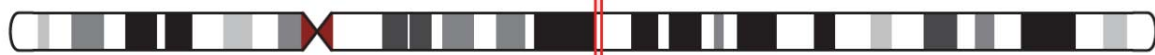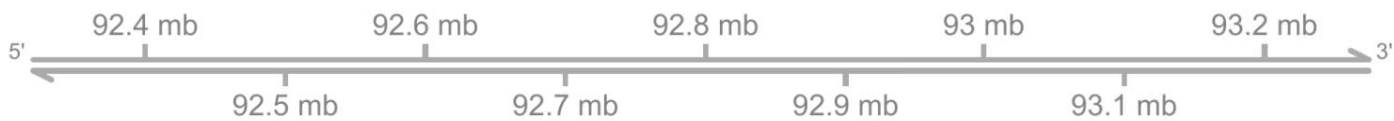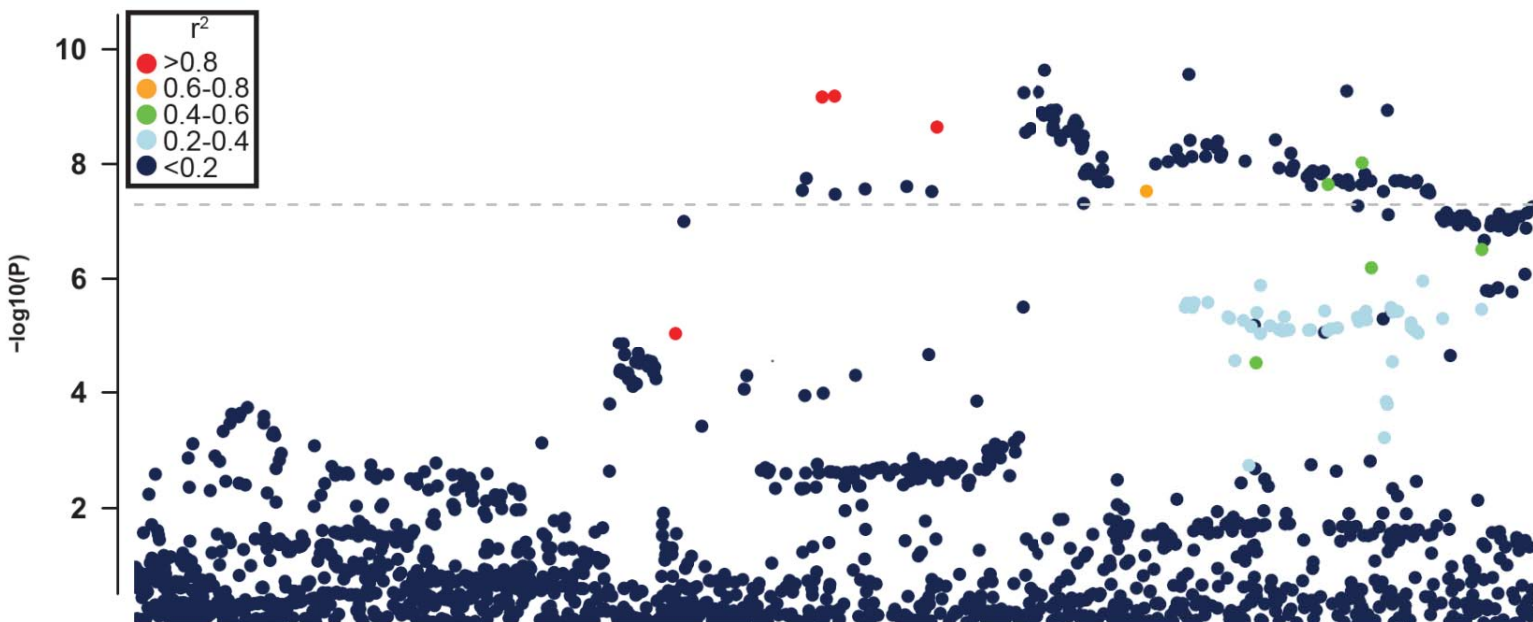

NR2F1 POU5F2

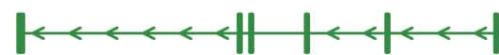

GZ>CP

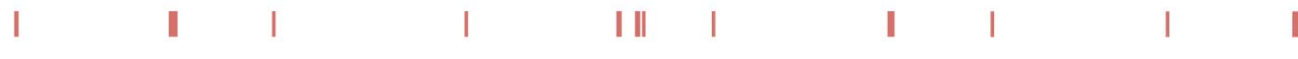

CP>GZ

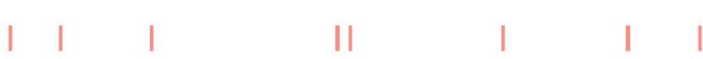

Corrected for total SA

Uncorrected

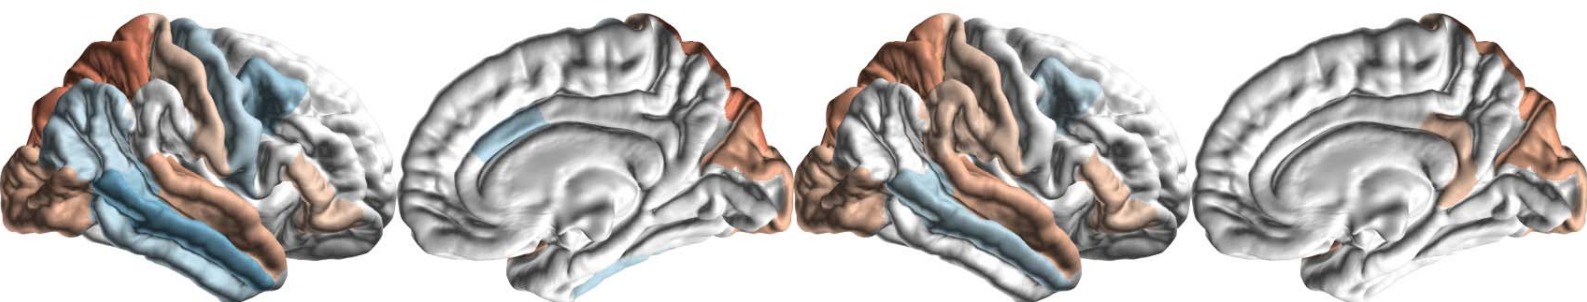

Zscore of the effect allele: T





# Superior Parietal SA: rs114489117

Chromosome 5

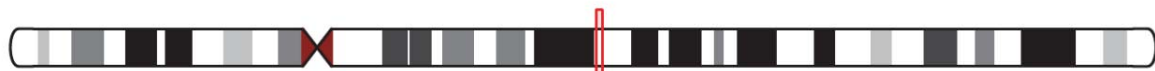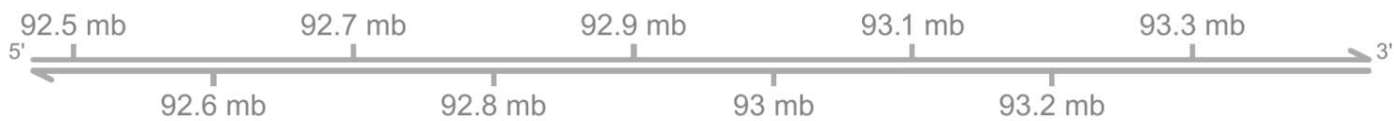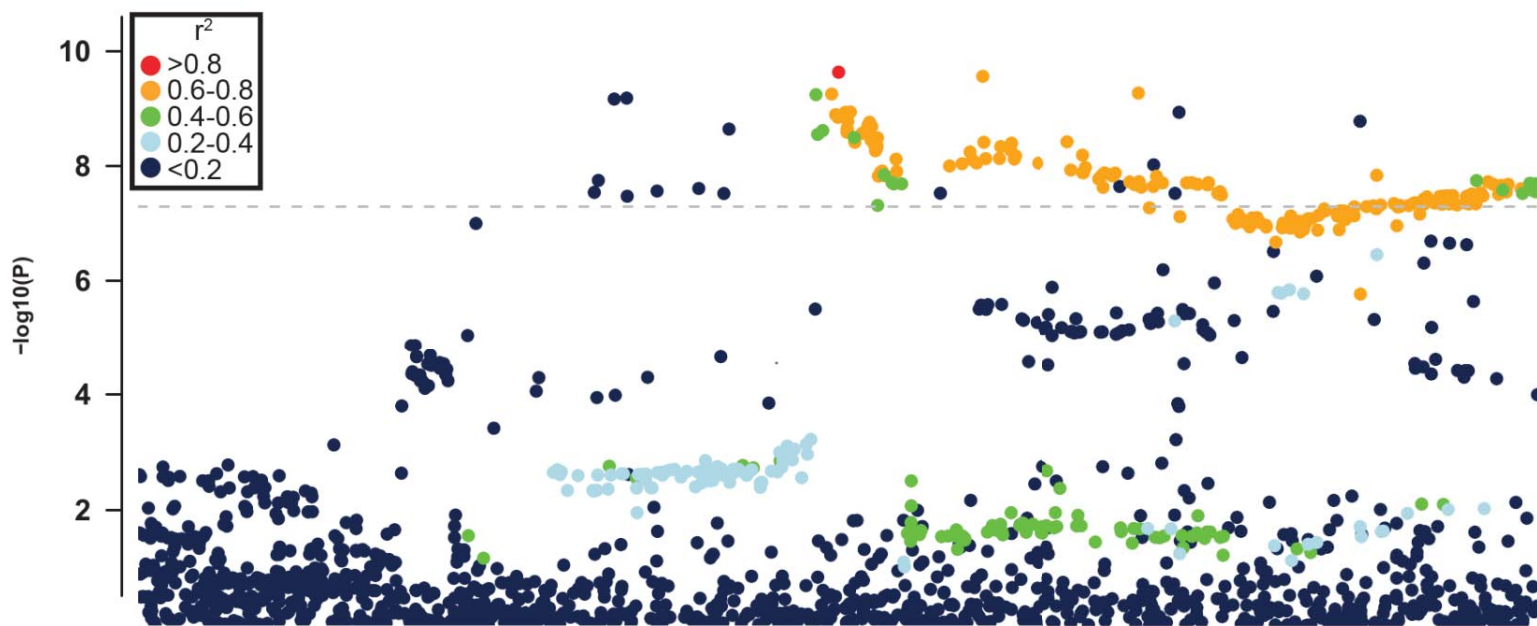

NR2F1 POU5F2

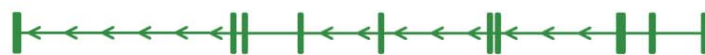

GZ>CP

CP>GZ

Corrected for total SA

Uncorrected

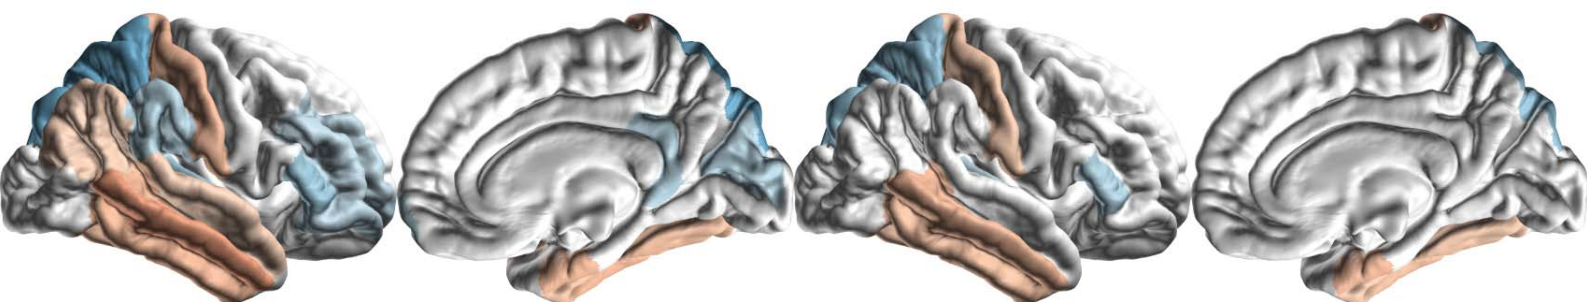

Zscore of the effect allele: A

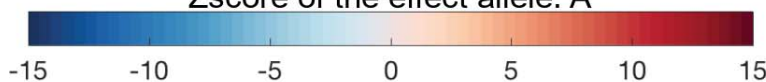

# Superior Parietal SA: rs9345125

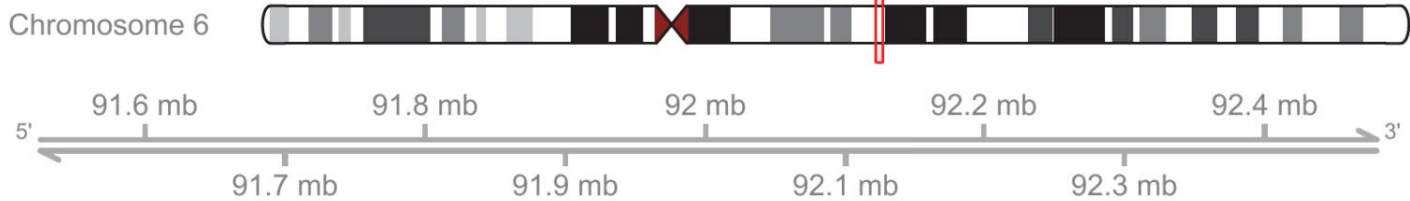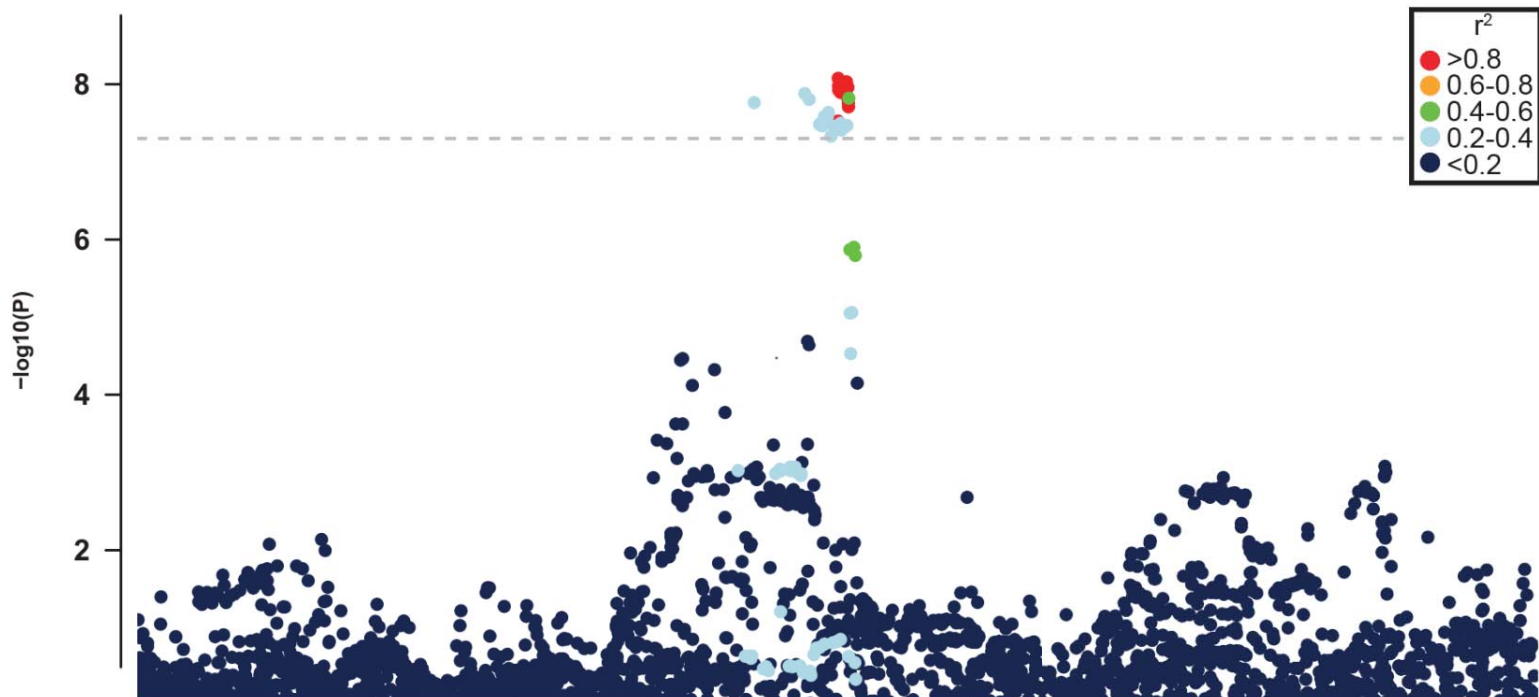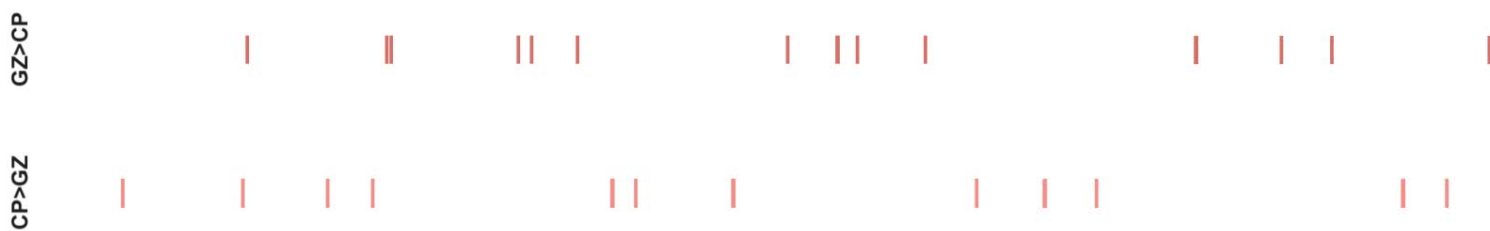

Corrected for total SA

Uncorrected

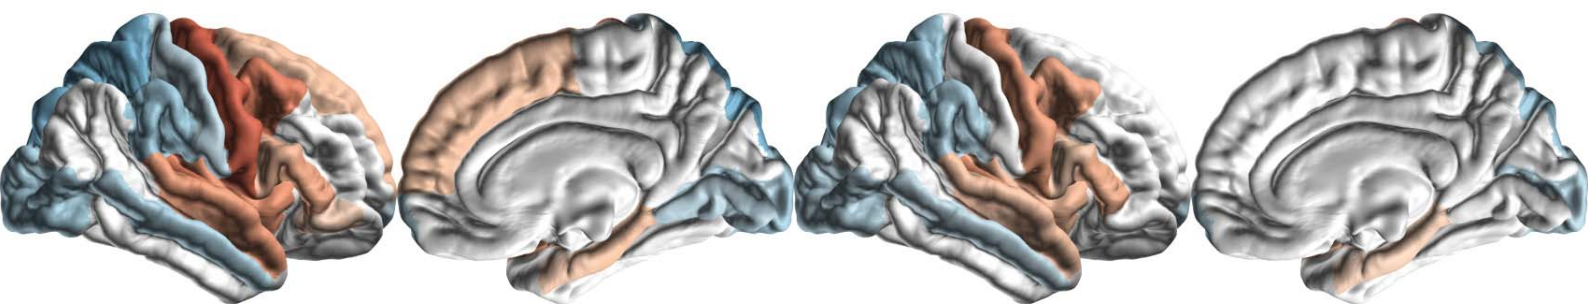

Zscore of the effect allele: A



# Superior Parietal SA: rs10109434

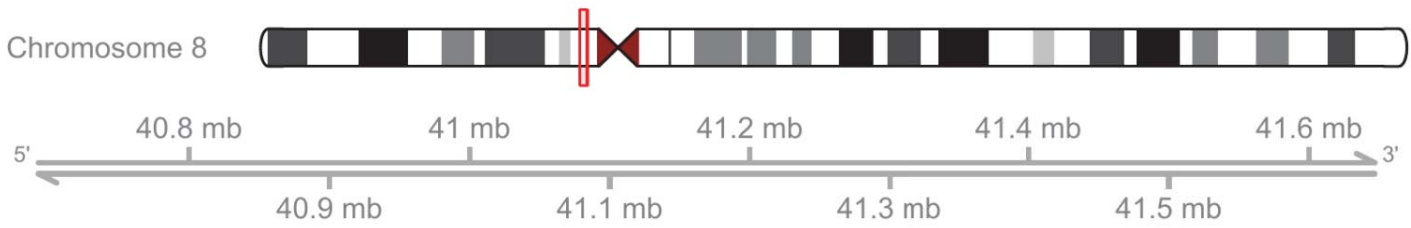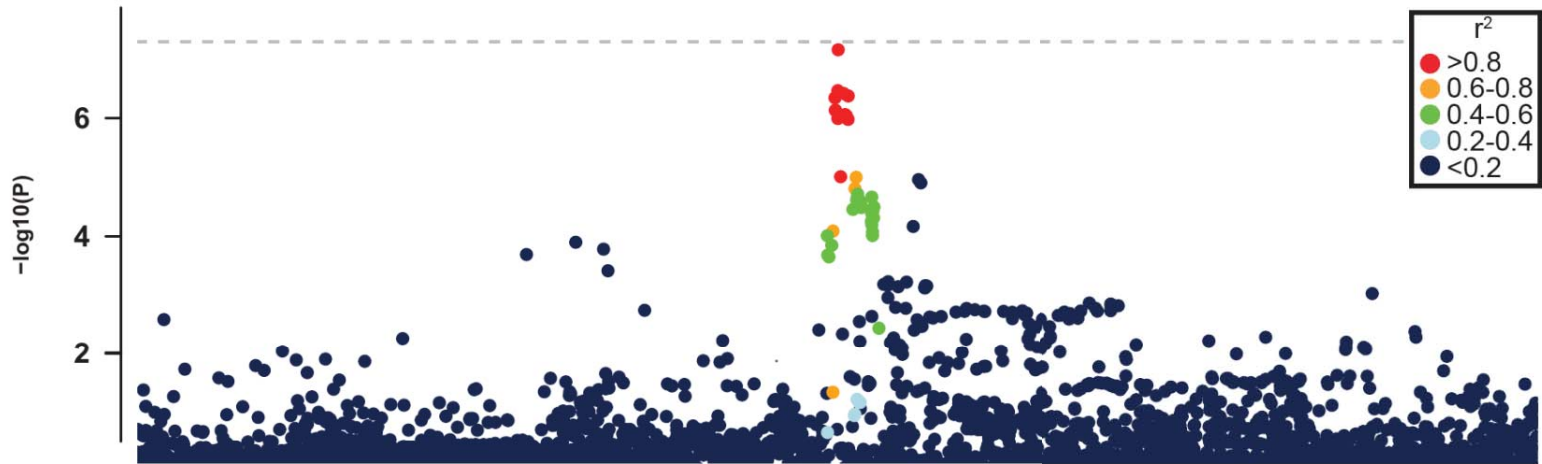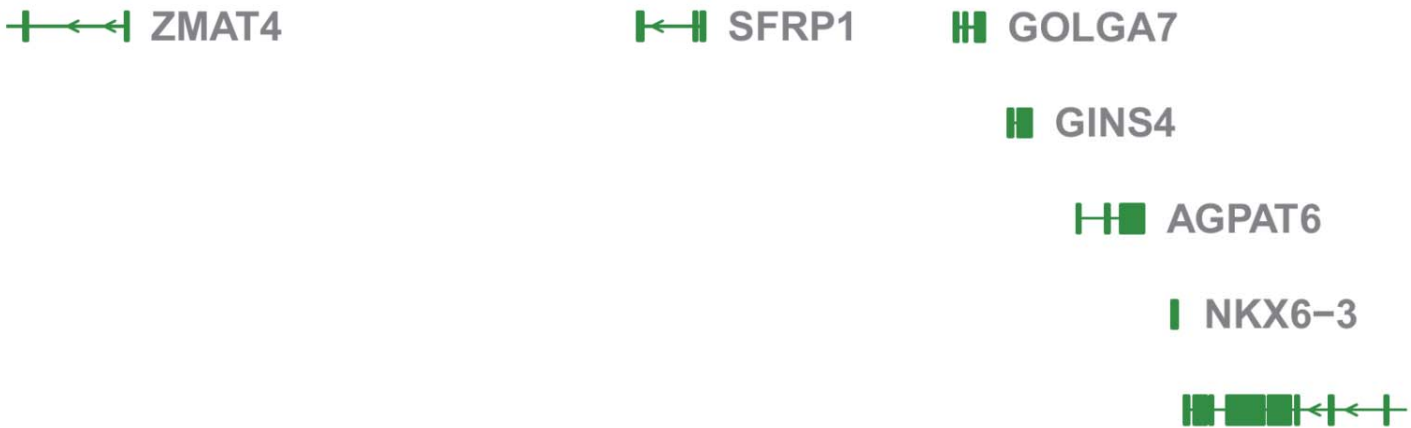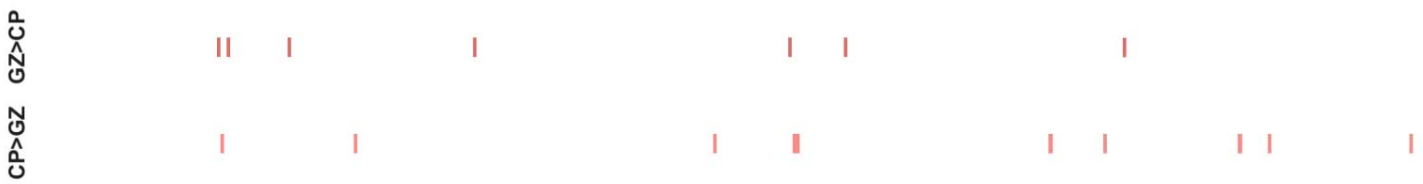

Corrected for total SA

Uncorrected

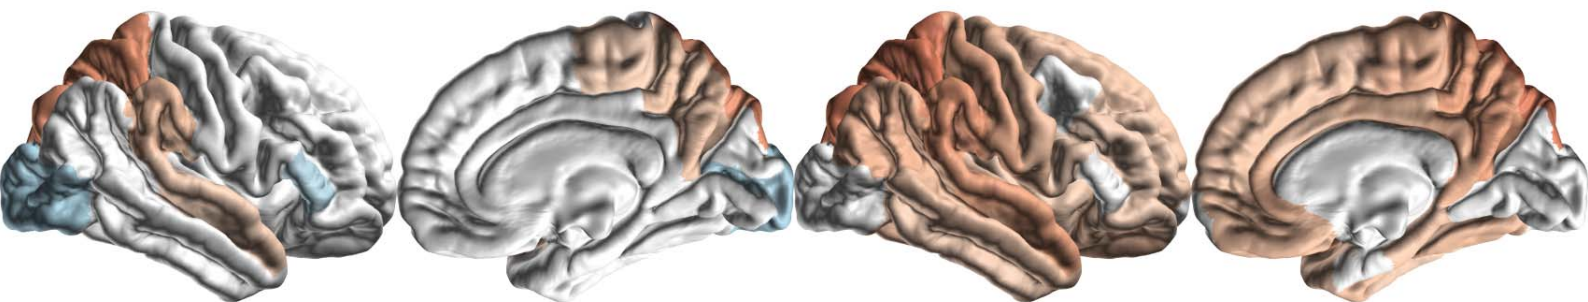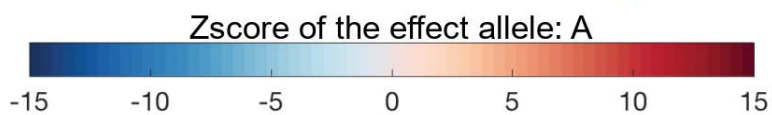



# Superior Parietal SA: rs7980991

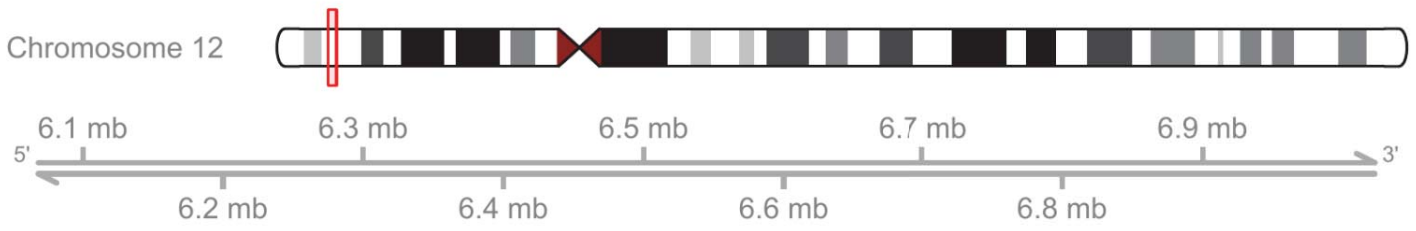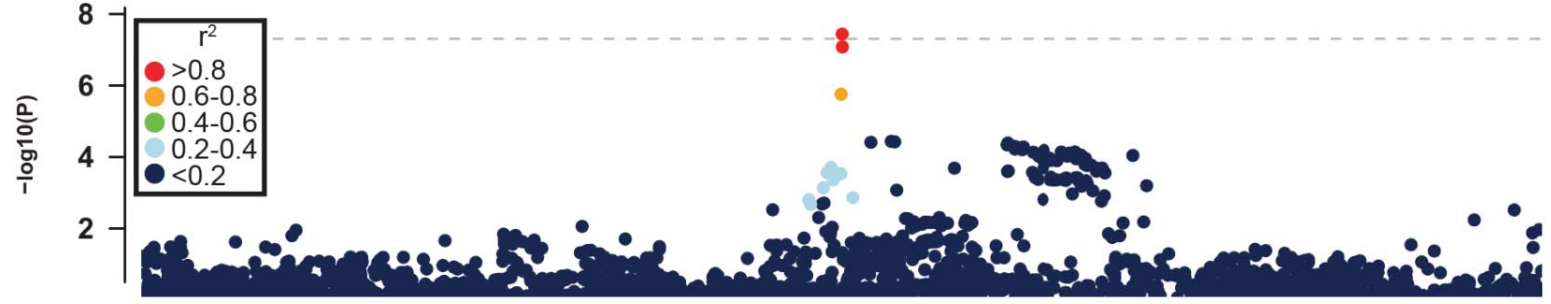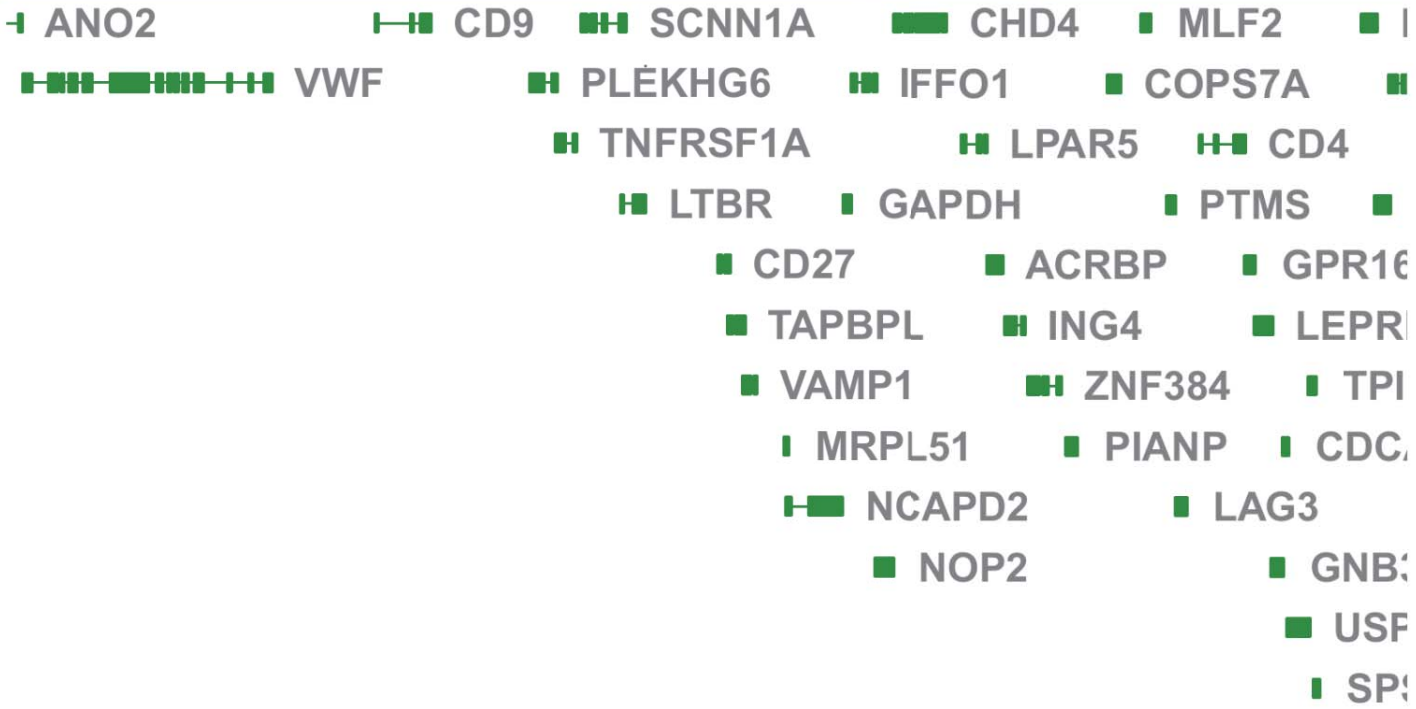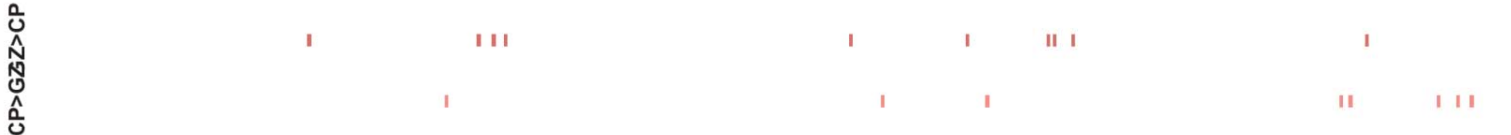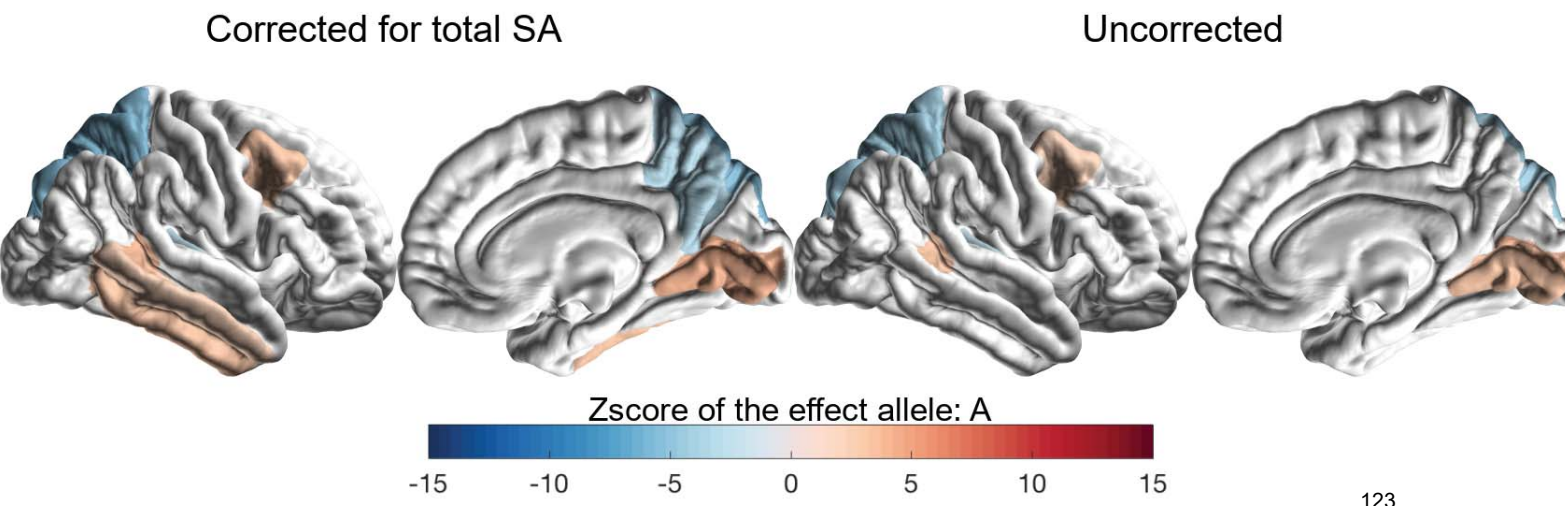

# Superior Parietal SA: rs4924345

Chromosome 15

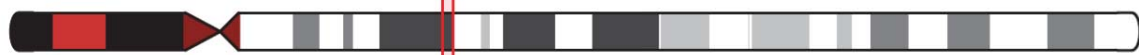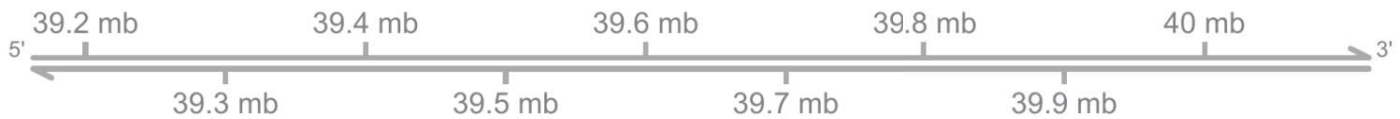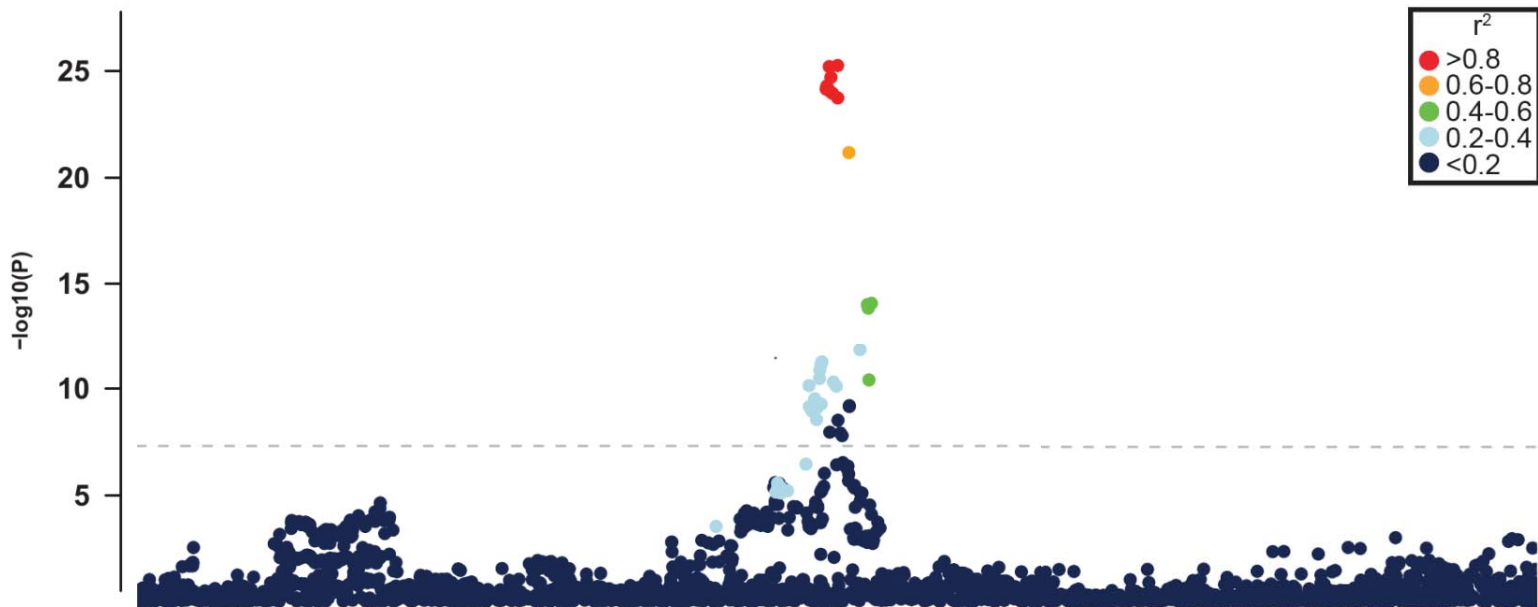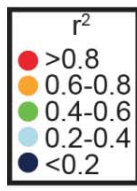

C15orf54

THBS1

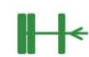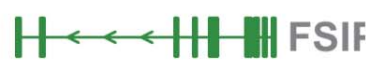

GZ>CP  
CP>GZ

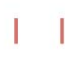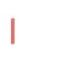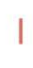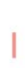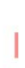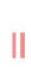

Corrected for total SA

Uncorrected

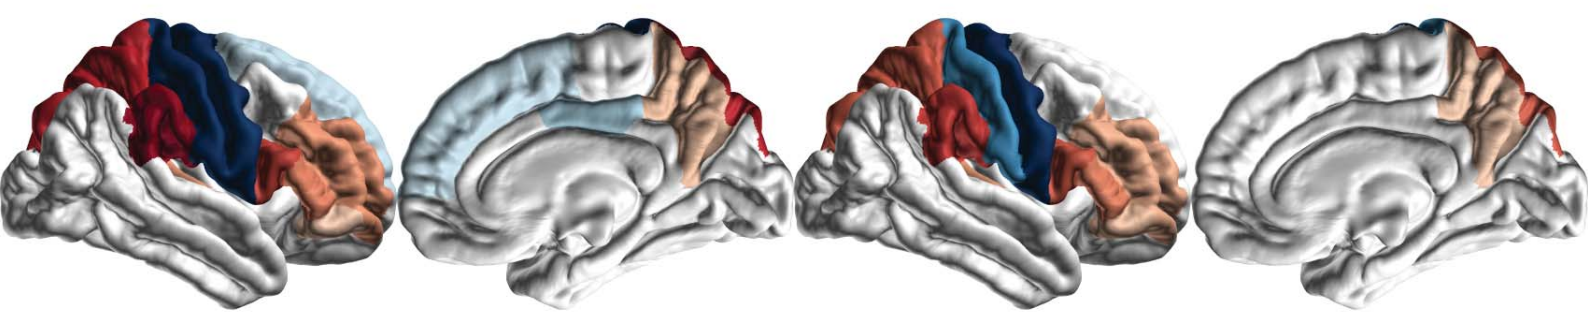

Zscore of the effect allele: A

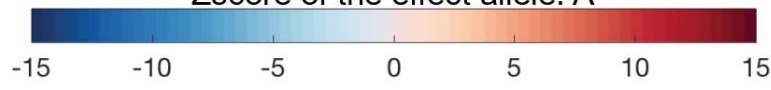

# Superior Parietal SA: rs68175985

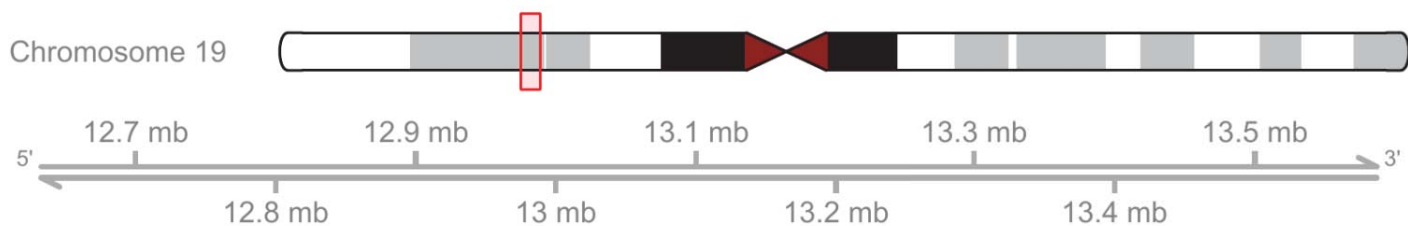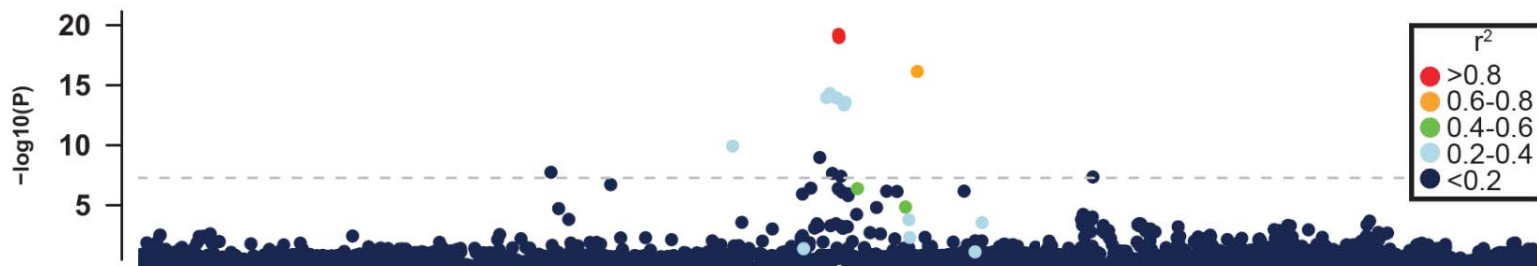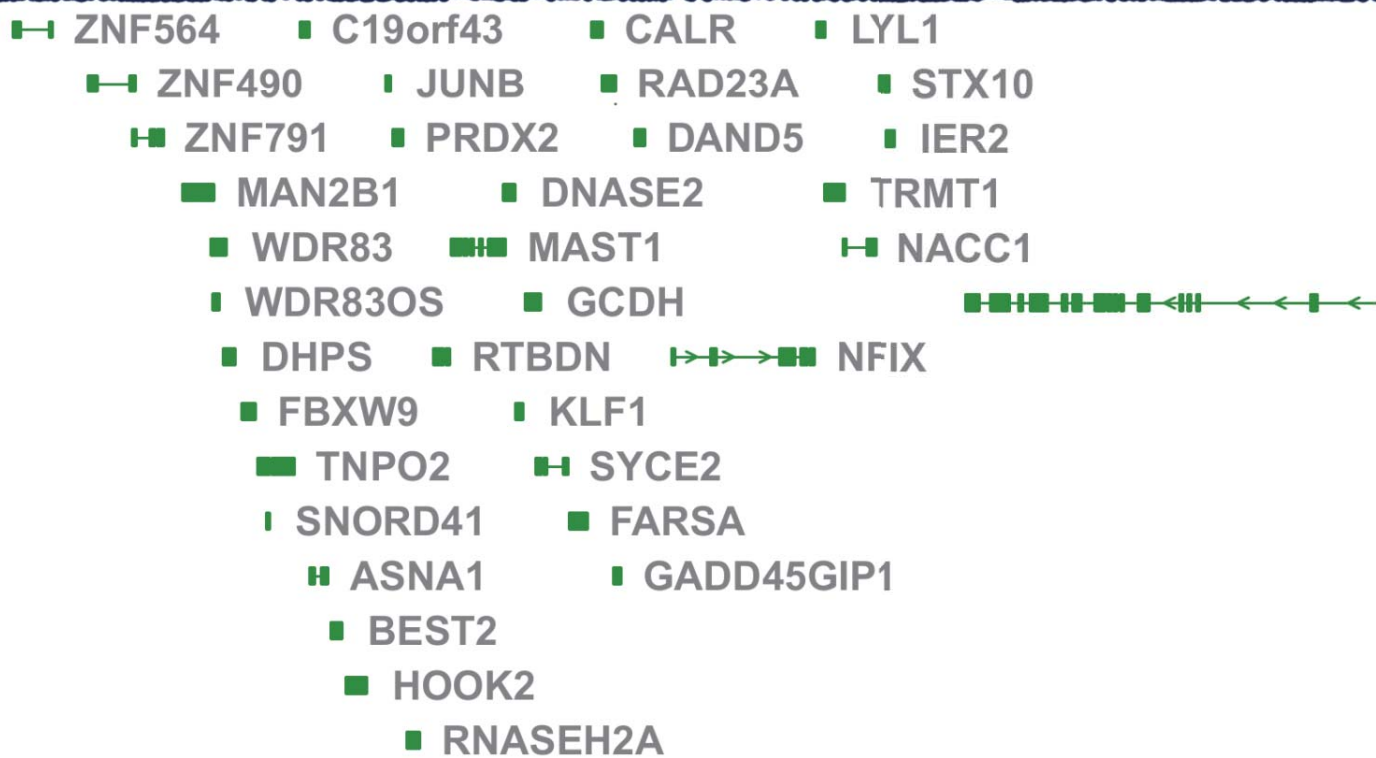

CP>GZZ>CP

Corrected for total SA

Uncorrected

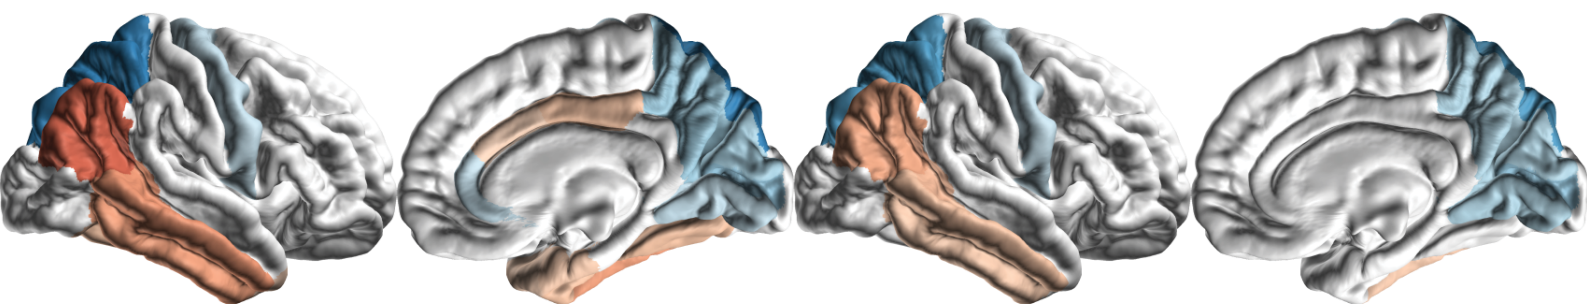

Zscore of the effect allele: A

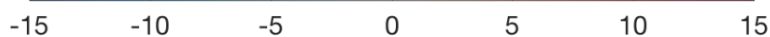



# Superior Parietal SA: rs6022786

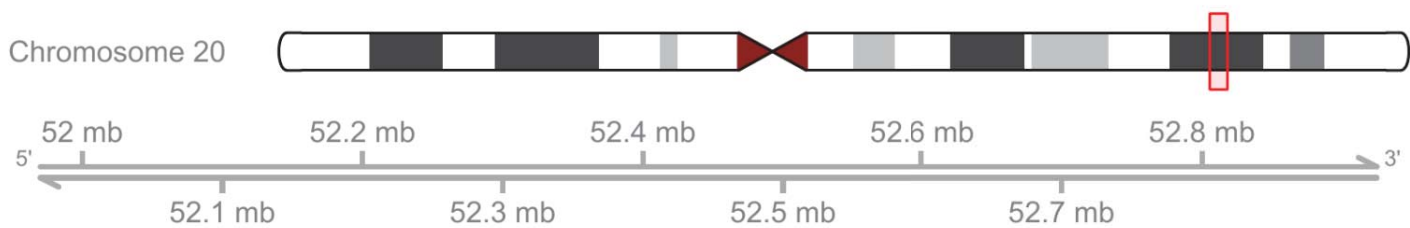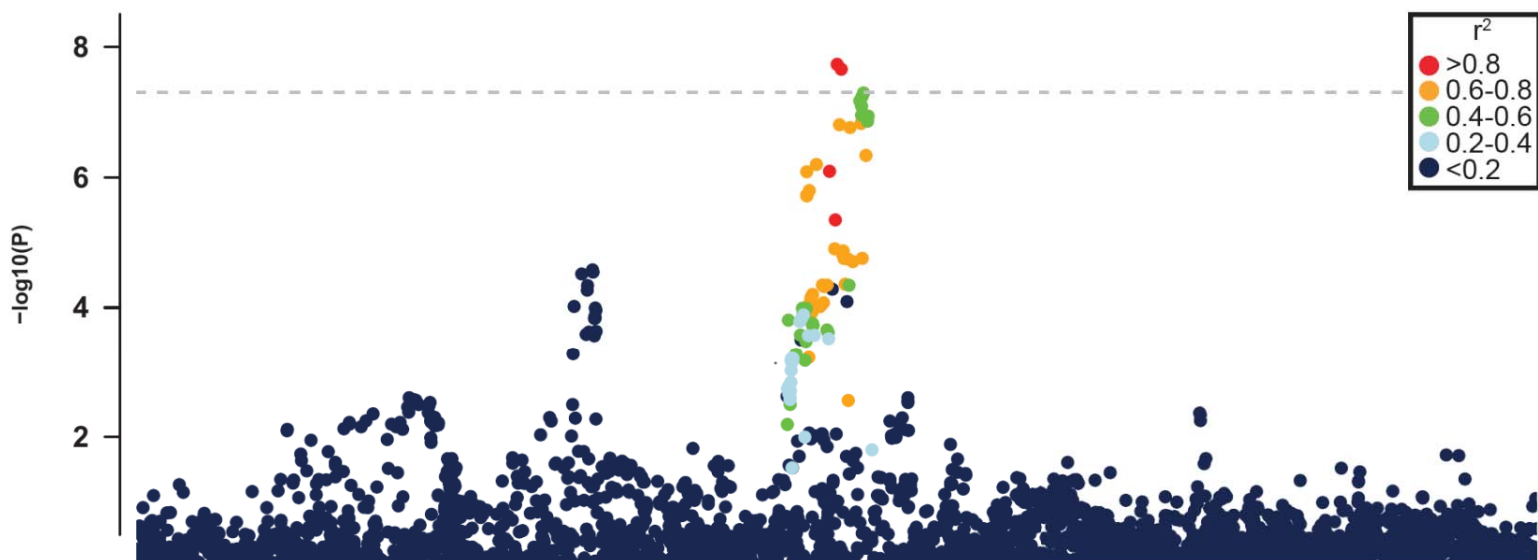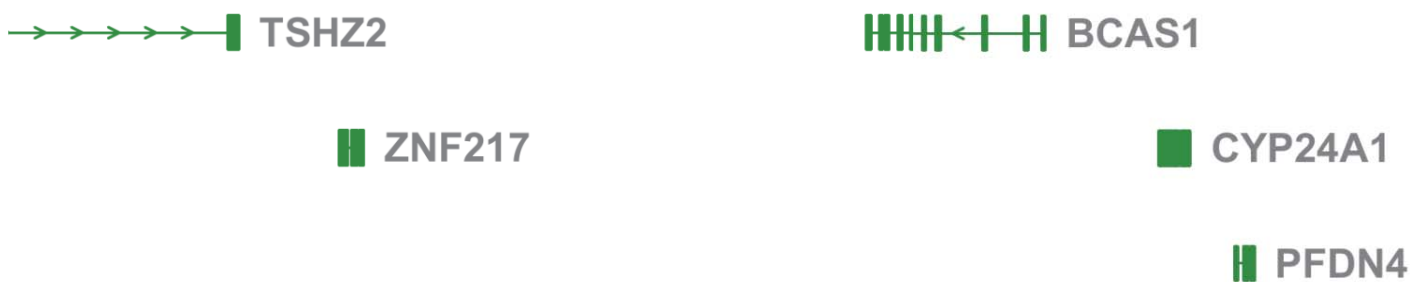

CP>GZ  
GZ>CP

Corrected for total SA

Uncorrected

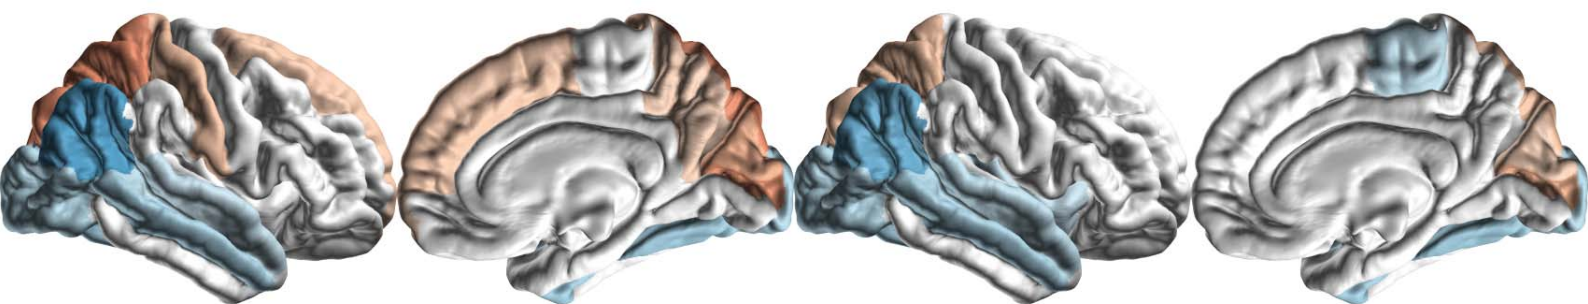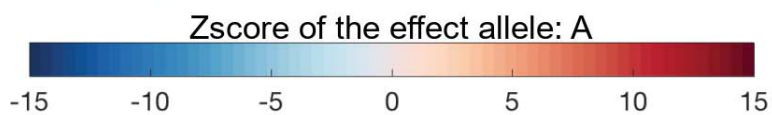

# Superior Parietal TH: rs73215353

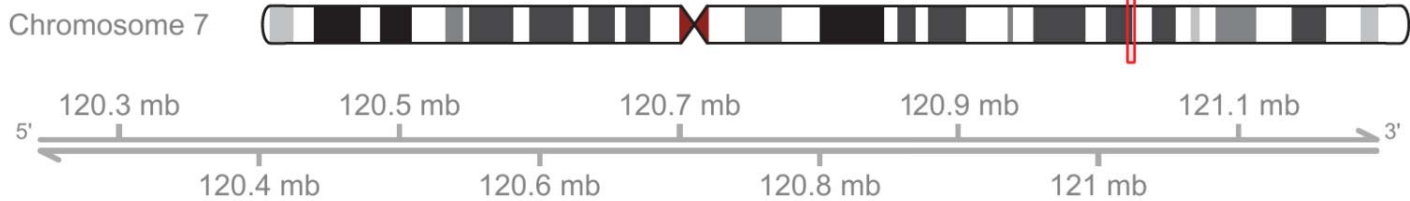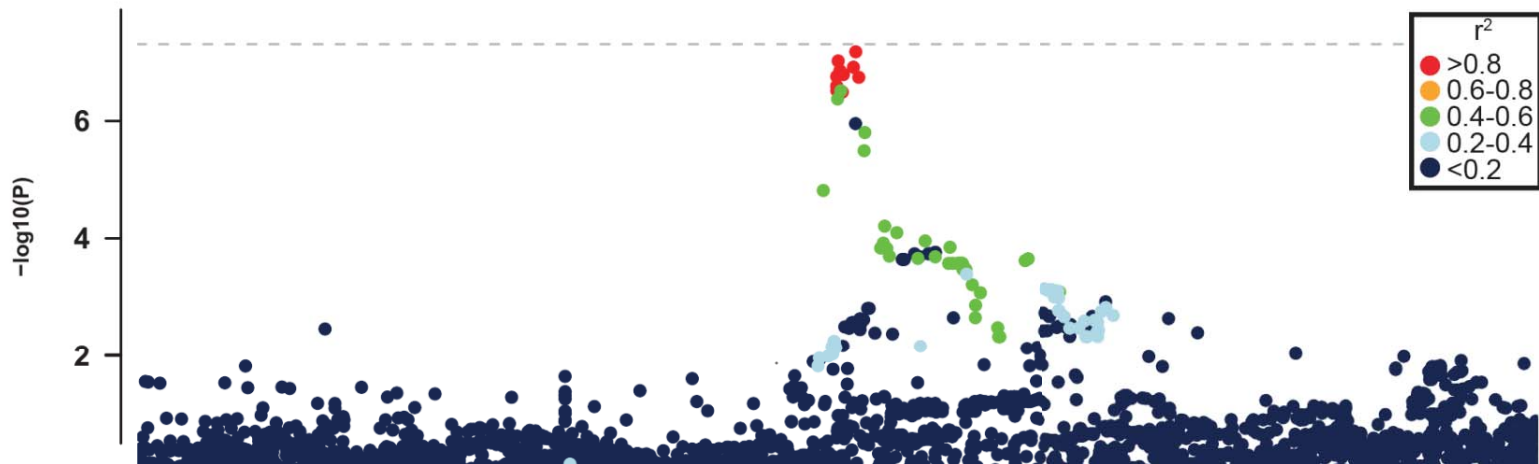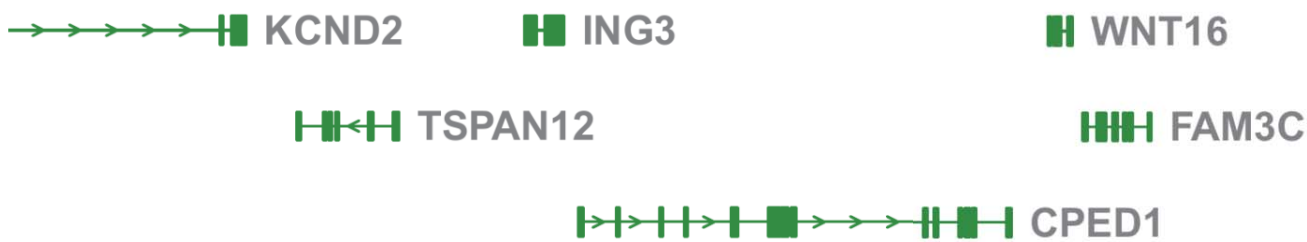

Angular Temporal dIPFC Cingulate

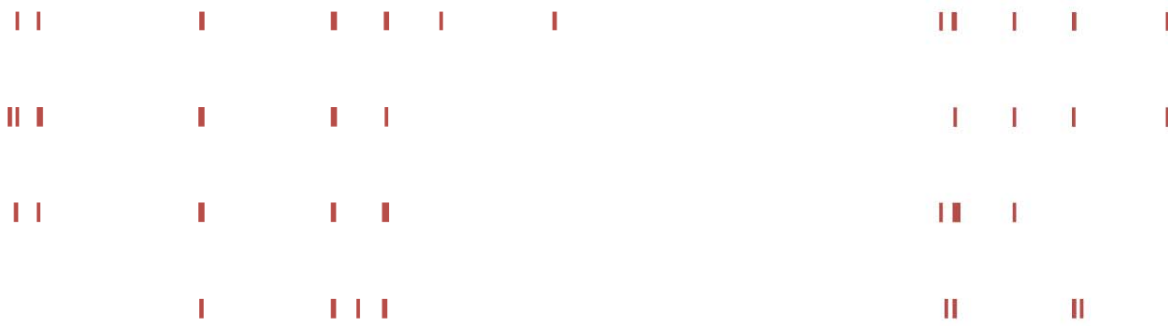

Corrected for average TH

Uncorrected

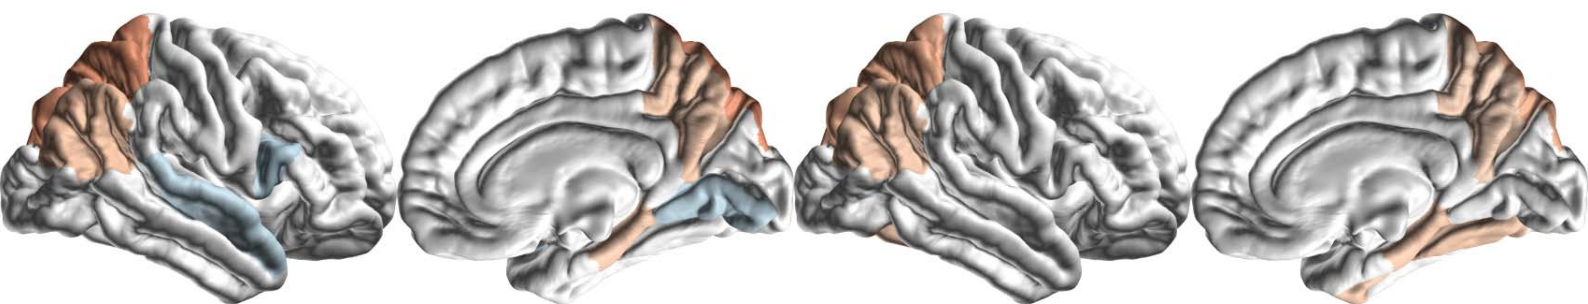

Zscore of the effect allele: T



# Superior Parietal TH: rs1326892

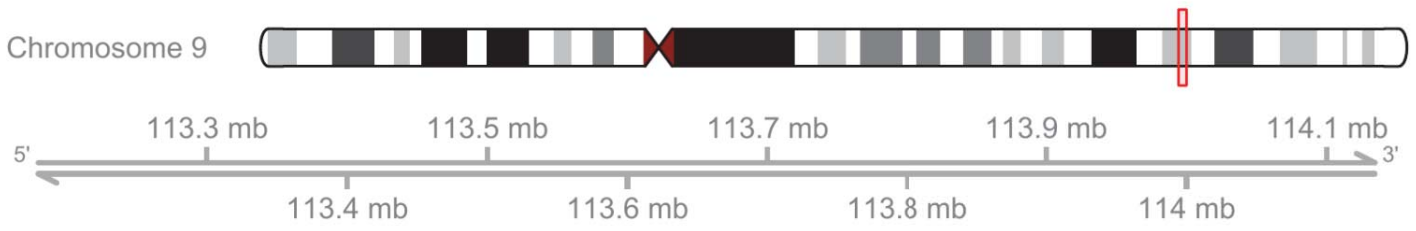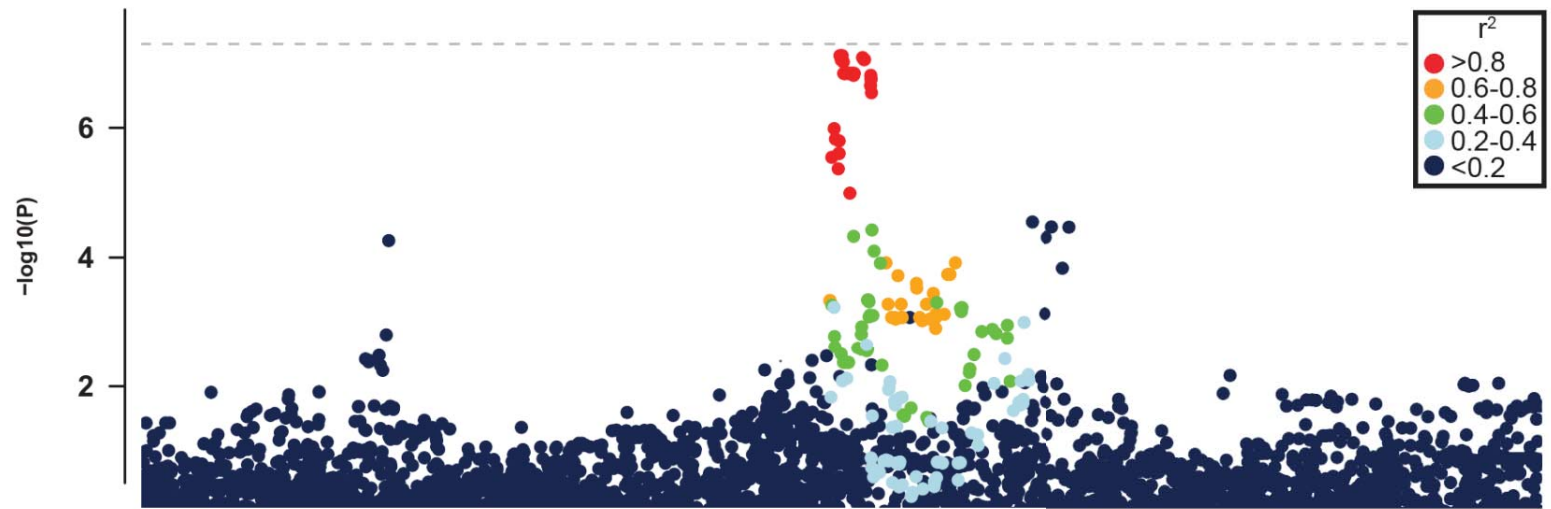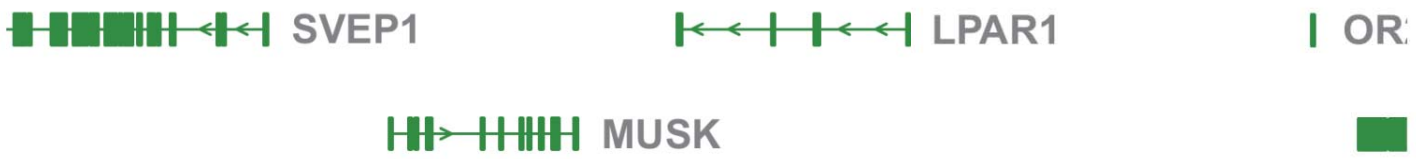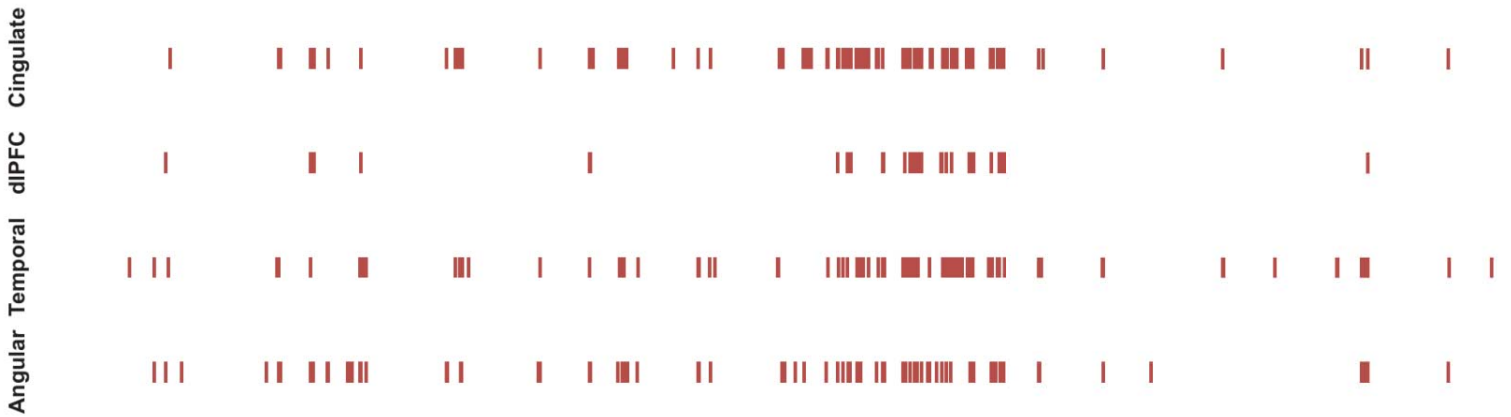

Corrected for average TH

Uncorrected

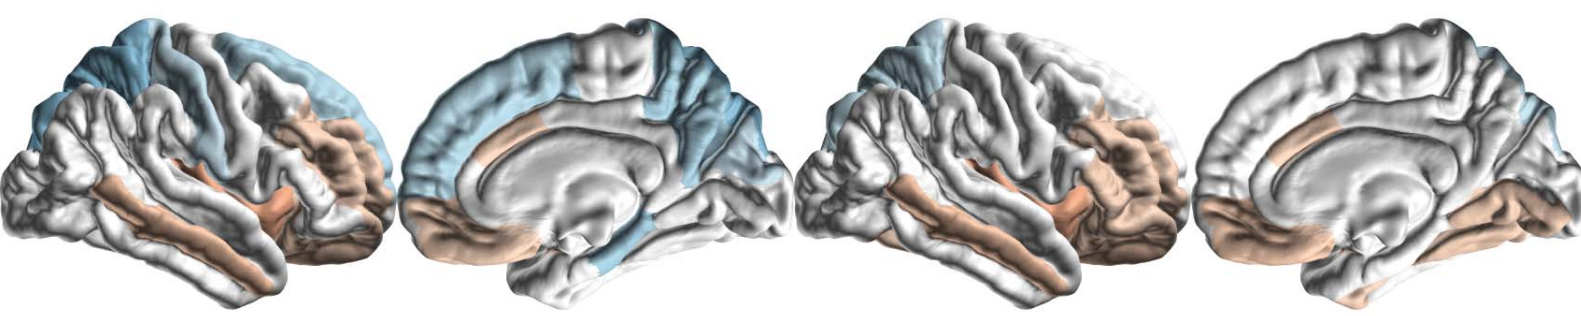



# Superior Parietal TH: rs7203251

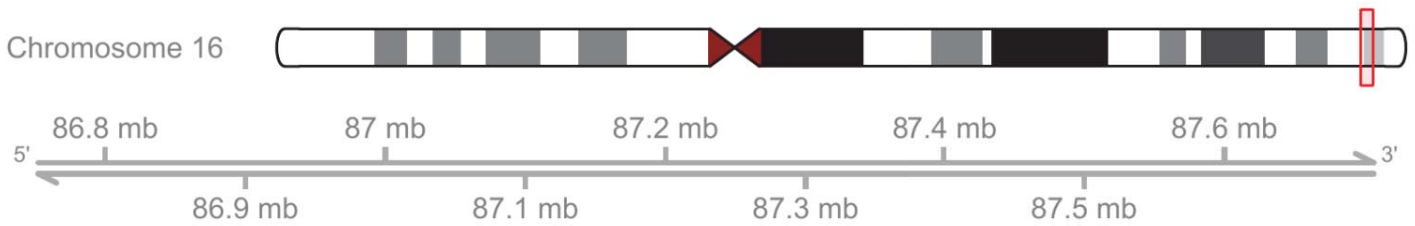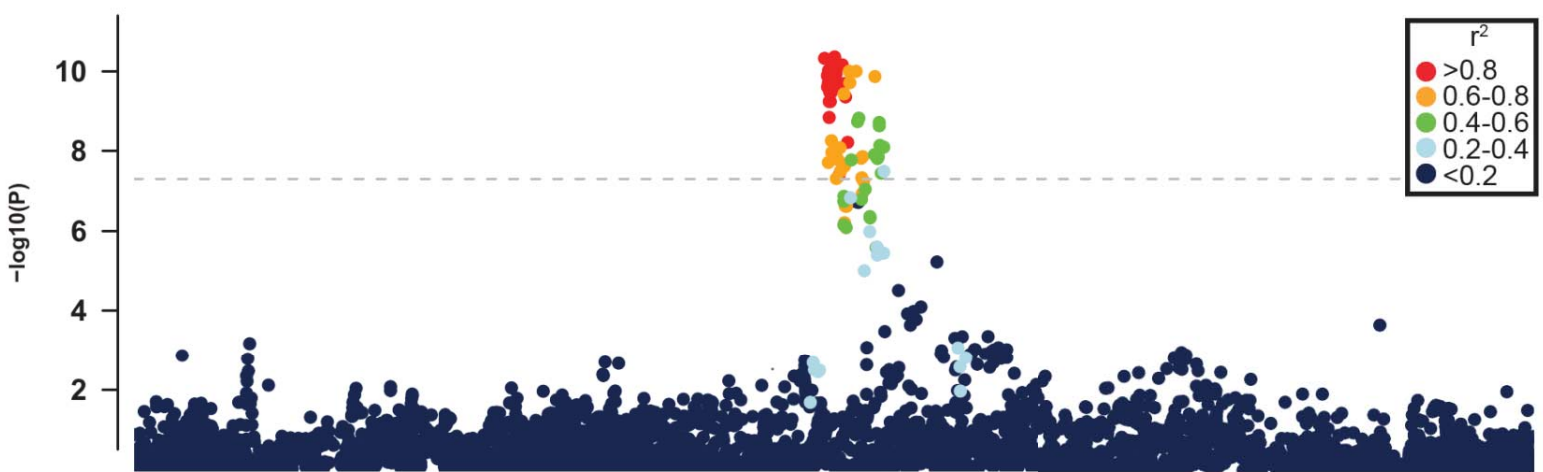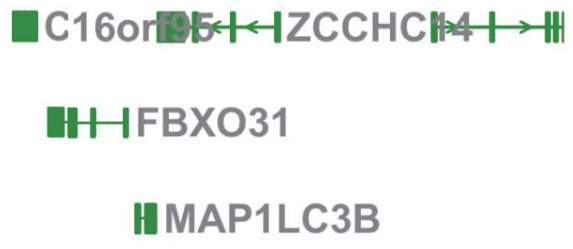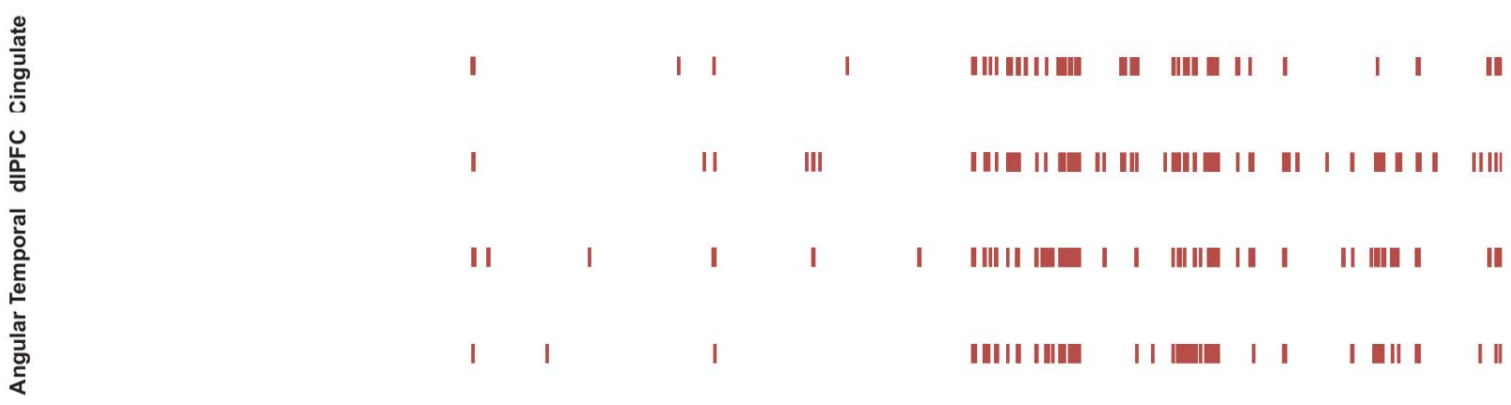

Corrected for average TH

Uncorrected

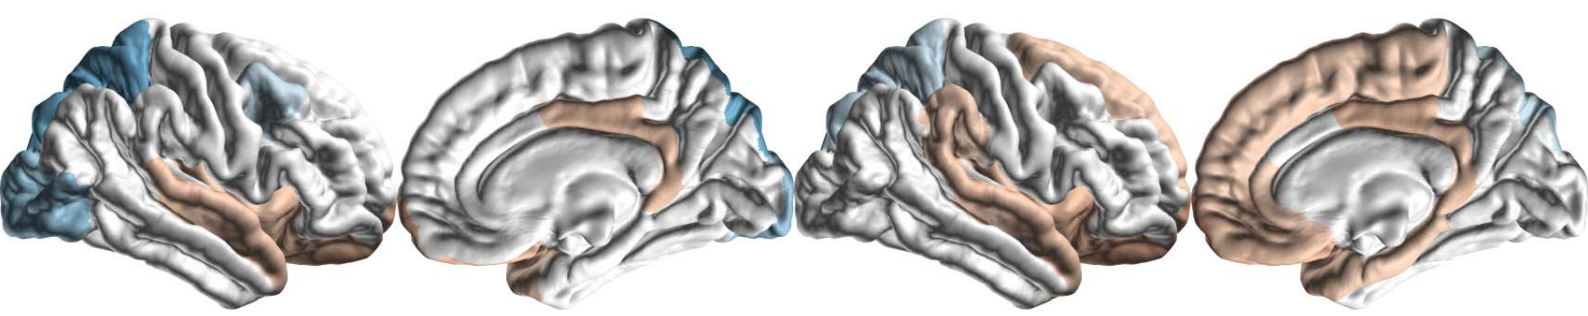

# Supramarginal SA: rs2279829

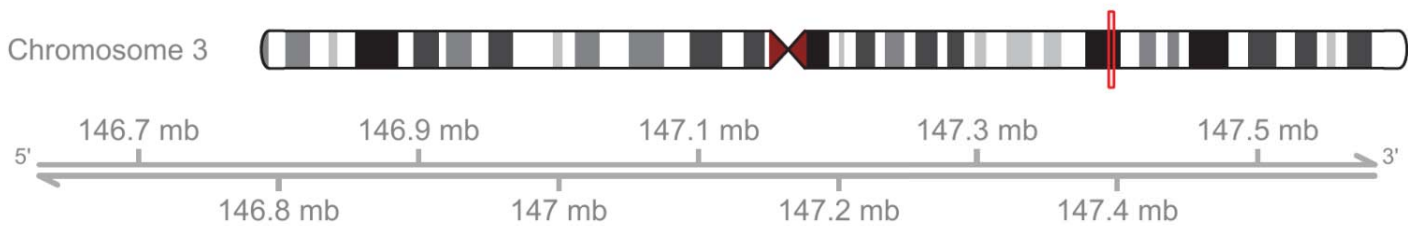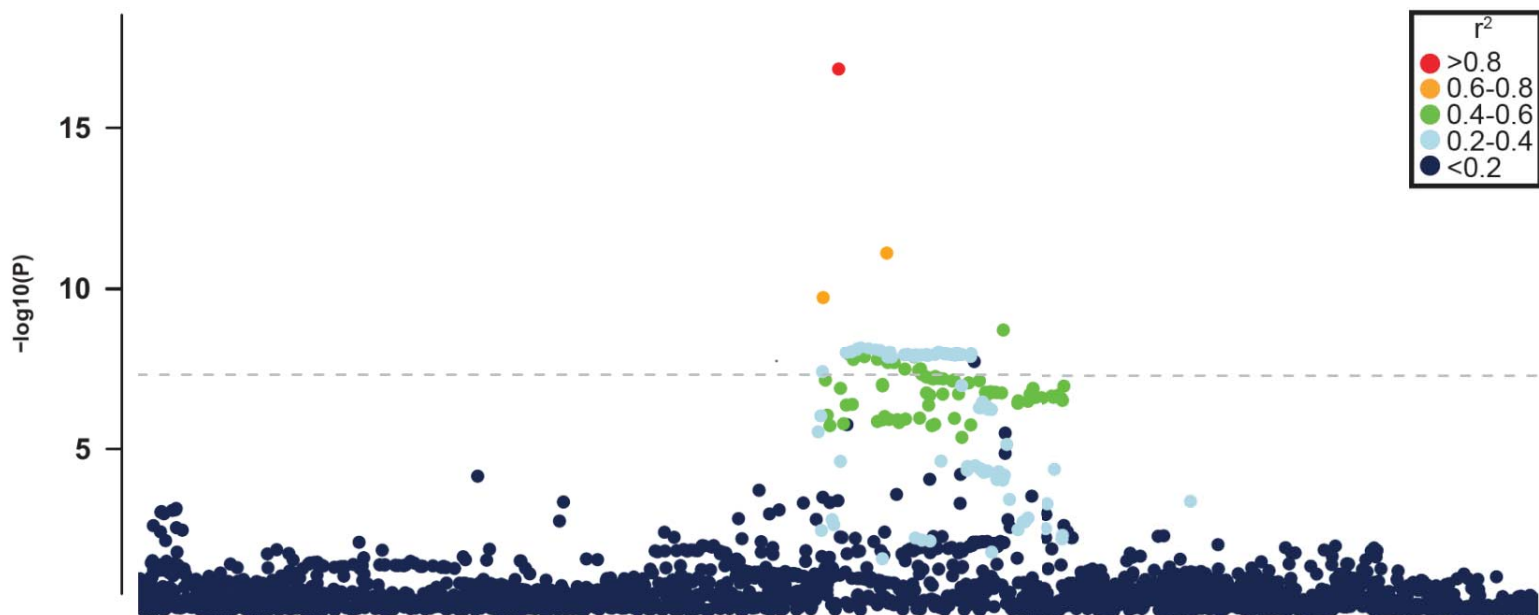

ZIC4

ZIC1

GZ>CP

CP>GZ

Corrected for total SA

Uncorrected



Zscore of the effect allele: T



# Supramarginal SA: rs2200225

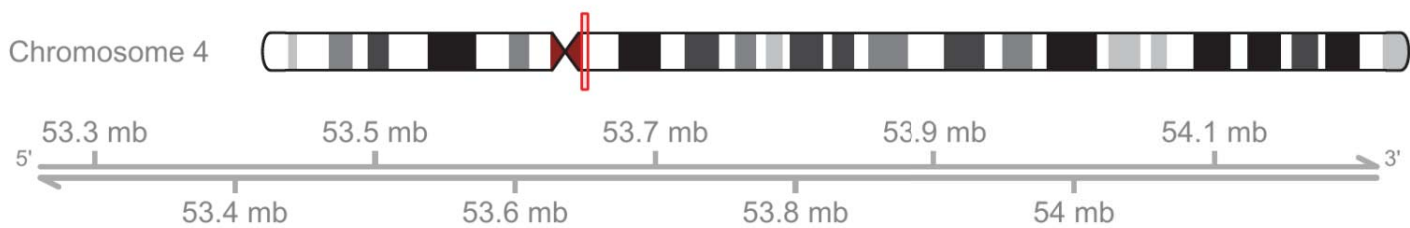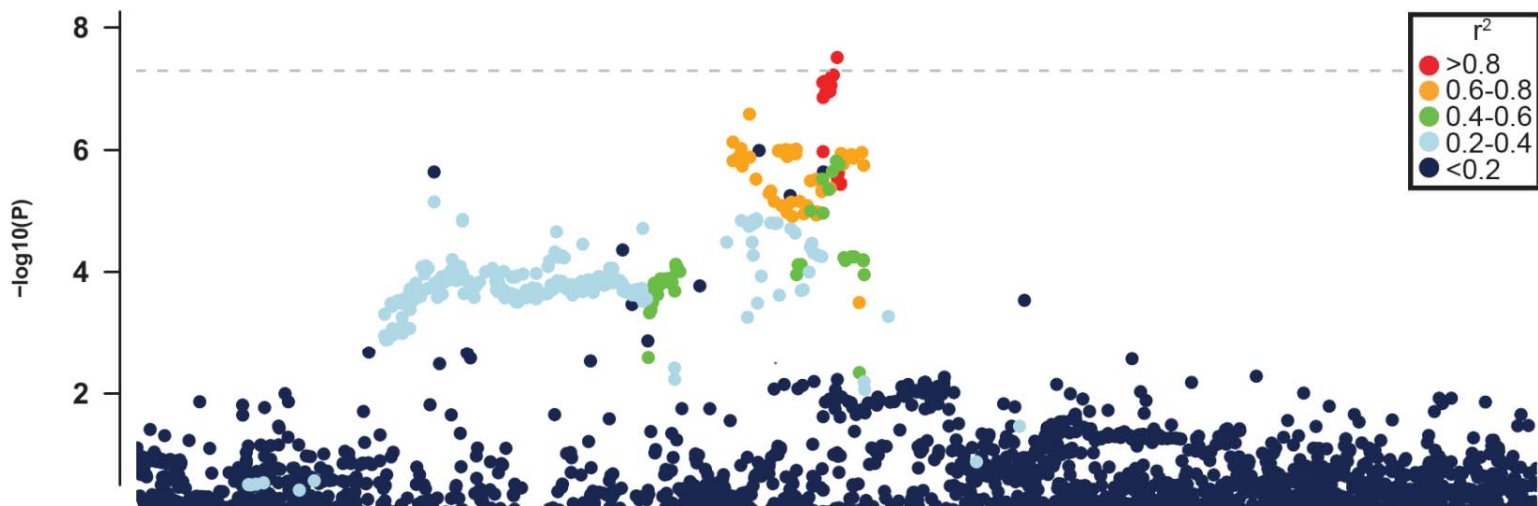

USP46

RASL11B

SNORA26

ERVMER34-1

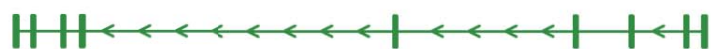

CP>GZ GZ>CP

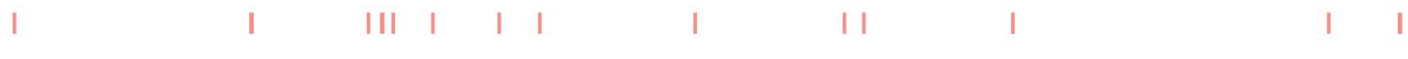

Corrected for total SA

Uncorrected

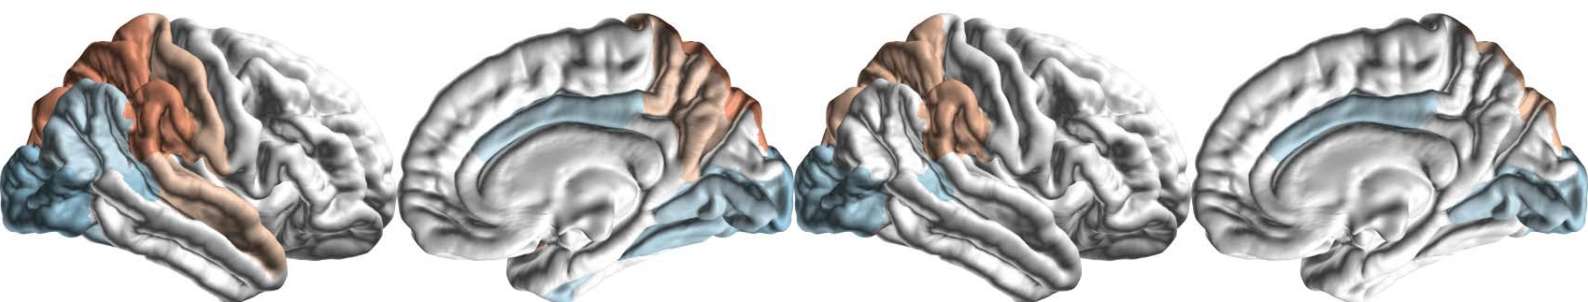

Zscore of the effect allele: A





# Supramarginal SA: rs221326

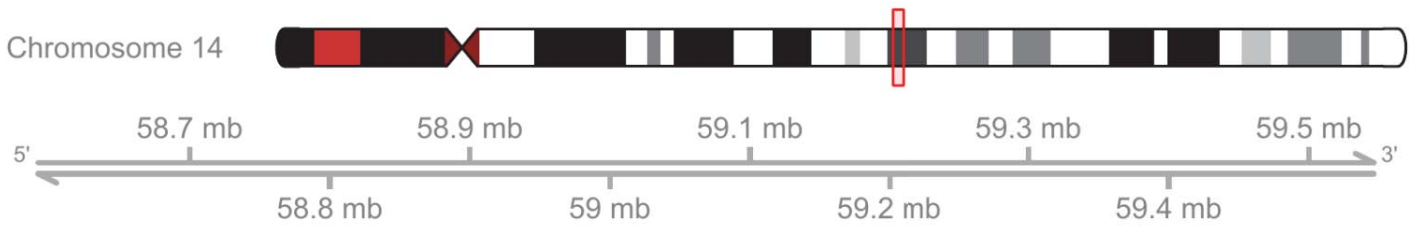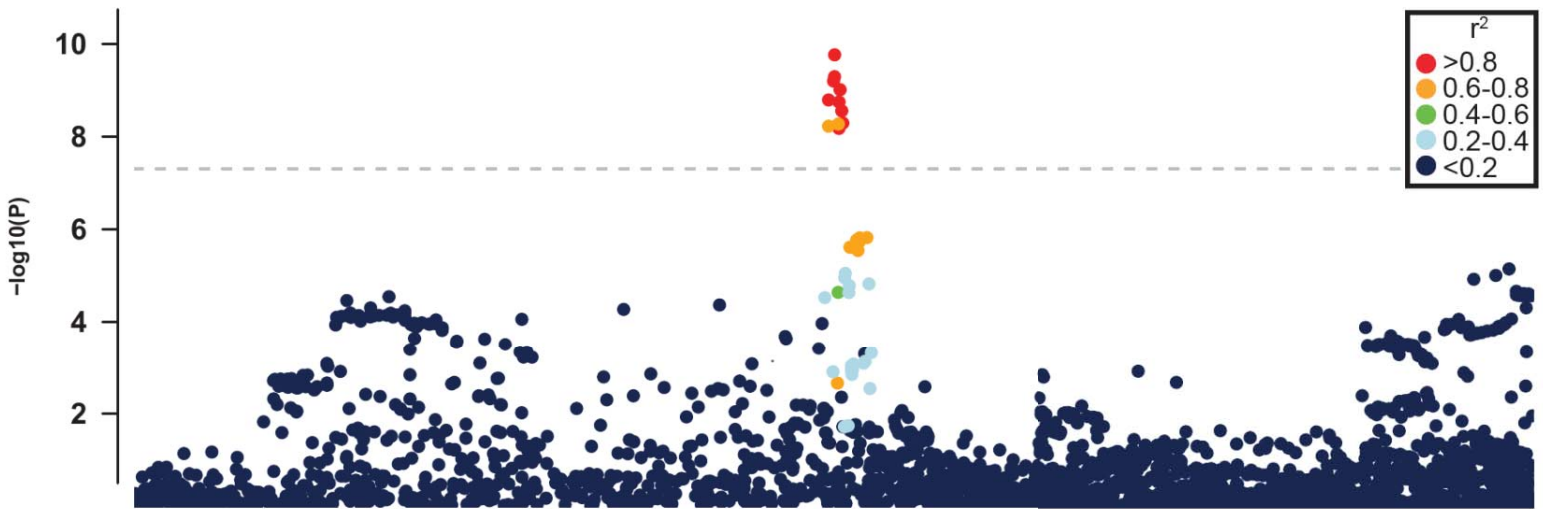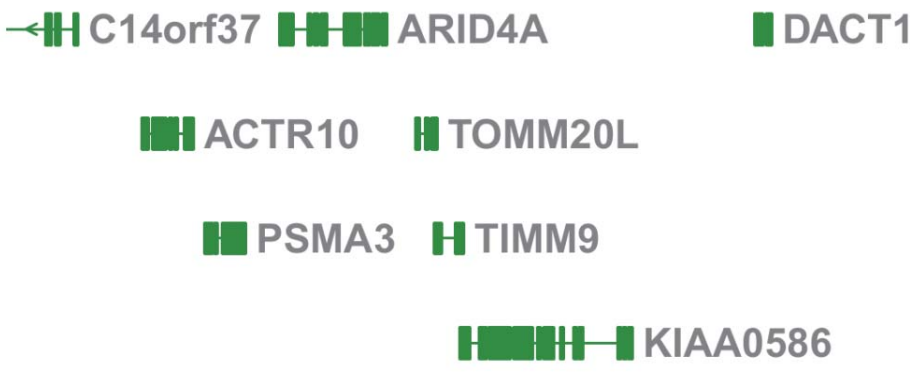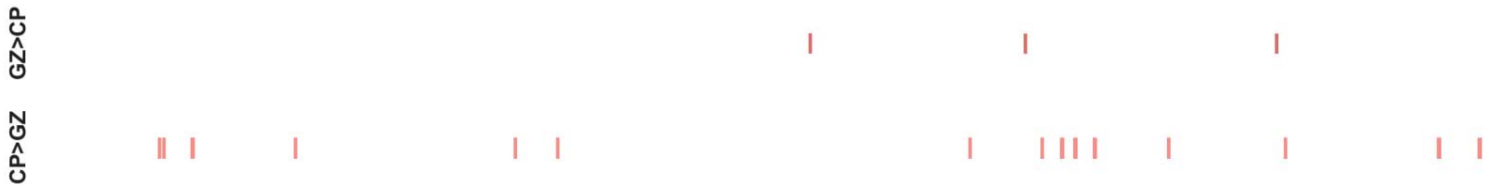

Corrected for total SA

Uncorrected

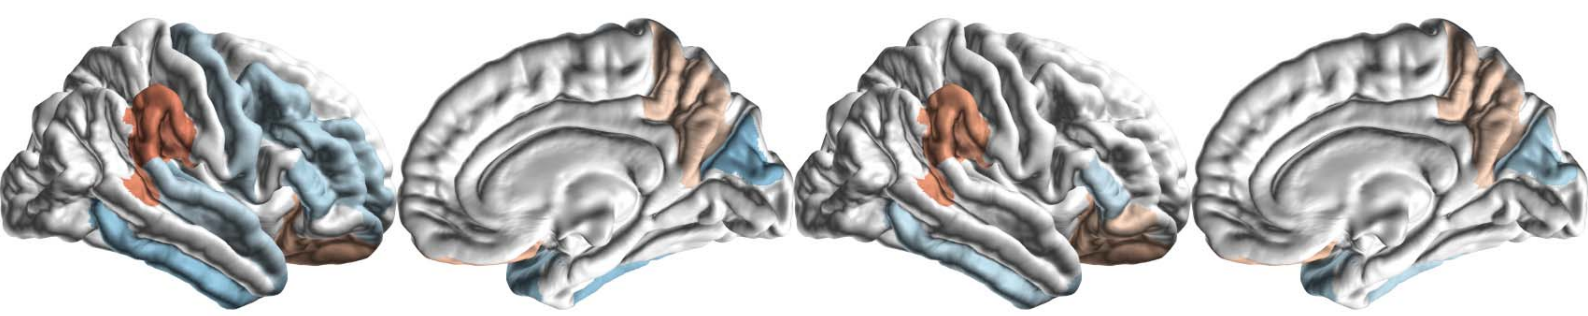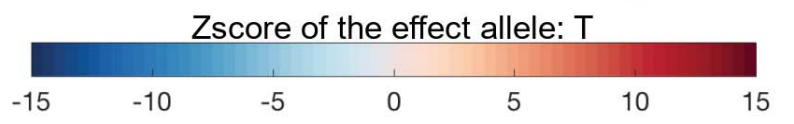

### Supramarginal SA: rs2164950

Chromosome 14

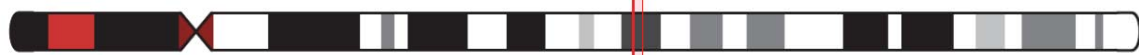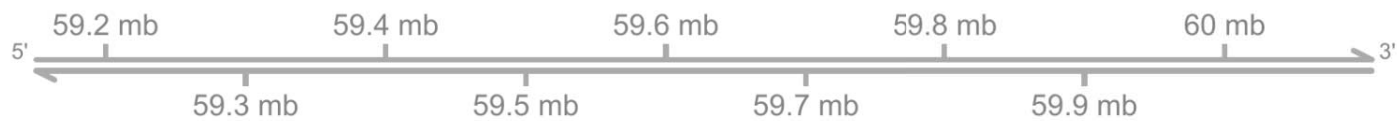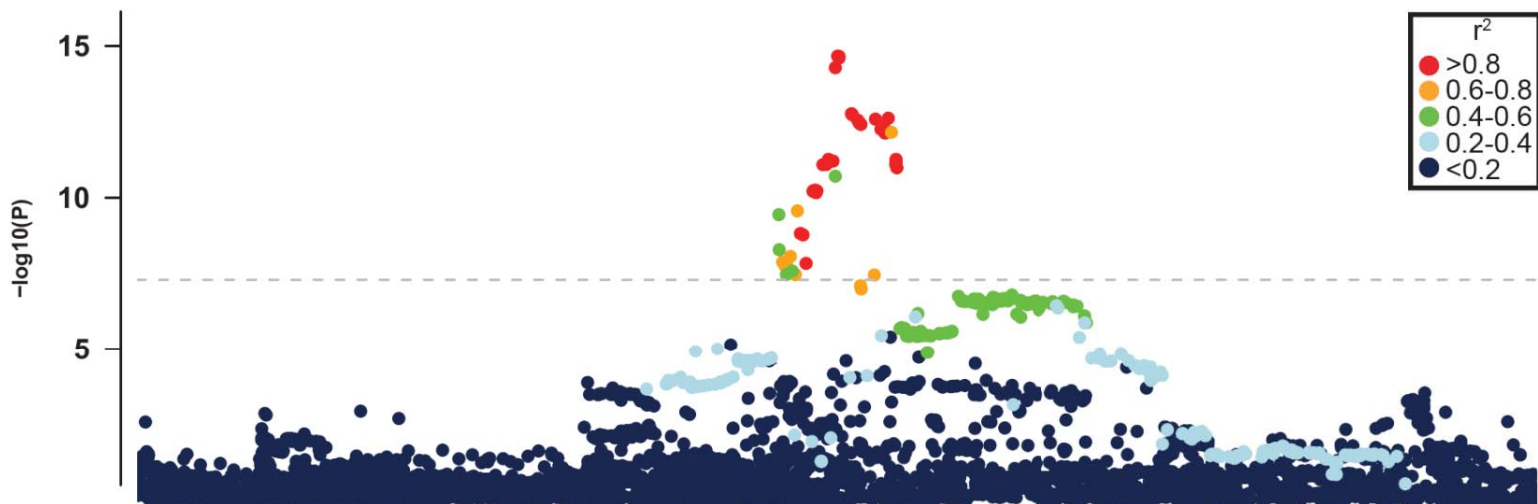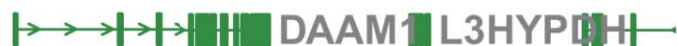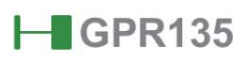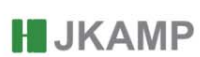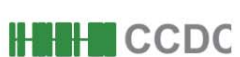

CP>GZ  
GZ>CP

Corrected for total SA

Uncorrected

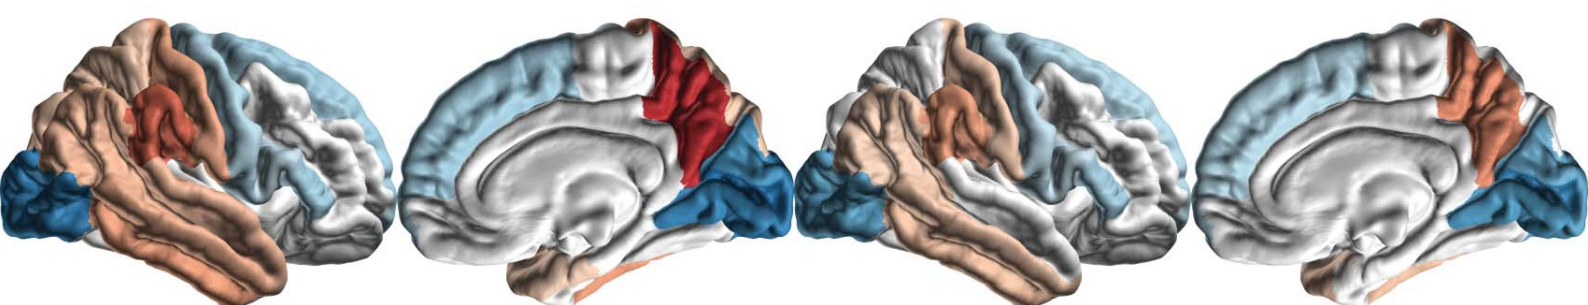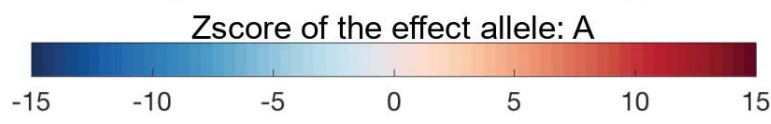

# Supramarginal SA: rs62007727

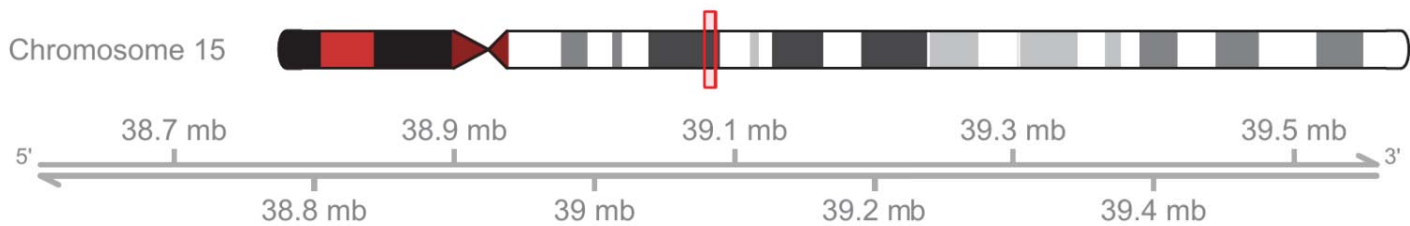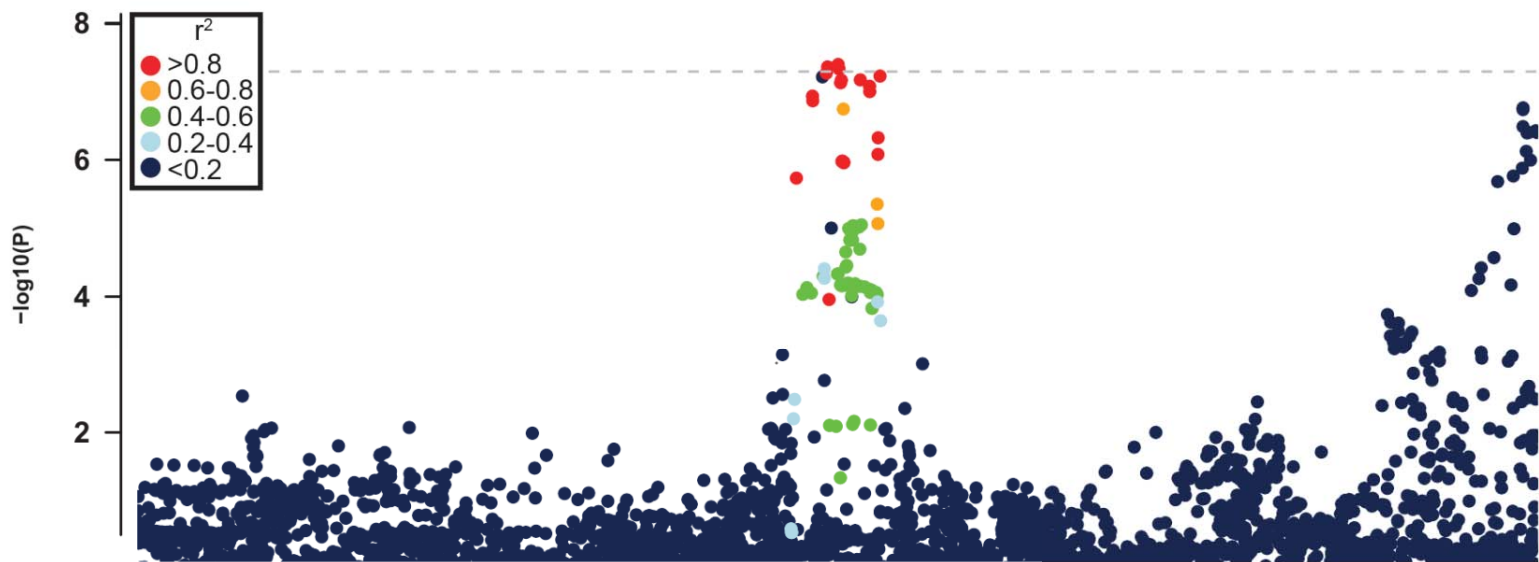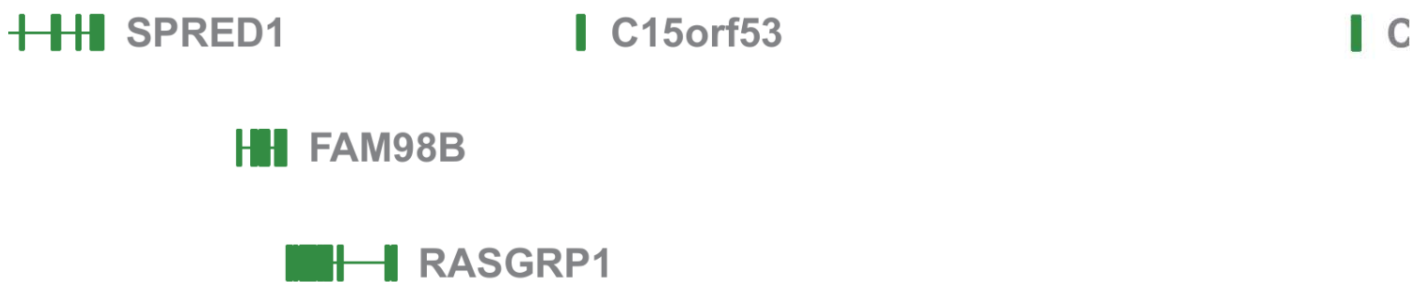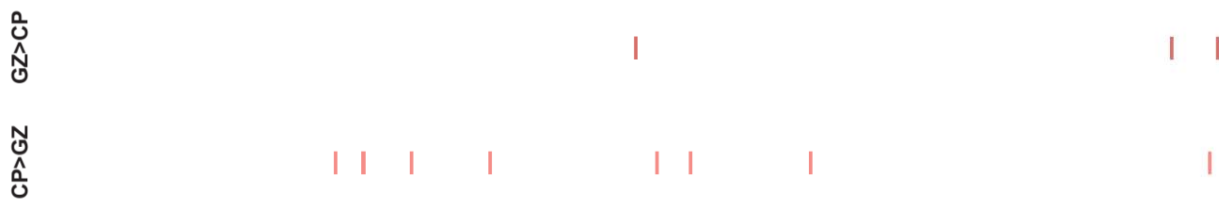

Corrected for total SA

Uncorrected

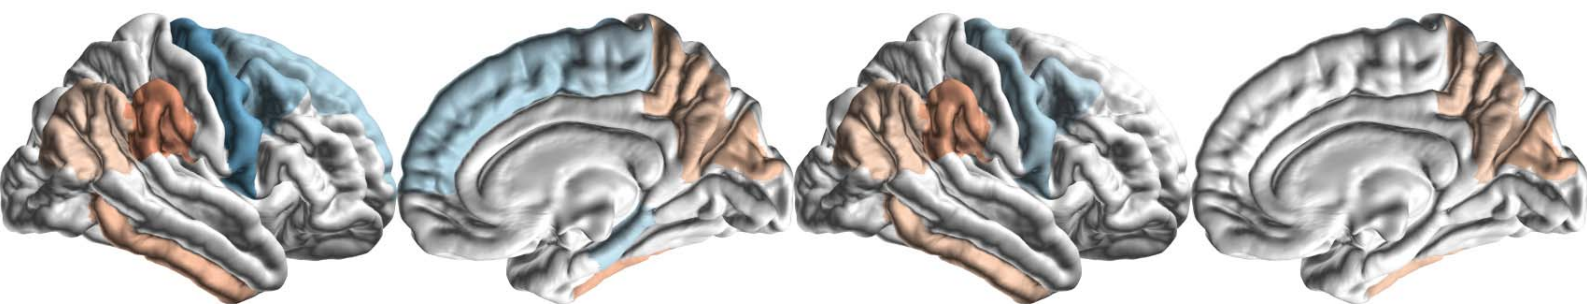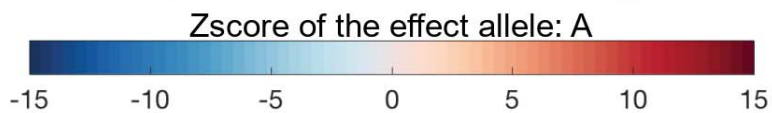



# Supramarginal SA: rs4924345

Chromosome 15

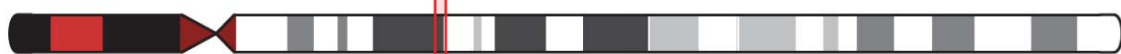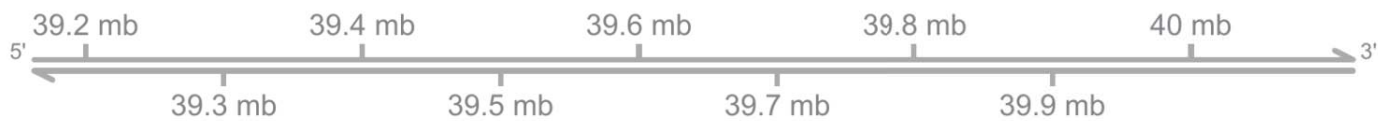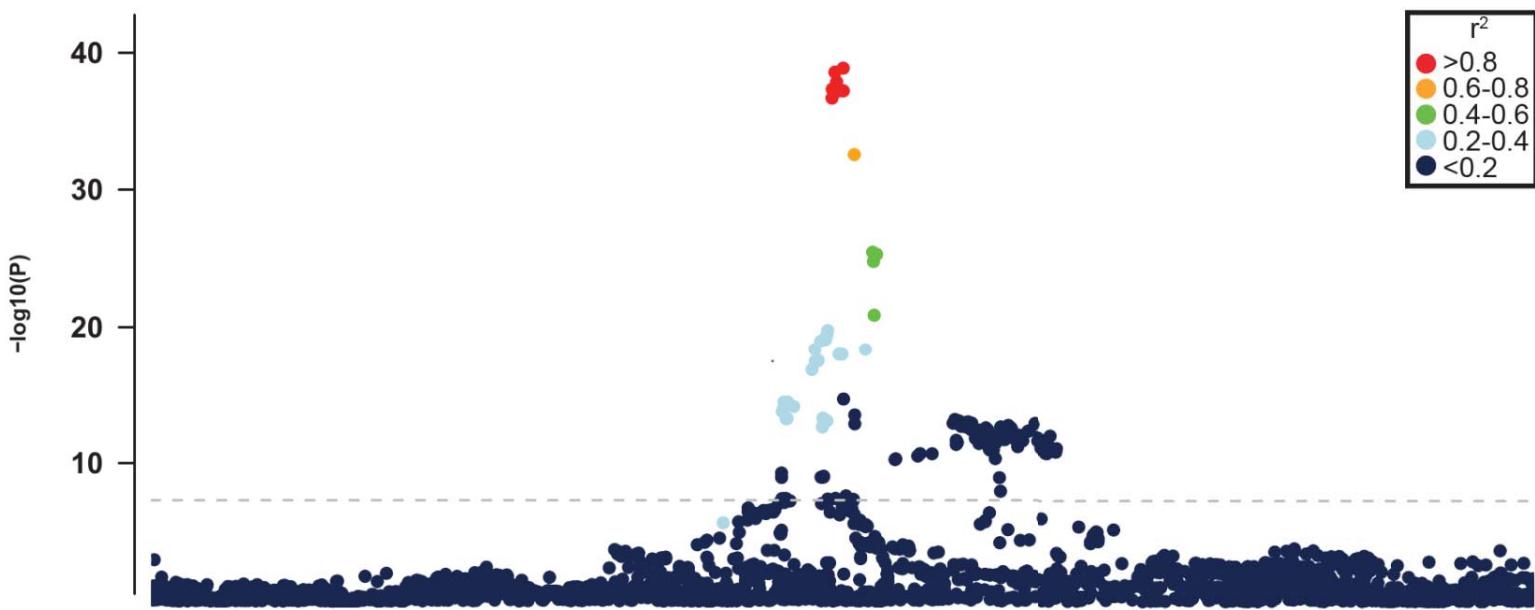

C15orf54

THBS1

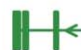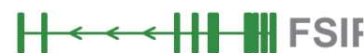

GZ>CP

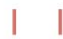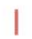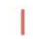

CP>GZ

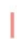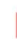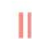

Corrected for total SA

Uncorrected

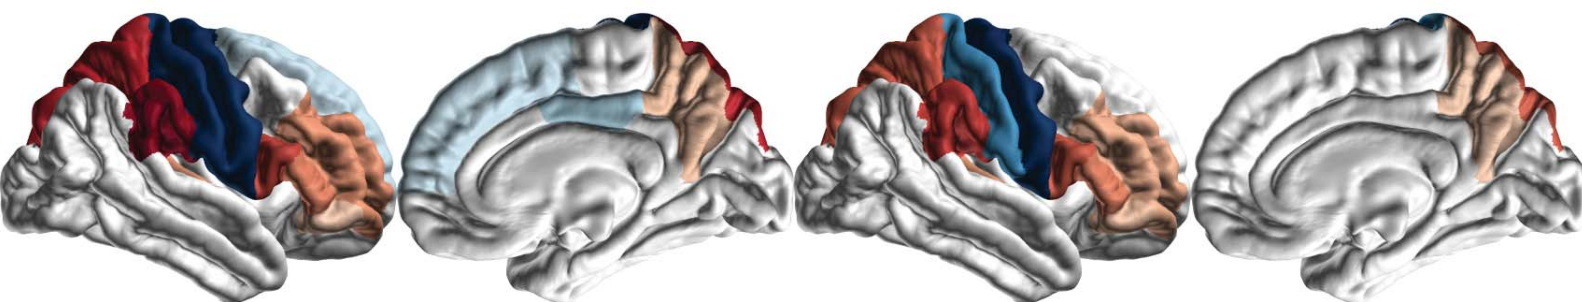

Zscore of the effect allele: A

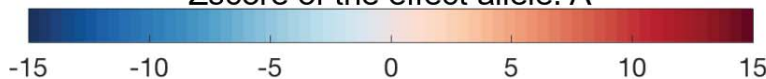

# Supramarginal SA: rs78502100

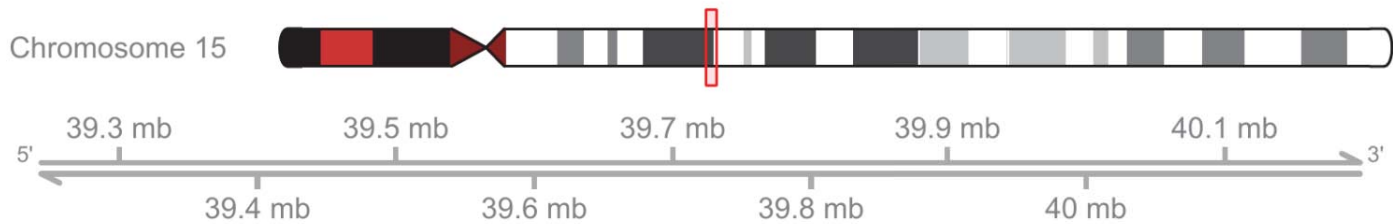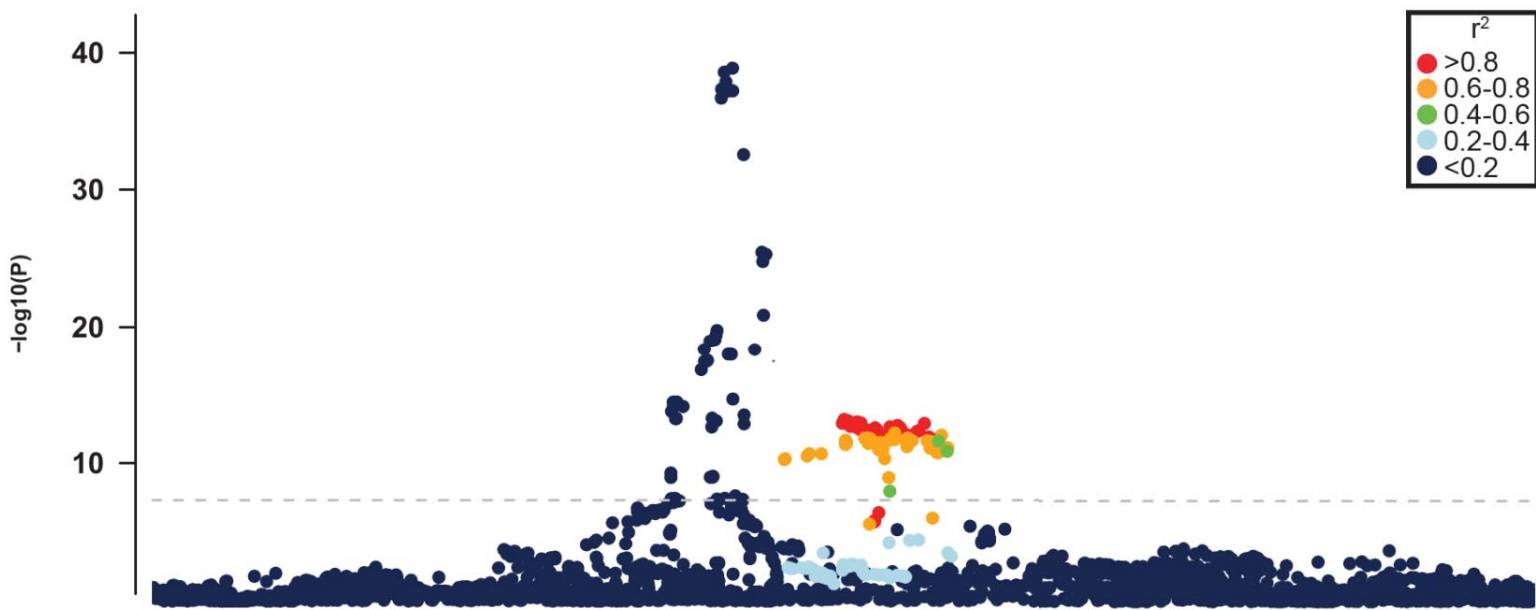

C15orf54

THBS1

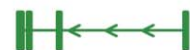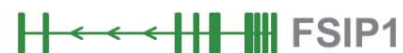

GZ>CP

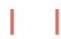

CP>GZ

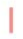

Corrected for total SA

Uncorrected

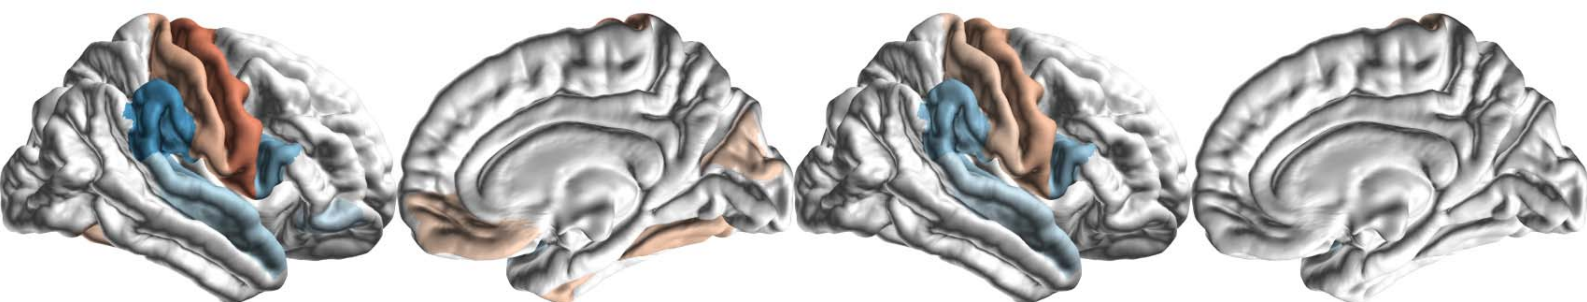

Zscore of the effect allele: C

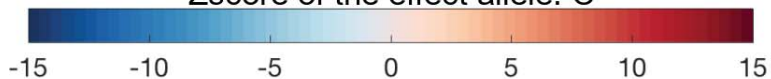

# Inferior Parietal SA: rs1413536

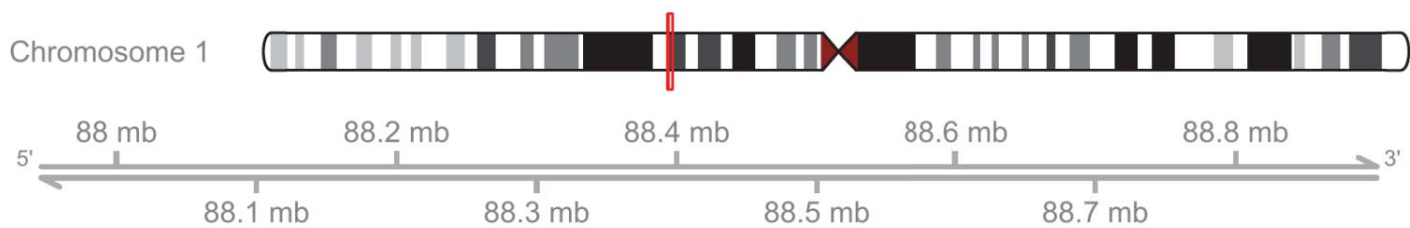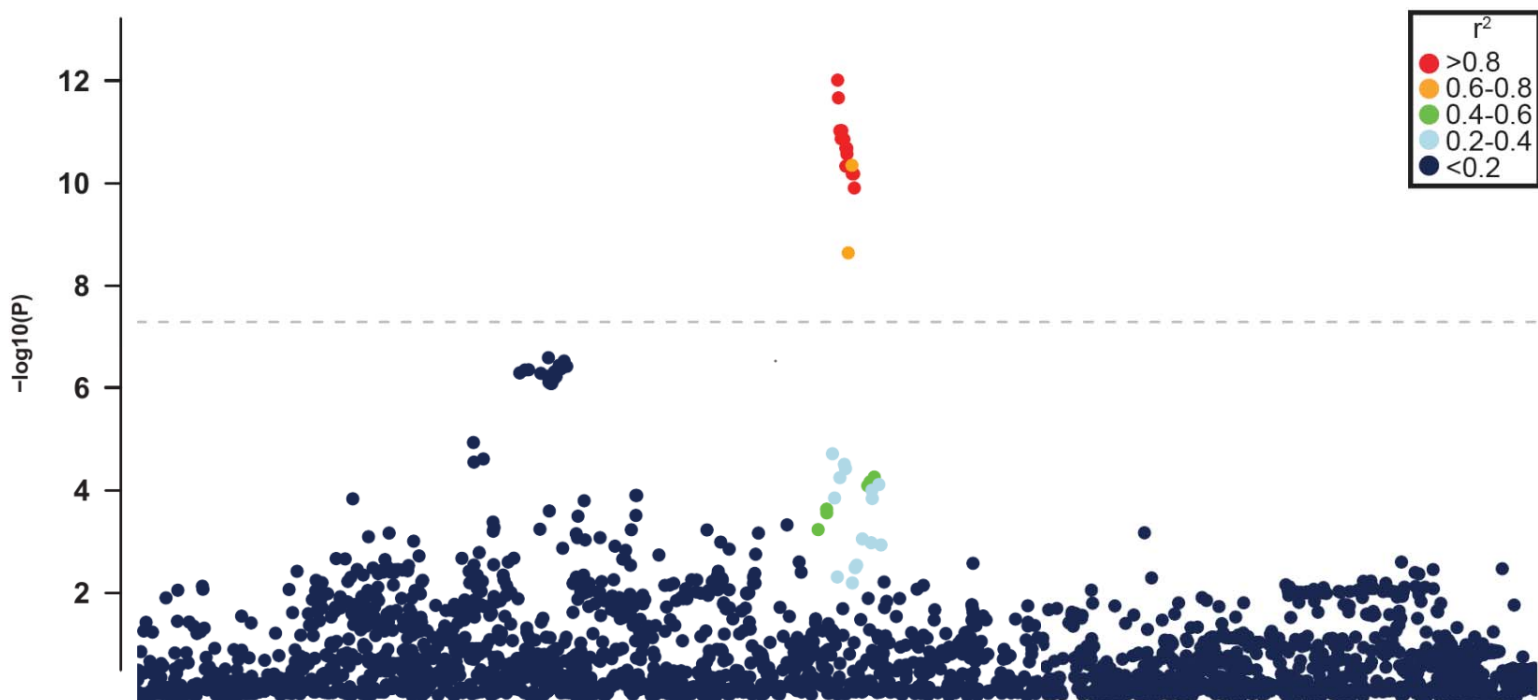

GZ>CP

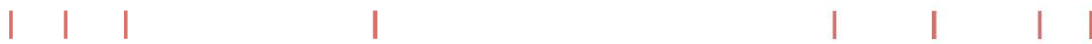

CP>GZ

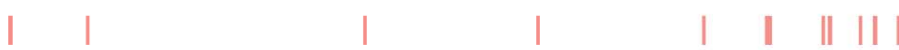

Corrected for total SA

Uncorrected

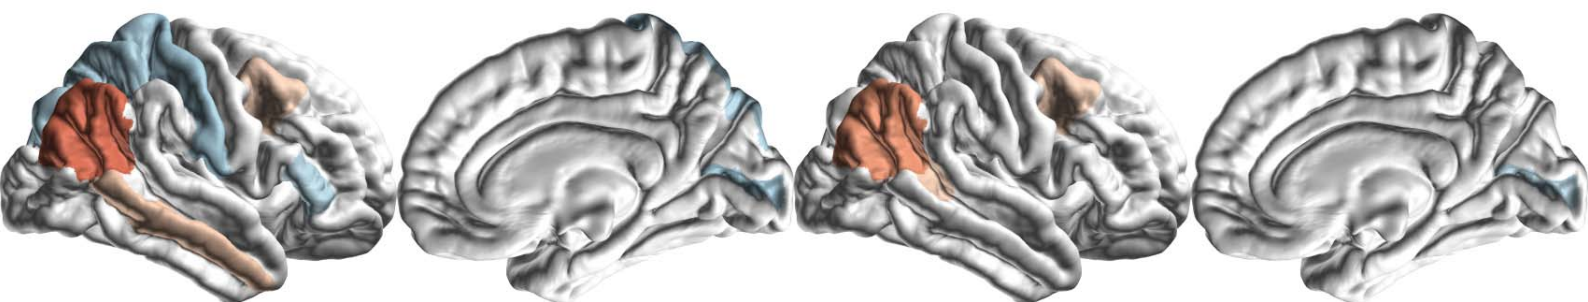

Zscore of the effect allele: T





# Inferior Parietal SA: rs639016

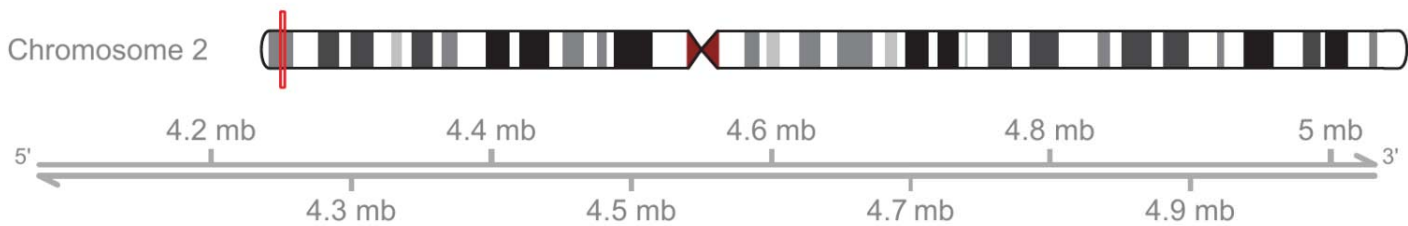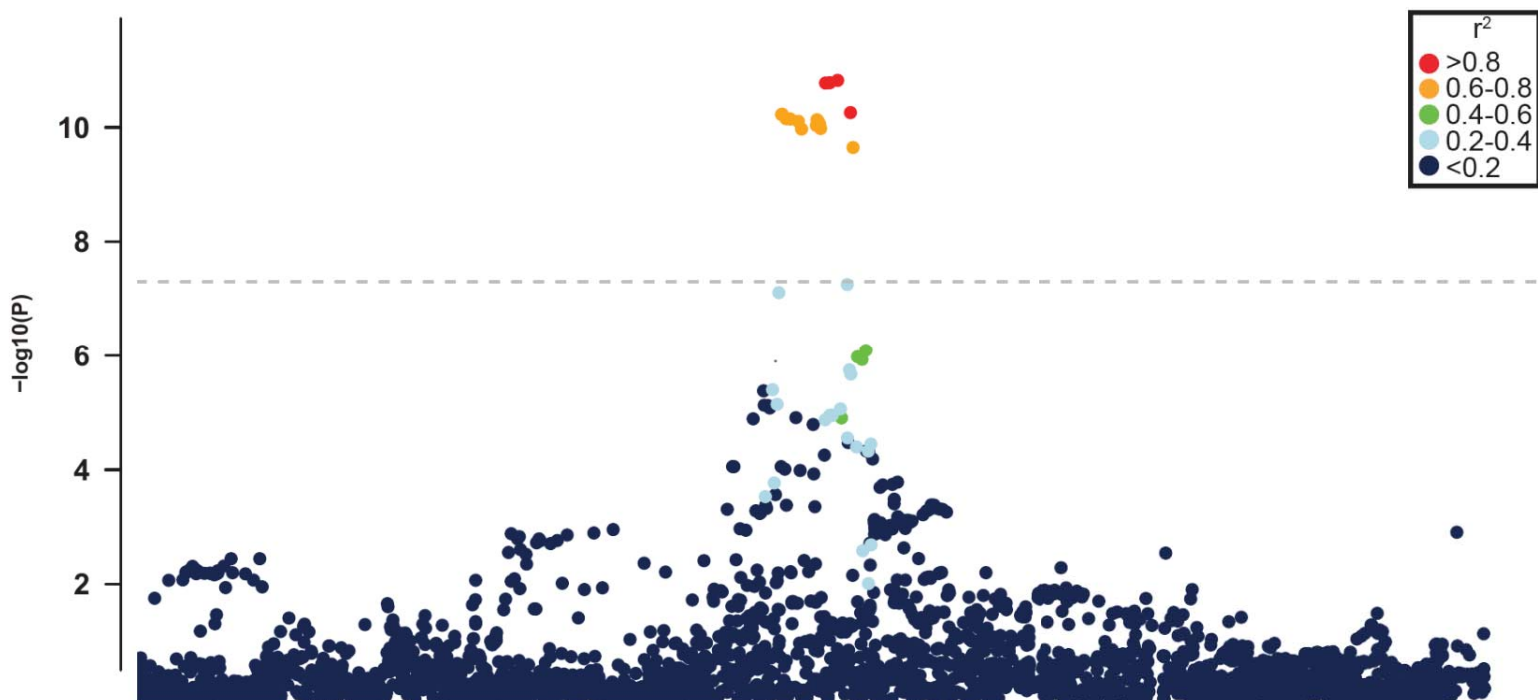

GZ>CP

CP>GZ

Corrected for total SA

Uncorrected



Zscore of the effect allele: C



# Inferior Parietal SA: rs79272390

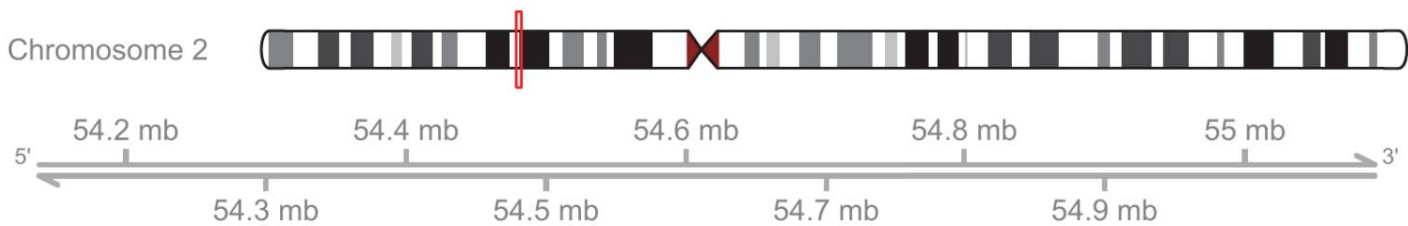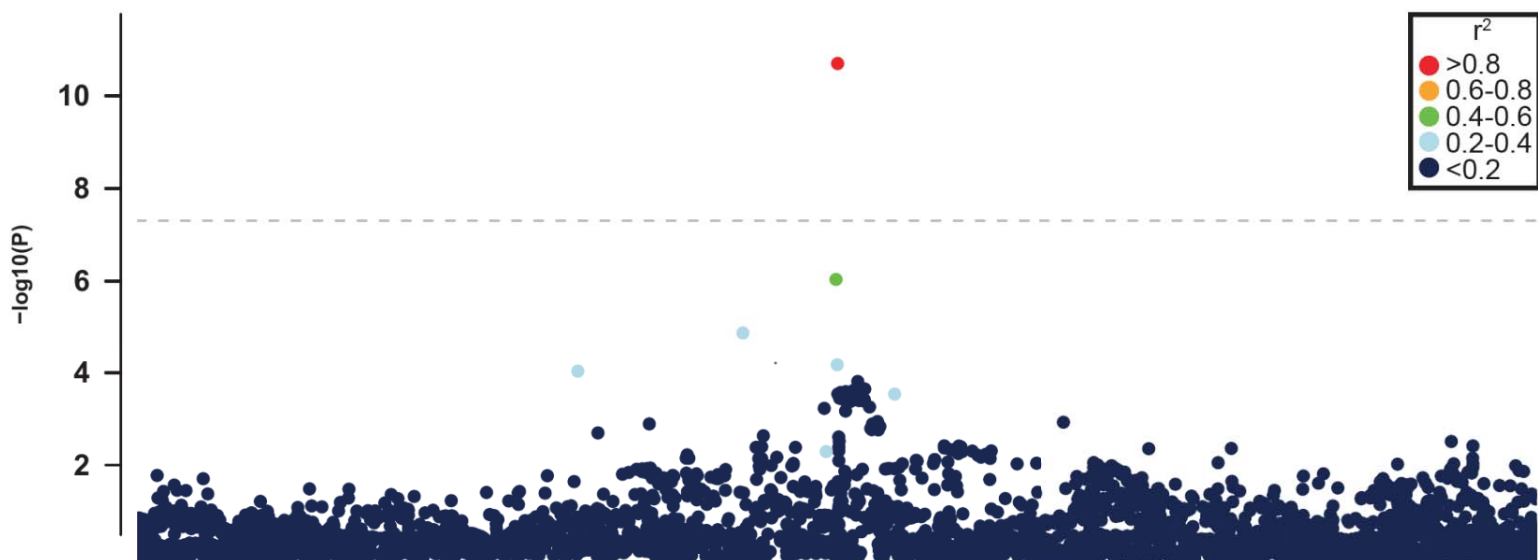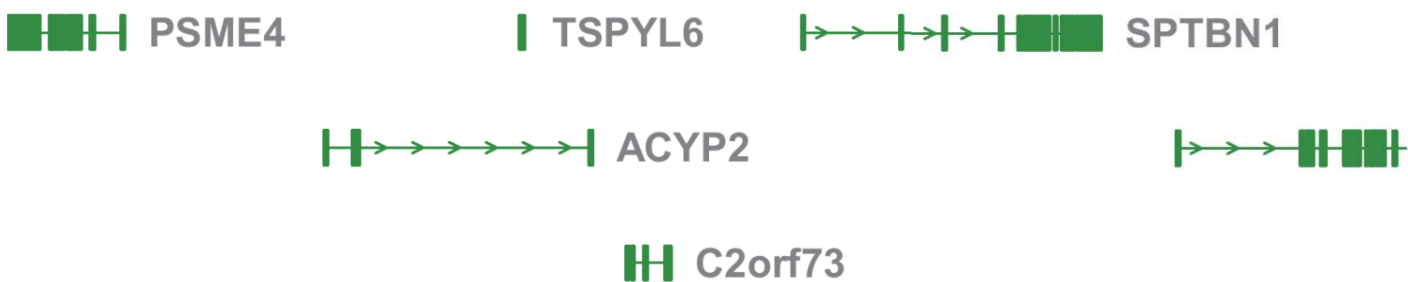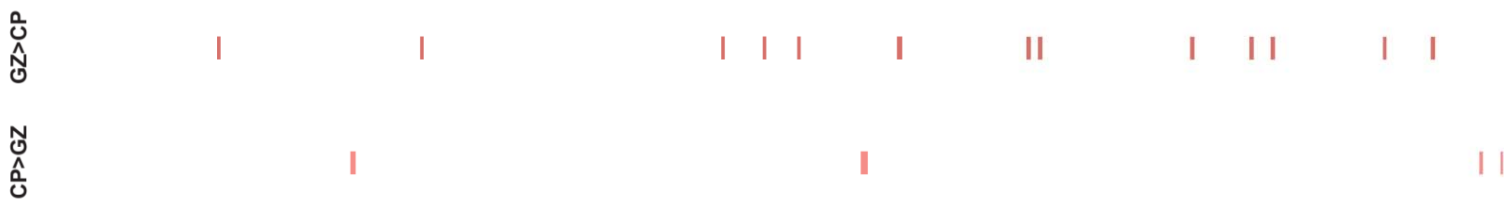

Corrected for total SA

Uncorrected

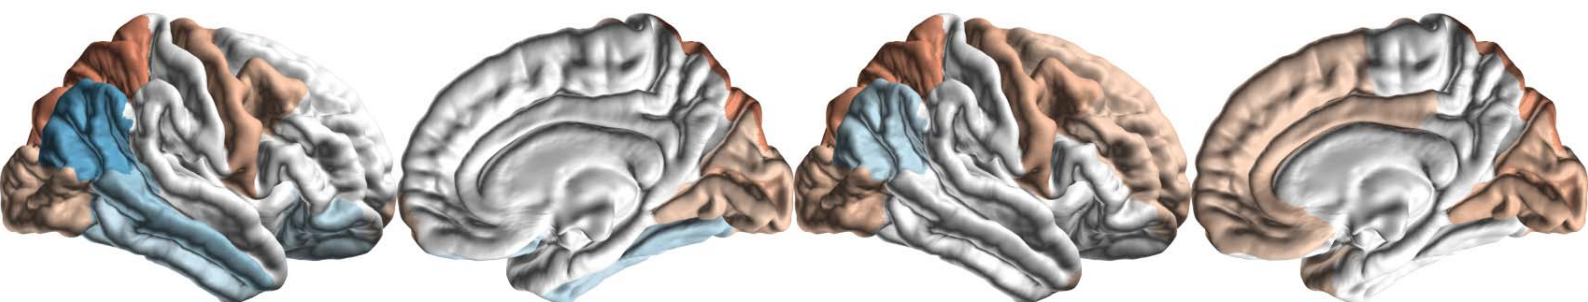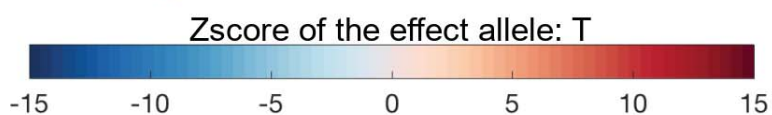

# Inferior Parietal SA: rs13319705

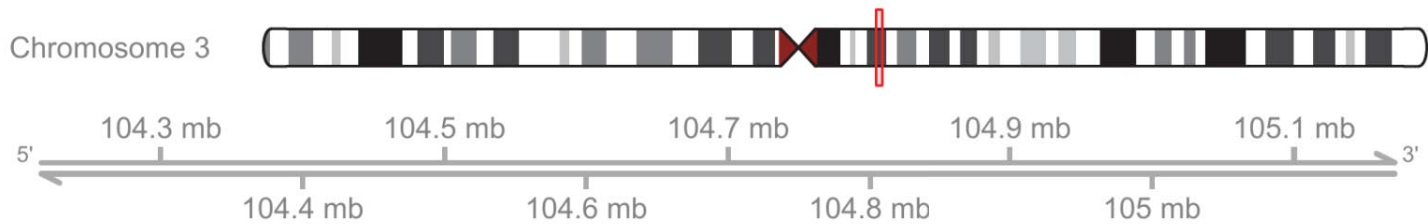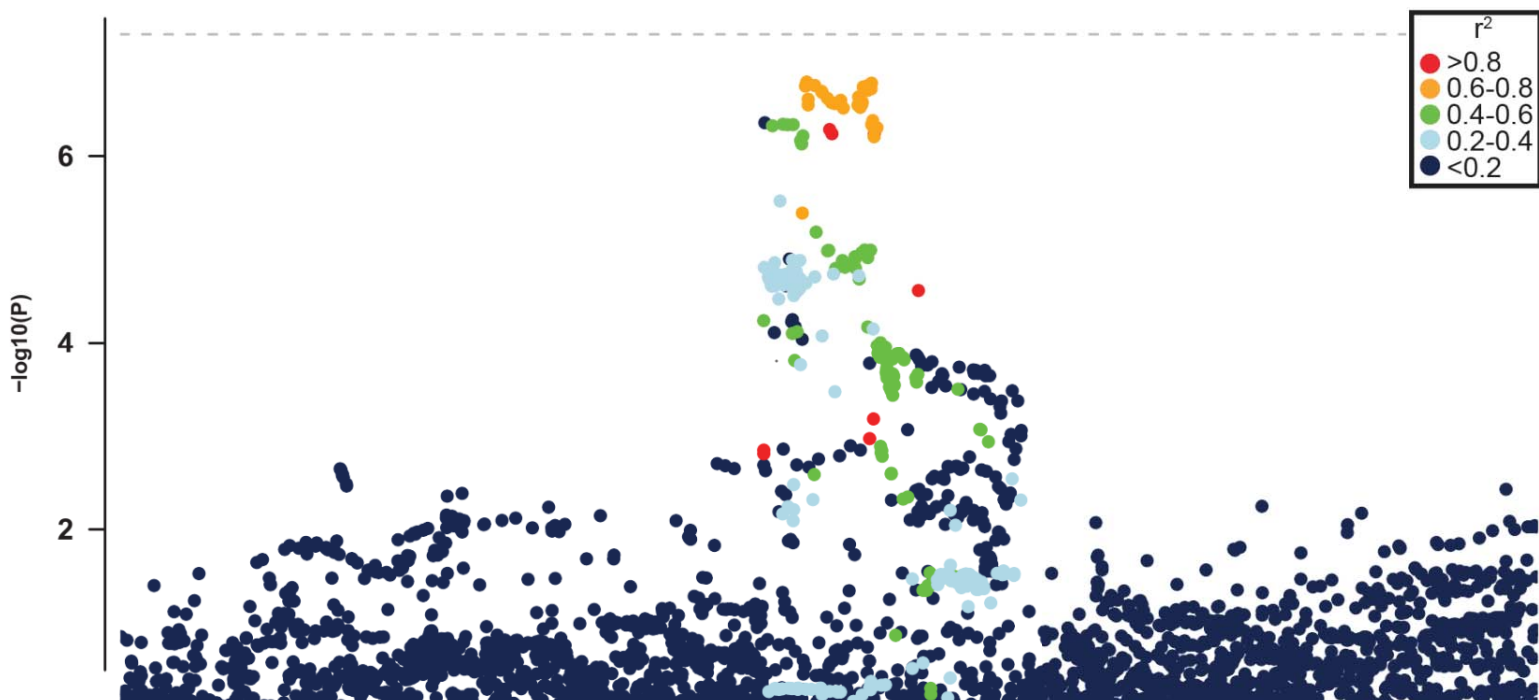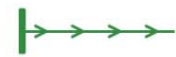

GZ>CP

CP>GZ

Corrected for total SA

Uncorrected

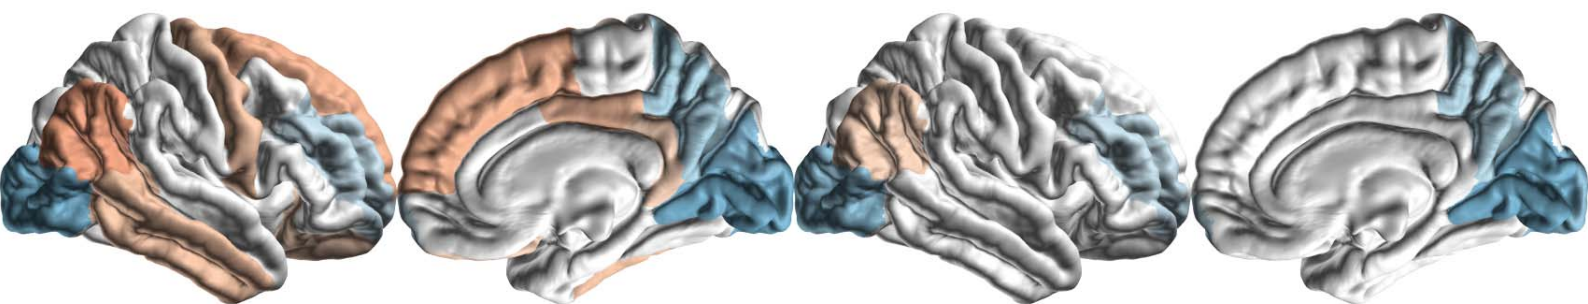

Zscore of the effect allele: T





# Inferior Parietal SA: rs17019370

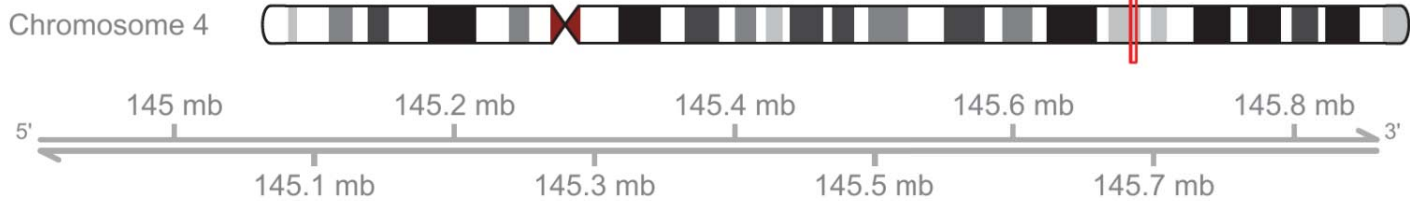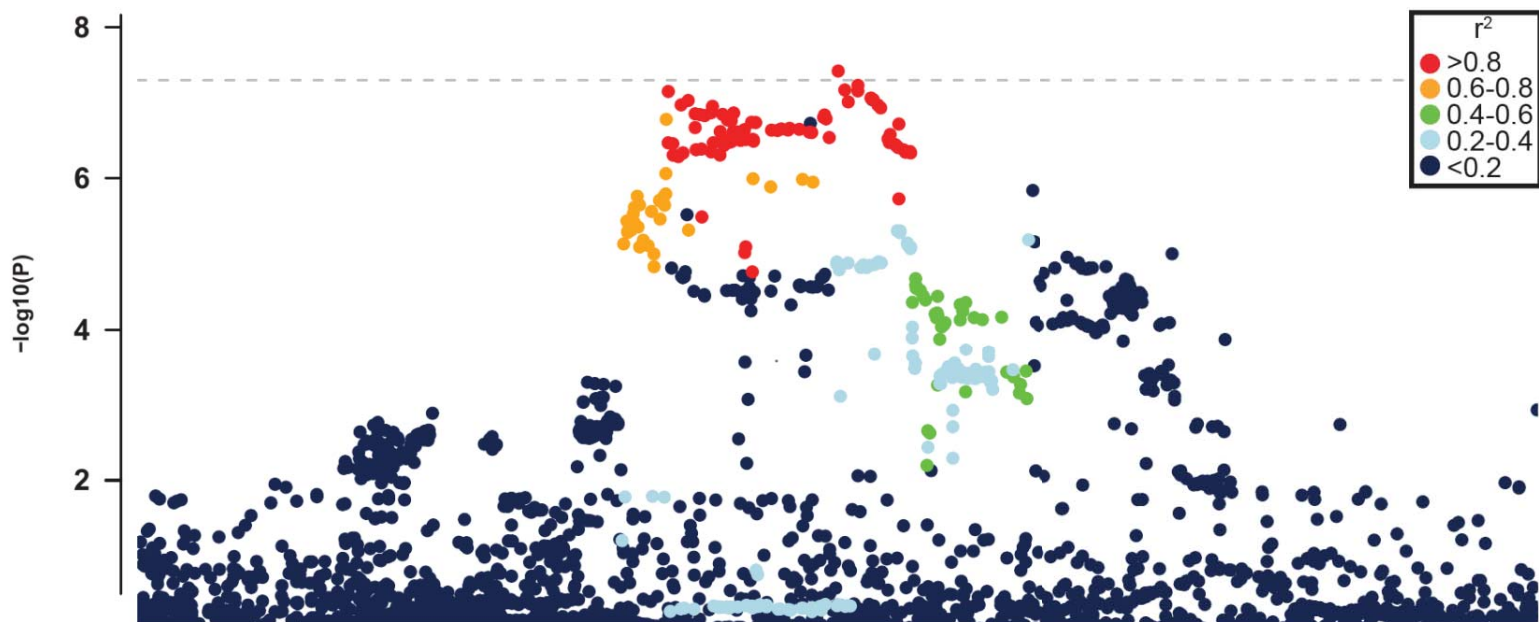

GYPB

HHIP

GYPB

GZ>CP  
CP>GZ

Corrected for total SA

Uncorrected

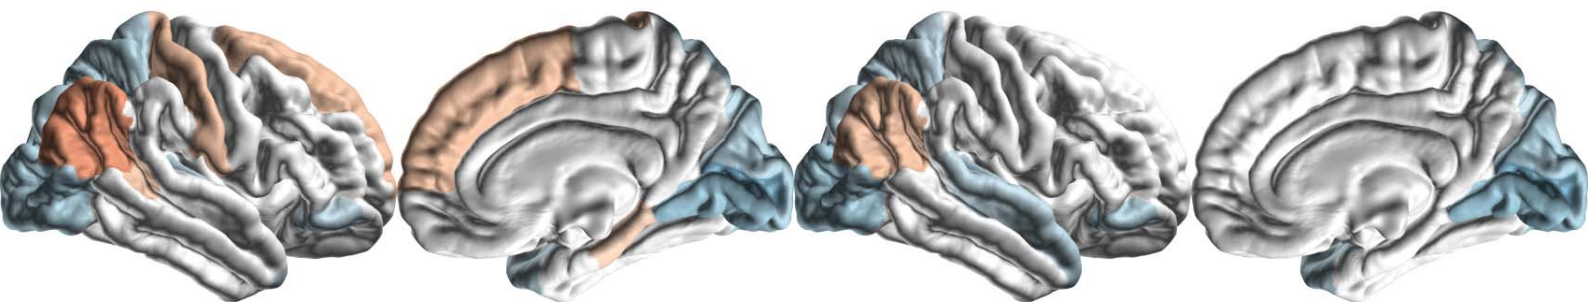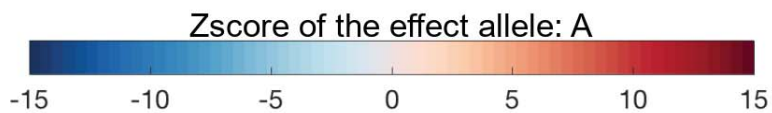

# Inferior Parietal SA: rs27540

Chromosome 5

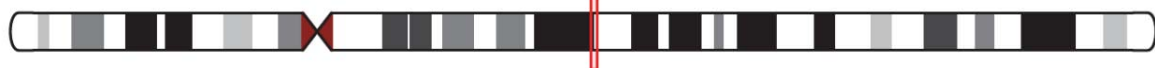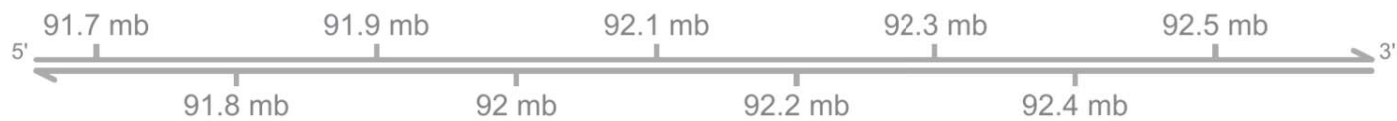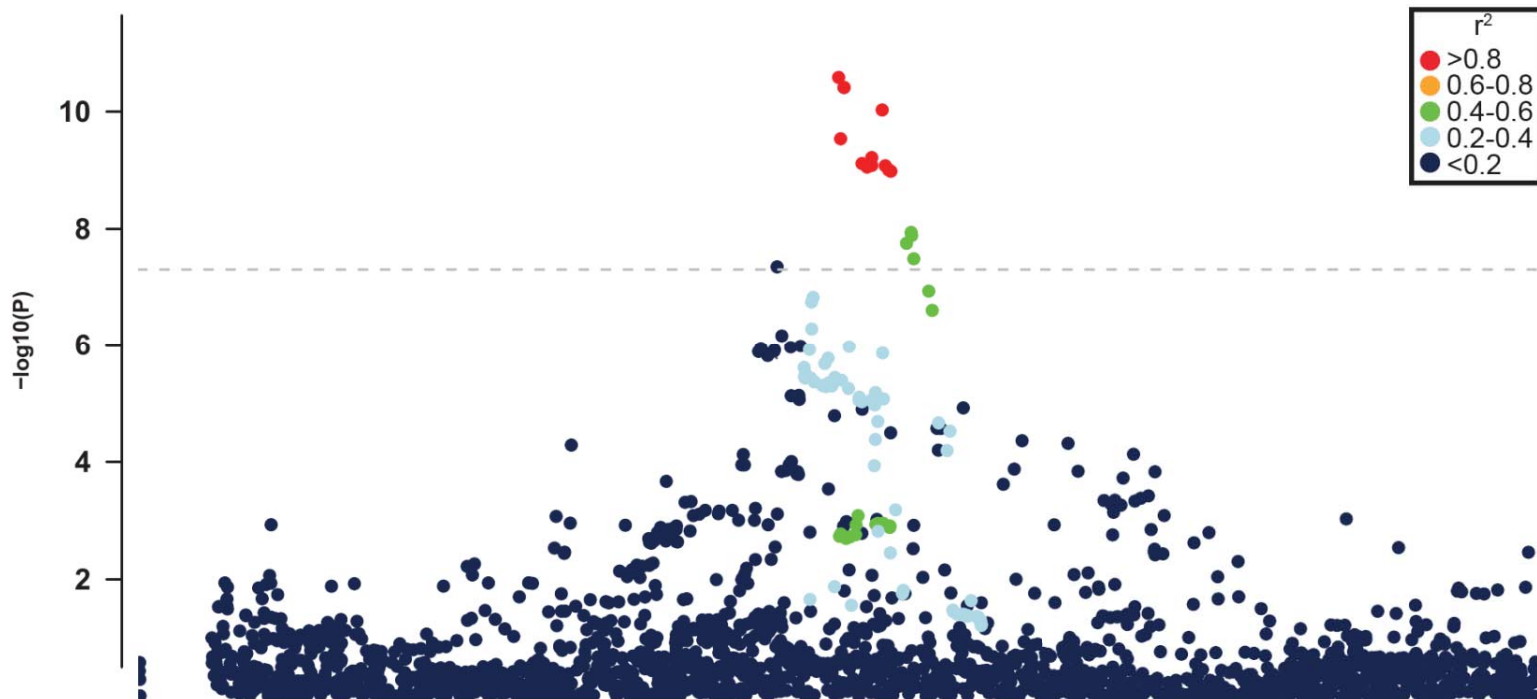

GZ>CP

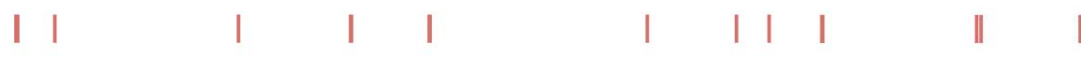

CP>GZ

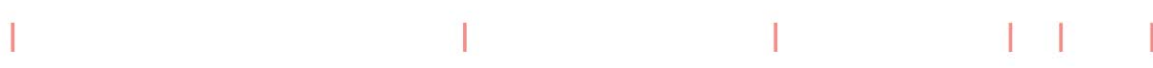

Corrected for total SA

Uncorrected

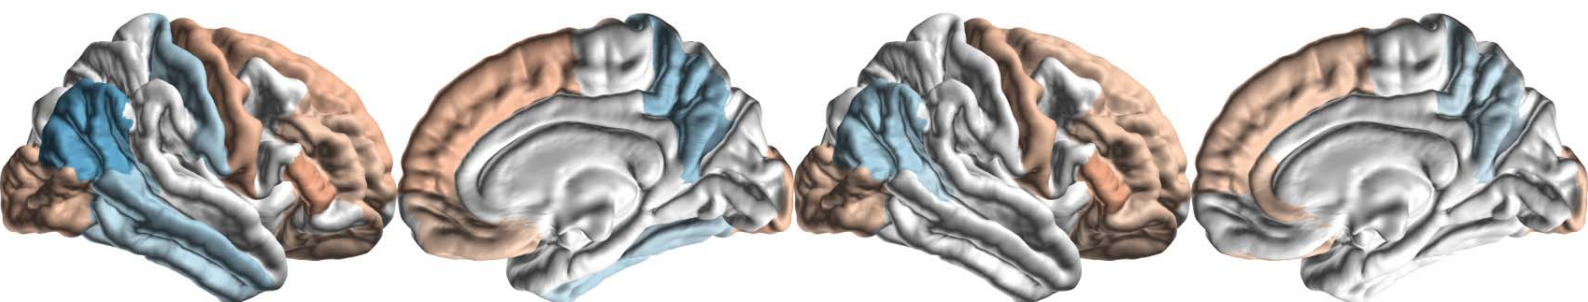

Zscore of the effect allele: A

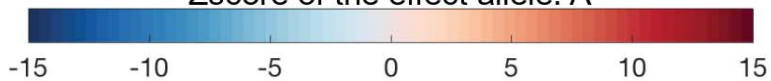

# Inferior Parietal SA: rs62399042

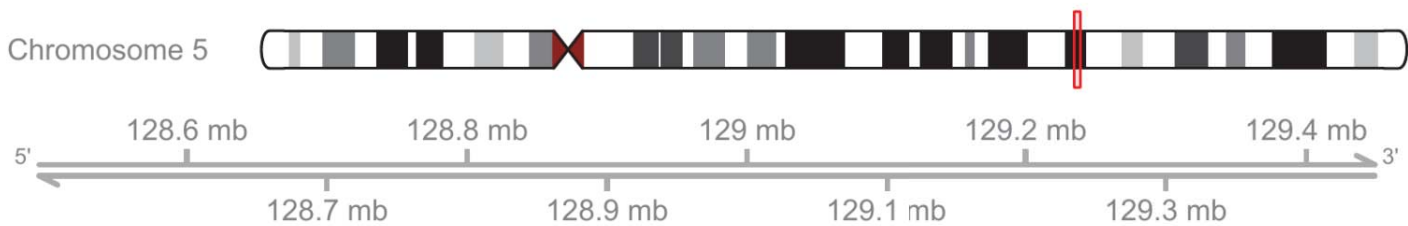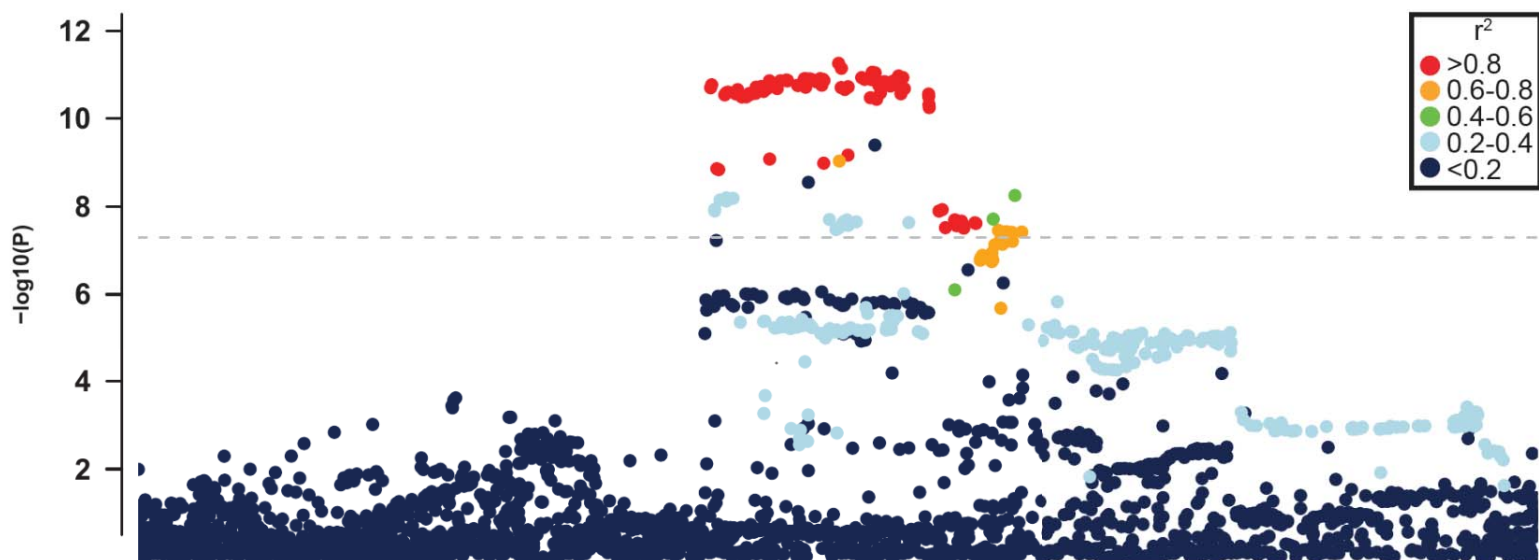

ADAMTS19

KIAA1024L

CP>GZ

GZ>CP

Corrected for total SA

Uncorrected

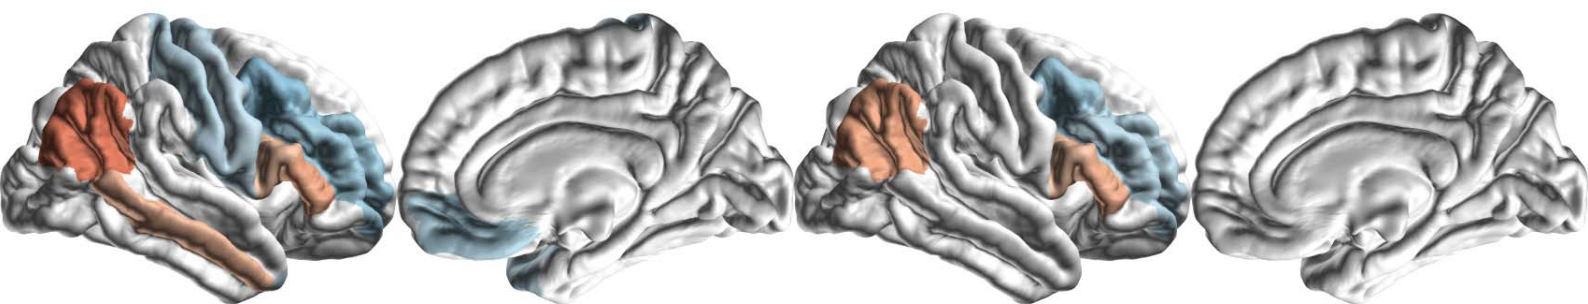

Zscore of the effect allele: C

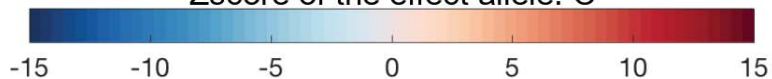



# Inferior Parietal SA: rs2336714

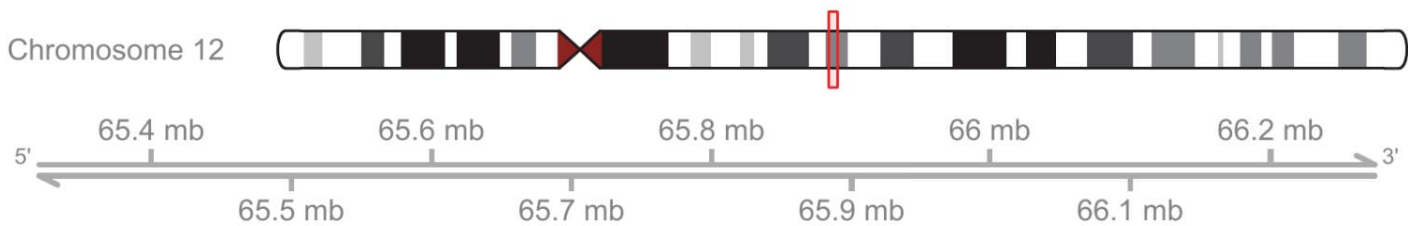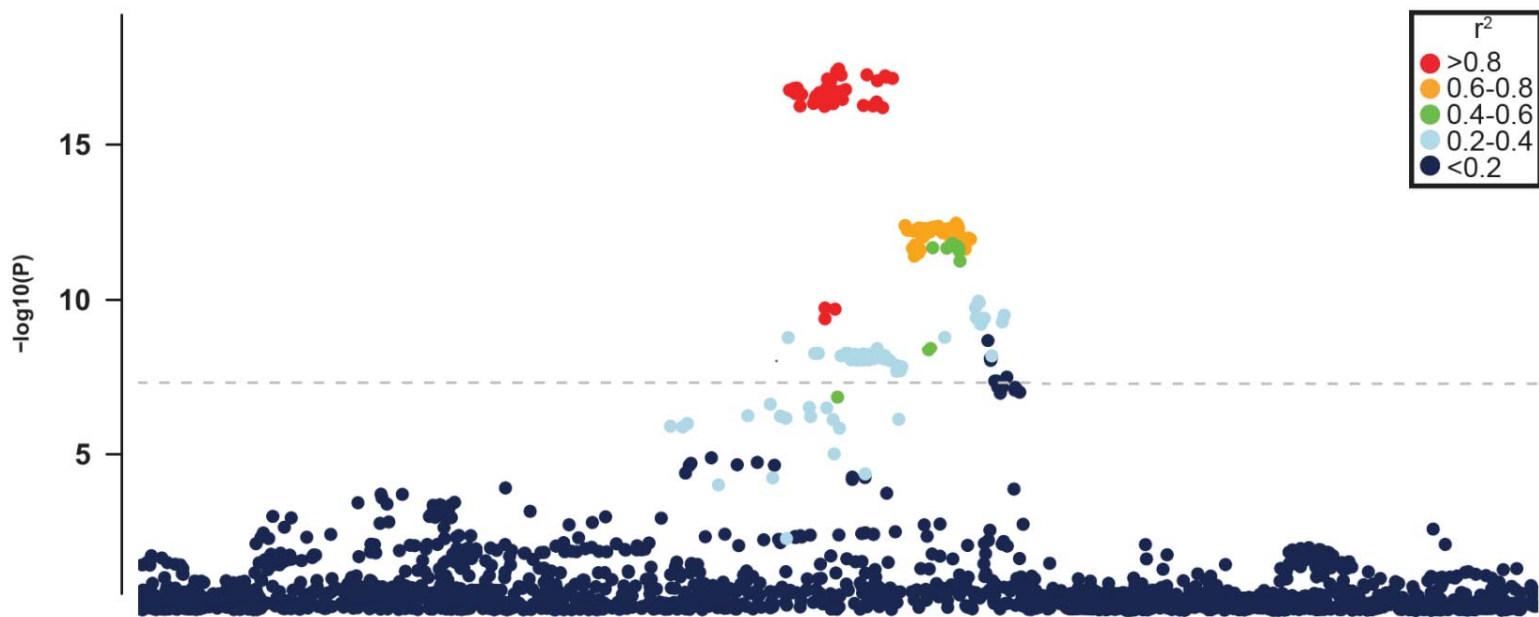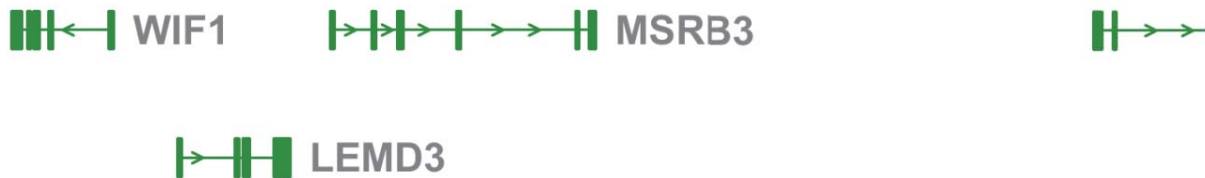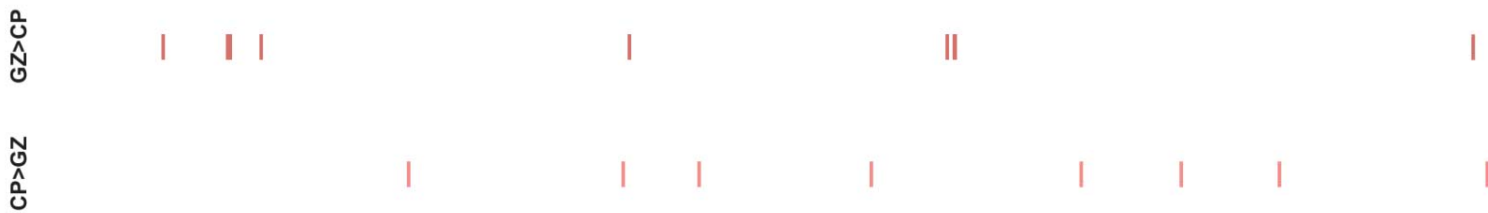

Corrected for total SA

Uncorrected

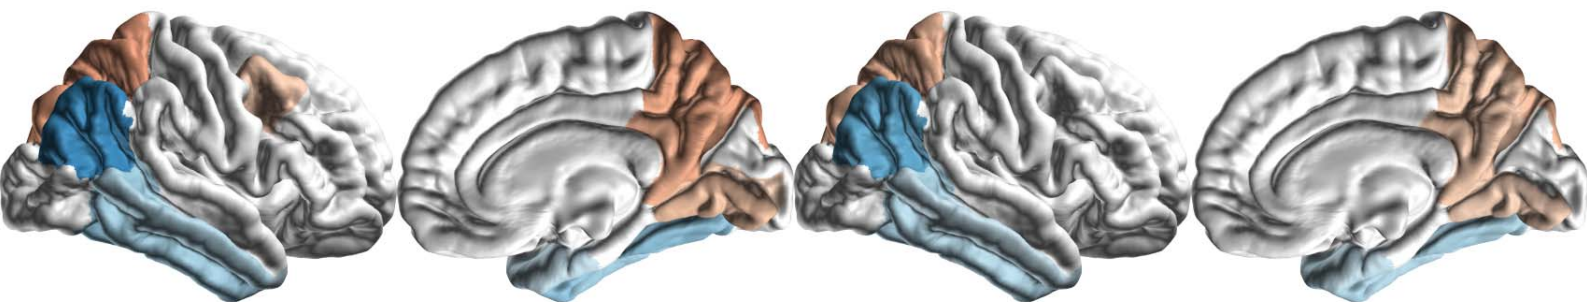

Zscore of the effect allele: T



# Inferior Parietal SA: rs68175985

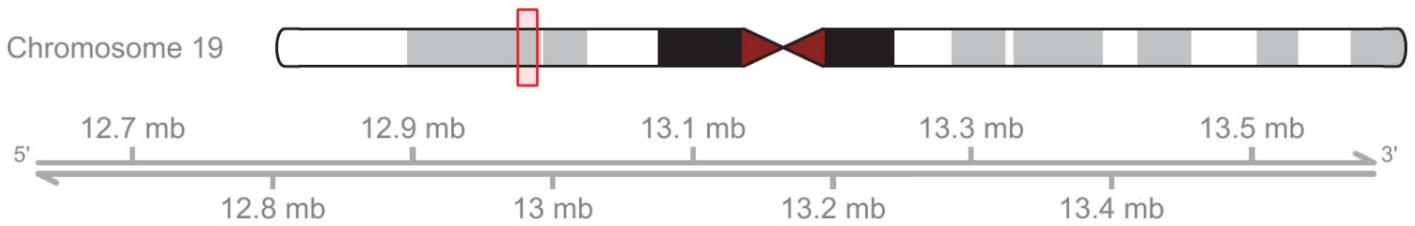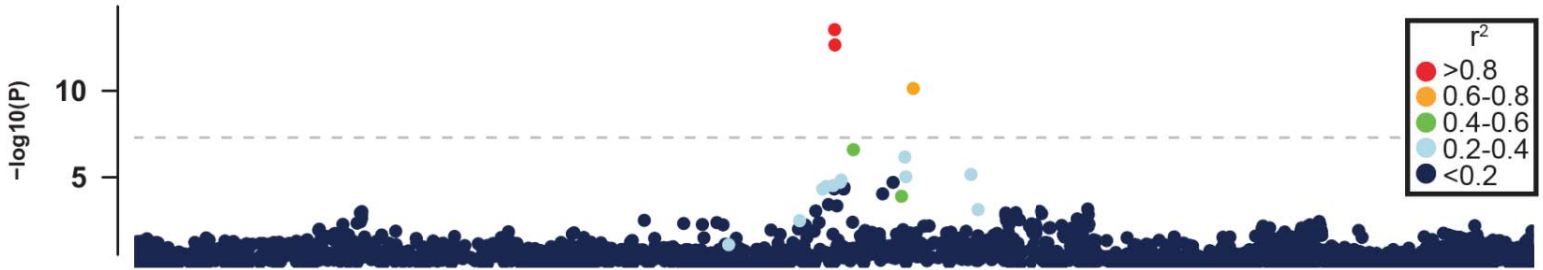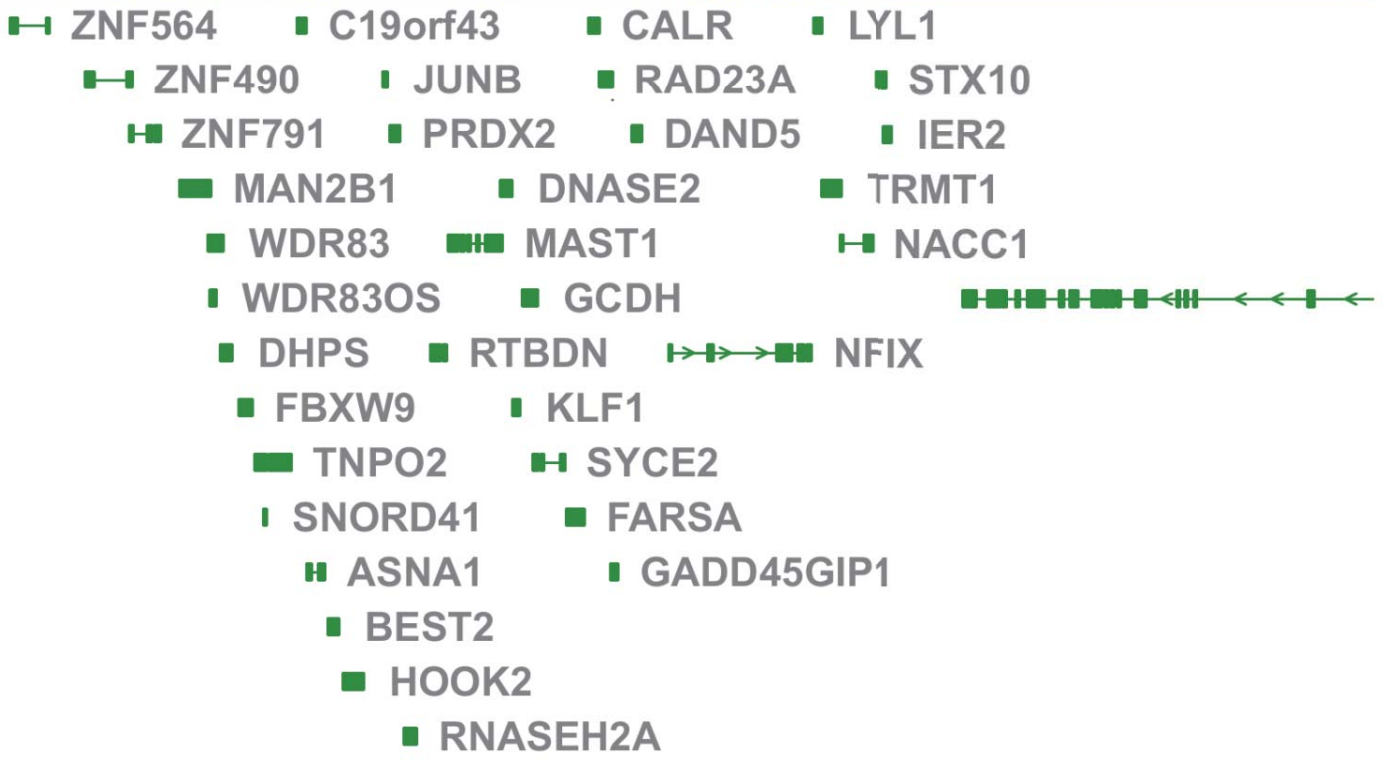

CP>GZZ>CP

Corrected for total SA

Uncorrected

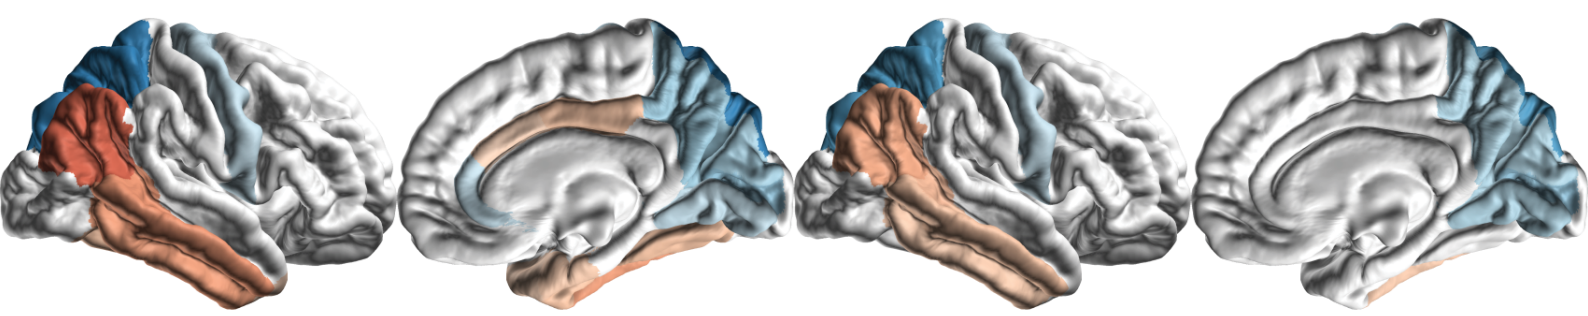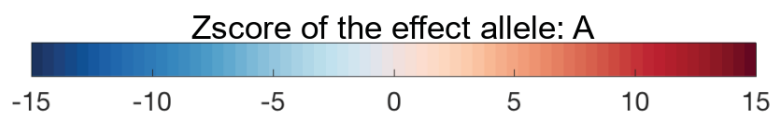

# Inferior Parietal SA: rs4437022

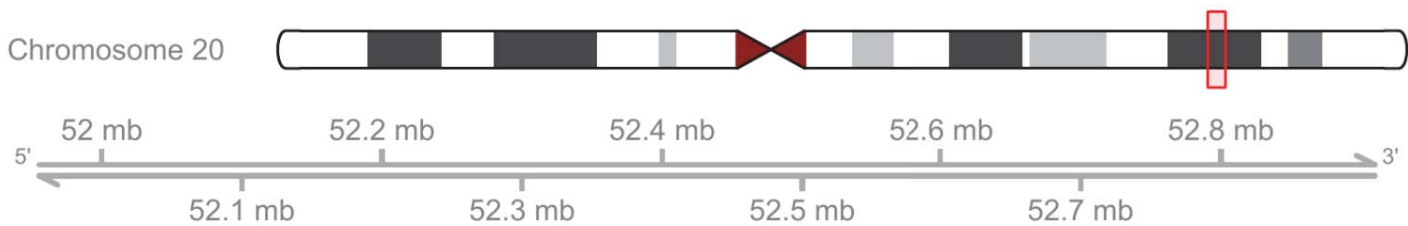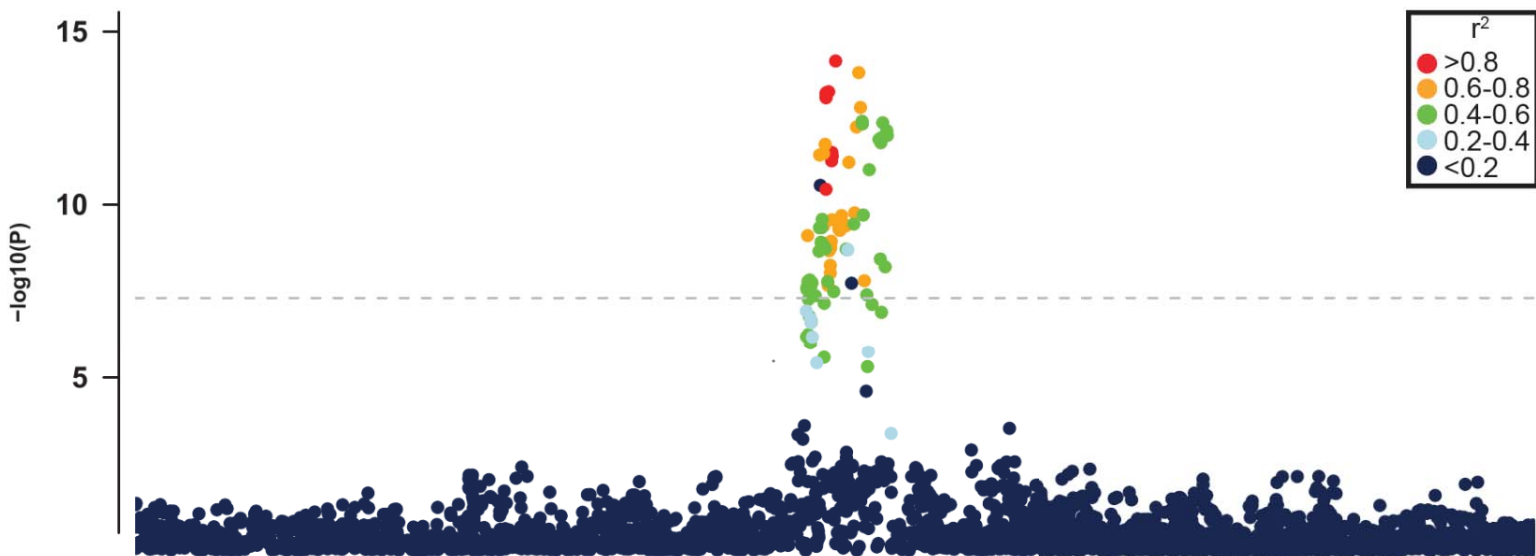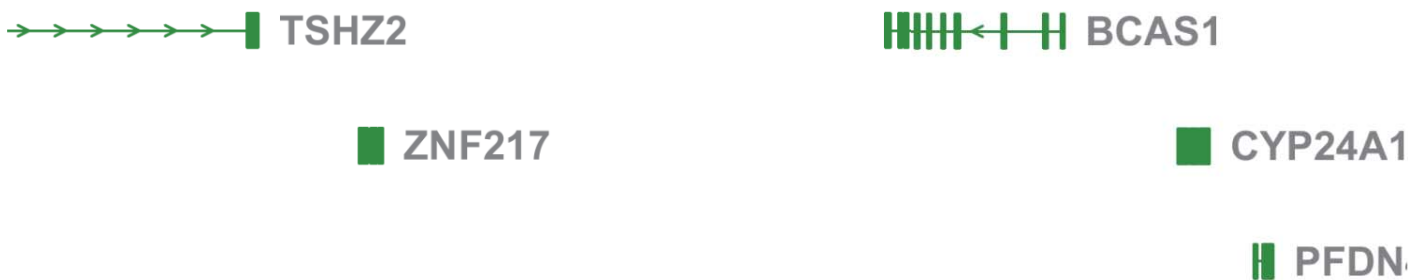

CP>GZ  
GZ>CP

Corrected for total SA

Uncorrected

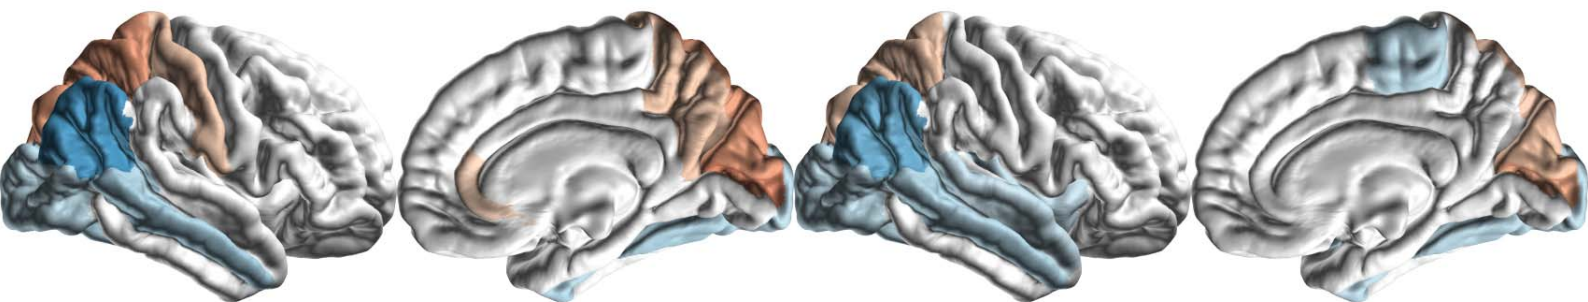

Zscore of the effect allele: A





# Posterior Cingulate SA: rs11161942

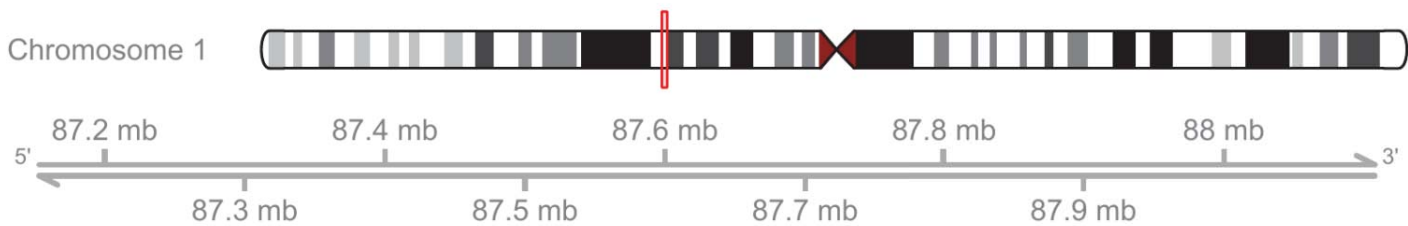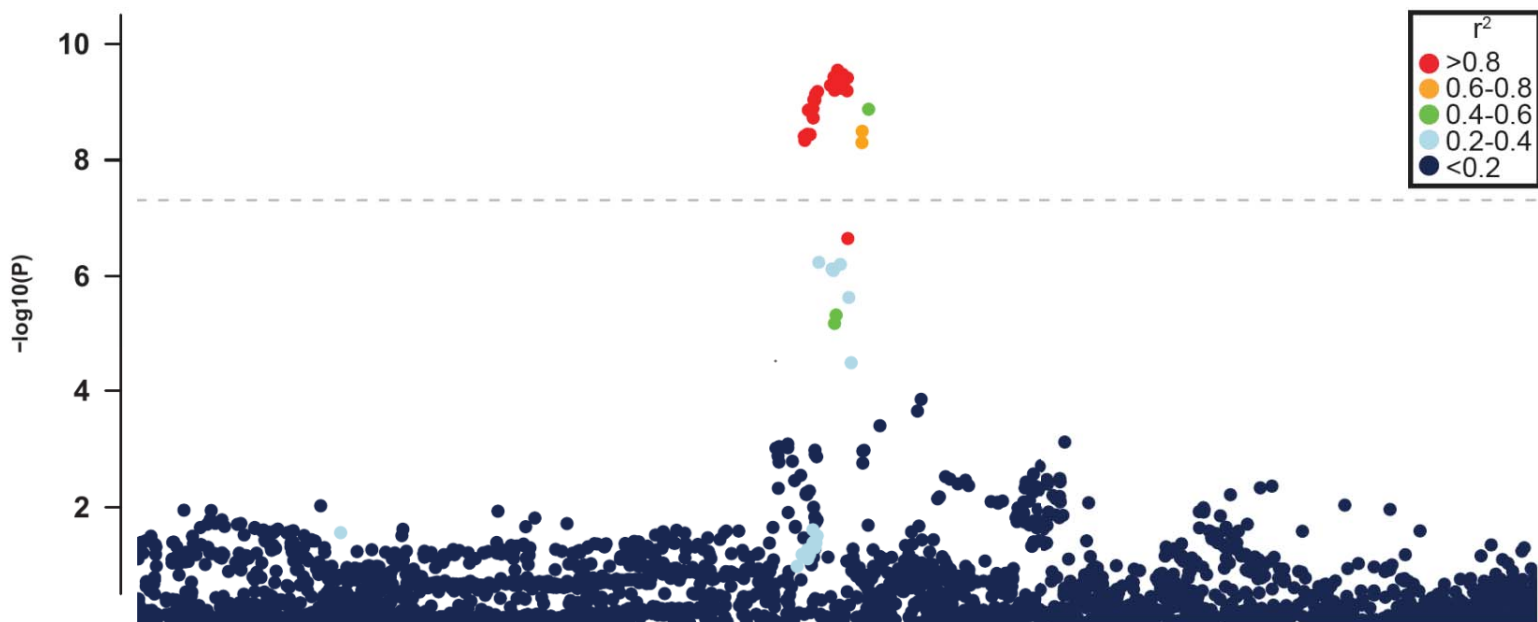

SH3GLB1 HS2ST1 LMO4

SEP15

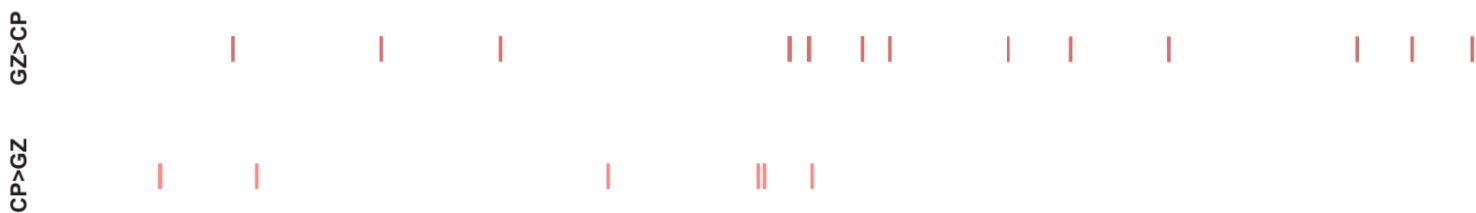

Corrected for total SA

Uncorrected

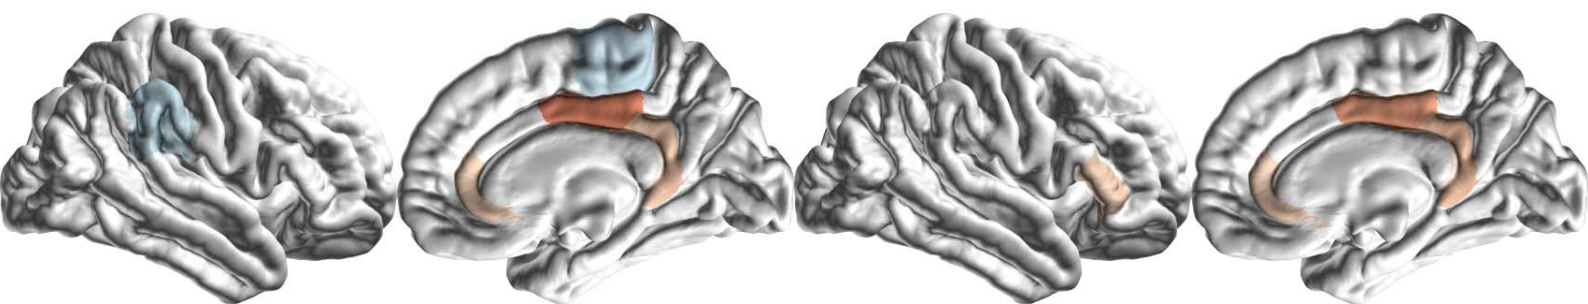

# Posterior Cingulate SA: rs11695609

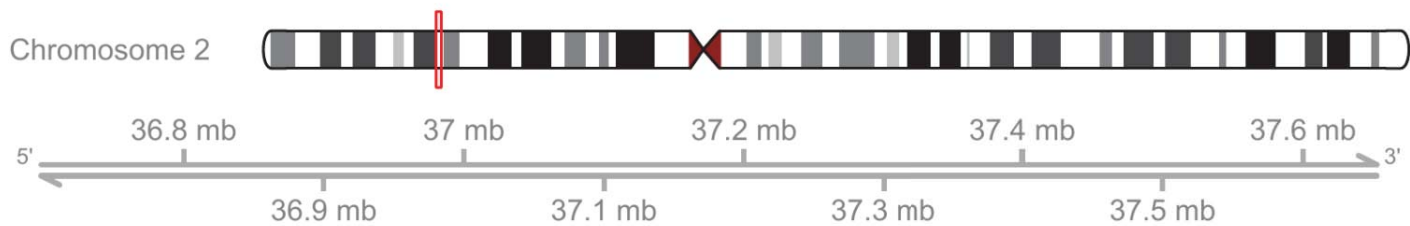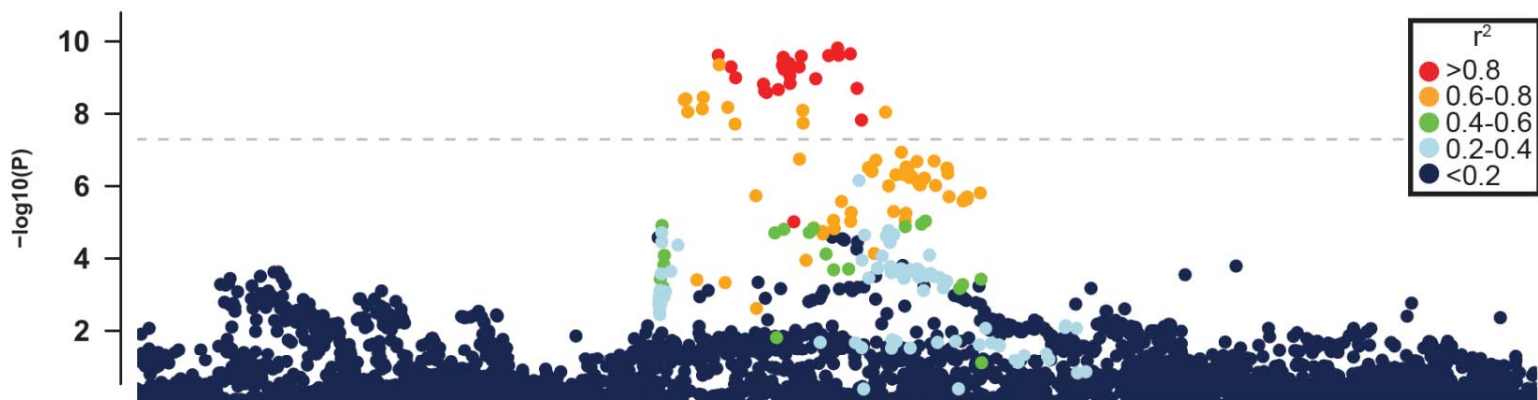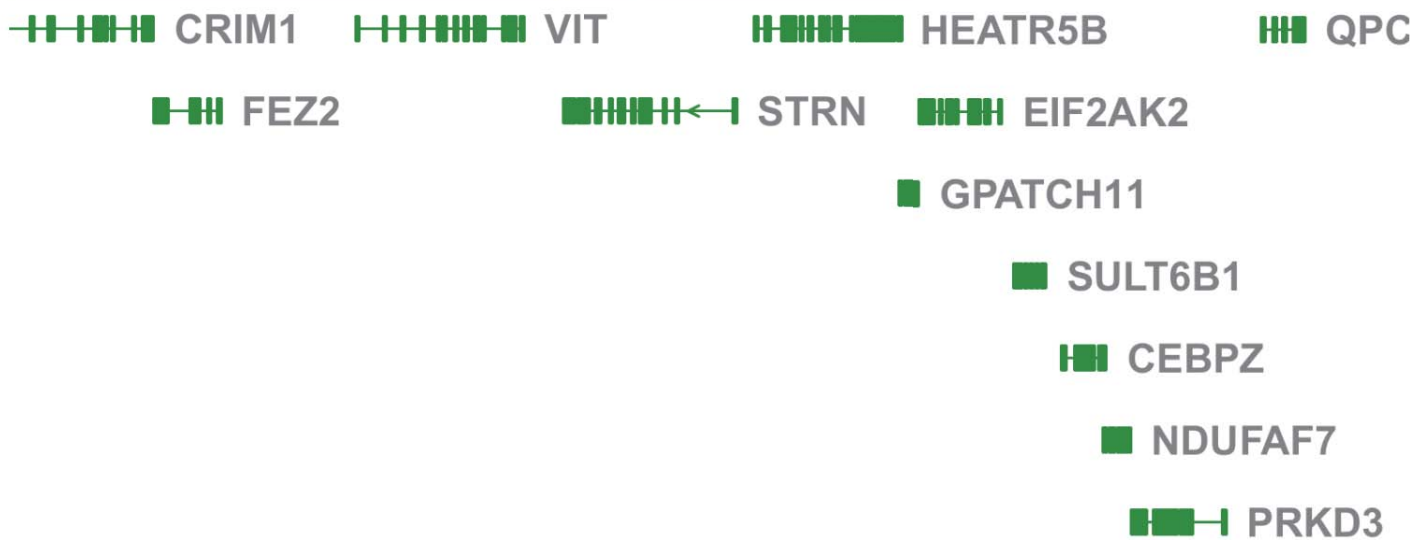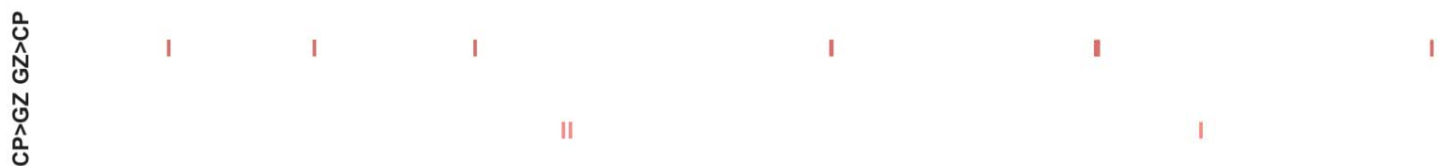

Corrected for total SA

Uncorrected

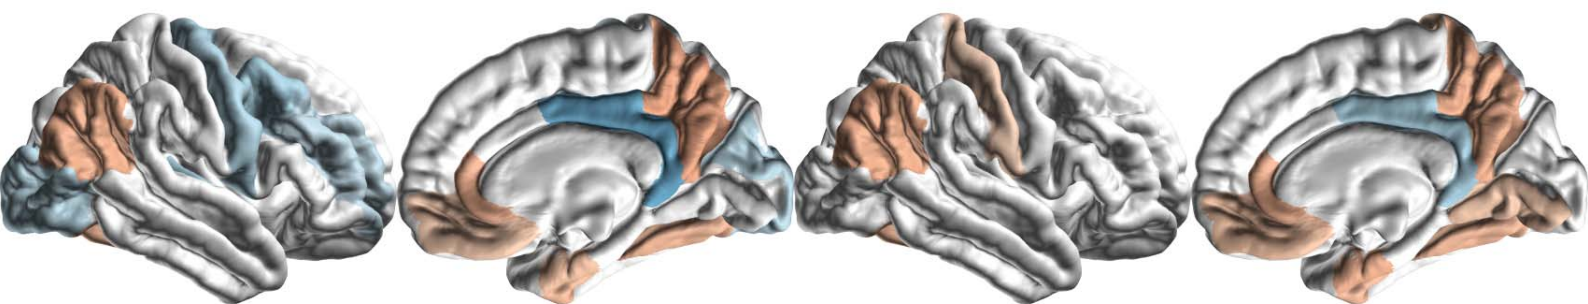

Zscore of the effect allele: T



# Posterior Cingulate SA: rs72761270

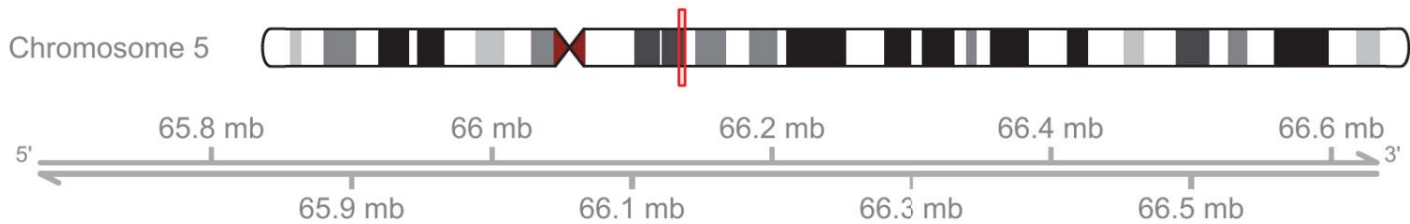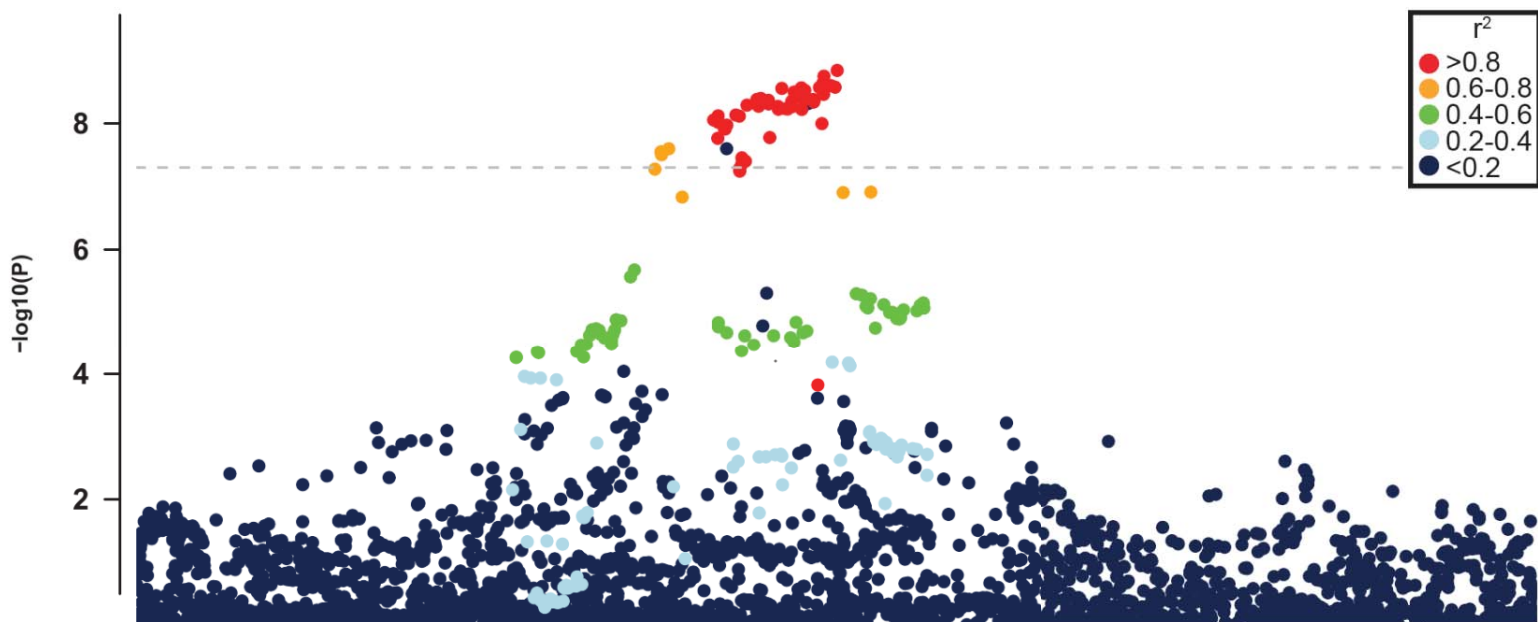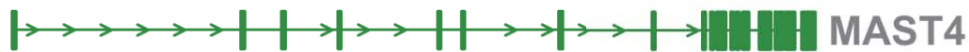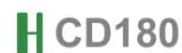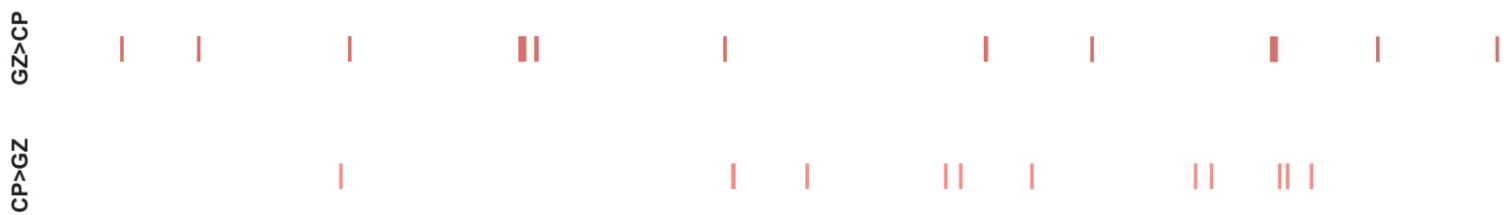

Corrected for total SA

Uncorrected

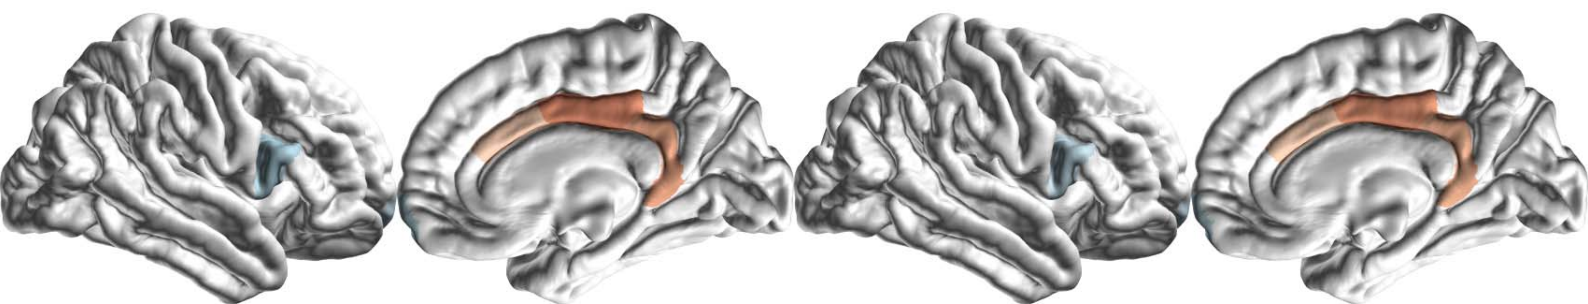

Zscore of the effect allele: T





# Posterior Cingulate SA: rs12764880

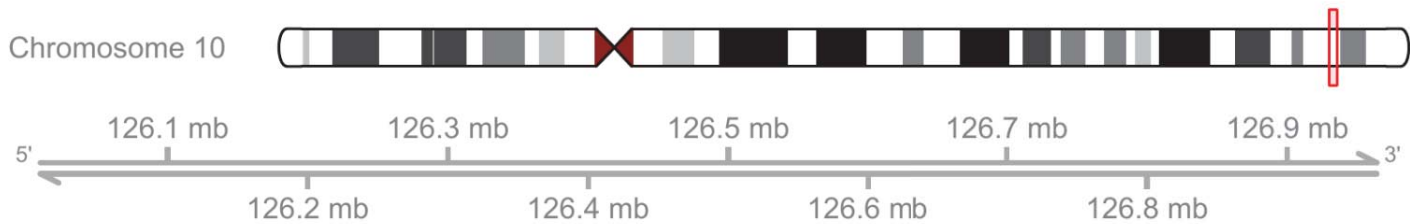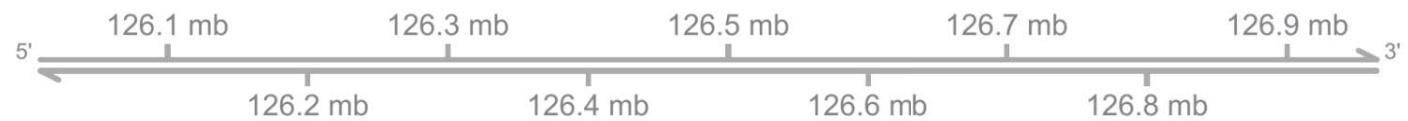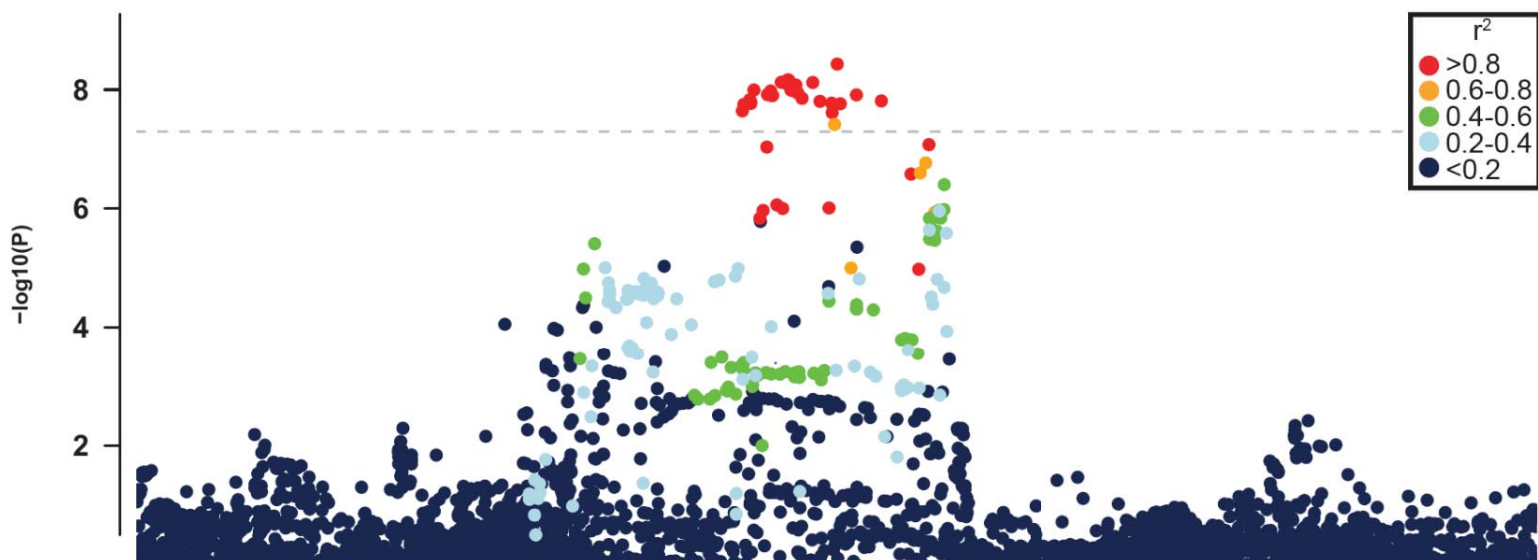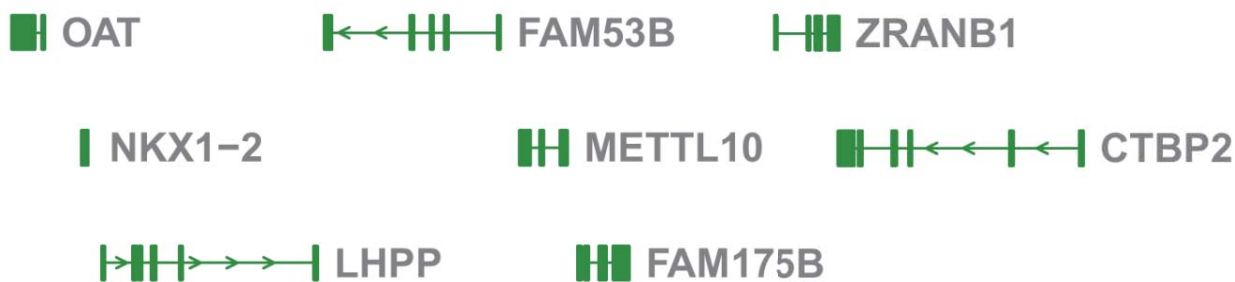

GZ>CP  
CP>GZ

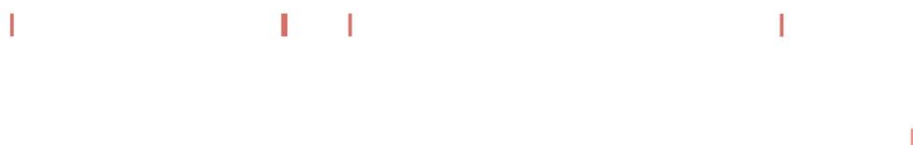

Corrected for total SA

Uncorrected

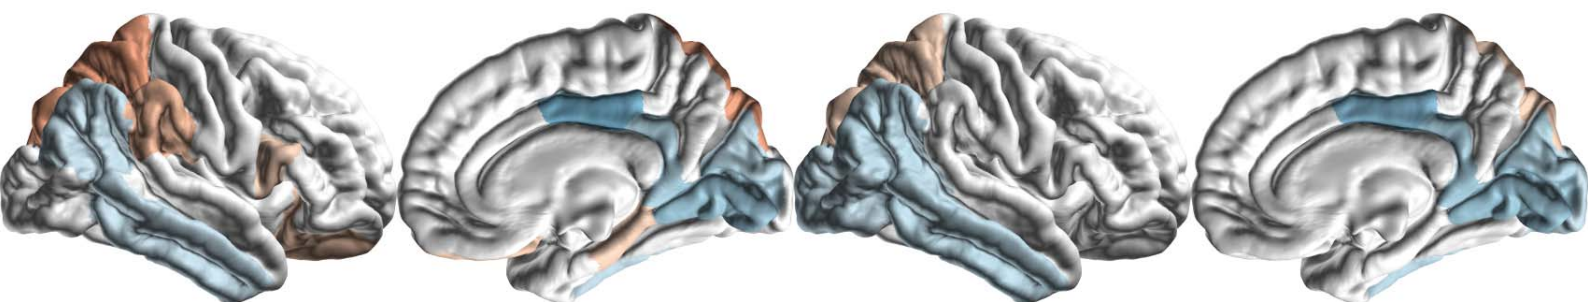

Zscore of the effect allele: T



# Isthmus Cingulate SA: rs3770776

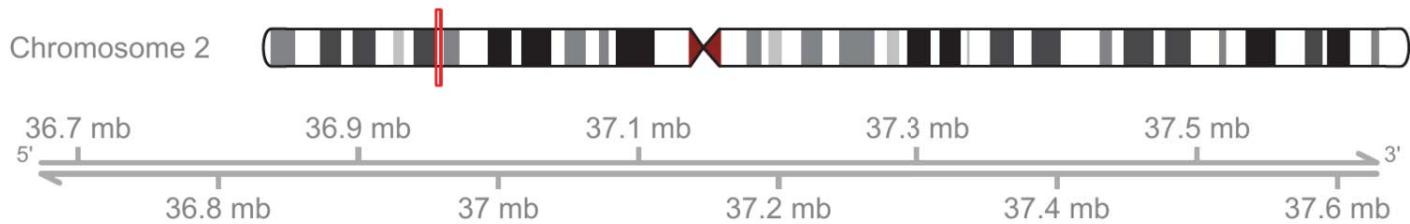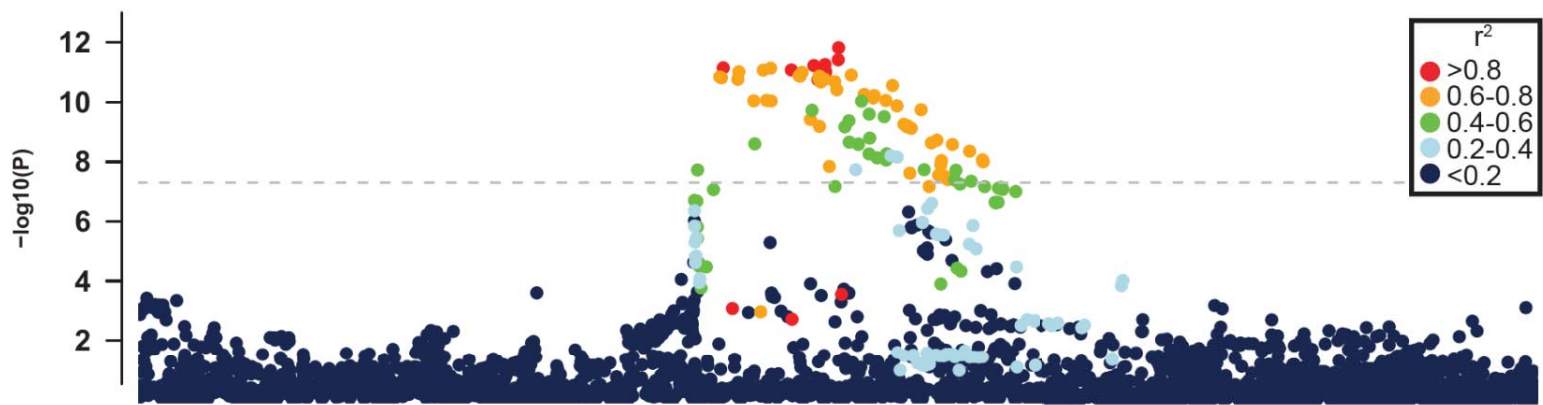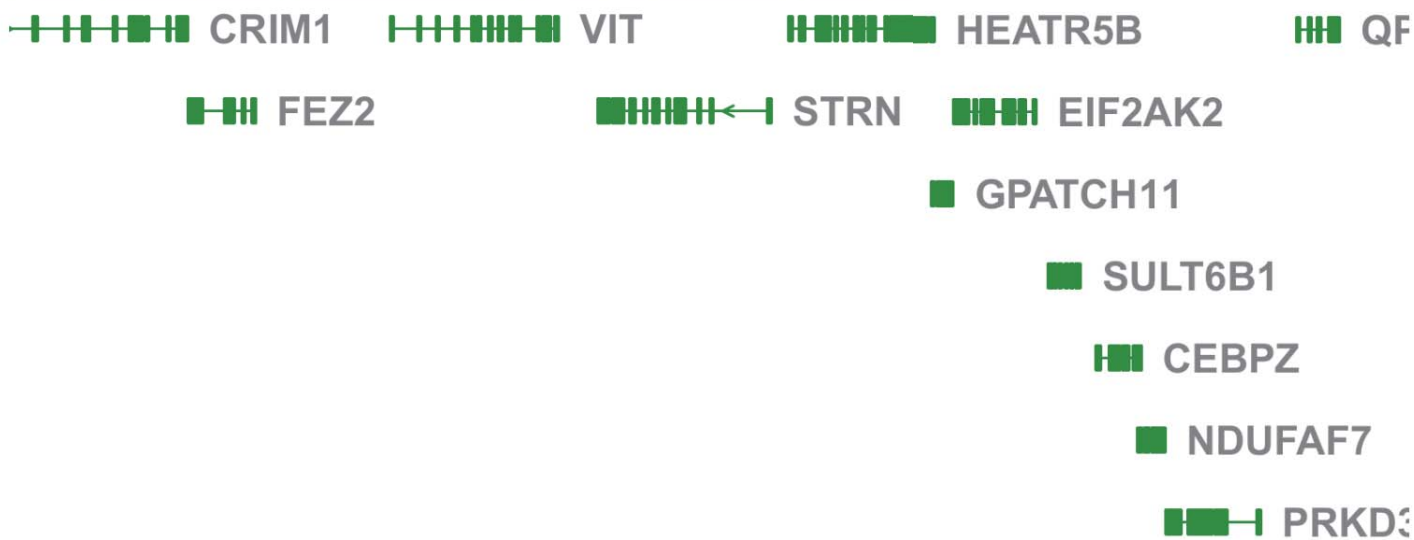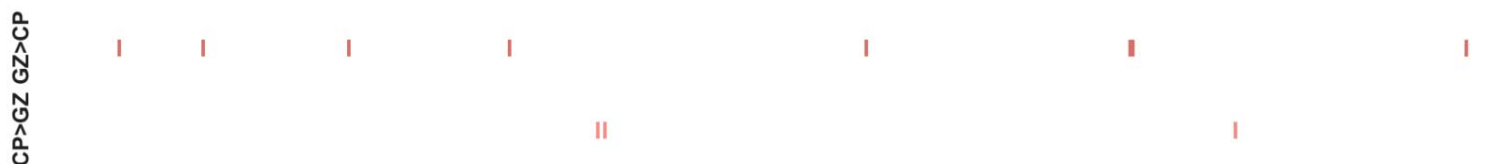

Corrected for total SA

Uncorrected

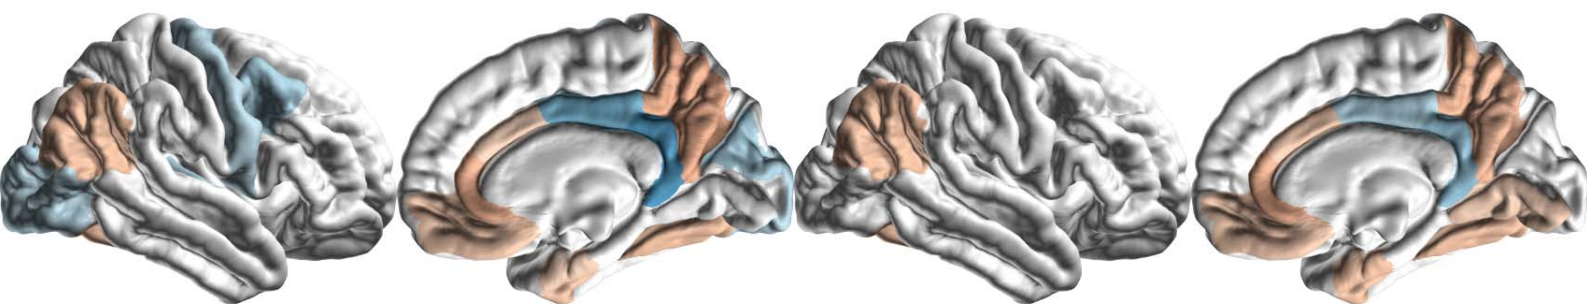

Zscore of the effect allele: A



# Isthmus Cingulate SA: rs1123680

Chromosome 12

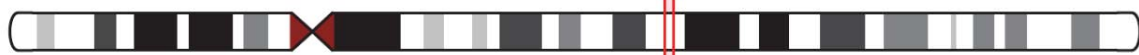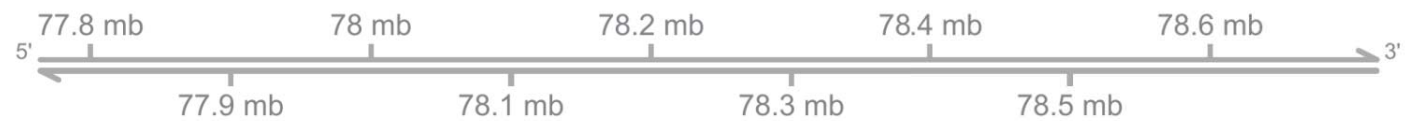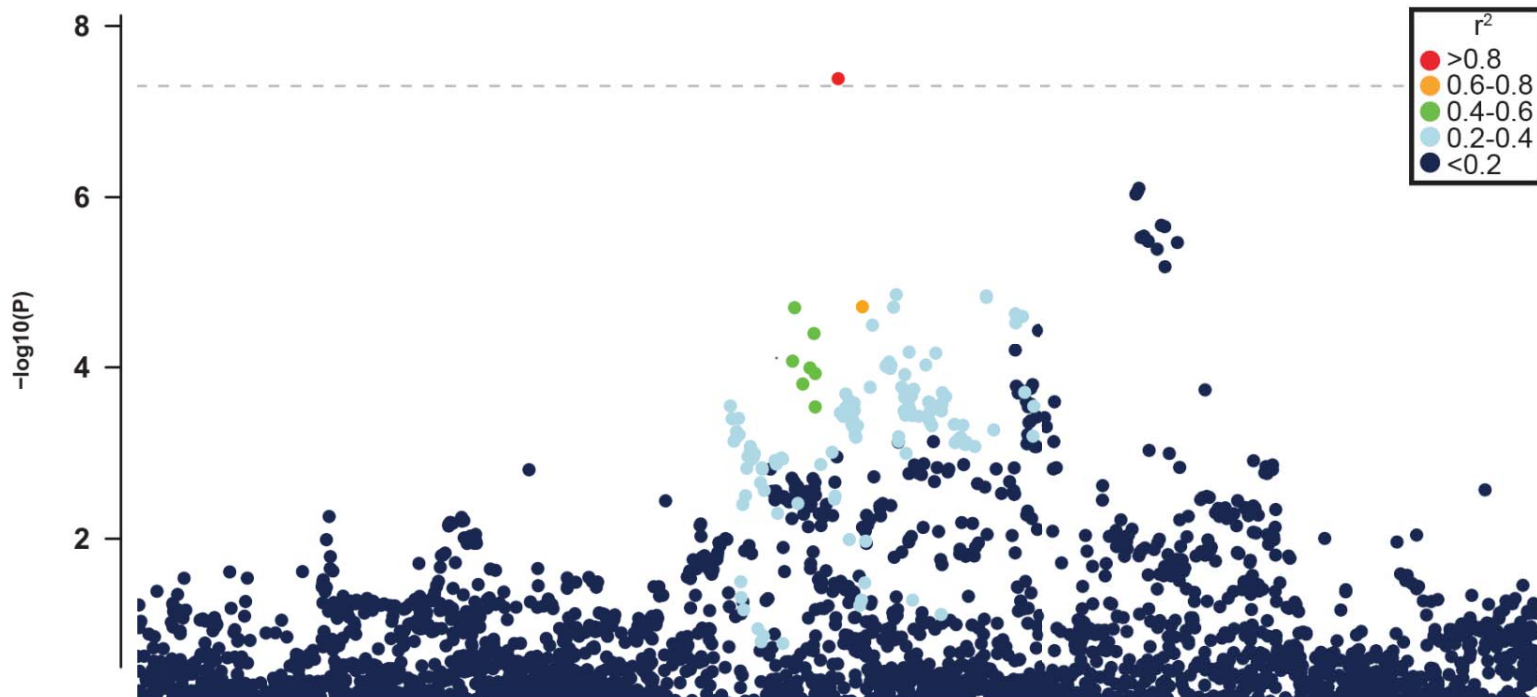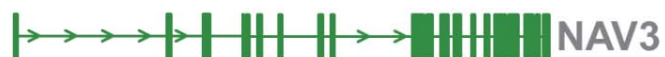

GZ>CP

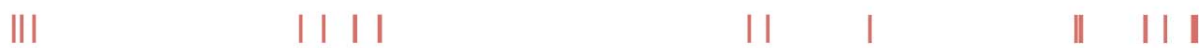

CP>GZ

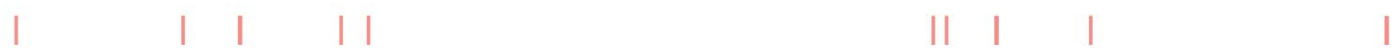

Corrected for total SA

Uncorrected

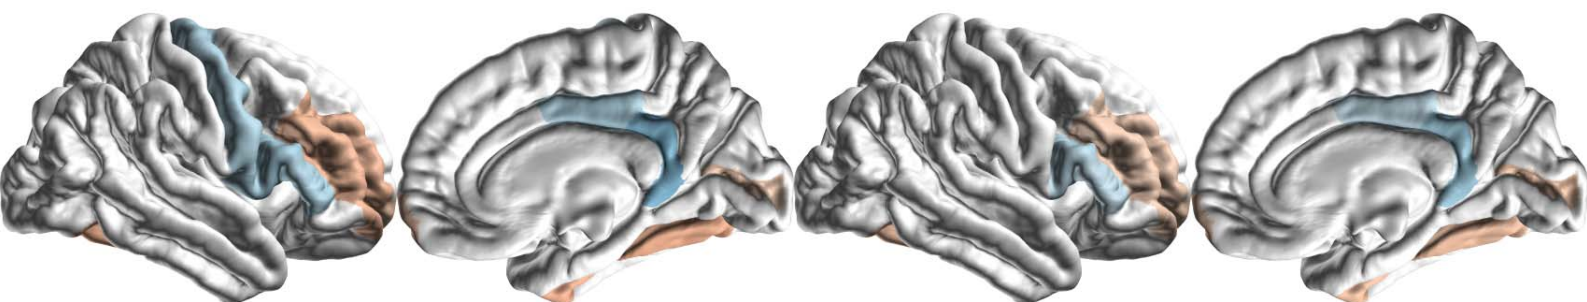

Zscore of the effect allele: A





# Isthmus Cingulate TH: rs2559509

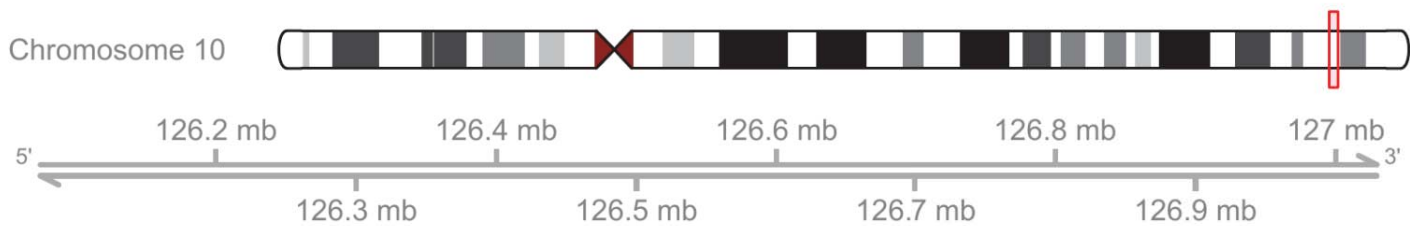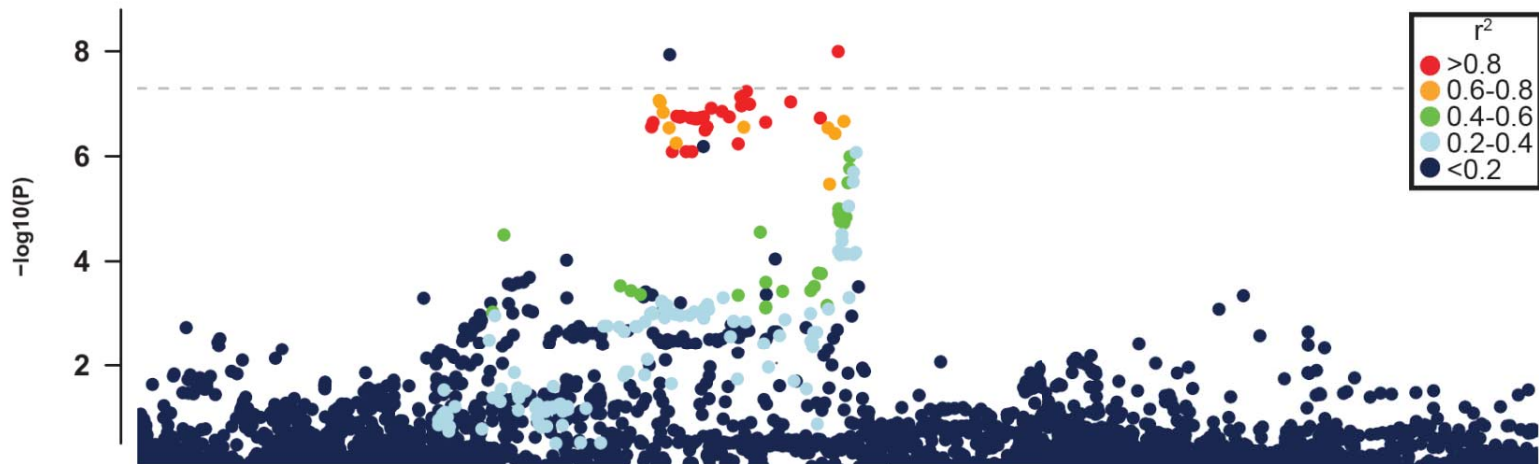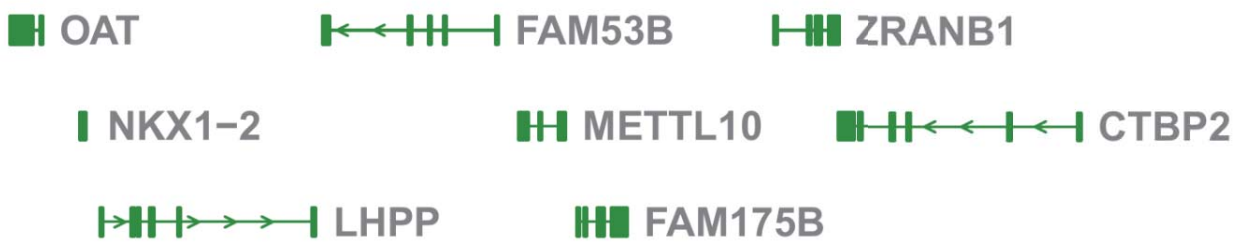

Angular Temporal dIPFC Cingulate

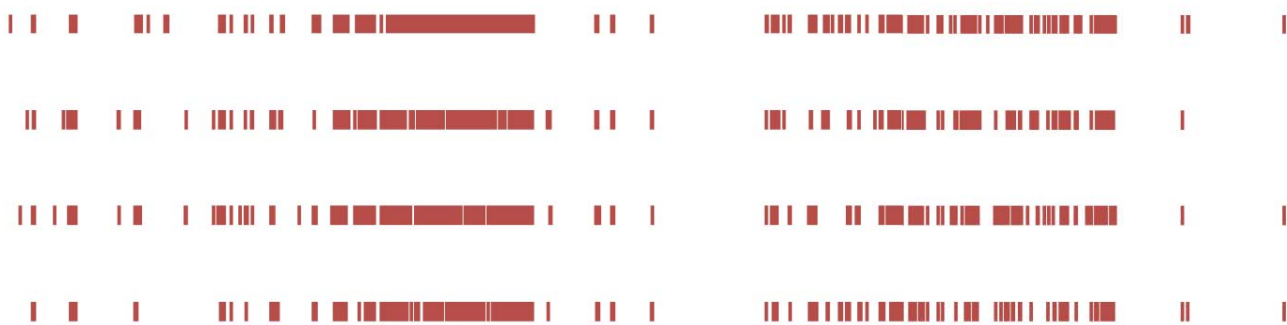

Corrected for average TH

Uncorrected

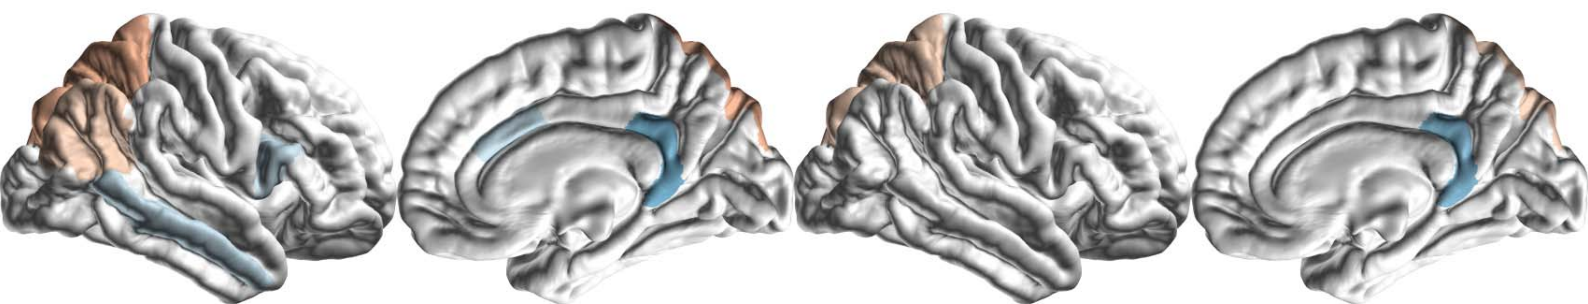

Zscore of the effect allele: A



# Insula SA: rs7728751

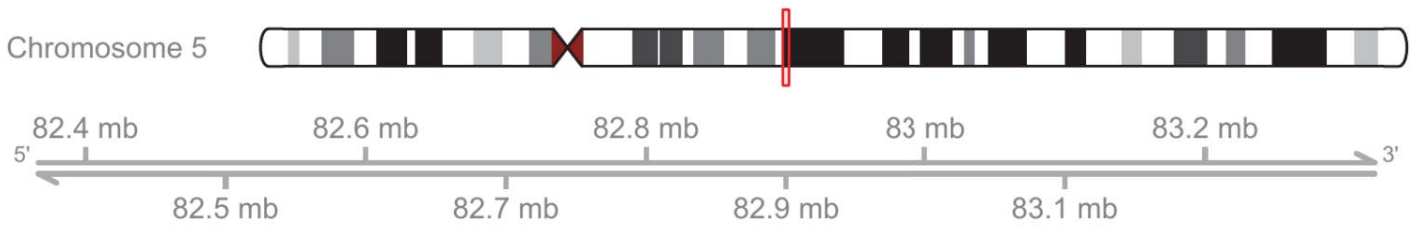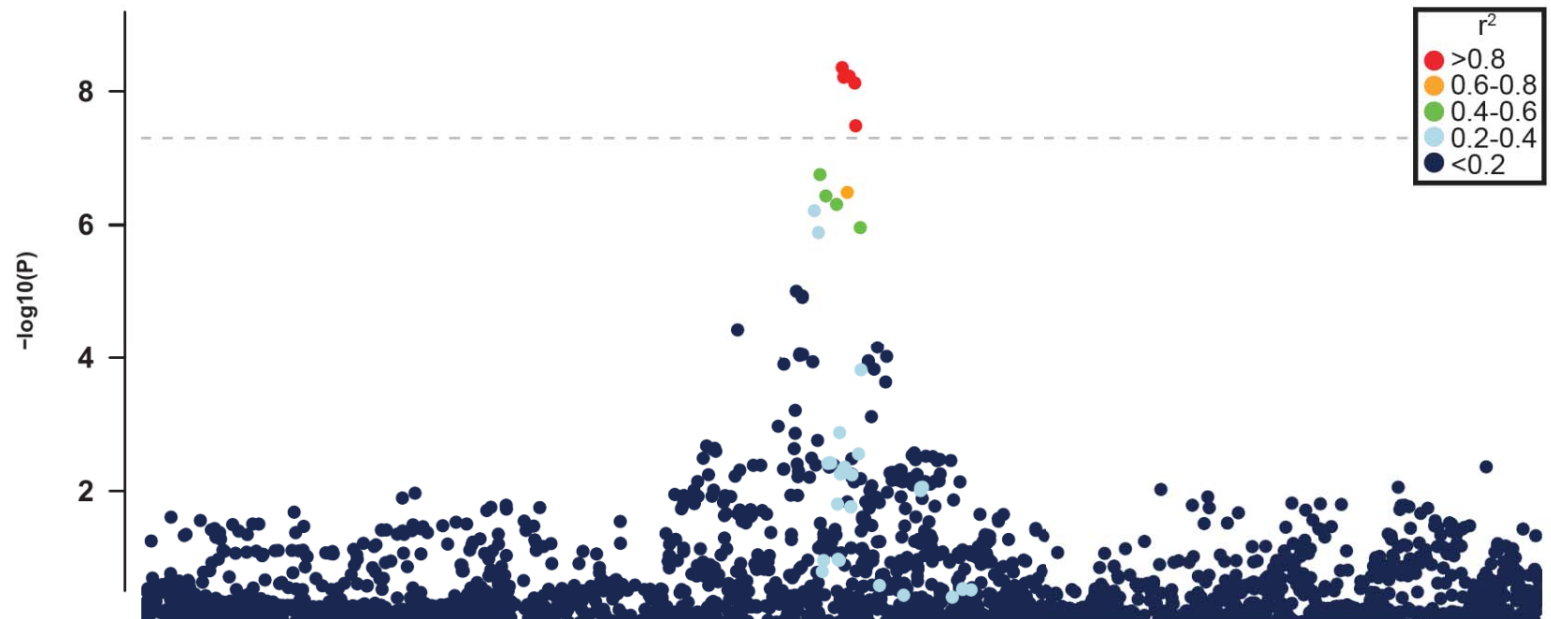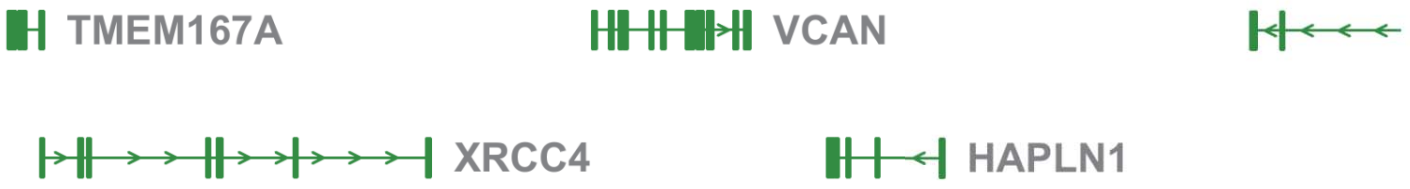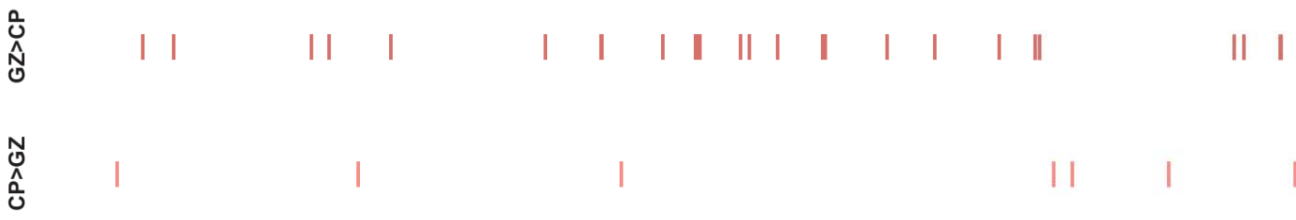

Corrected for total SA

Uncorrected

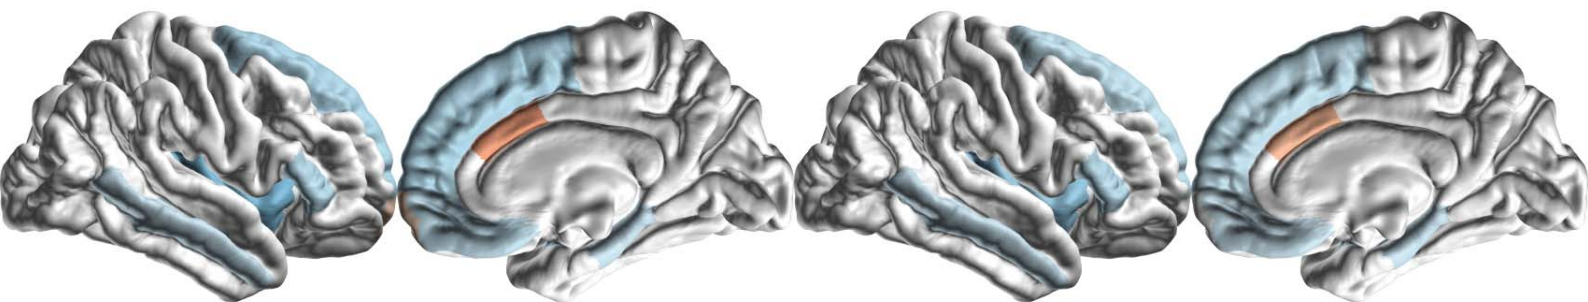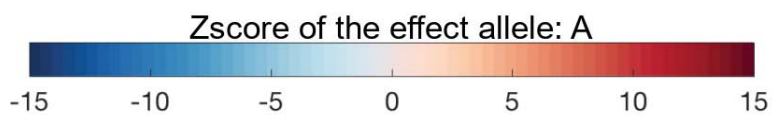

# Insula SA: rs1122688

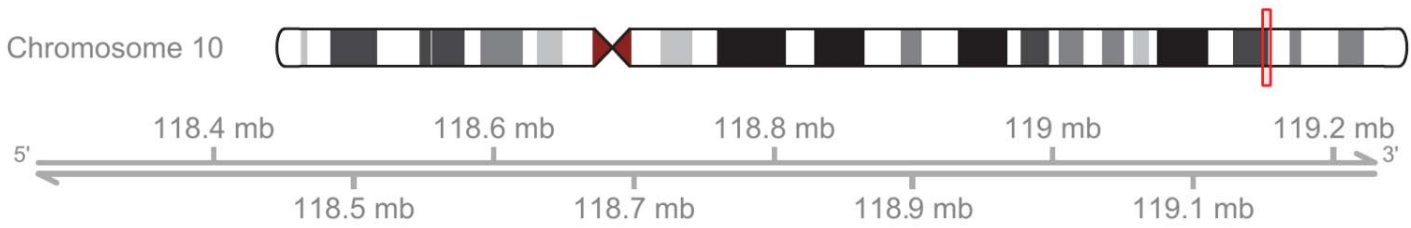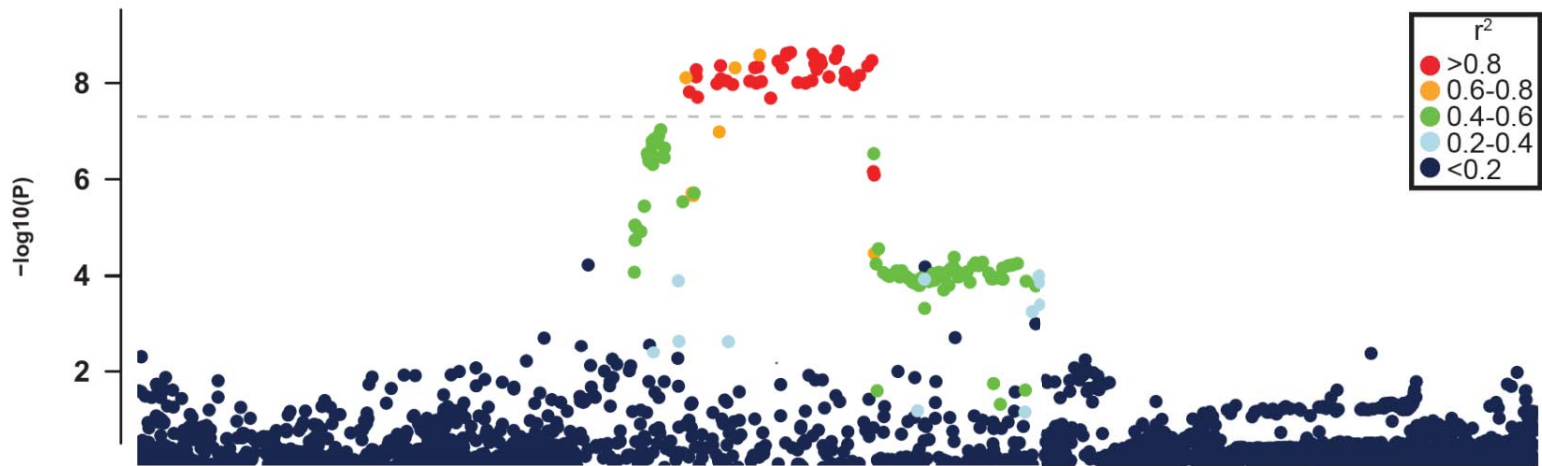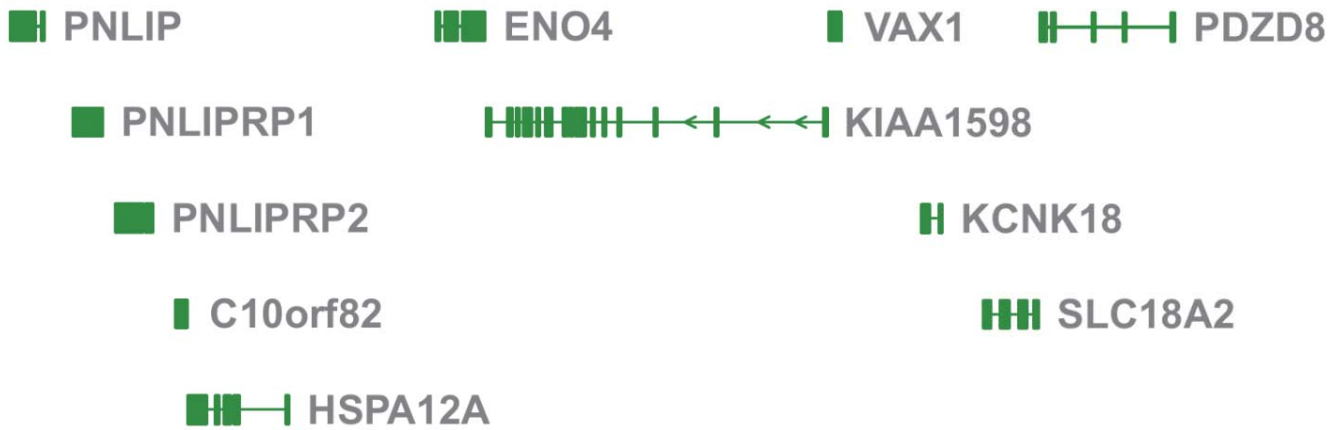

CP>GZ GZ>CP

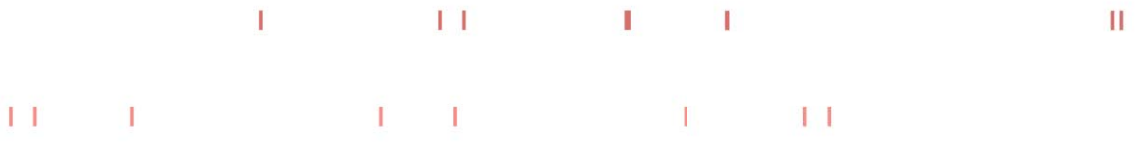

Corrected for total SA

Uncorrected

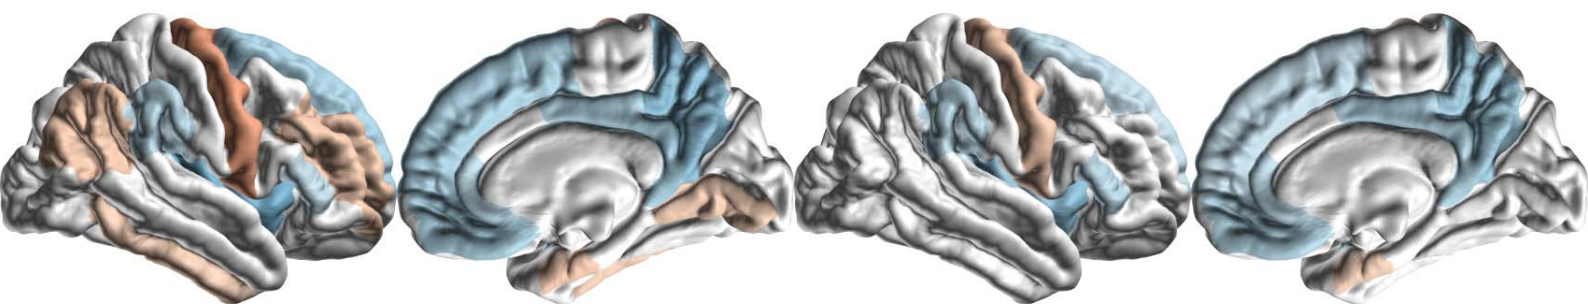

Zscore of the effect allele: T





# Insula SA: rs58066679

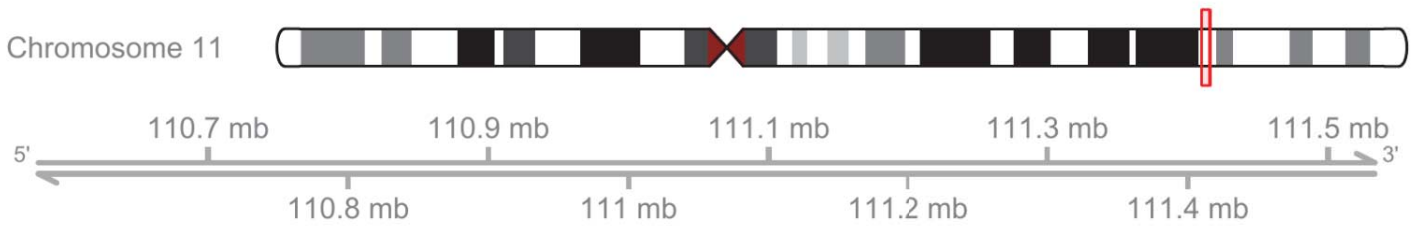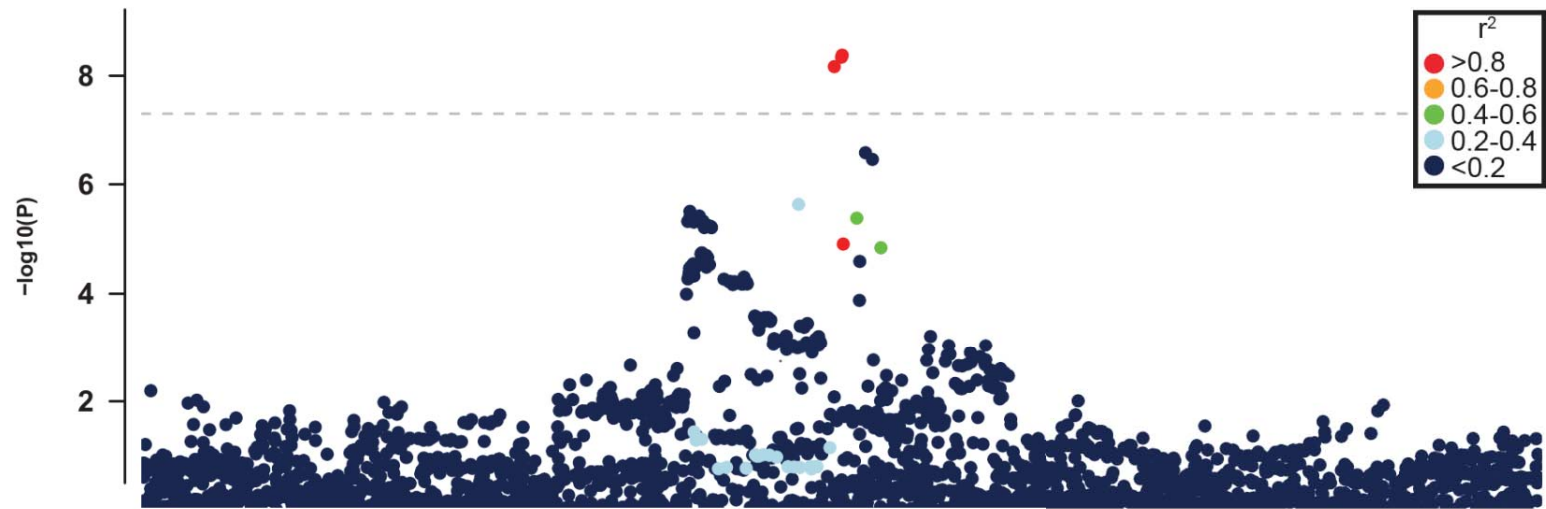

ARHGAP20

C11orf53

C11orf88

COLCA2

LAYN

POU2AF1

→

← BTG4

CP>GZ

GZ>CP

Corrected for total SA

Uncorrected

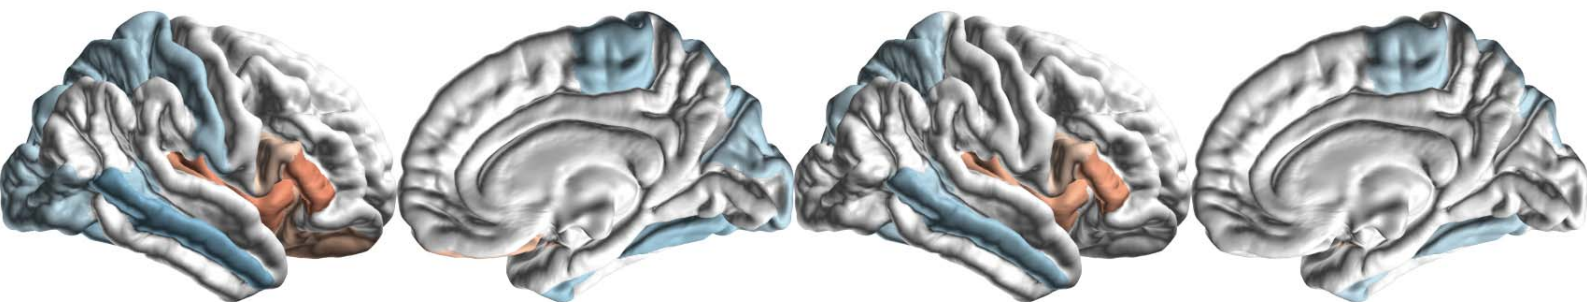

Zscore of the effect allele: A

-15 -10 -5 0 5 10 15

# Insula SA: rs6505147

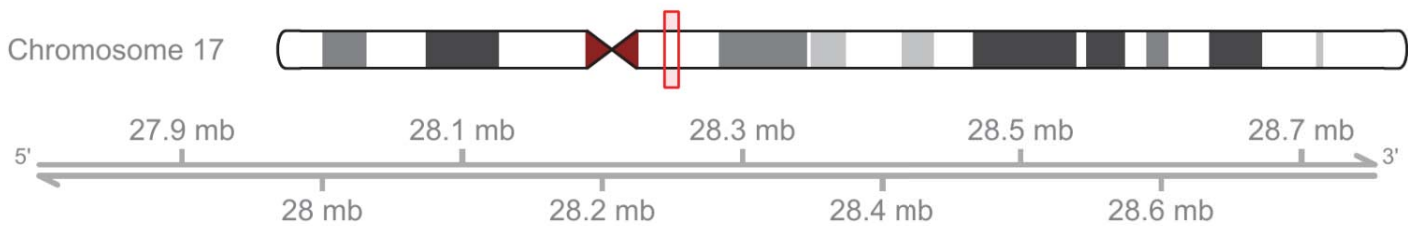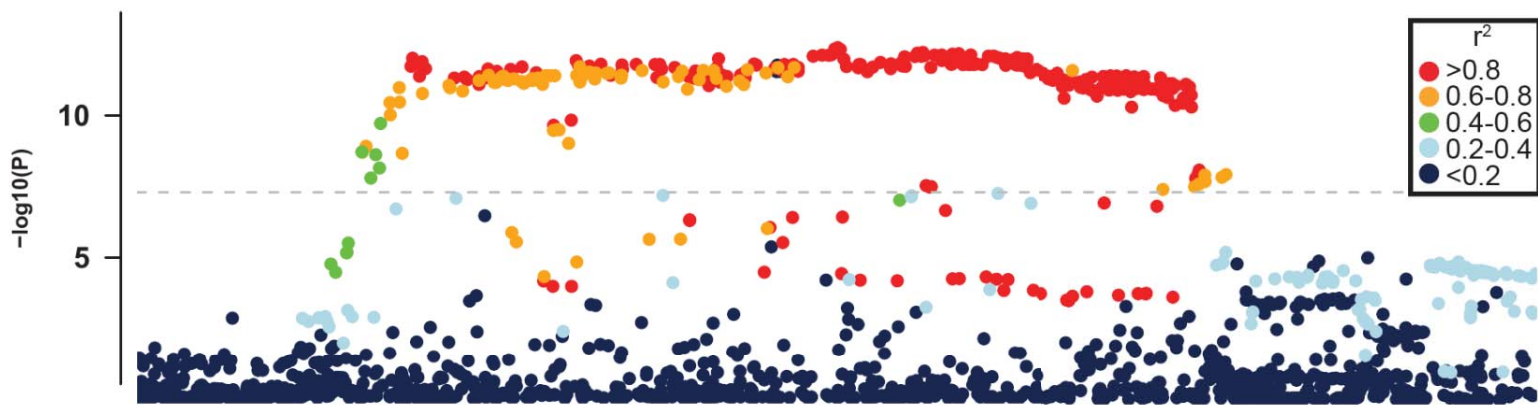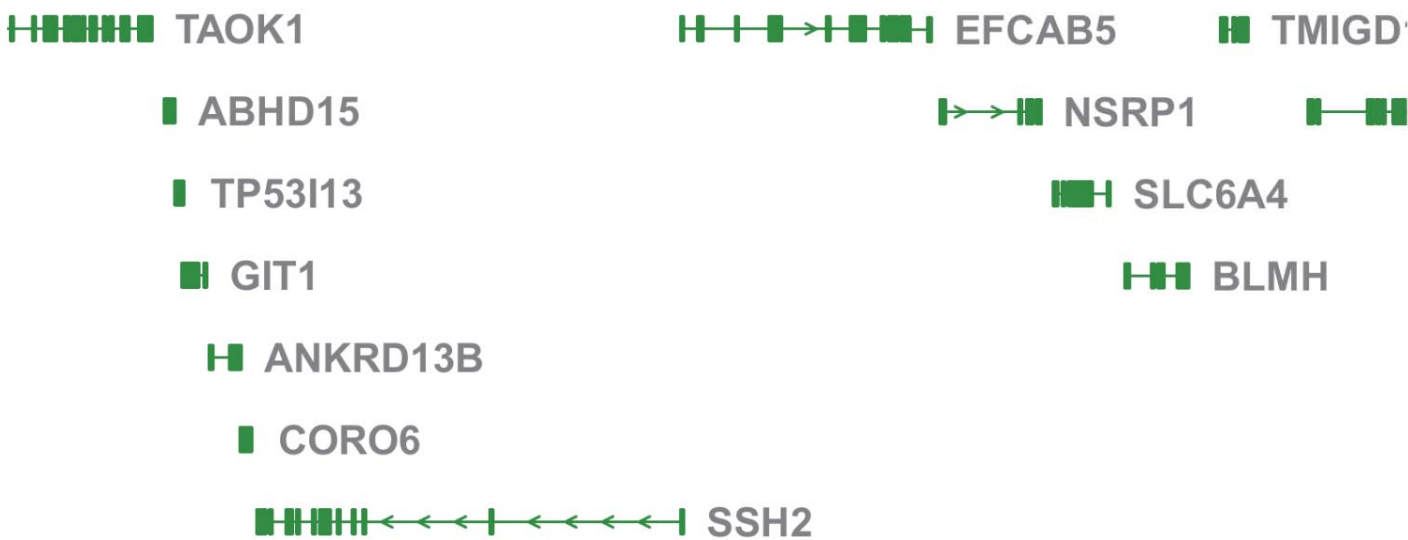

CP>GZ GZ>CP

Corrected for total SA

Uncorrected

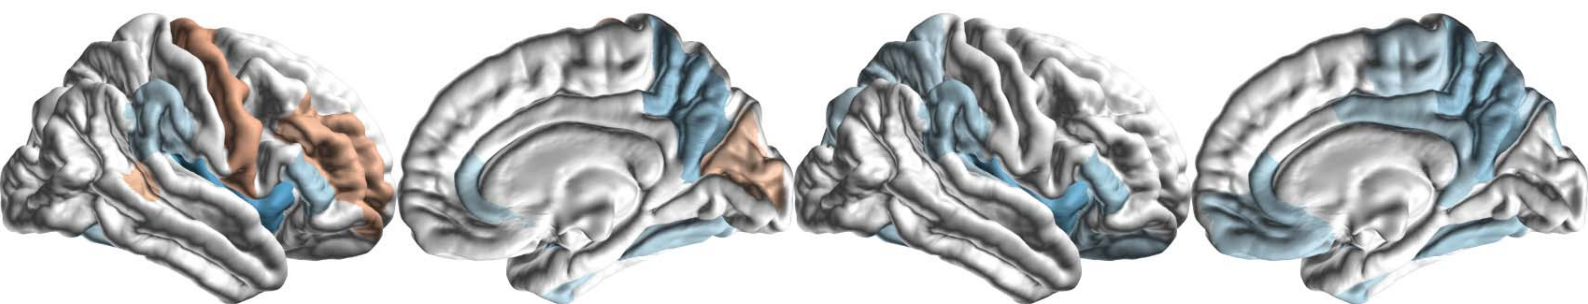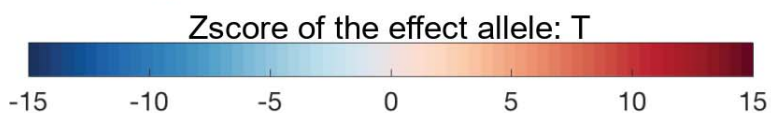

# Entorhinal SA: rs6693283

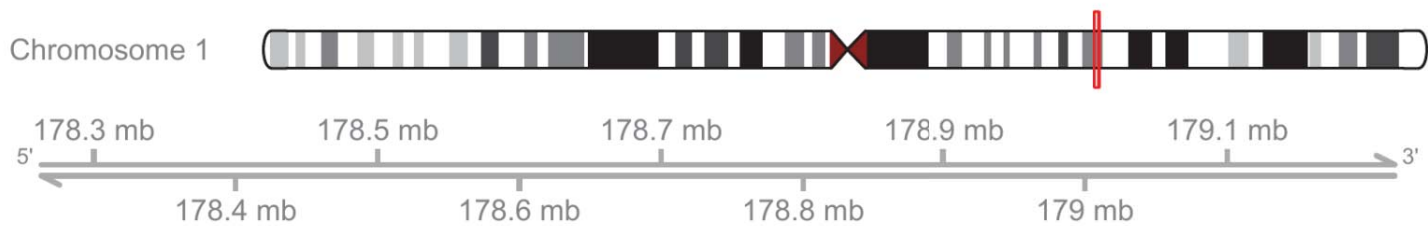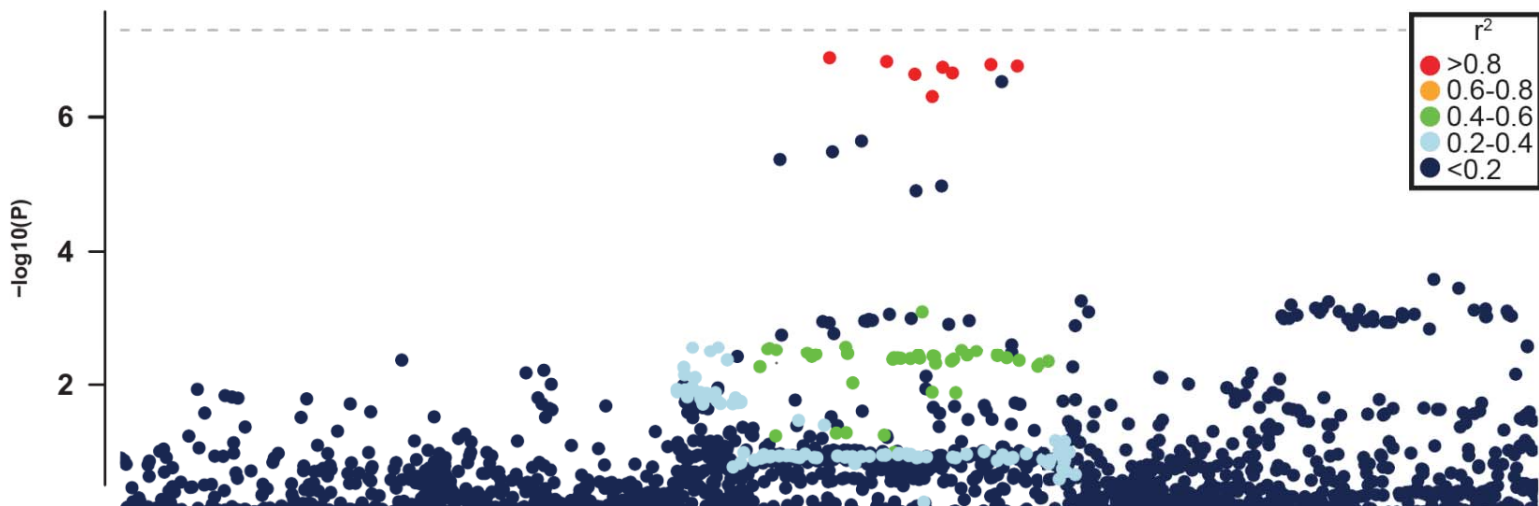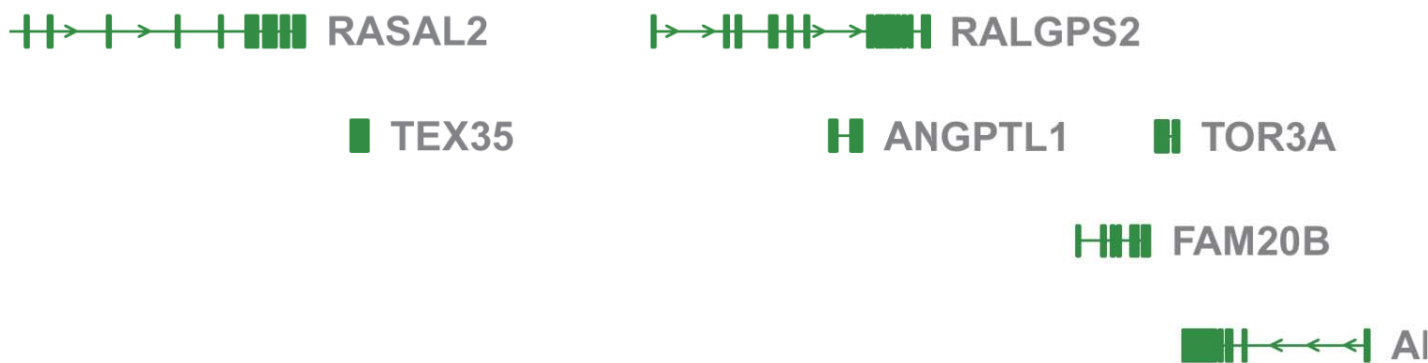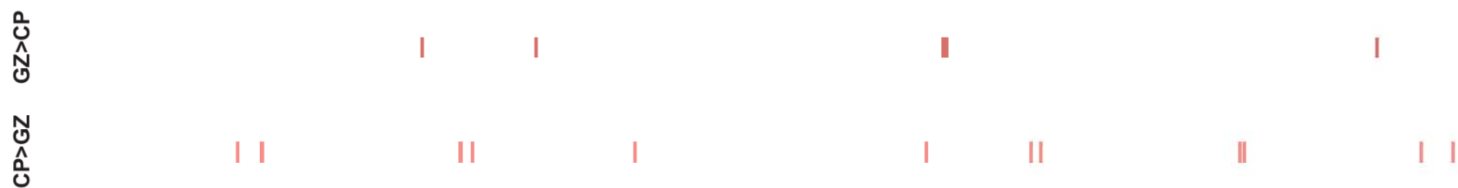

Corrected for total SA

Uncorrected

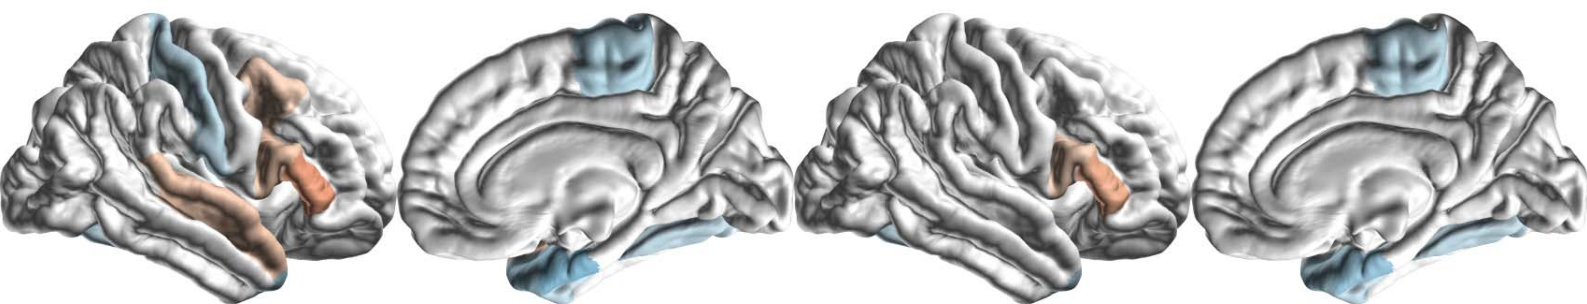

Zscore of the effect allele: A





# Entorhinal SA: rs4147321

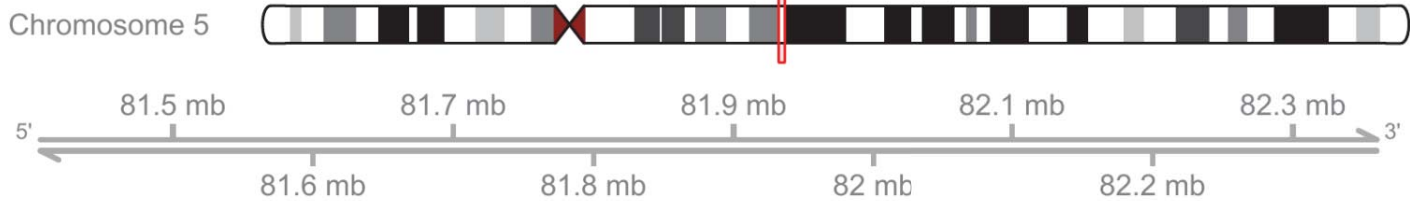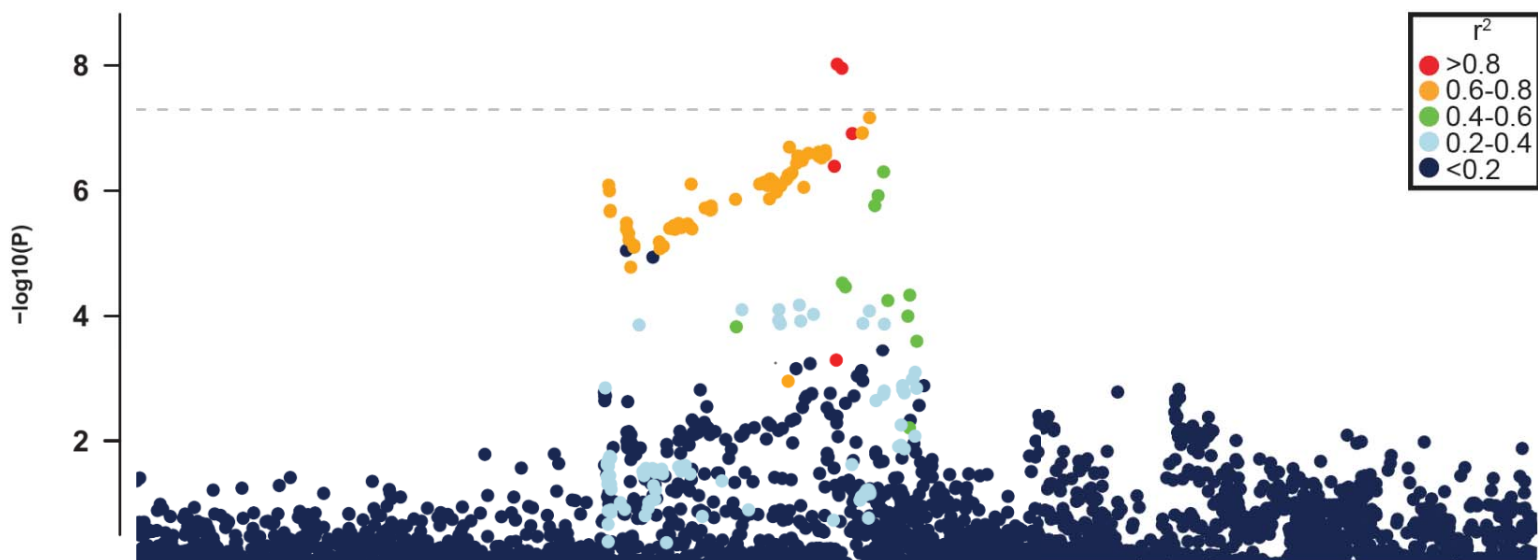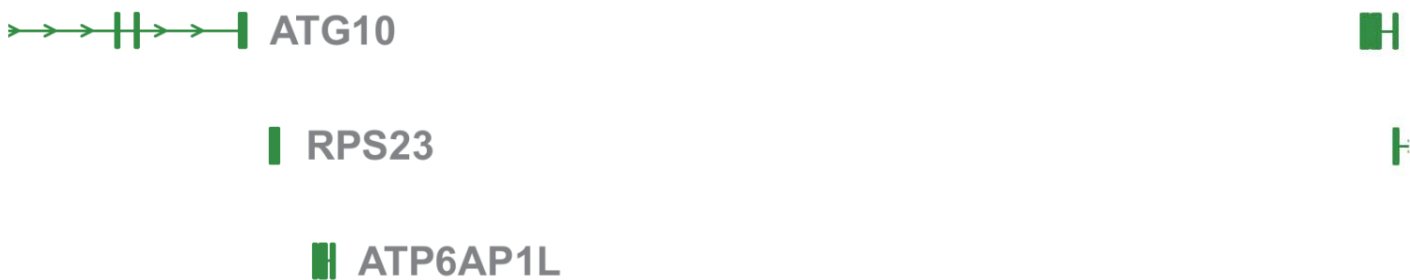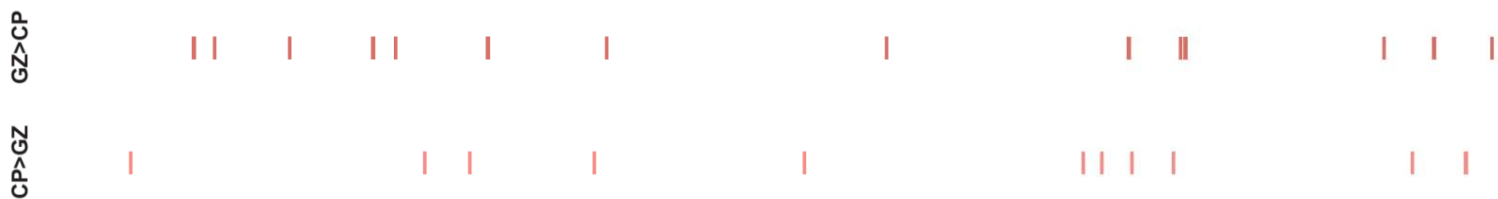

Corrected for total SA

Uncorrected

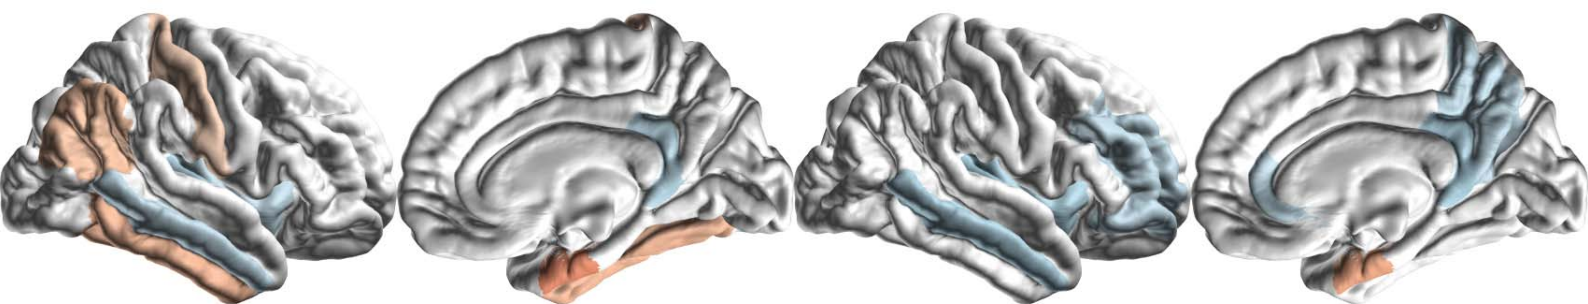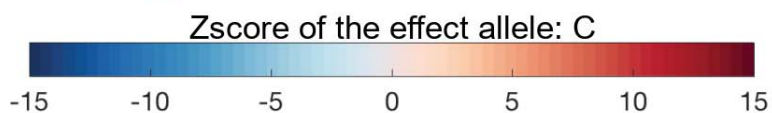

# Entorhinal SA: rs7141150

Chromosome 14

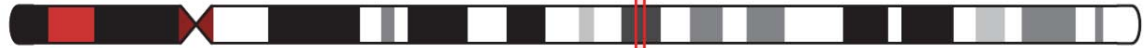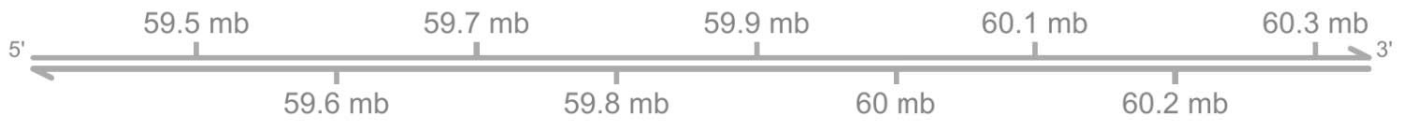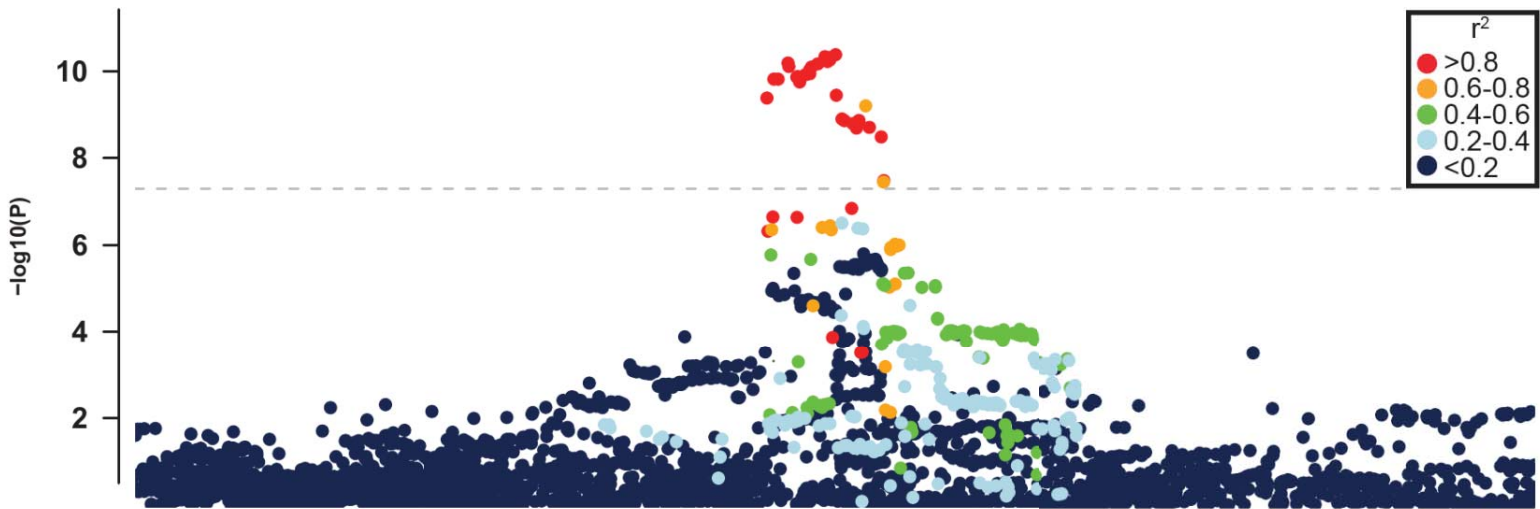

DAAM1 CCDC175

GPR135 F

L3HYPDH

JKAMP

CP>GZ GZ>CP

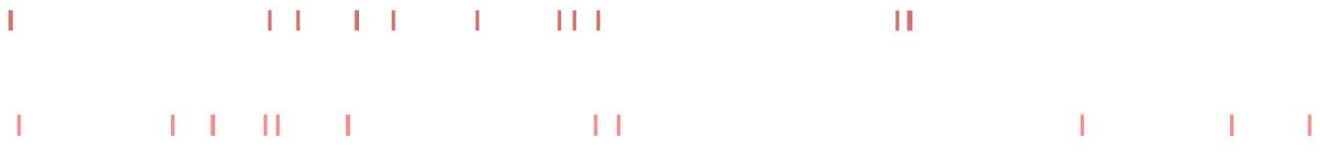

Corrected for total SA

Uncorrected

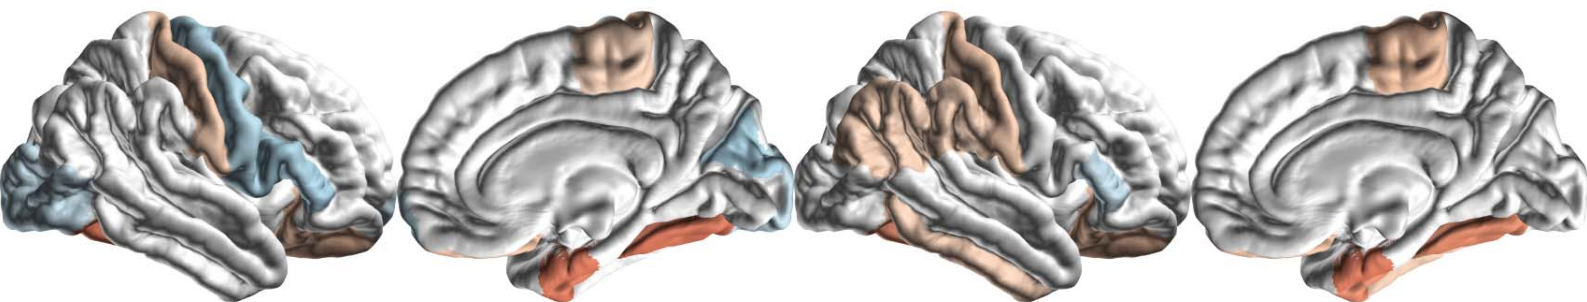

Zscore of the effect allele: A

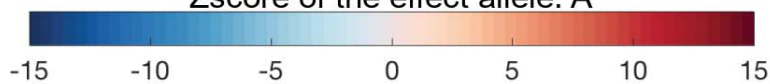

# Entorhinal TH: rs2885259

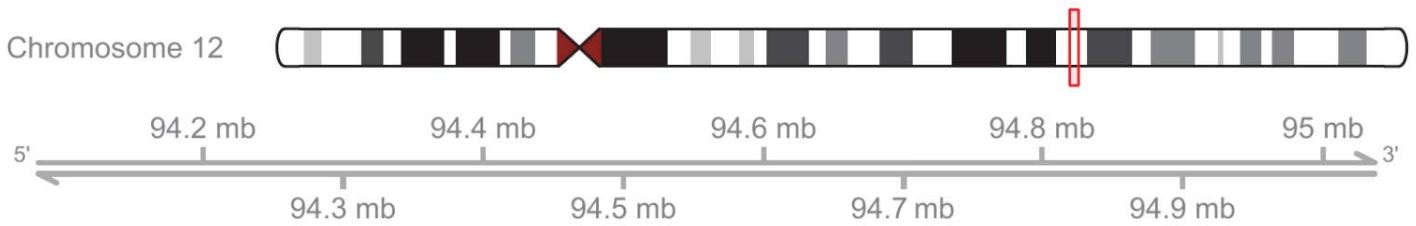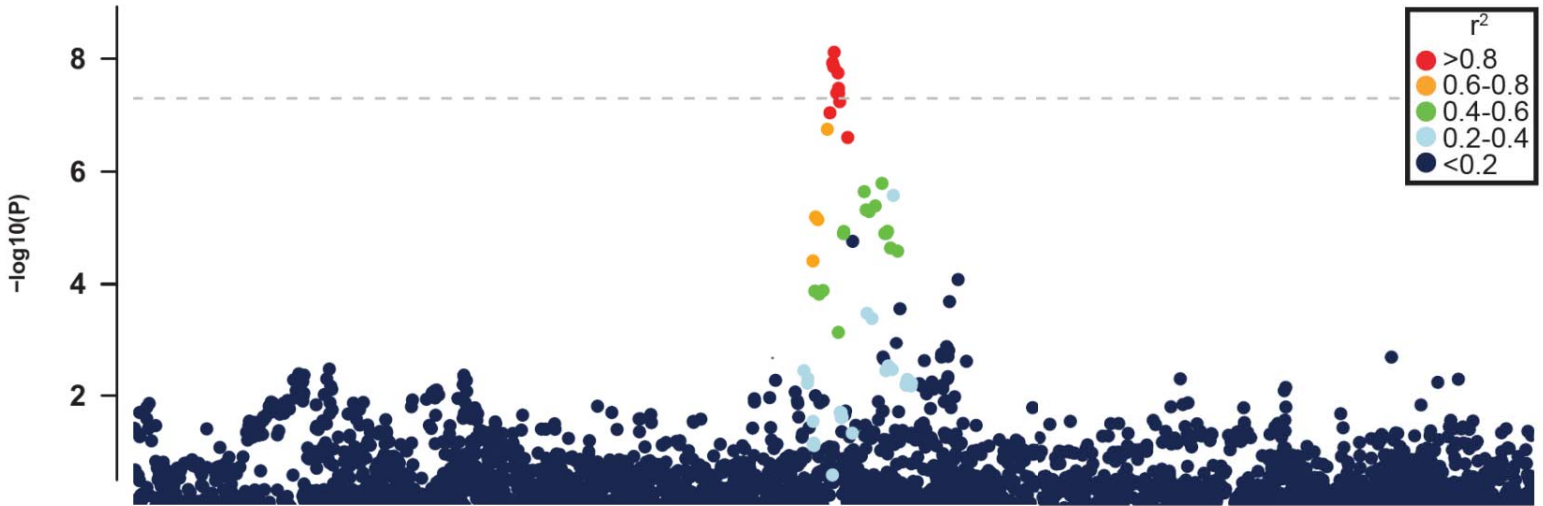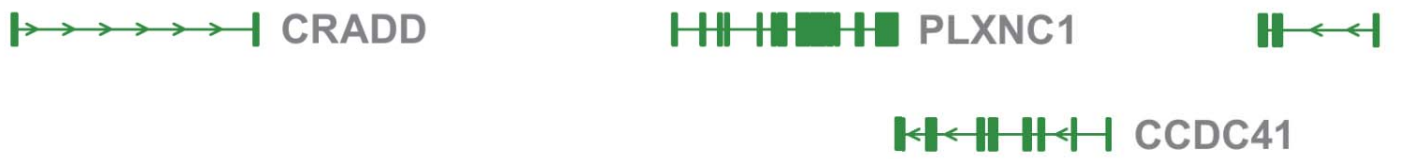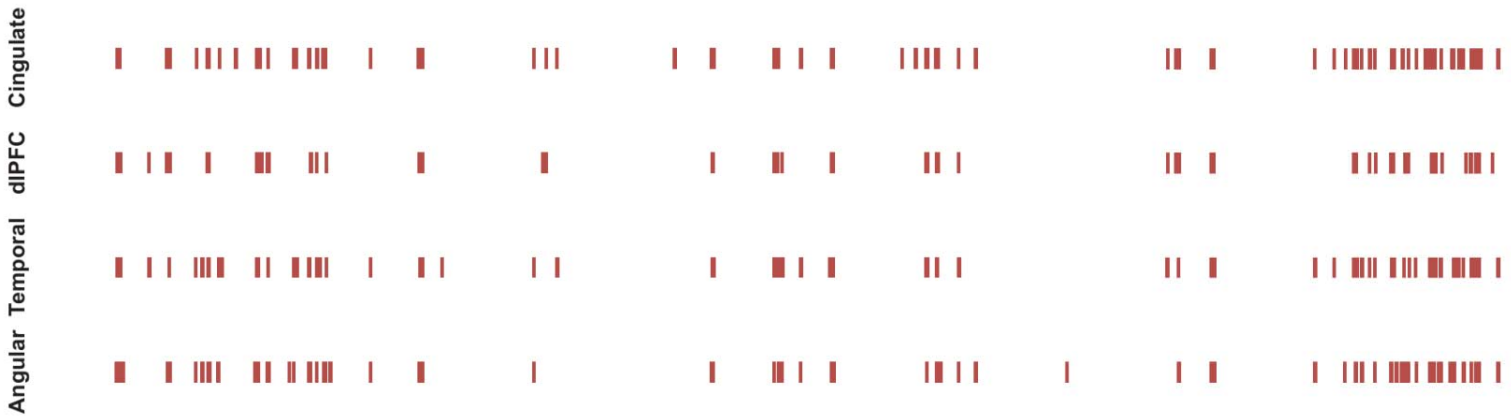

Corrected for average TH

Uncorrected

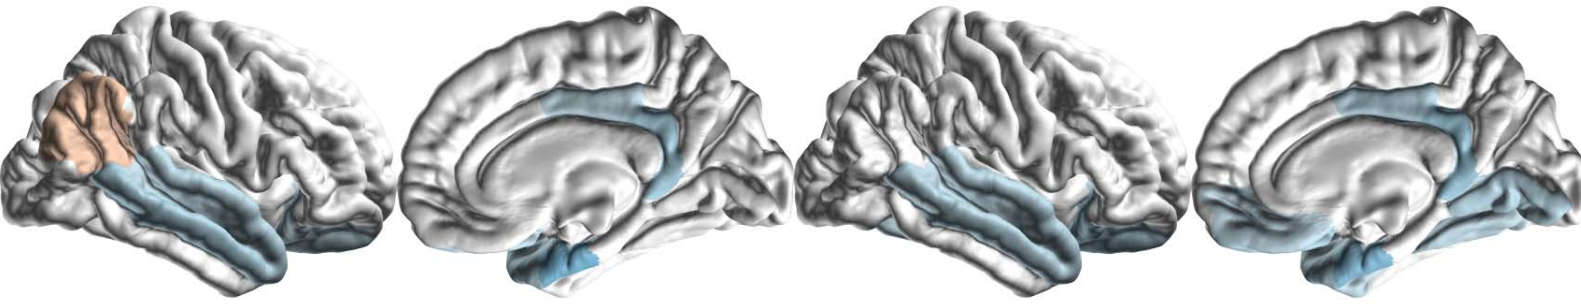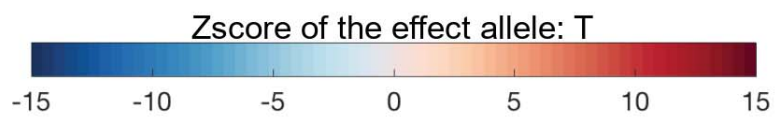



# Parahippocampal SA: rs27493

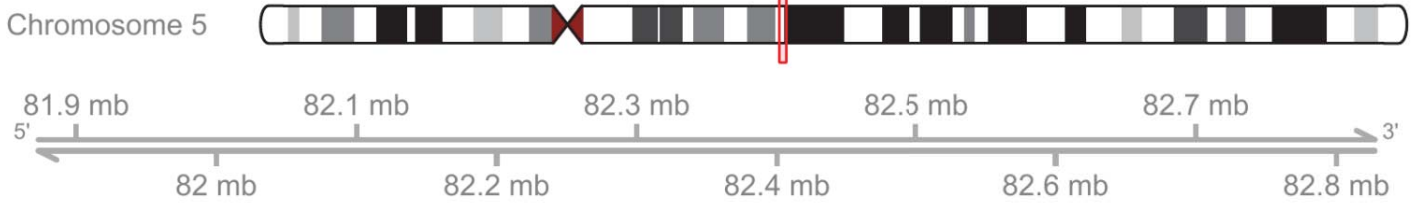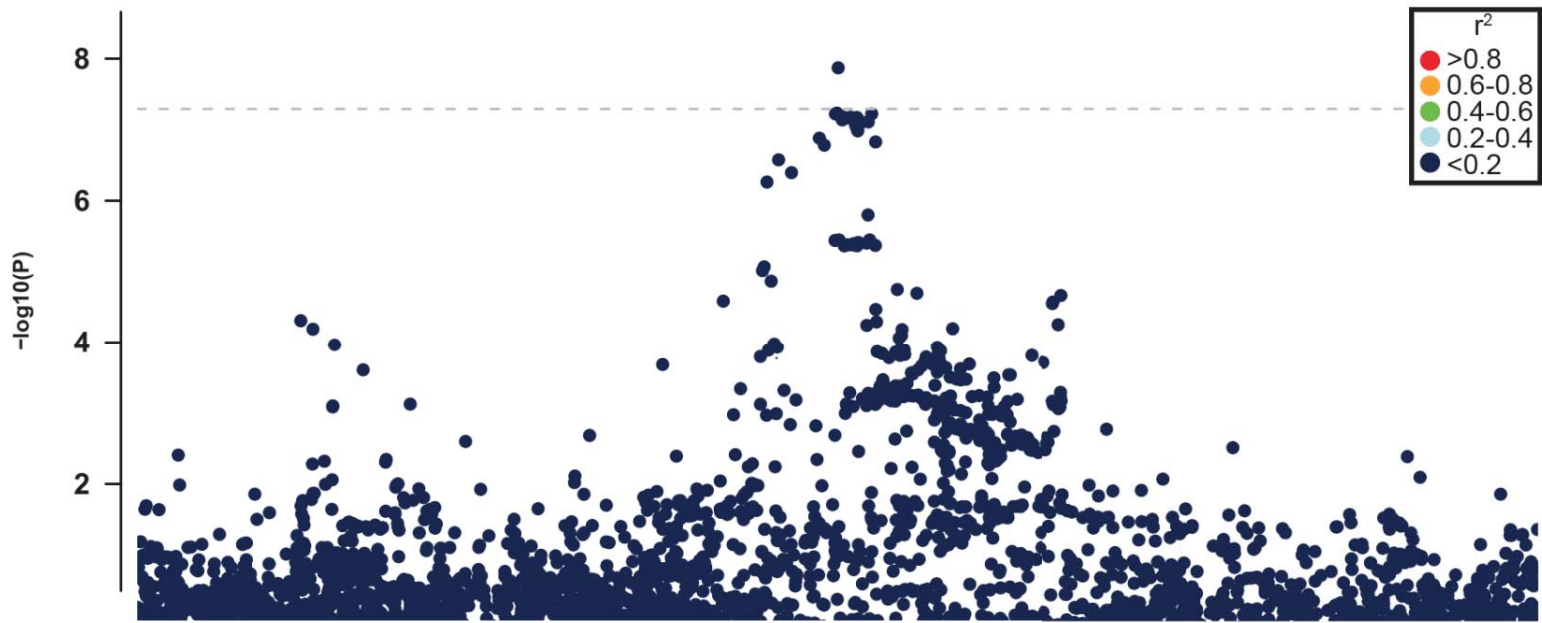

TMEM167A

XRCC4

GZ>CP

CP>GZ

Corrected for total SA

Uncorrected

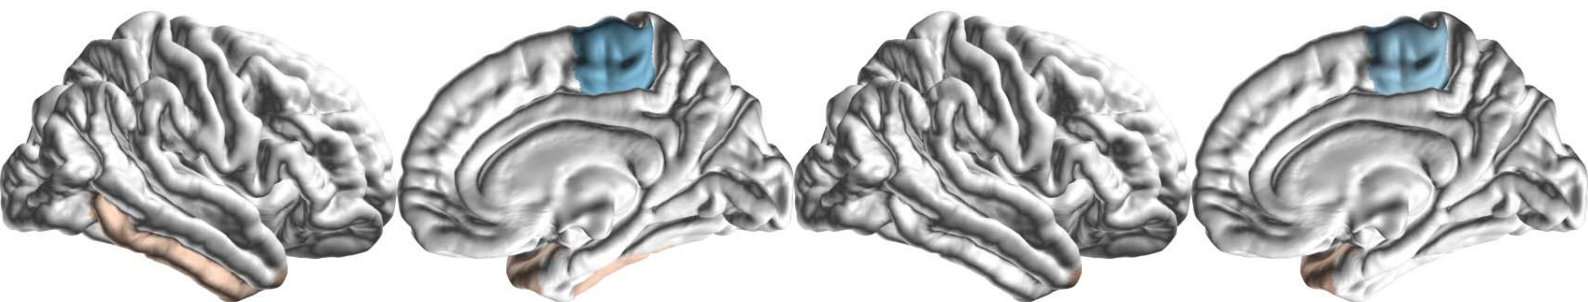

Zscore of the effect allele: A



# Parahippocampal SA: rs4273712

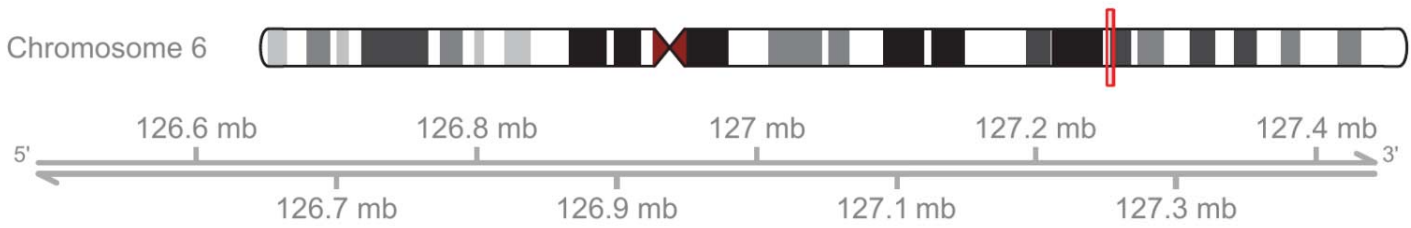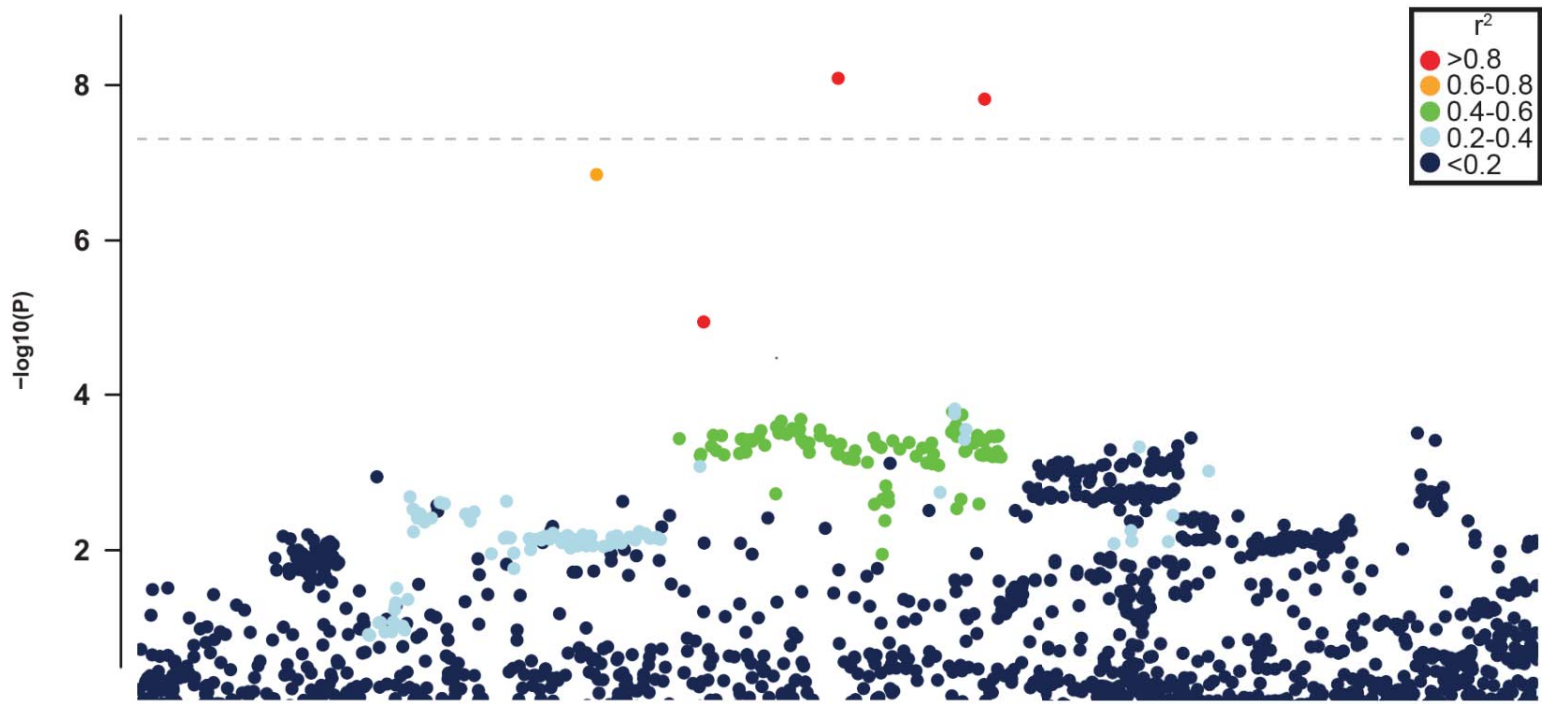

CENPW

GZ>CP

CP>GZ

Corrected for total SA

Uncorrected

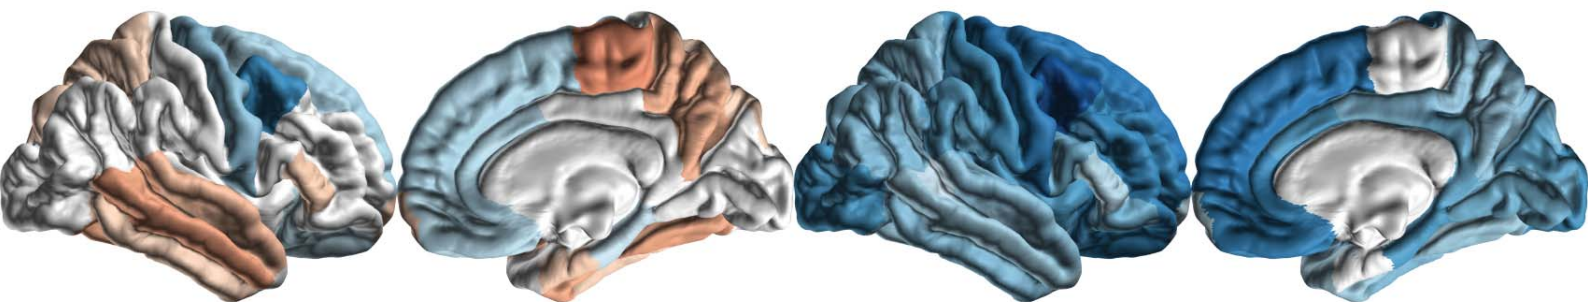

-15 -10 -5 0 5 10 15

# Parahippocampal SA: rs1792354

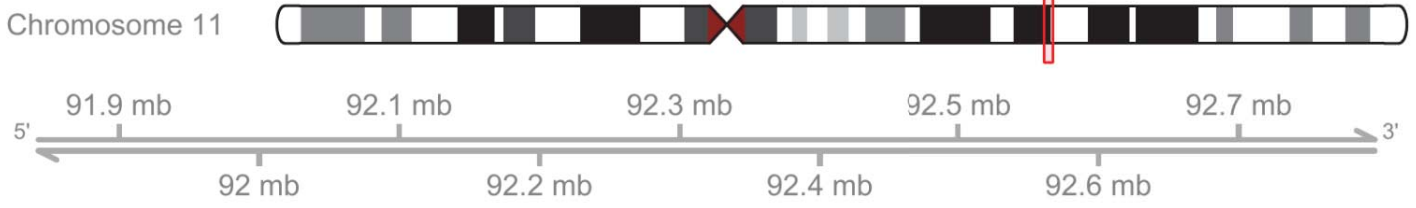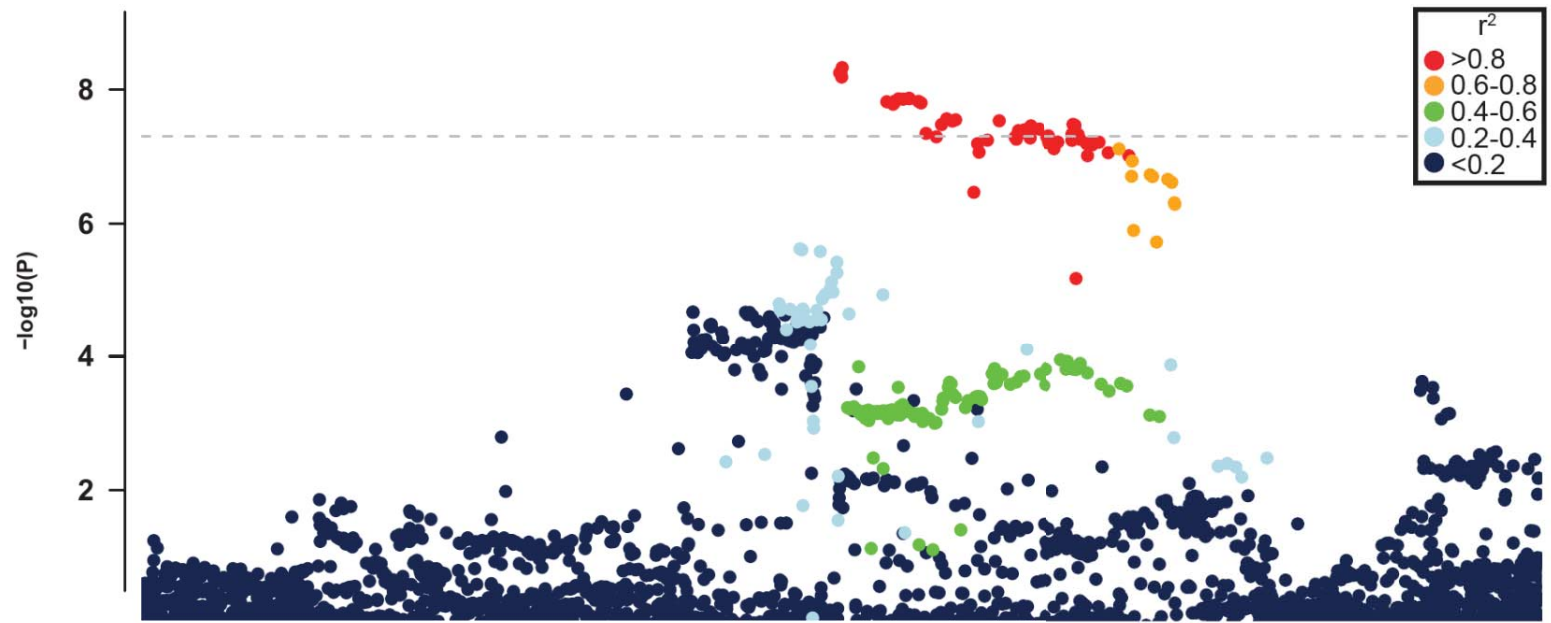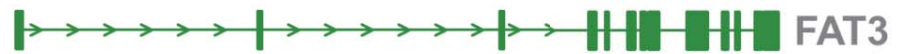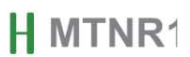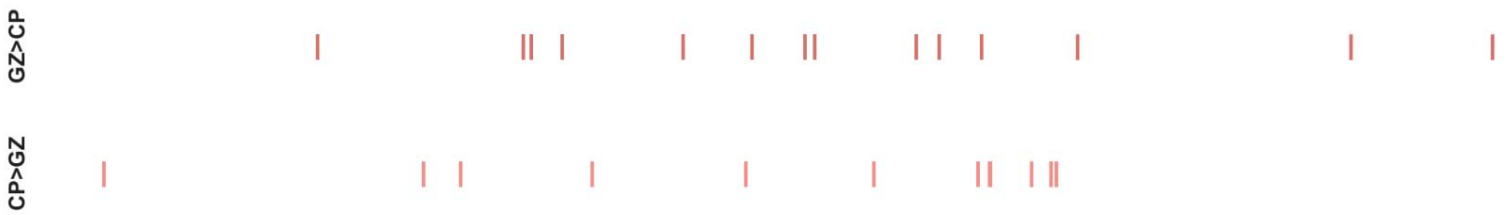

Corrected for total SA

Uncorrected

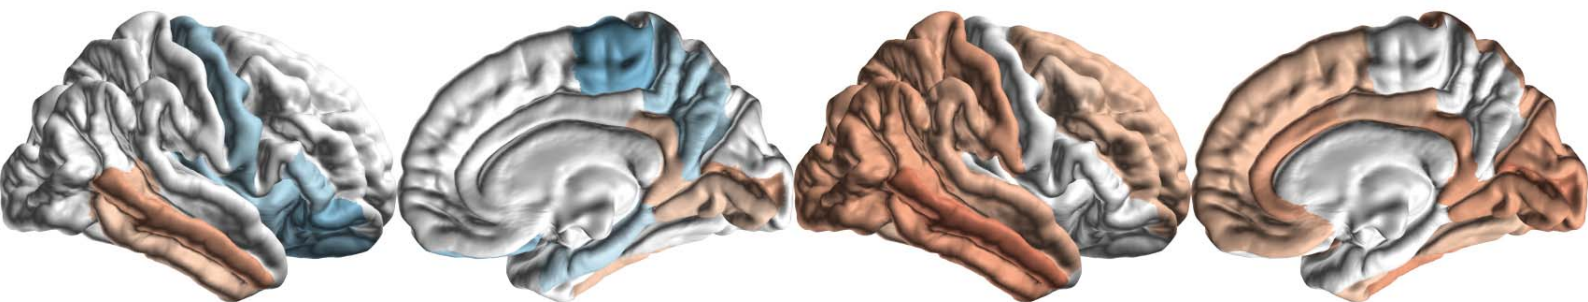

Zscore of the effect allele: T





# Parahippocampal TH: rs28591501

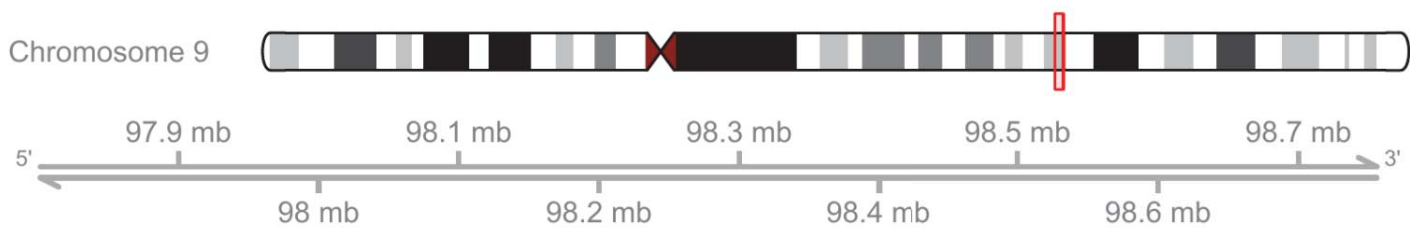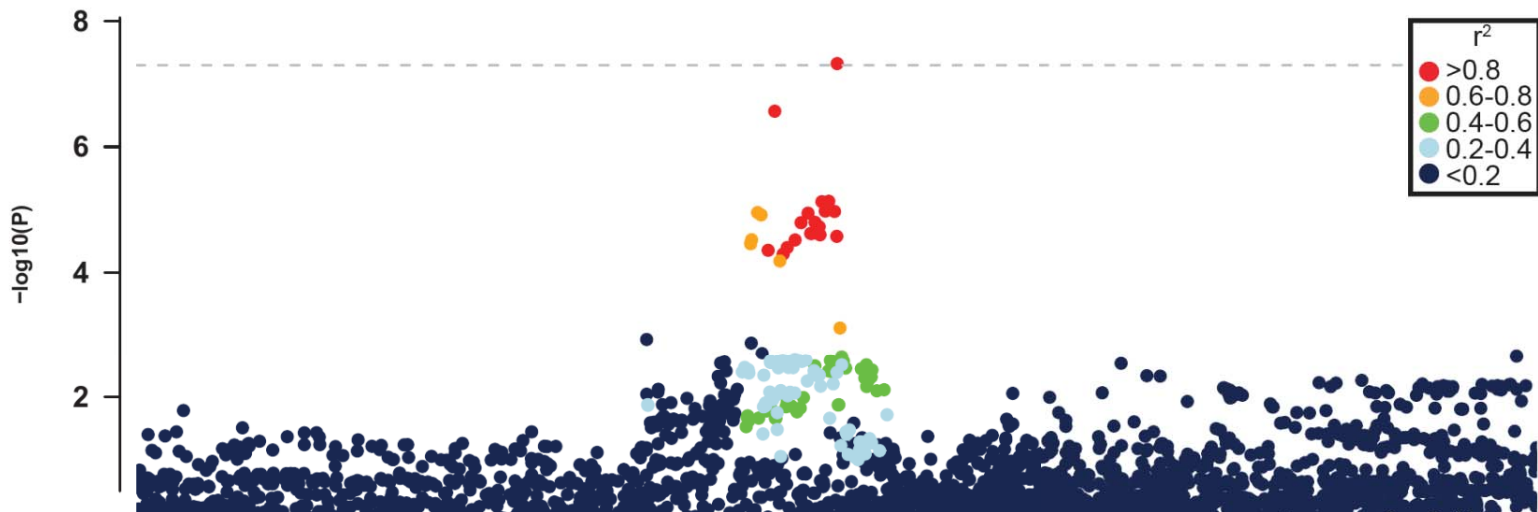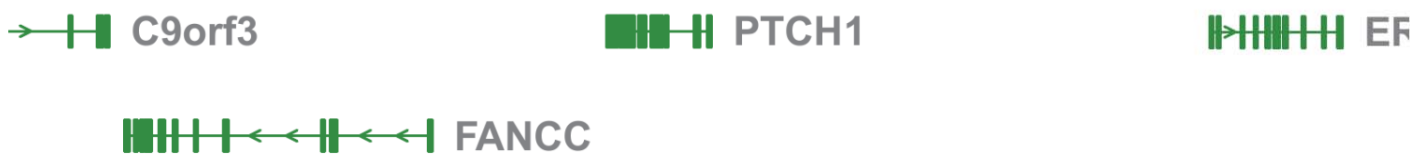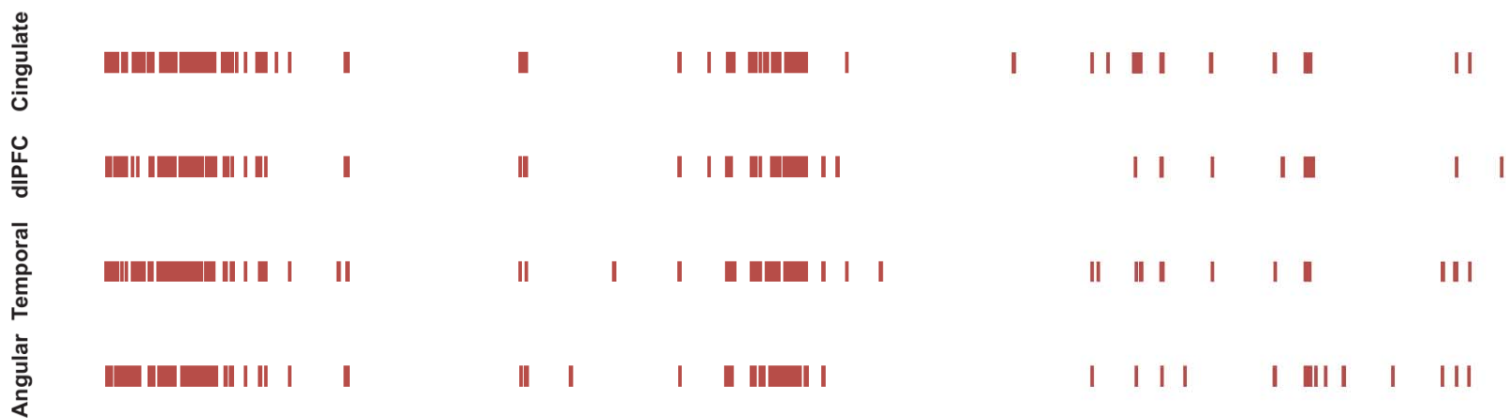

Corrected for average TH

Uncorrected

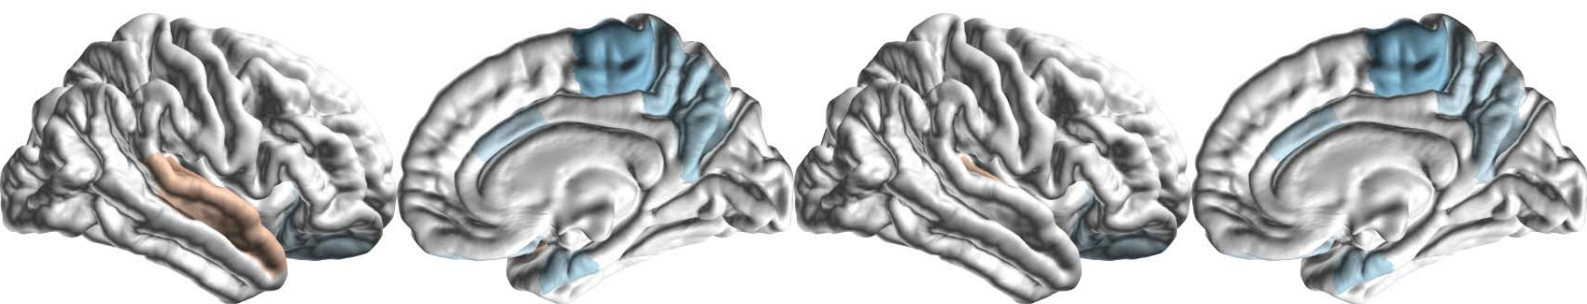

Zscore of the effect allele: A



# Fusiform SA: rs61784835

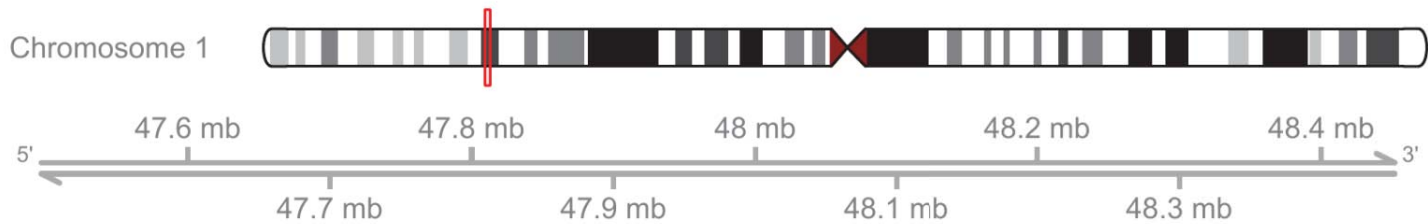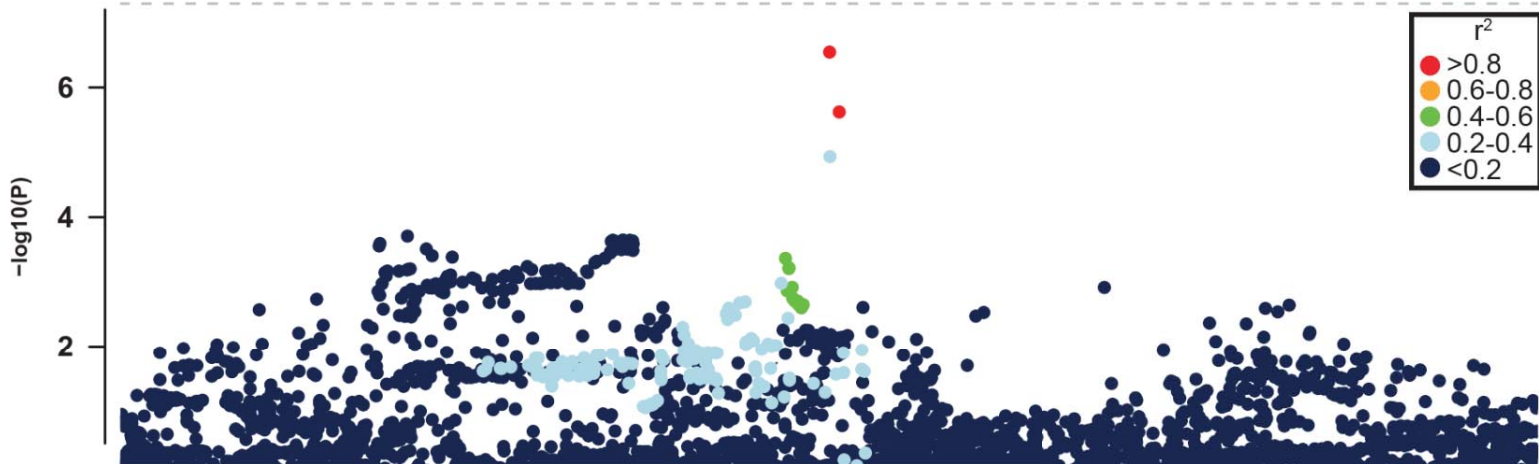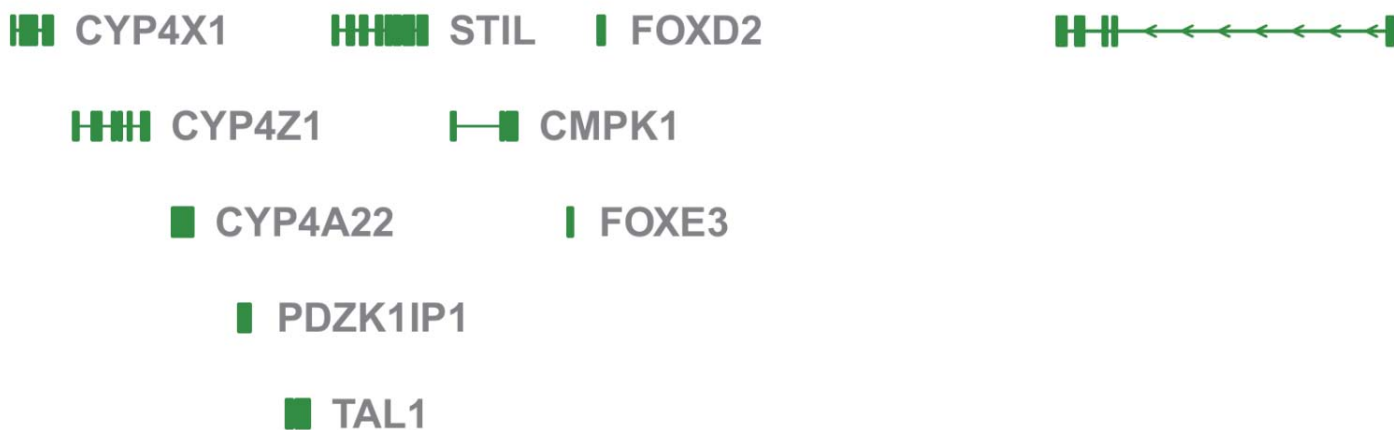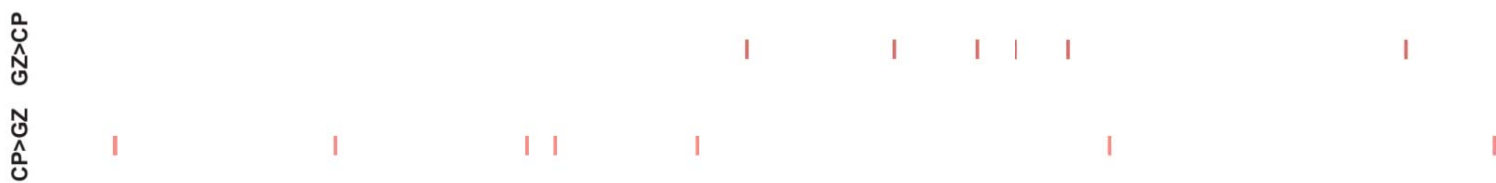

Corrected for total SA

Uncorrected

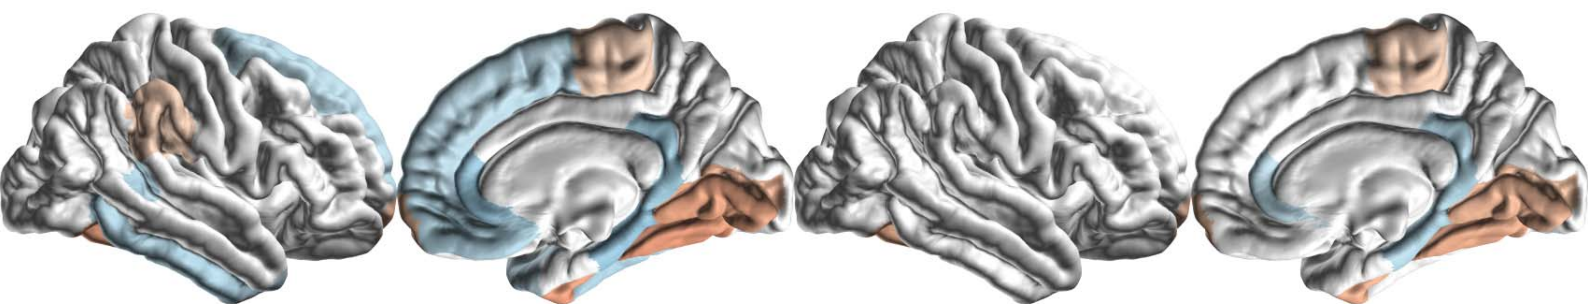

Zscore of the effect allele: T



# Fusiform SA: rs10940512

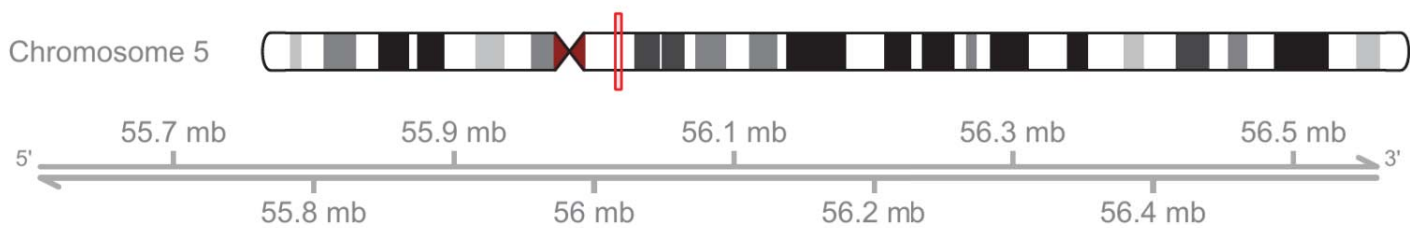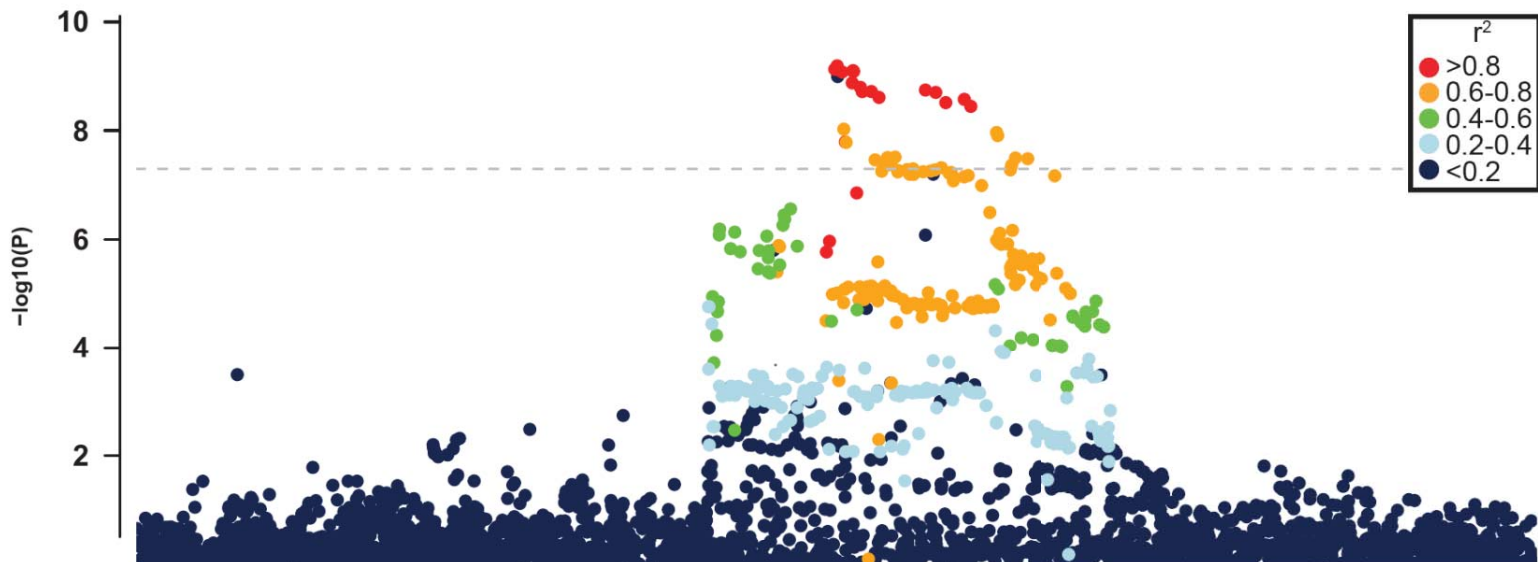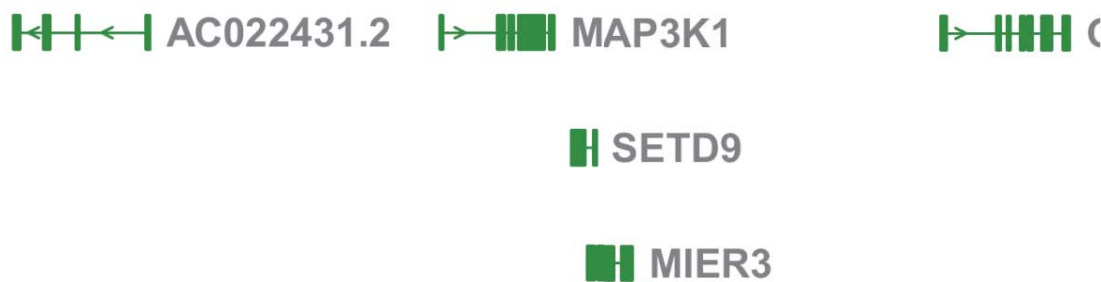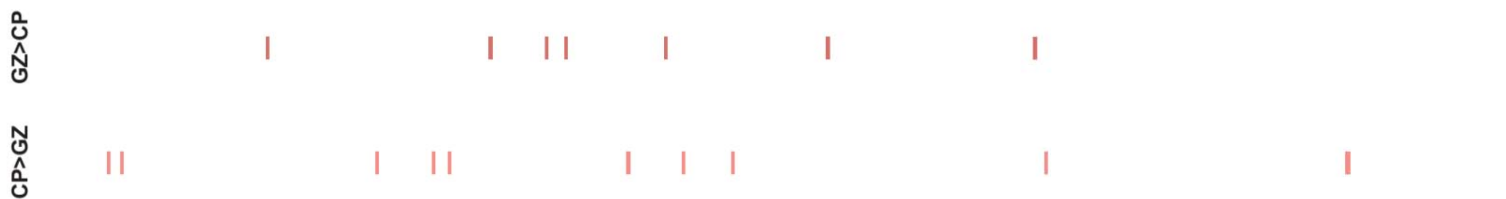

Corrected for total SA

Uncorrected

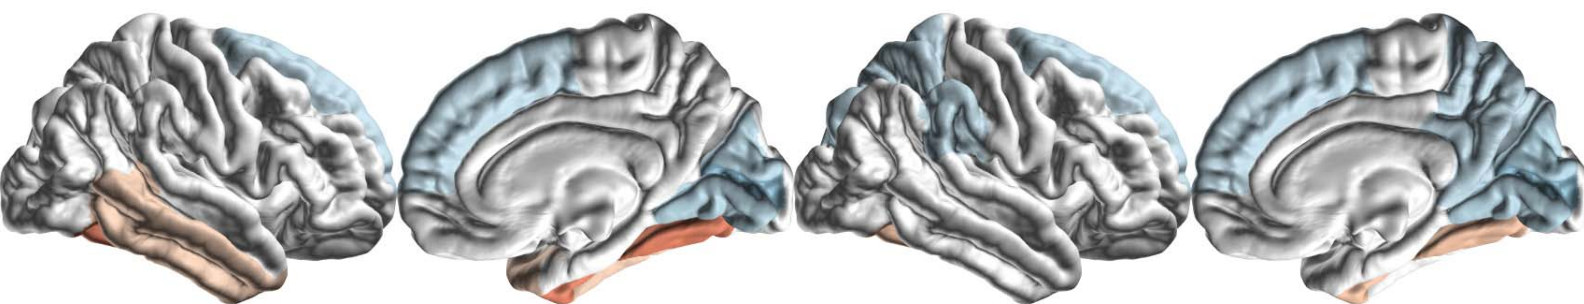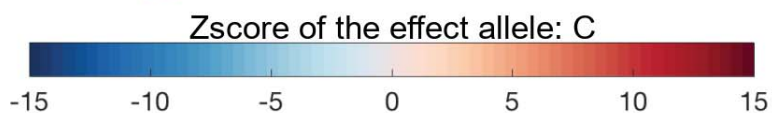



# Fusiform SA: rs7123402

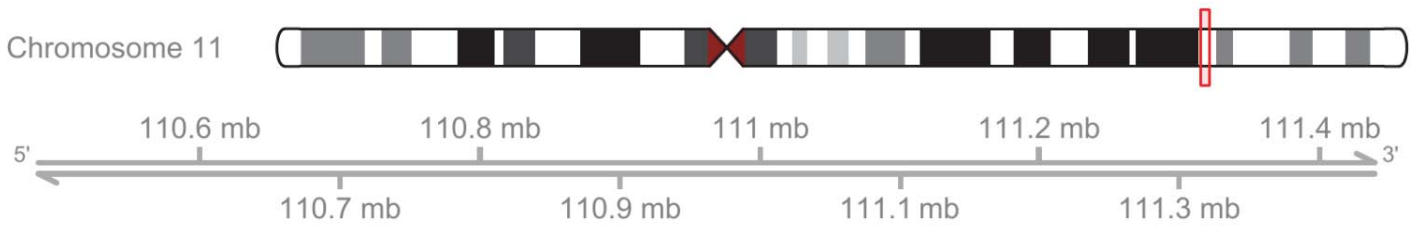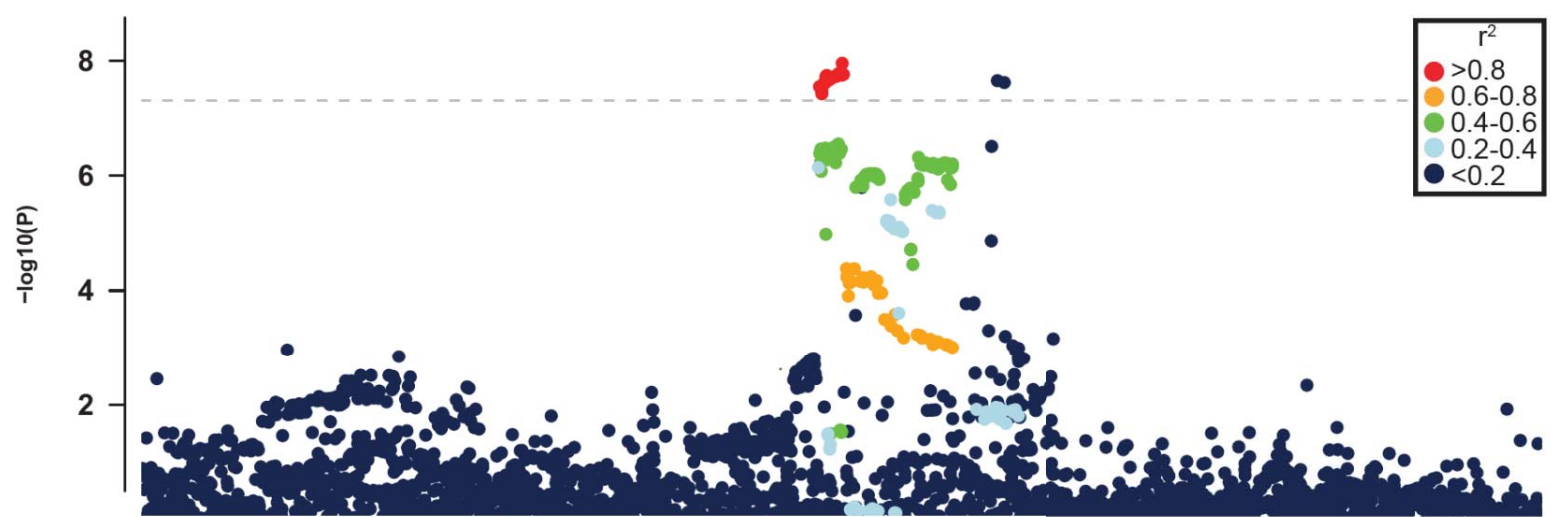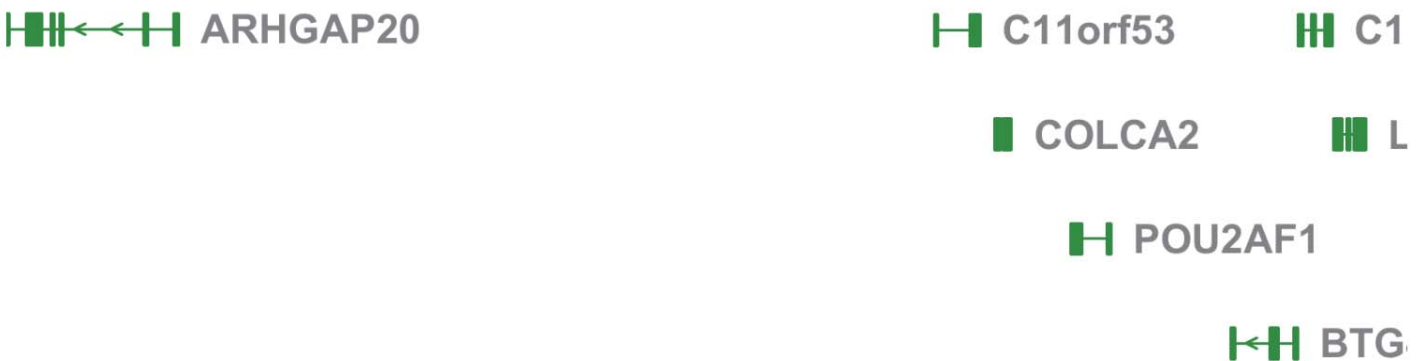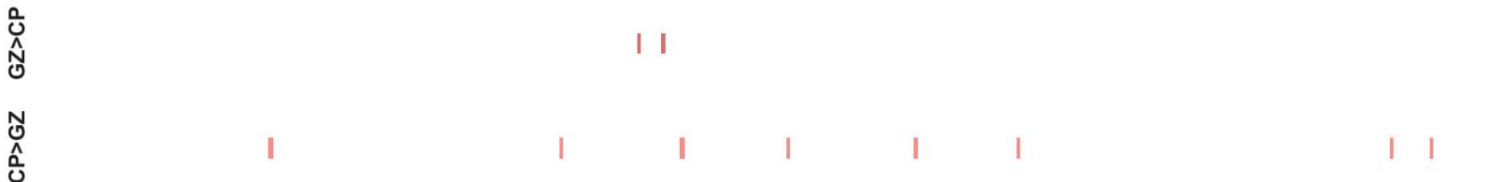

Corrected for total SA

Uncorrected

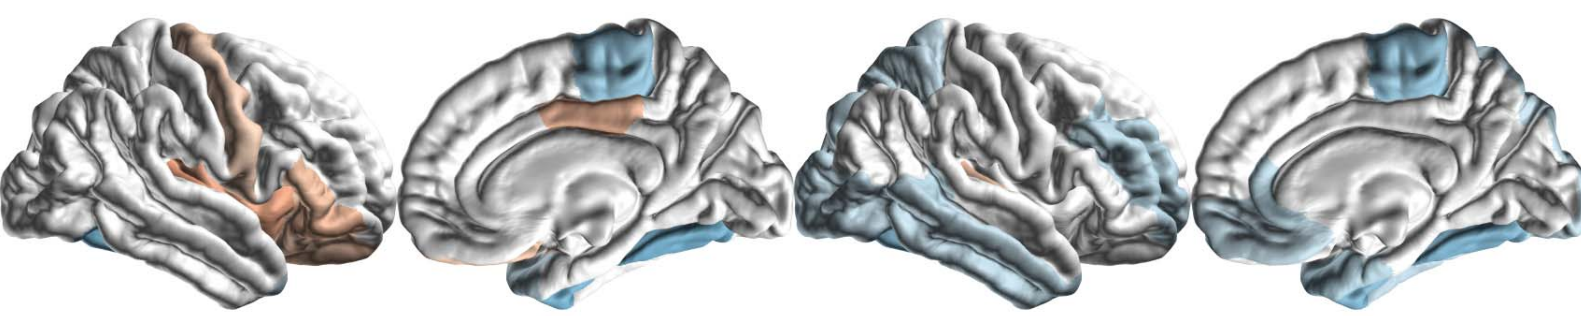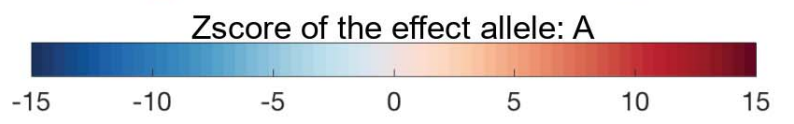

# Fusiform SA: rs17834032

Chromosome 14

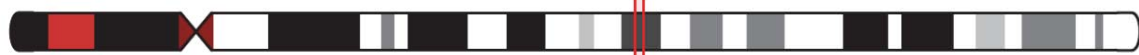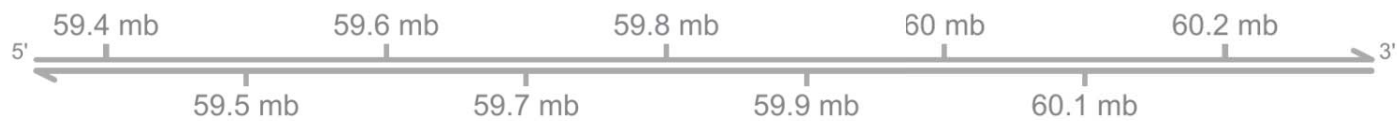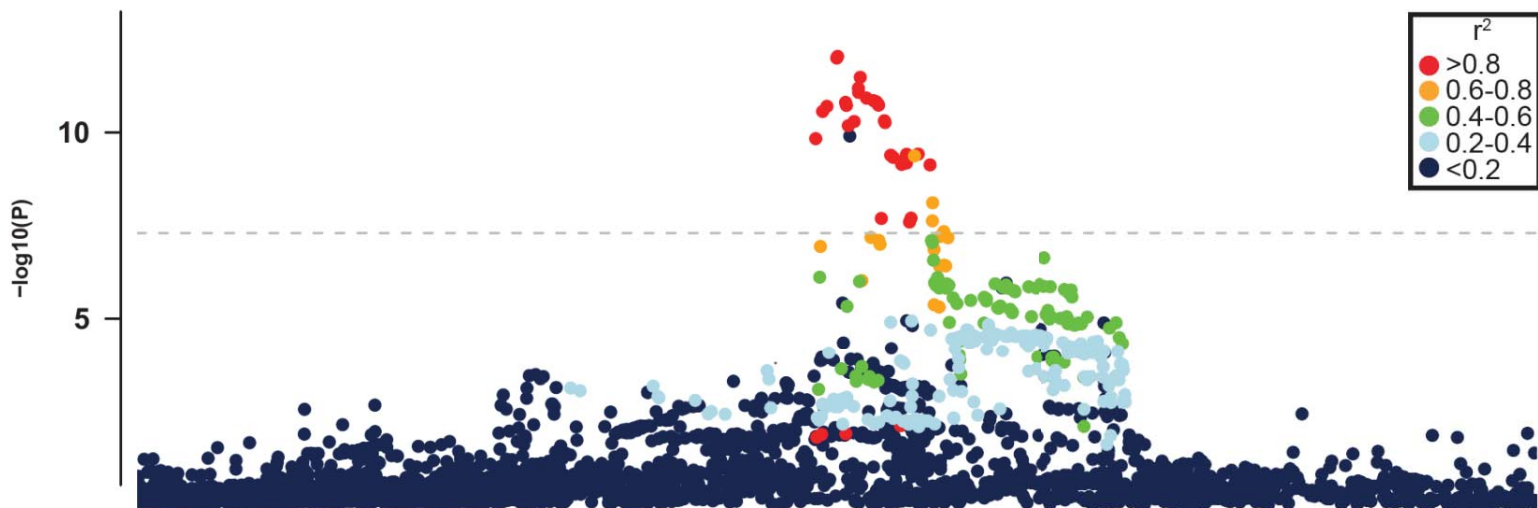

DAAM1 JKAMP

GPR135

L3HYPDH

CCDC175

CP>GZ GZ>CP

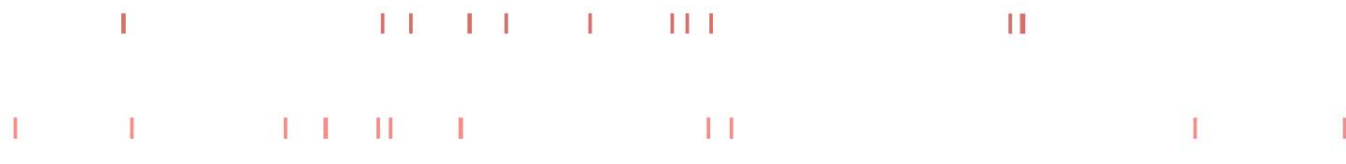

Corrected for total SA

Uncorrected

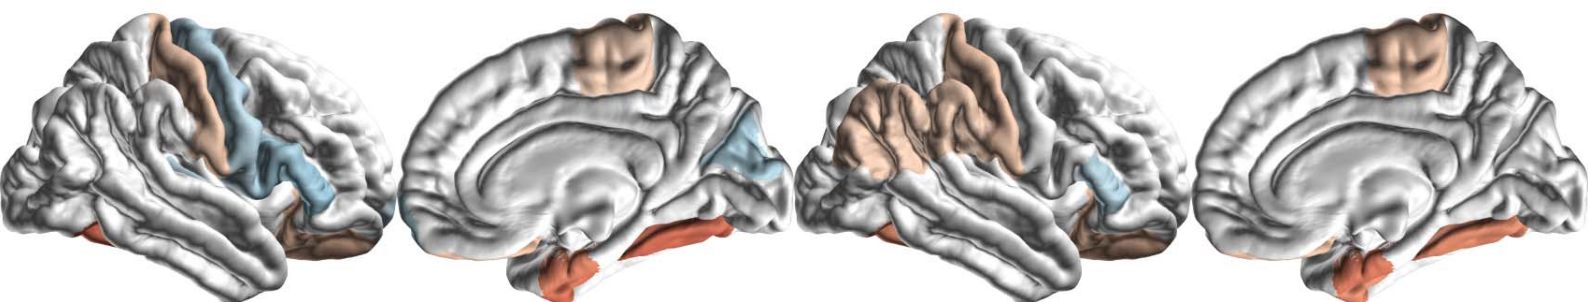

Zscore of the effect allele: T



# Fusiform SA: rs2074404

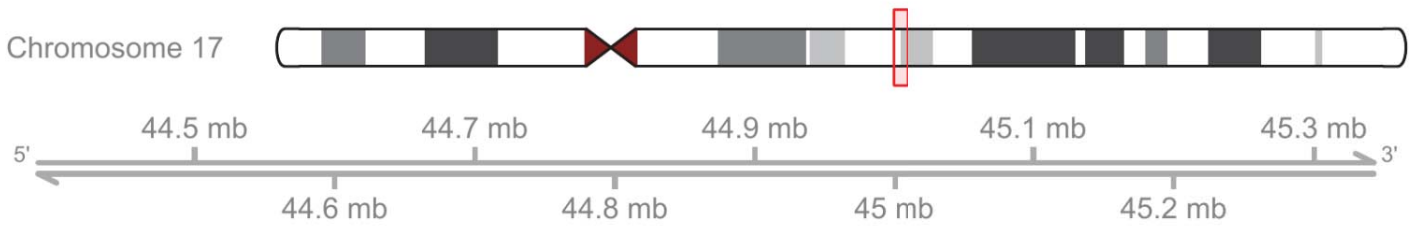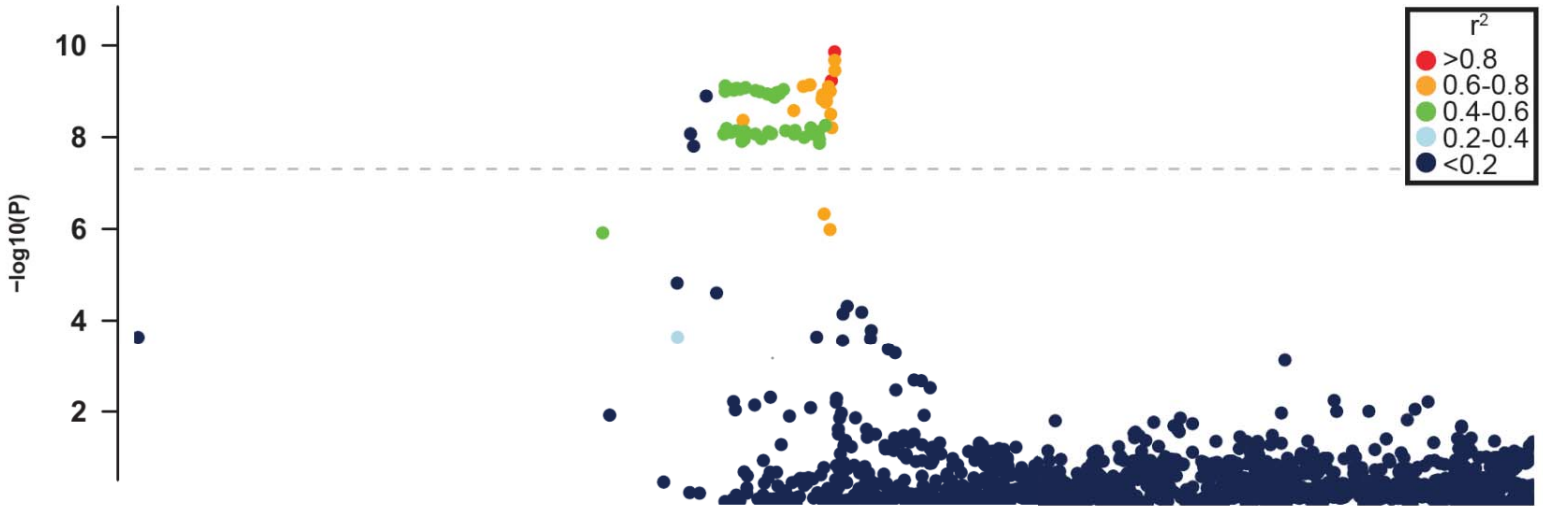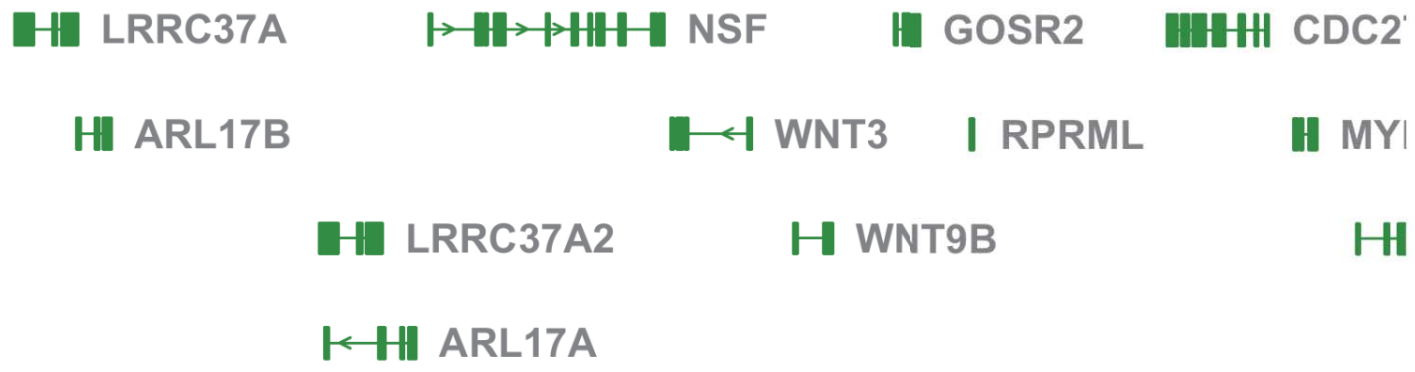

CP>GZ GZ>CP

Corrected for total SA

Uncorrected

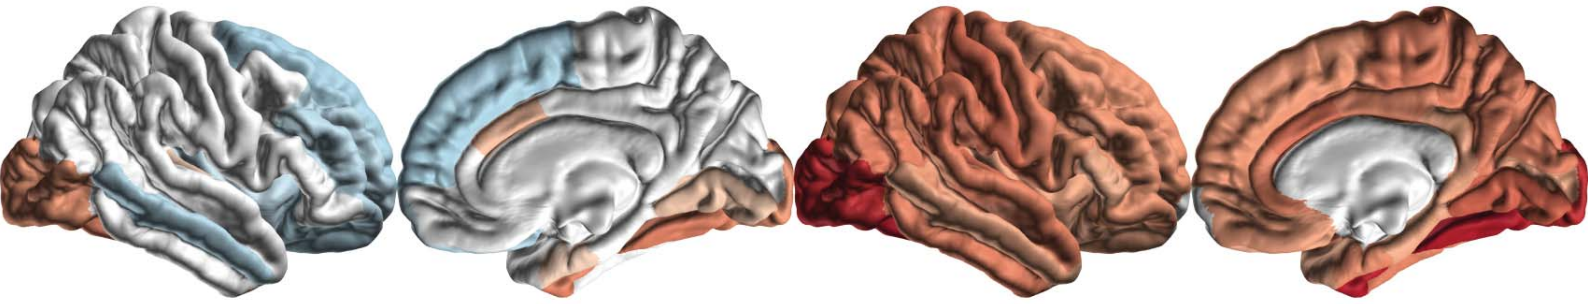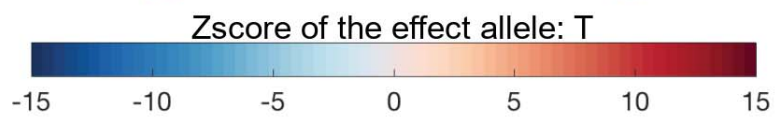



# Temporal Pole SA: rs6855246

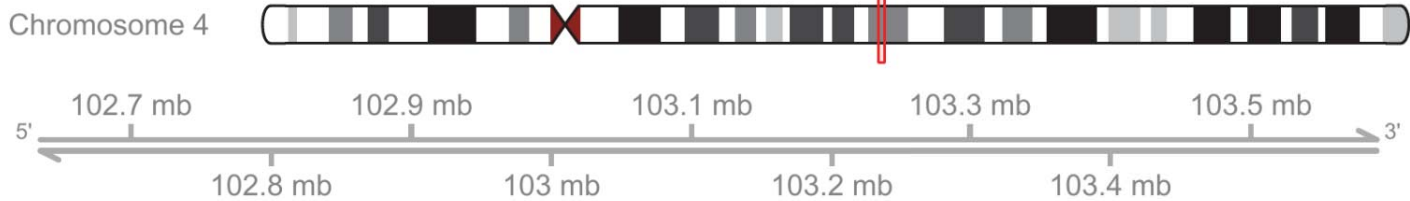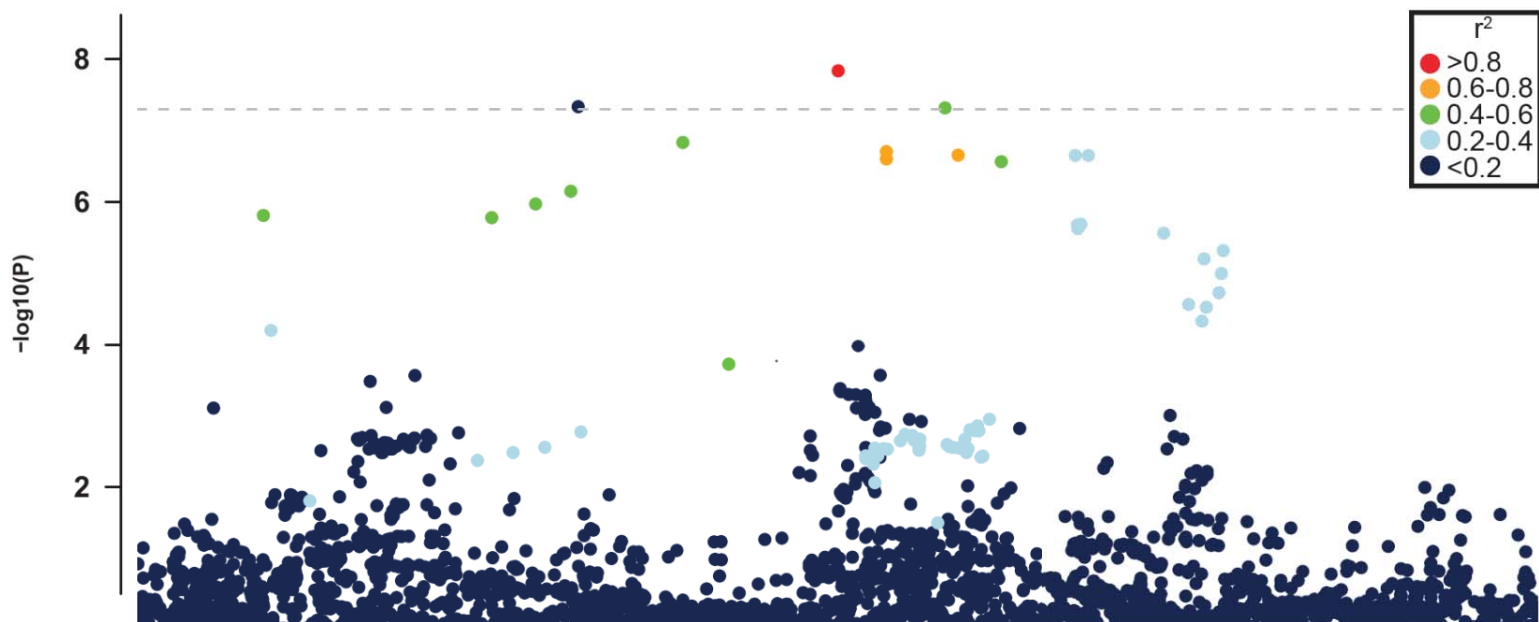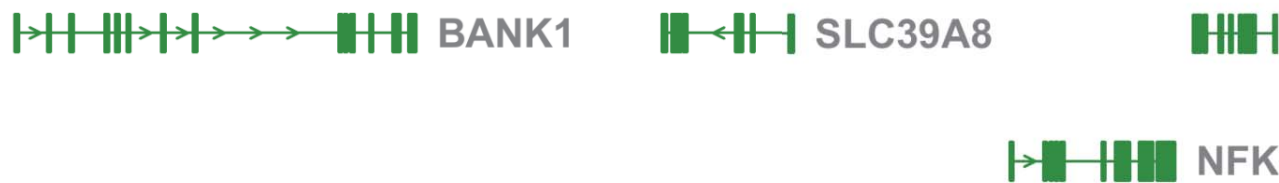

GZ>CP

CP>GZ

Corrected for total SA

Uncorrected

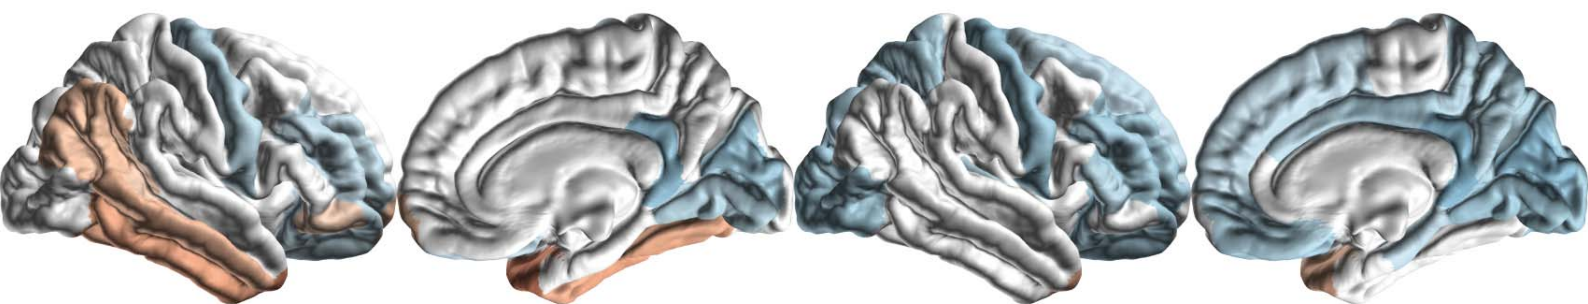

Zscore of the effect allele: A



# Inferior Temporal SA: rs9309013

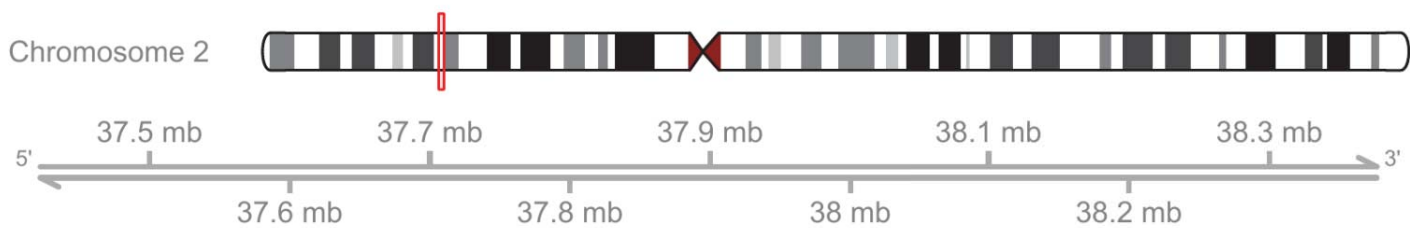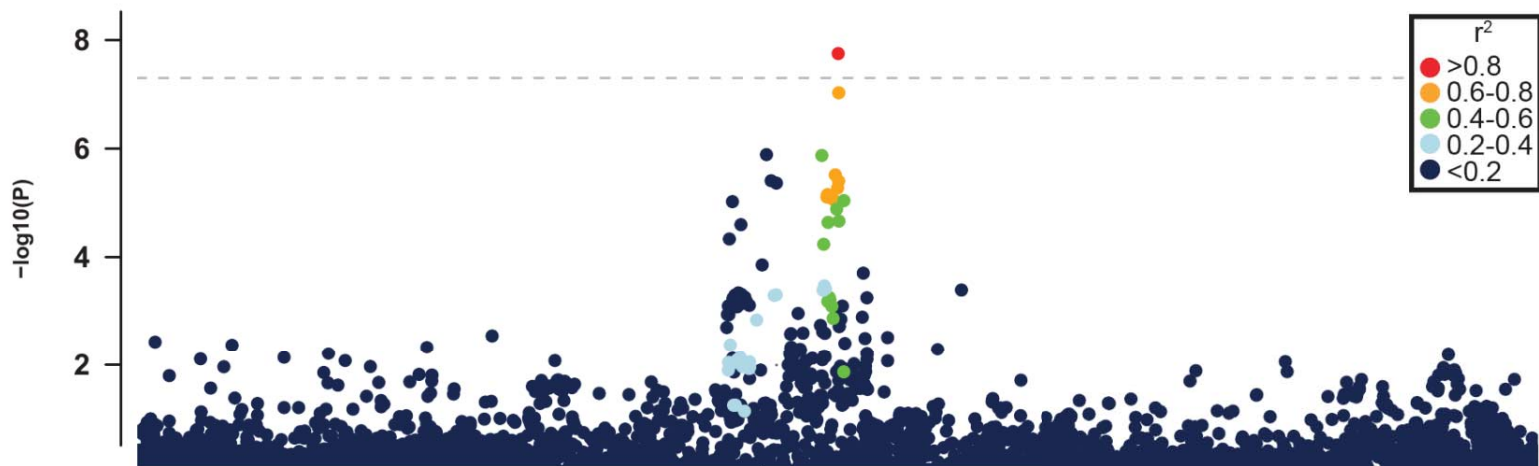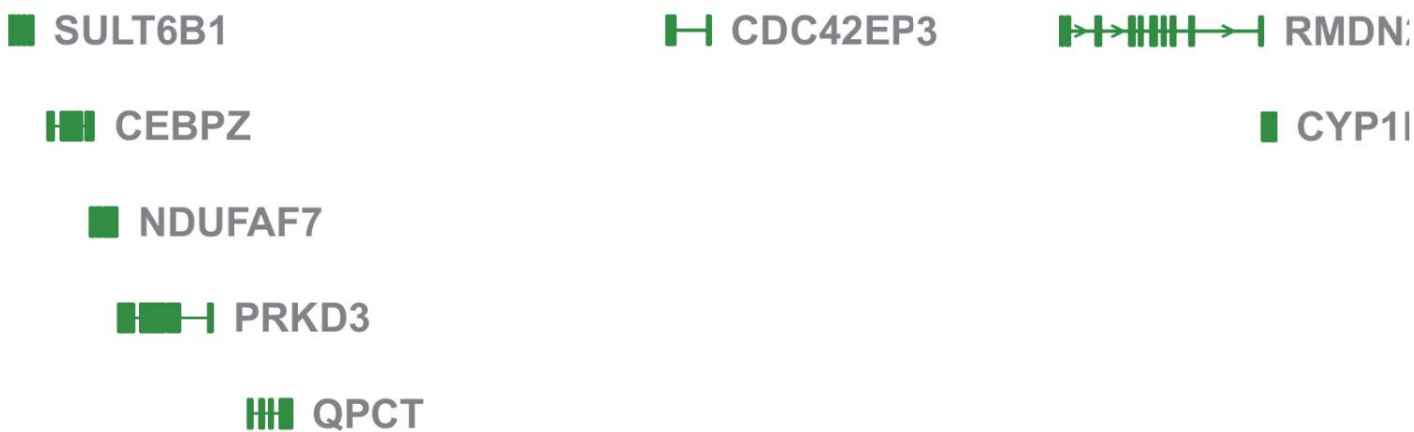

CP>GZ GZ>CP

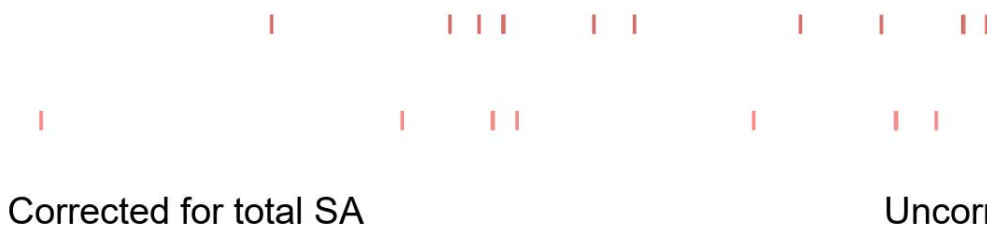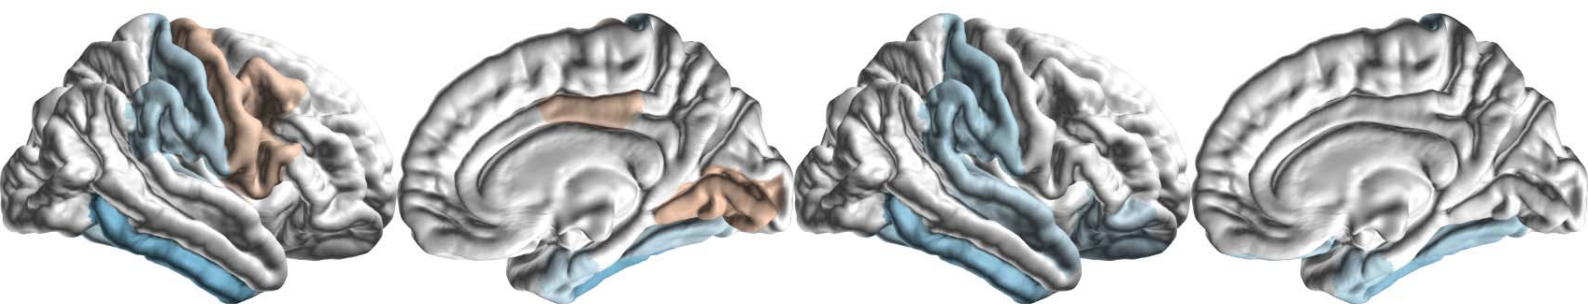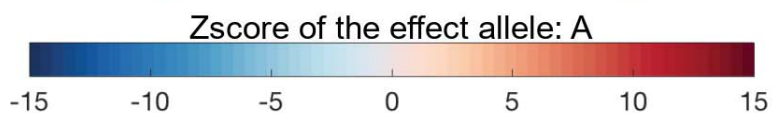

### Inferior Temporal SA: rs73006837

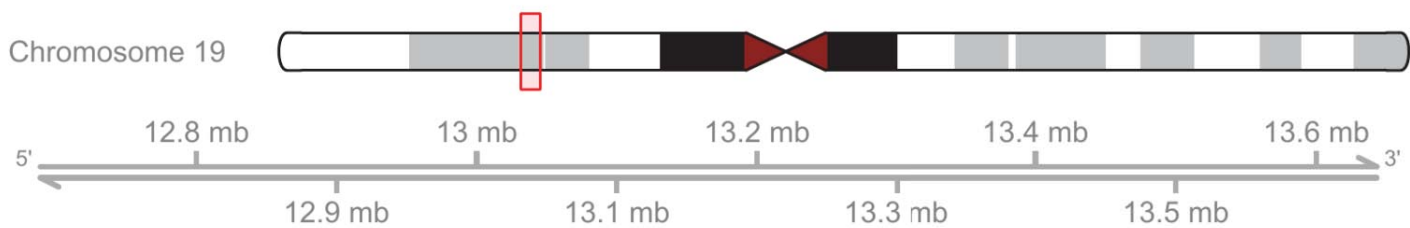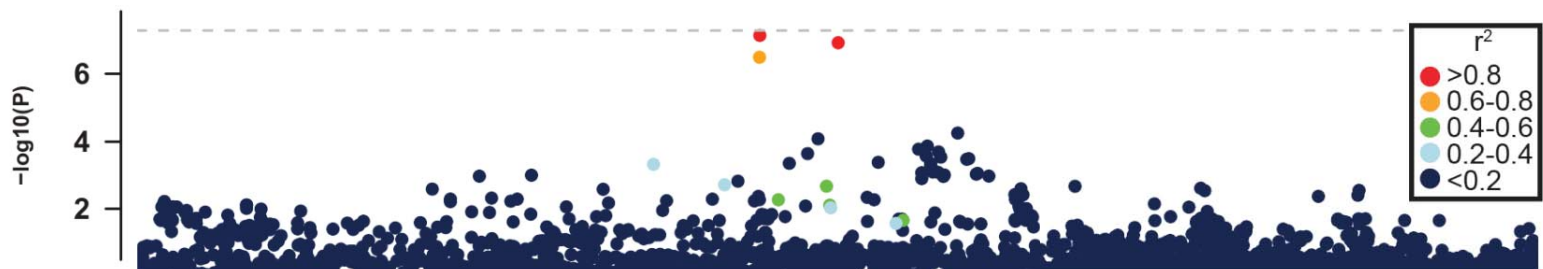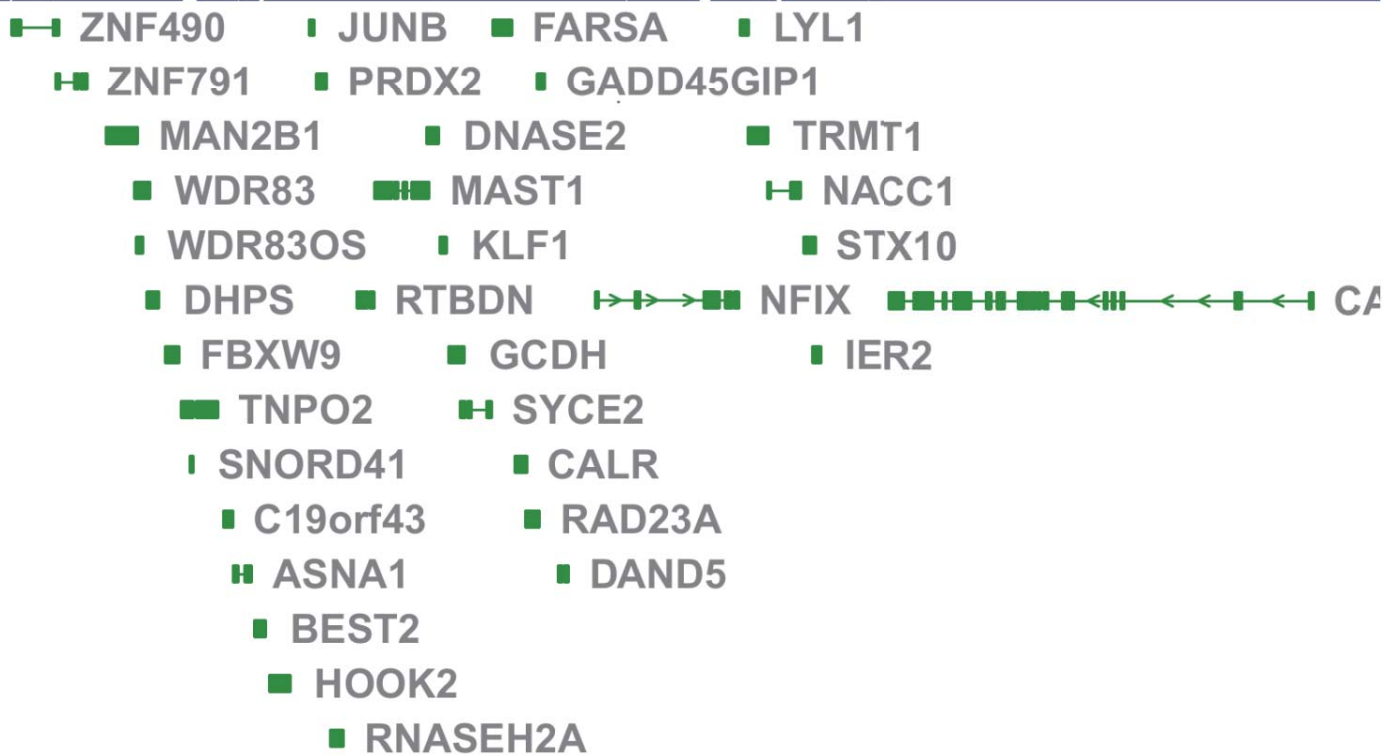

CP>GZZ>CP

Corrected for total SA

Uncorrected

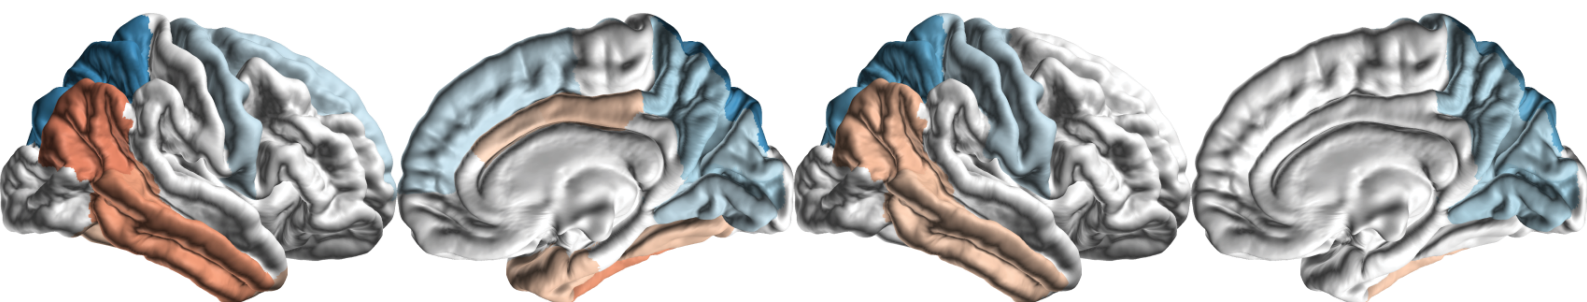

Zscore of the effect allele: T

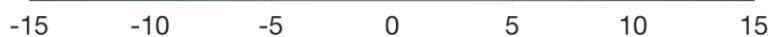



# Middle Temporal SA: rs1344762

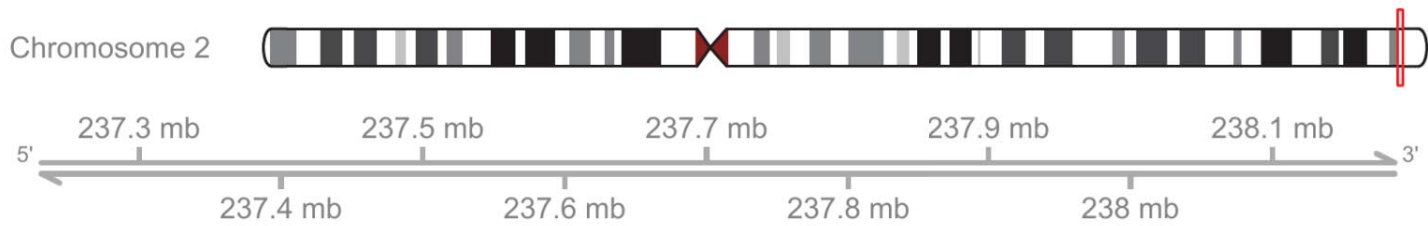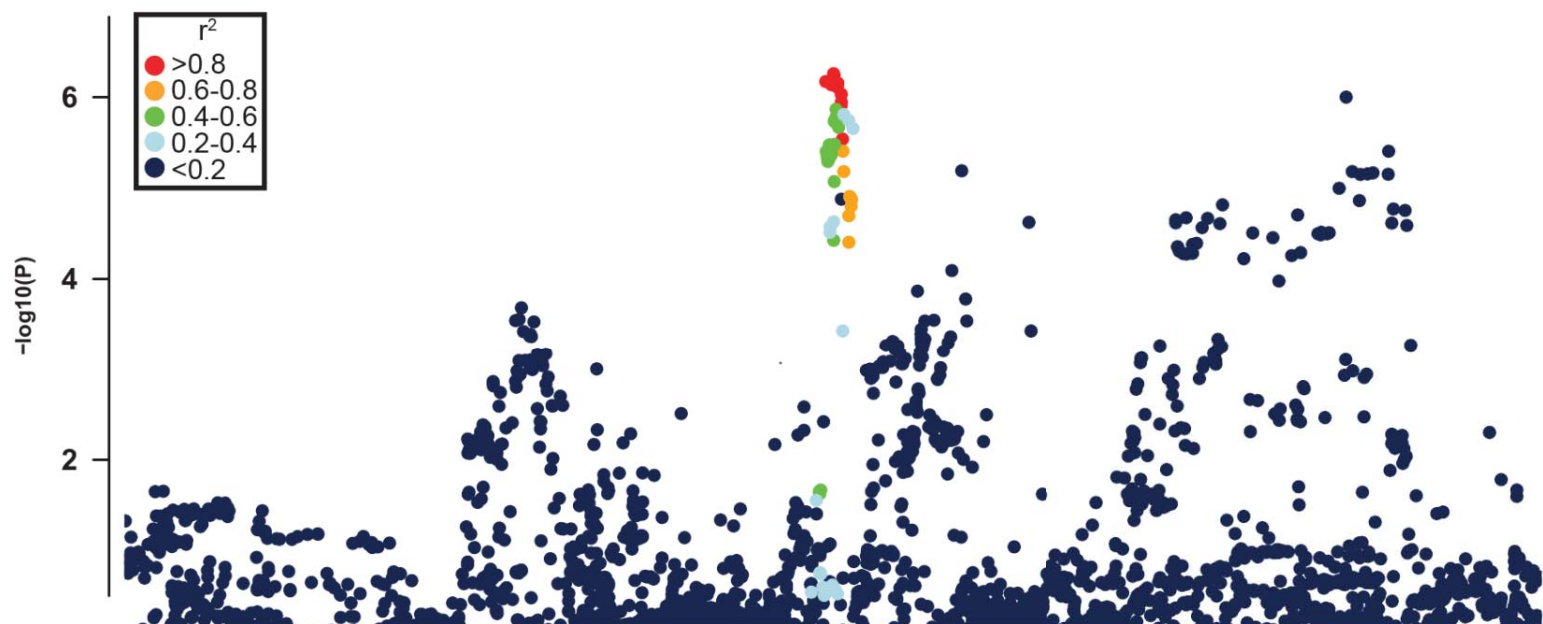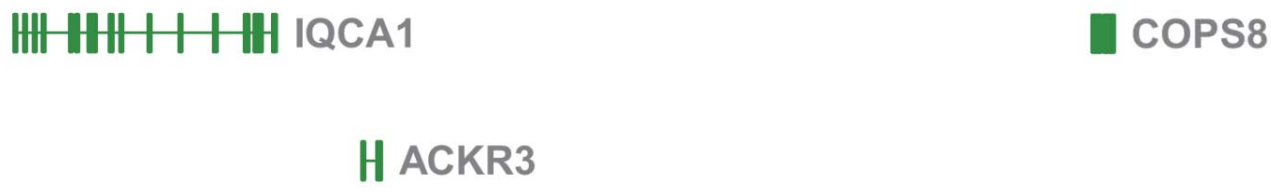

Corrected for total SA

Uncorrected

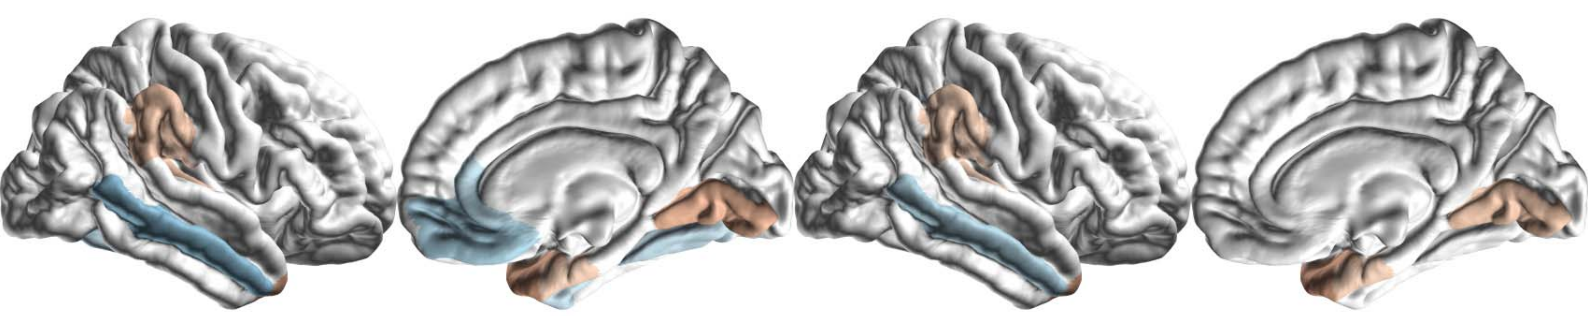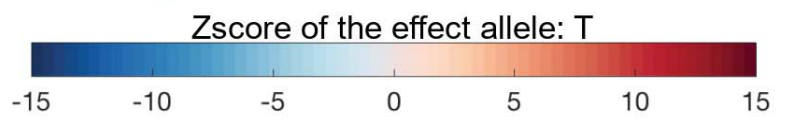

# Middle Temporal SA: rs141834426

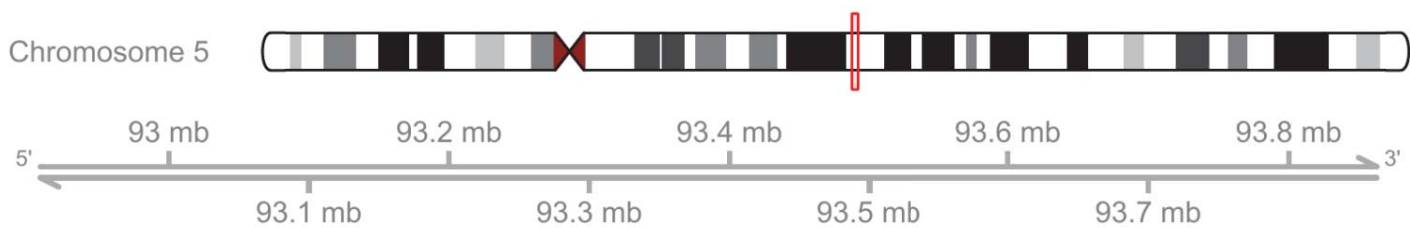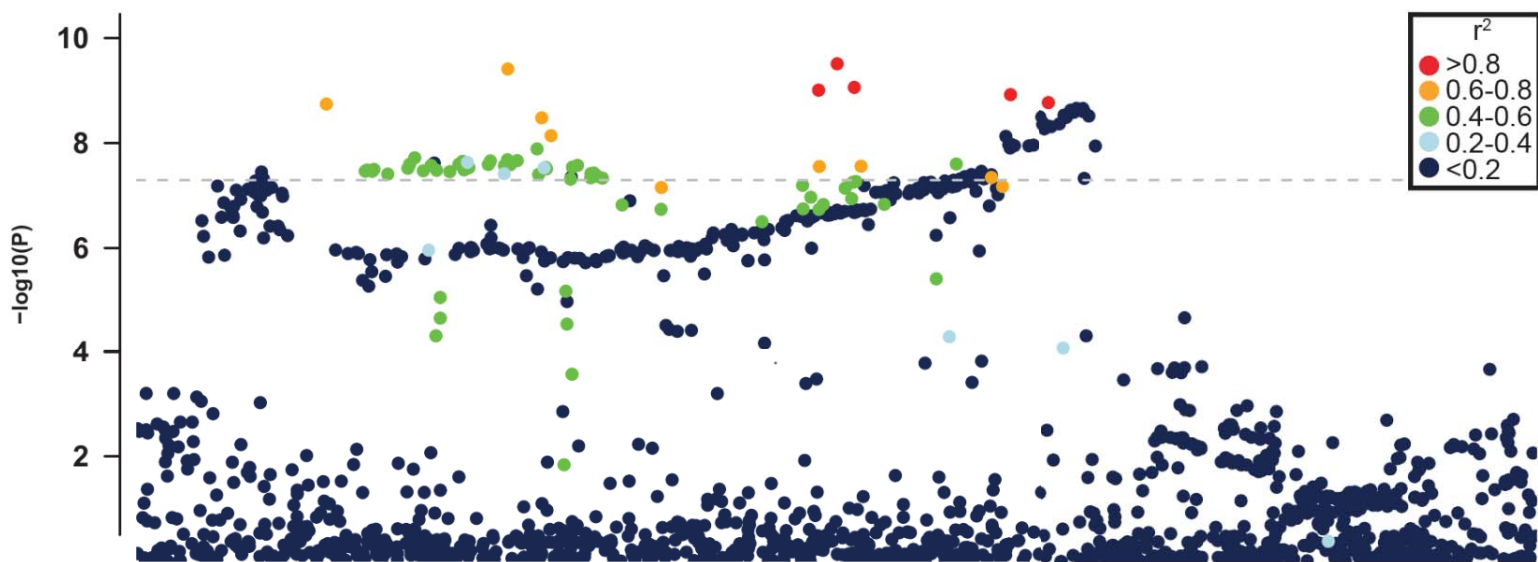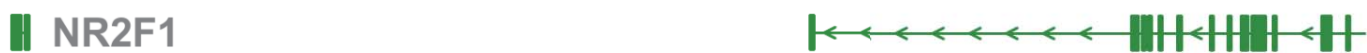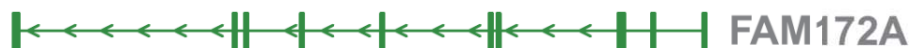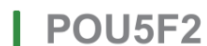

GZ>CP  
CP>GZ

Corrected for total SA

Uncorrected

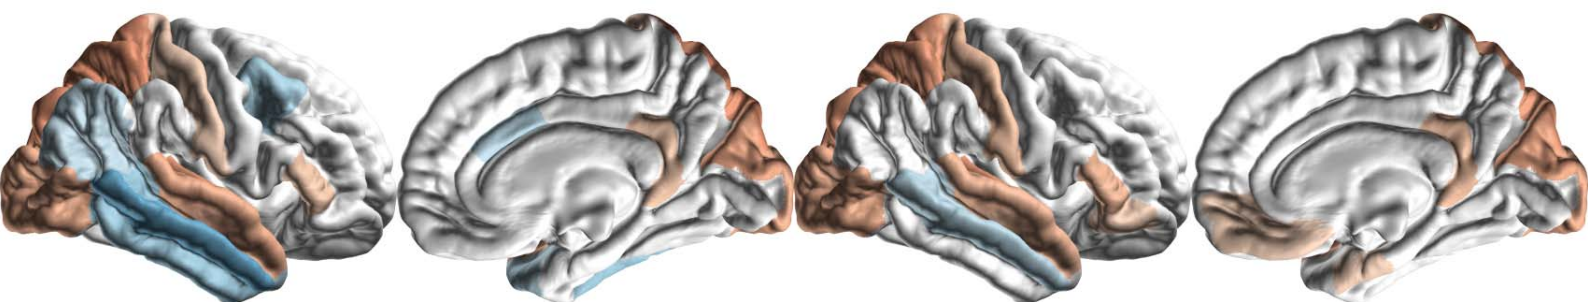

Zscore of the effect allele: C



# Middle Temporal SA: rs17376456

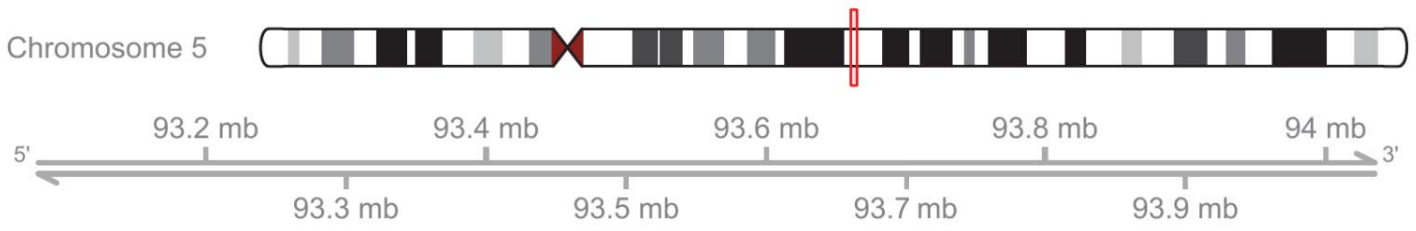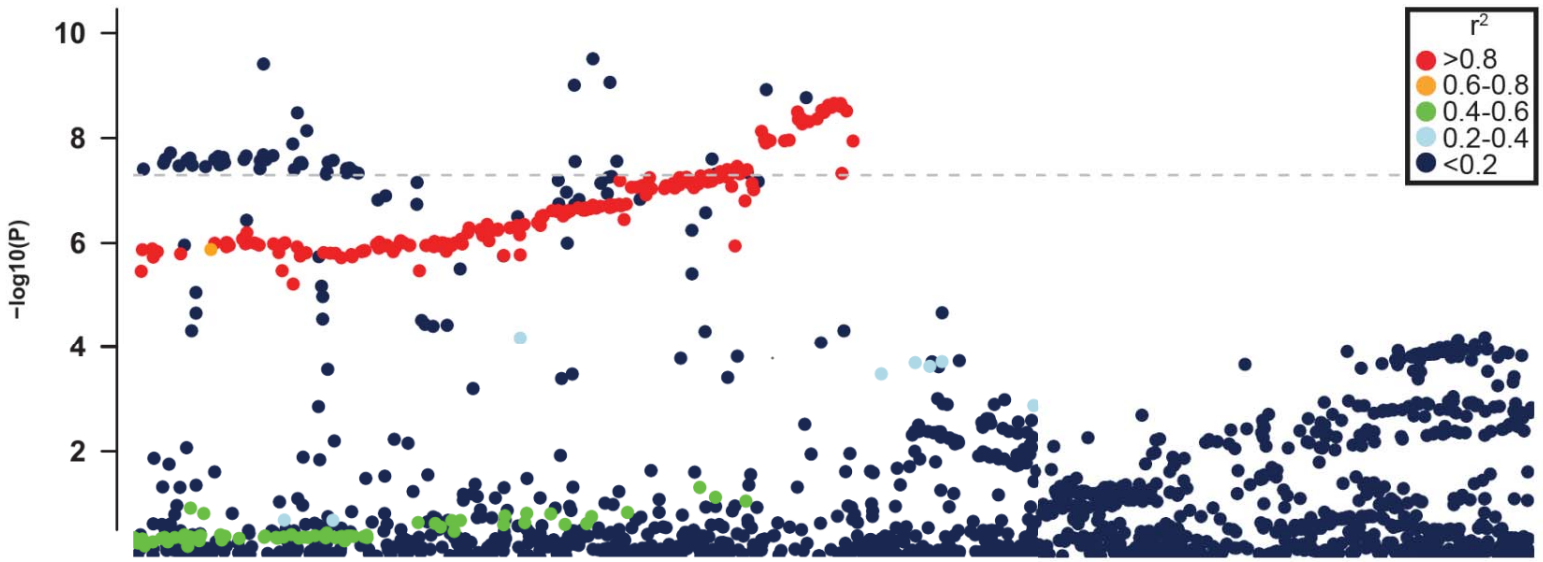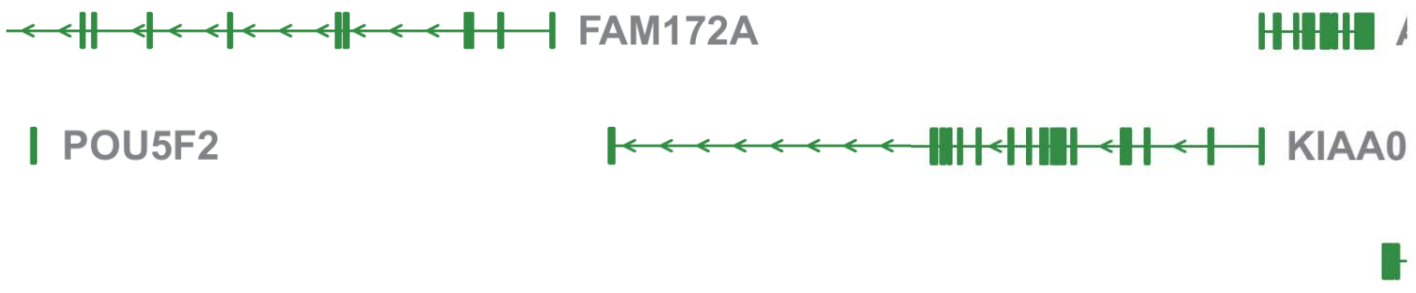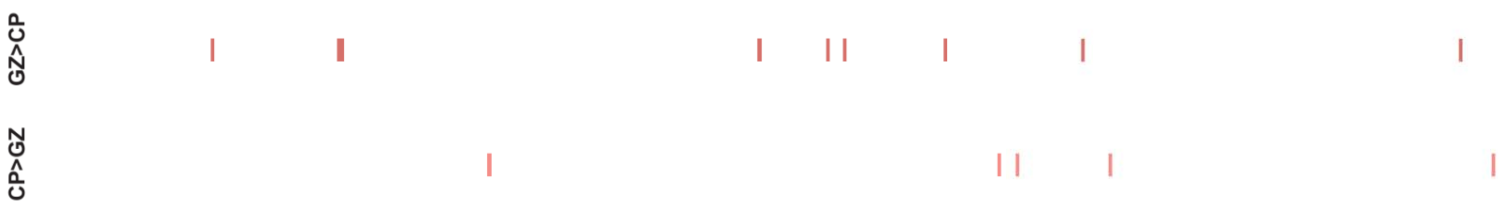

Corrected for total SA

Uncorrected

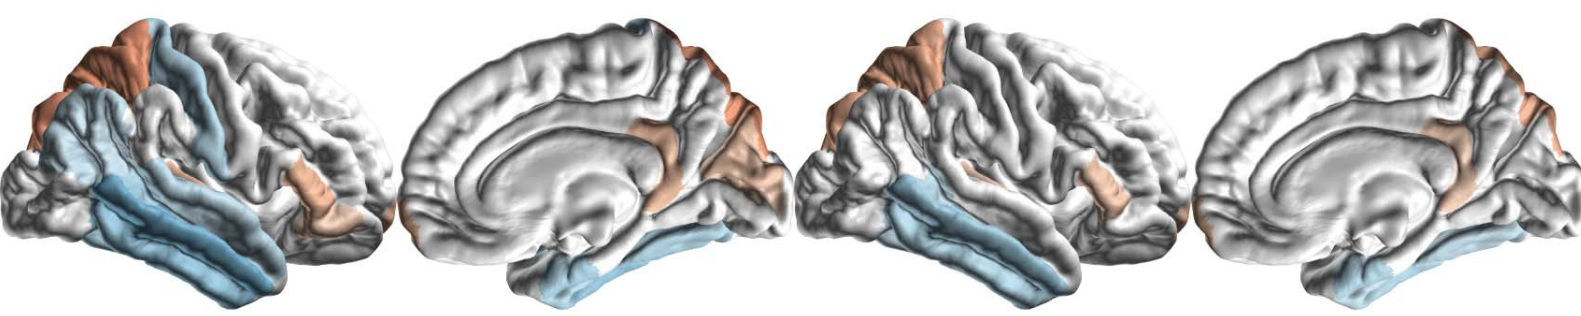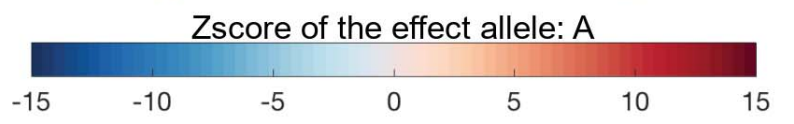



# Middle Temporal SA: rs9328010

Chromosome 5

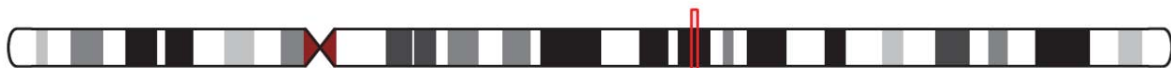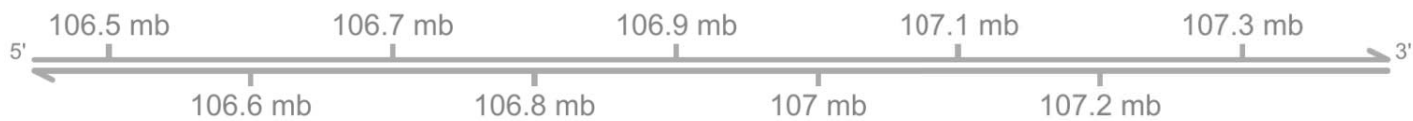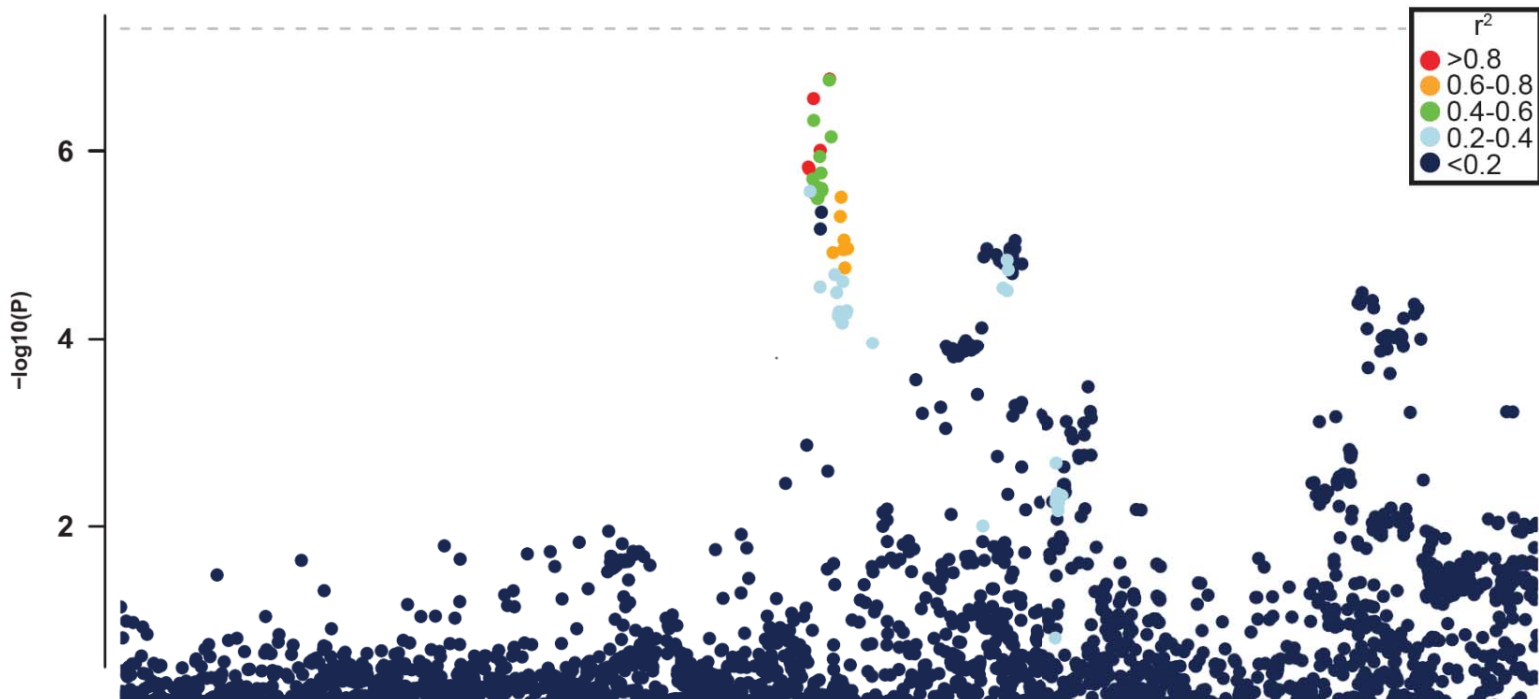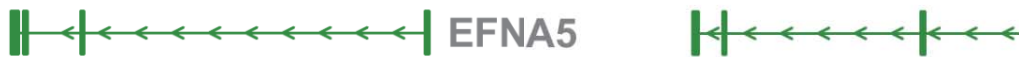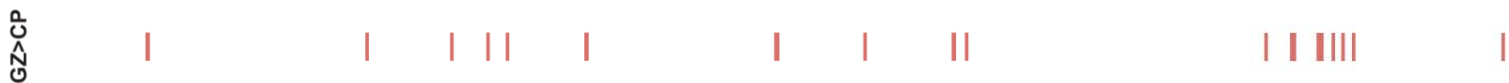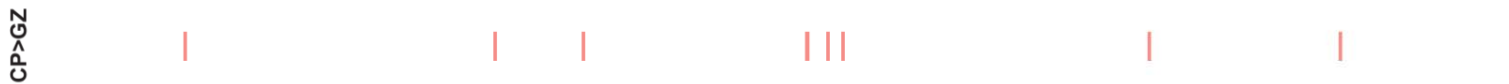

Corrected for total SA

Uncorrected

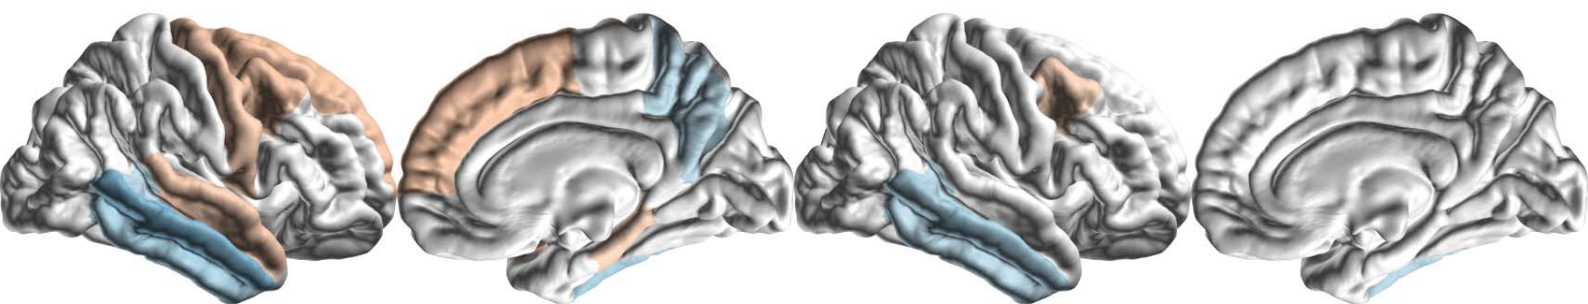

Zscore of the effect allele: A



# Middle Temporal SA: rs73006822

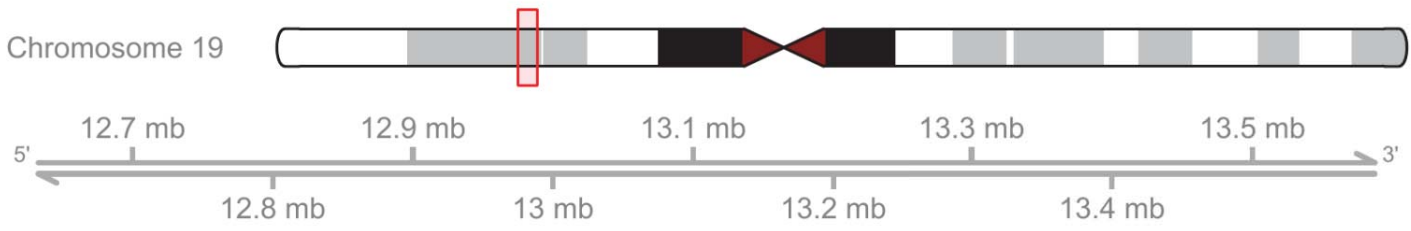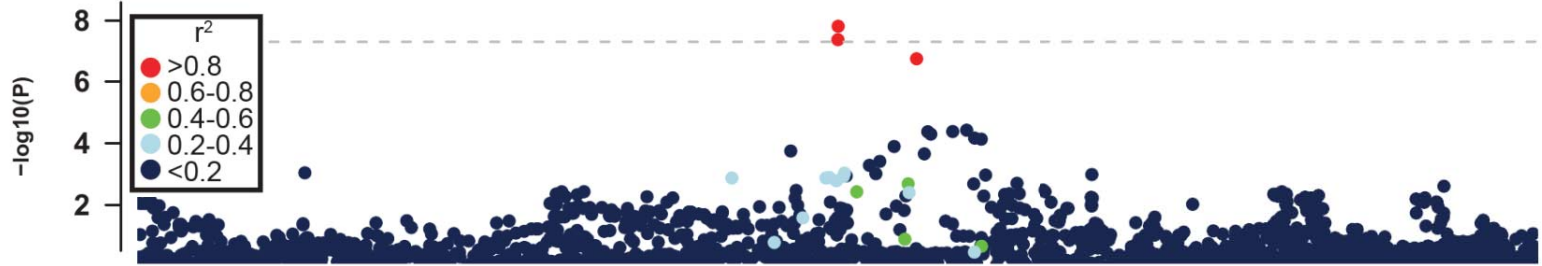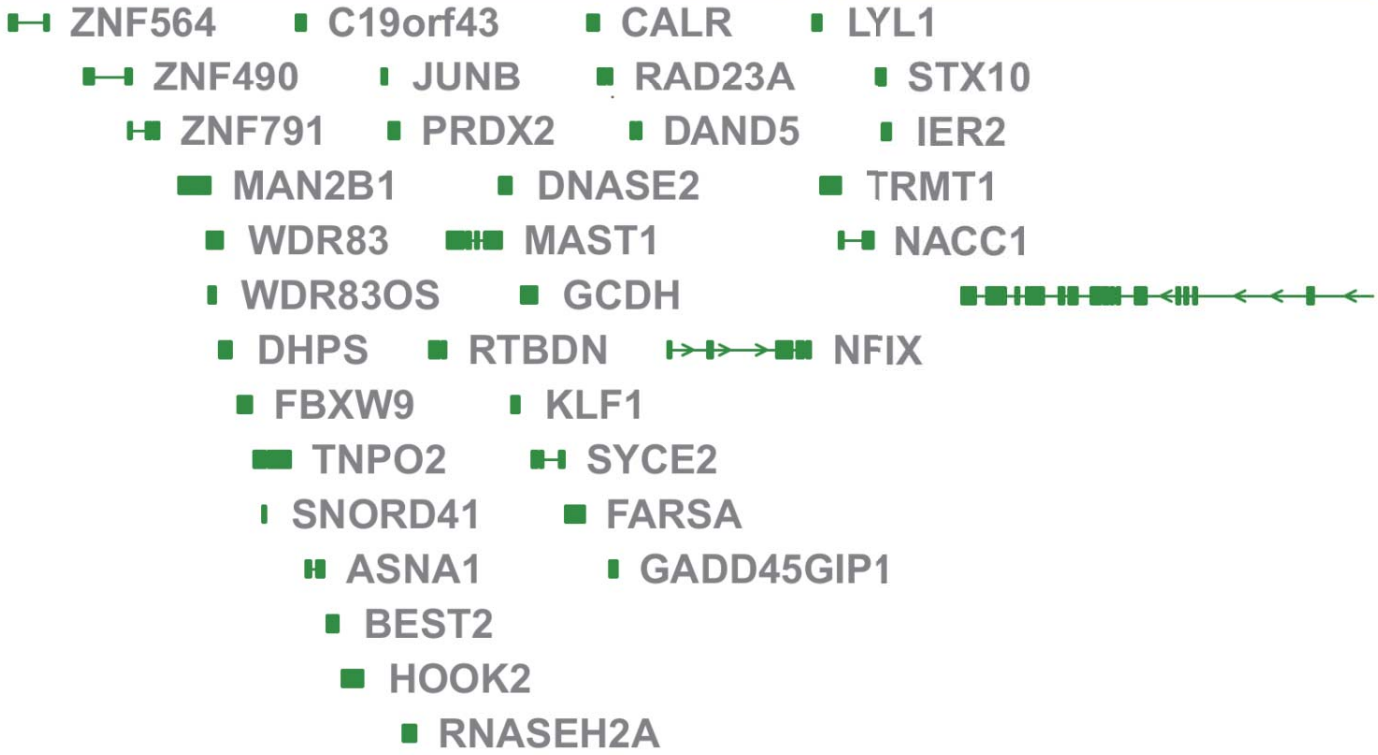

CP>GZZ>CP

Corrected for total SA

Uncorrected

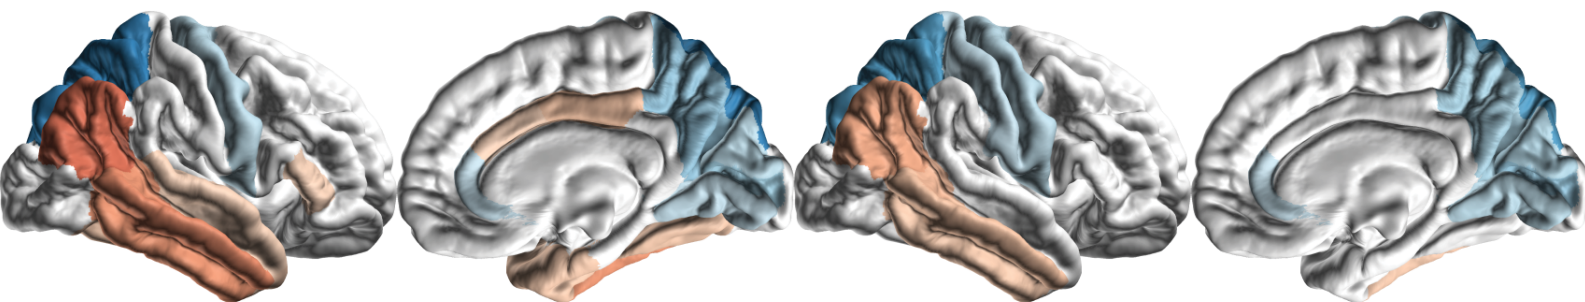

Zscore of the effect allele: T

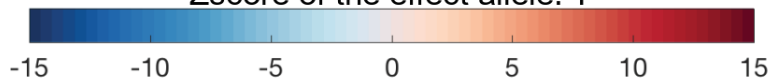

# Middle Temporal TH: rs160459

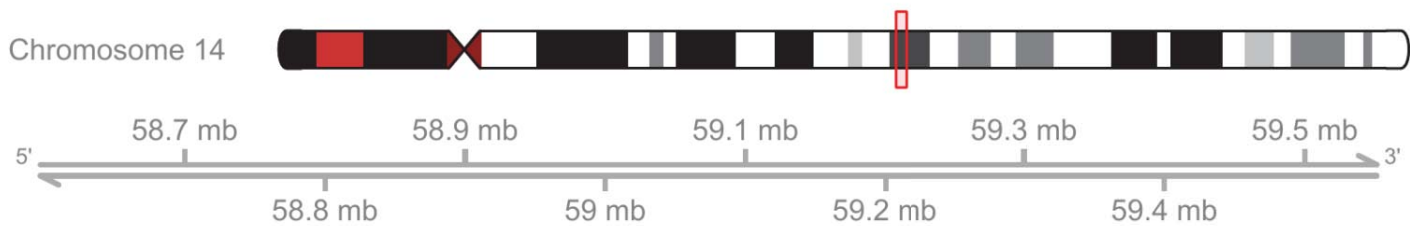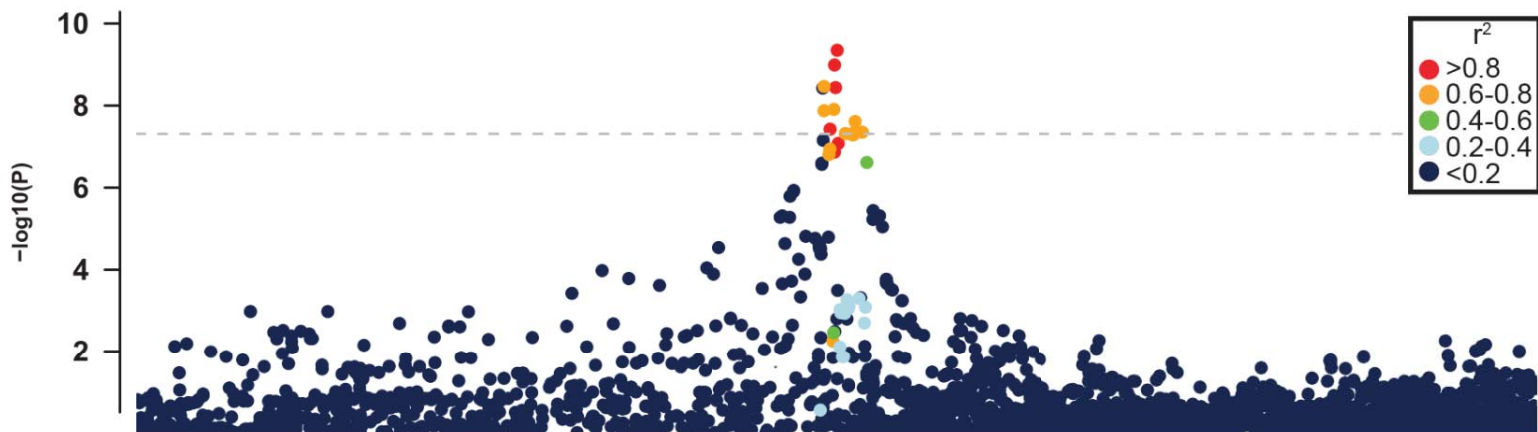

C14orf37 ARID4A DACT1

ACTR10 TOMM20L

PSMA3 TIMM9

KIAA0586

Angular temporal dIPFC >ingulate

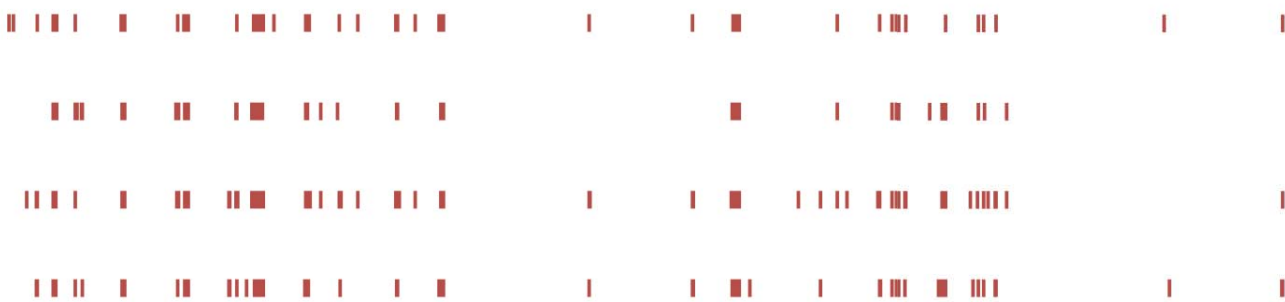

Corrected for average TH

Uncorrected

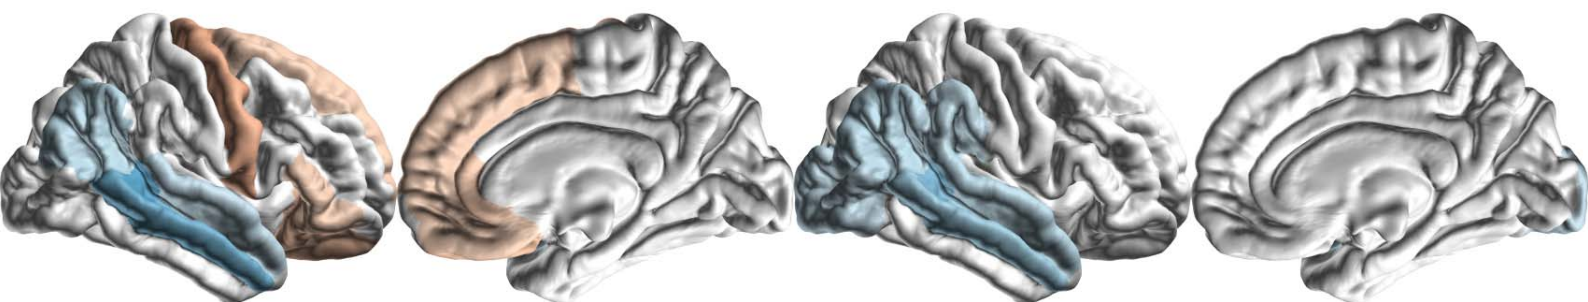

Zscore of the effect allele: A





# Superior Temporal SA: rs7601767

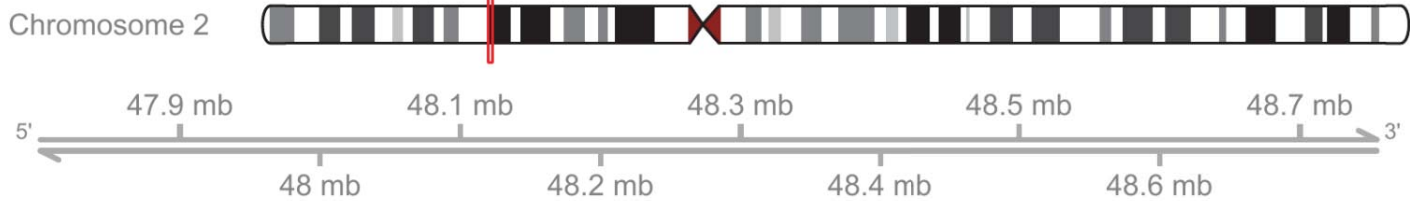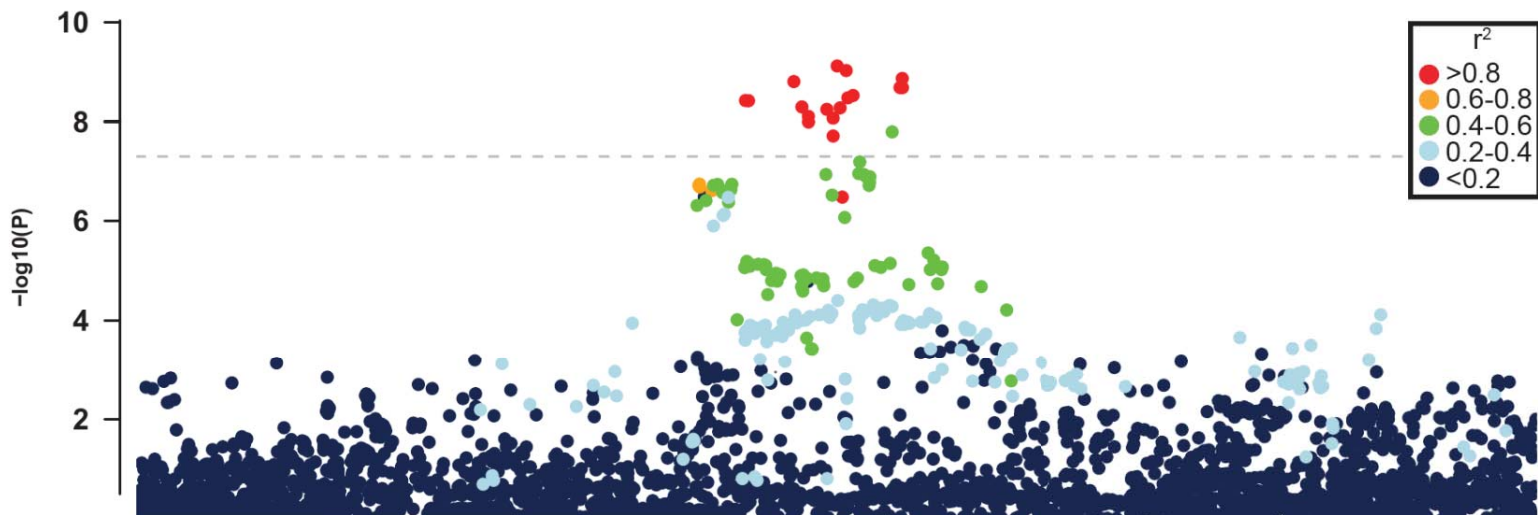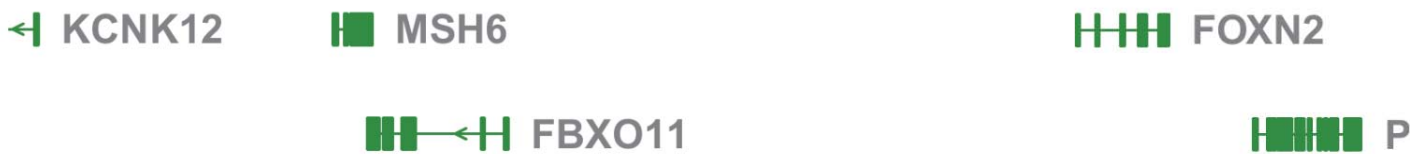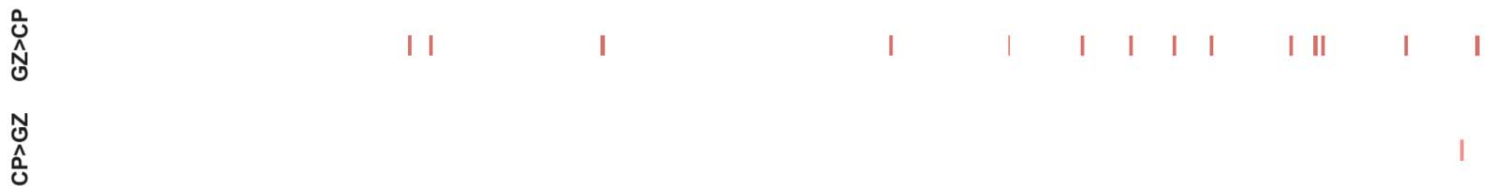

Corrected for total SA

Uncorrected

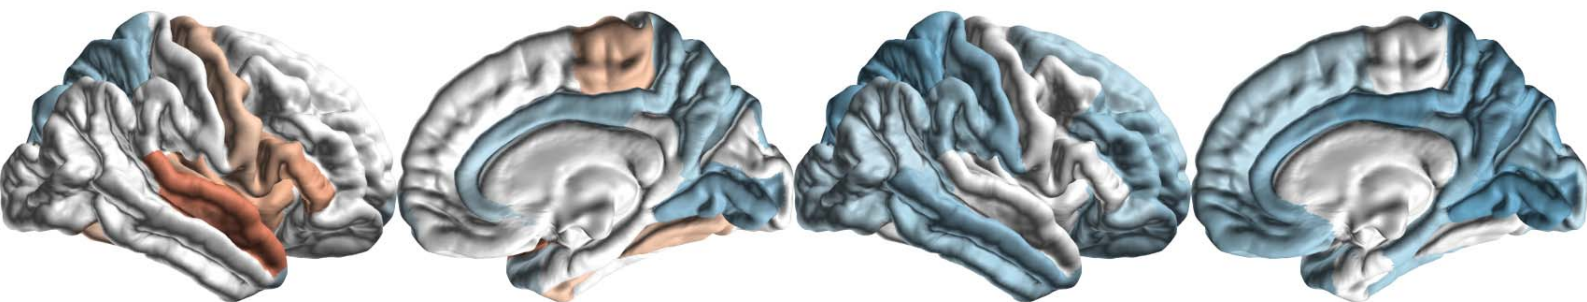

Zscore of the effect allele: A



# Superior Temporal SA: rs13011264

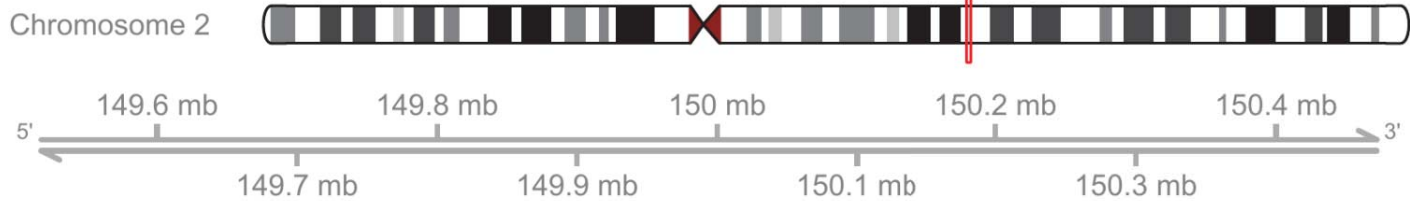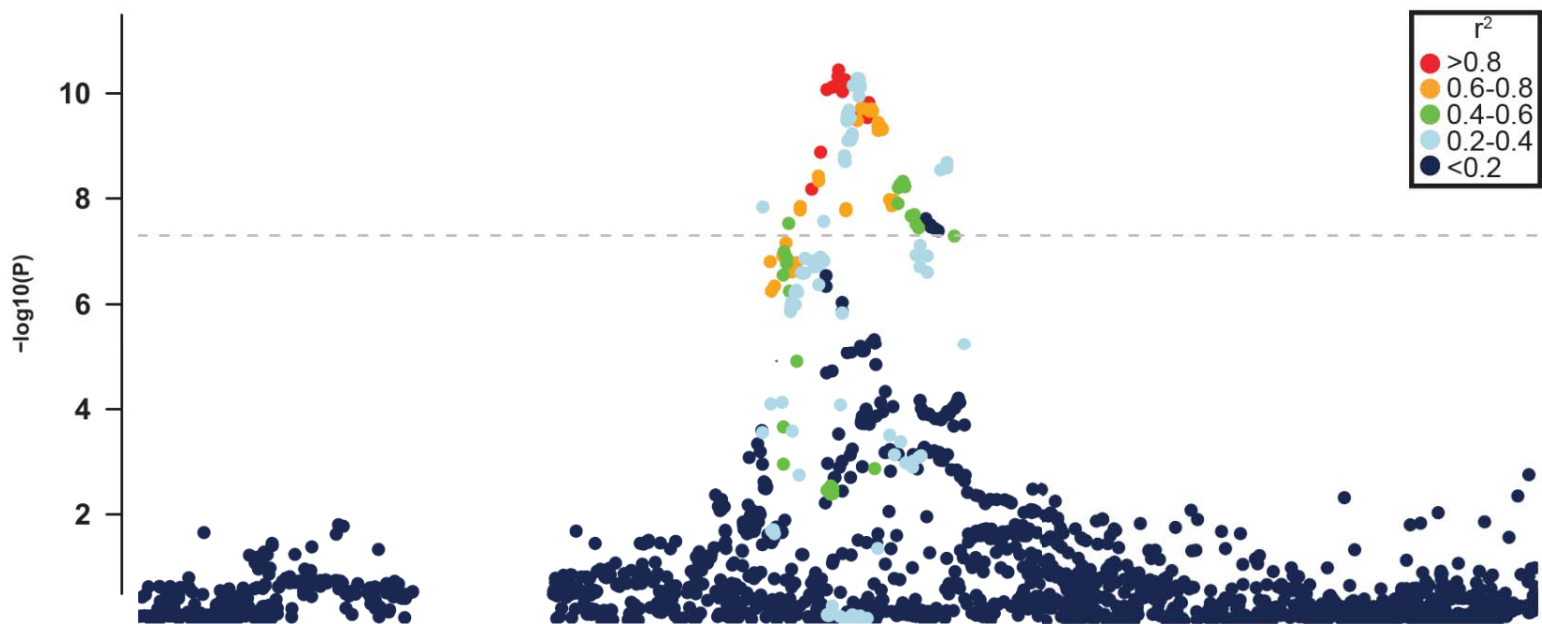

EPC2

KIF5C

LYPD6

LYPD6B

MI

GZ>CP

CP>GZ

Corrected for total SA

Uncorrected

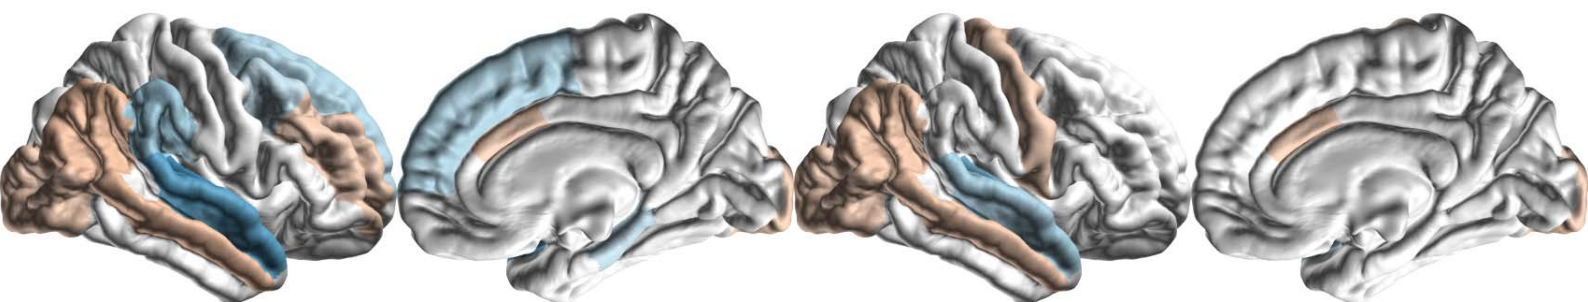

Zscore of the effect allele: A



# Superior Temporal SA: rs4841029

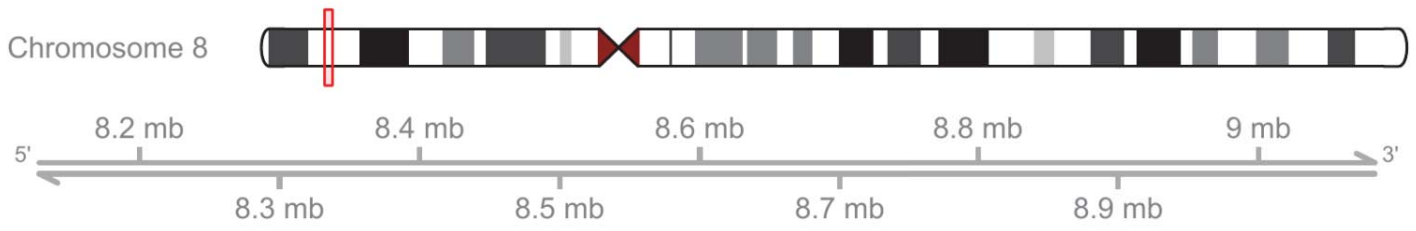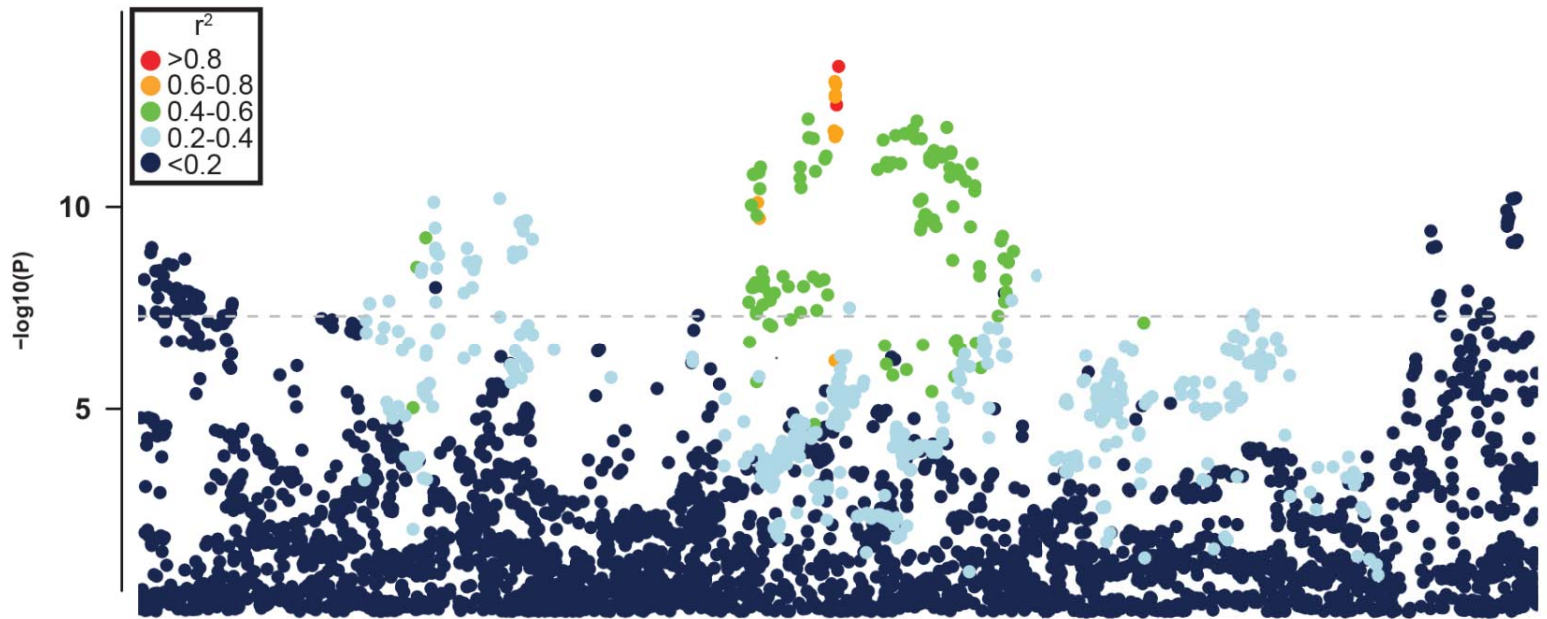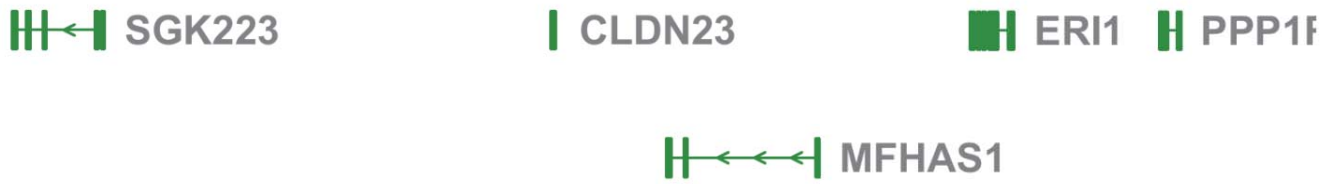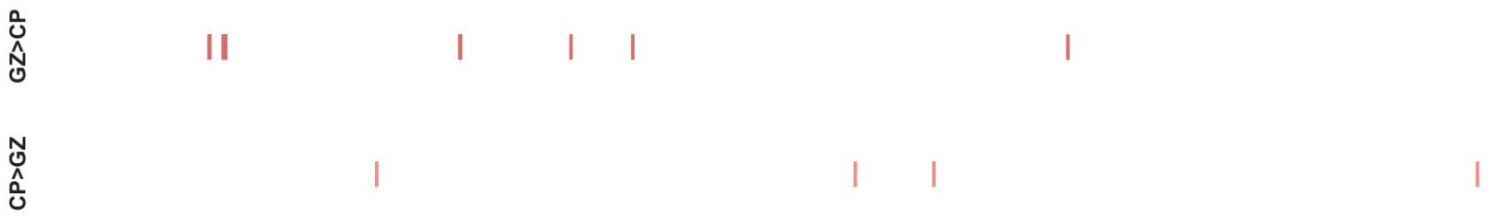

Corrected for total SA

Uncorrected

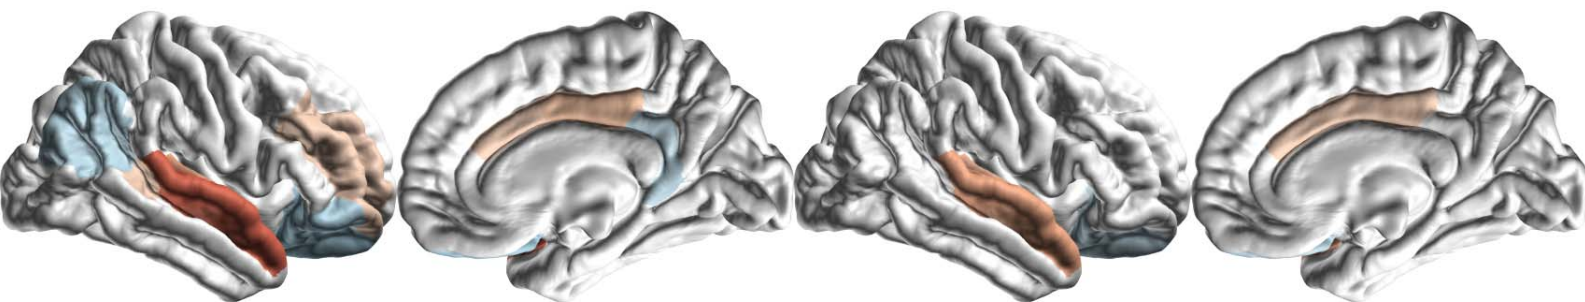

Zscore of the effect allele: A





# Superior Temporal SA: rs115241741

Chromosome 15

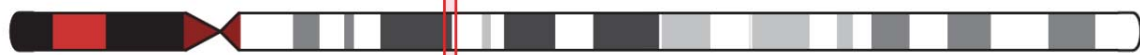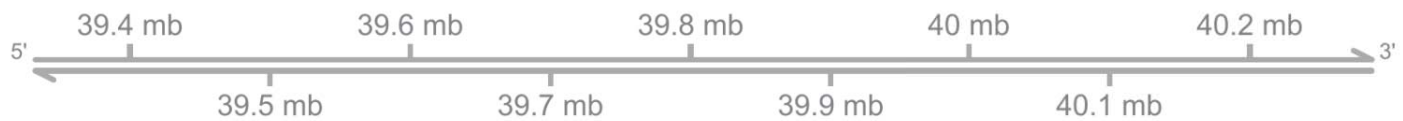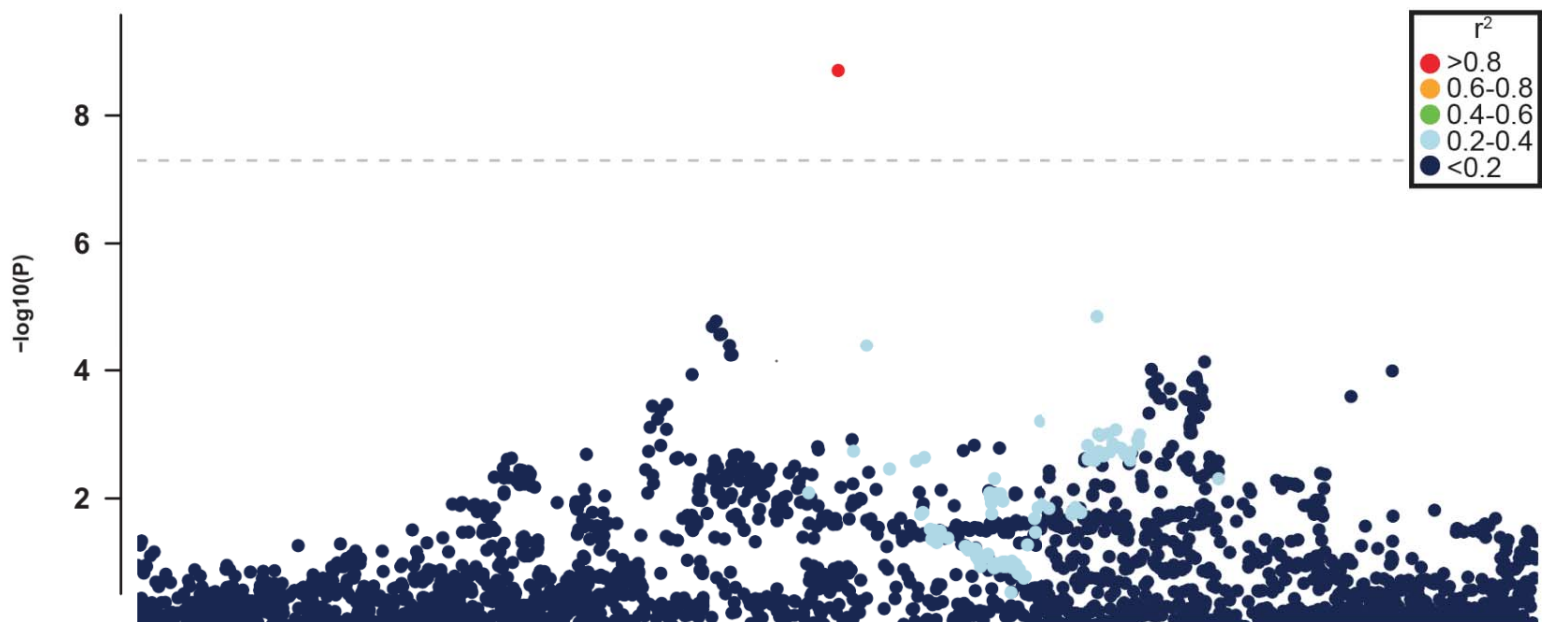

C15orf54

THBS1

GPR17

FSIP1

GZ>CP

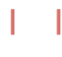

CP>GZ

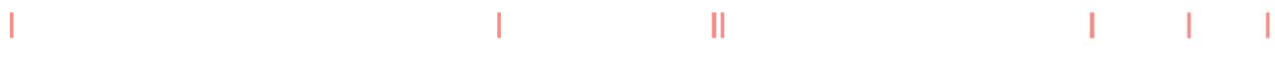

Corrected for total SA

Uncorrected

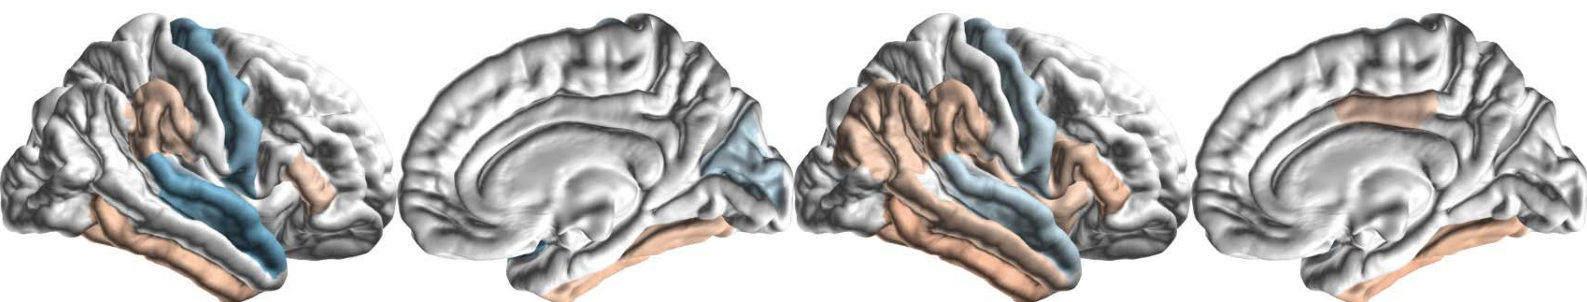

Zscore of the effect allele: A



# Superior Temporal TH: rs6658111

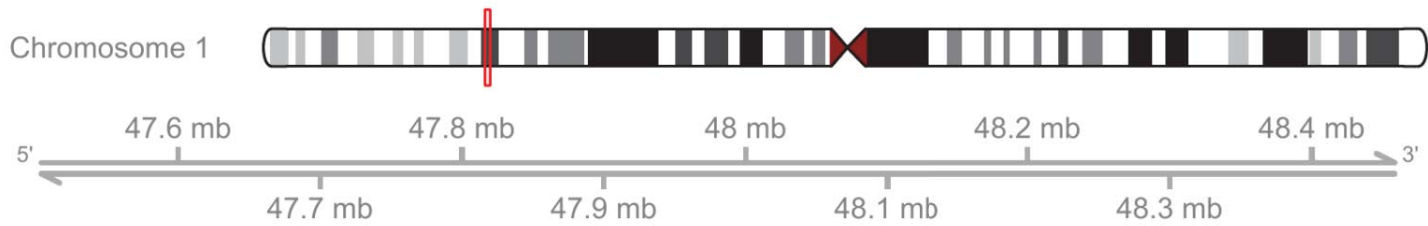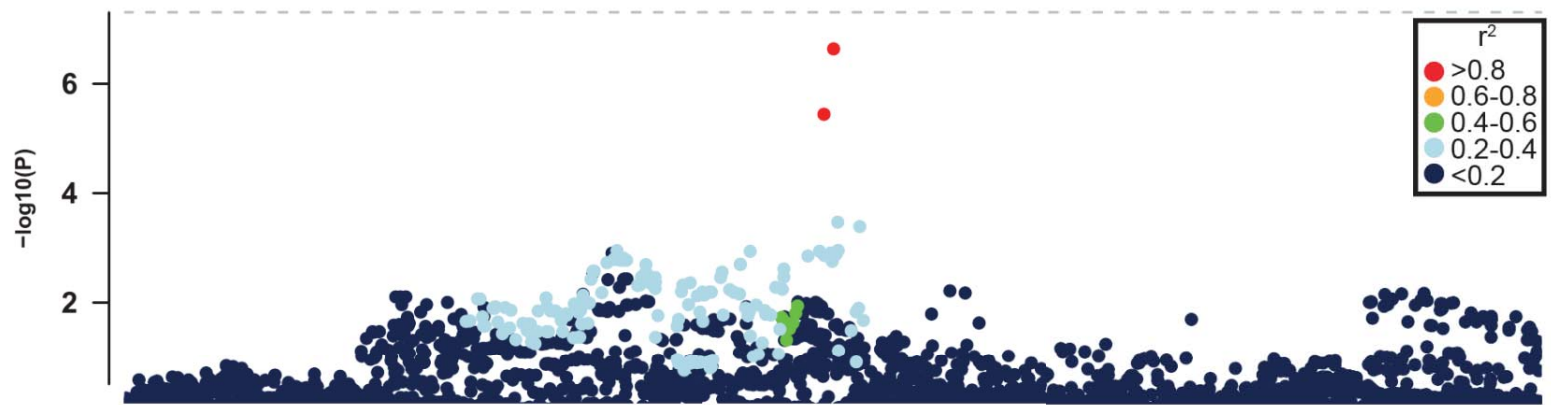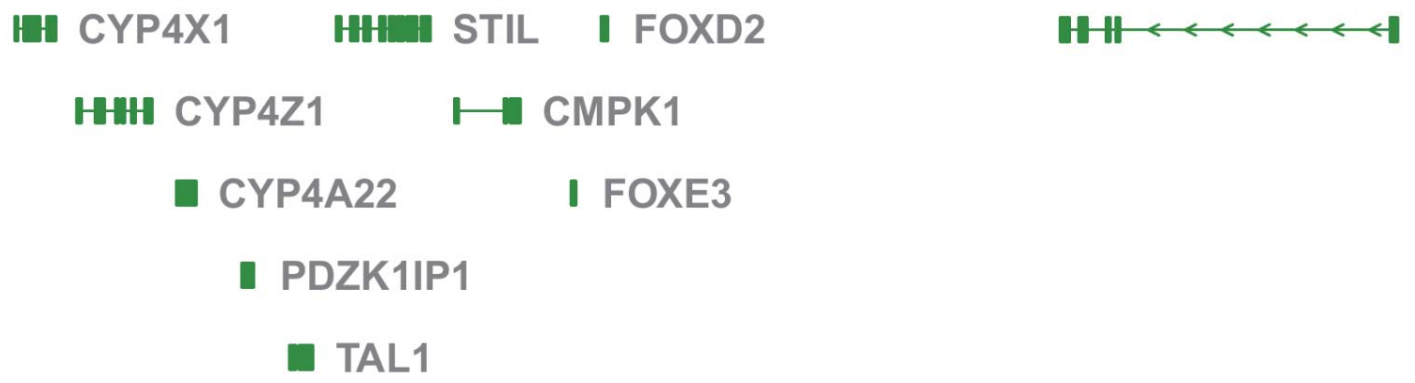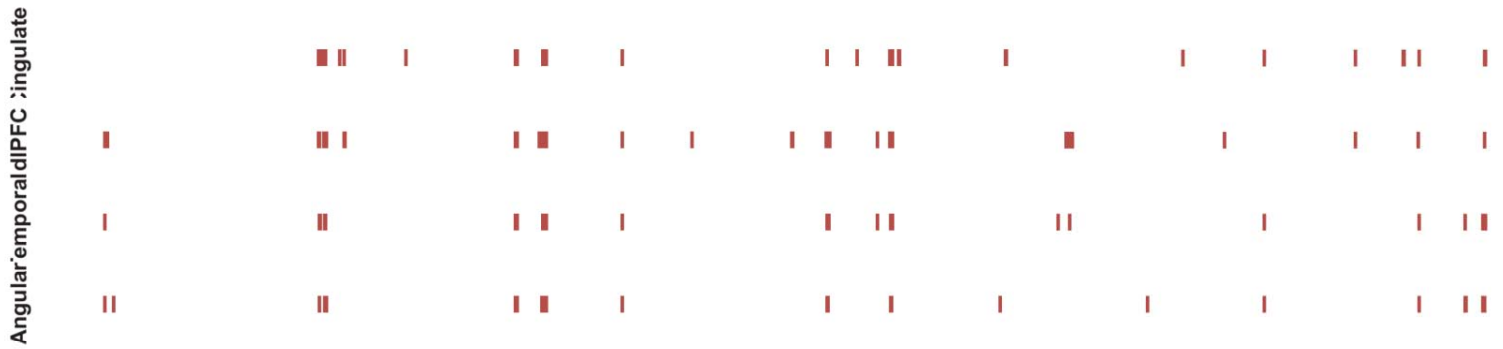

Corrected for average TH

Uncorrected

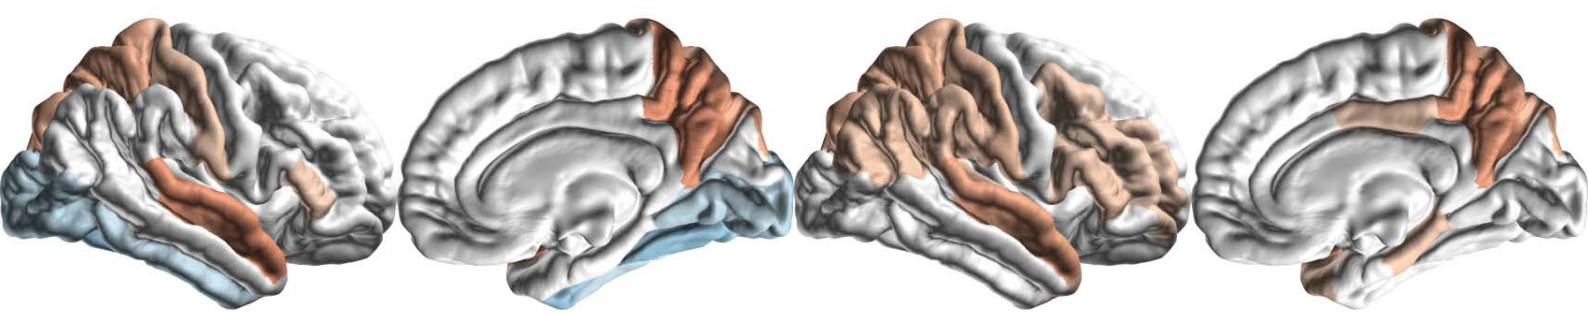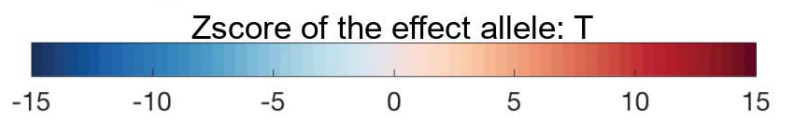

# Superior Temporal TH: rs9848203

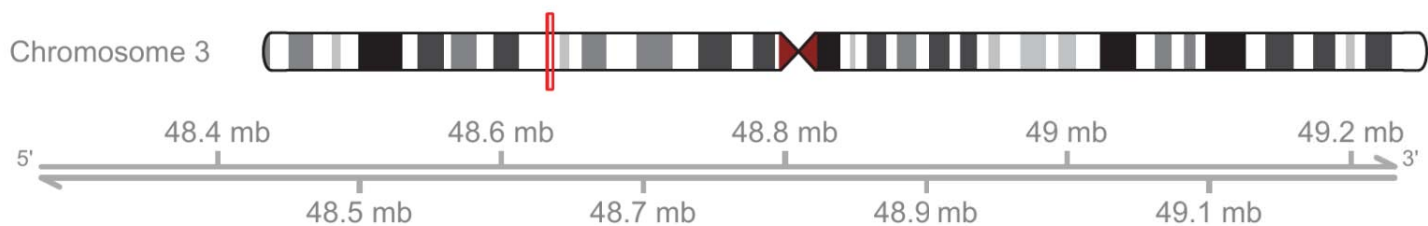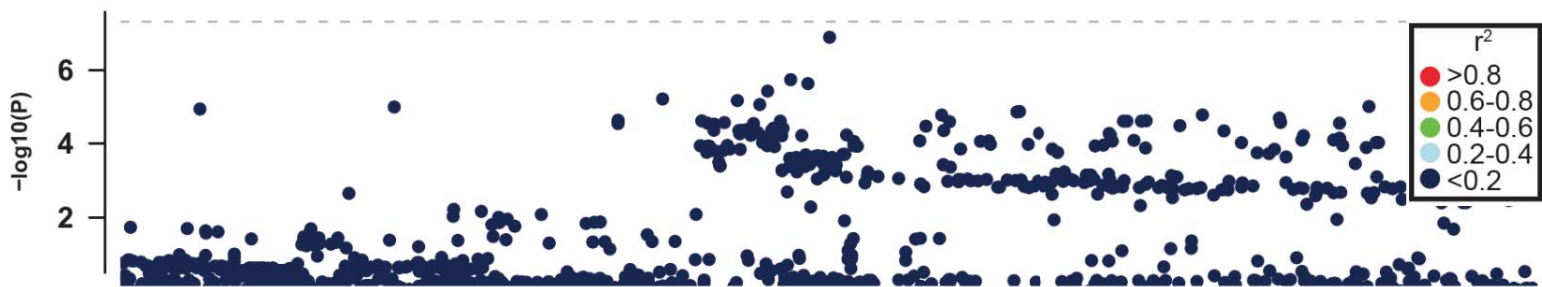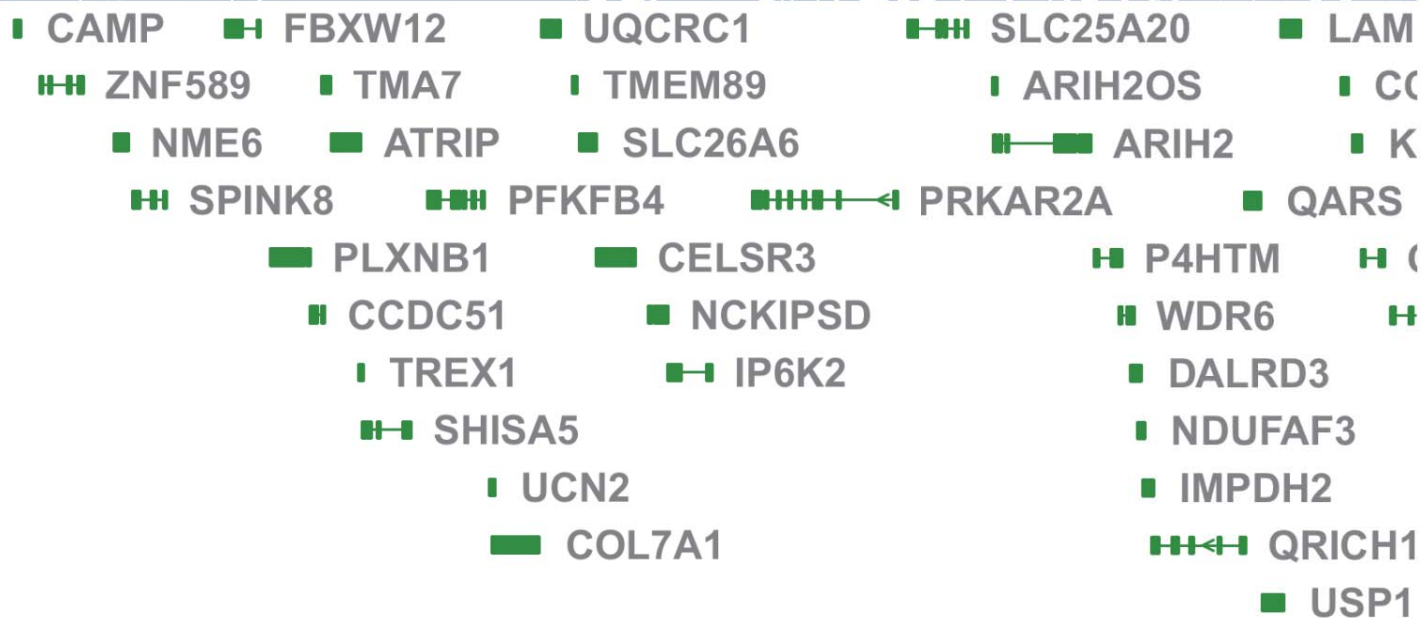

AngulamporziPFNgulate

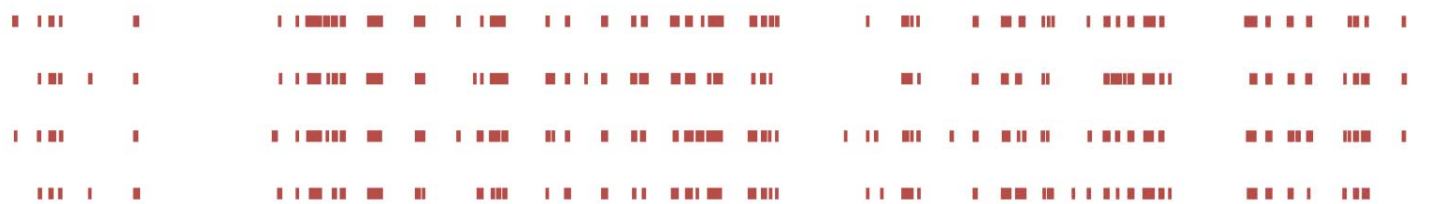

Corrected for average TH

Uncorrected

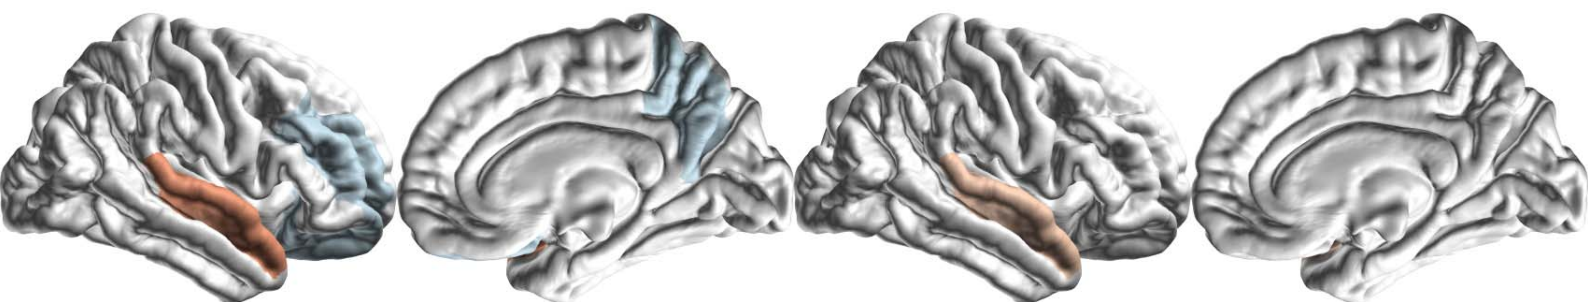

Zscore of the effect allele: T





# Banks of the Superior Temporal Sulcus SA: rs7862092

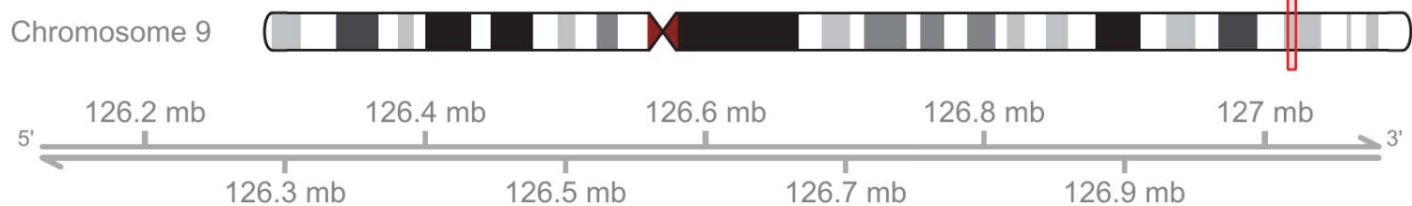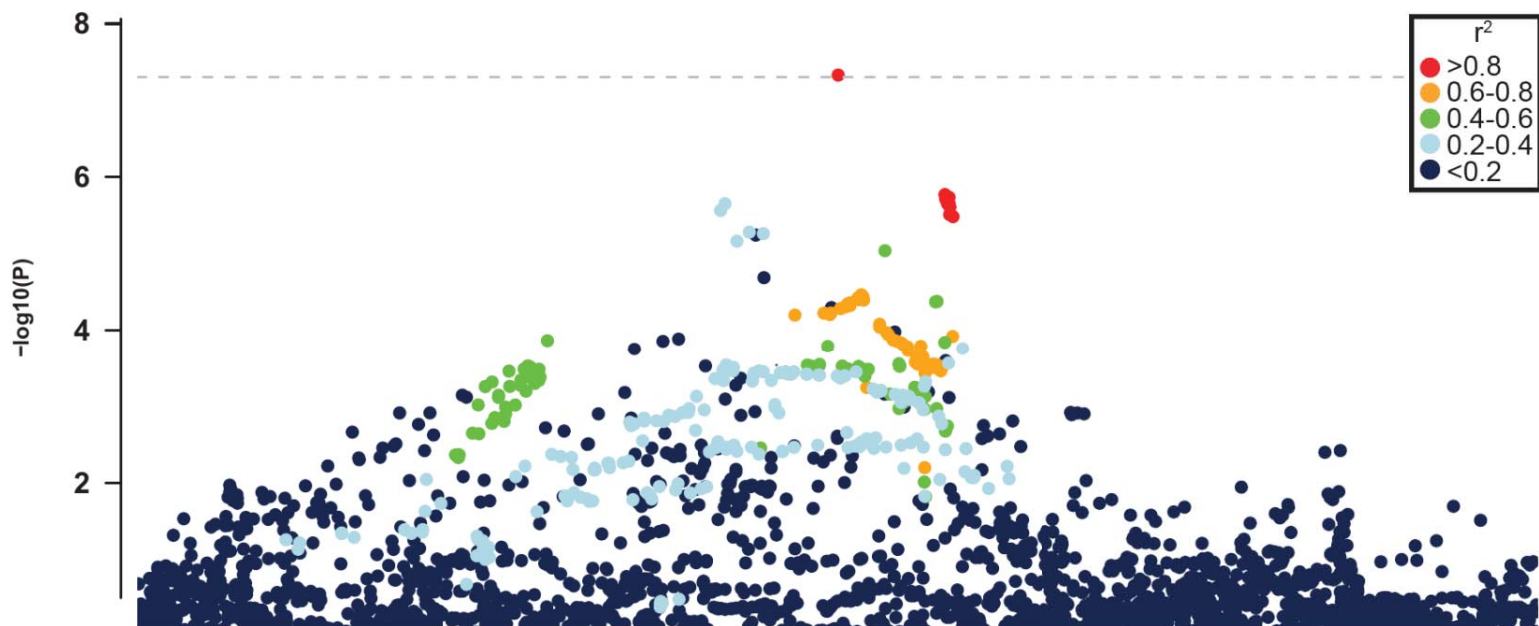

CRB2

LHX2

→

DENND1A

GZ>CP

CP>GZ

Corrected for total SA

Uncorrected

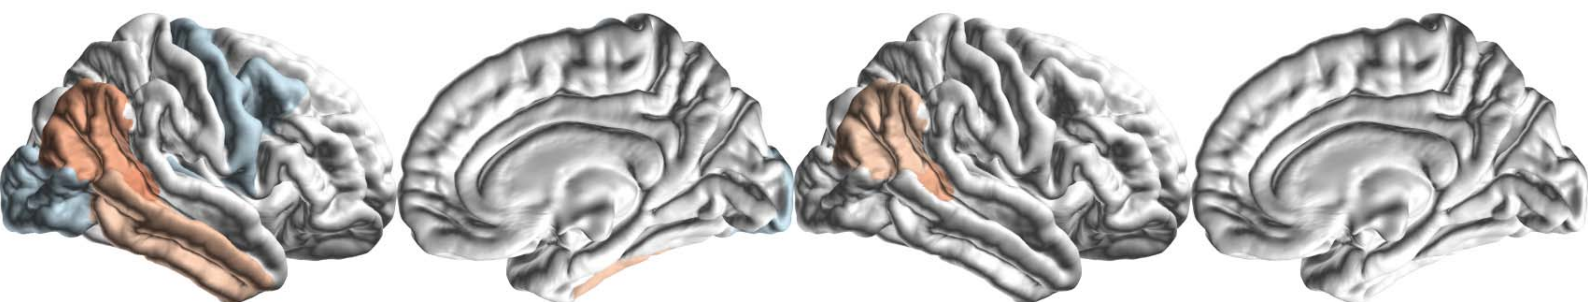

Zscore of the effect allele: T



# Banks of the Superior Temporal Sulcus SA: rs160458

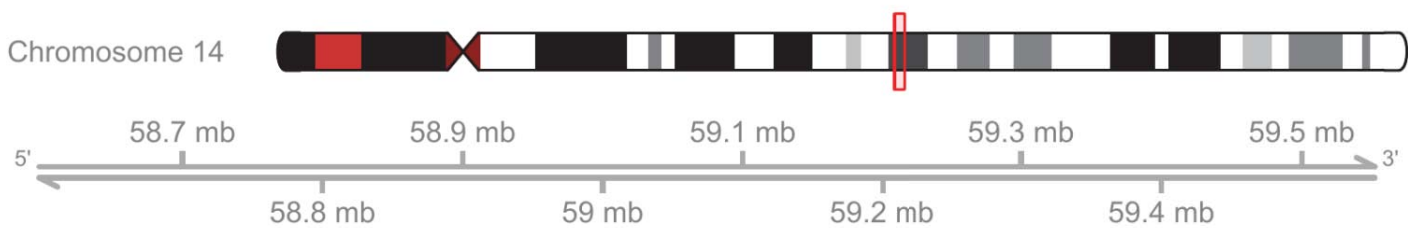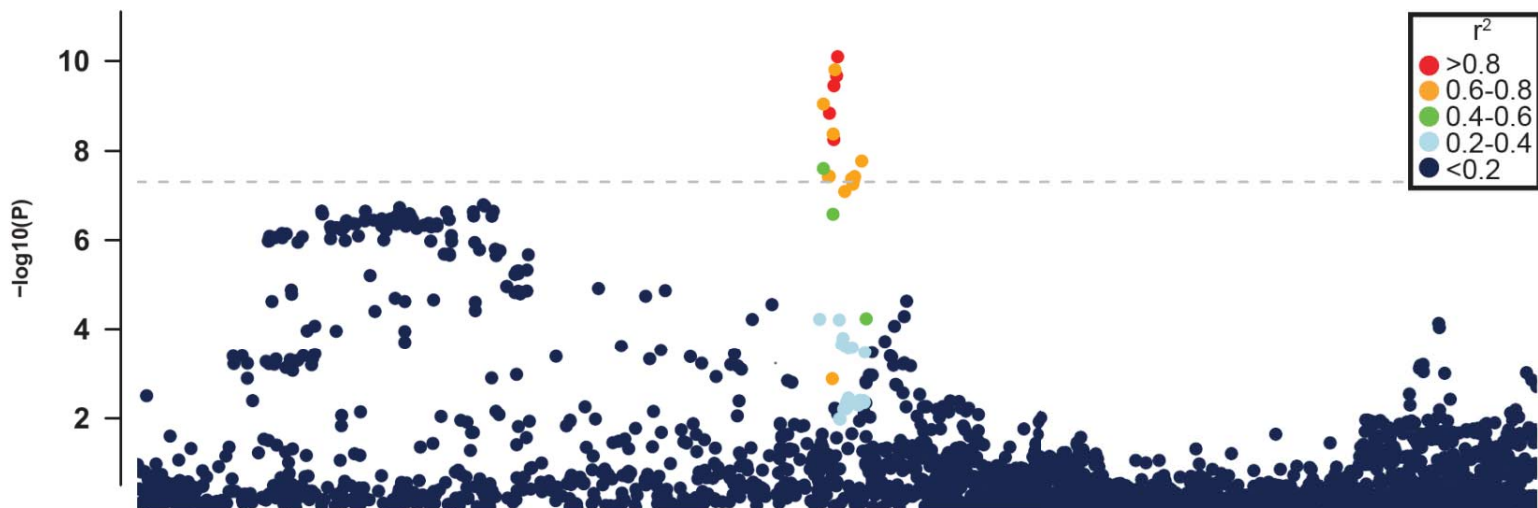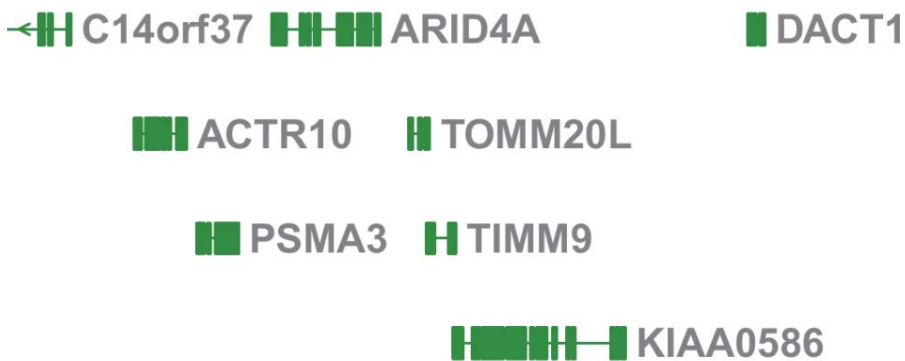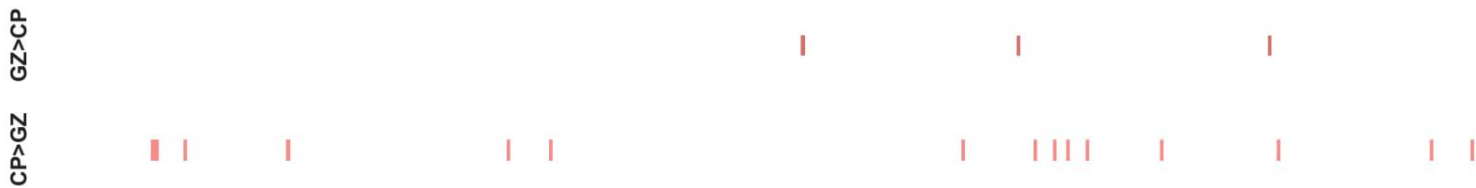

Corrected for total SA

Uncorrected

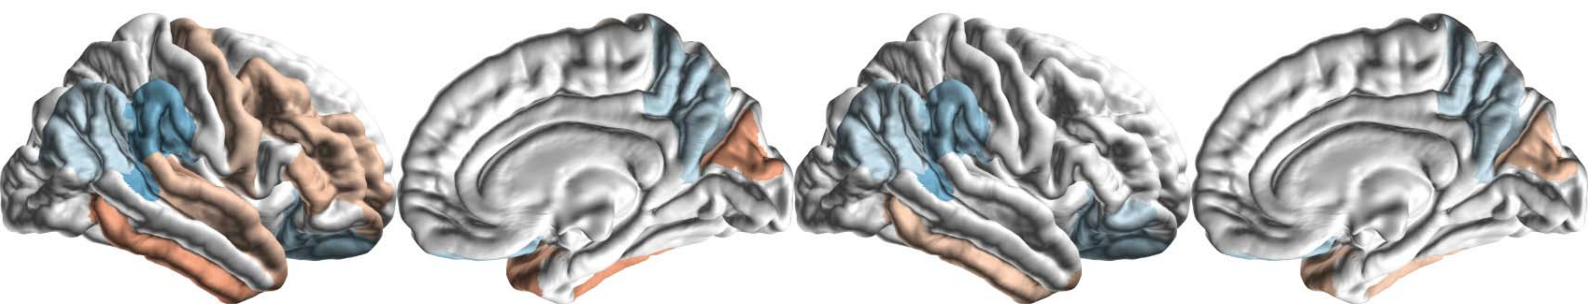

Zscore of the effect allele: T



# Banks of the Superior Temporal Sulcus SA: rs73006822

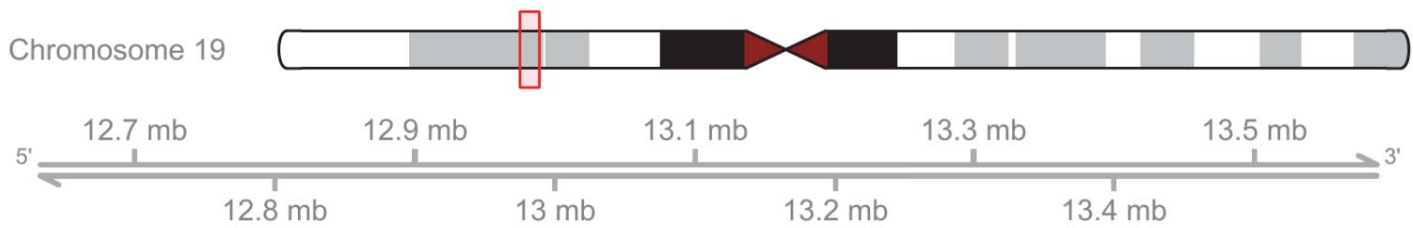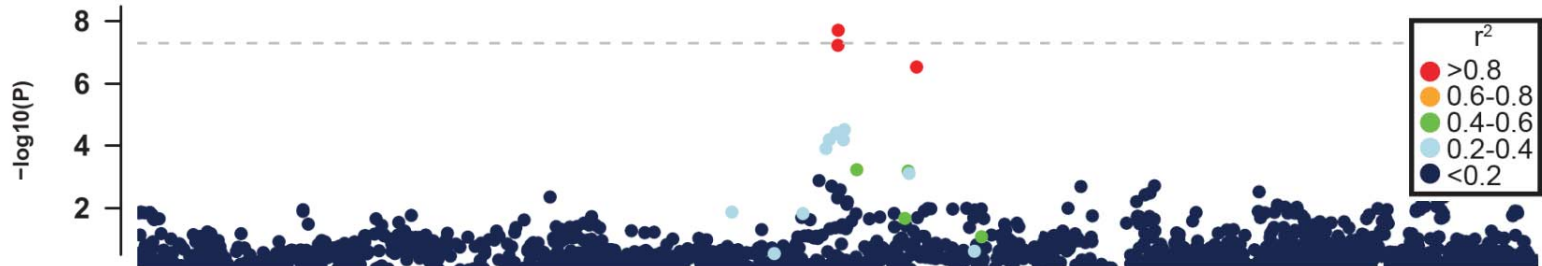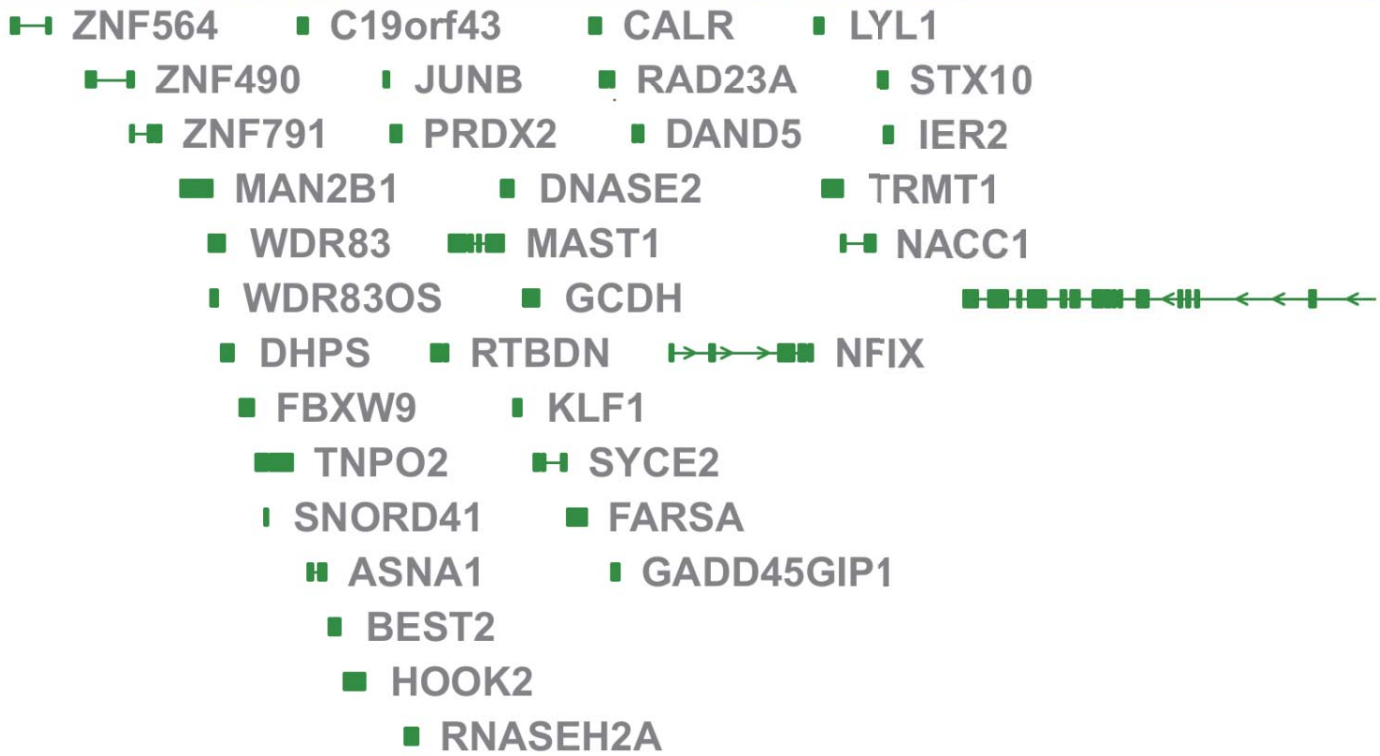

CP>GZZ>CP

Corrected for total SA

Uncorrected

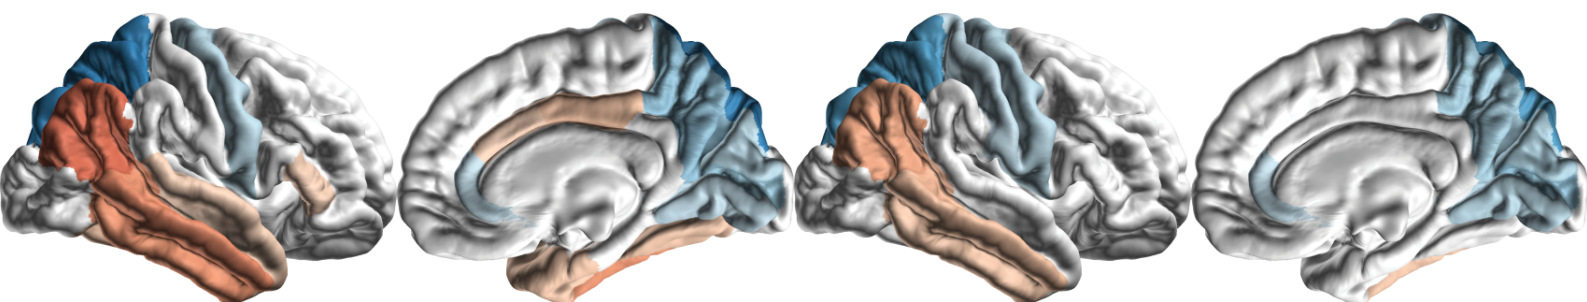

Zscore of the effect allele: T

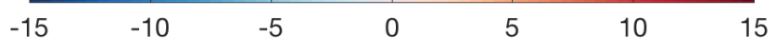



# Banks of the Superior Temporal Sulcus TH: rs149142

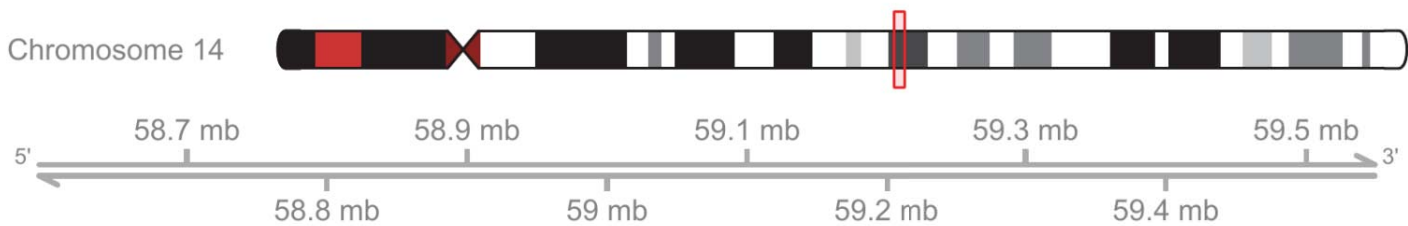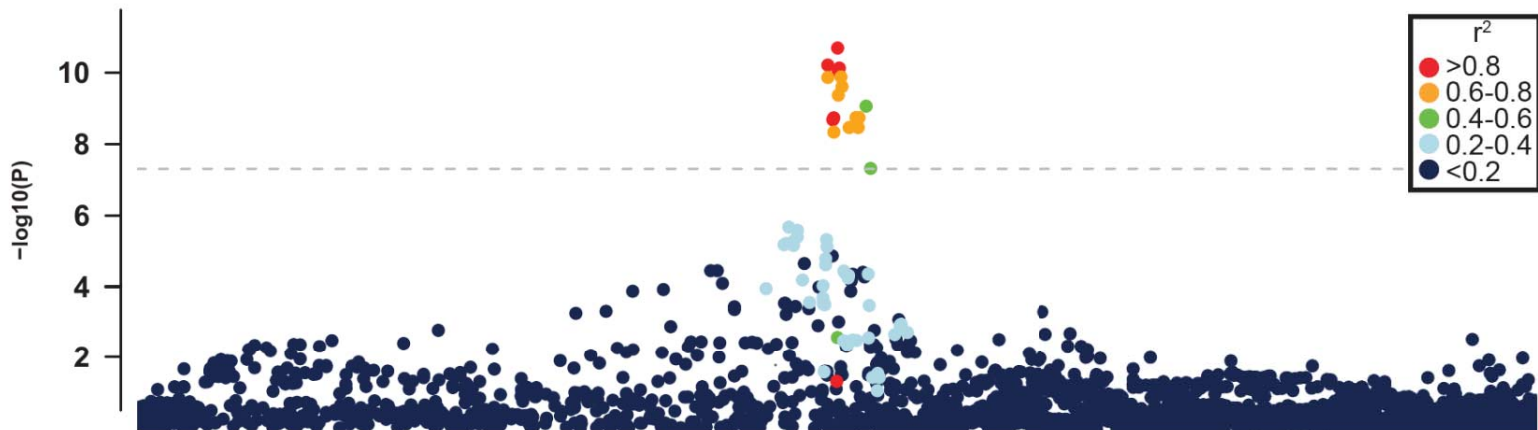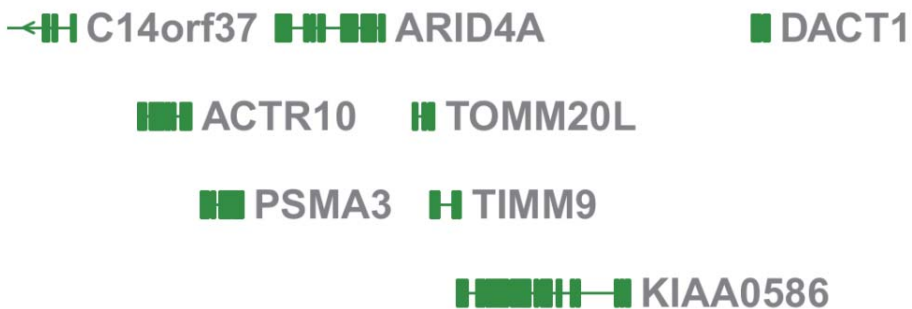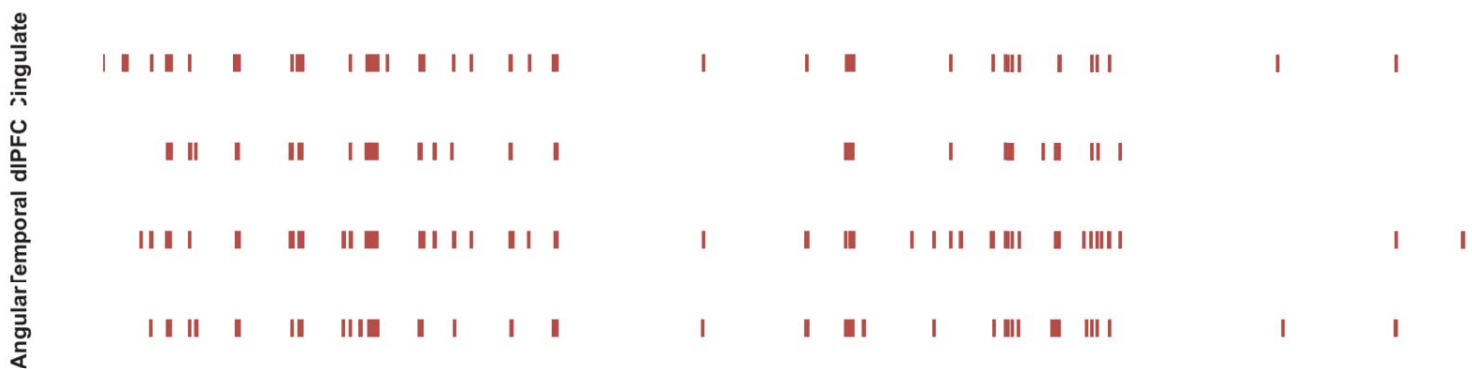

Corrected for average TH

Uncorrected

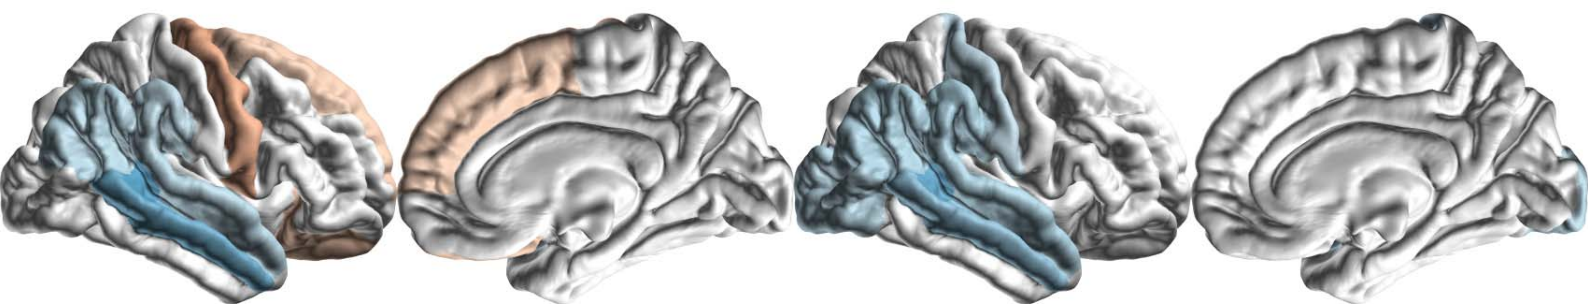

Zscore of the effect allele: T



# Transverse Temporal SA: rs11684511

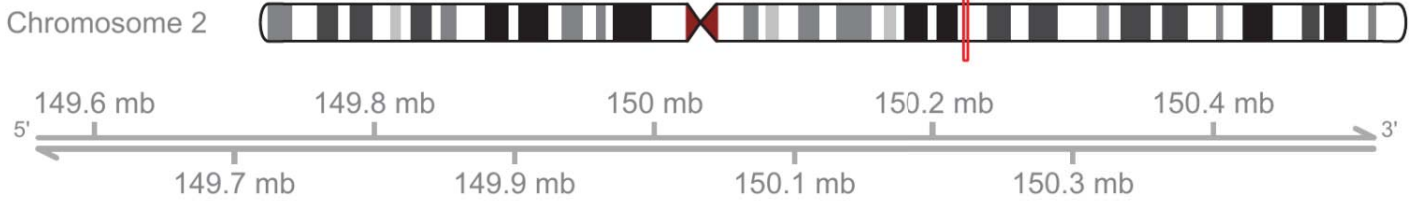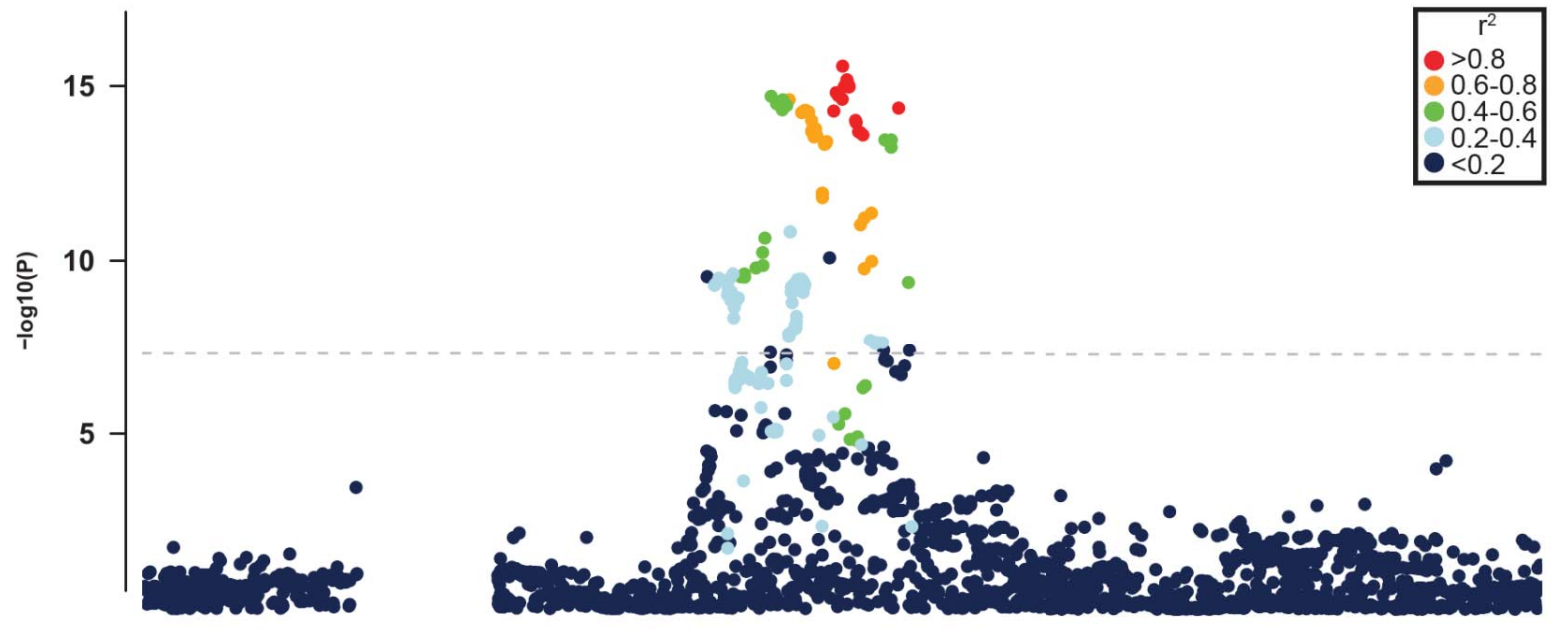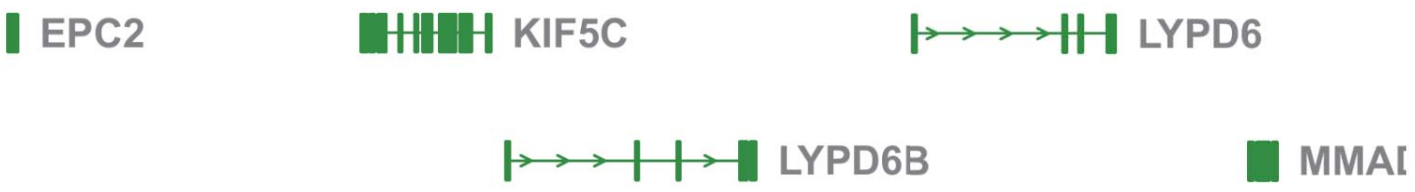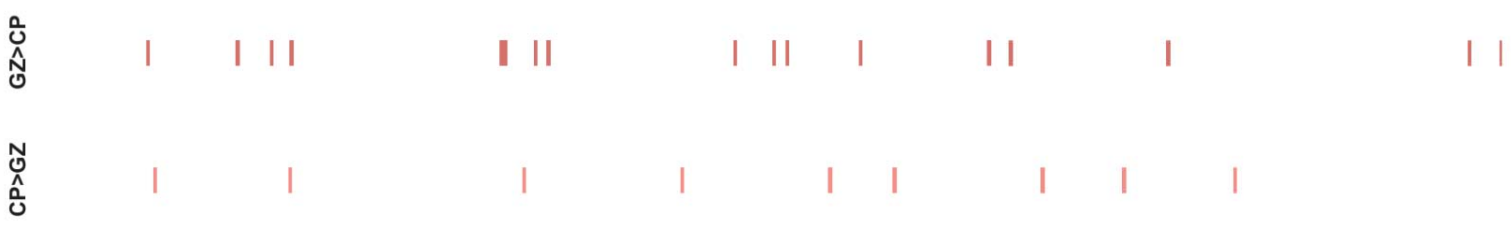

Corrected for total SA

Uncorrected

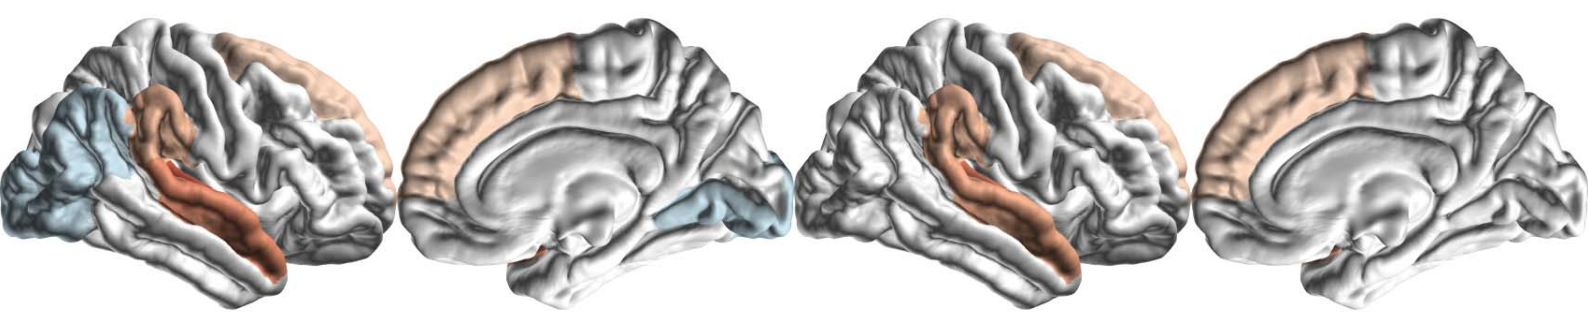

# Transverse Temporal SA: rs115840240

Chromosome 5

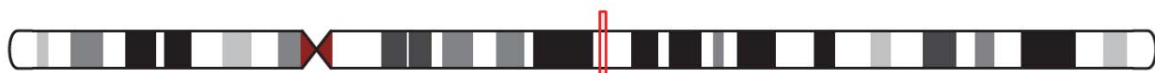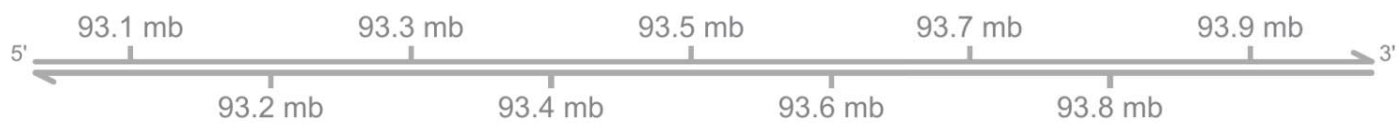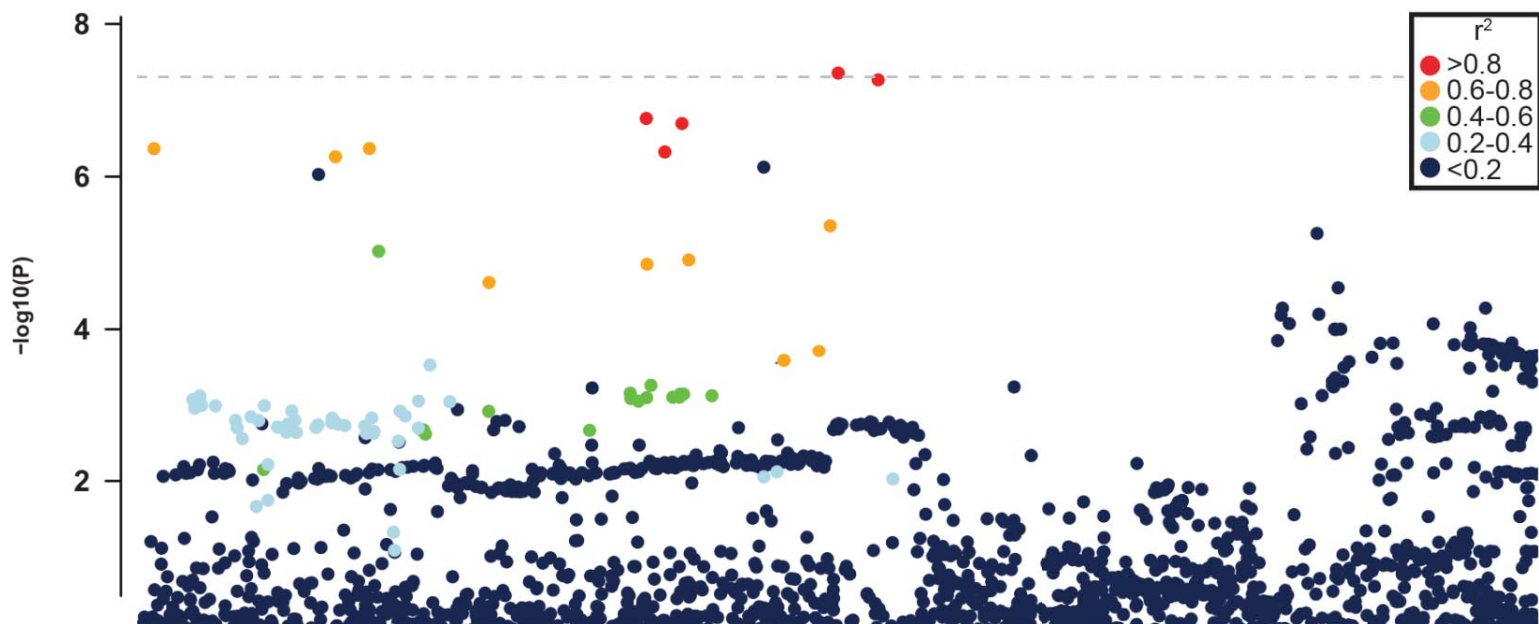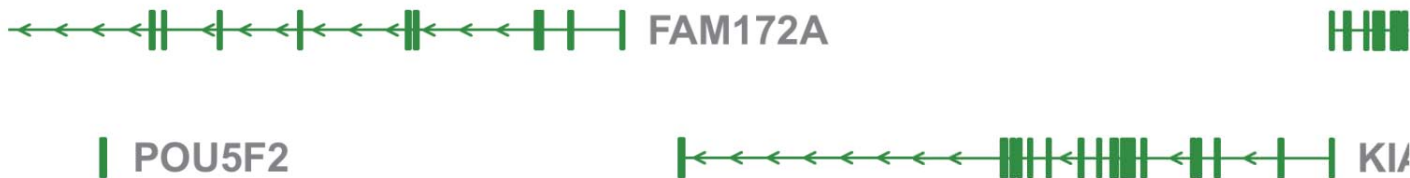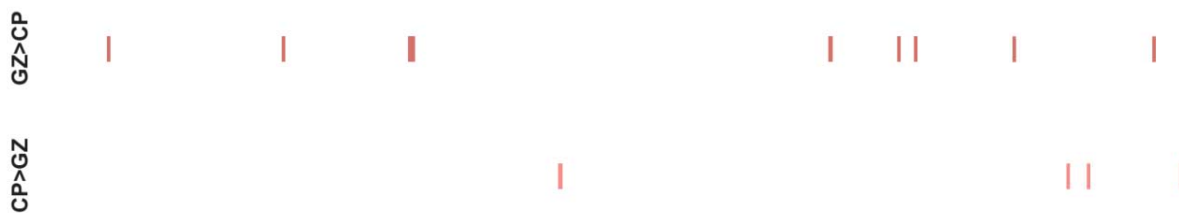

Corrected for total SA

Uncorrected

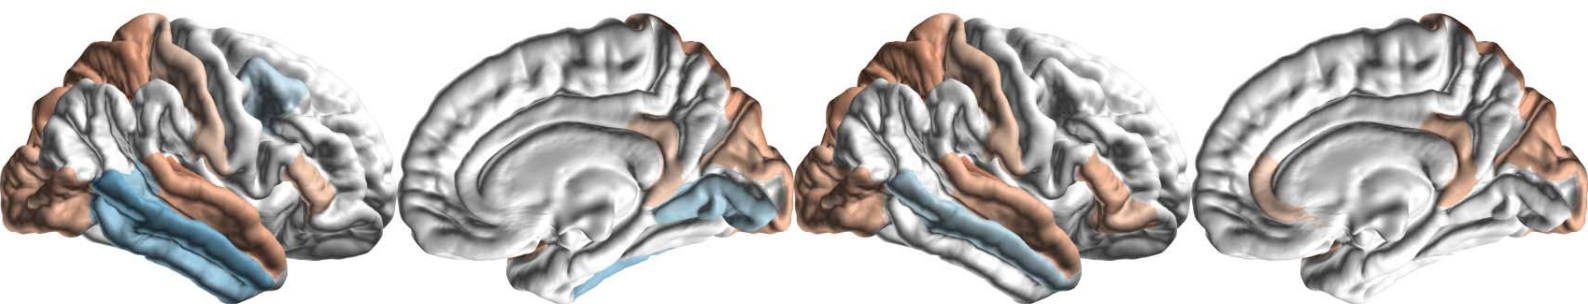

Zscore of the effect allele: A





# Transverse Temporal SA: rs7714191

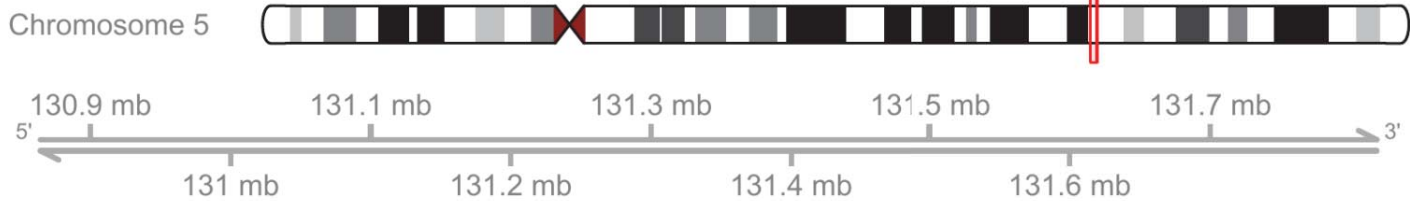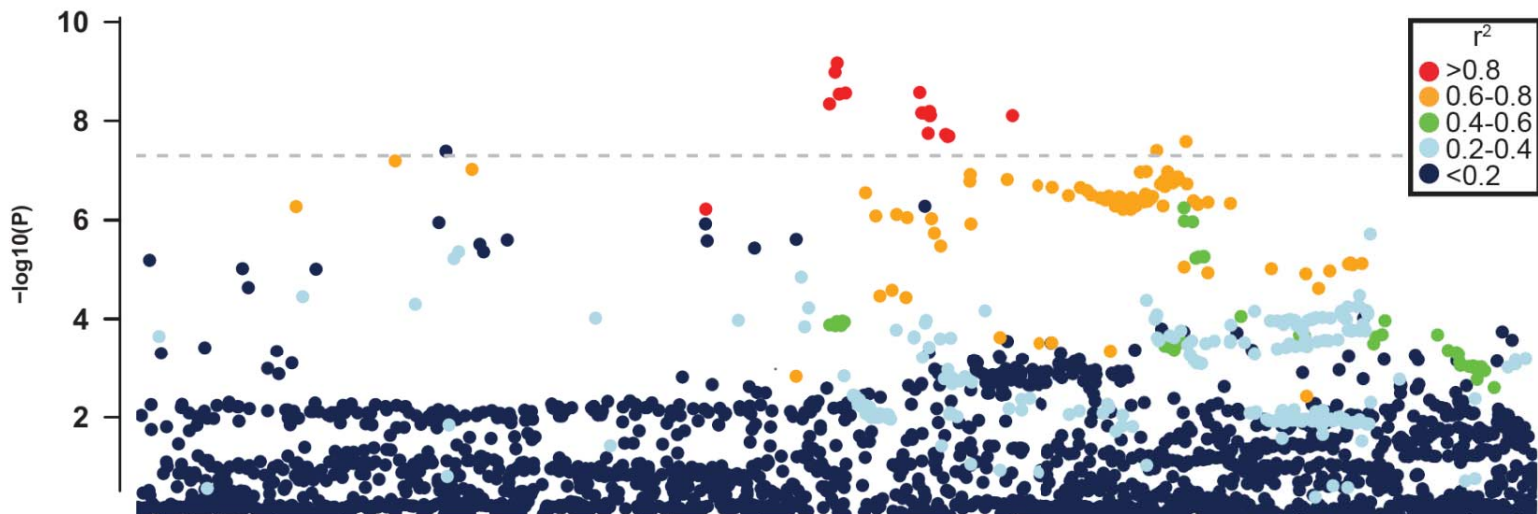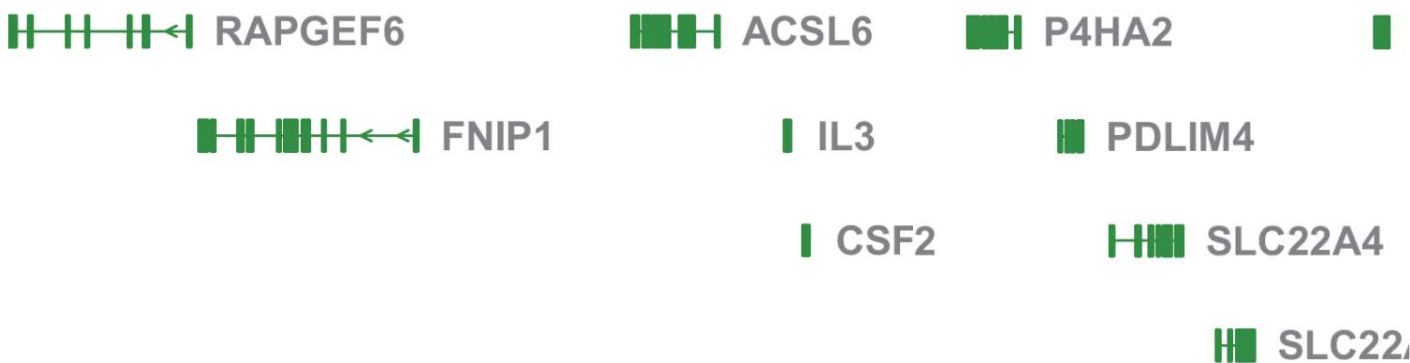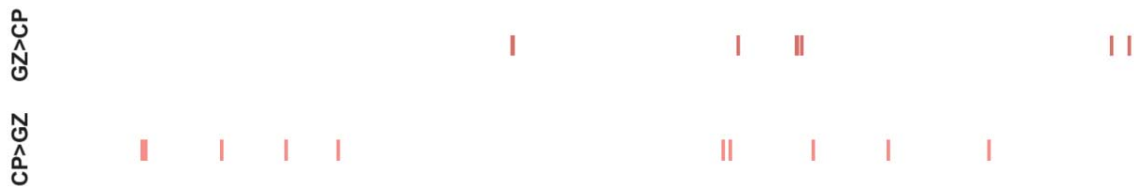

Corrected for total SA

Uncorrected

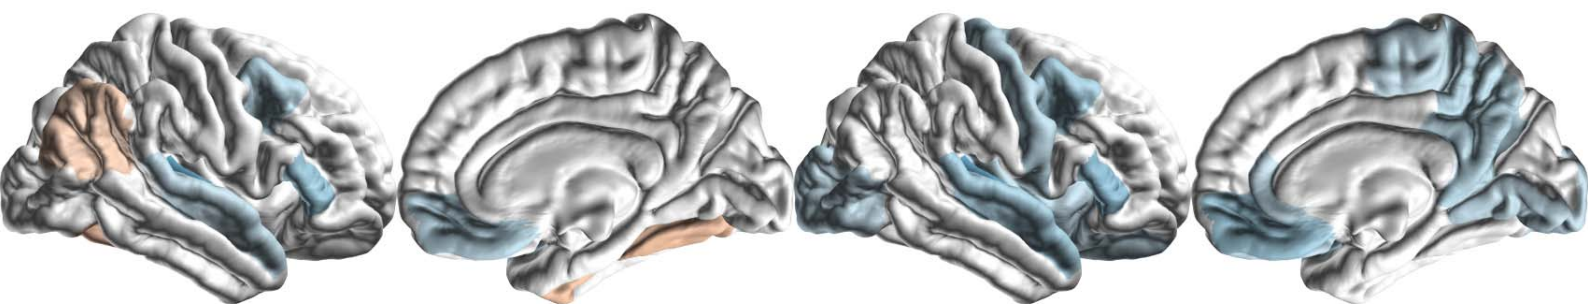

Zscore of the effect allele: C

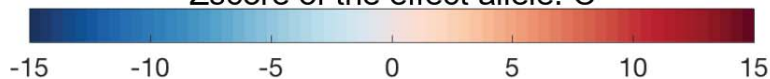

# Transverse Temporal SA: rs72834200

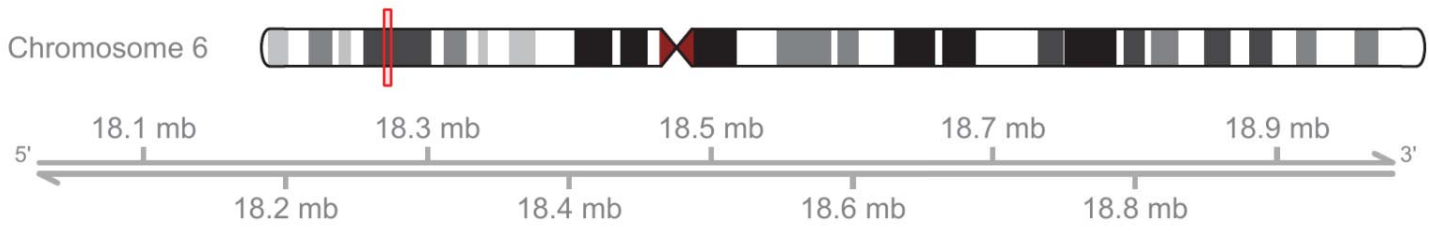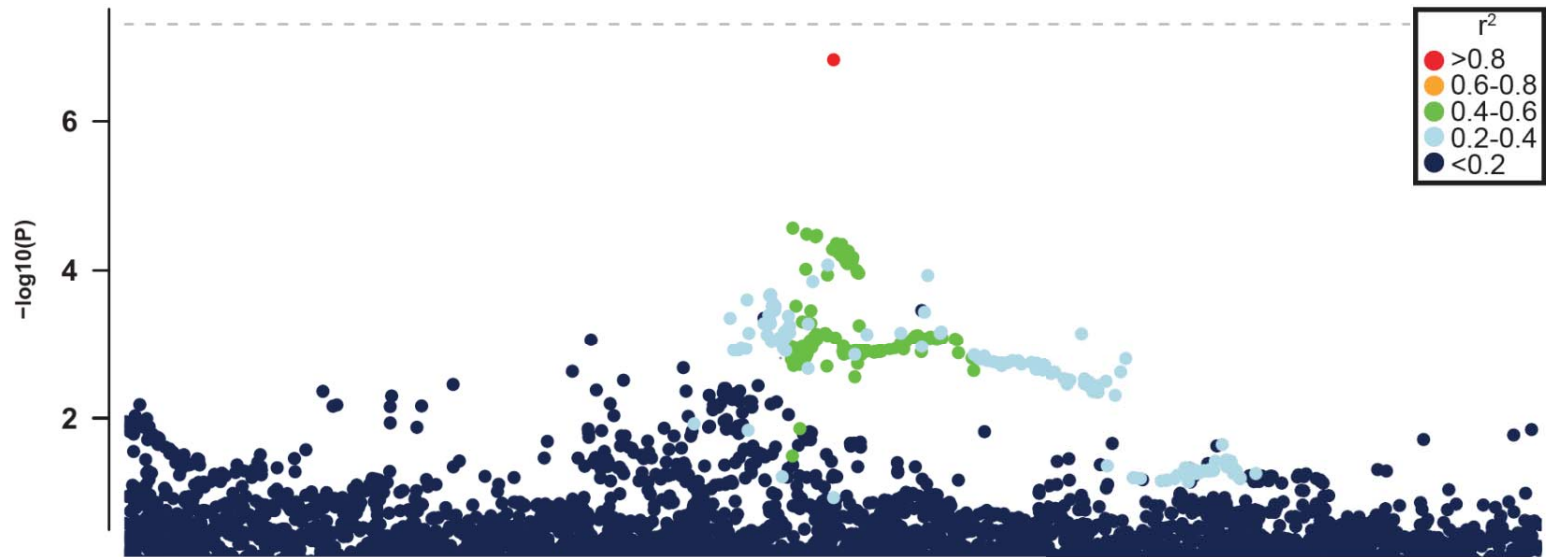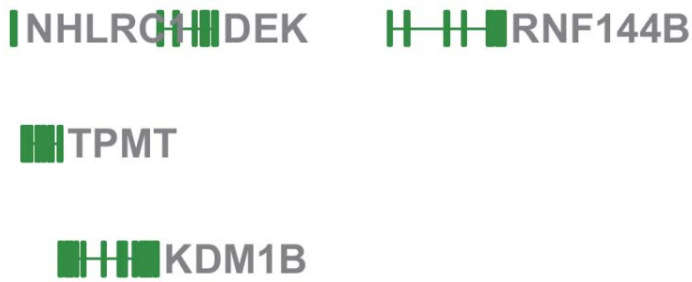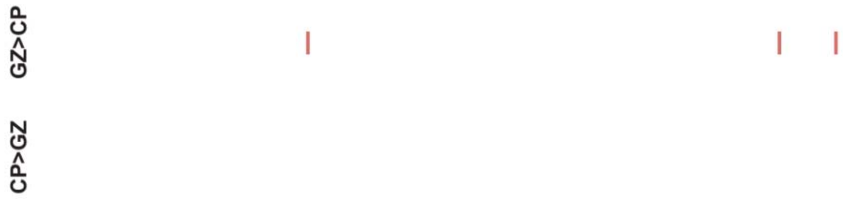

Corrected for total SA

Uncorrected

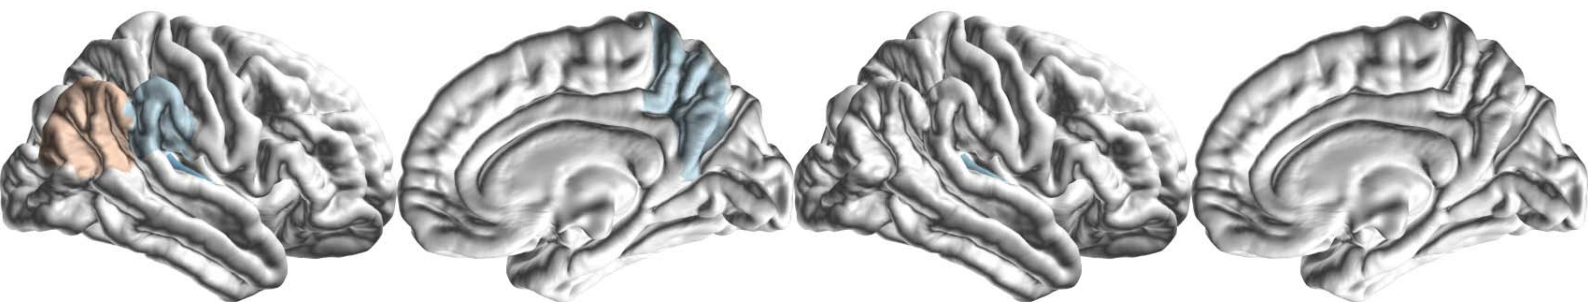

# Transverse Temporal SA: rs4706391

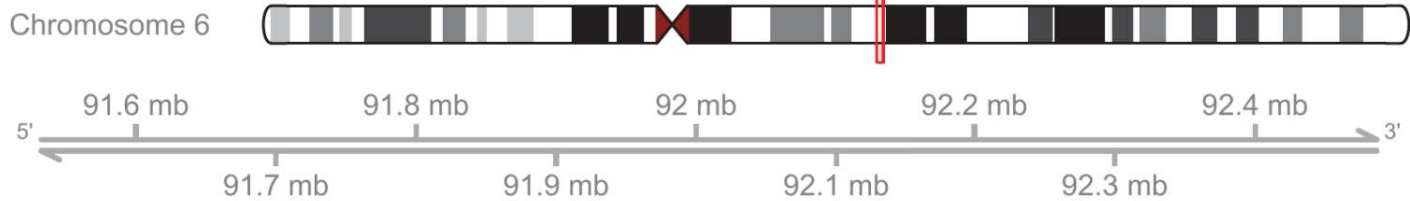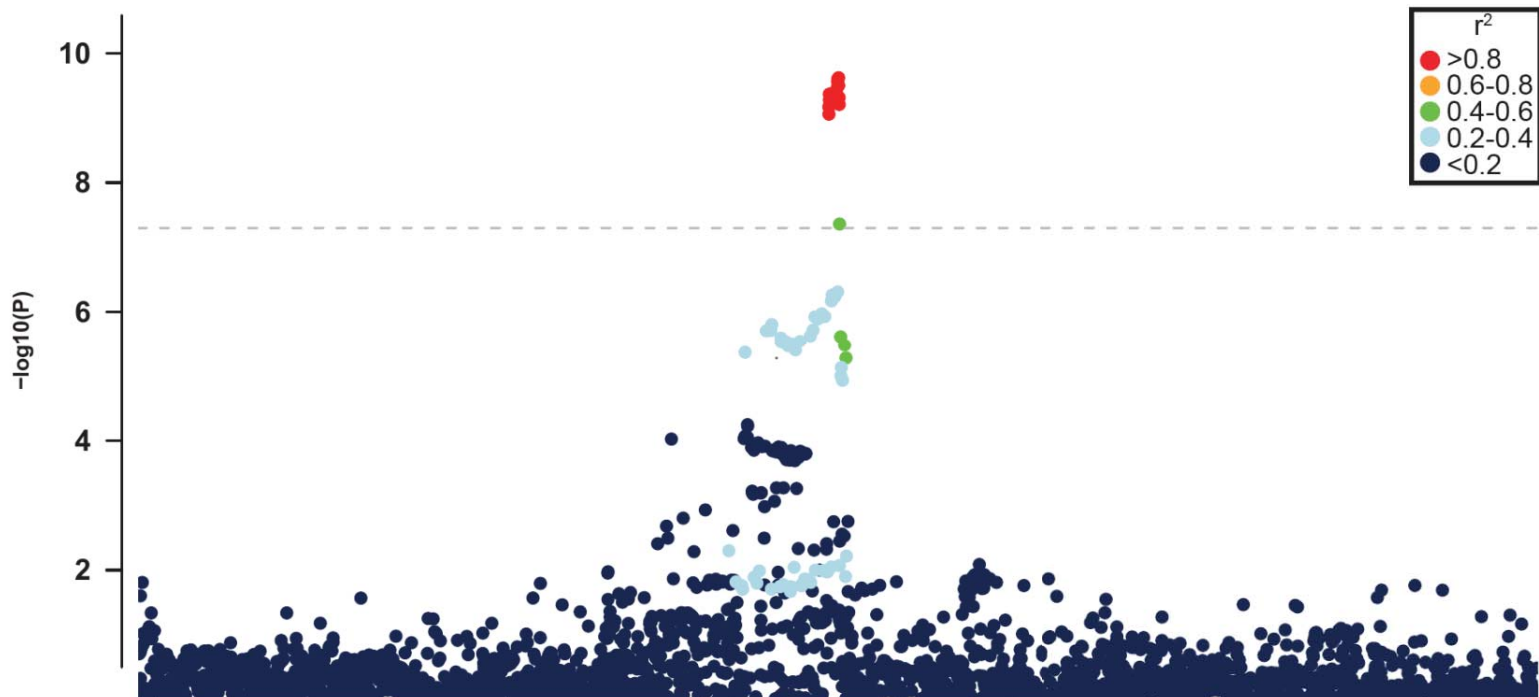

GZ>CP

CP>GZ

Corrected for total SA

Uncorrected

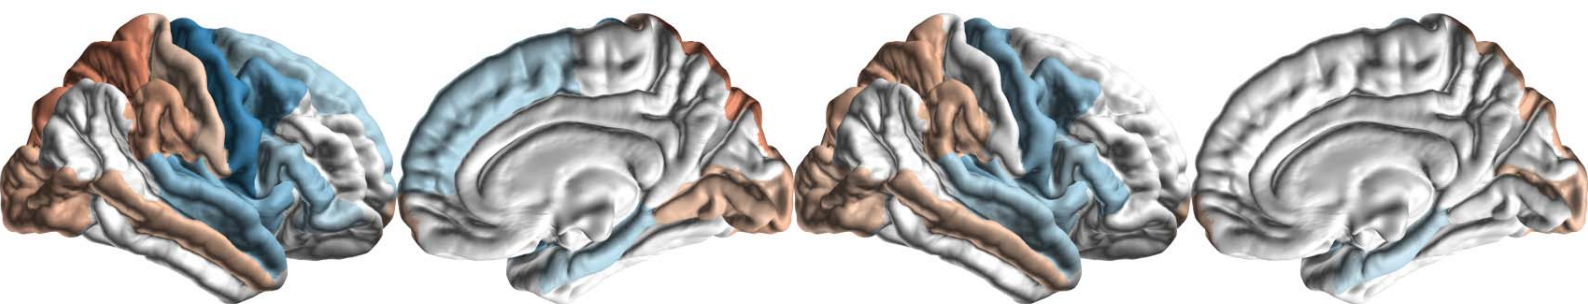



## Transverse Temporal SA: rs2409691

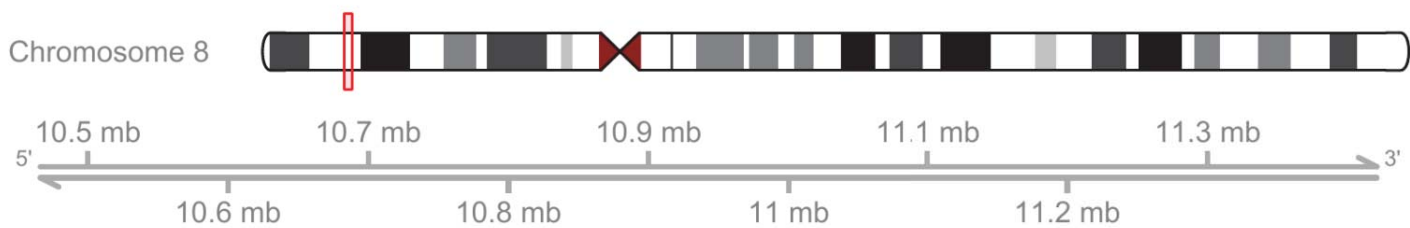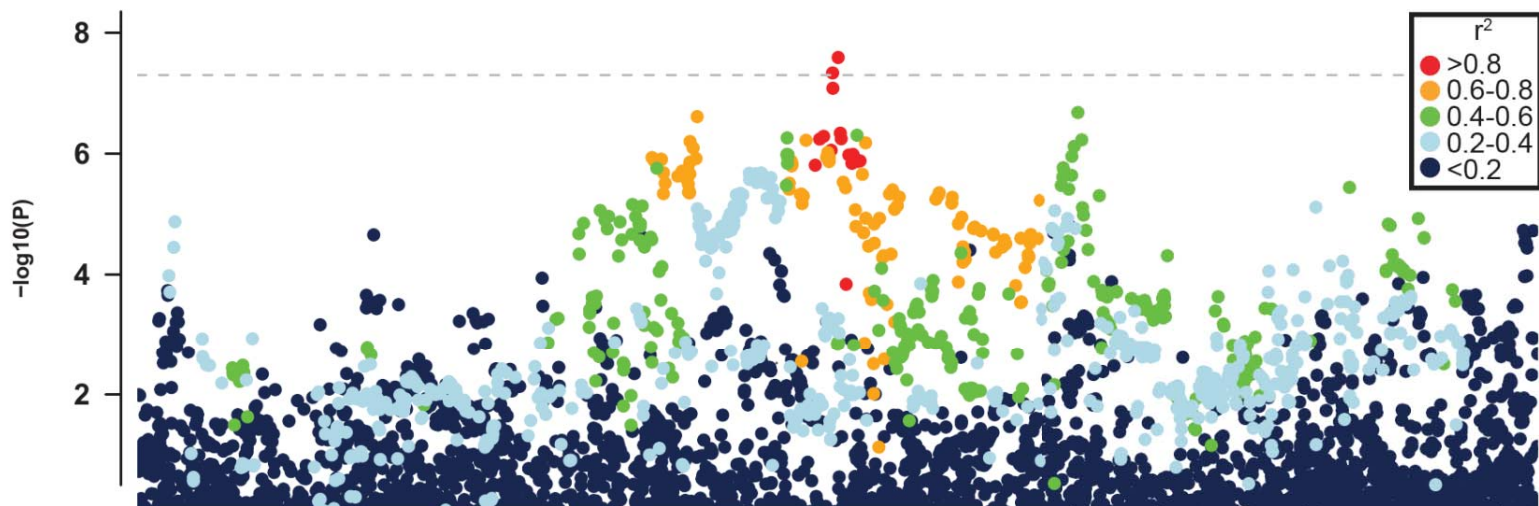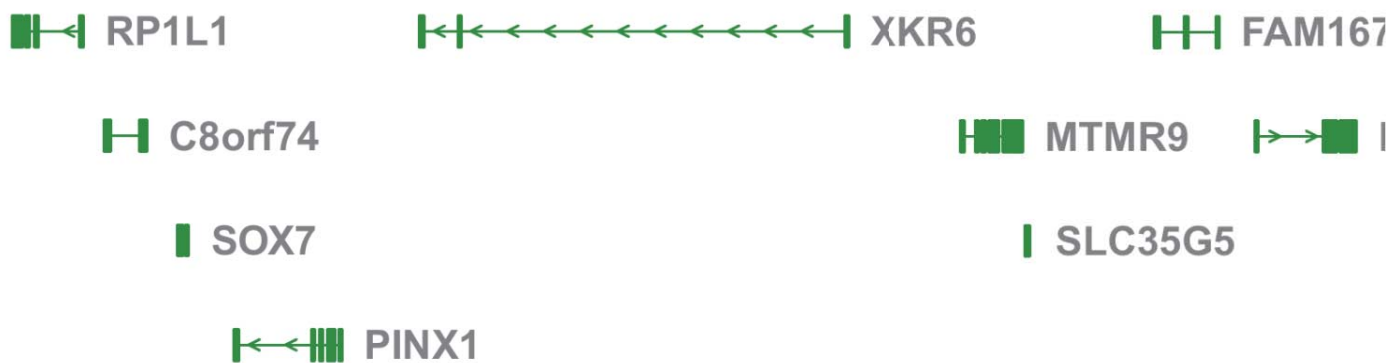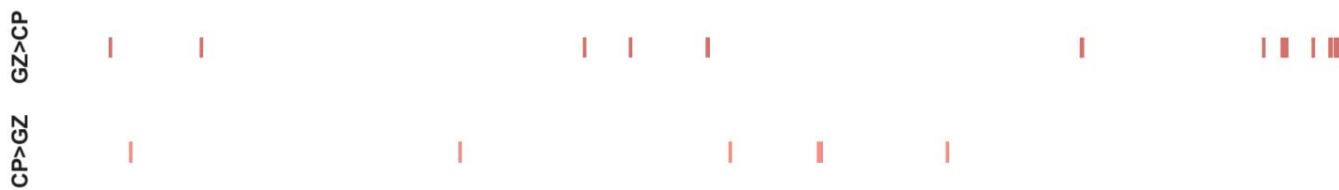

Corrected for total SA

Uncorrected

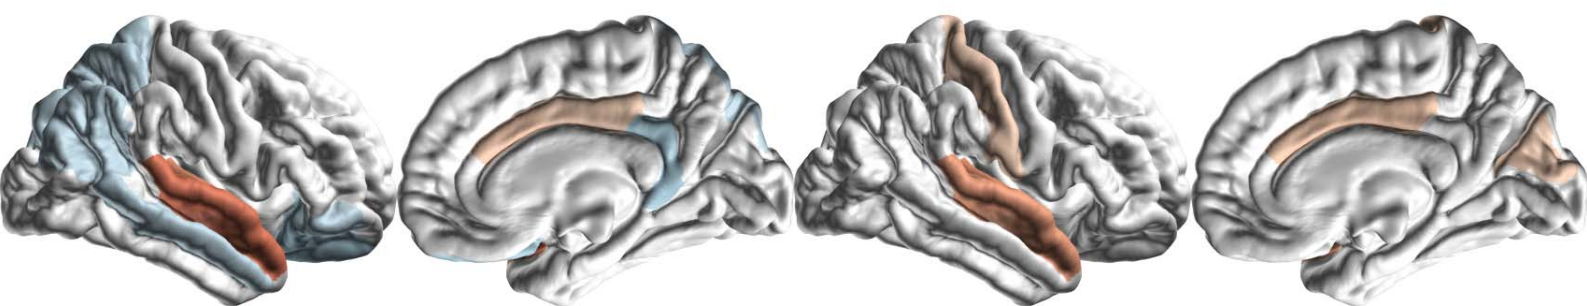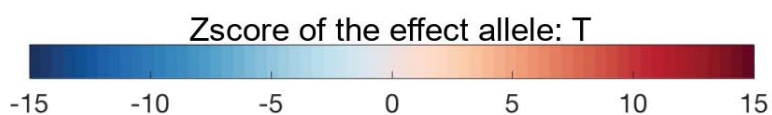

# Transverse Temporal SA: rs4923822

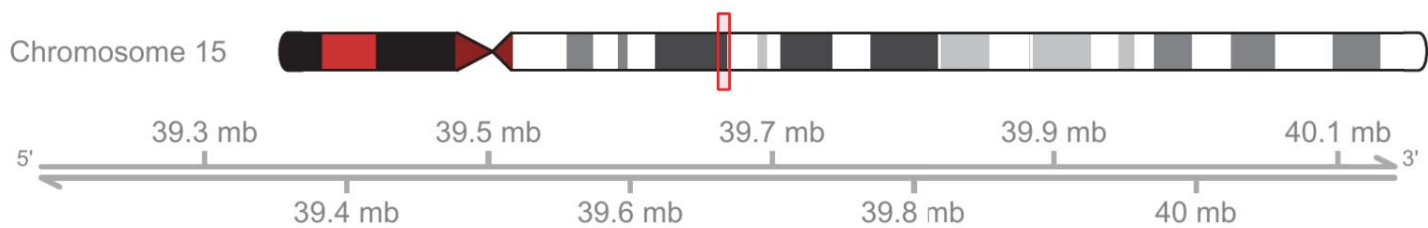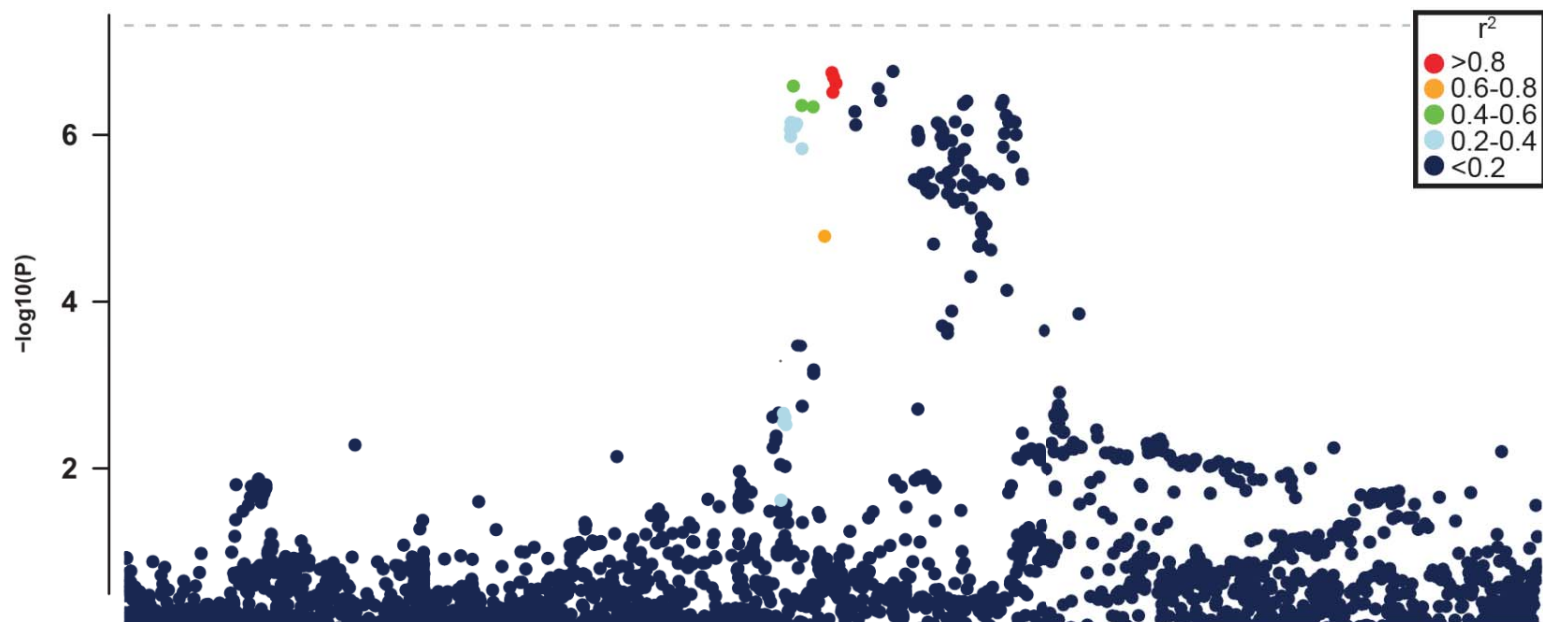

C15orf54

THBS1

FSIP1

GZ>CP

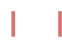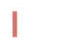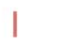

CP>GZ

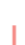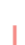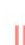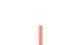

Corrected for total SA

Uncorrected

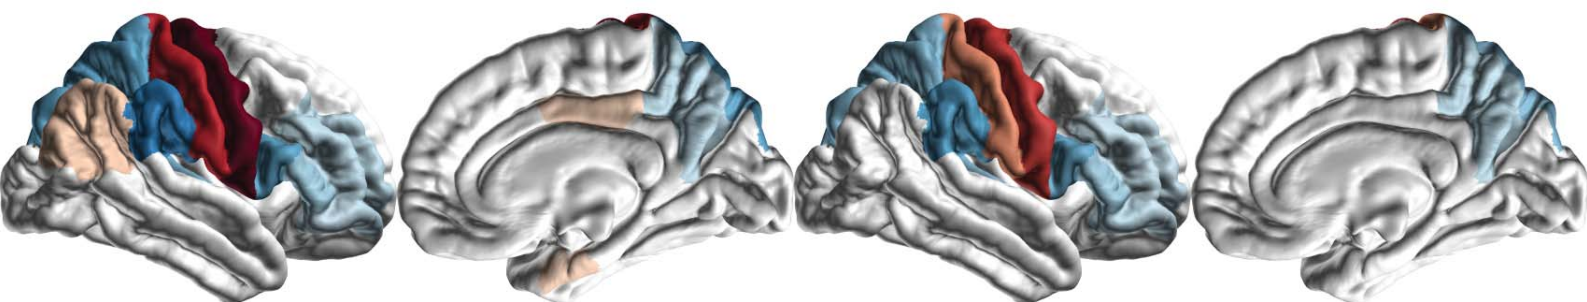

Zscore of the effect allele: A



# Transverse Temporal SA: rs9615351

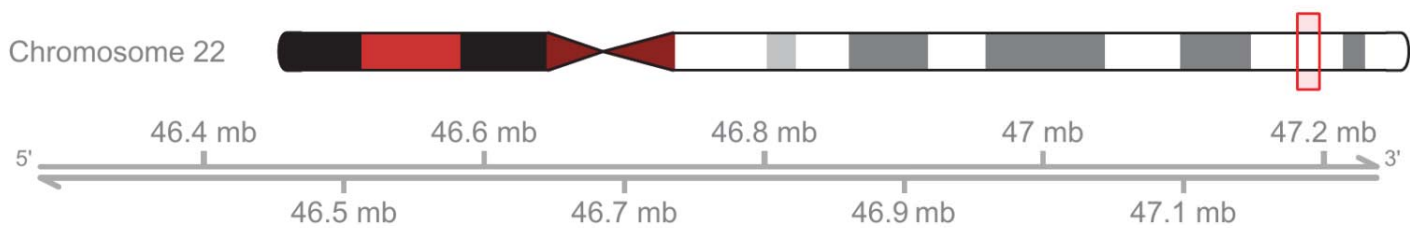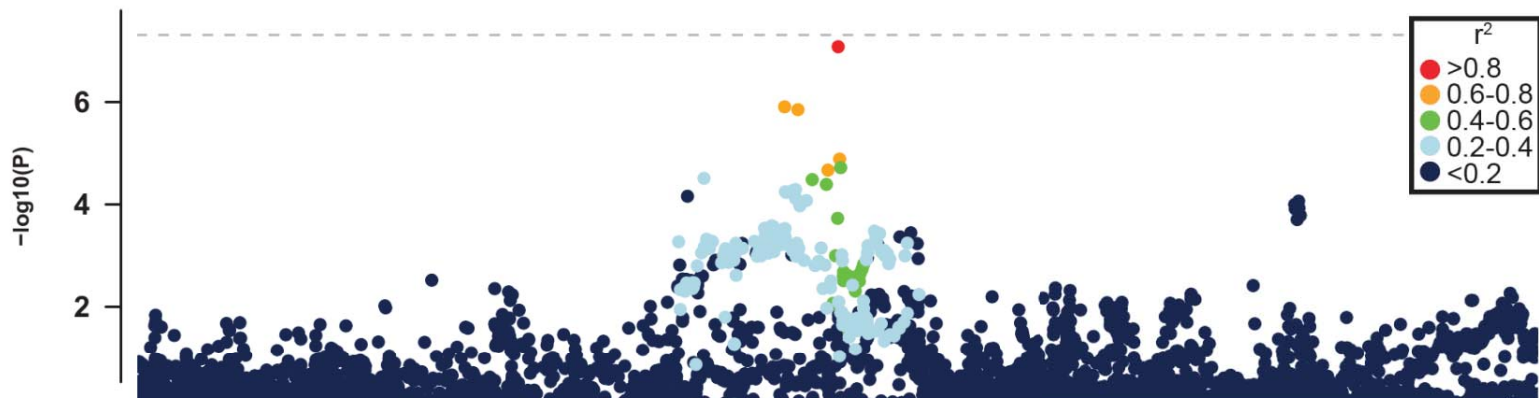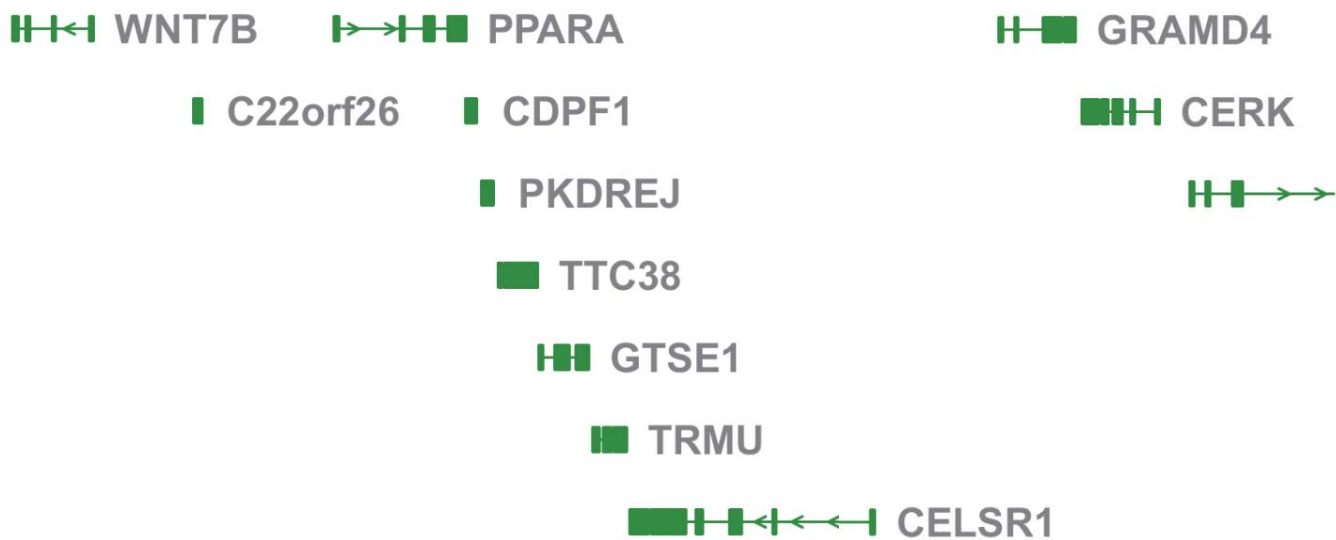

CP>GZ GZ>CP

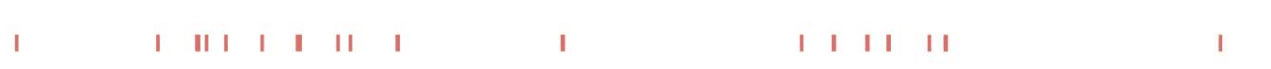

Corrected for total SA

Uncorrected

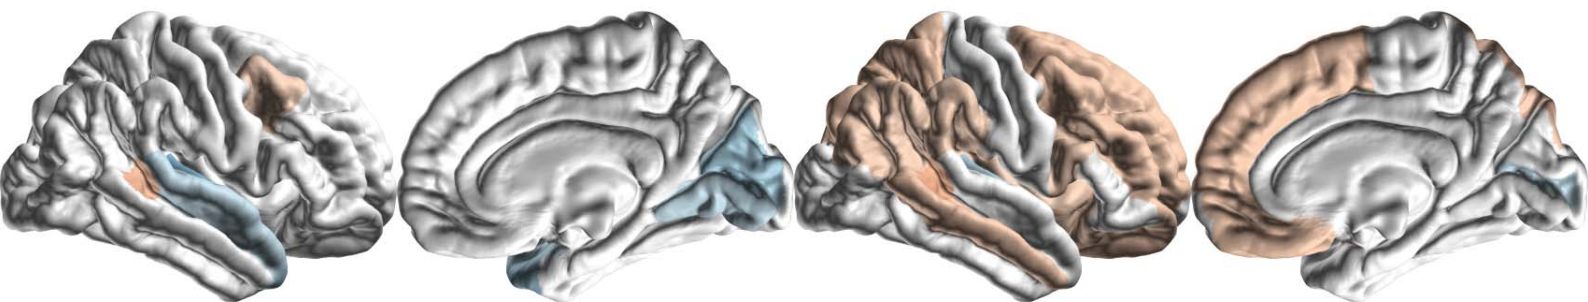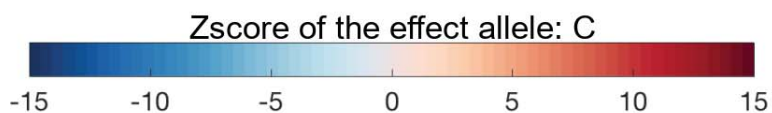



# Transverse Temporal TH: rs57125540

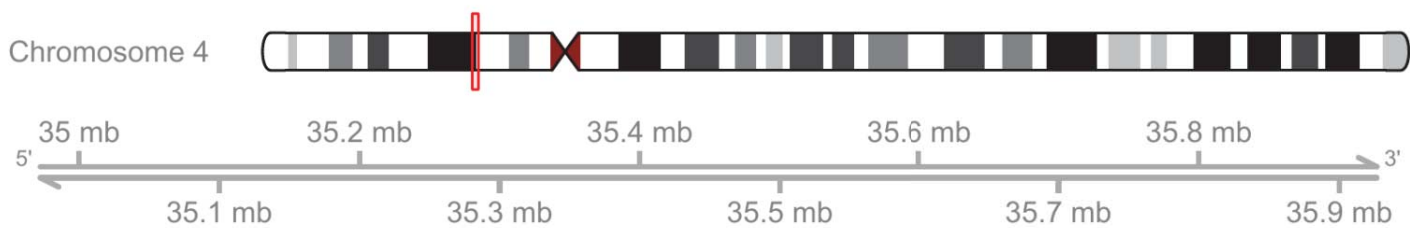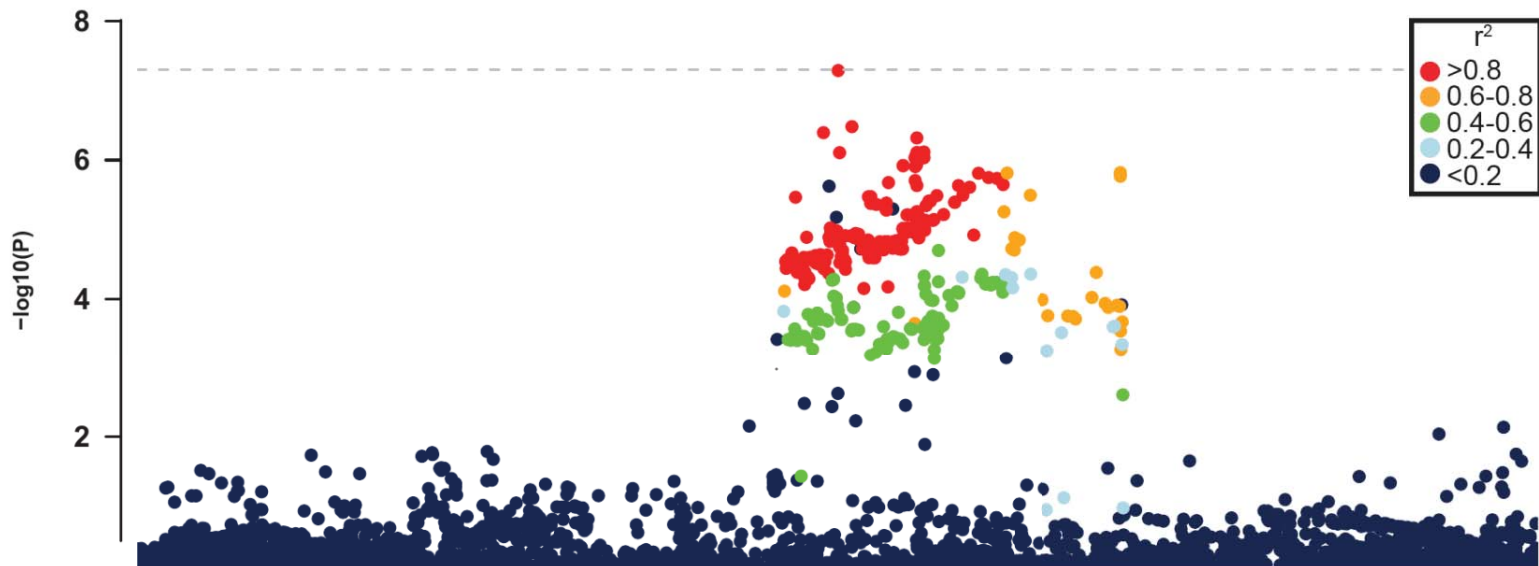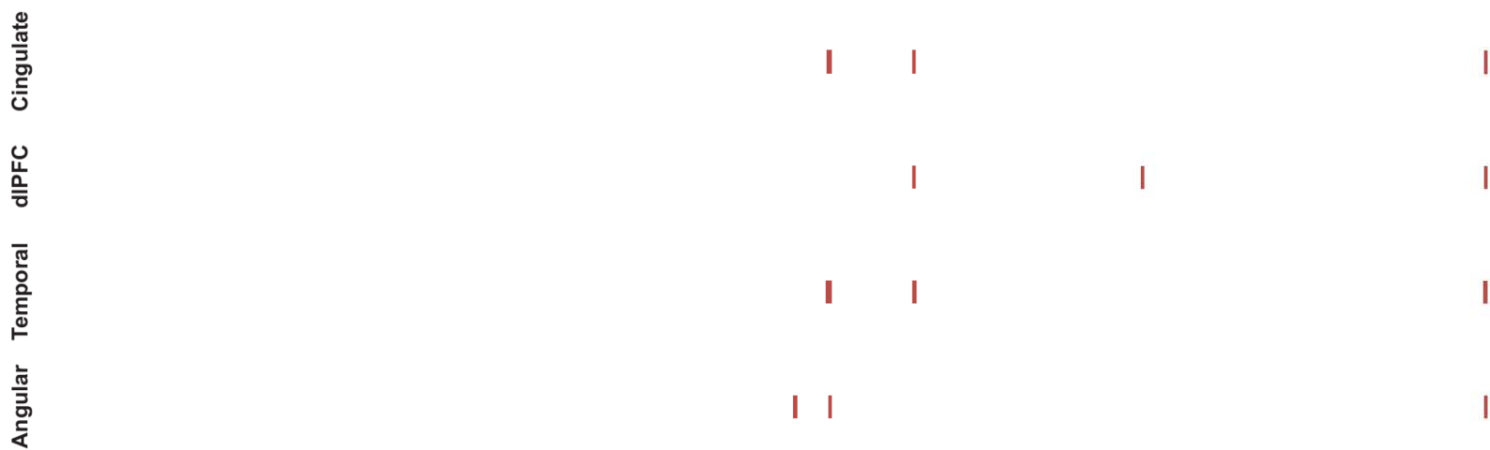

Corrected for average TH

Uncorrected

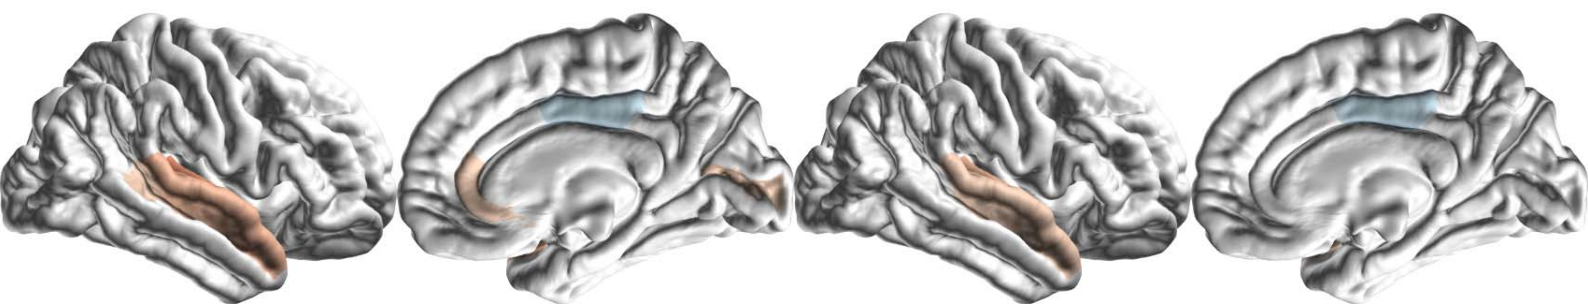

Zscore of the effect allele: A



# Lingual SA: rs1934057

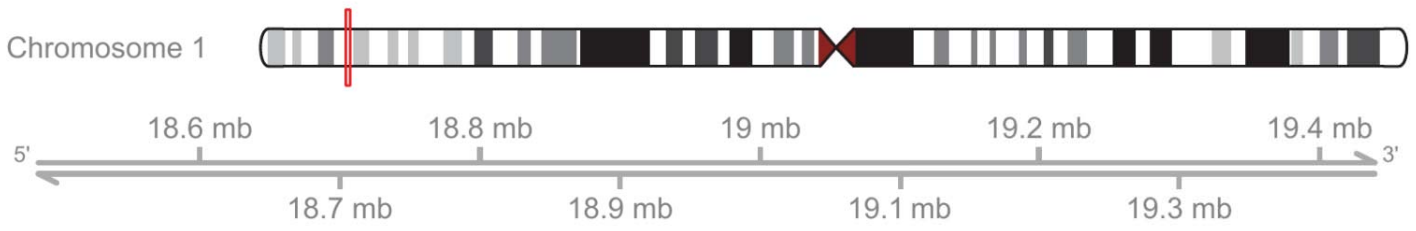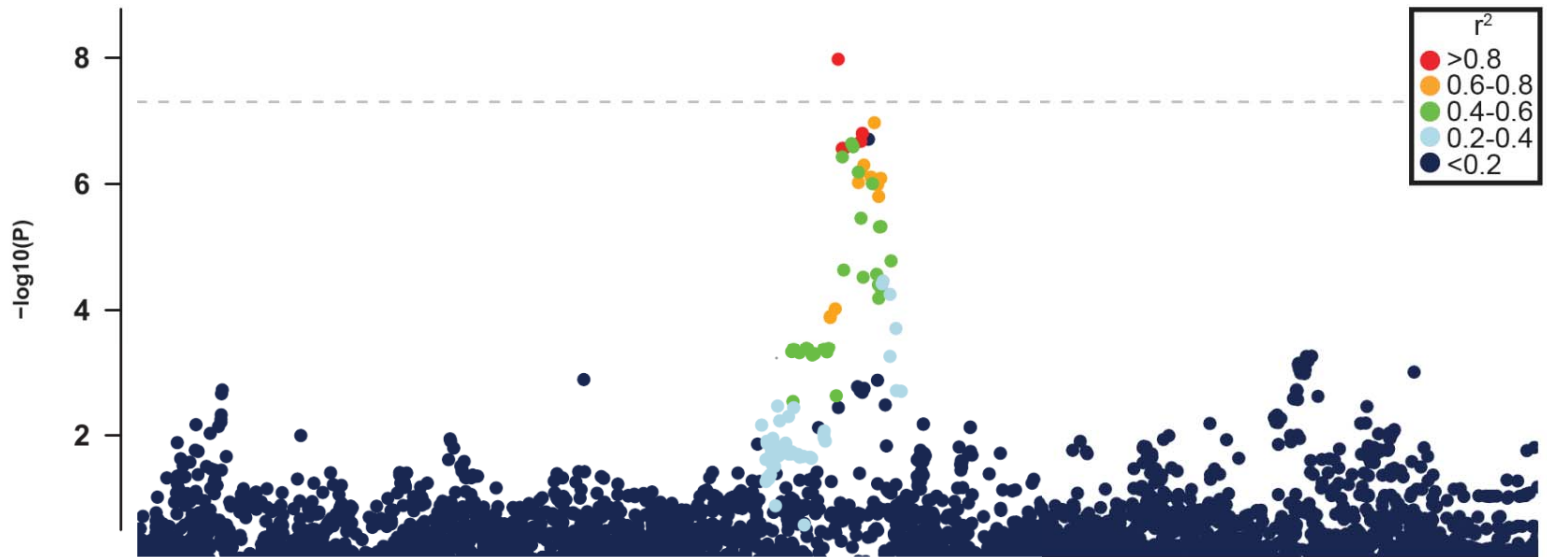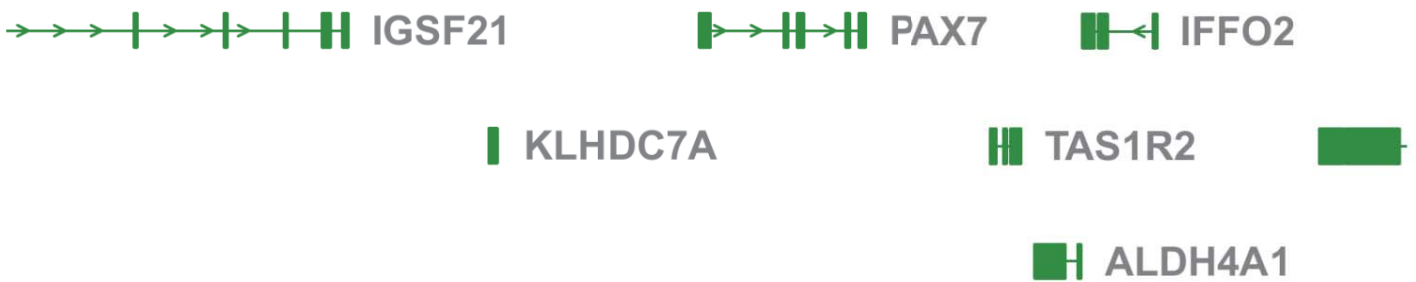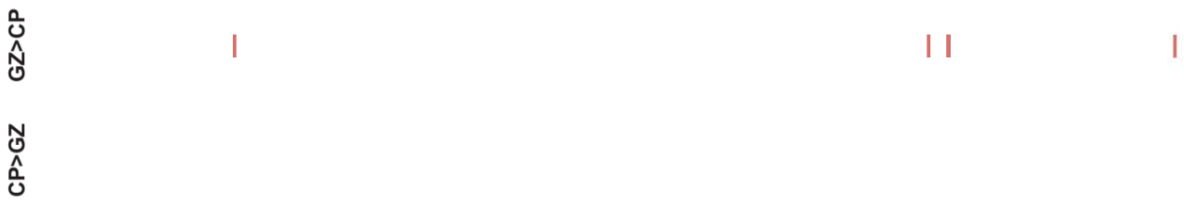

Corrected for total SA

Uncorrected

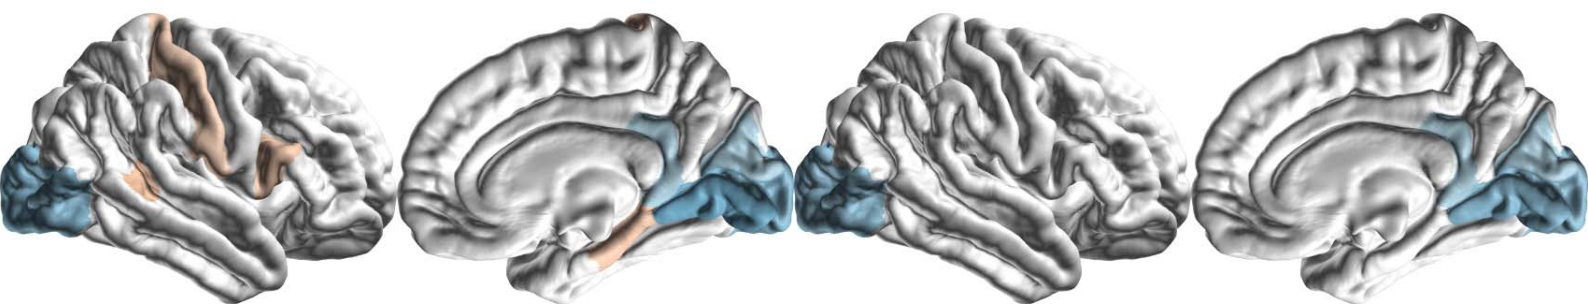

Zscore of the effect allele: T



# Lingual SA: rs1556562

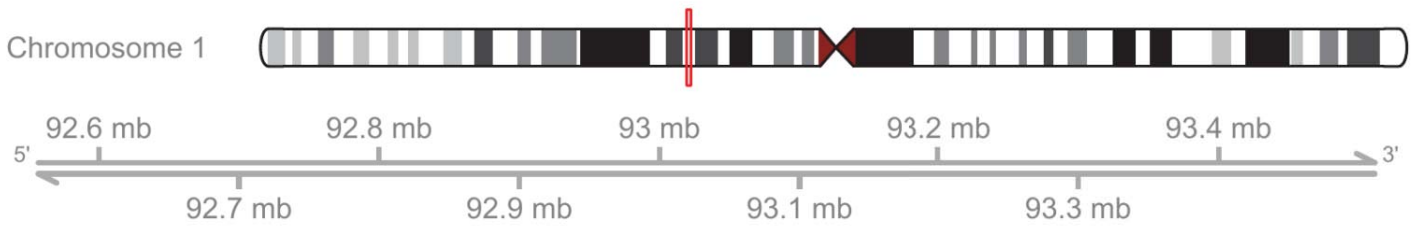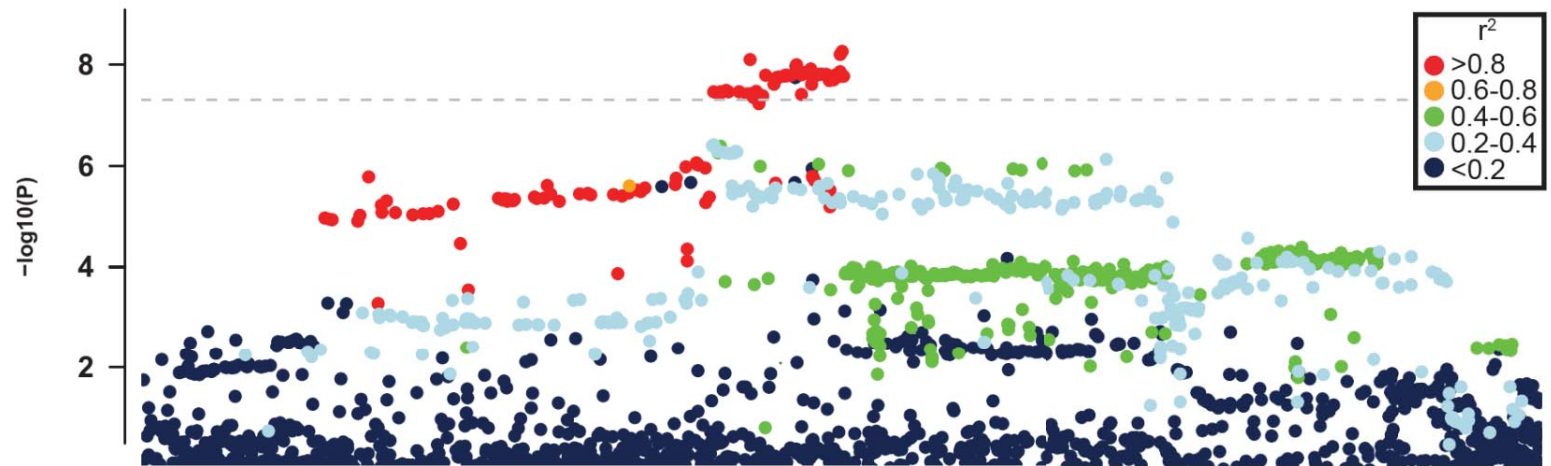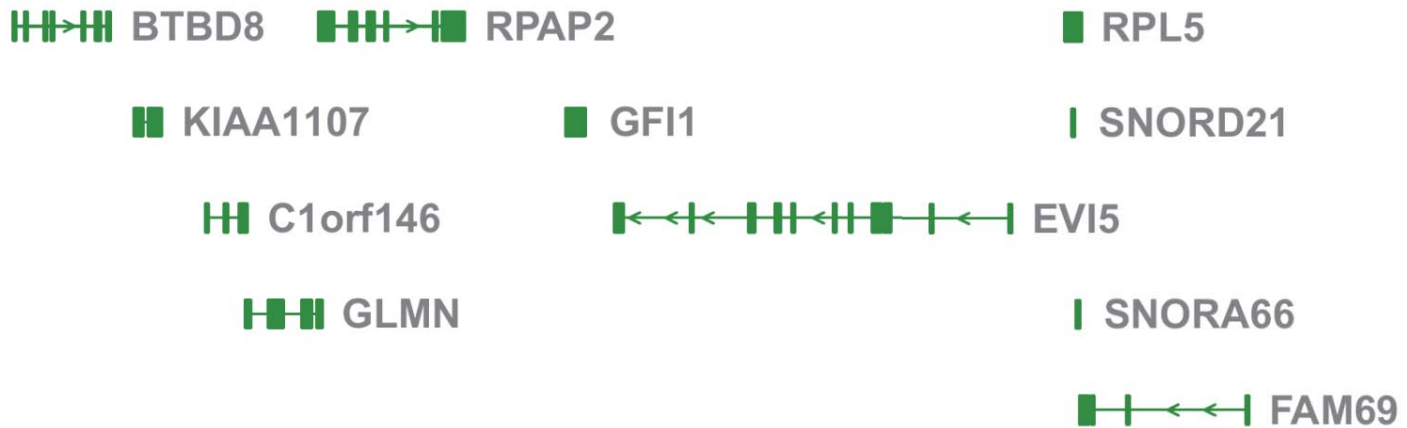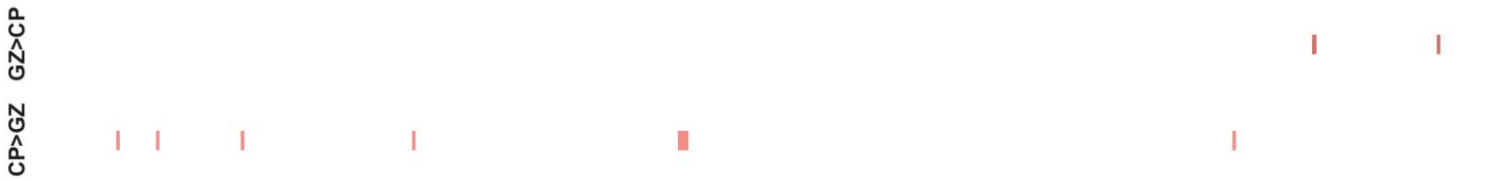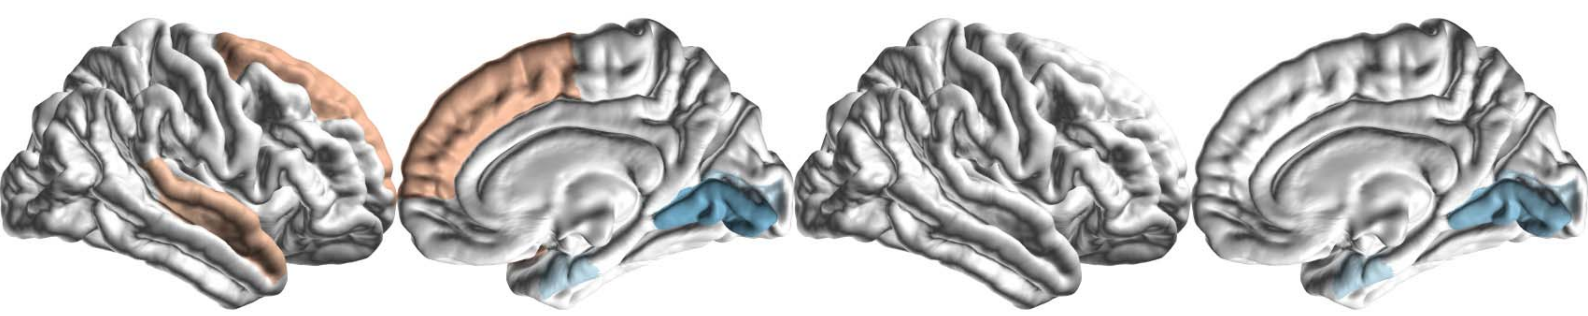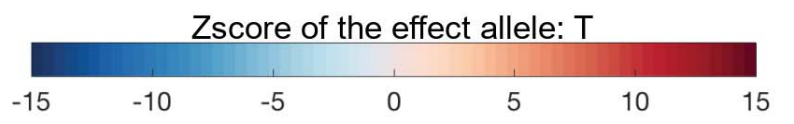



# Lingual SA: rs910697

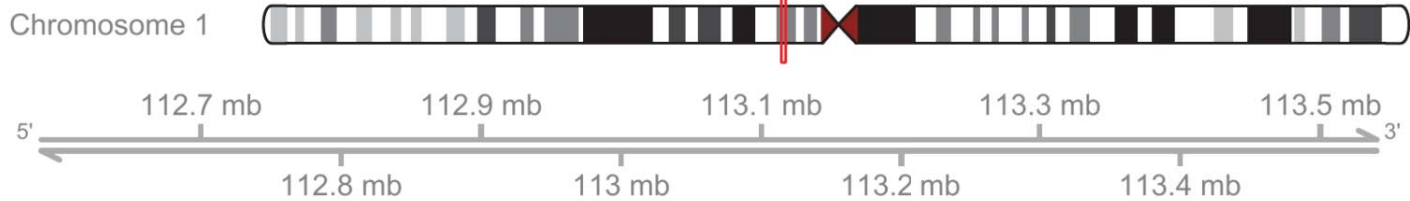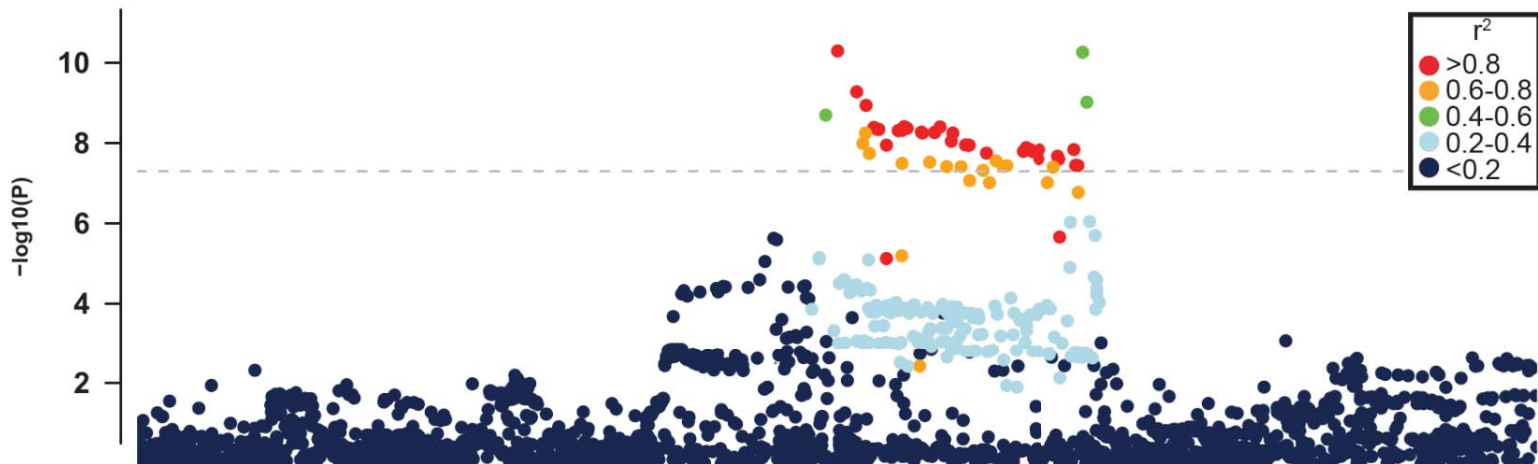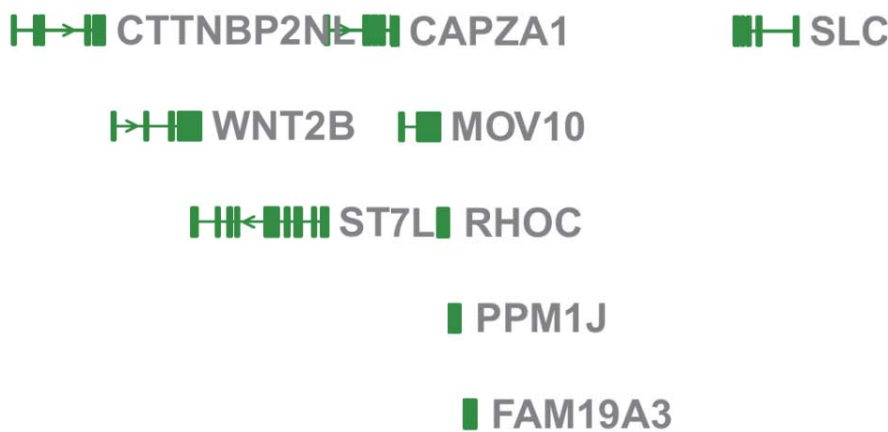

CP>GZ GZ>CP

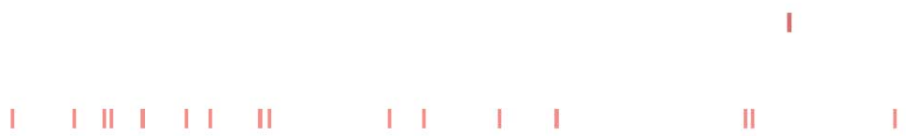

Corrected for total SA

Uncorrected

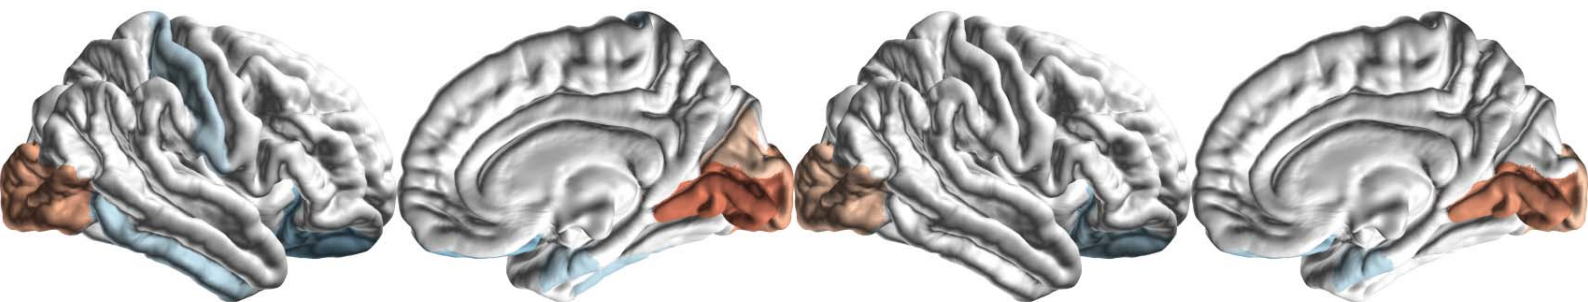

Zscore of the effect allele: A



# Lingual SA: rs1014444

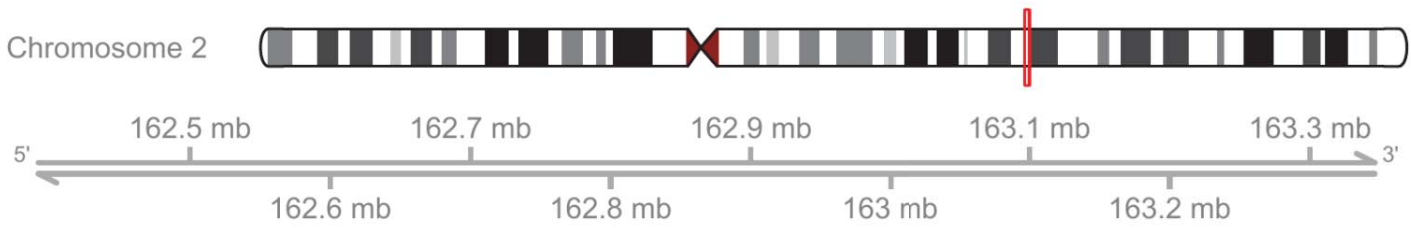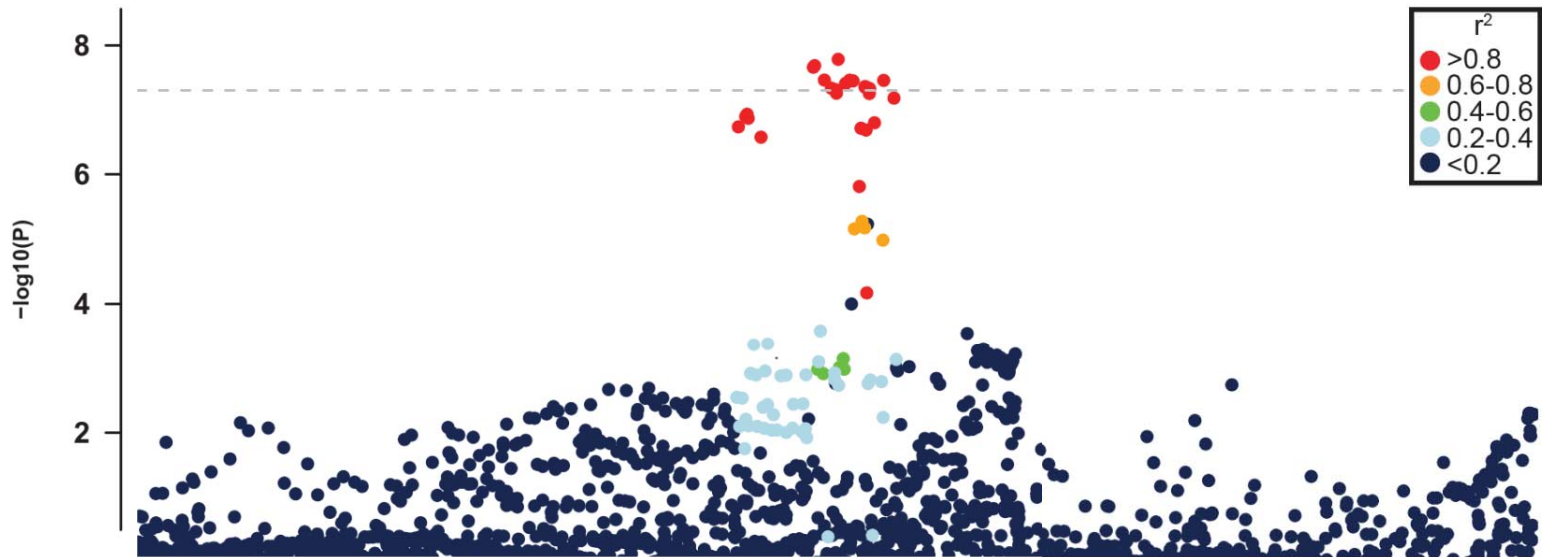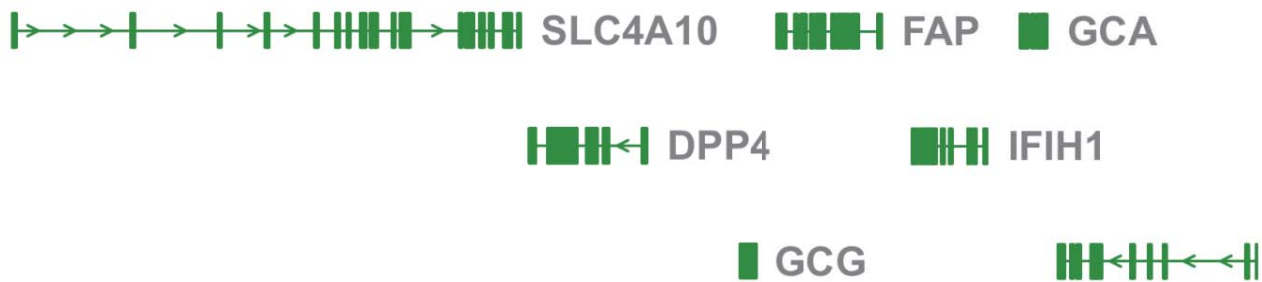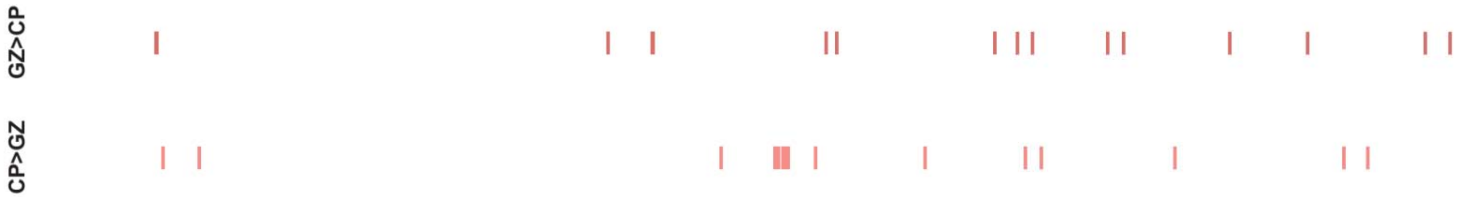

Corrected for total SA

Uncorrected

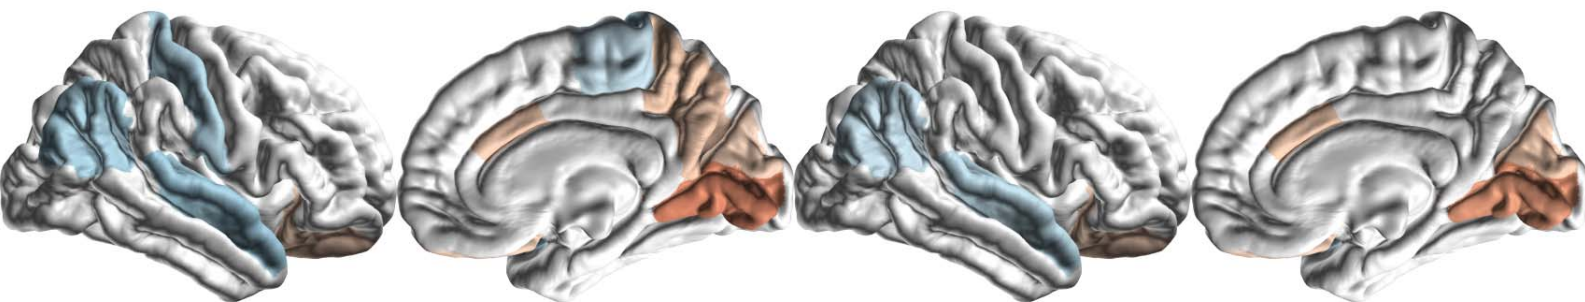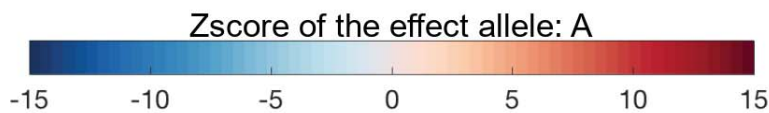

# Lingual SA: rs2118004

Chromosome 3

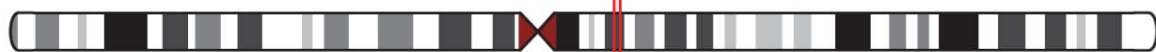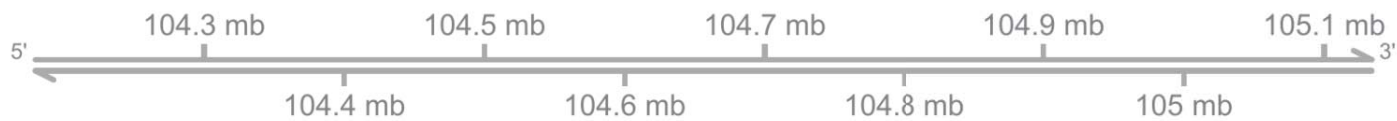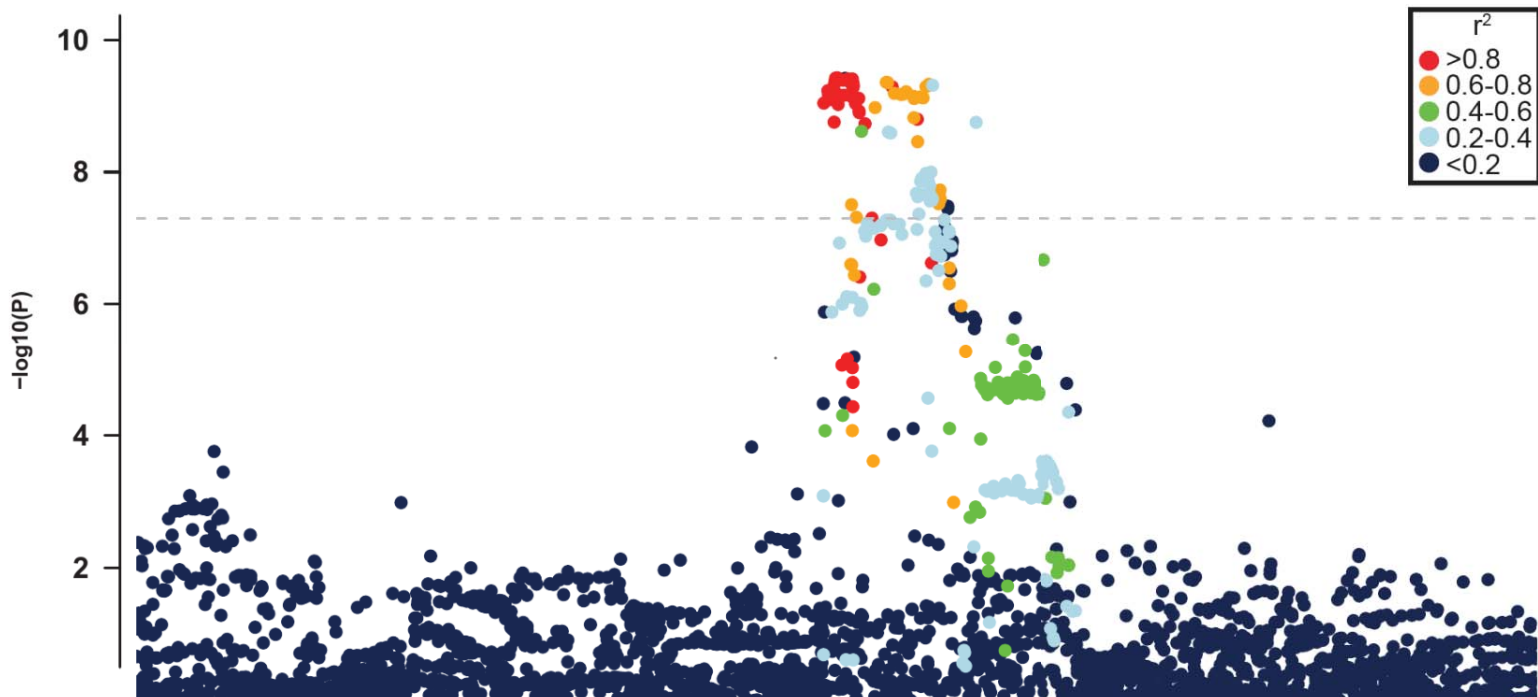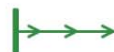

GZ>CP

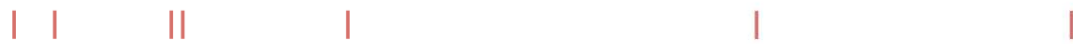

CP>GZ

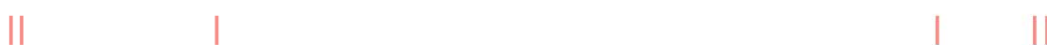

Corrected for total SA

Uncorrected

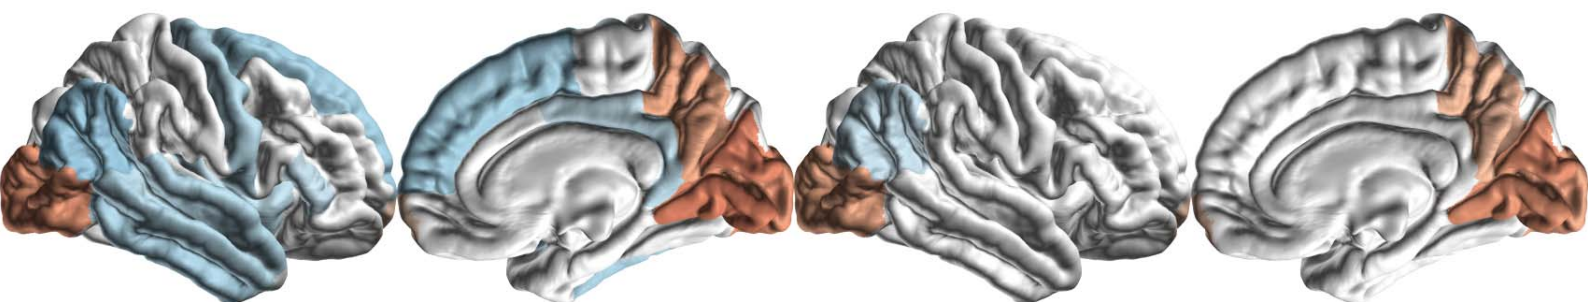

Zscore of the effect allele: T

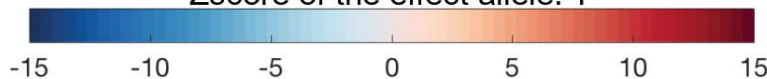



# Lingual SA: rs61508189

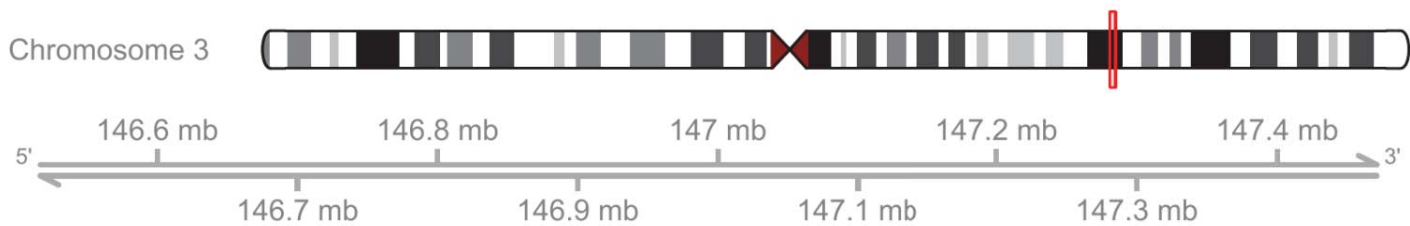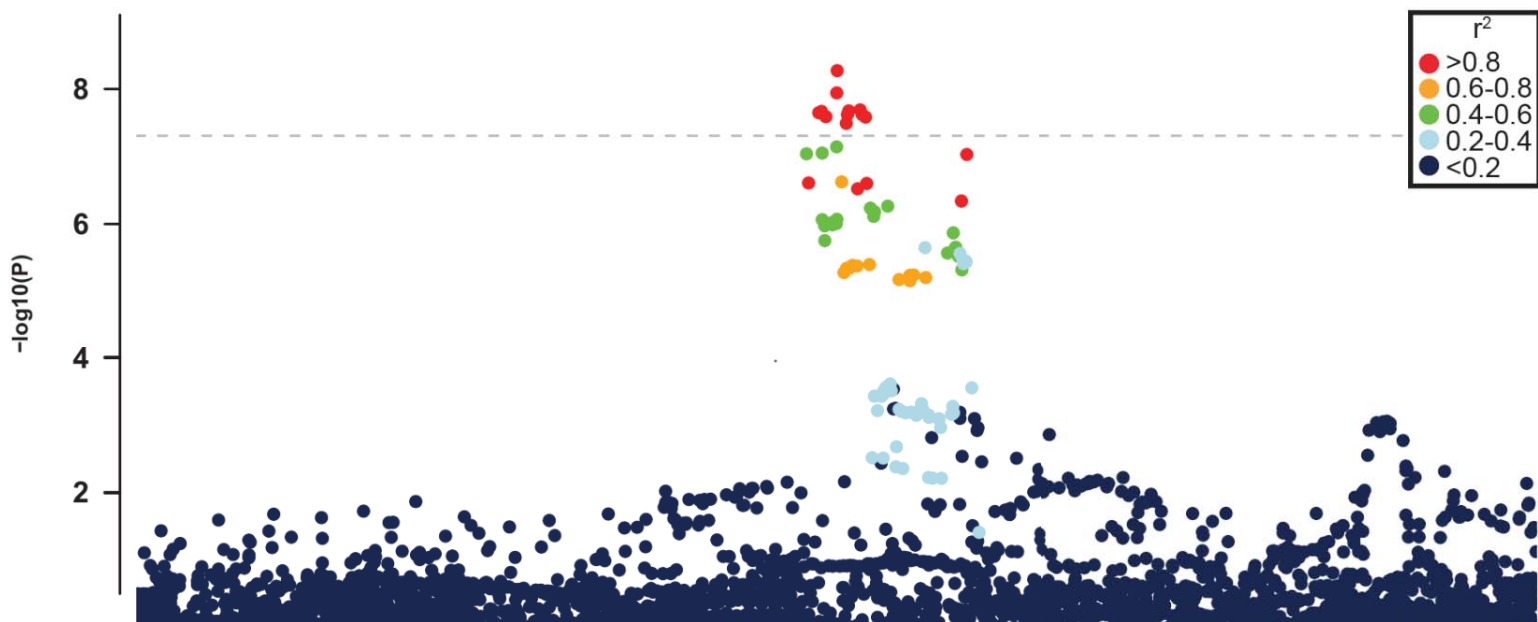

ZIC4

ZIC1

GZ>CP

CP>GZ

Corrected for total SA

Uncorrected

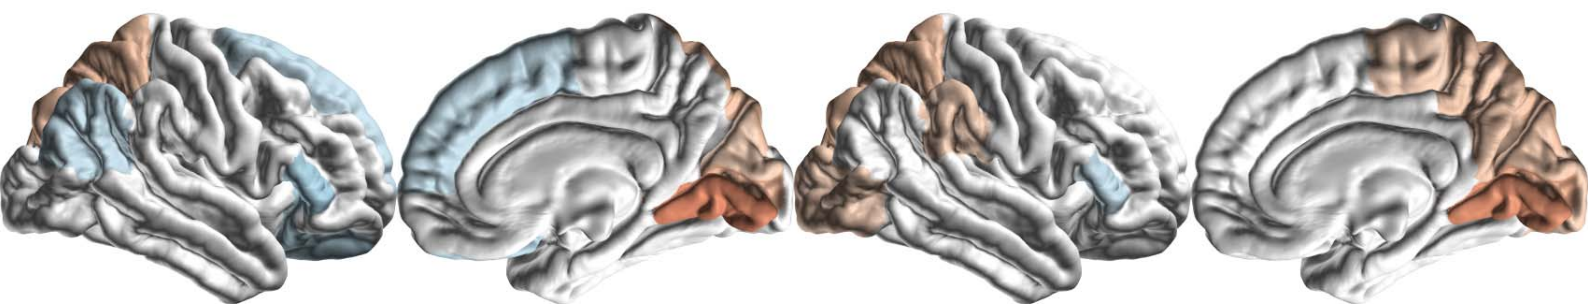

Zscore of the effect allele: A



# Lingual SA: rs6812278

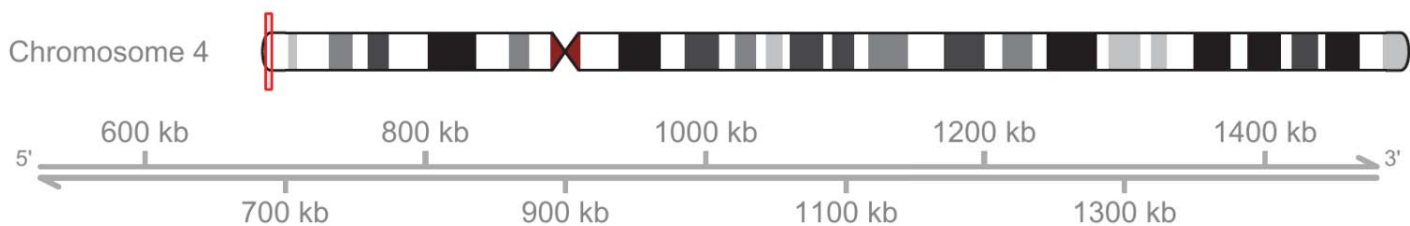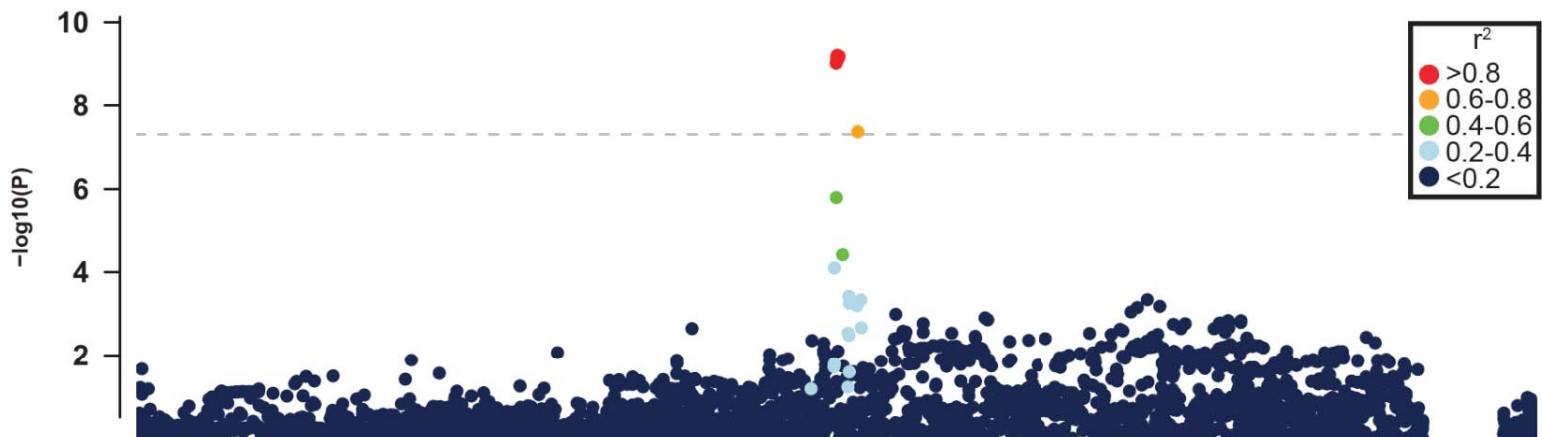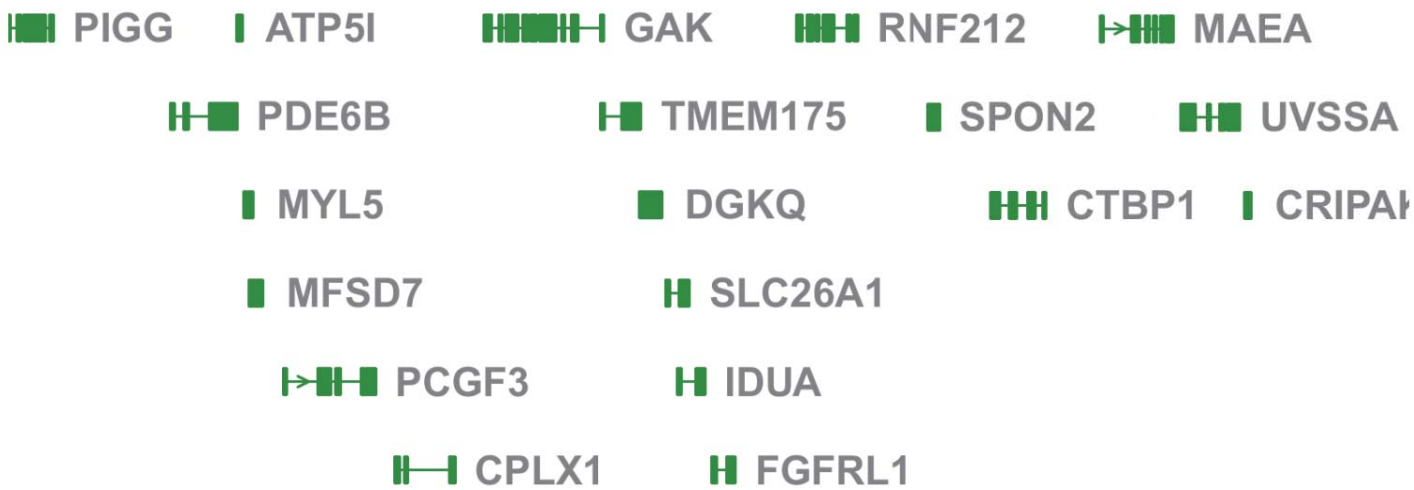

CP>GZ GZ>CP

Corrected for total SA

Uncorrected

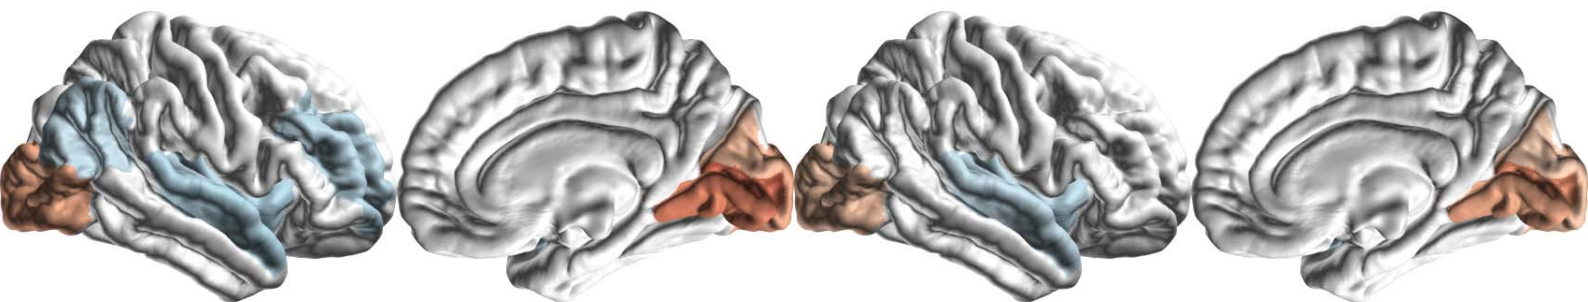

Zscore of the effect allele: C

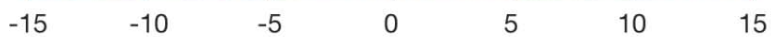

# Lingual SA: rs17419290

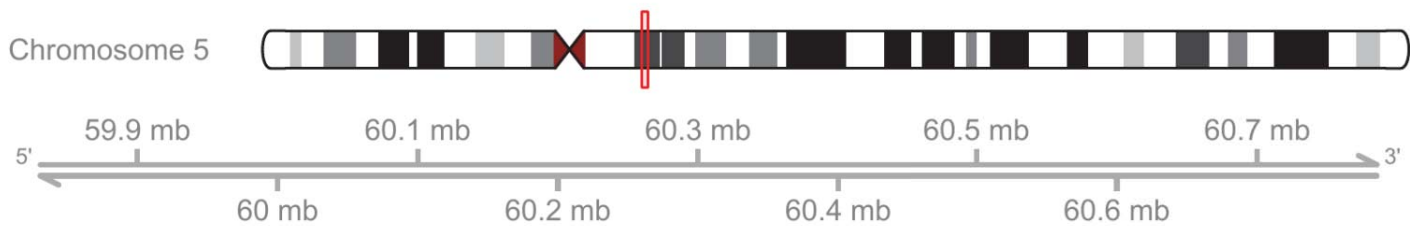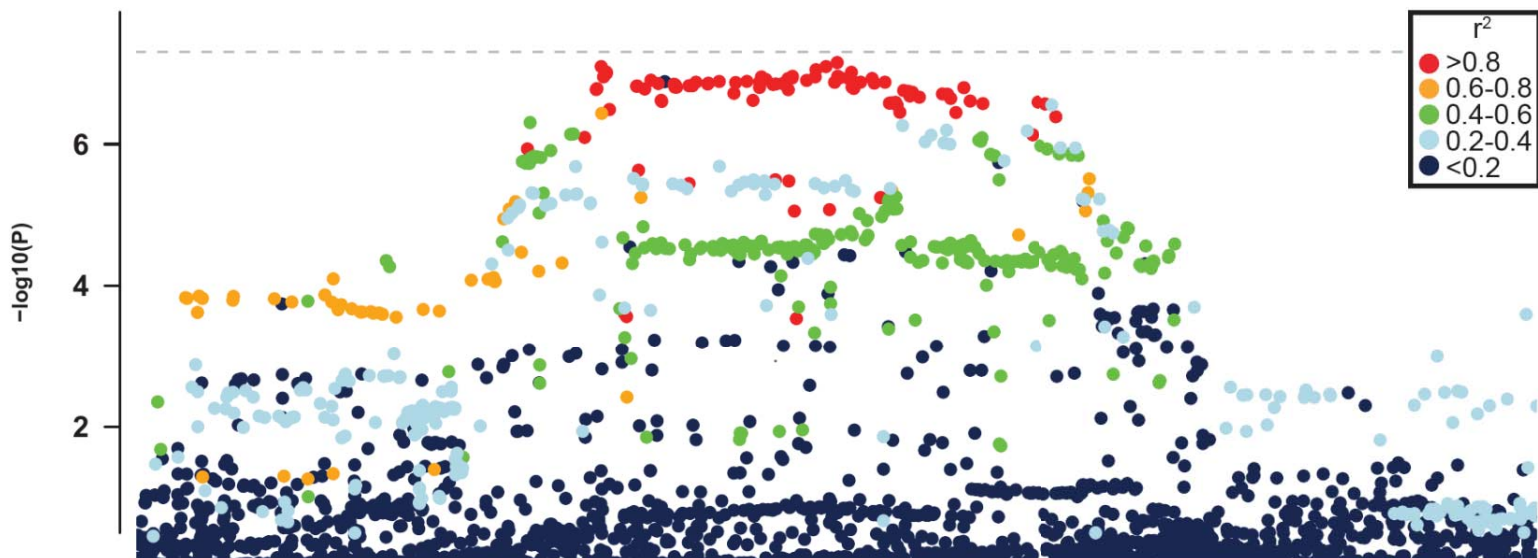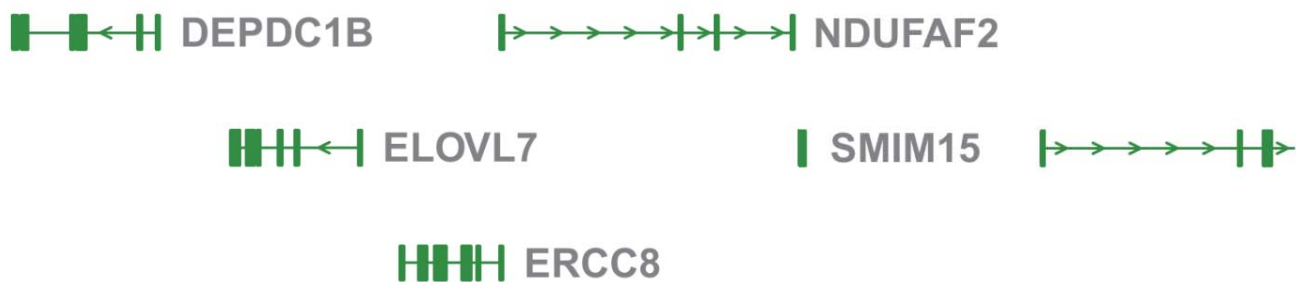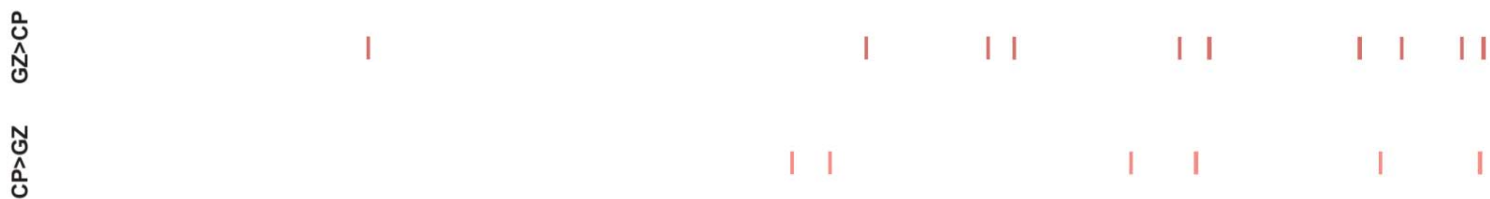

Corrected for total SA

Uncorrected

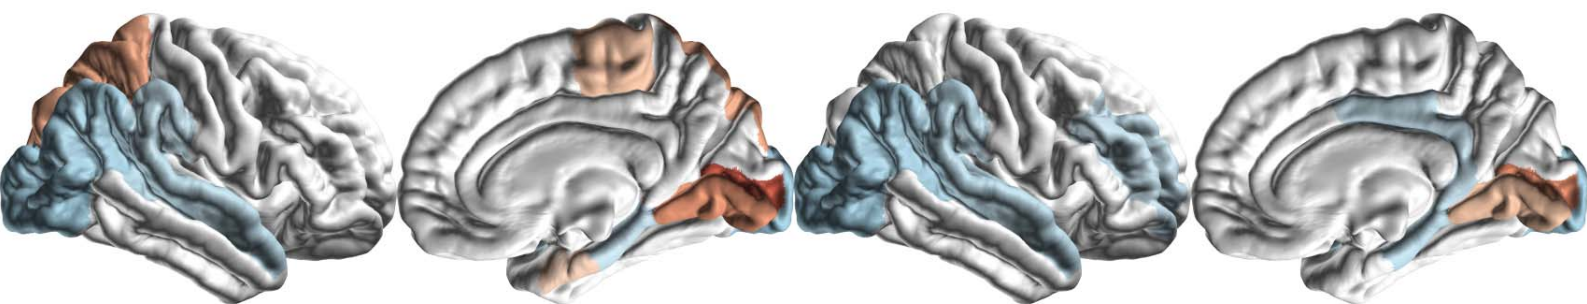



# Lingual SA: rs9401907

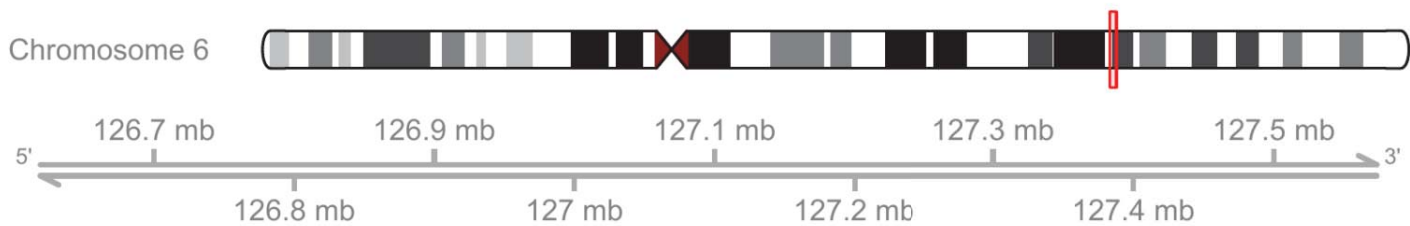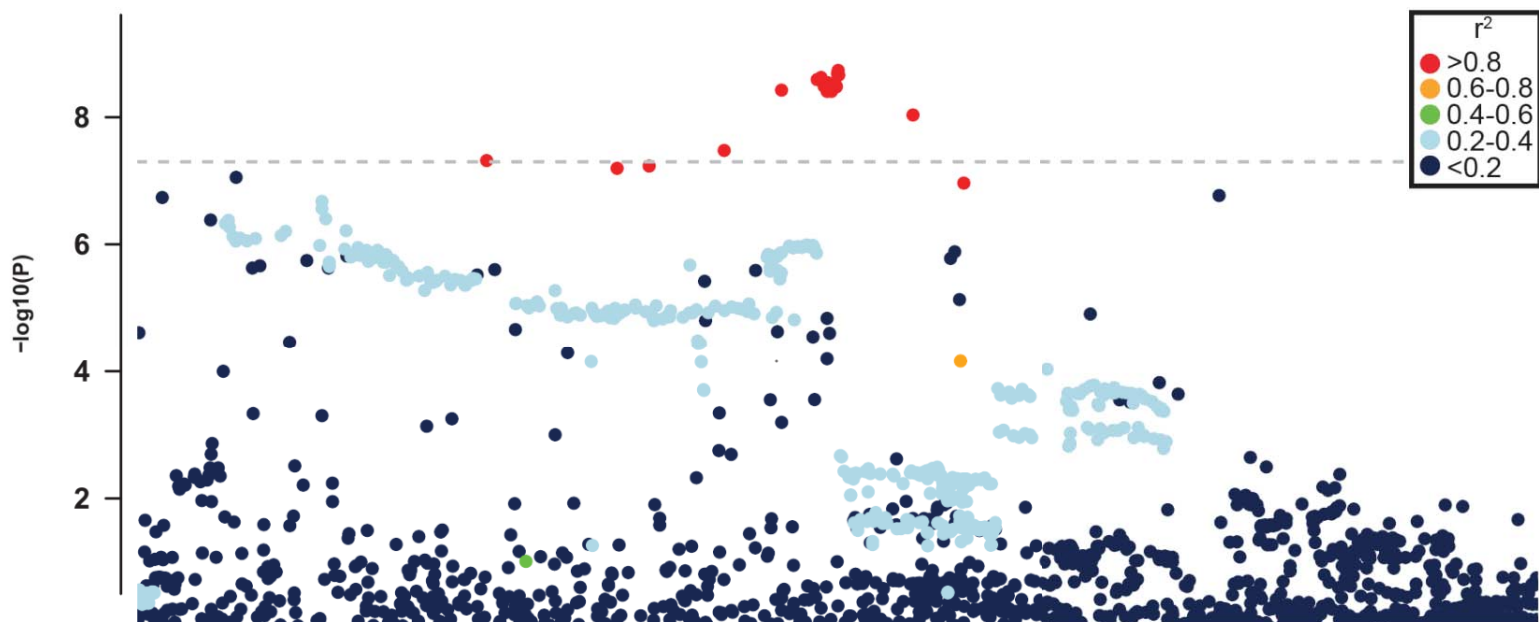

CENPW

RSP

GZ>CP

CP>GZ

Corrected for total SA

Uncorrected

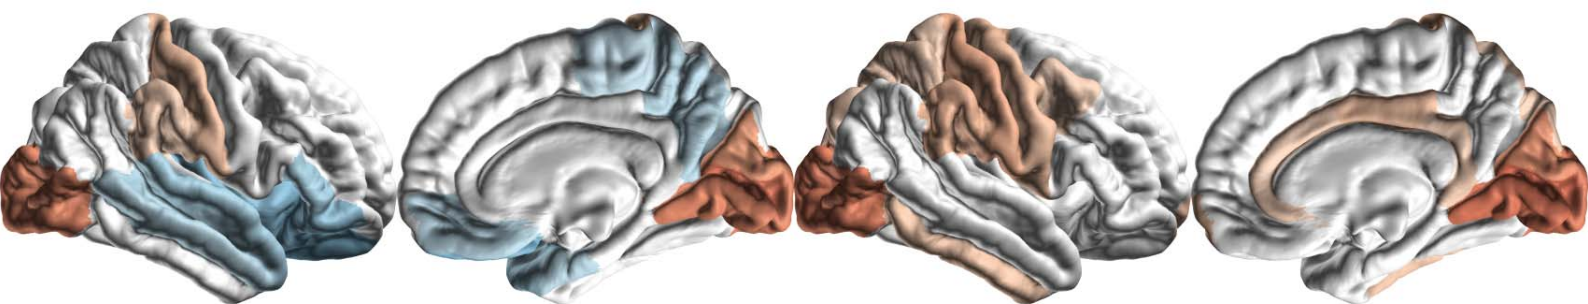

Zscore of the effect allele: T



# Lingual SA: rs10237366

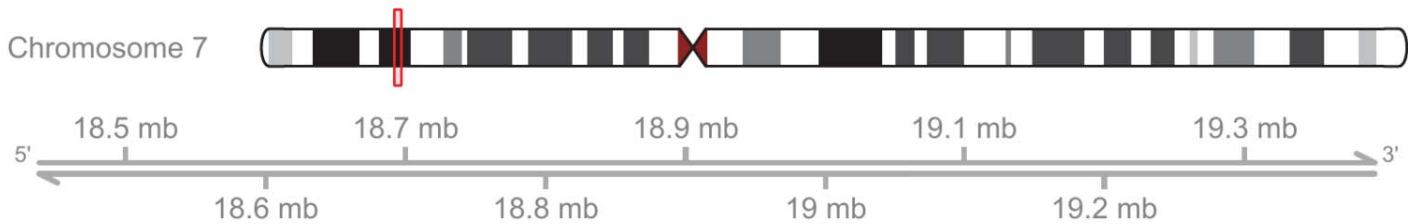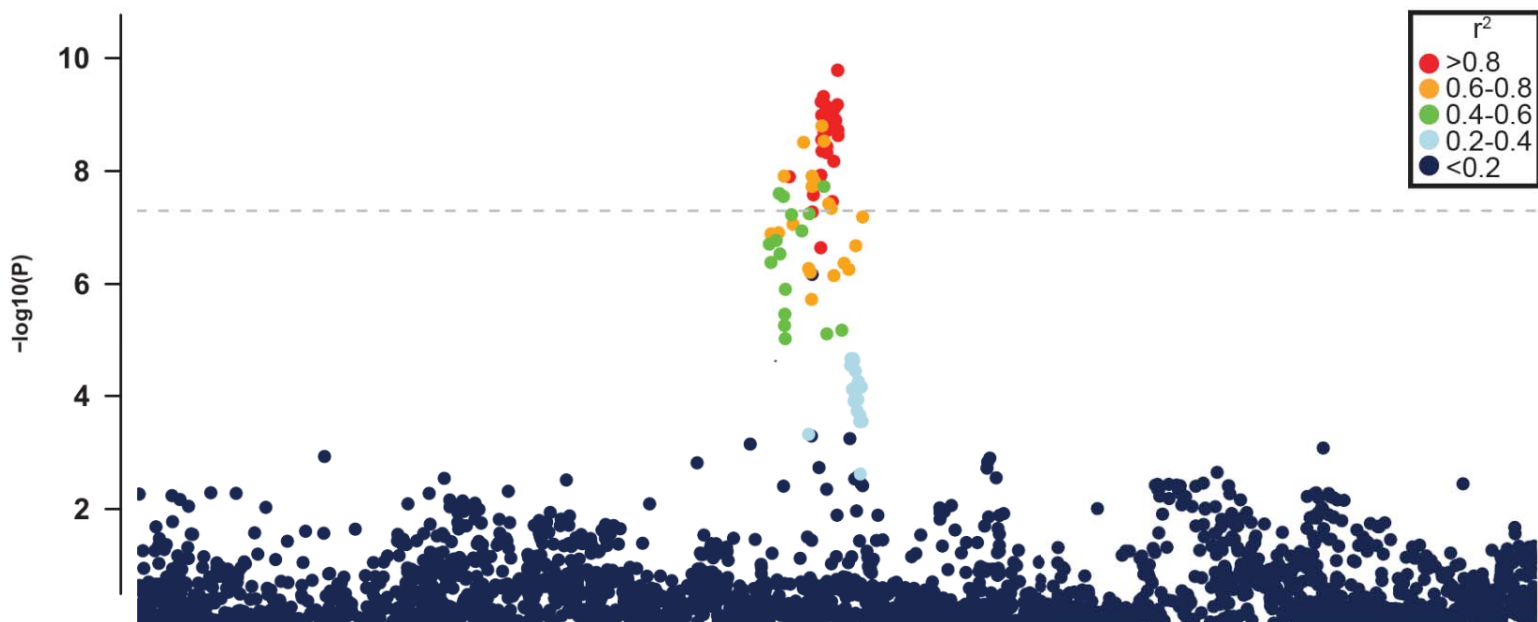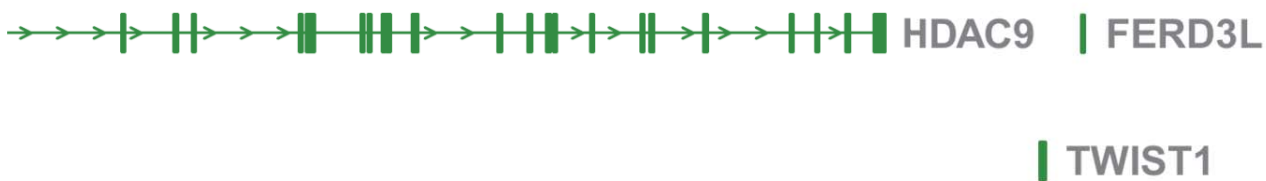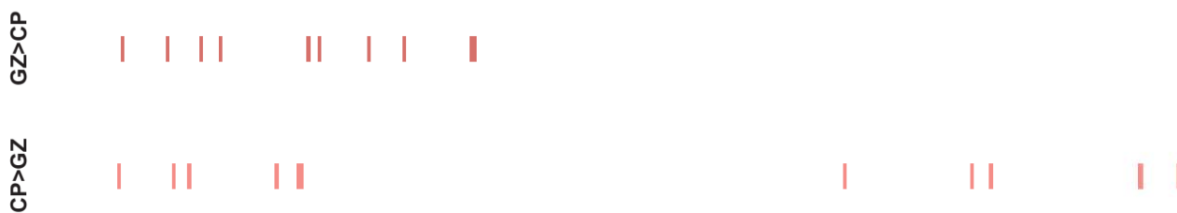

Corrected for total SA

Uncorrected

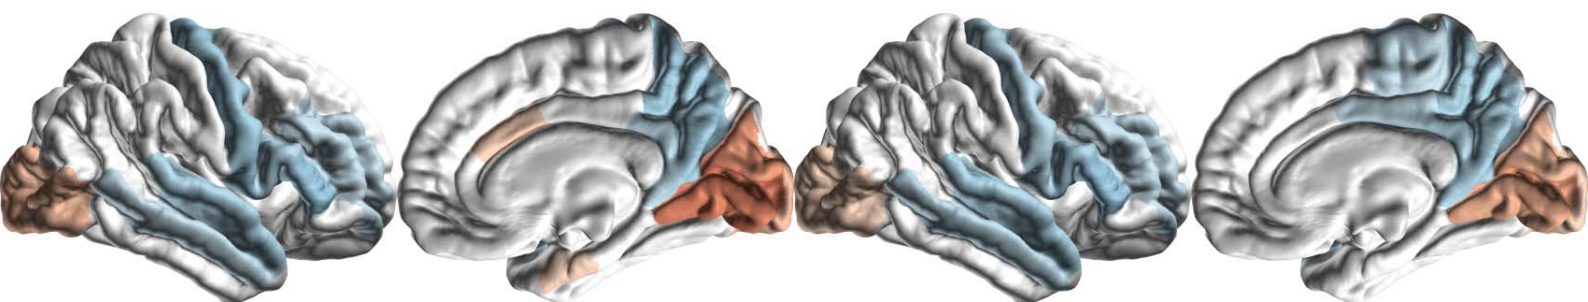

# Lingual SA: rs7809950

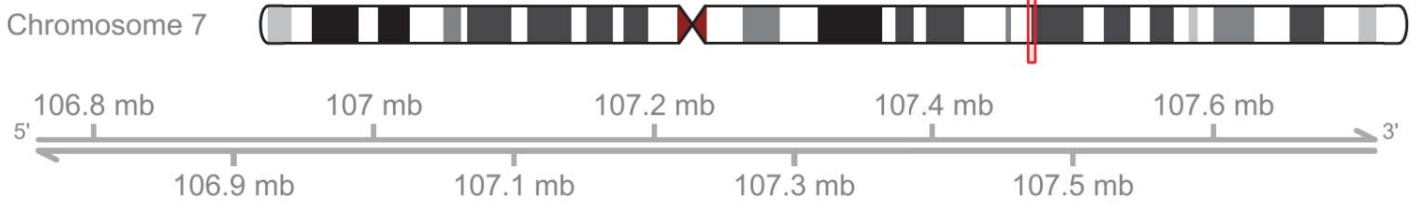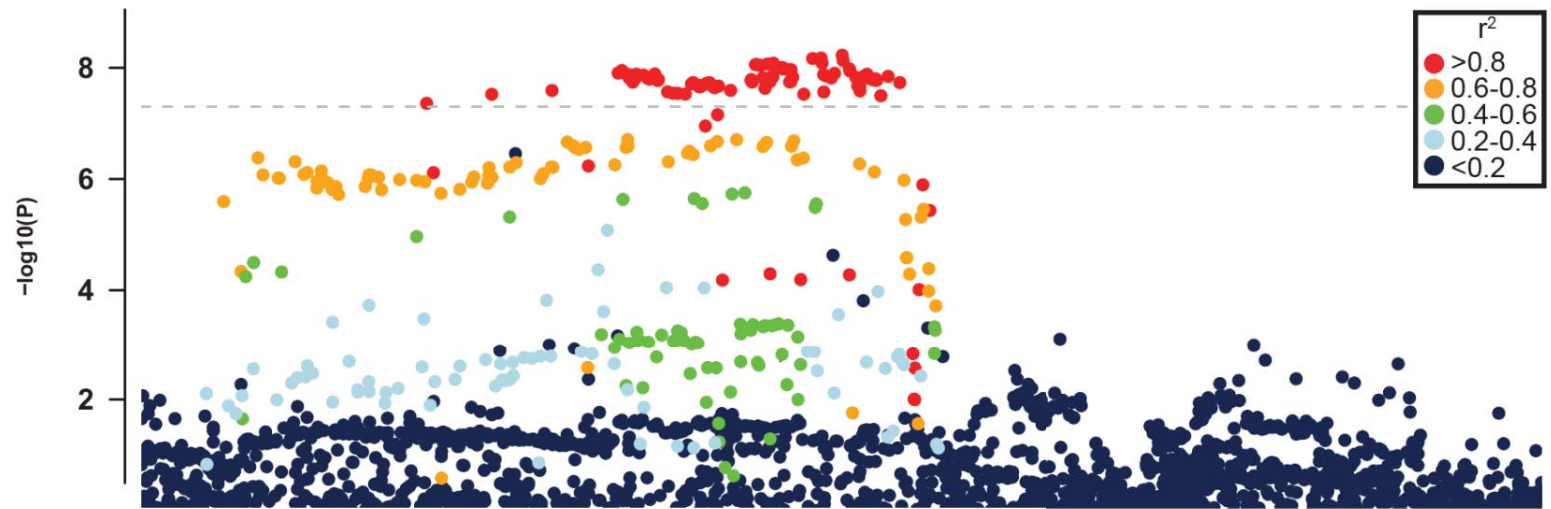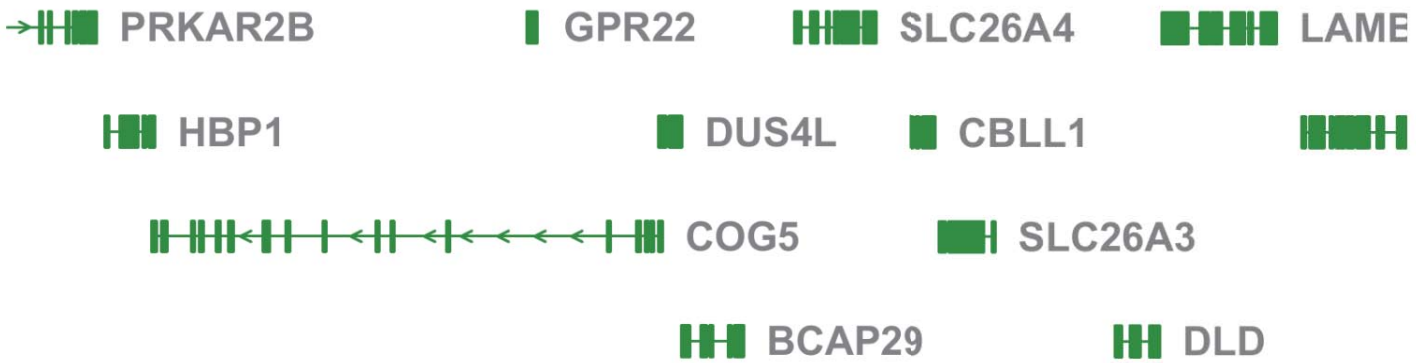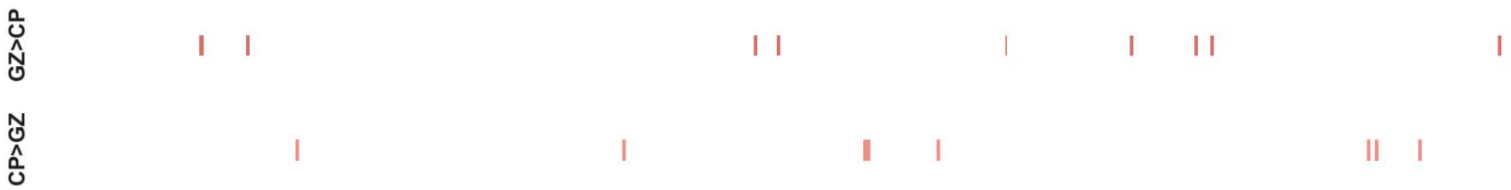

Corrected for total SA

Uncorrected

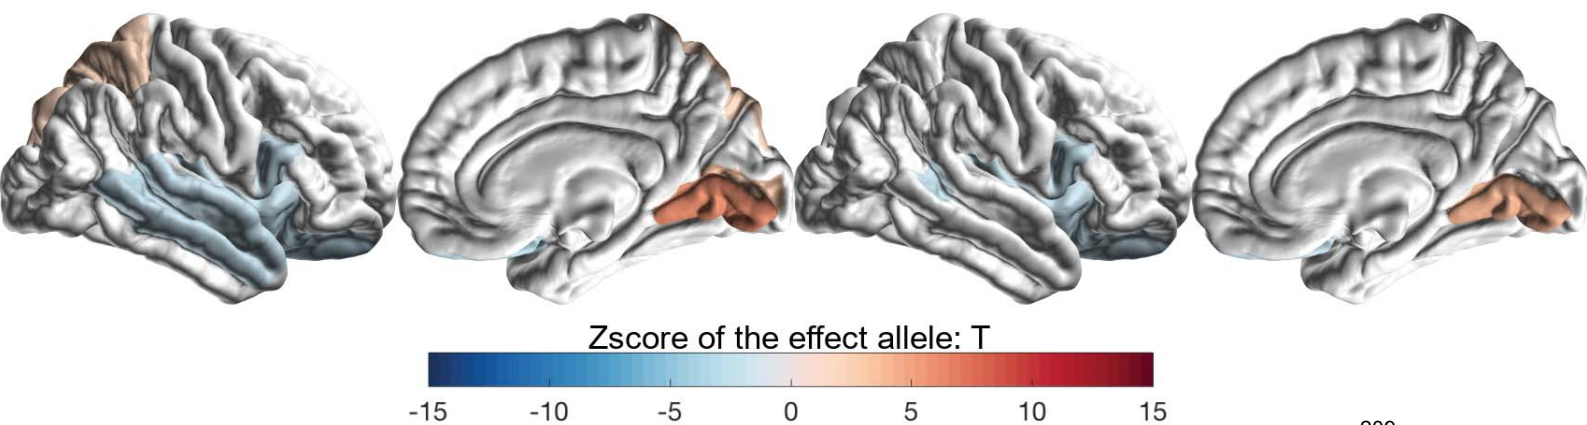



# Lingual SA: rs28410513

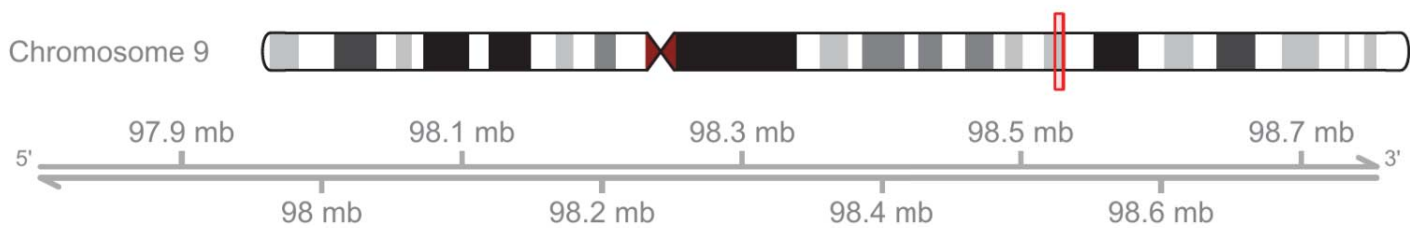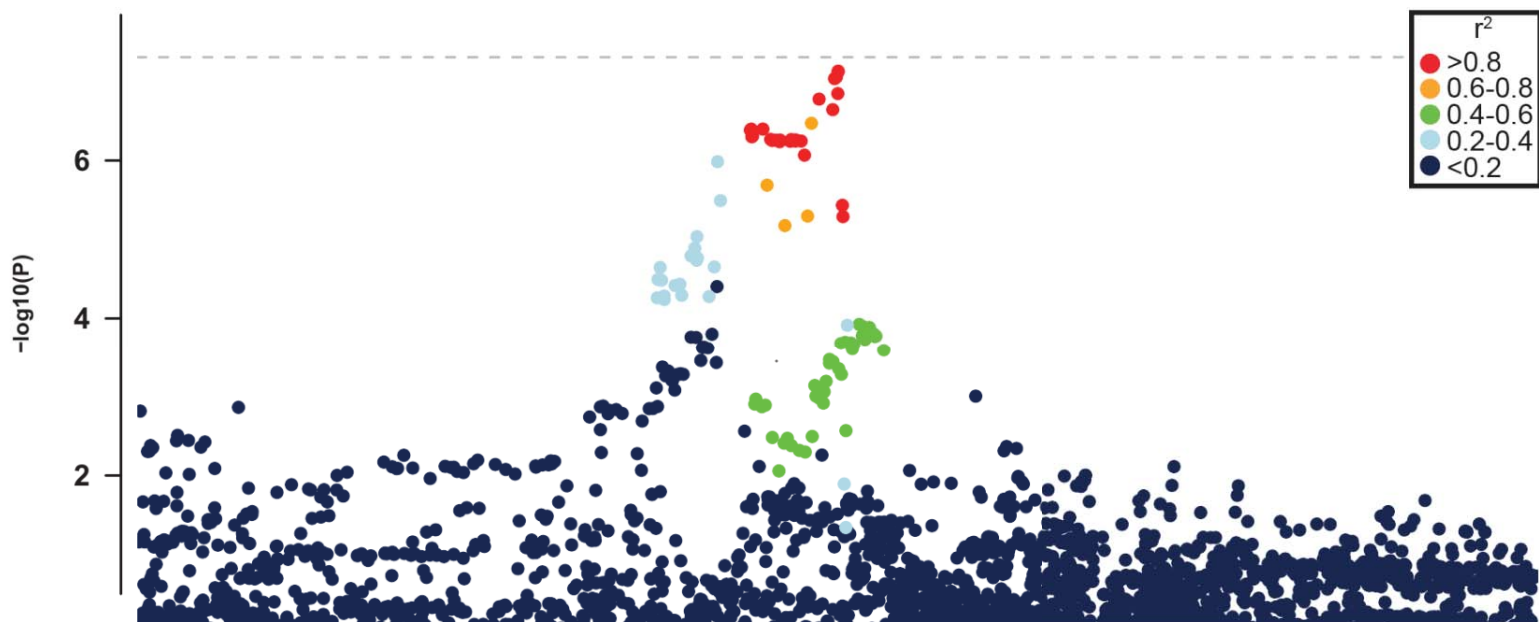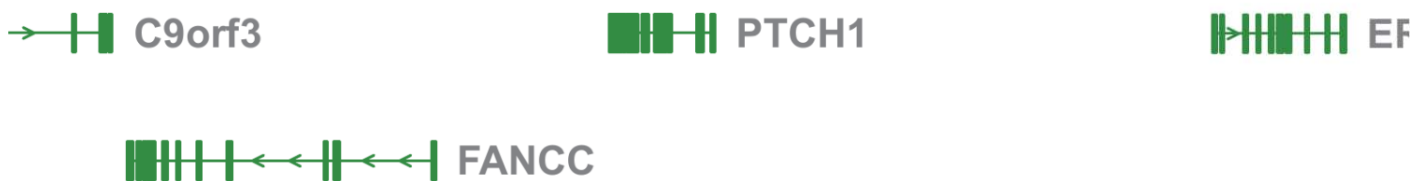

GZ>CP  
CP>GZ

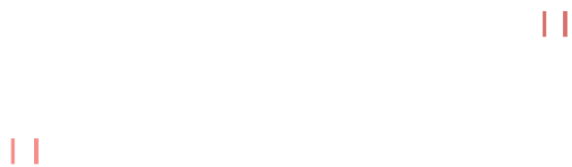

Corrected for total SA

Uncorrected

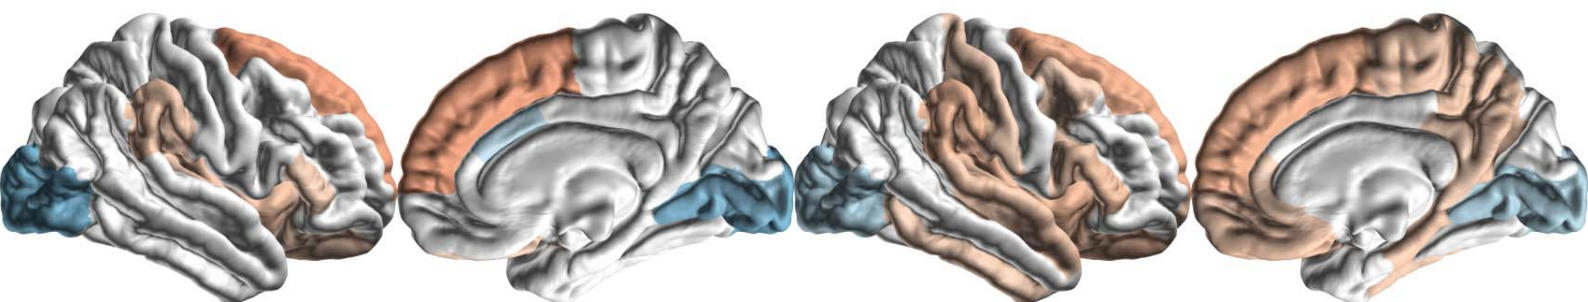

Zscore of the effect allele: T



# Lingual SA: rs7914158

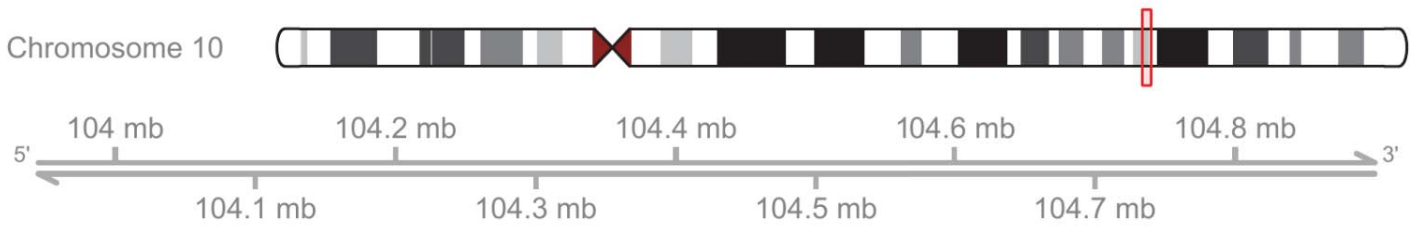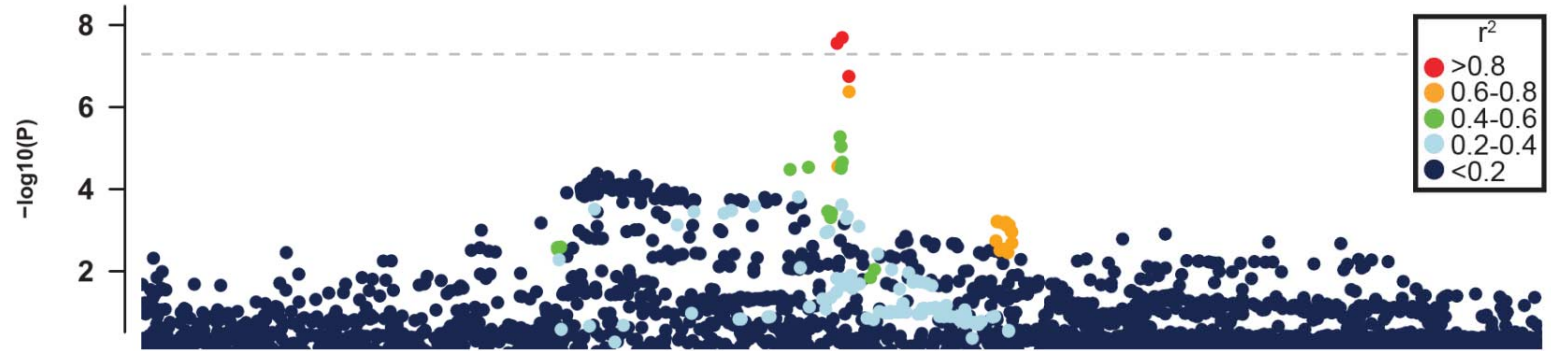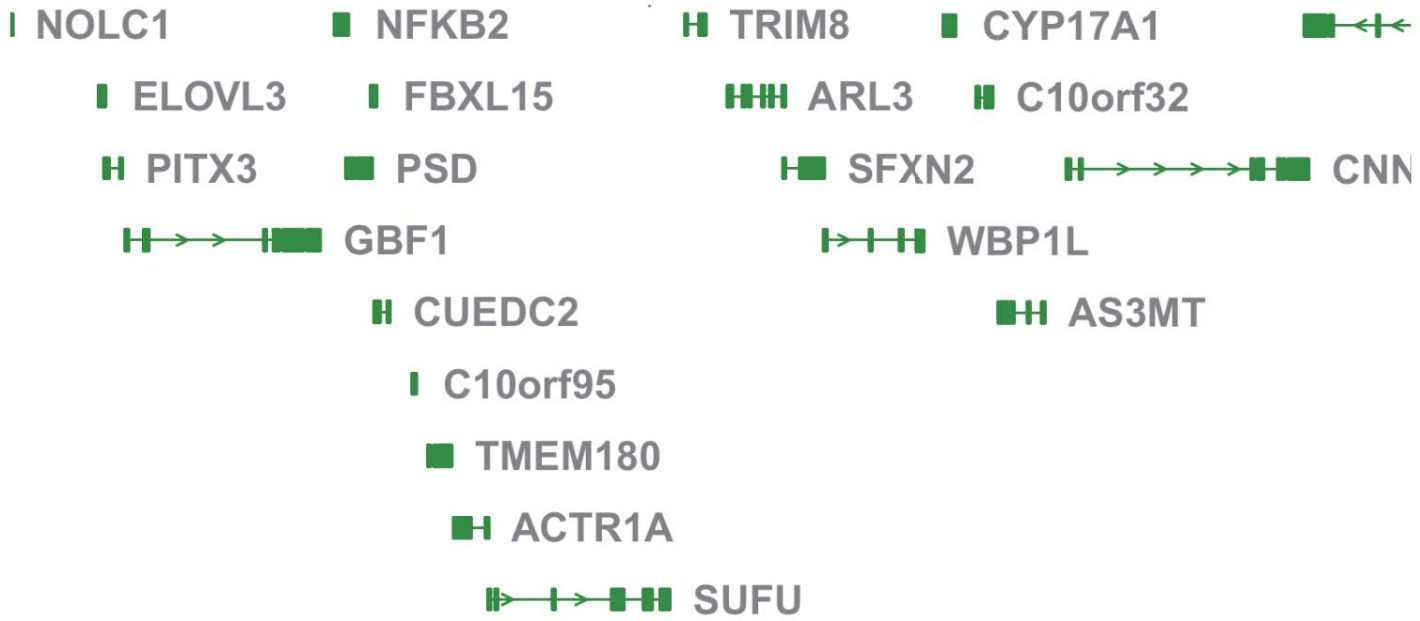

CP>GZGZ>CP

Corrected for total SA

Uncorrected

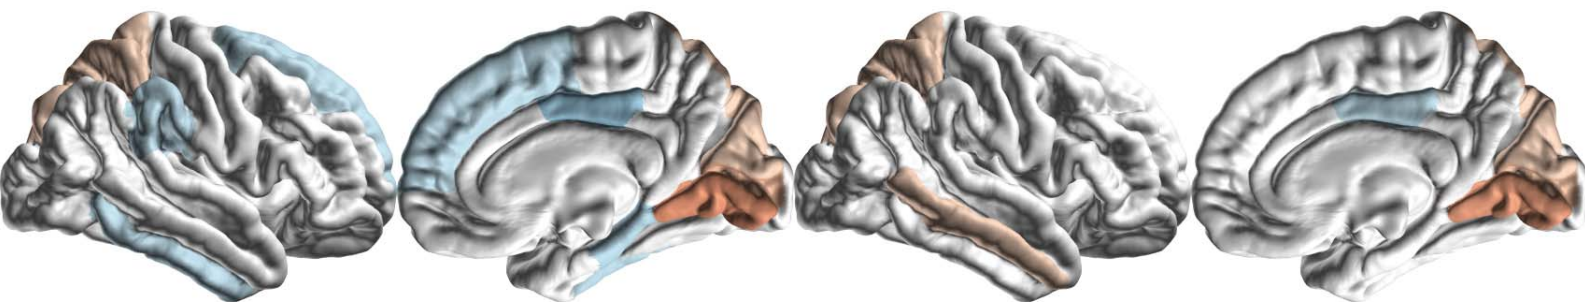

Zscore of the effect allele: T



# Lingual SA: rs2022130

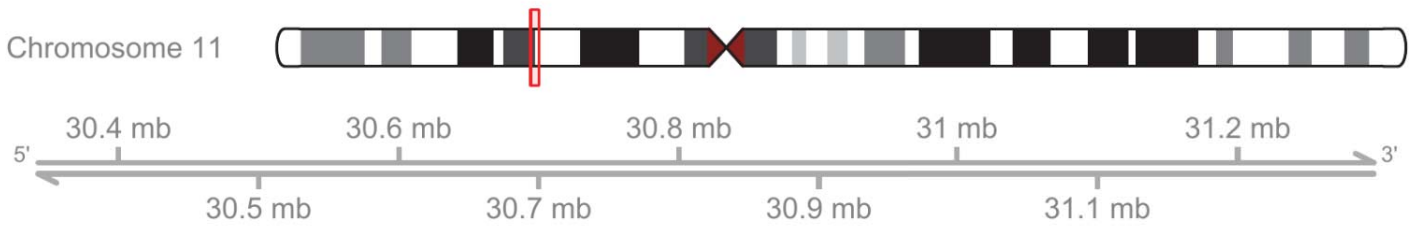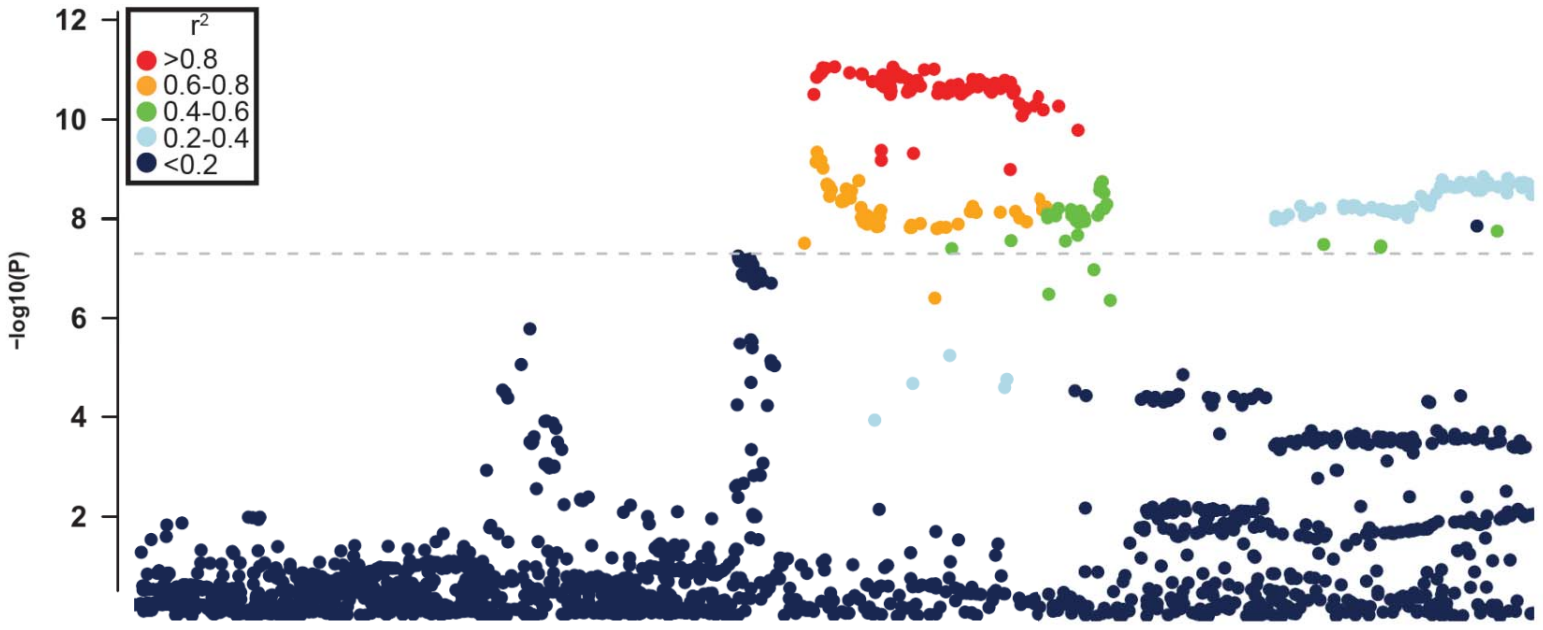

ARL14EP

MPPED2

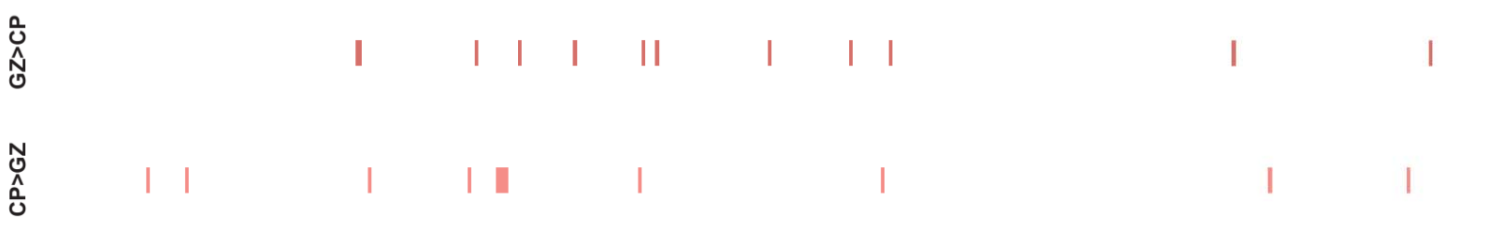

Corrected for total SA

Uncorrected

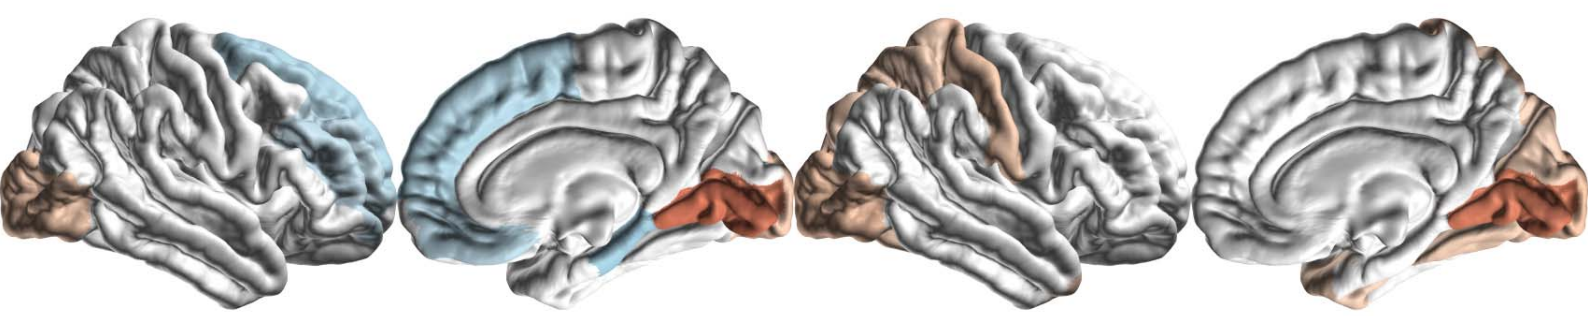



# Lingual SA: rs9545158

Chromosome 13

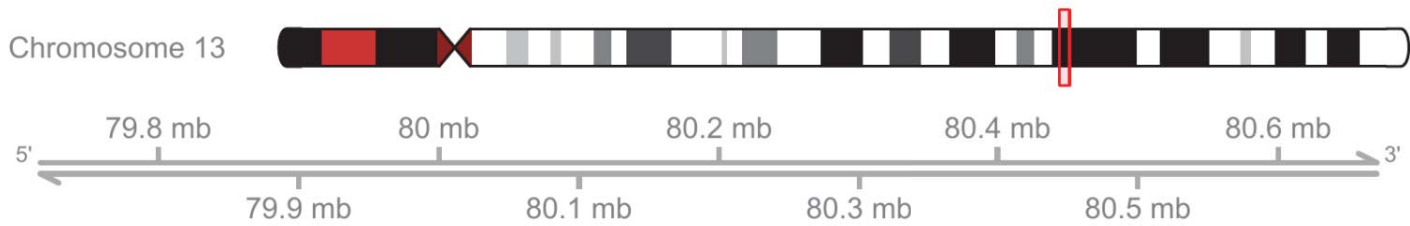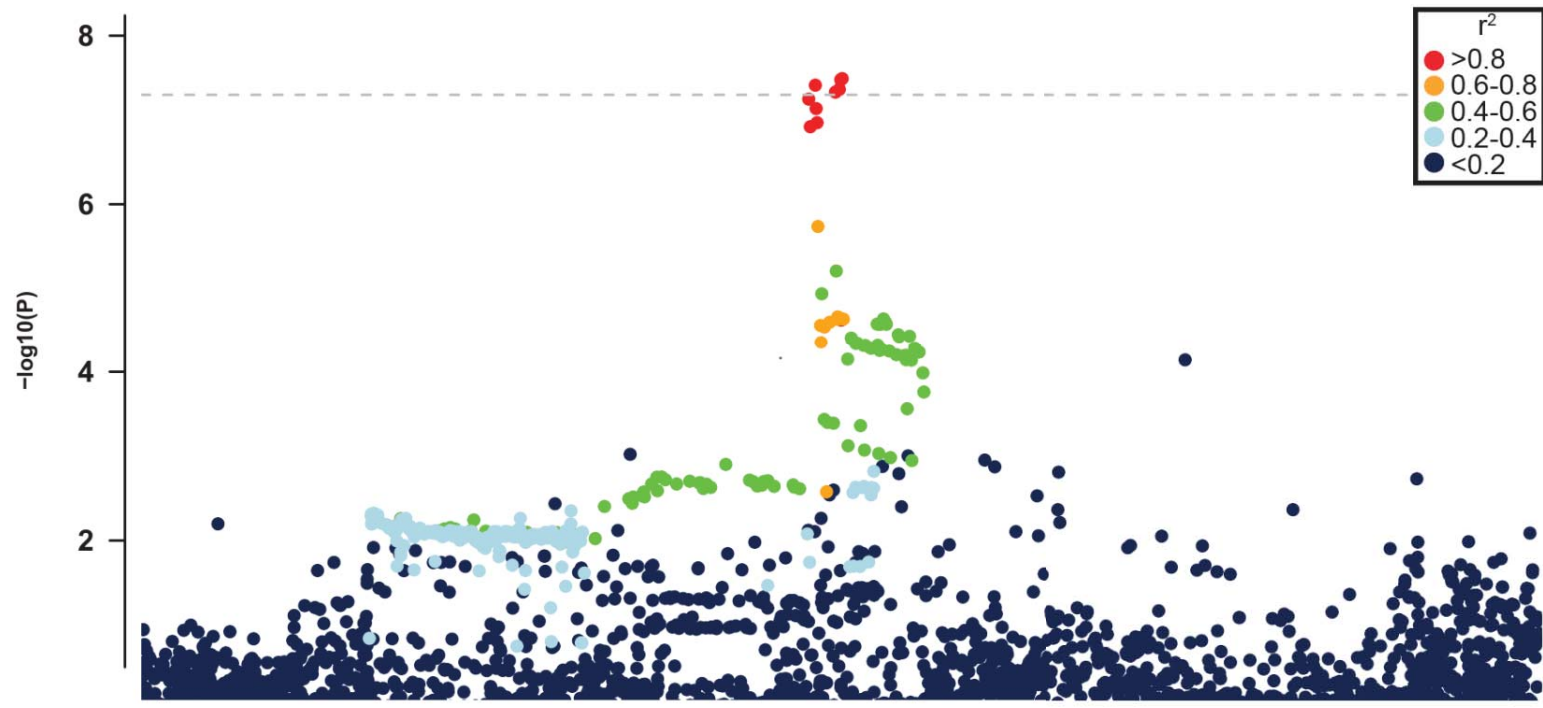

RBM26 NDFIP2

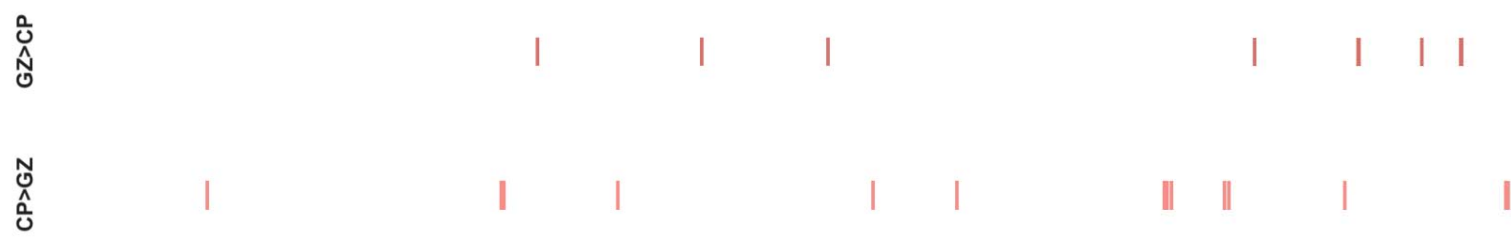

Corrected for total SA

Uncorrected

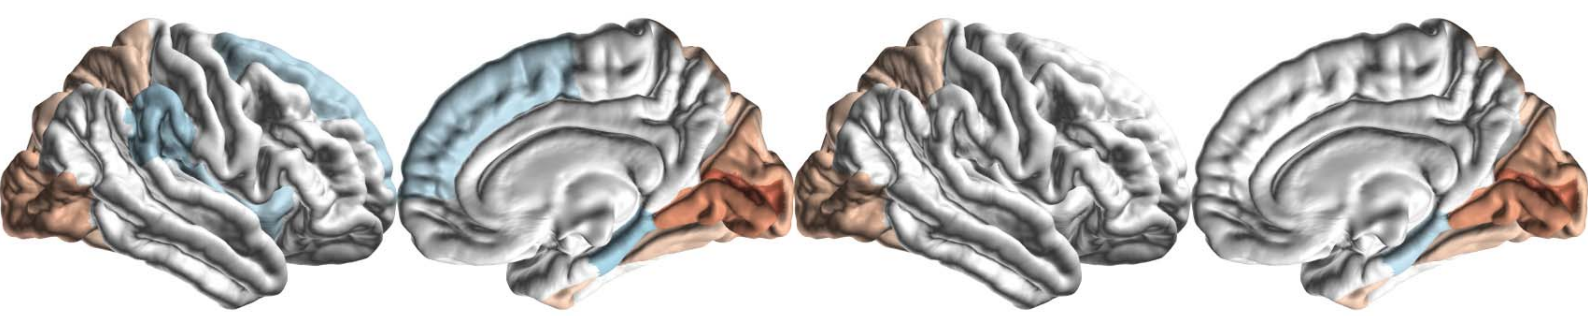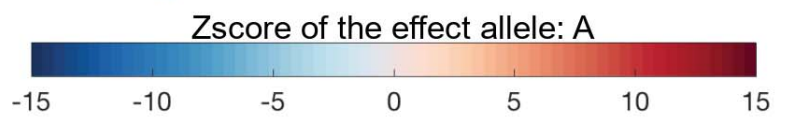

# Lingual SA: rs10431624

Chromosome 14

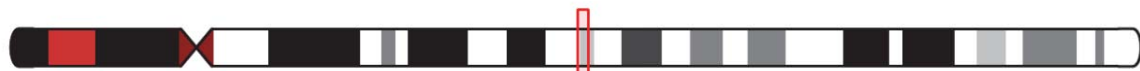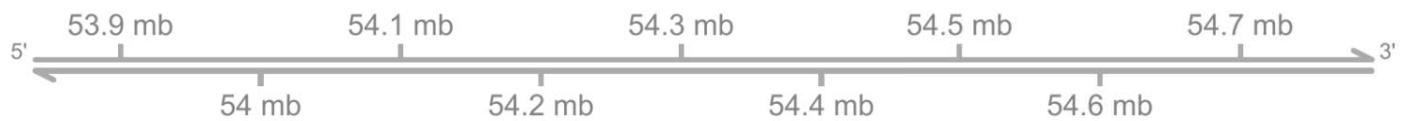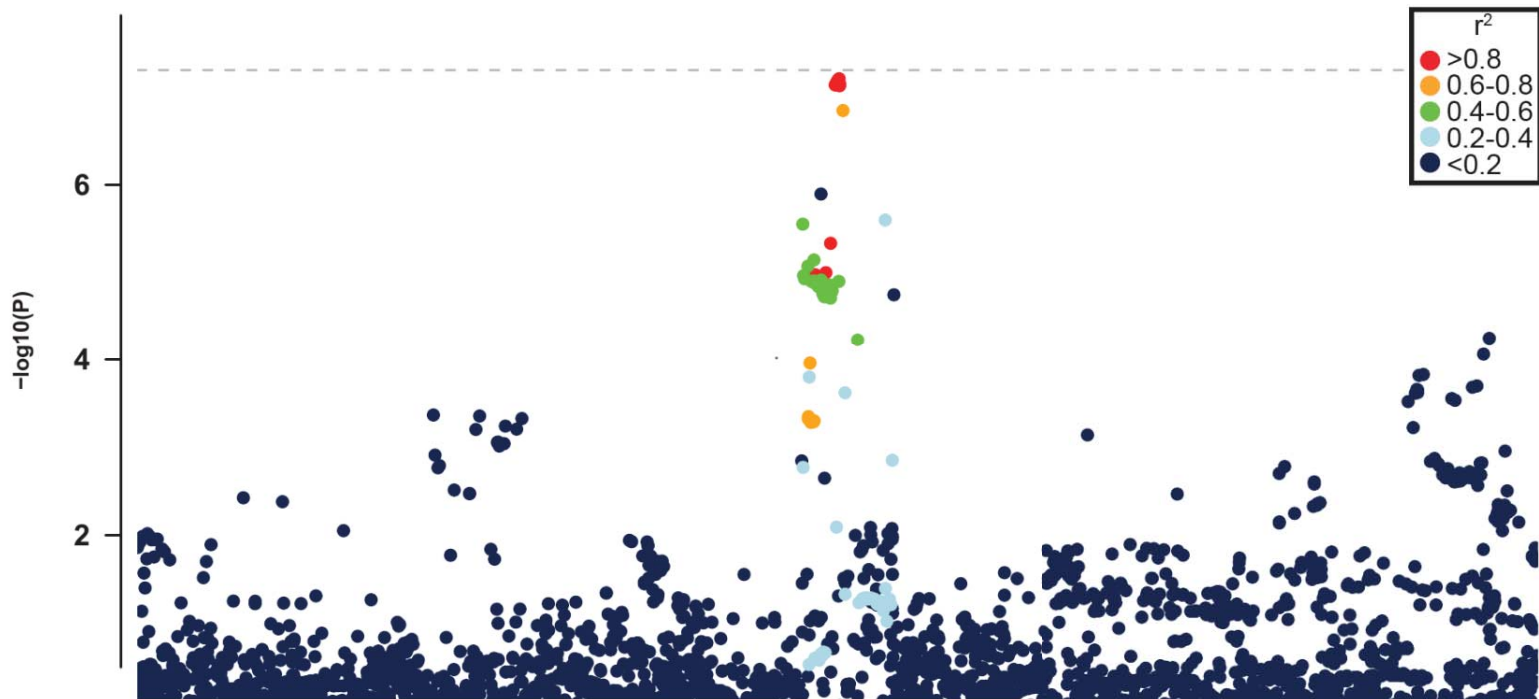

BMP4

GZ>CP

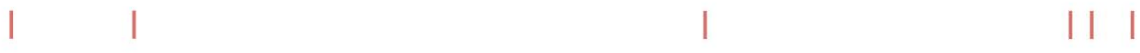

CP>GZ

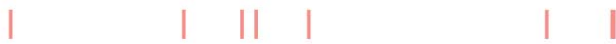

Corrected for total SA

Uncorrected

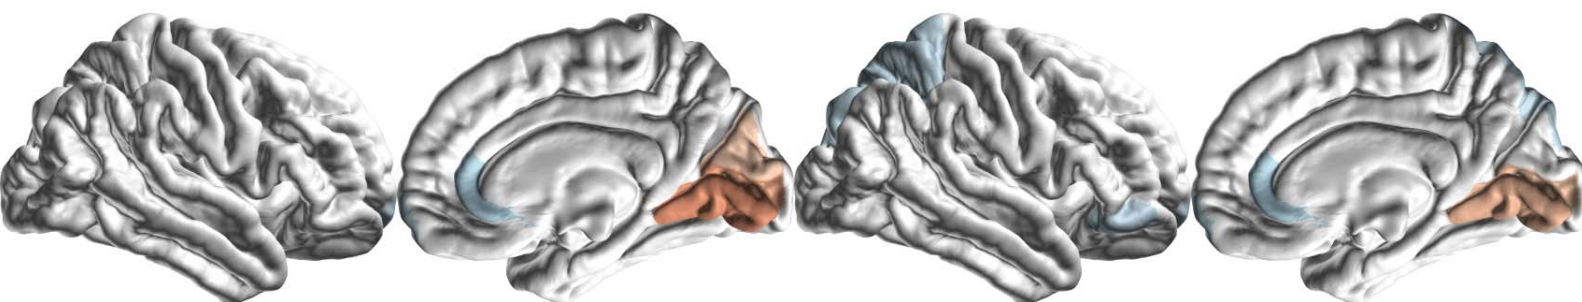

Zscore of the effect allele: T



# Lingual SA: rs74826997

Chromosome 14

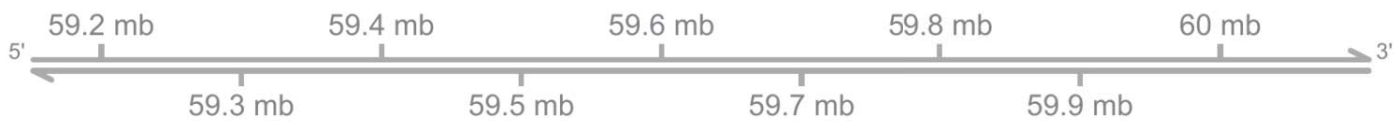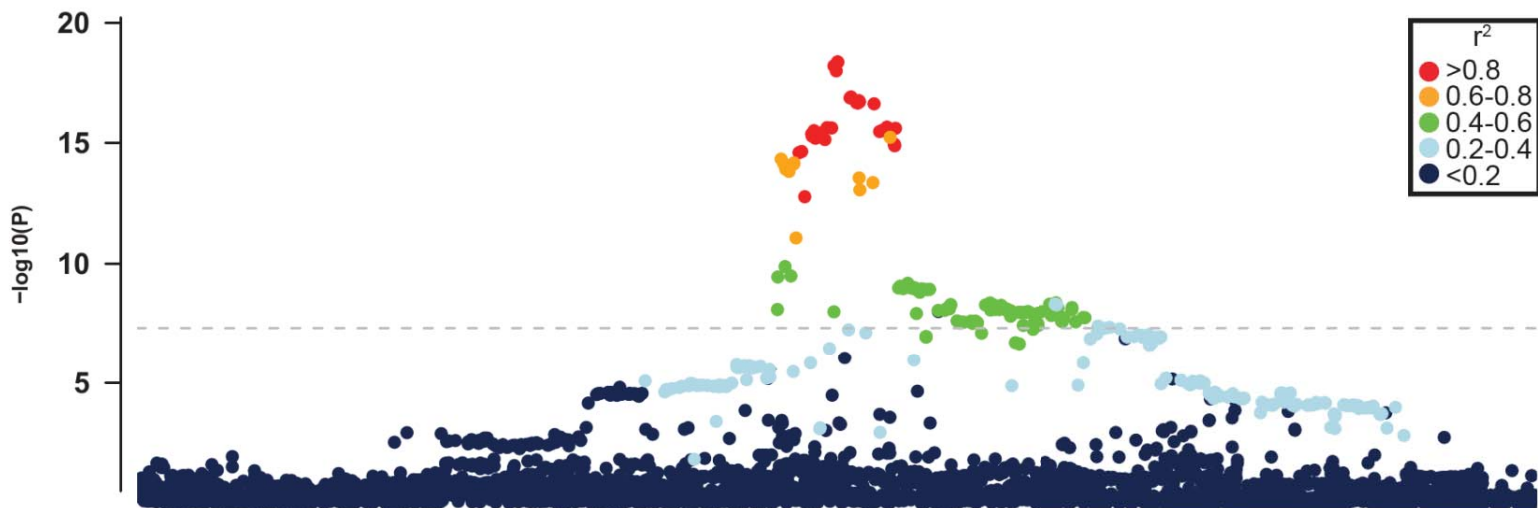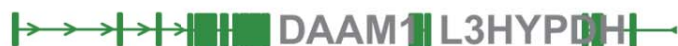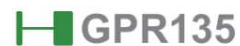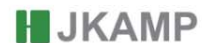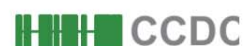

CP>GZ  
GZ>CP

Corrected for total SA

Uncorrected

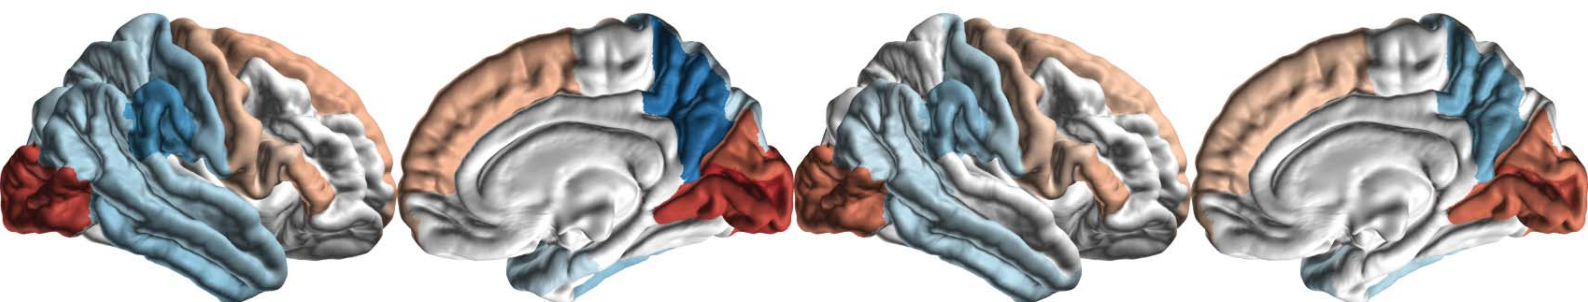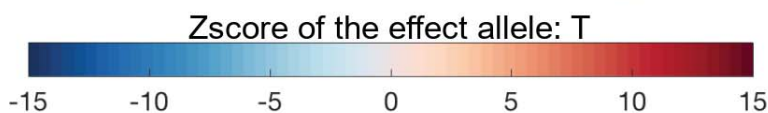



# Lingual SA: rs17690987

Chromosome 17

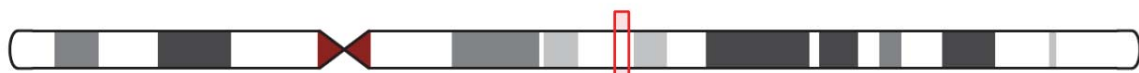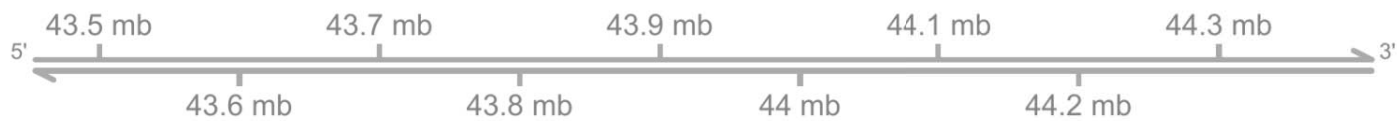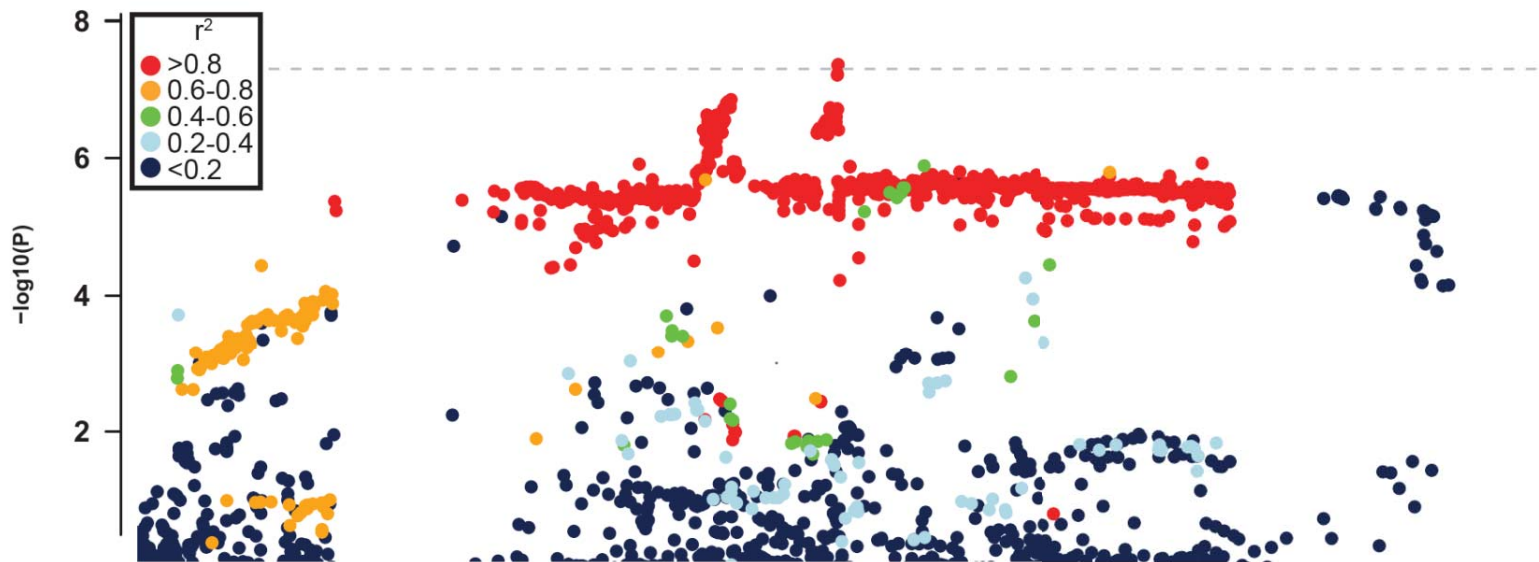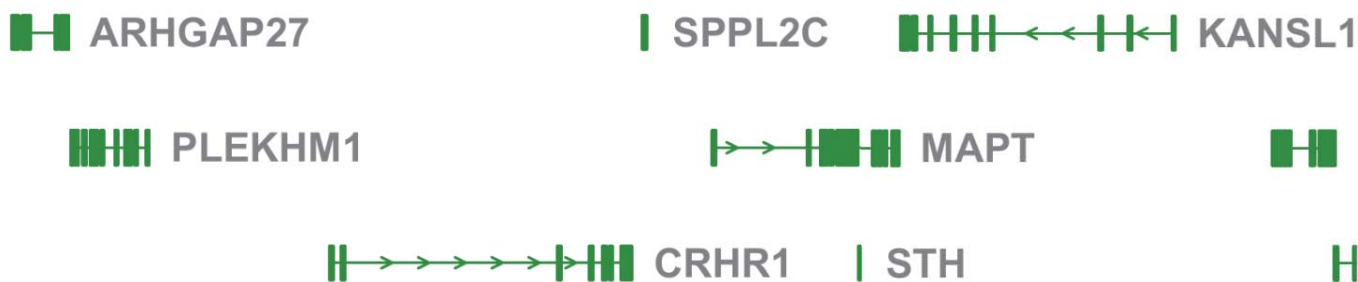

GZ>CP  
CP>GZ

Corrected for total SA

Uncorrected

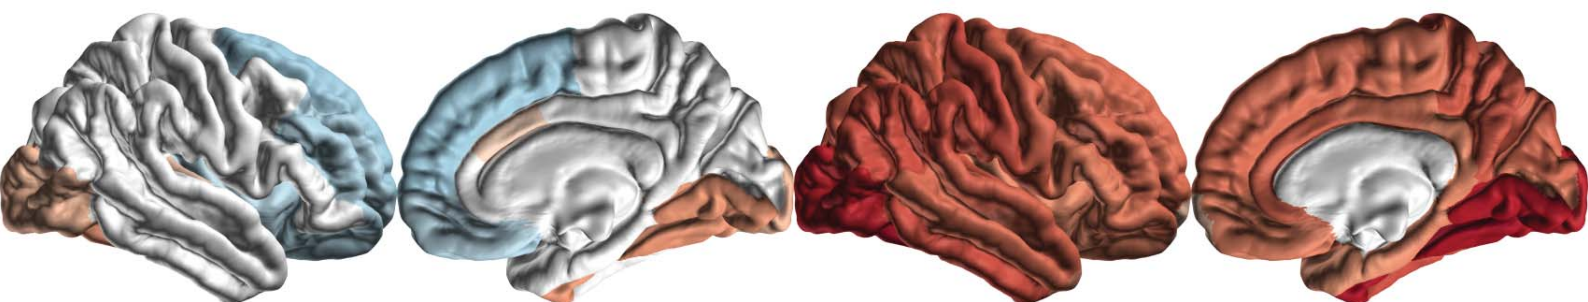

Zscore of the effect allele: T



# Lingual TH: rs10495963

Chromosome 2

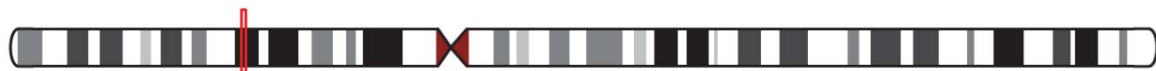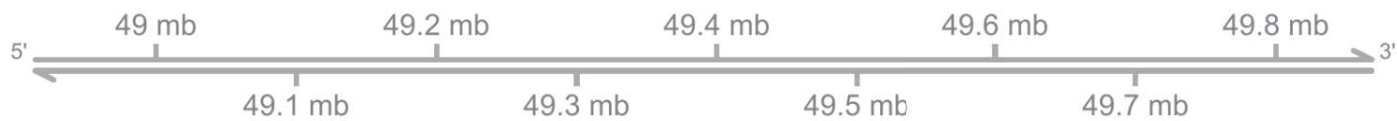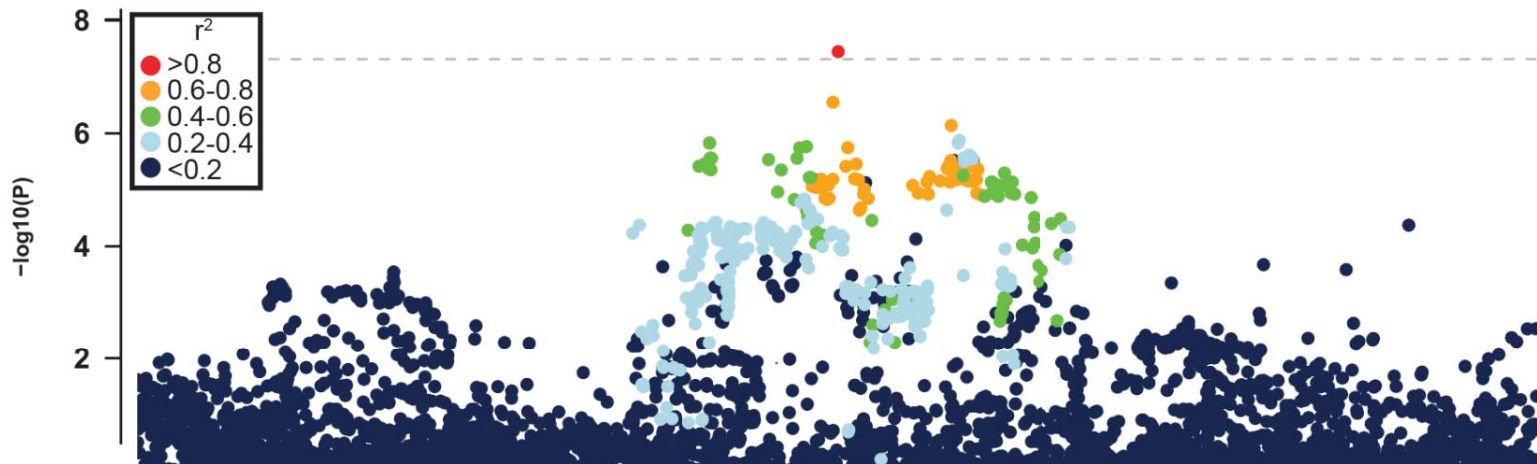

STON1-GTF2A1L

GTF2A1L

LHCGR

Angular Temporal dIPFC Cingulate

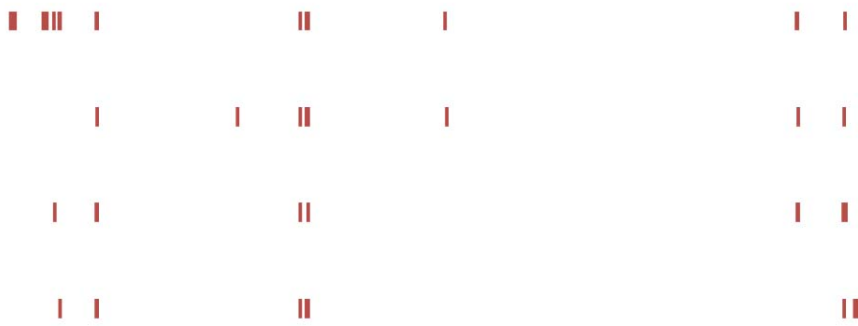

Corrected for average TH

Uncorrected

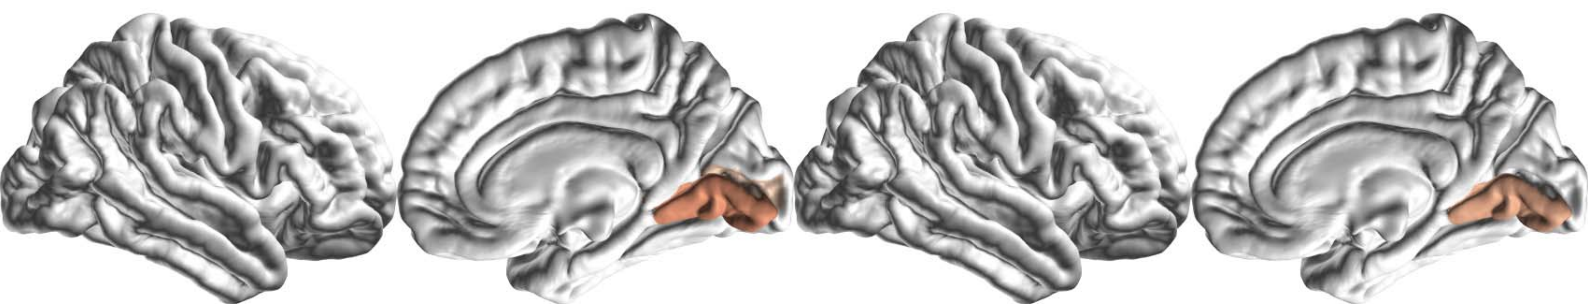

Zscore of the effect allele: T



# Pericalcarine SA: rs2999158

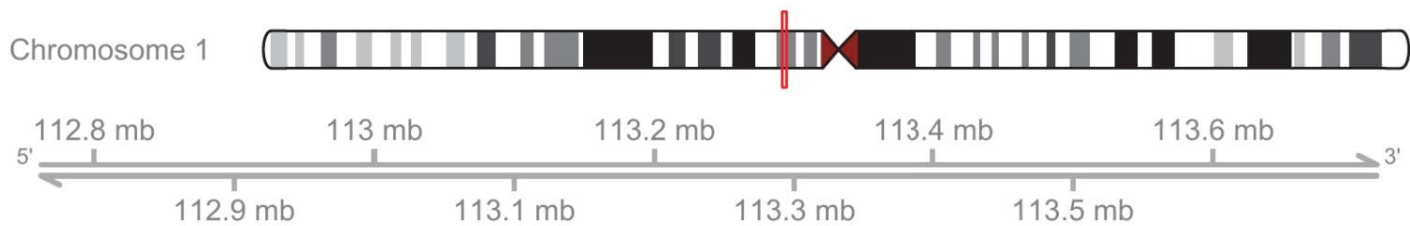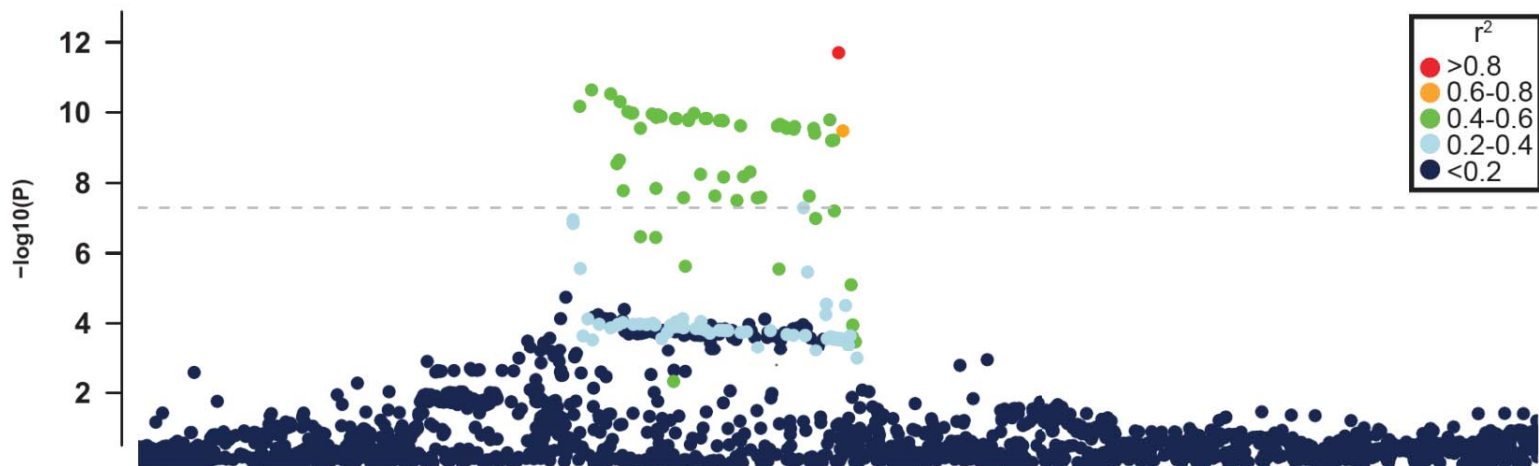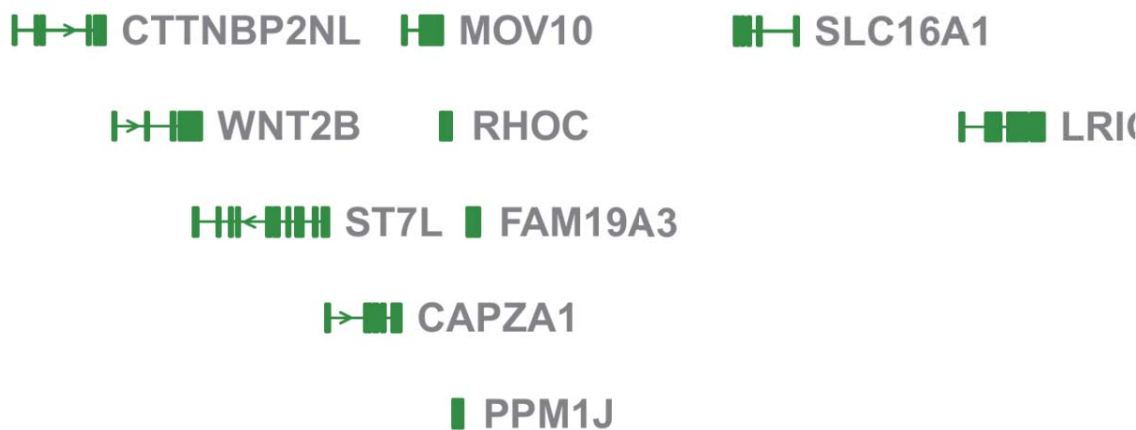

CP>GZ GZ>CP

Corrected for total SA

Uncorrected

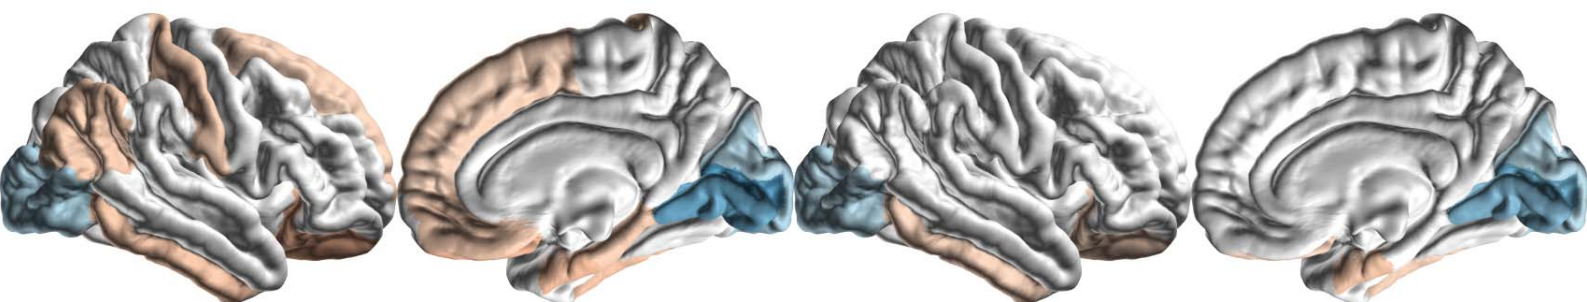

Zscore of the effect allele: T





# Pericalcarine SA: rs16822665

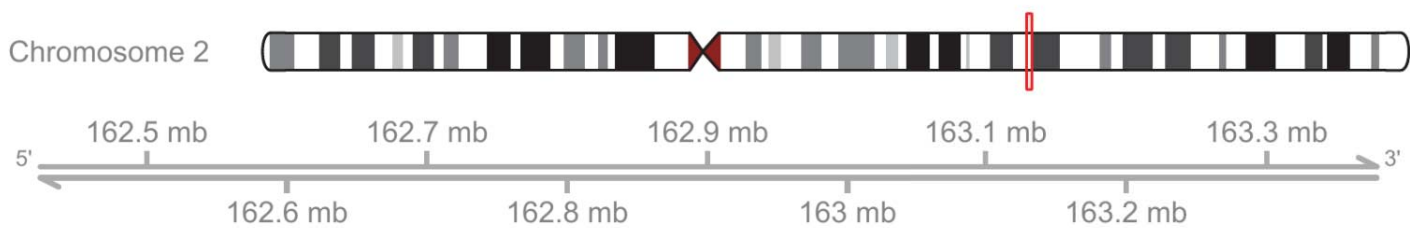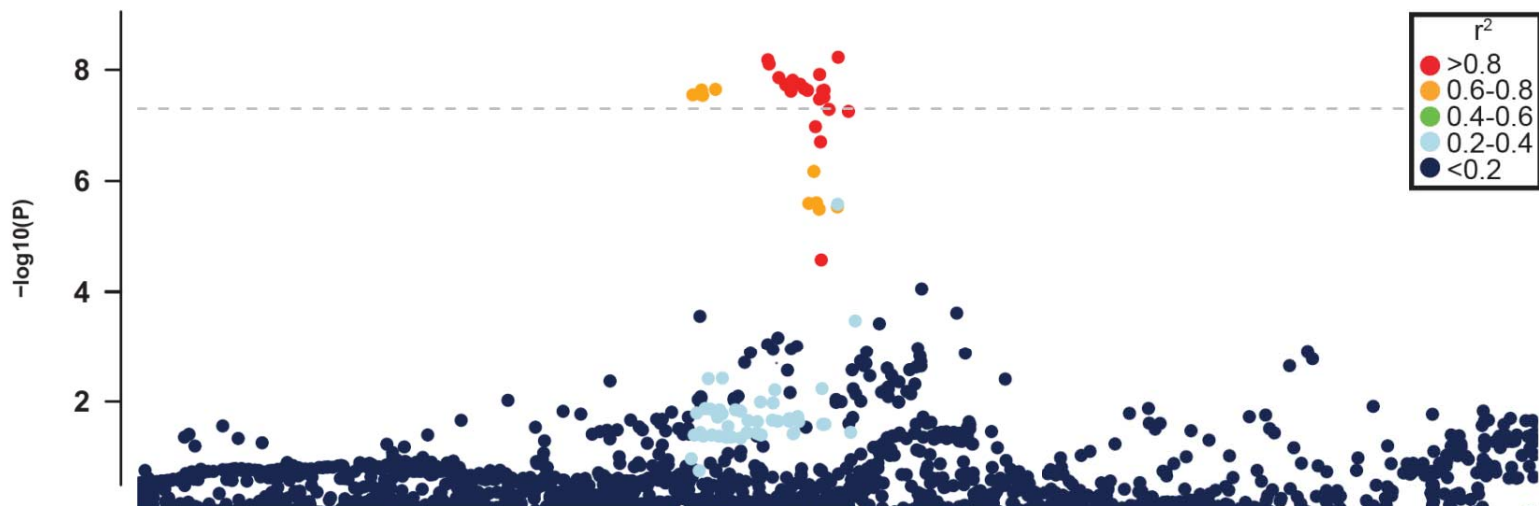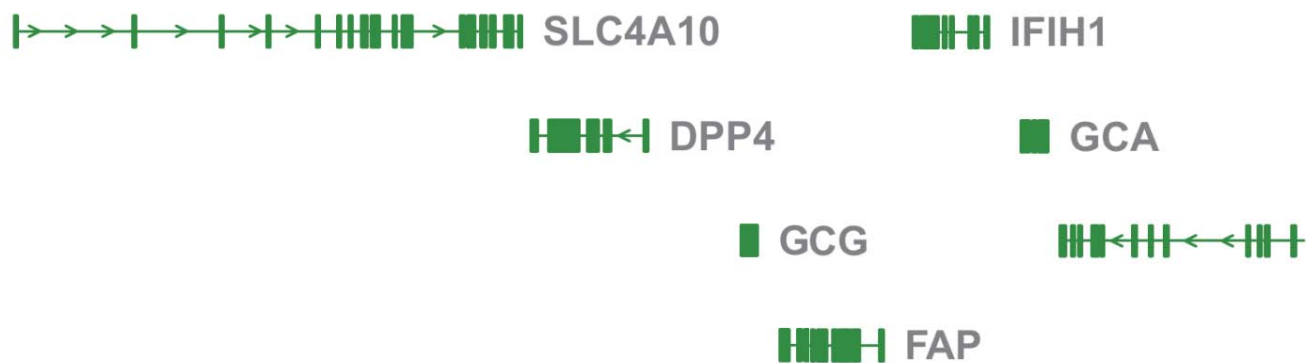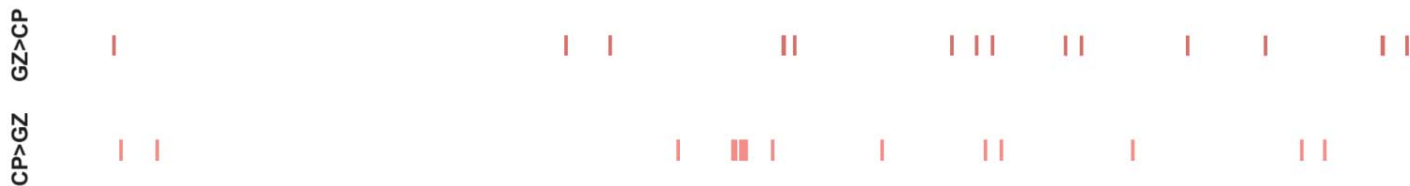

Corrected for total SA

Uncorrected

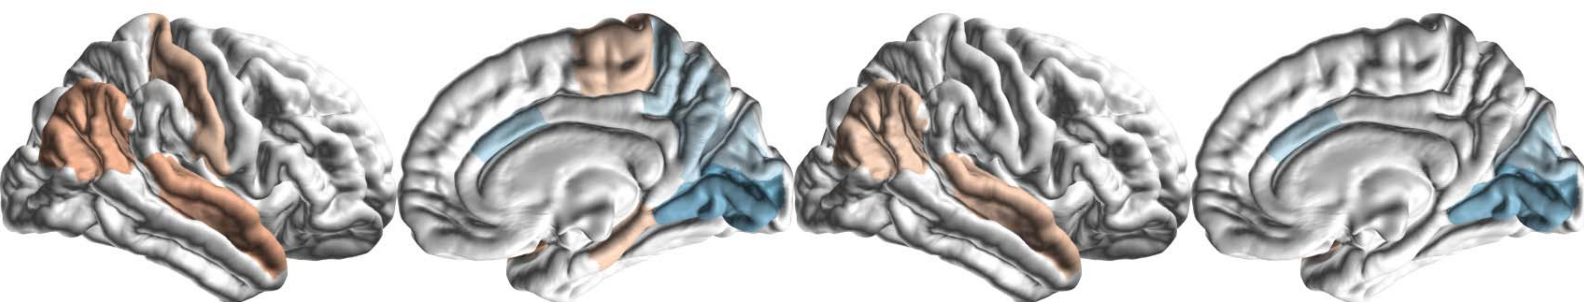

# Pericalcarine SA: rs971550

Chromosome 3

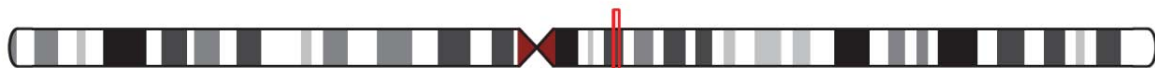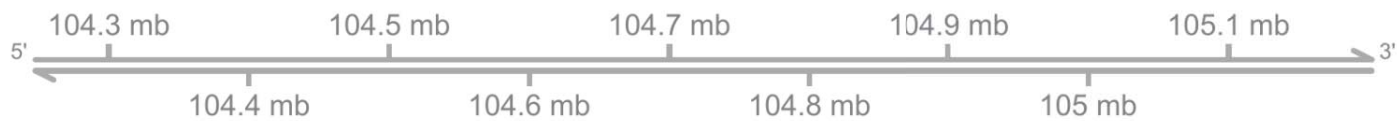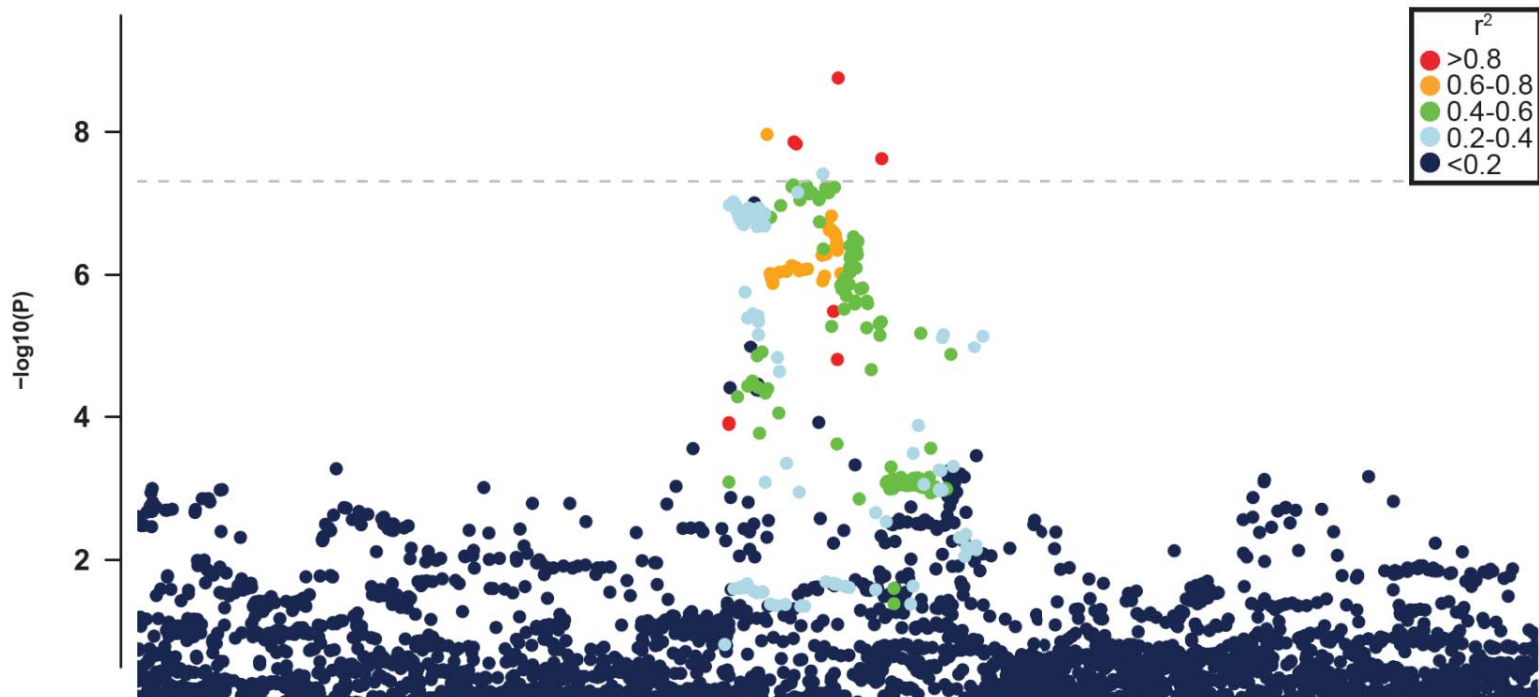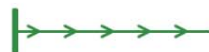

GZ>CP

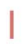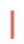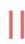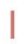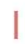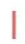

CP>GZ

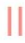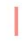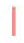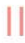

Corrected for total SA

Uncorrected

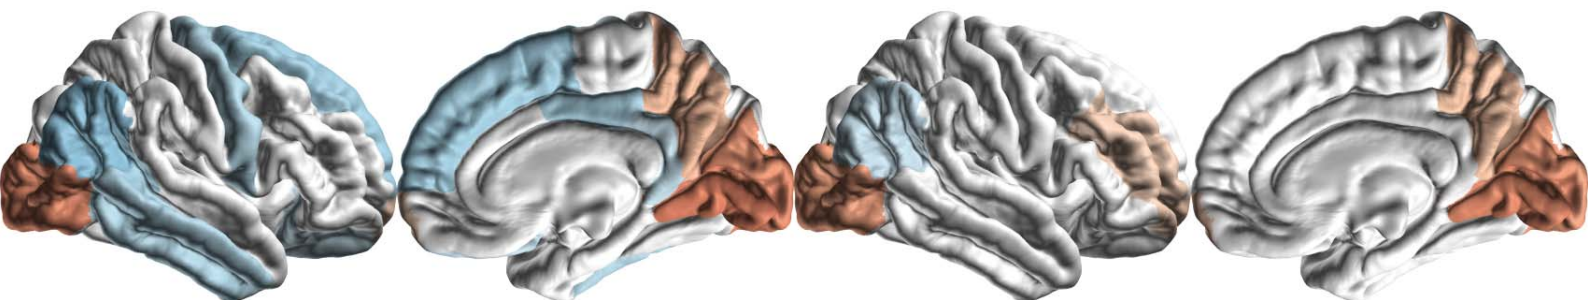

Zscore of the effect allele: A



# Pericalcarine SA: rs139834736

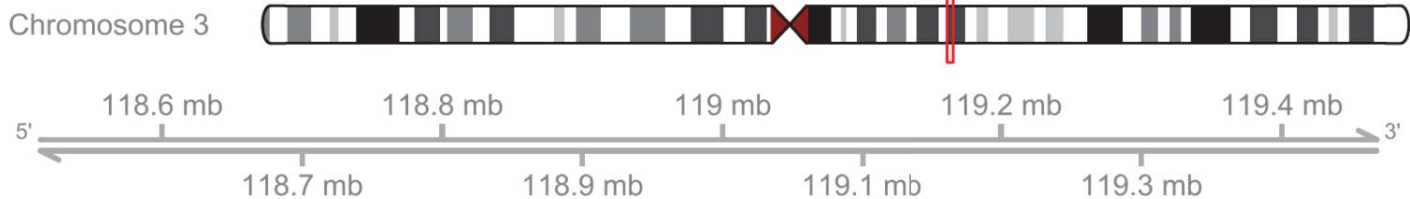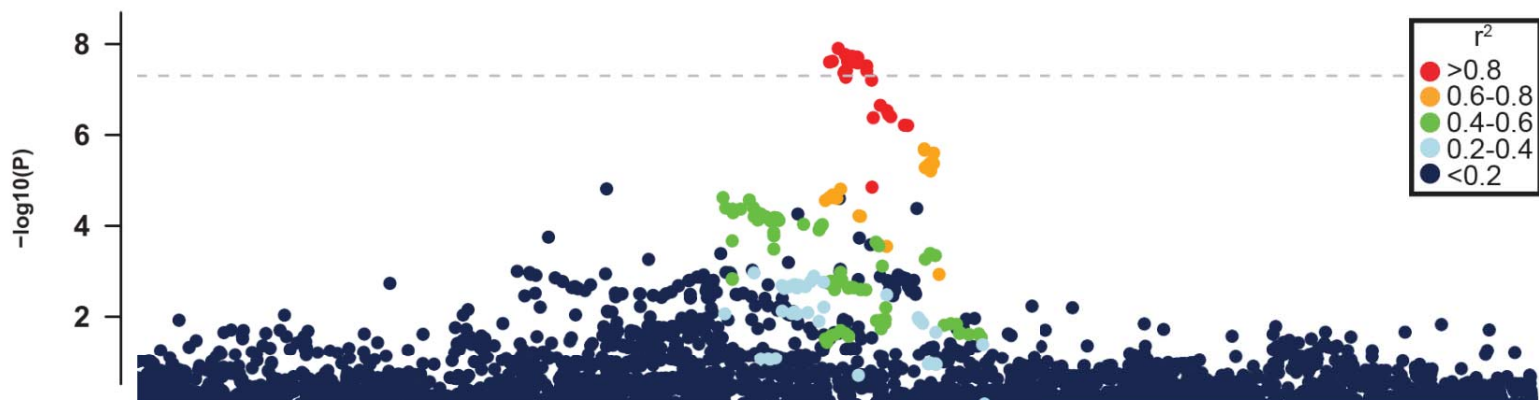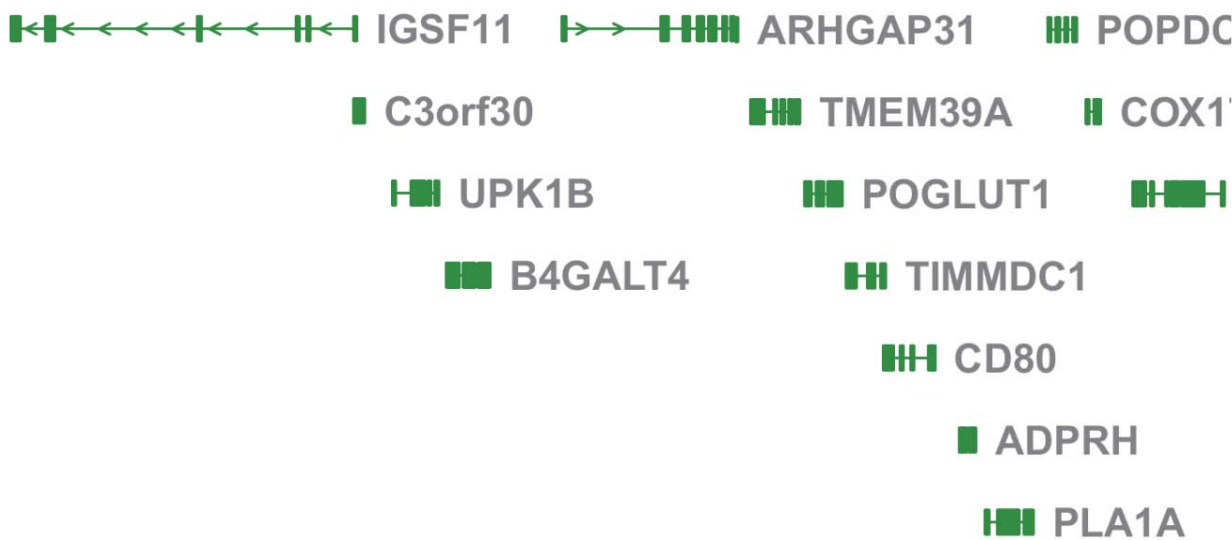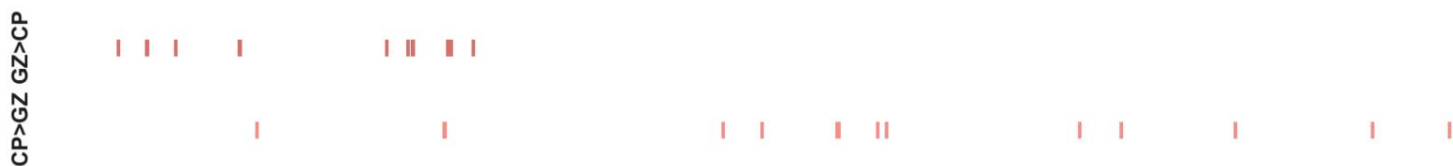

Corrected for total SA

Uncorrected

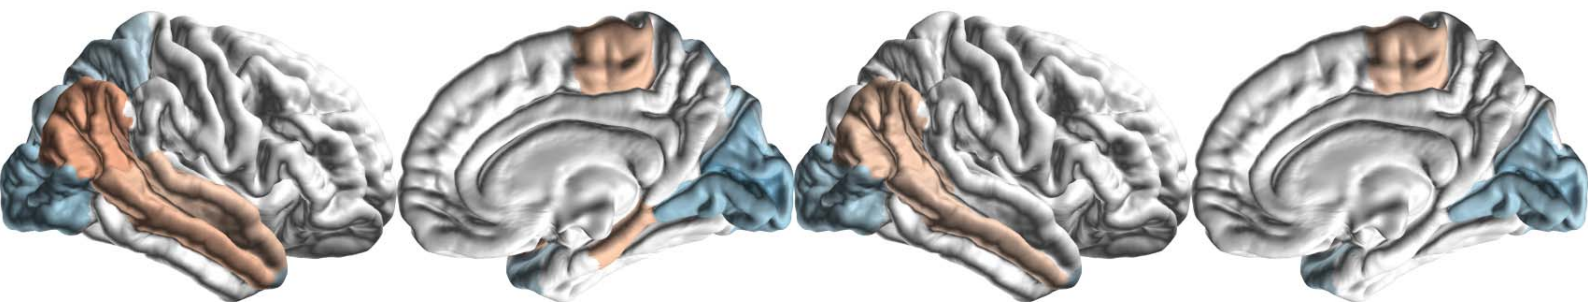

Zscore of the effect allele: A

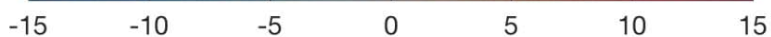



# Pericalcarine SA: rs6812278

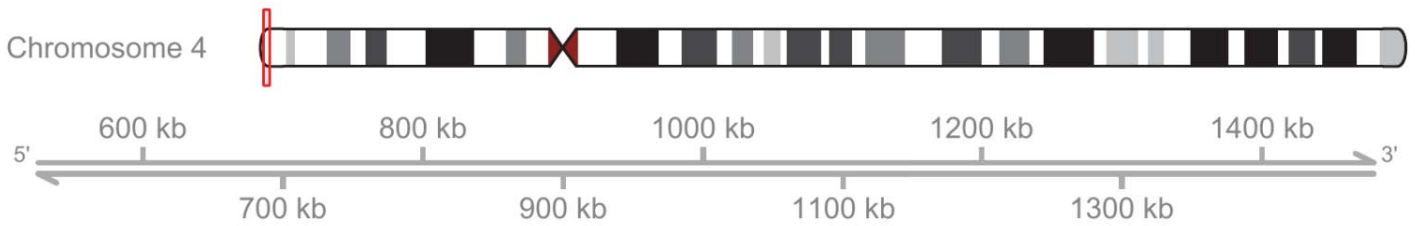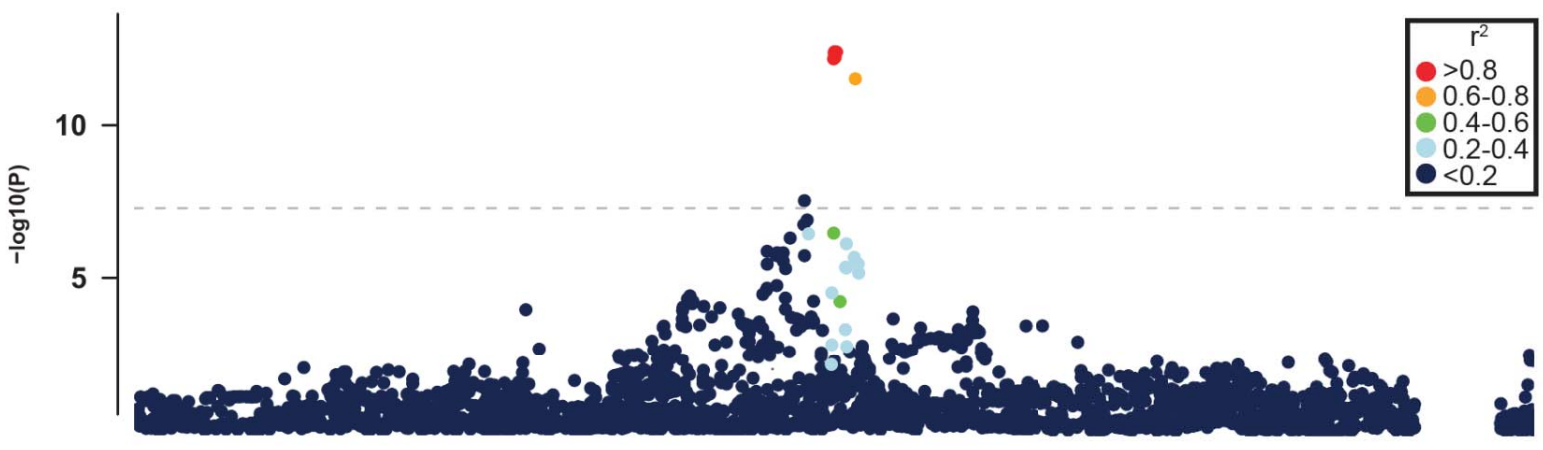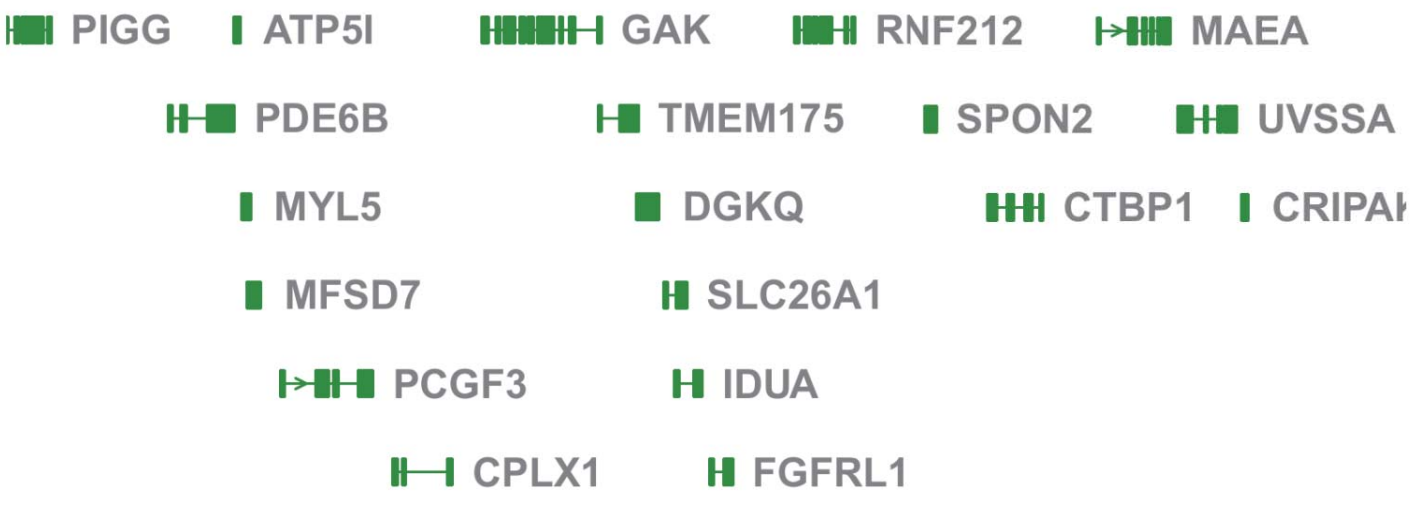

CP>GZ GZ>CP

Corrected for total SA

Uncorrected

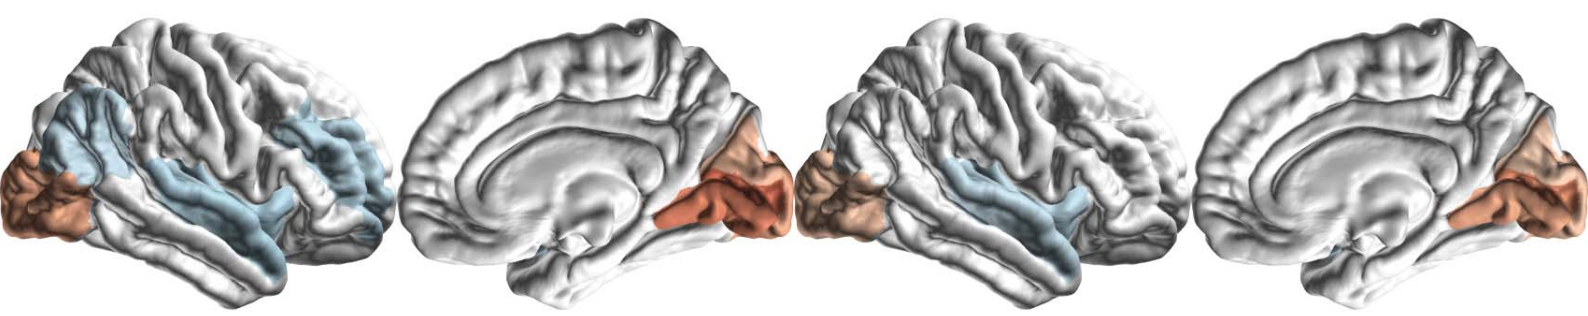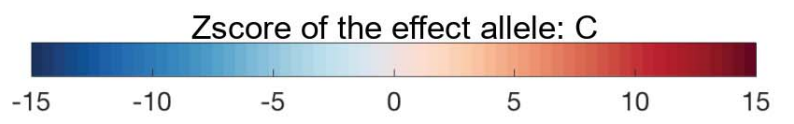

### Pericalcarine SA: rs13115025

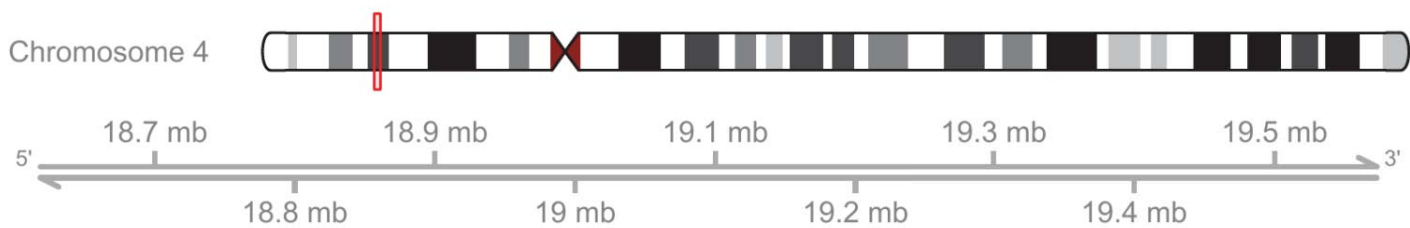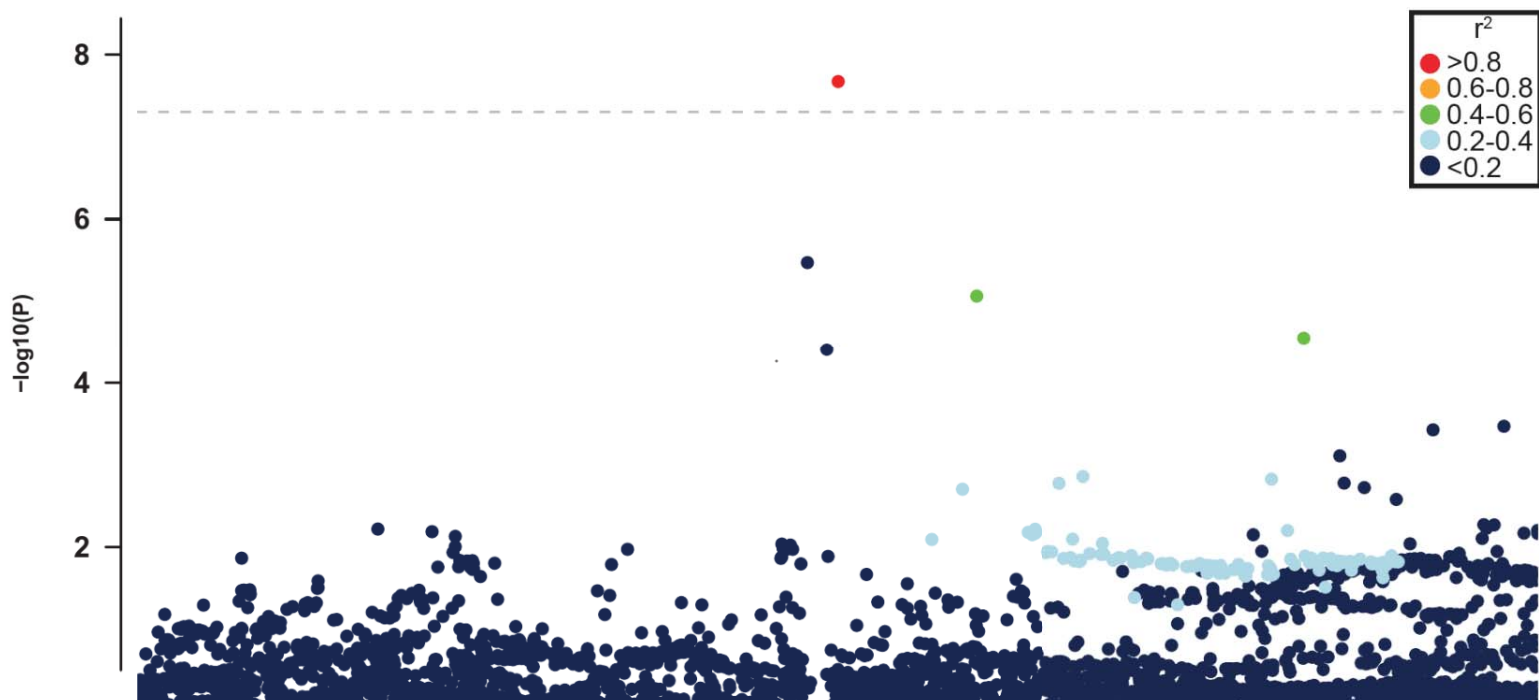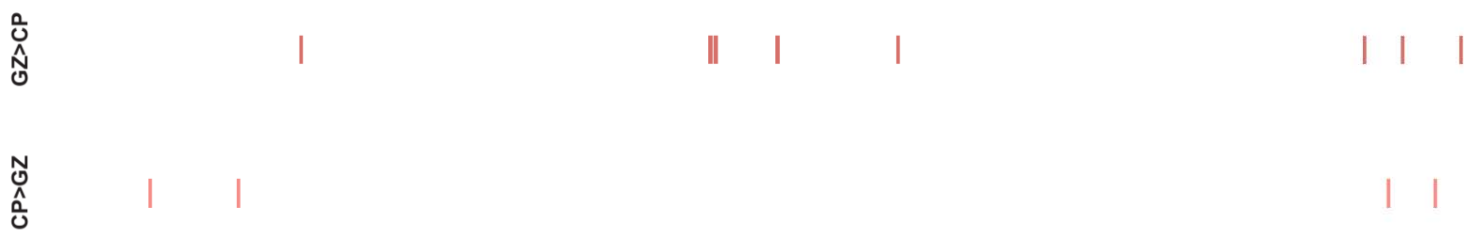

Corrected for total SA

Uncorrected

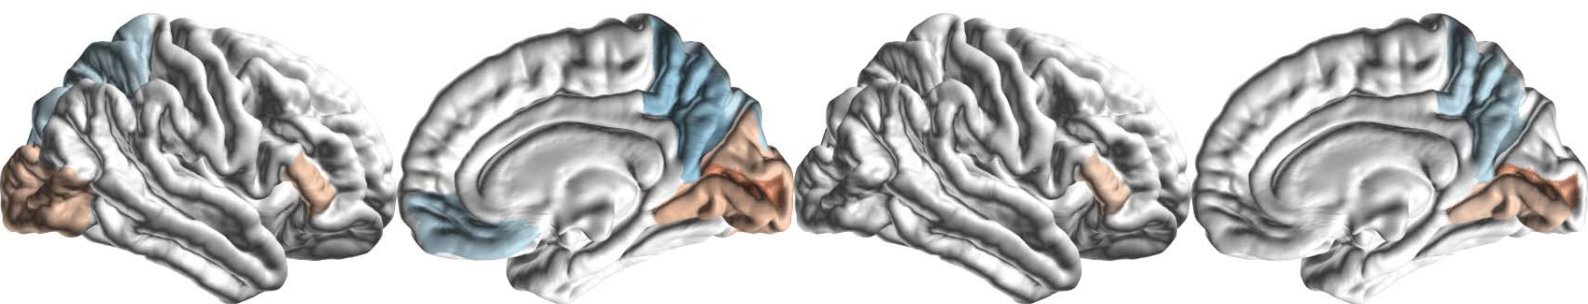

# Pericalcarine SA: rs4465995

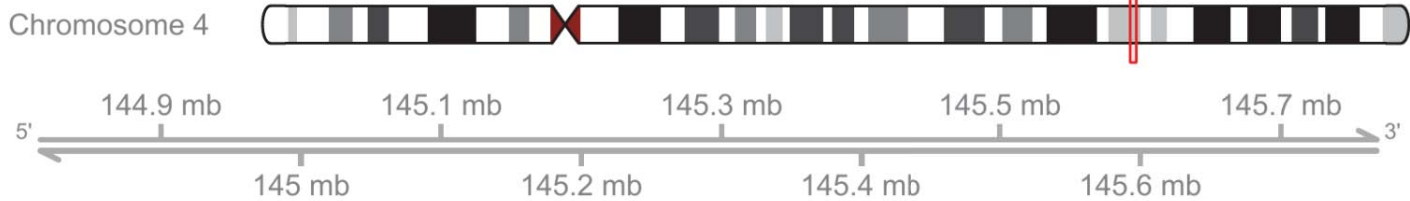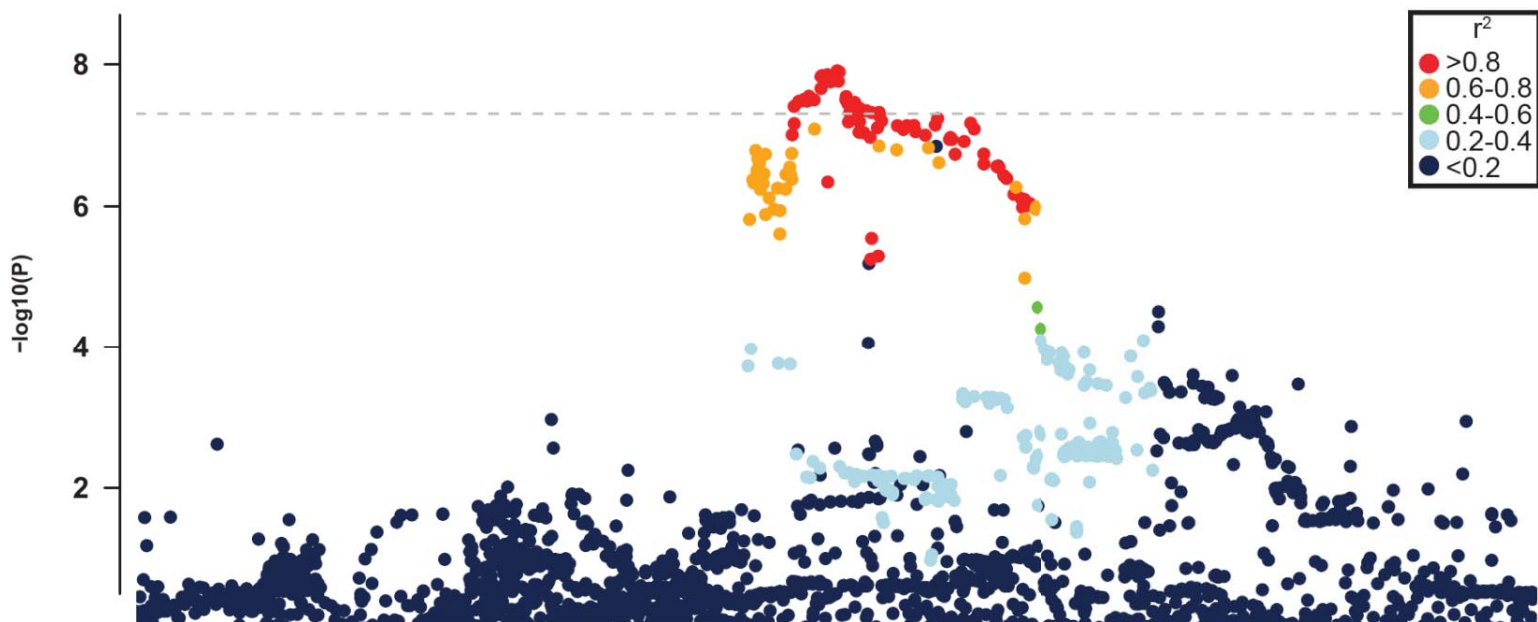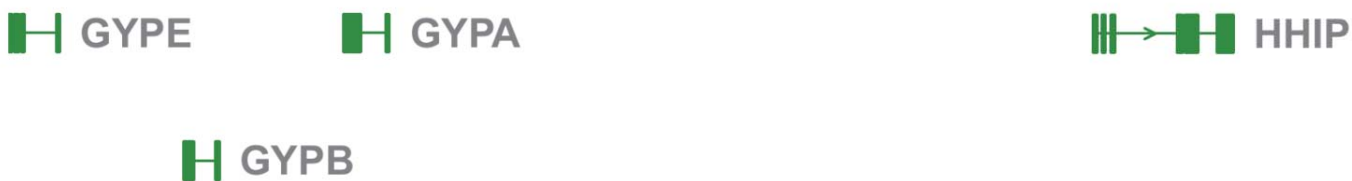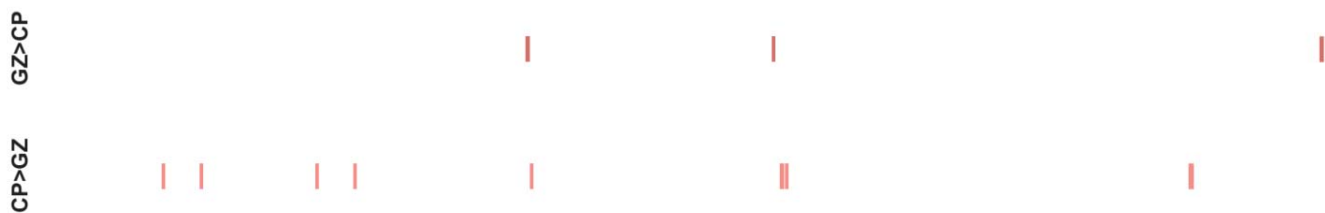

Corrected for total SA

Uncorrected

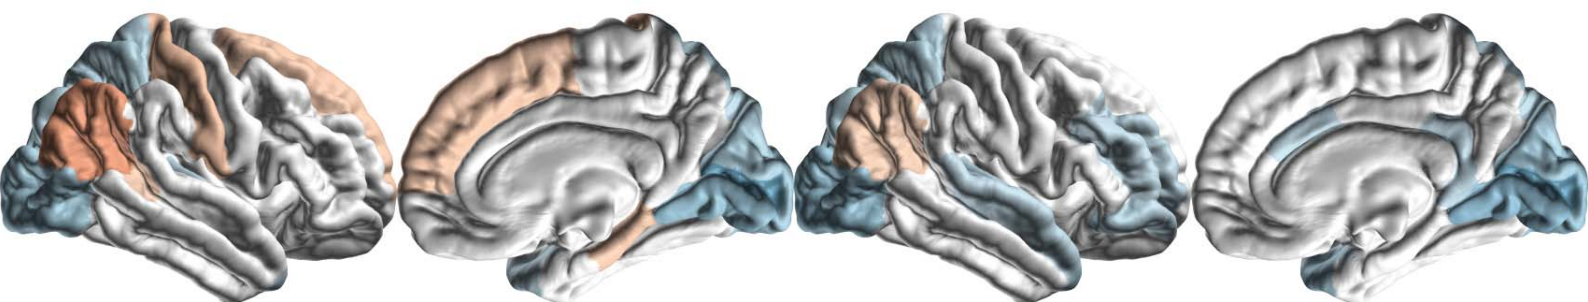

Zscore of the effect allele: T





# Pericalcarine SA: rs194369

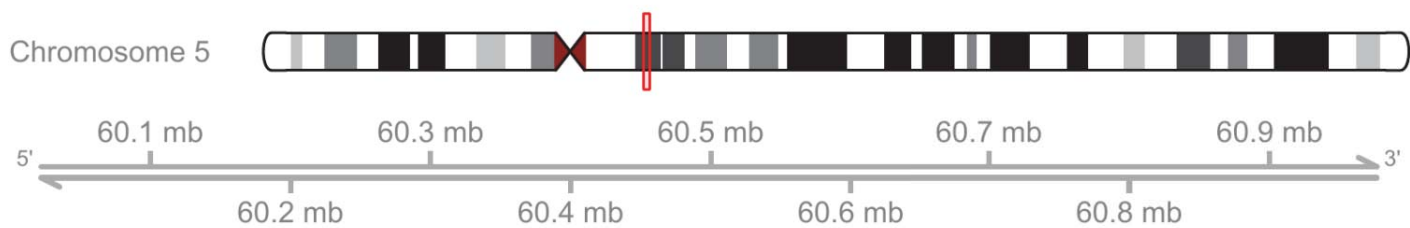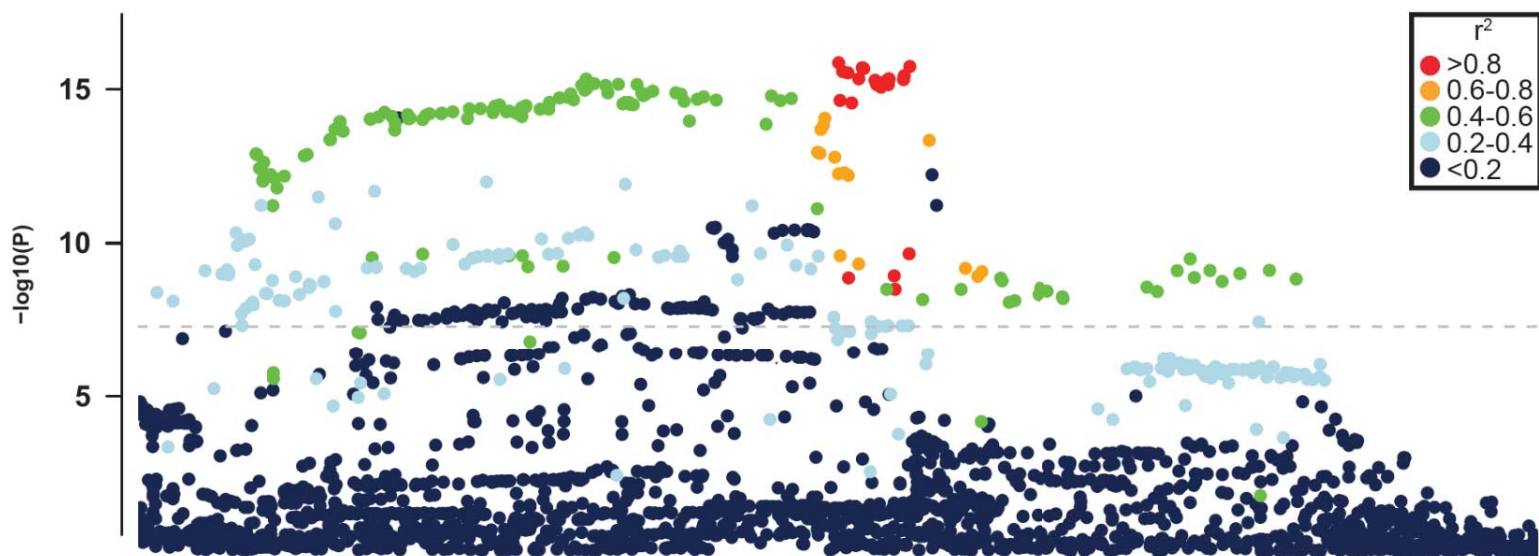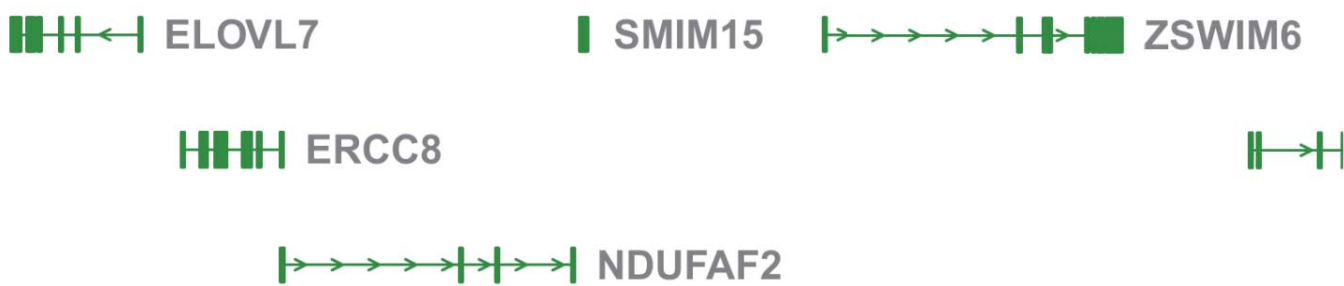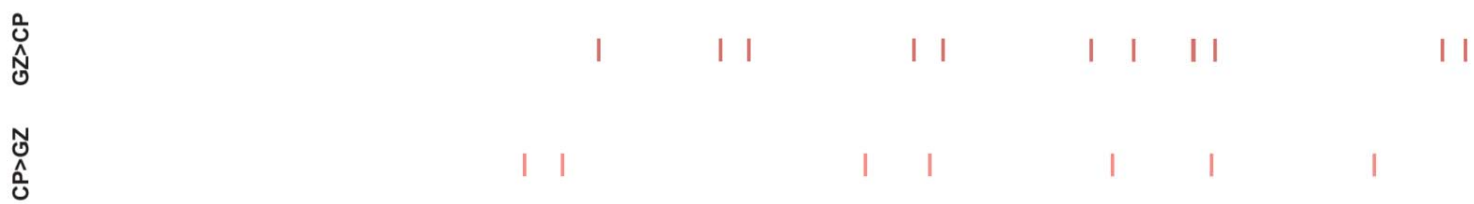

Corrected for total SA

Uncorrected

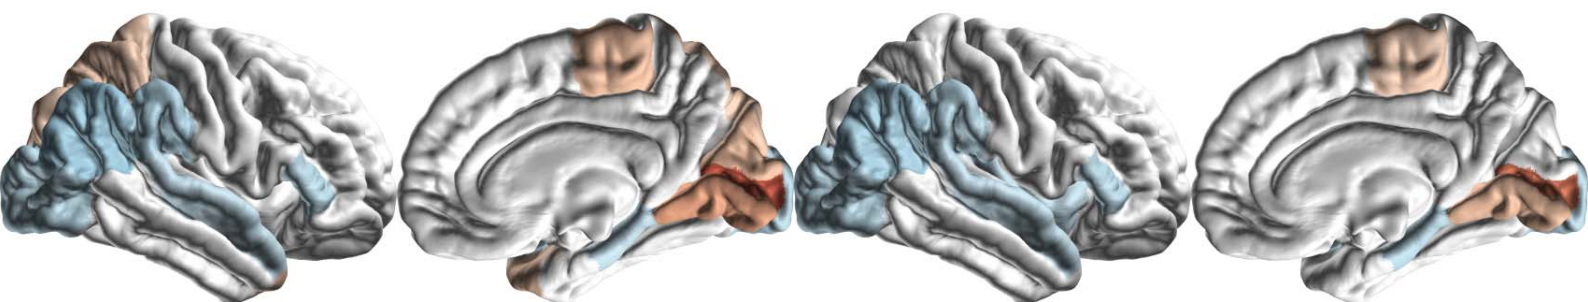

# Pericalcarine SA: rs57063427

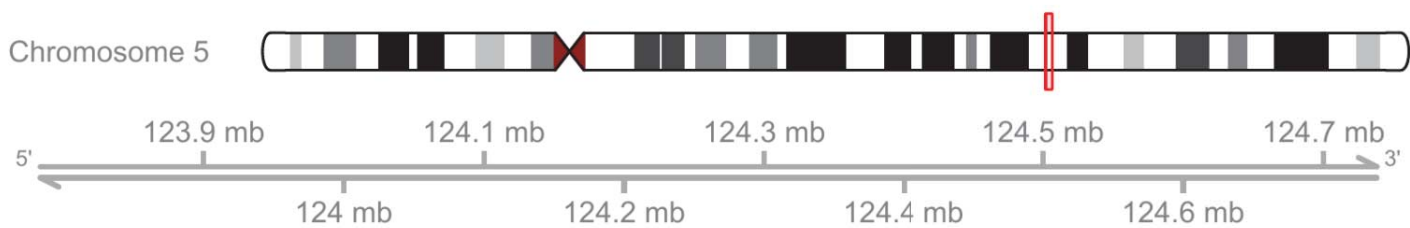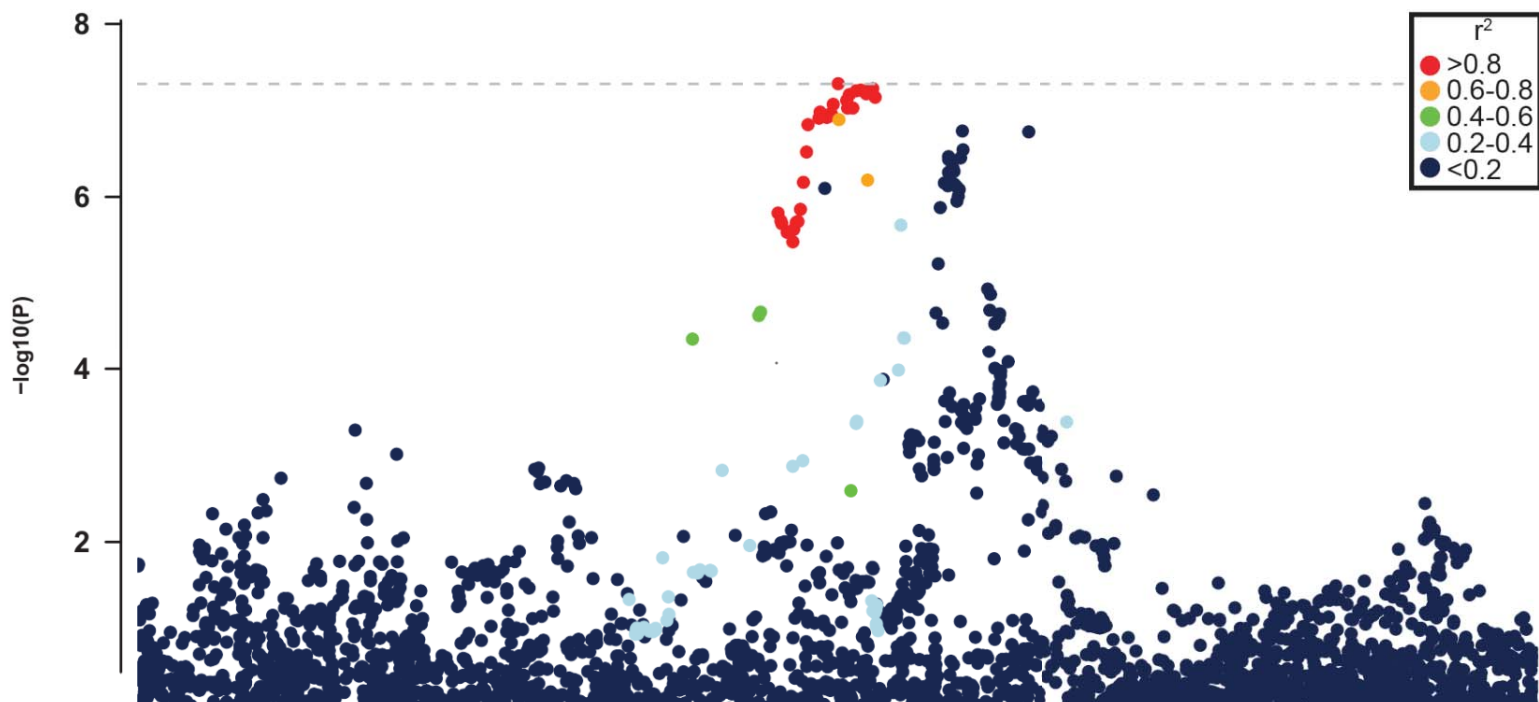

ZNF608

GZ>CP

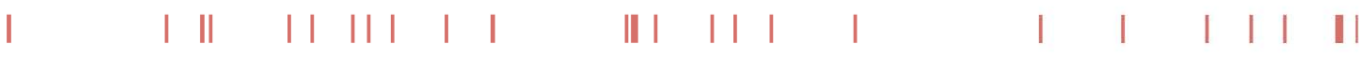

CP>GZ

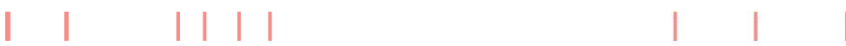

Corrected for total SA

Uncorrected

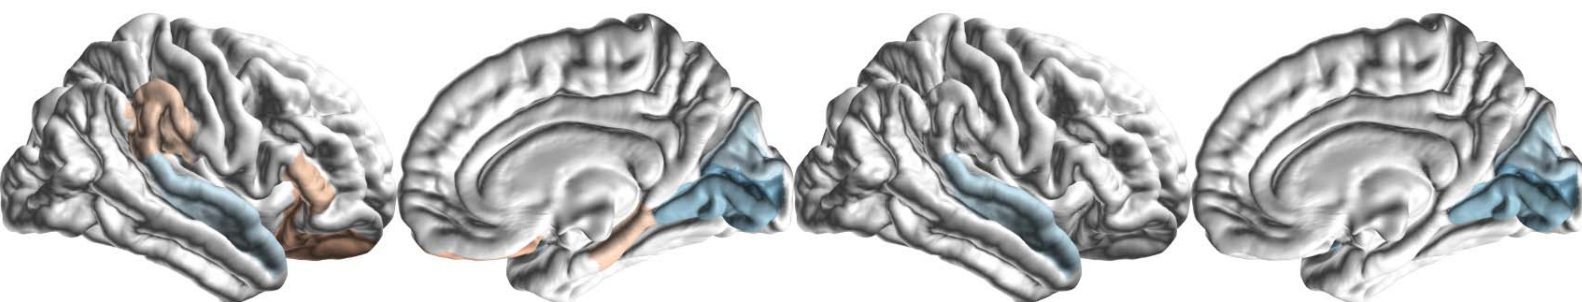

Zscore of the effect allele: T



# Pericalcarine SA: rs117892760

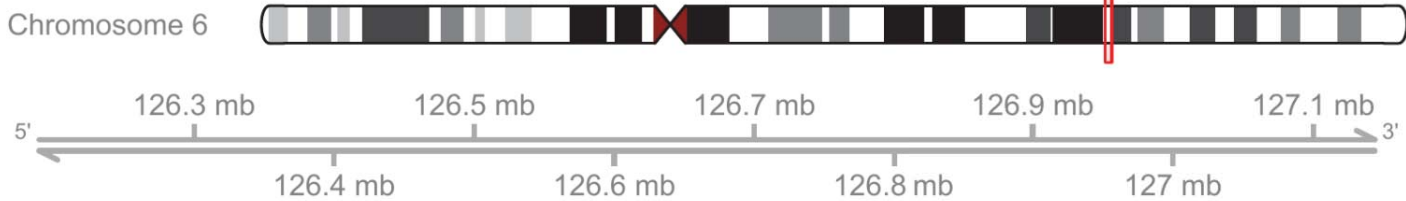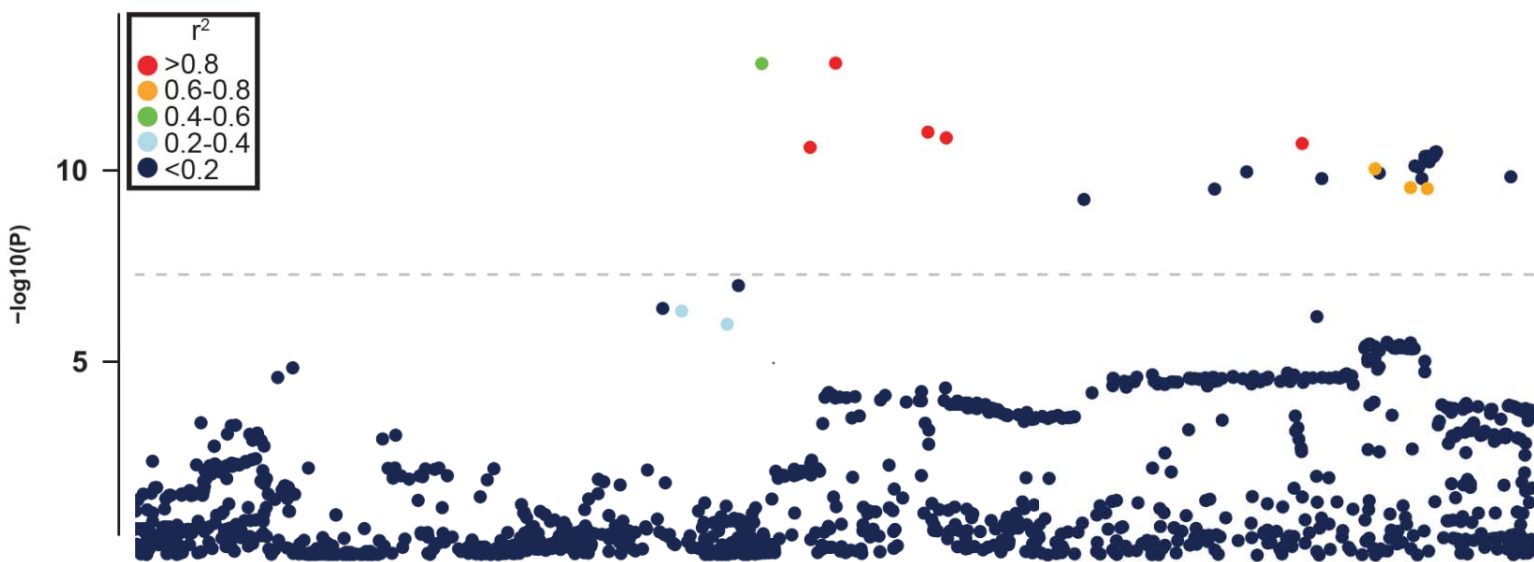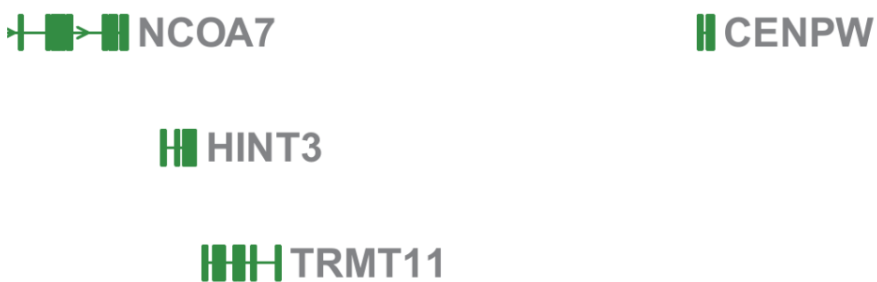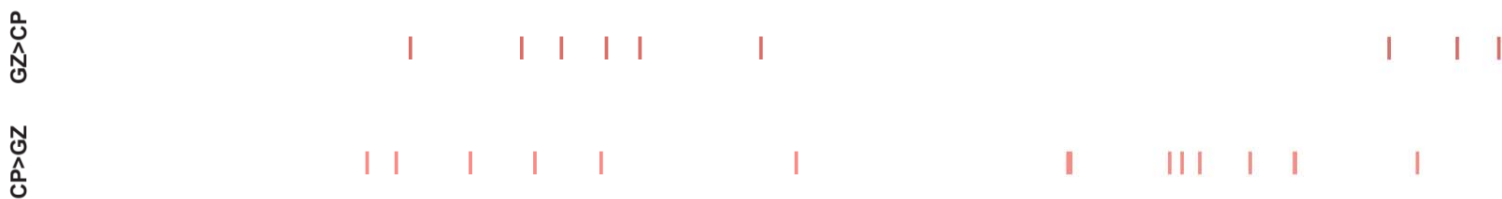

Corrected for total SA

Uncorrected

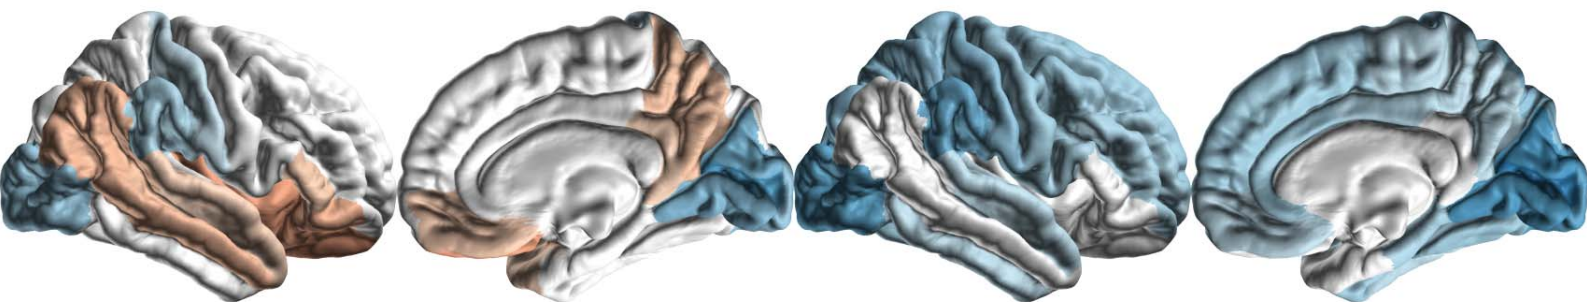



# Pericalcarine SA: rs489532

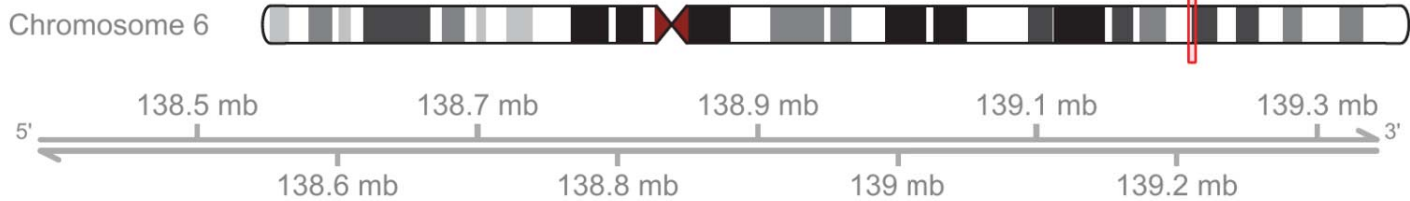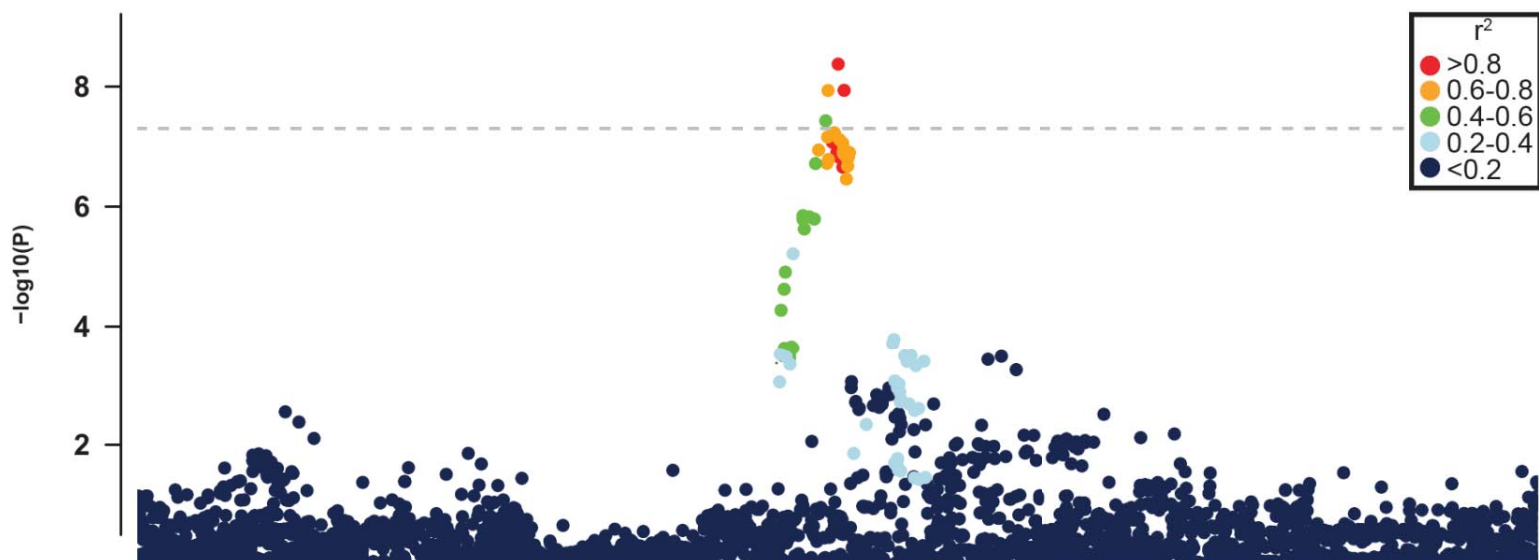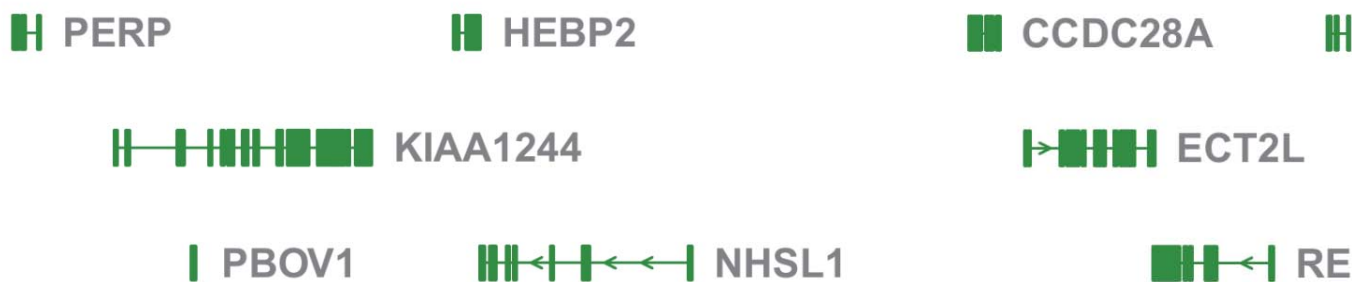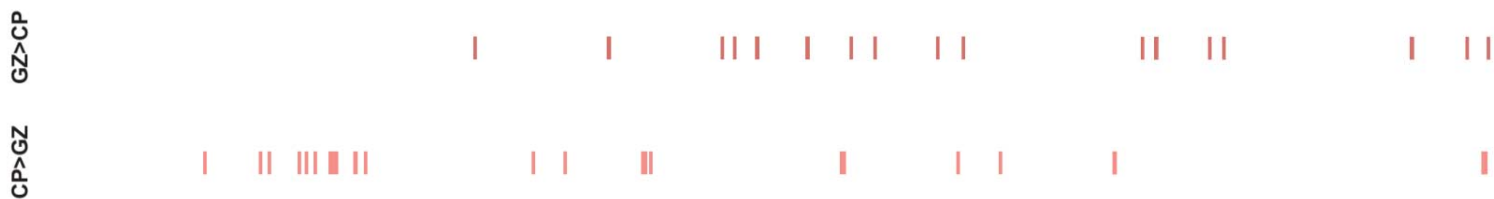

Corrected for total SA

Uncorrected

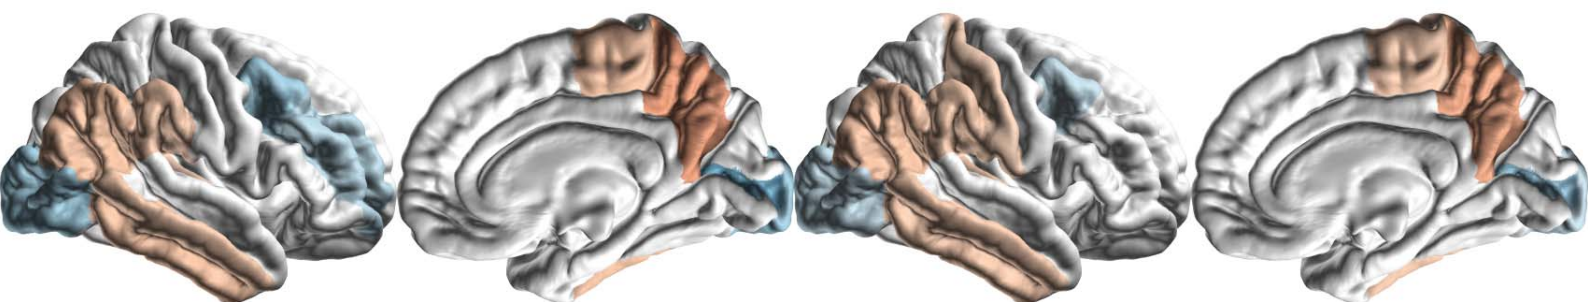

Zscore of the effect allele: T



# Pericalcarine SA: rs10237366

Chromosome 7

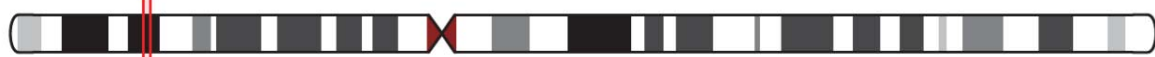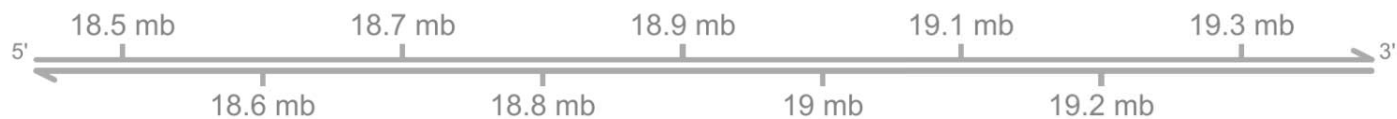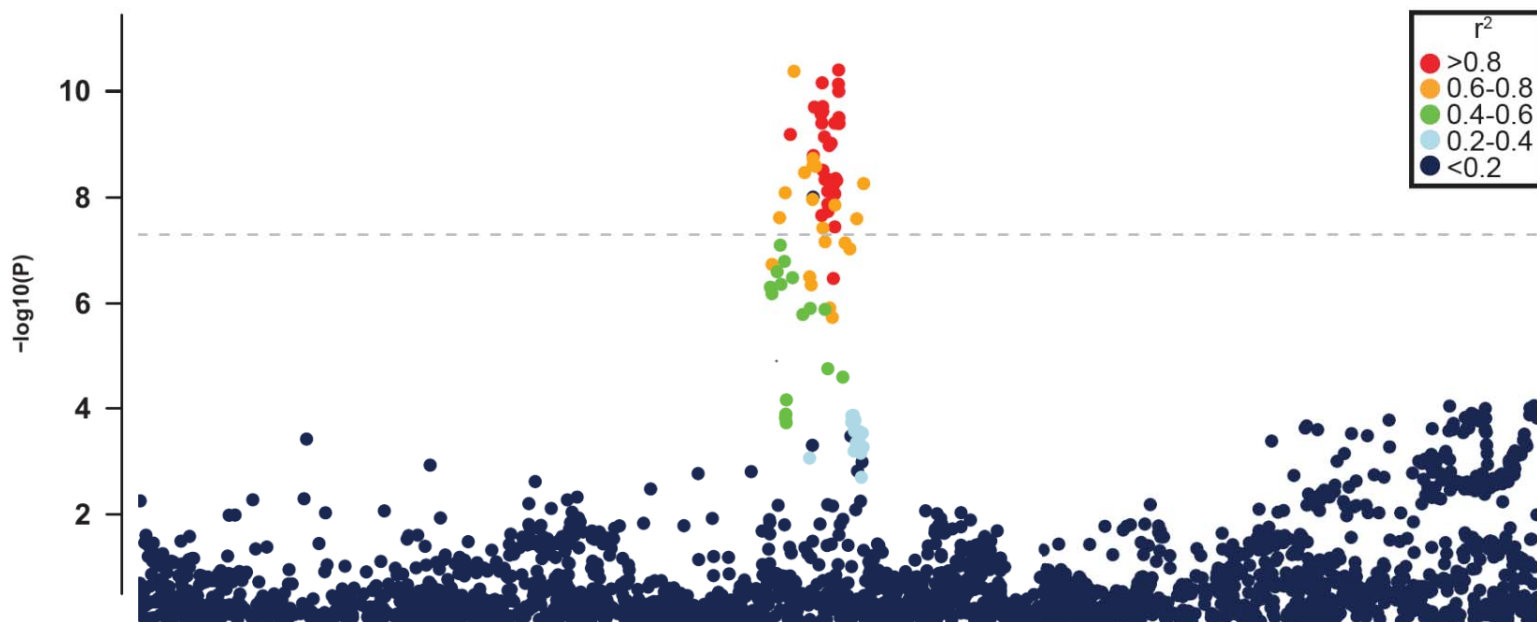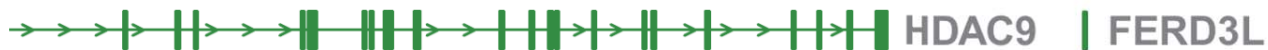

TWIST1

GZ>CP

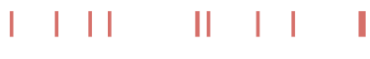

CP>GZ

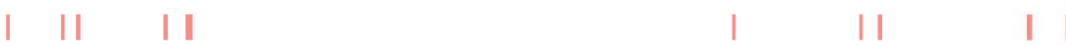

Corrected for total SA

Uncorrected



Zscore of the effect allele: C

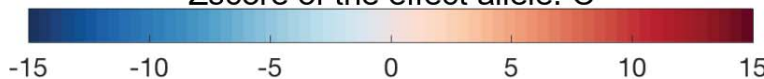

# Pericalcarine SA: rs10765918

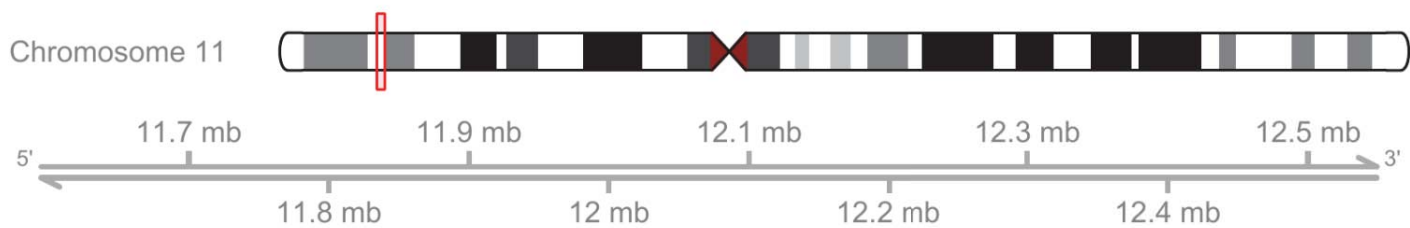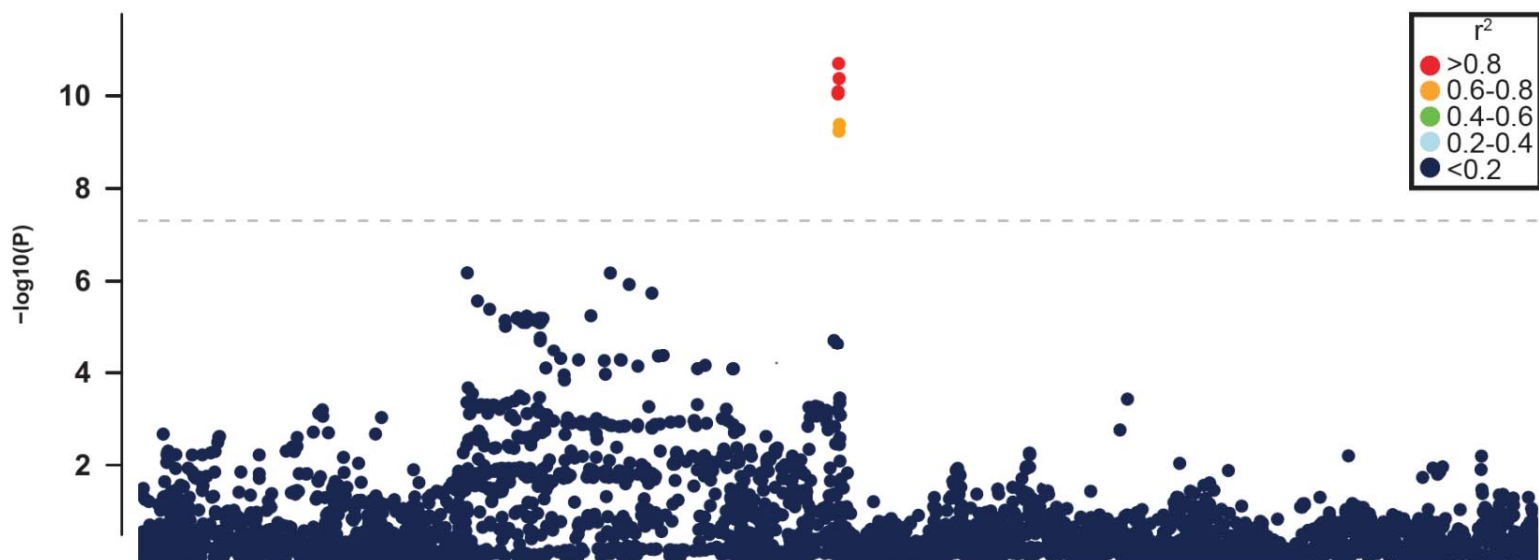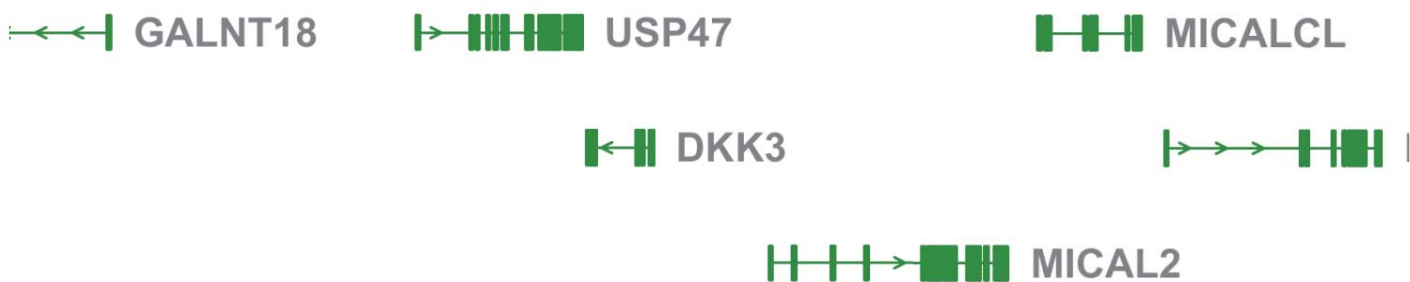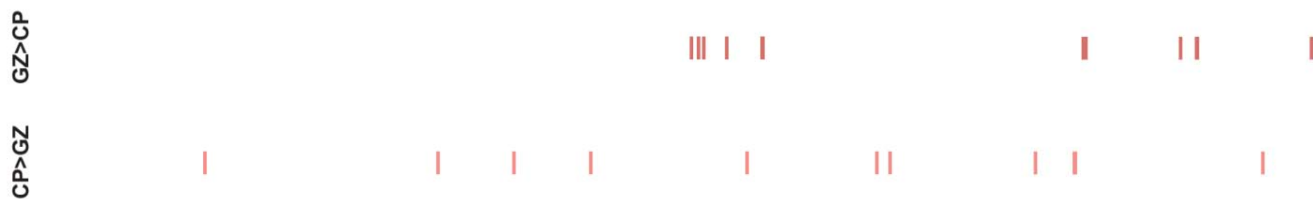

Corrected for total SA

Uncorrected

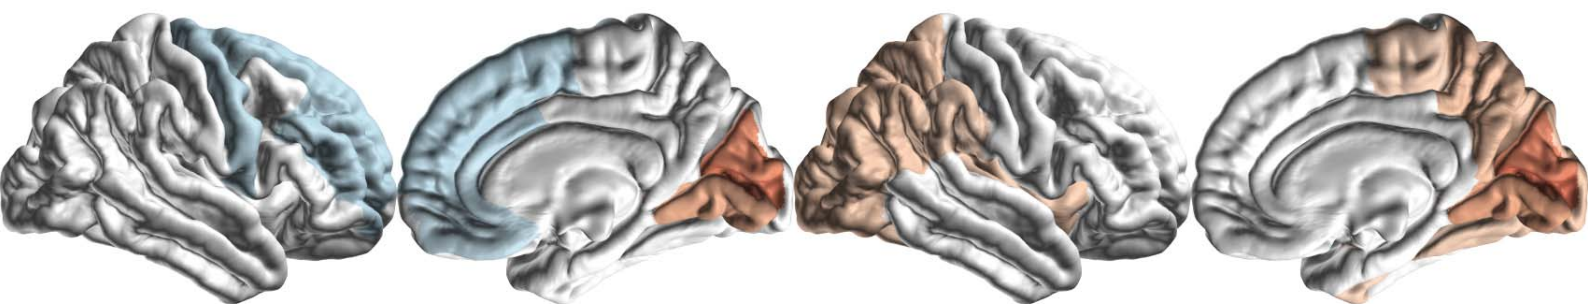



# Pericalcarine SA: rs1223090

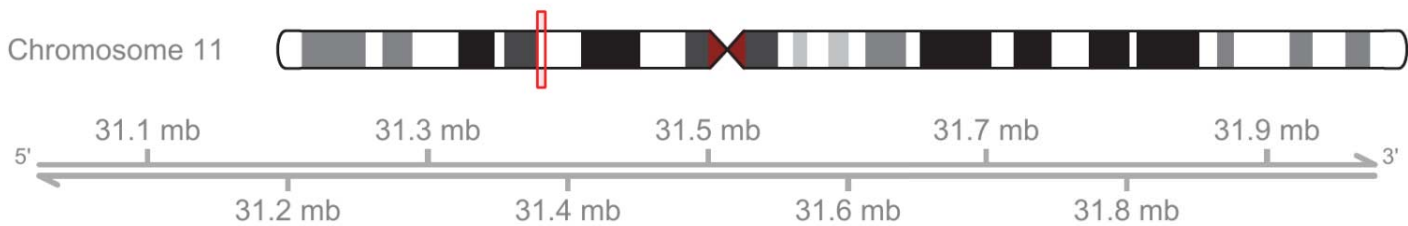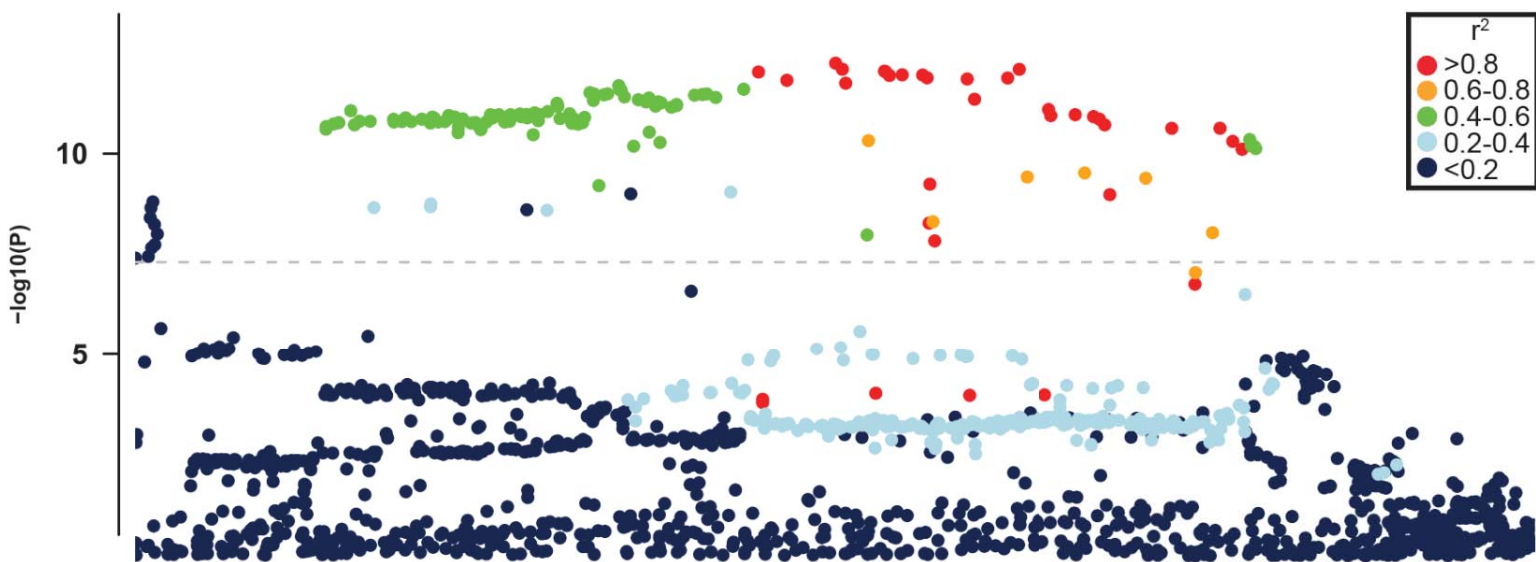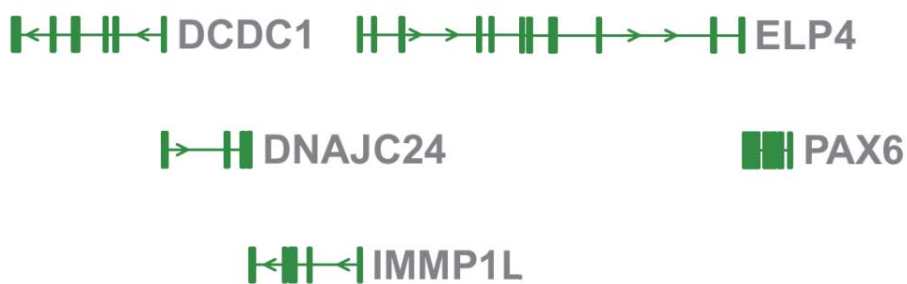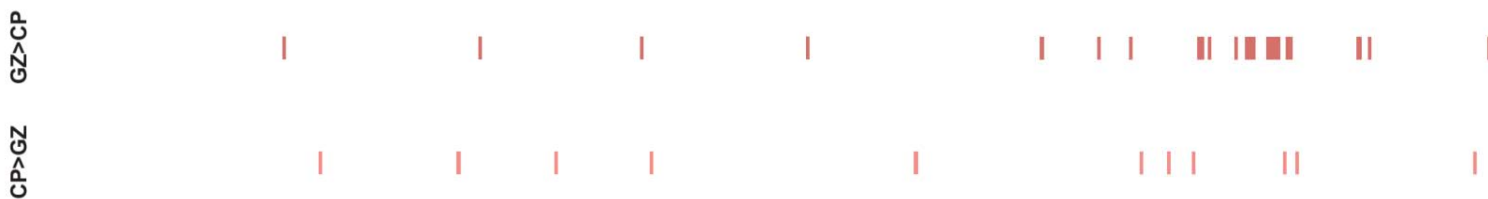

Corrected for total SA

Uncorrected

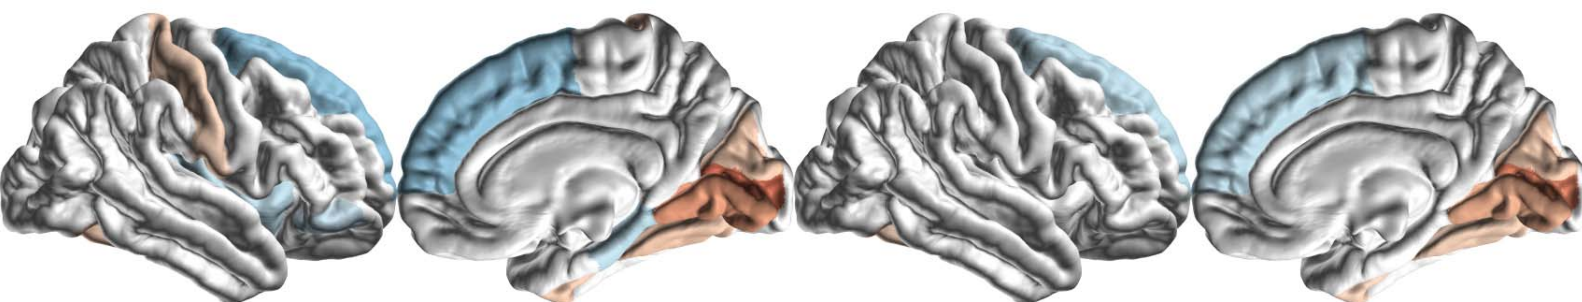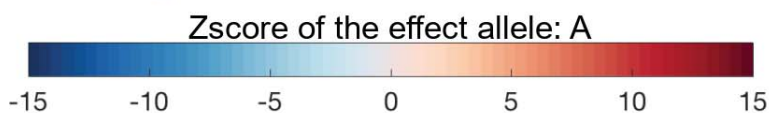

# Pericalcarine SA: rs17179798

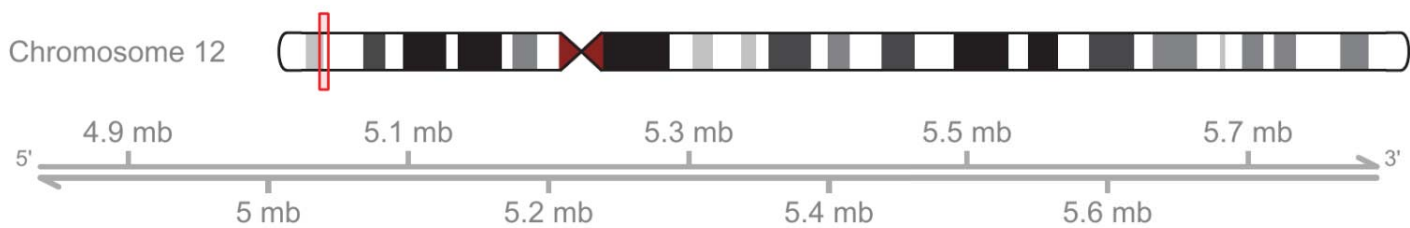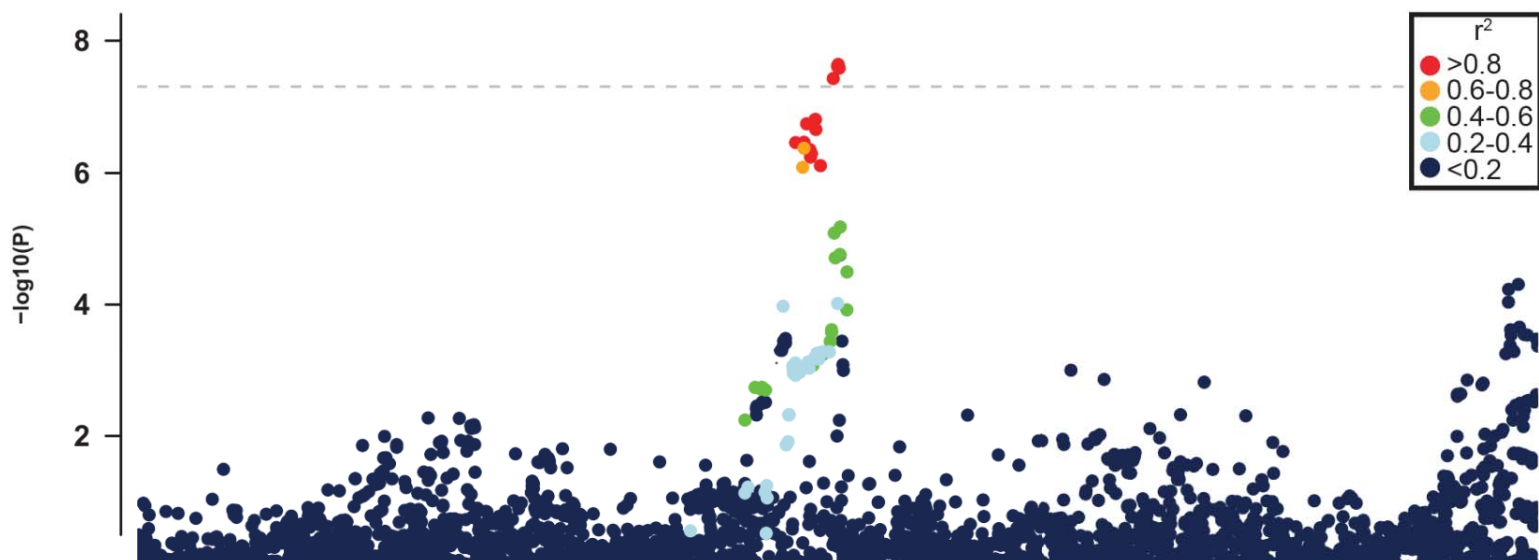

GALNT8

KCNA5

NTF3

KCNA6

KCNA1

GZ>CP

CP>GZ

Corrected for total SA

Uncorrected

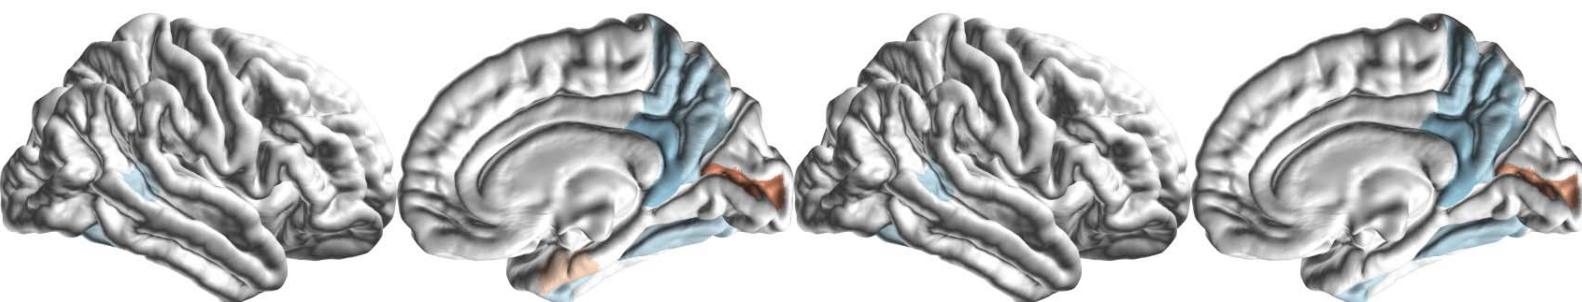

Zscore of the effect allele: A



# Pericalcarine SA: rs9545158

Chromosome 13

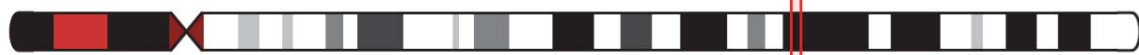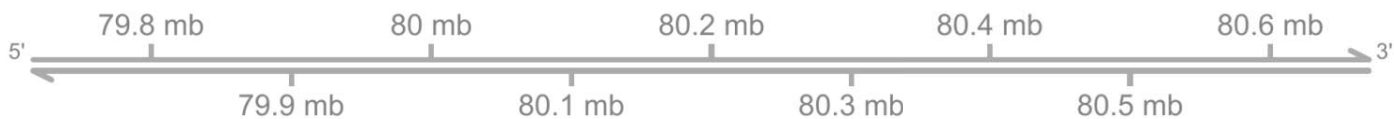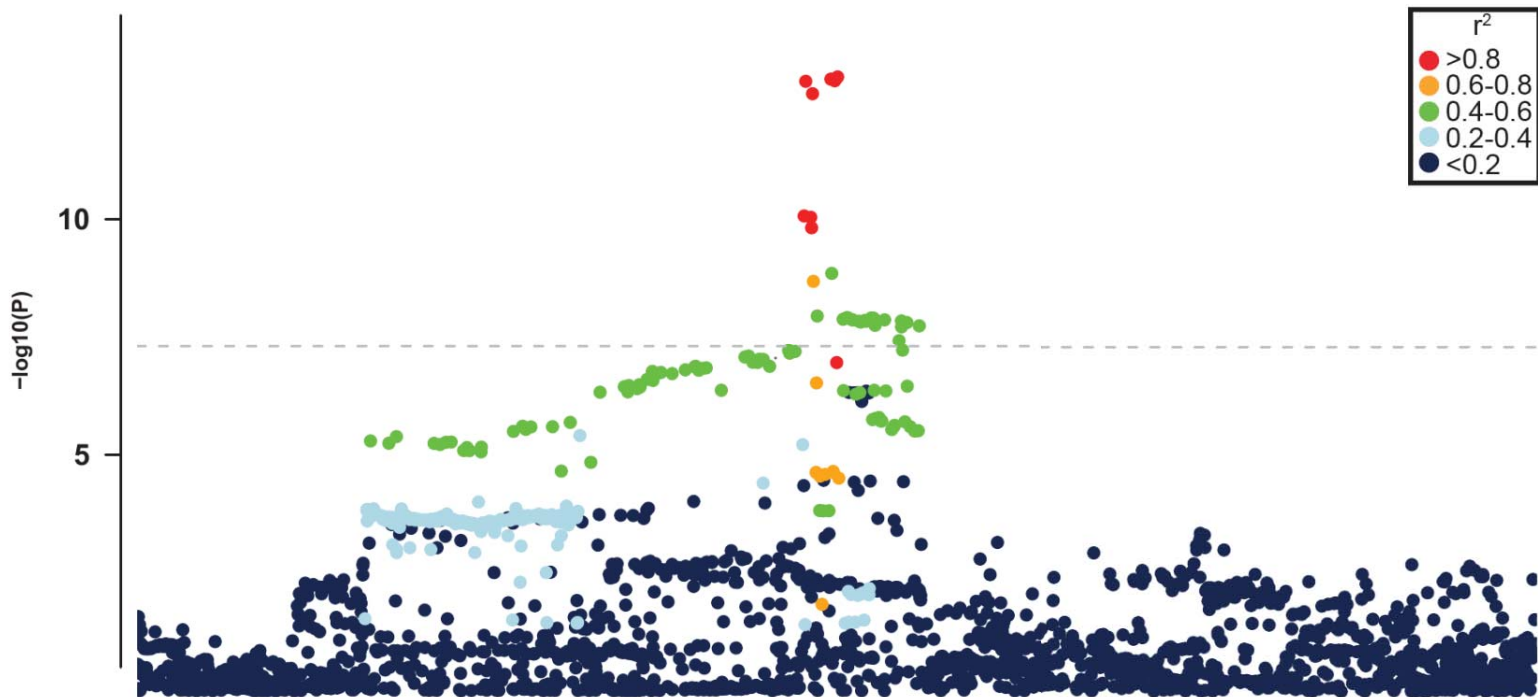

RBM26 NDFIP2

GZ>CP

CP>GZ

Corrected for total SA

Uncorrected

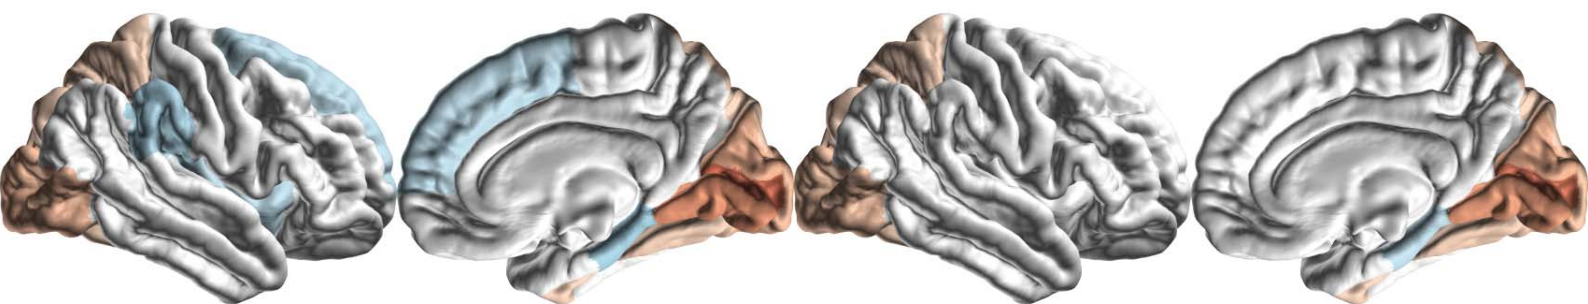

Zscore of the effect allele: A





# Pericalcarine SA: rs35342371

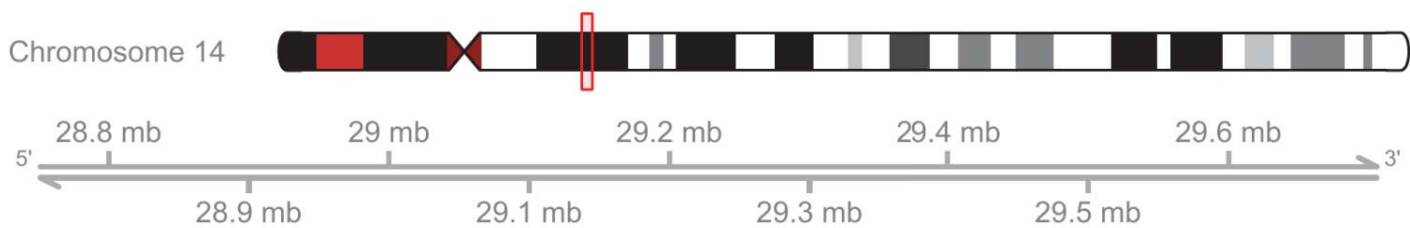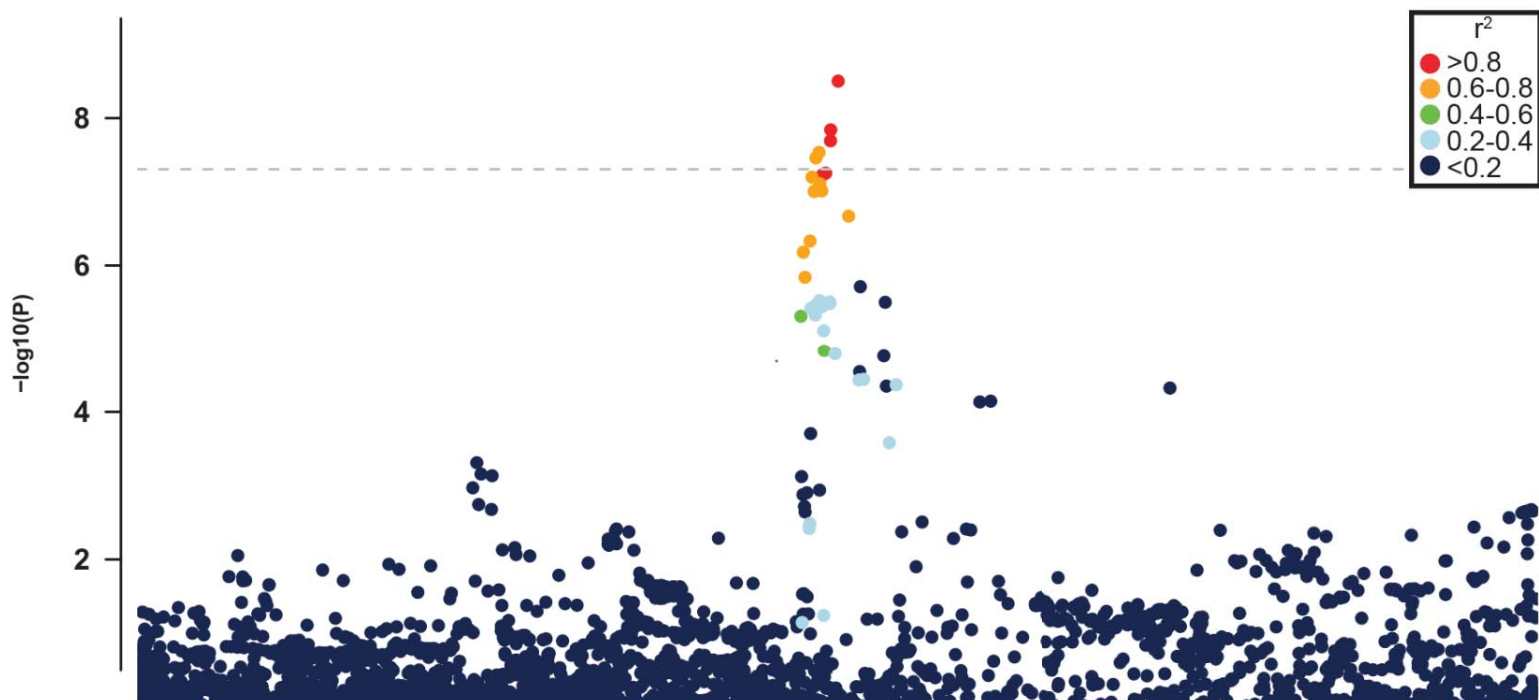

FOXG1

GZ>CP

CP>GZ

Corrected for total SA

Uncorrected

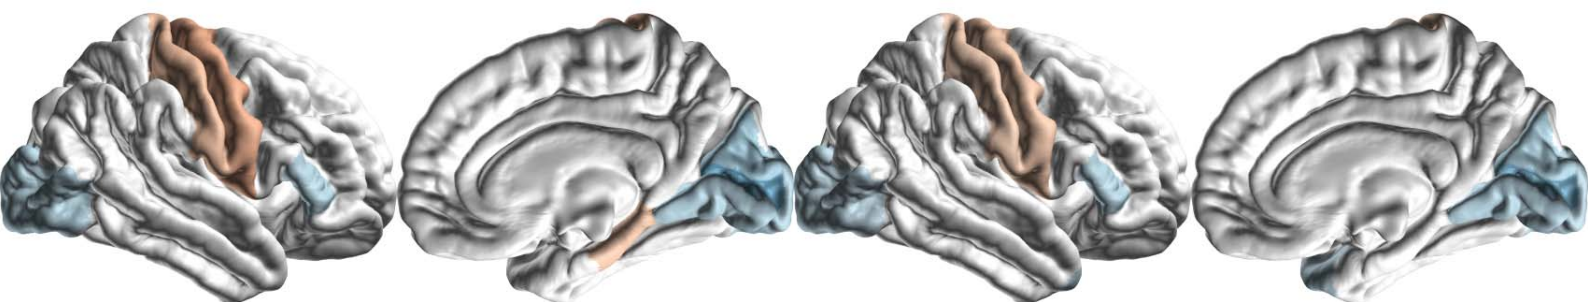

Zscore of the effect allele: A



# Pericalcarine SA: rs73313052

Chromosome 14

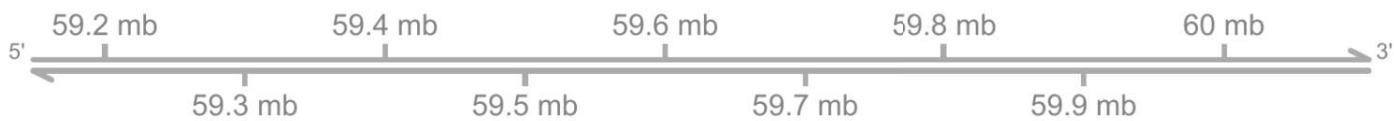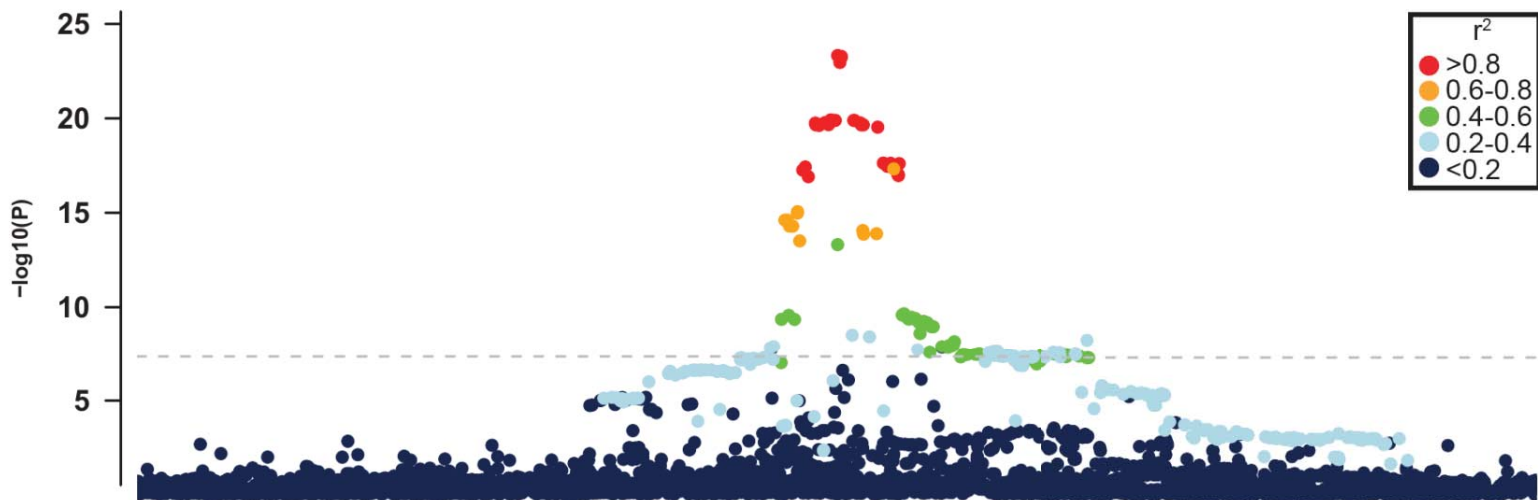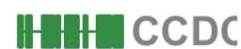

CP>GZ  
GZ>CP

Corrected for total SA

Uncorrected

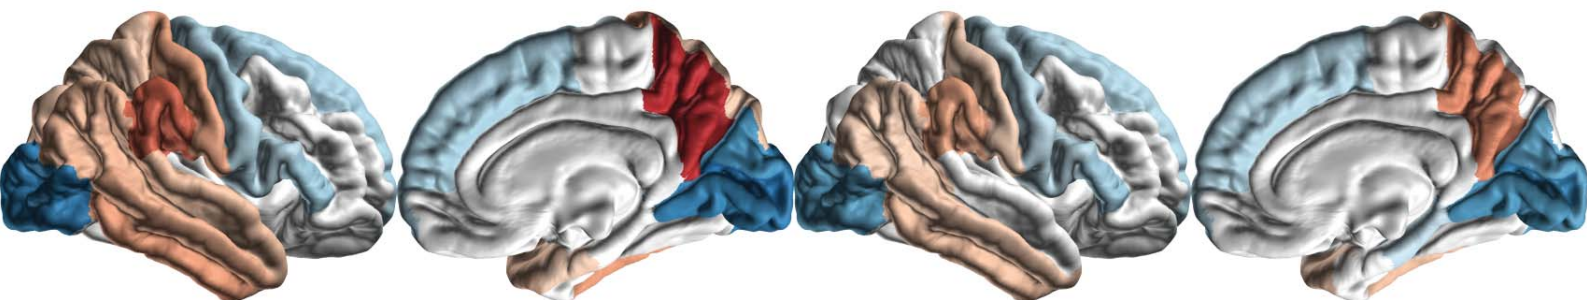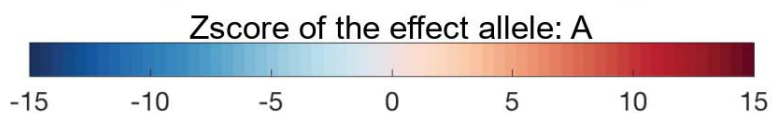

# Pericalcarine SA: rs7188071

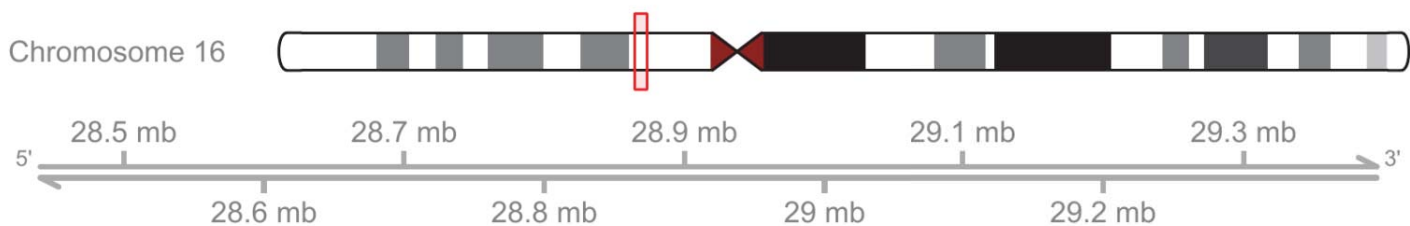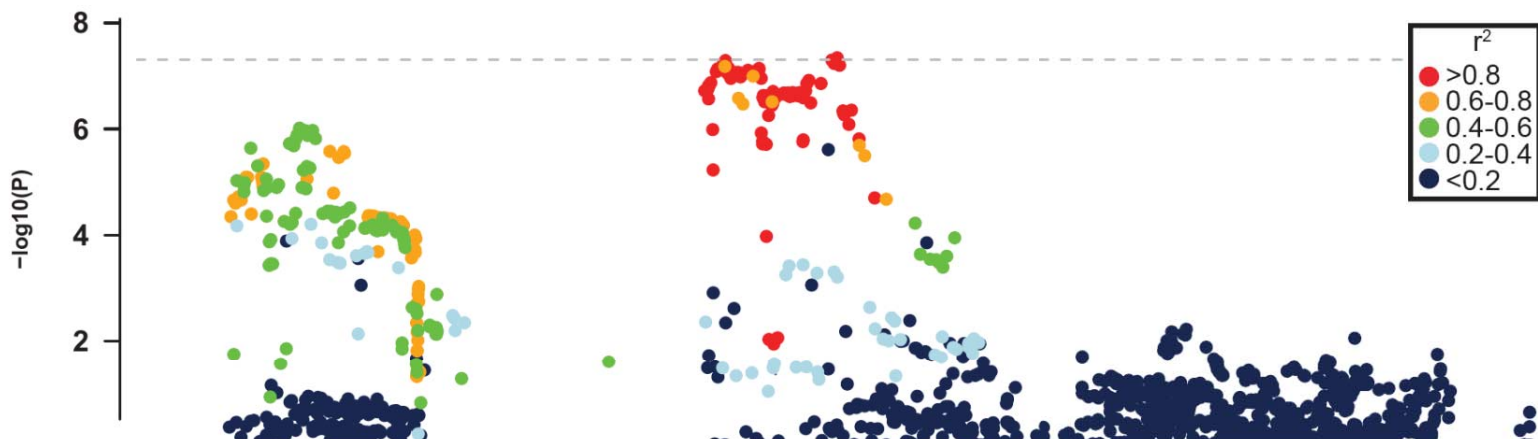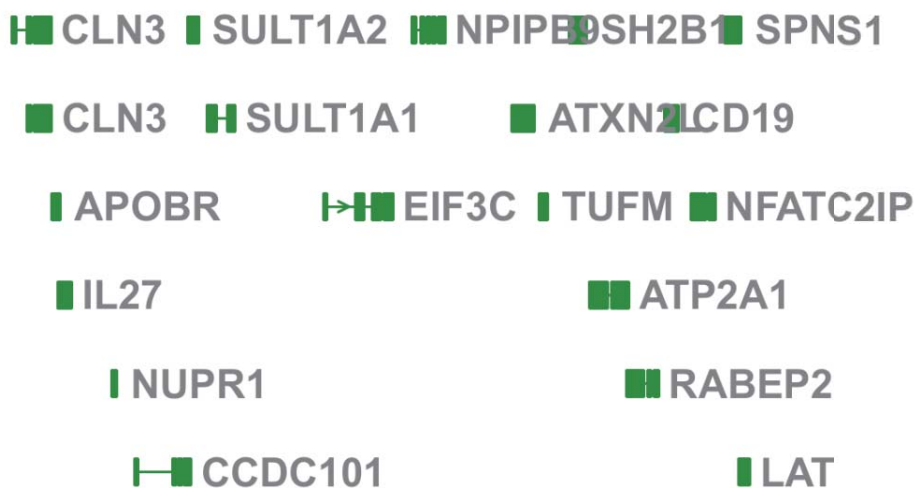

CP>GZ GZ>CP

Corrected for total SA

Uncorrected

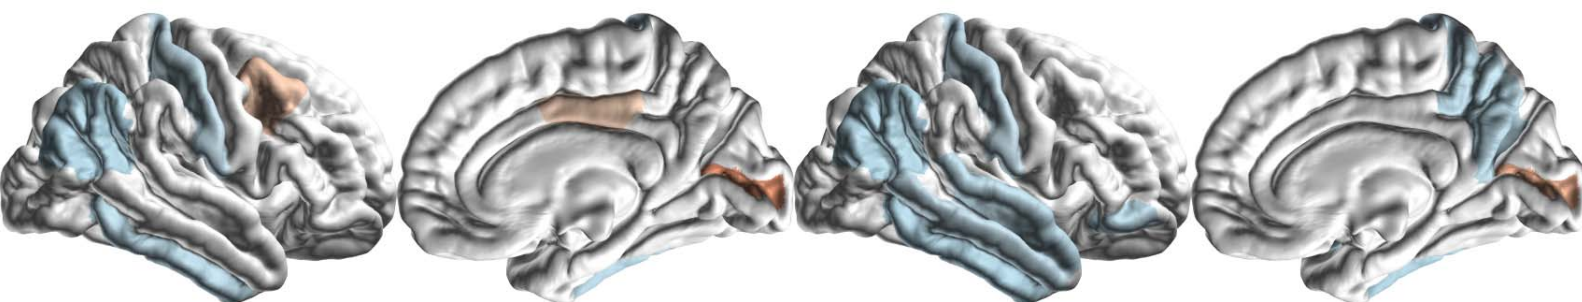

Zscore of the effect allele: T

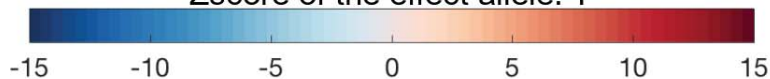



### Pericalcarine SA: rs13726

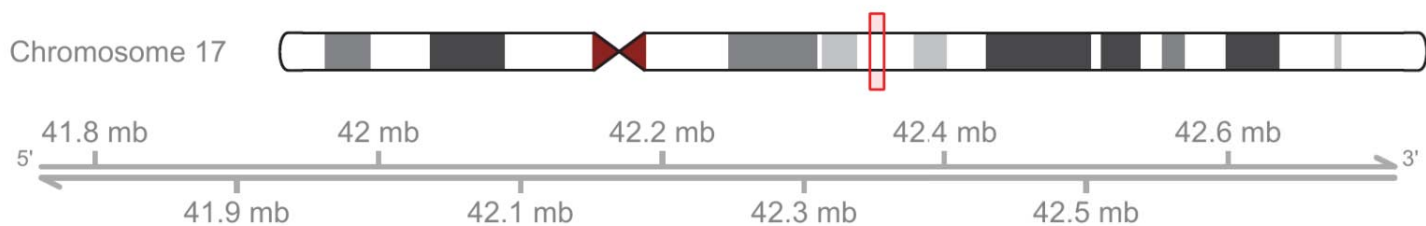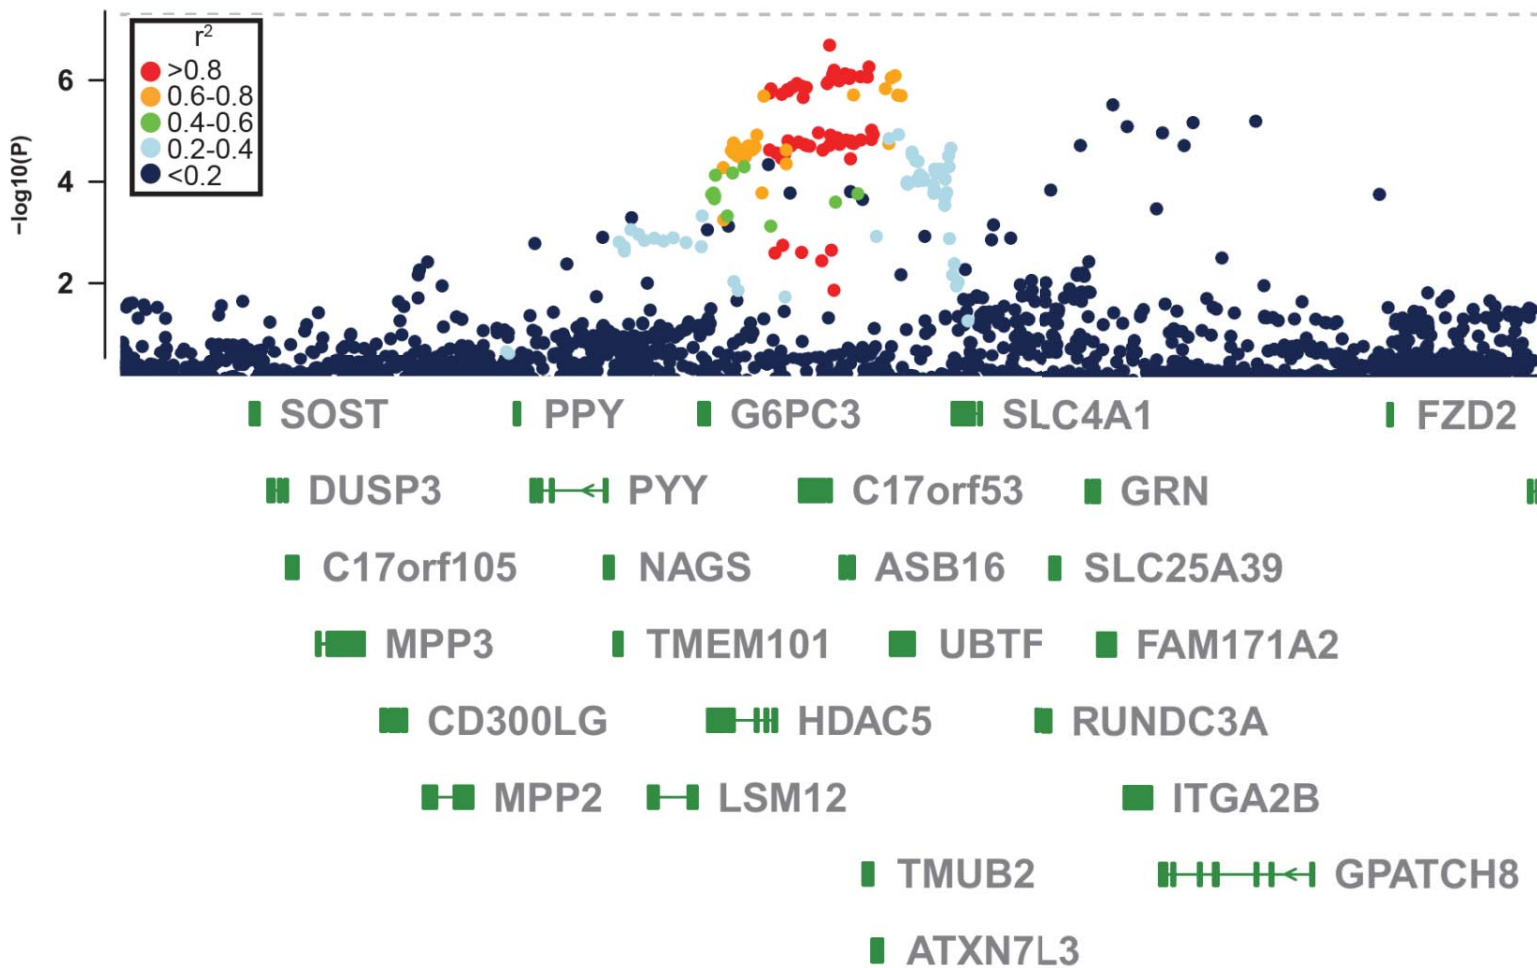

CP>GZGZ>CP

Corrected for total SA

Uncorrected

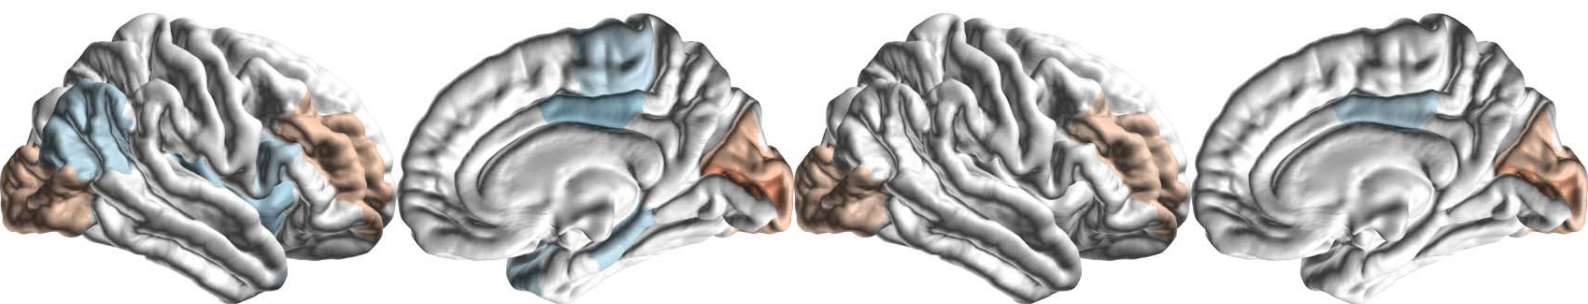

Zscore of the effect allele: T



# Pericalcarine SA: rs1420791

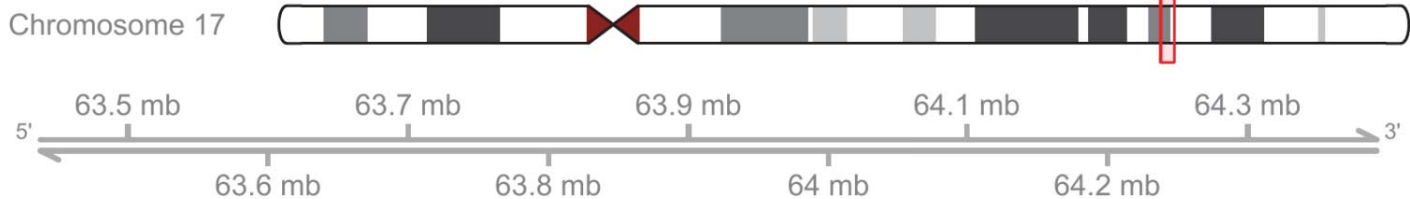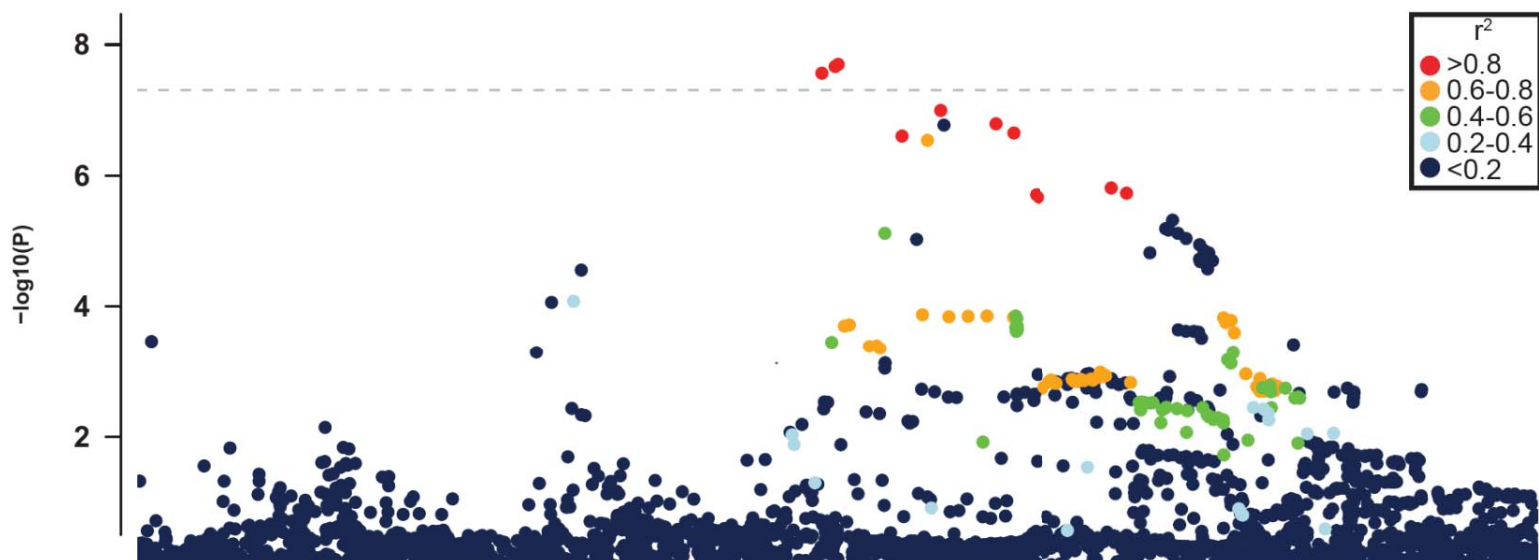

AXIN2

APOH

CEP112

GZ>CP

||

||

CP>GZ

|

Corrected for total SA

Uncorrected

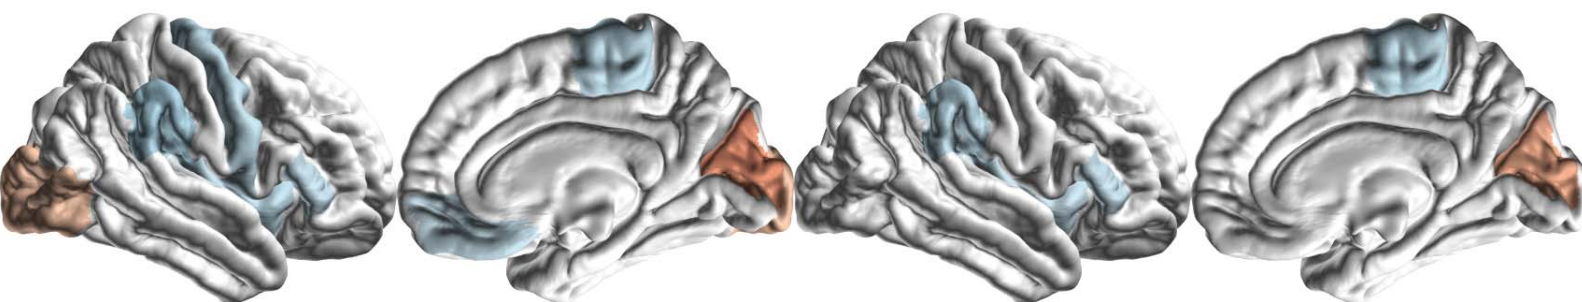

Zscore of the effect allele: A

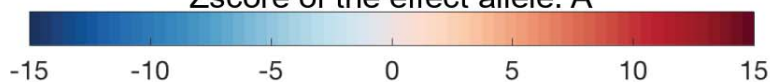

# Pericalcarine SA: rs4811476

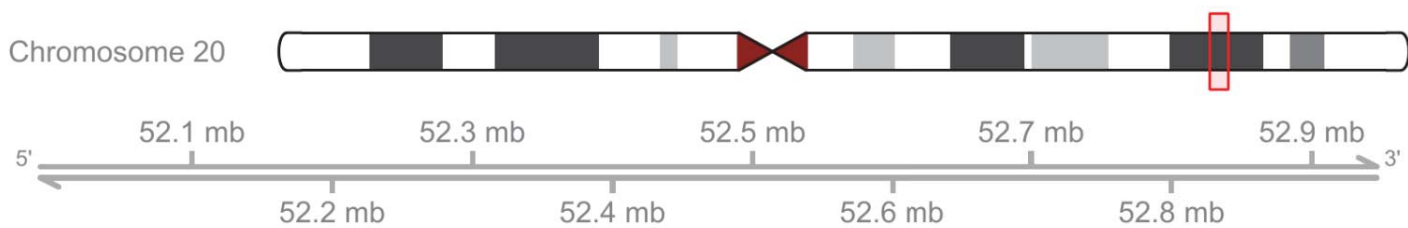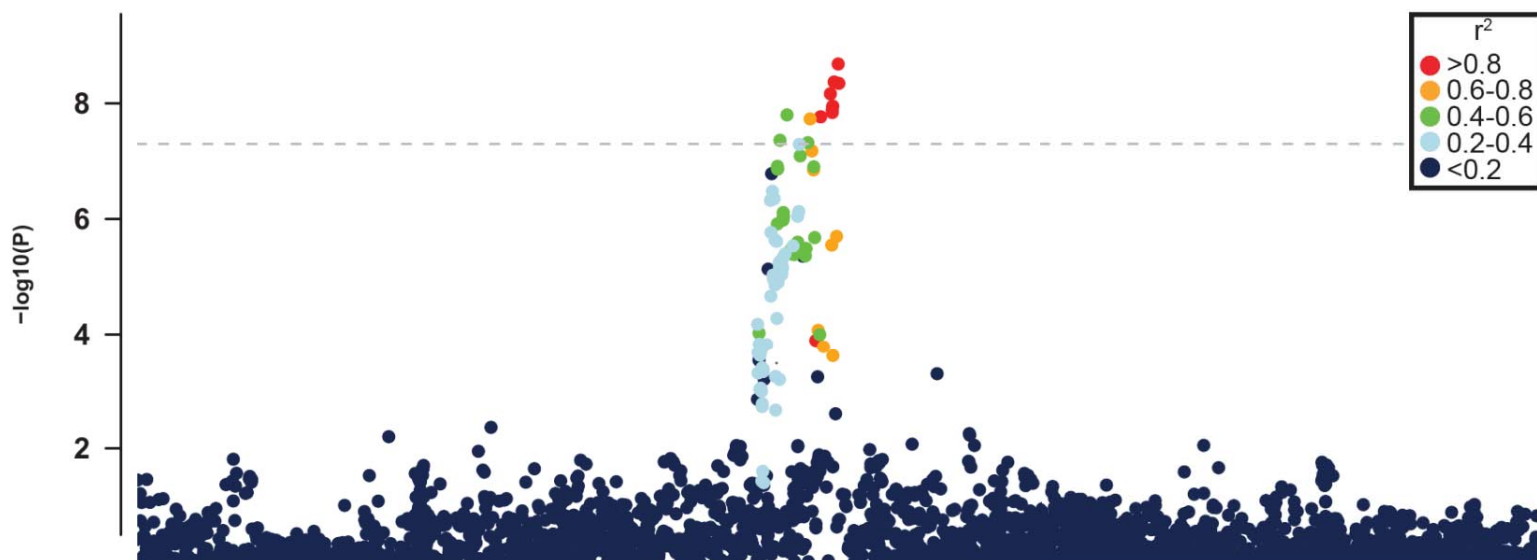

TSHZ2

BCAS1

ZNF217

CYP24A1

PFDN4

CP>GZ  
GZ>CP

Corrected for total SA

Uncorrected

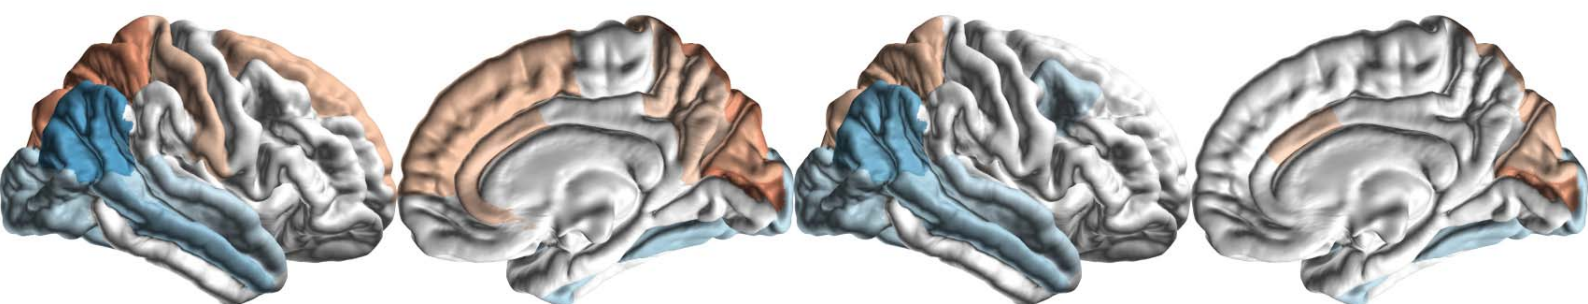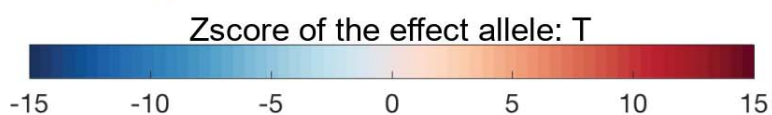



# Pericalcarine TH: rs117461235

Chromosome 14

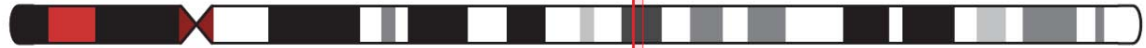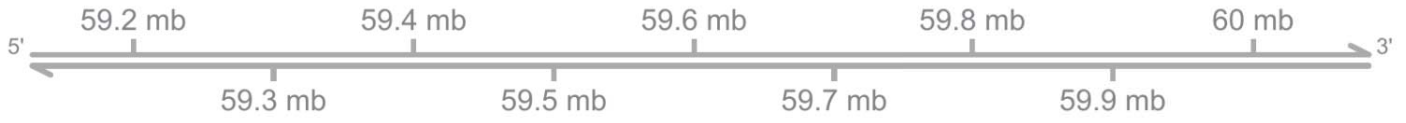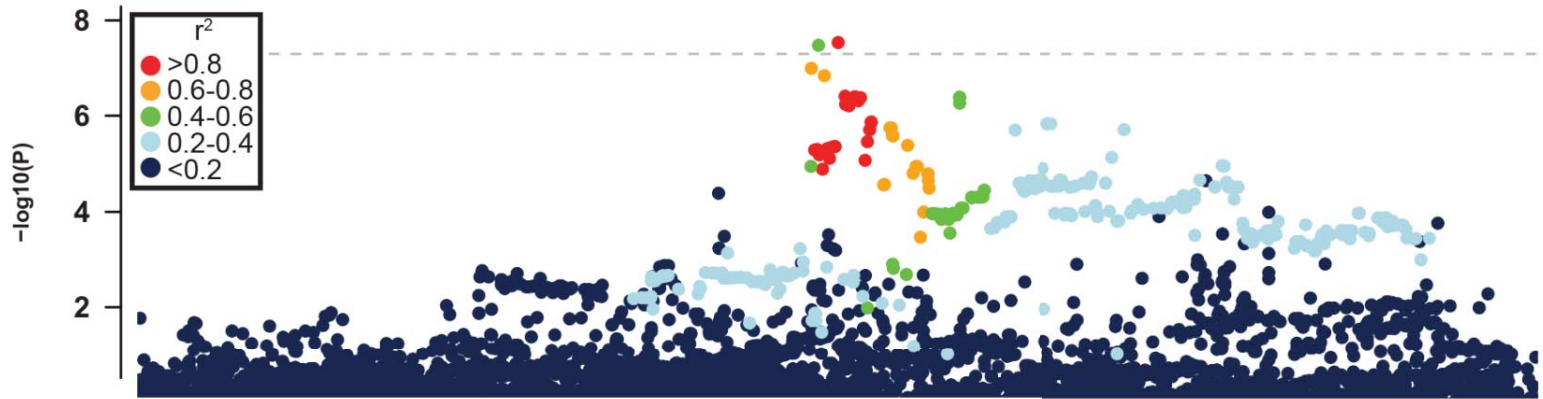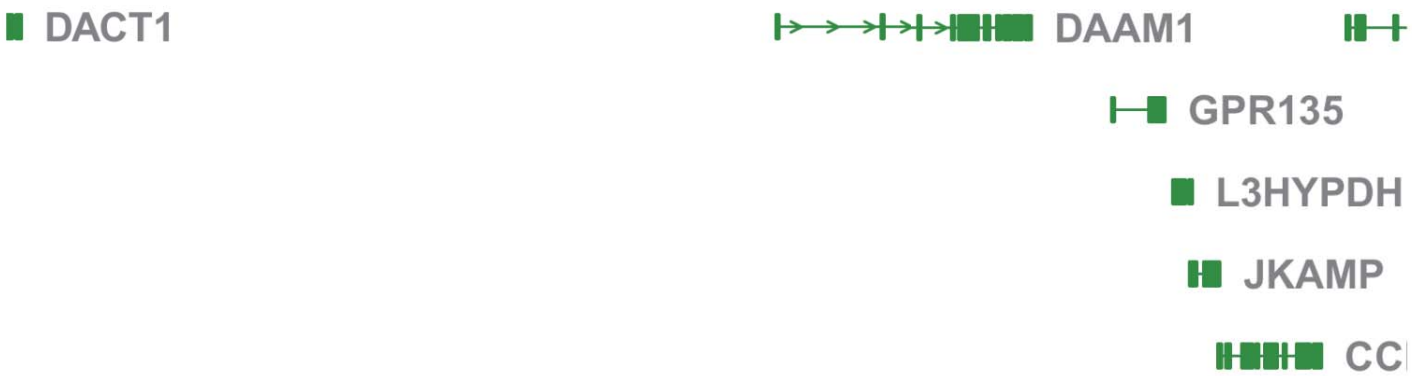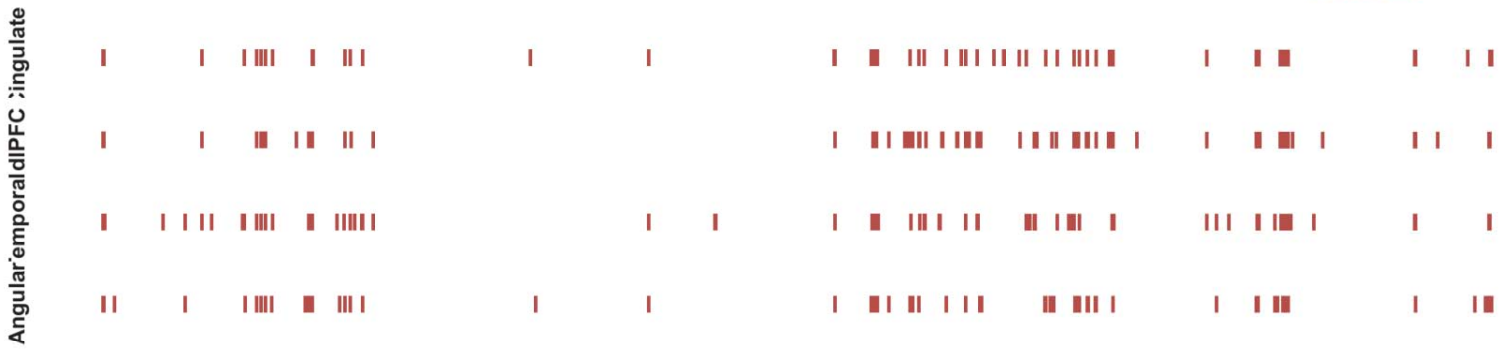

Corrected for average TH

Uncorrected

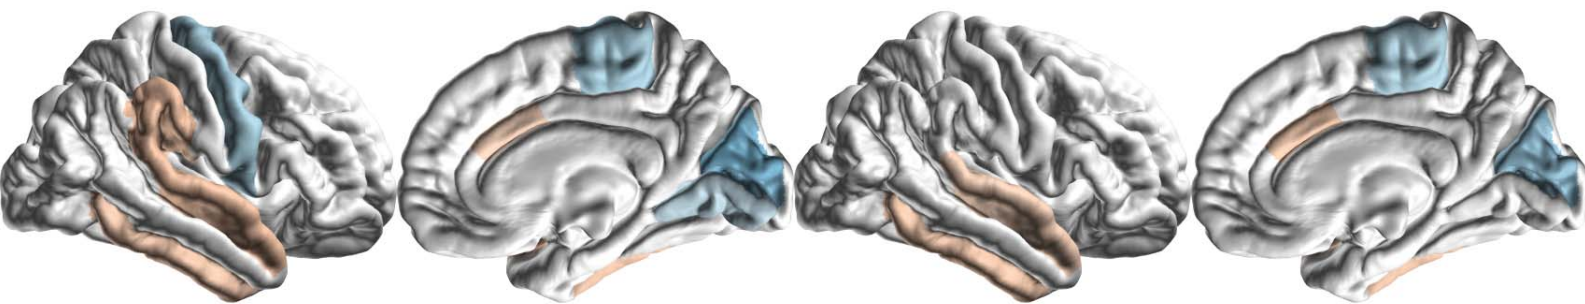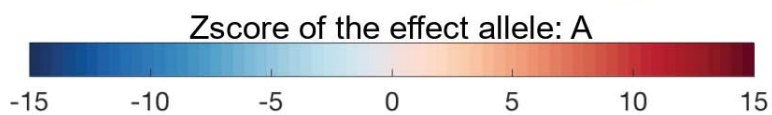

# Cuneus SA: rs7585601

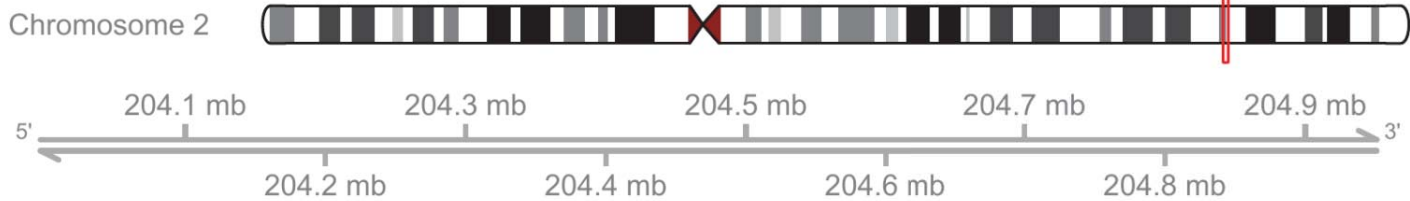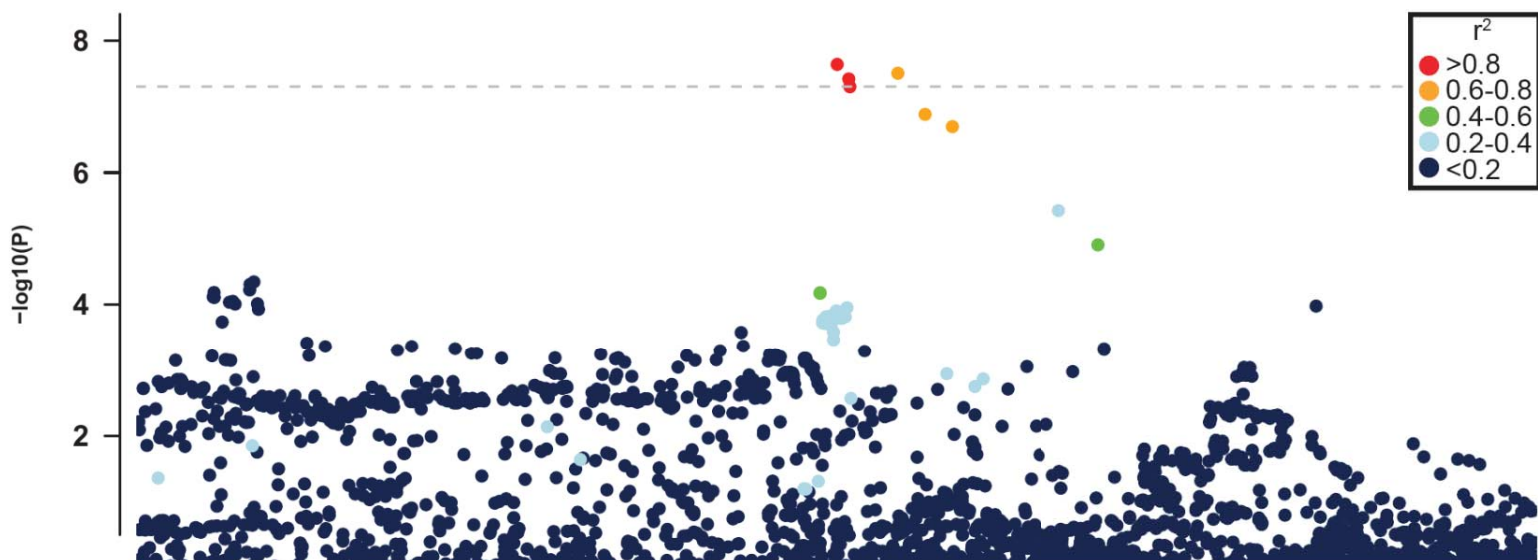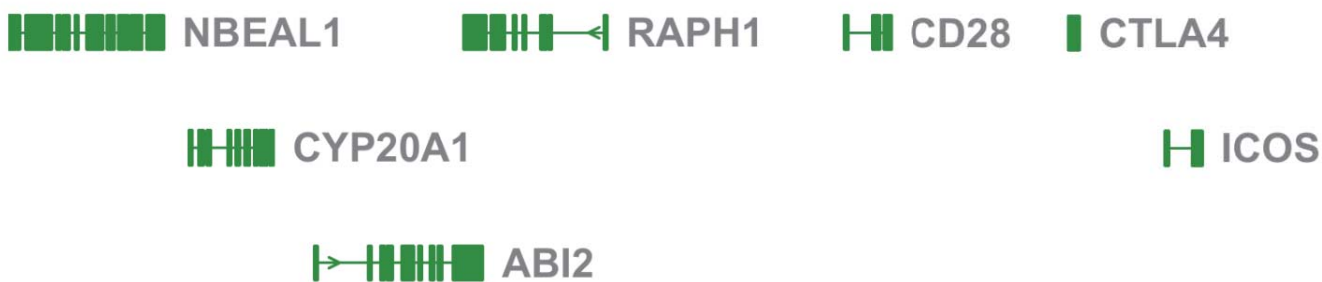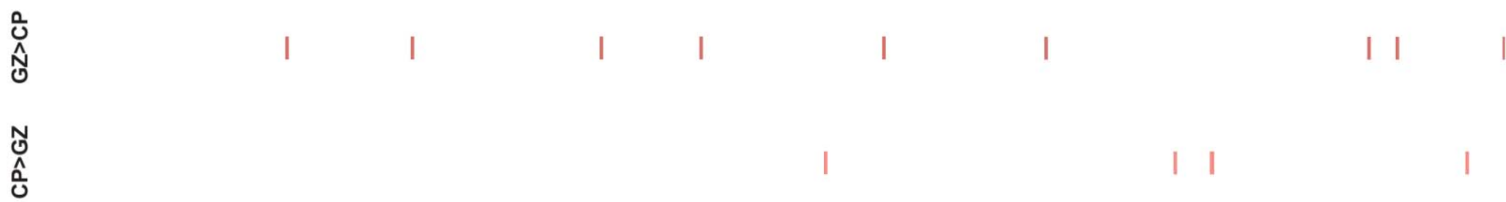

Corrected for total SA

Uncorrected

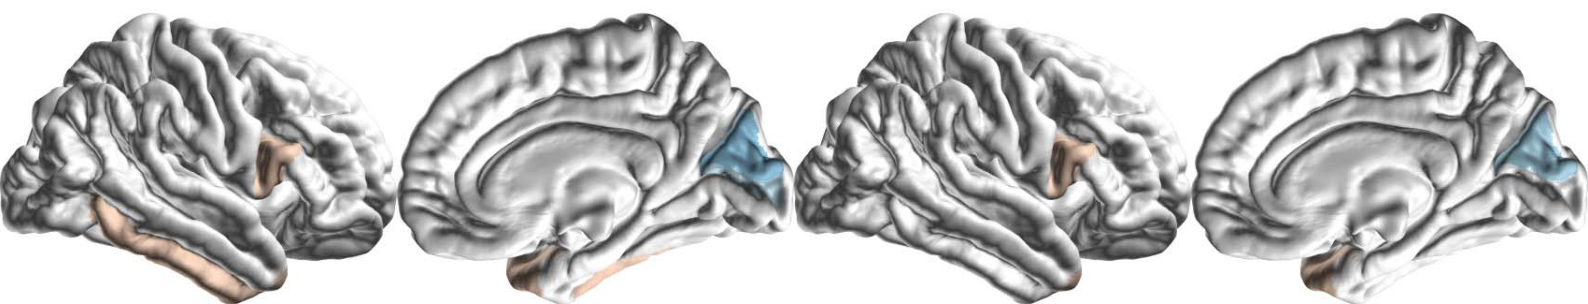

# Cuneus SA: rs4895120

Chromosome 3

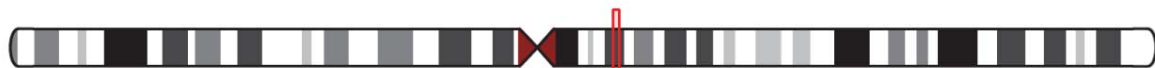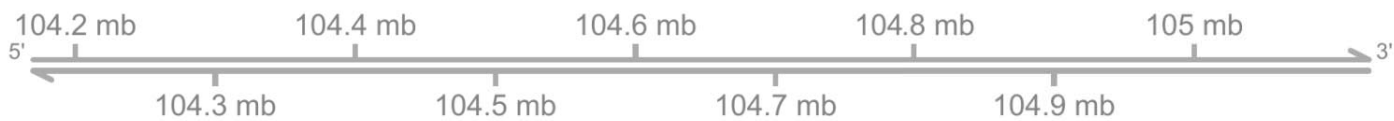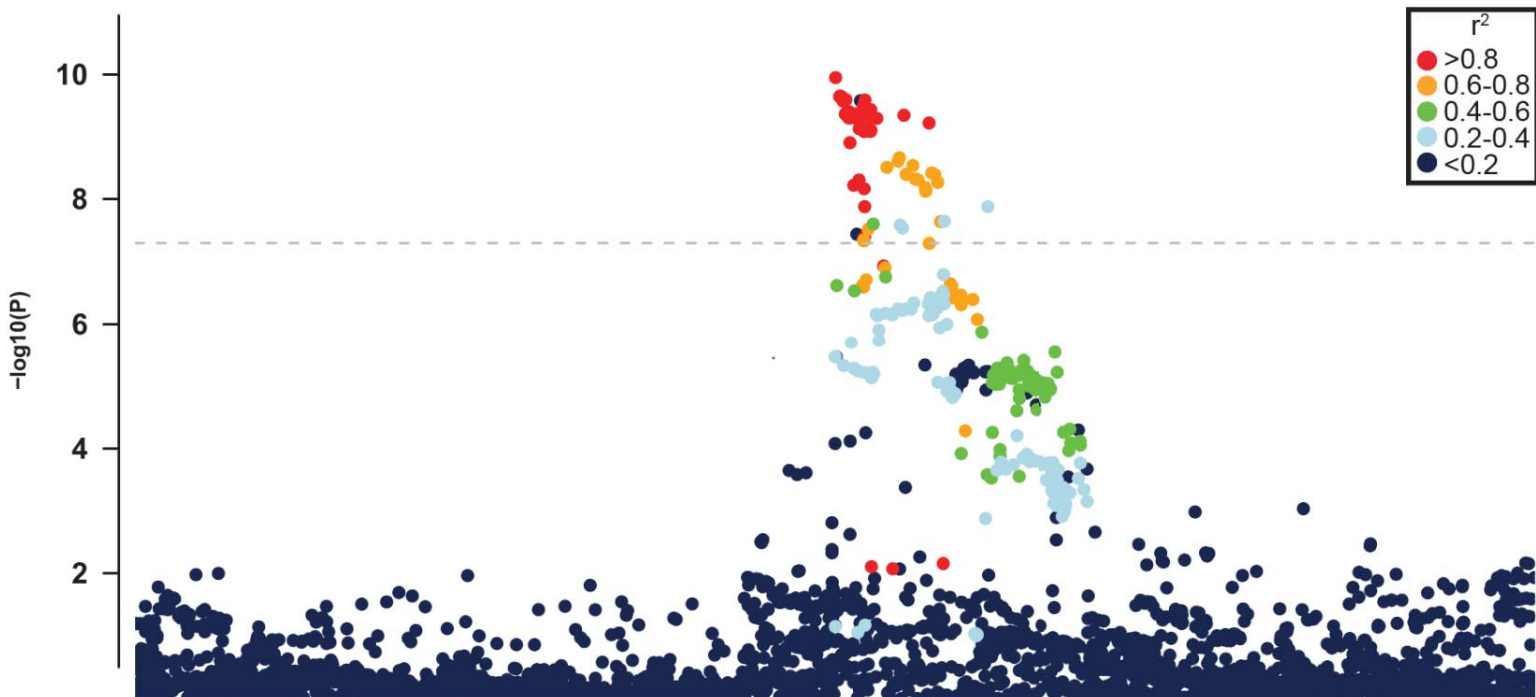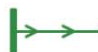

GZ>CP

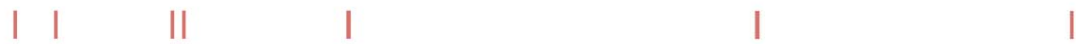

CP>GZ

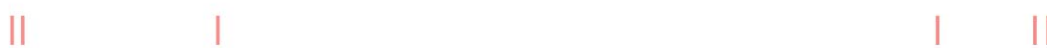

Corrected for total SA

Uncorrected

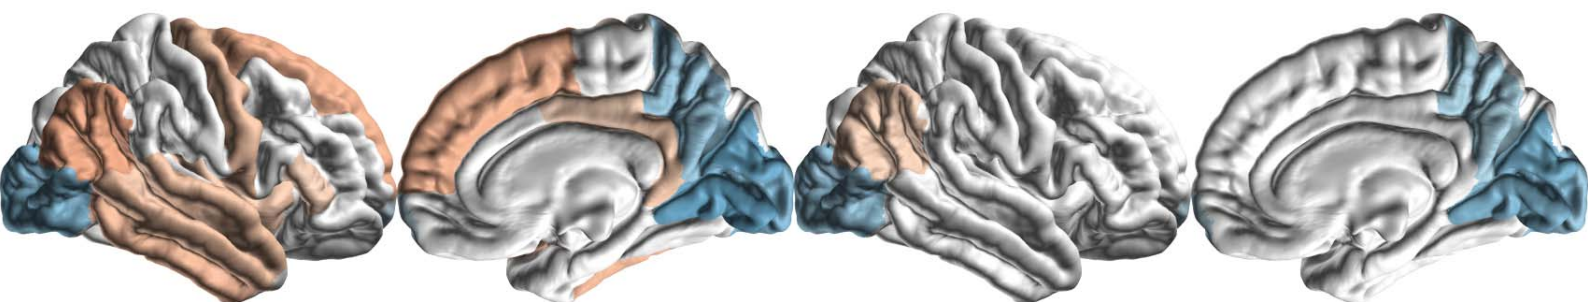

Zscore of the effect allele: T

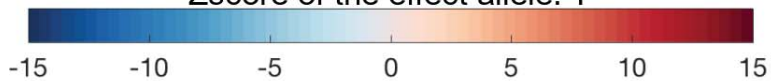



# Cuneus SA: rs76470478

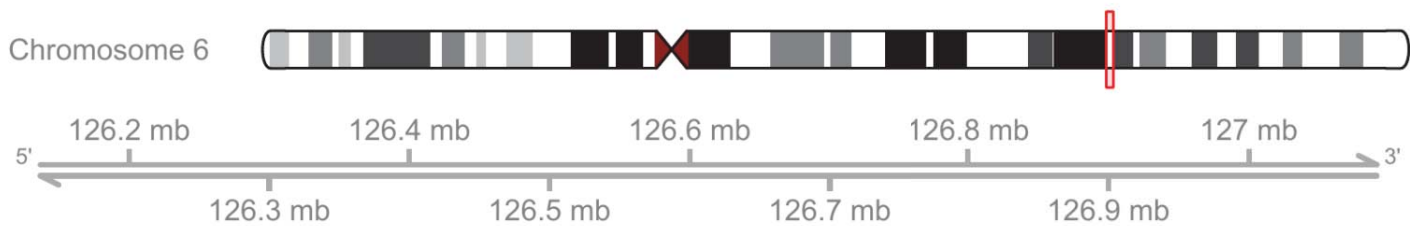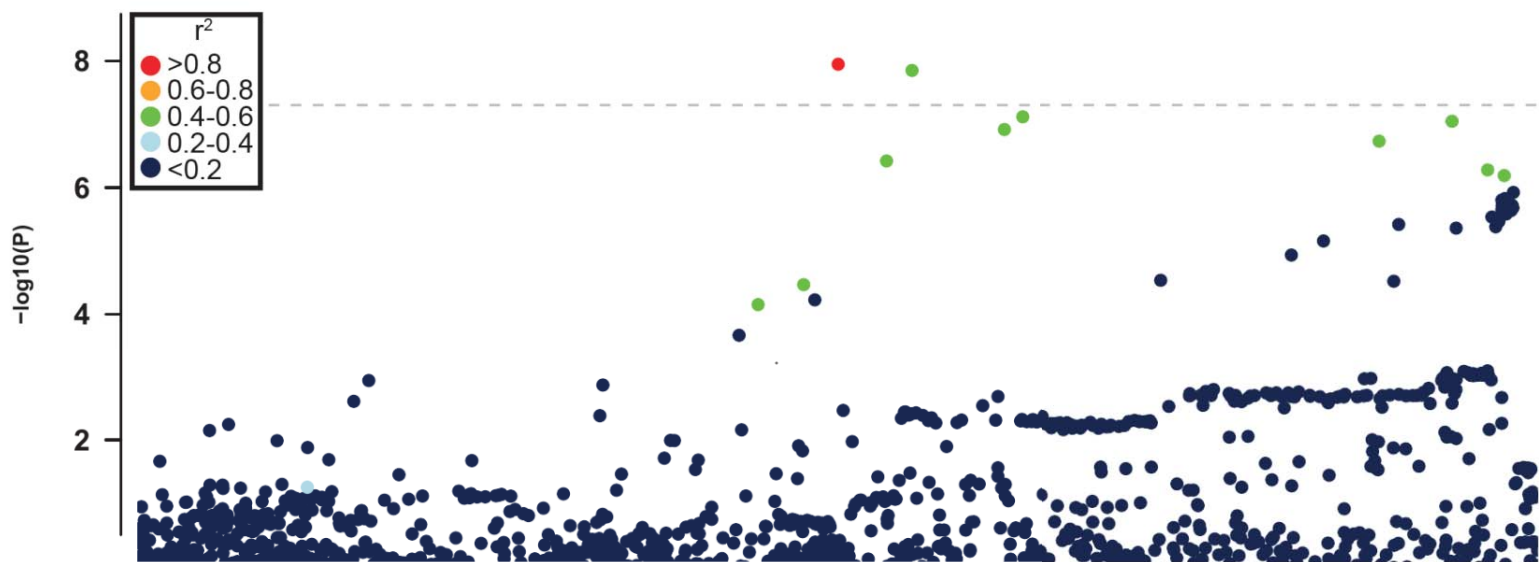

NCOA7 CENPW

HINT3

TRMT11

GZ>CP  
CP>GZ

Corrected for total SA

Uncorrected

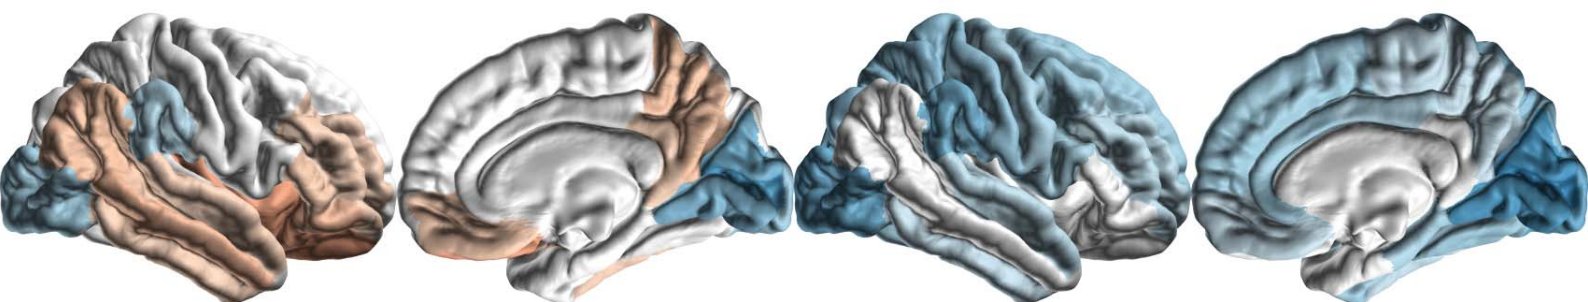

-15 -10 -5 0 5 10 15

# Cuneus SA: rs957960

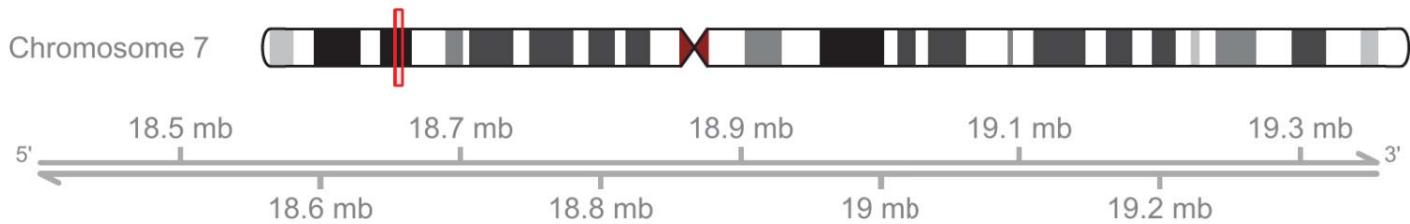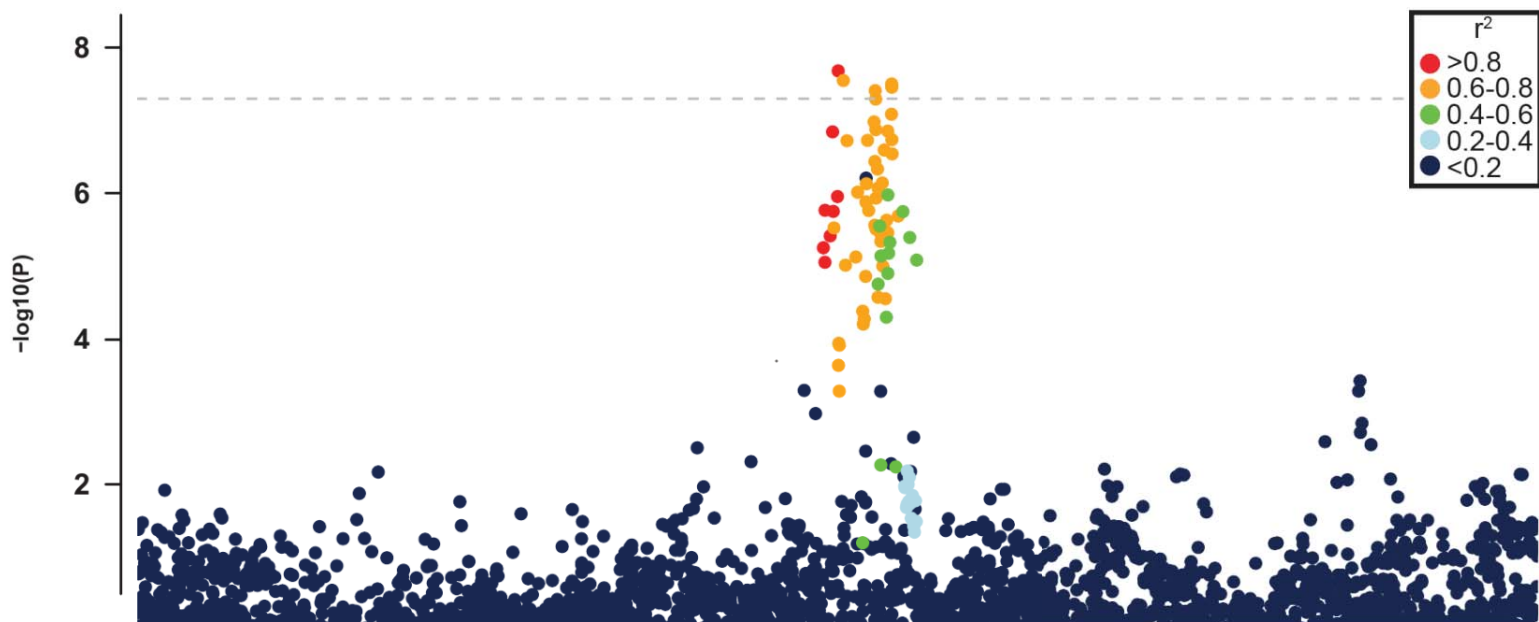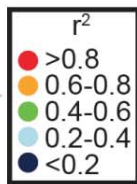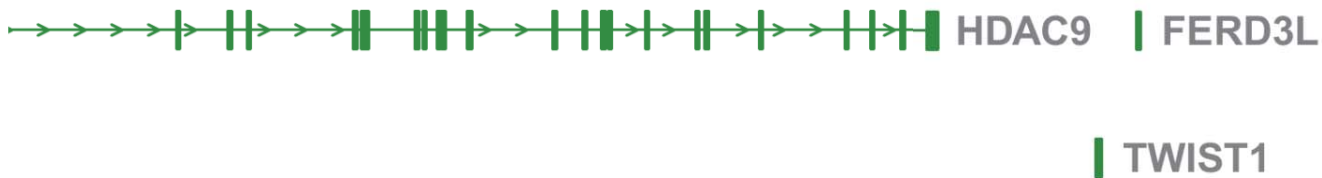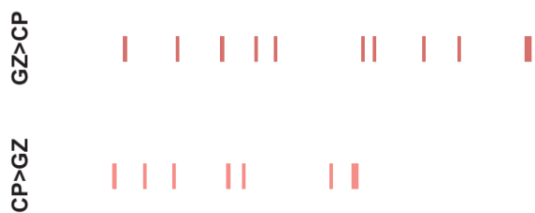

Corrected for total SA

Uncorrected

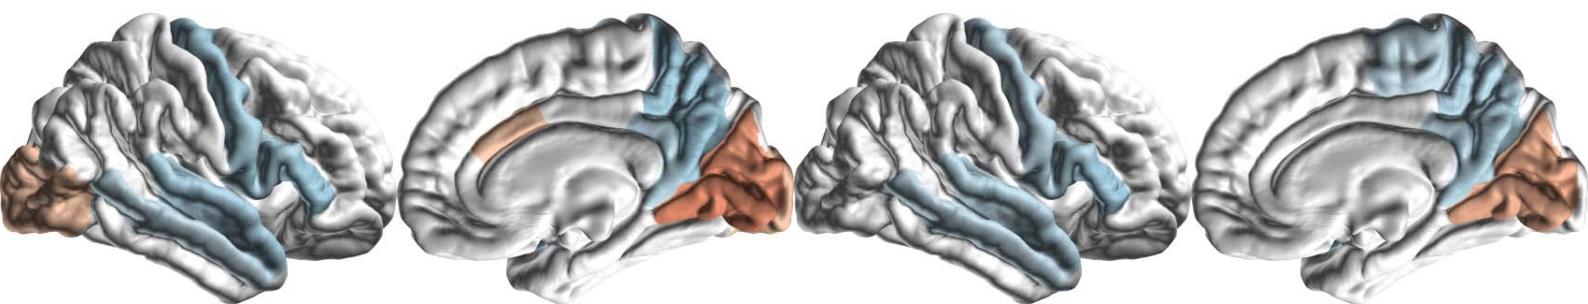

# Cuneus SA: rs10765918

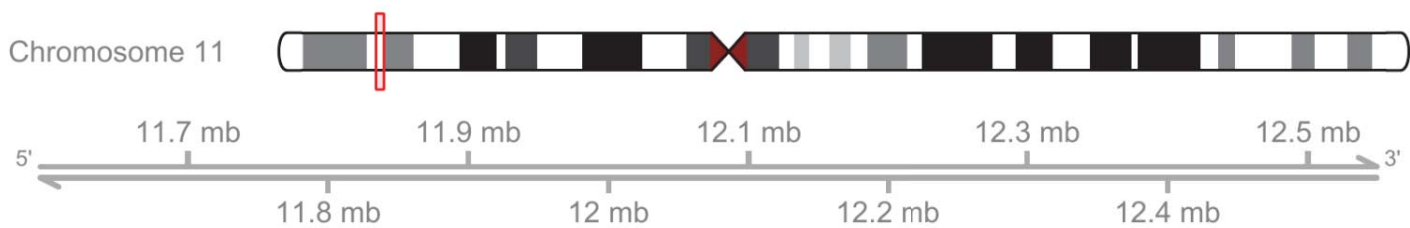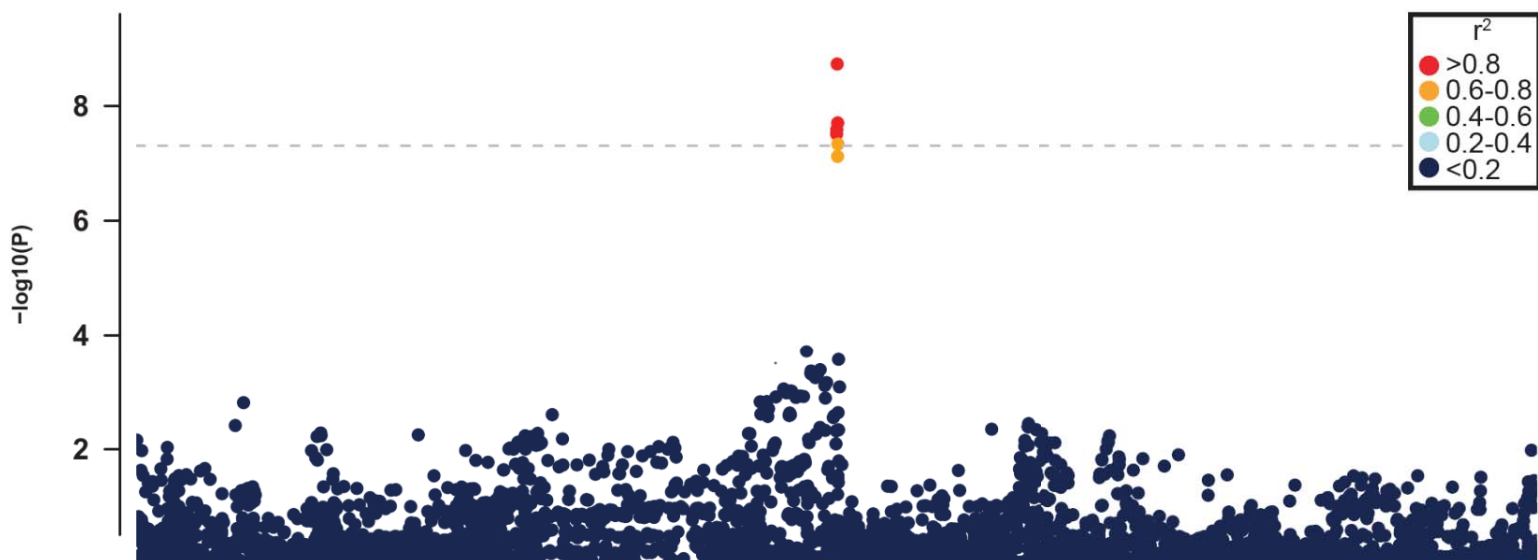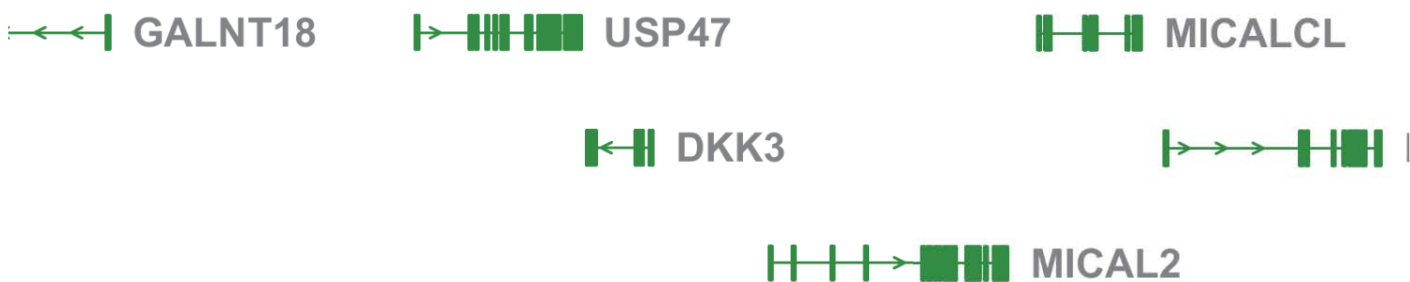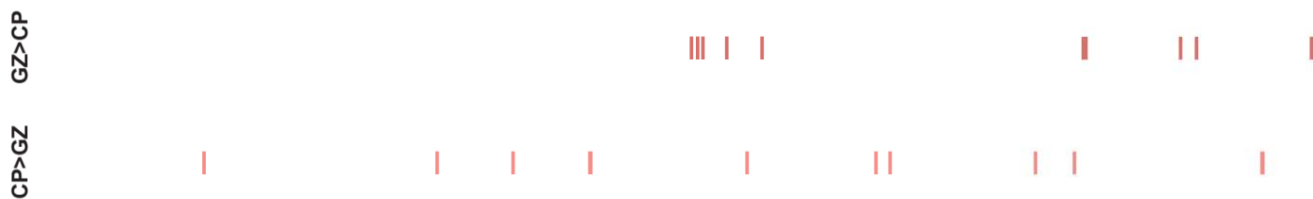

Corrected for total SA

Uncorrected





### Cuneus SA: rs170239

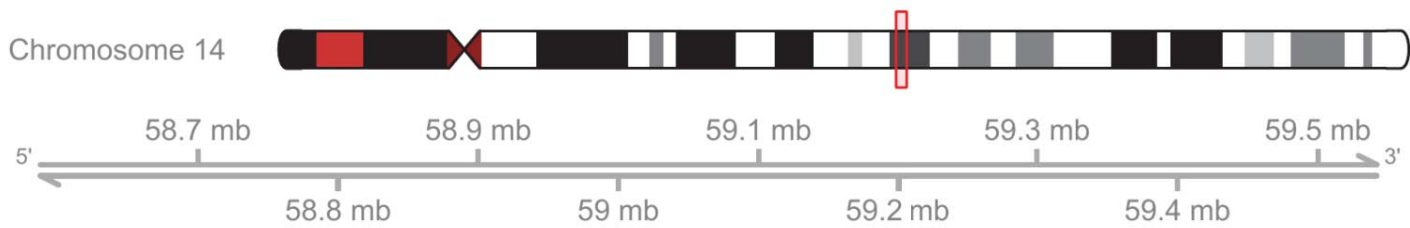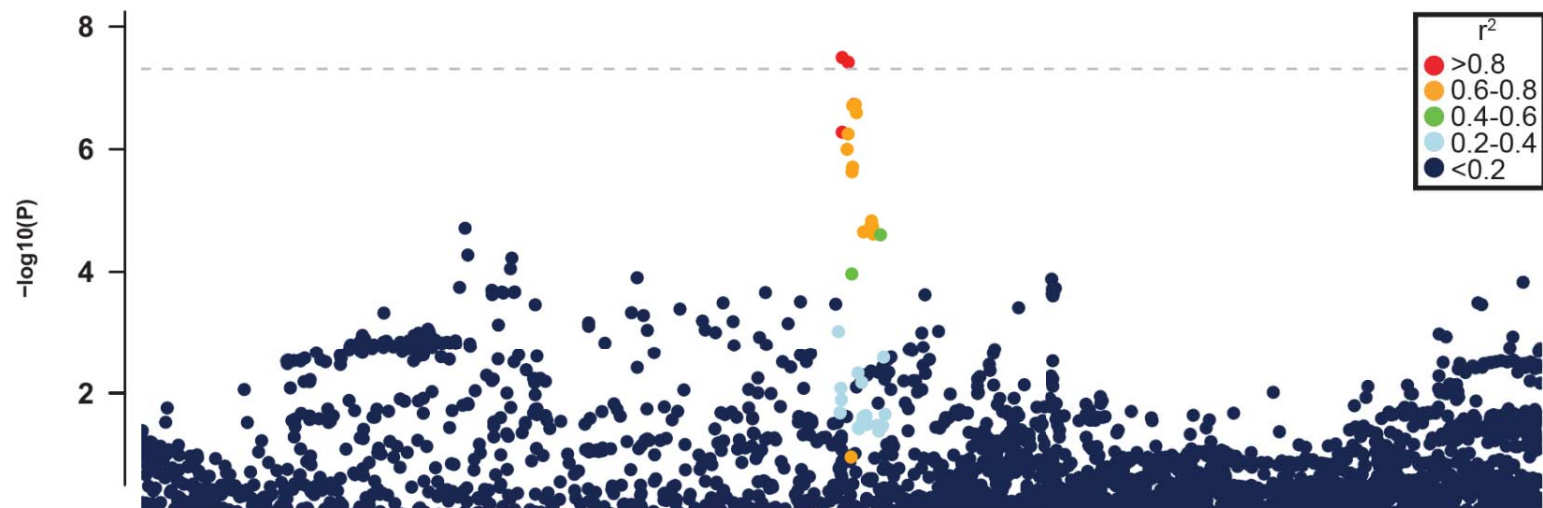

C14orf37 ARID4A DACT1

ACTR10 TOMM20L

PSMA3 TIMM9

KIAA0586

CP>GZ GZ>CP

Corrected for total SA

Uncorrected

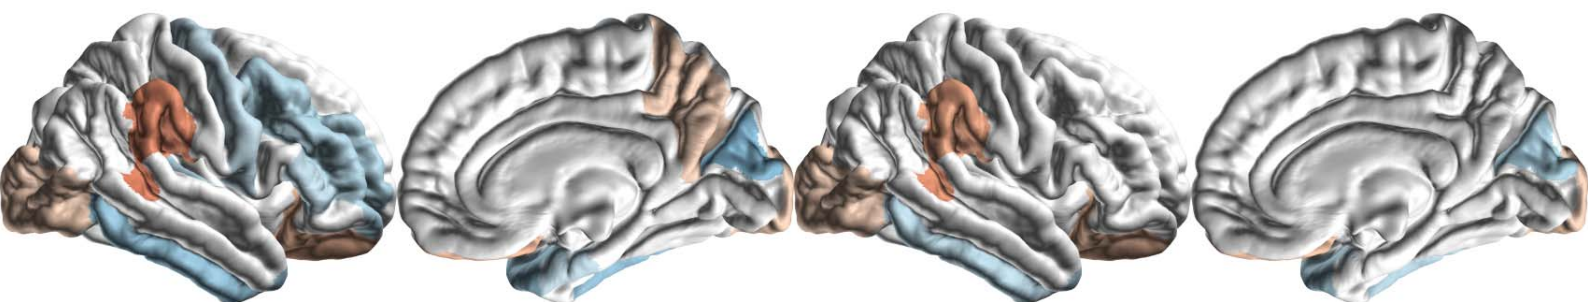

Zscore of the effect allele: T

-15 -10 -5 0 5 10 15

# Cuneus SA: rs73313052

Chromosome 14

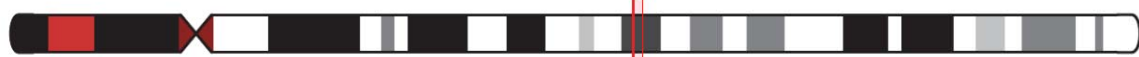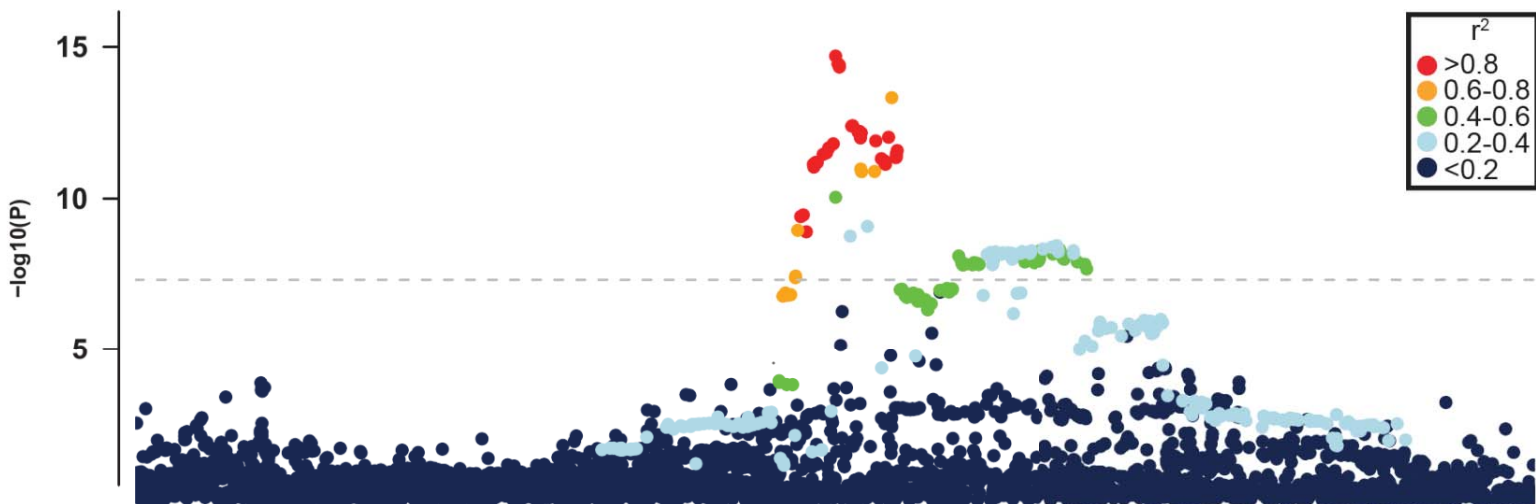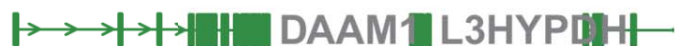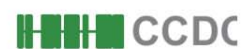

CP>GZ  
GZ>CP

Corrected for total SA

Uncorrected

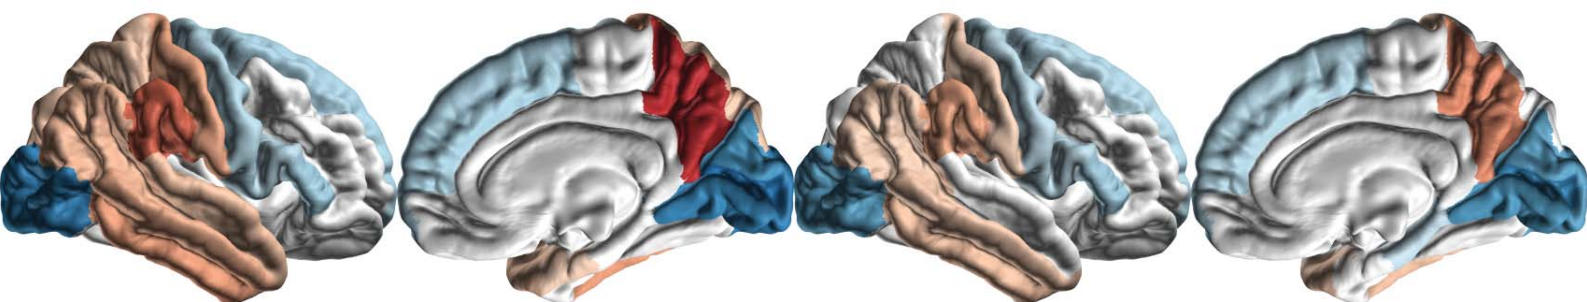

Zscore of the effect allele: A



# Cuneus SA: rs11652557

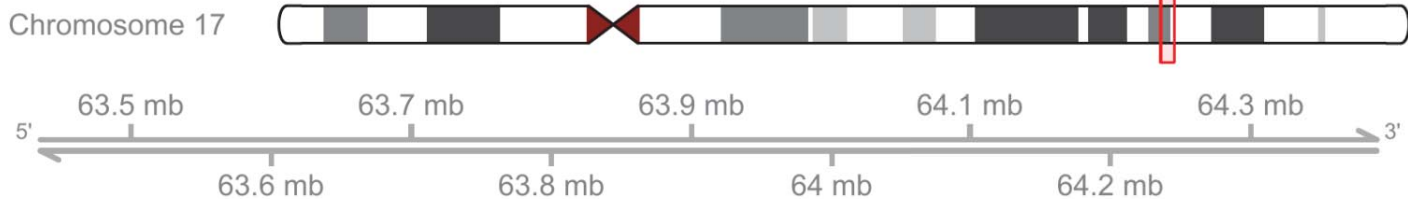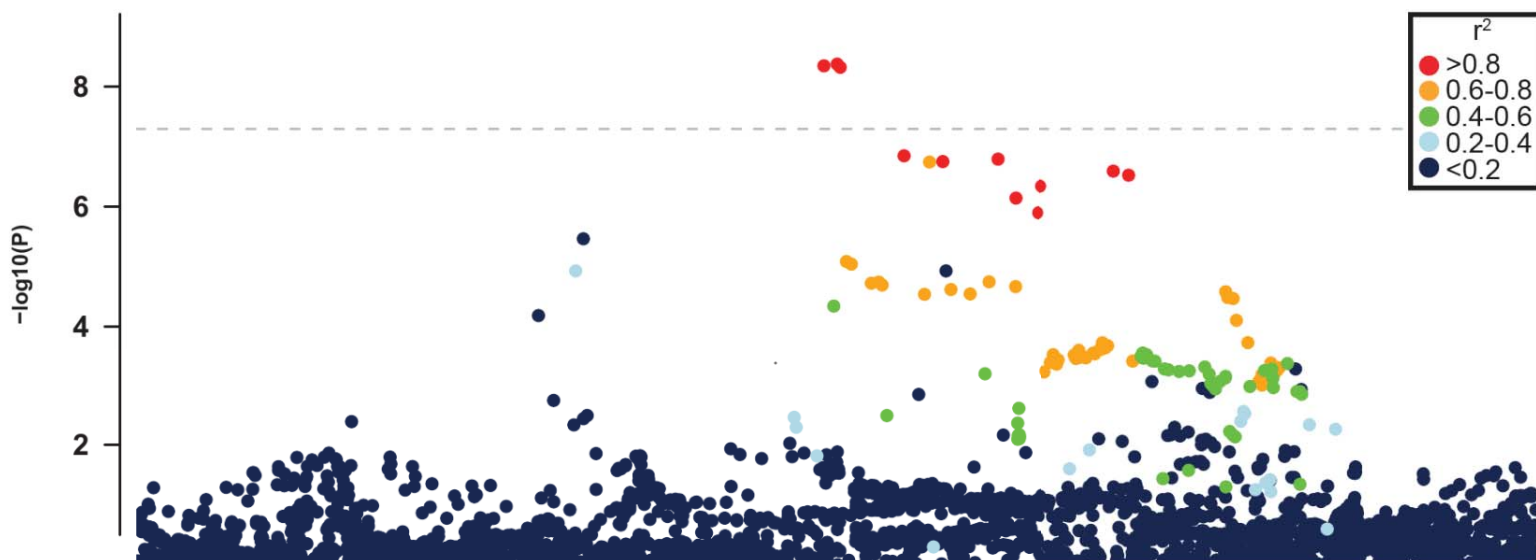

AXIN2

APOH

CEP112

GZ>CP

||

||

CP>GZ

|

Corrected for total SA

Uncorrected

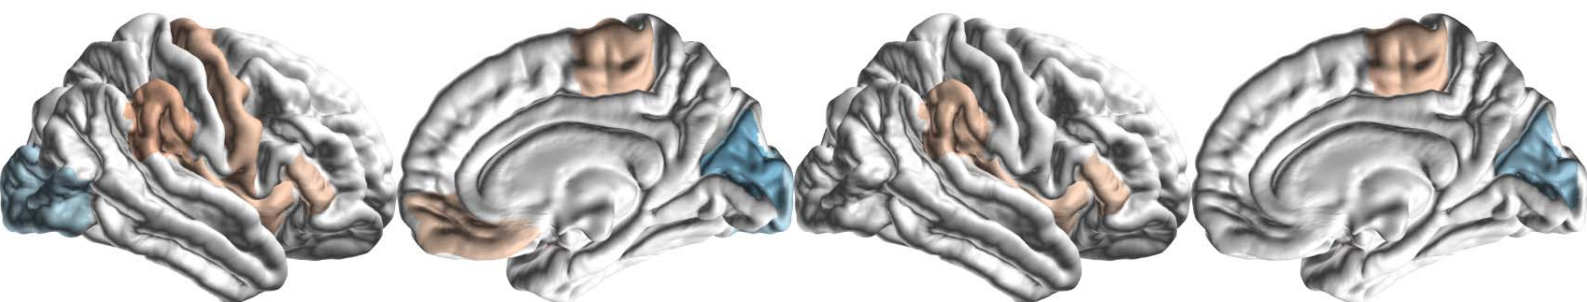

Zscore of the effect allele: A

-15 -10 -5 0 5 10 15



# Cuneus TH: rs78580207

Chromosome 14

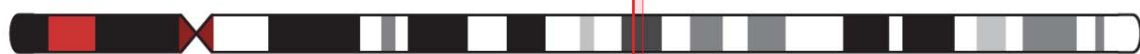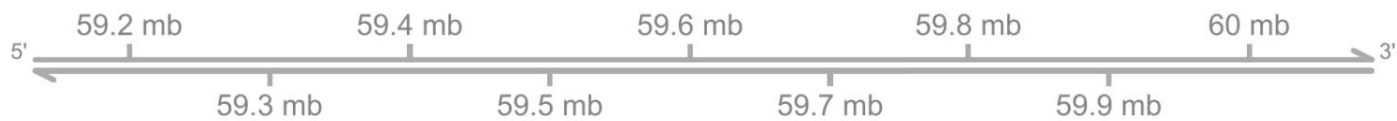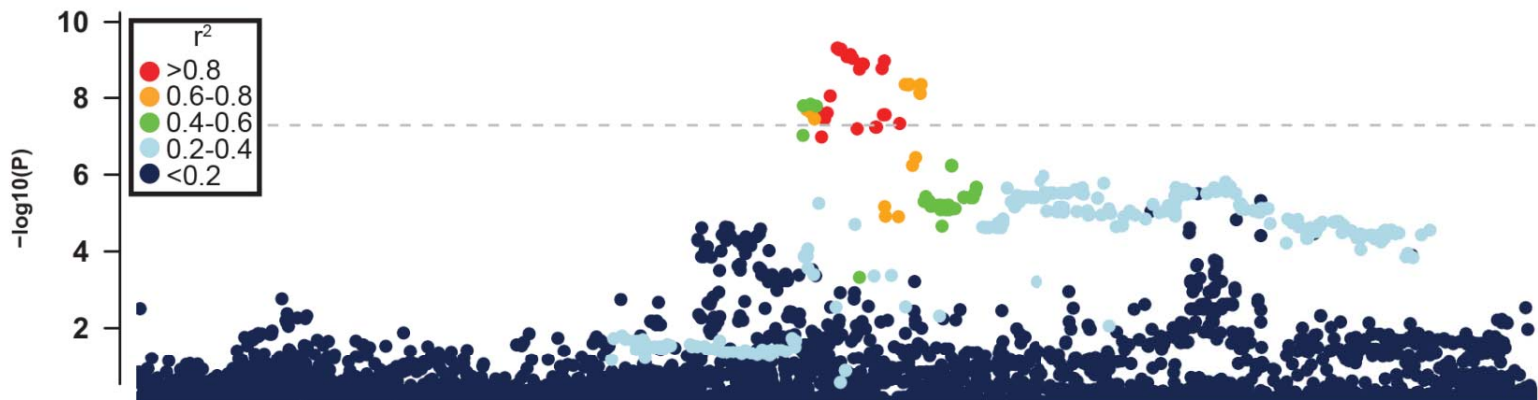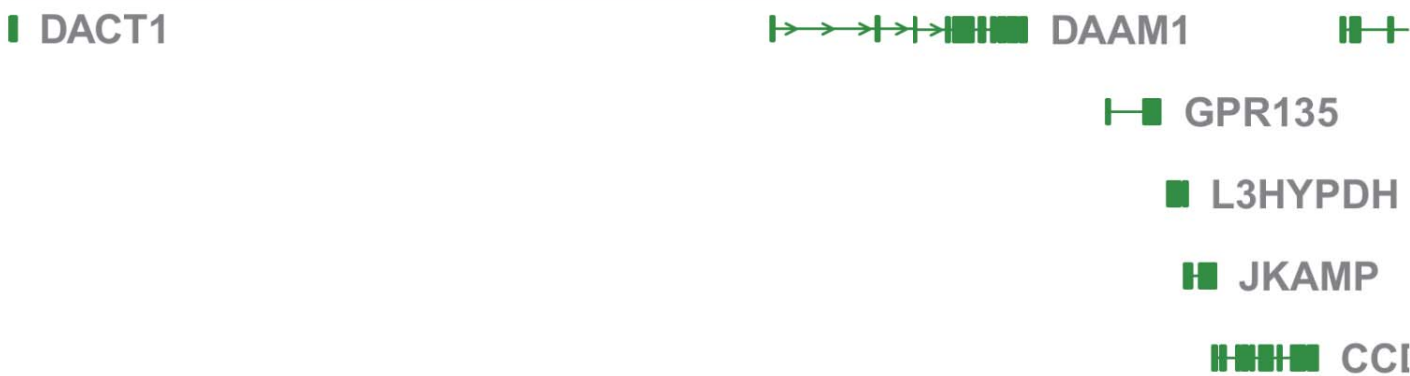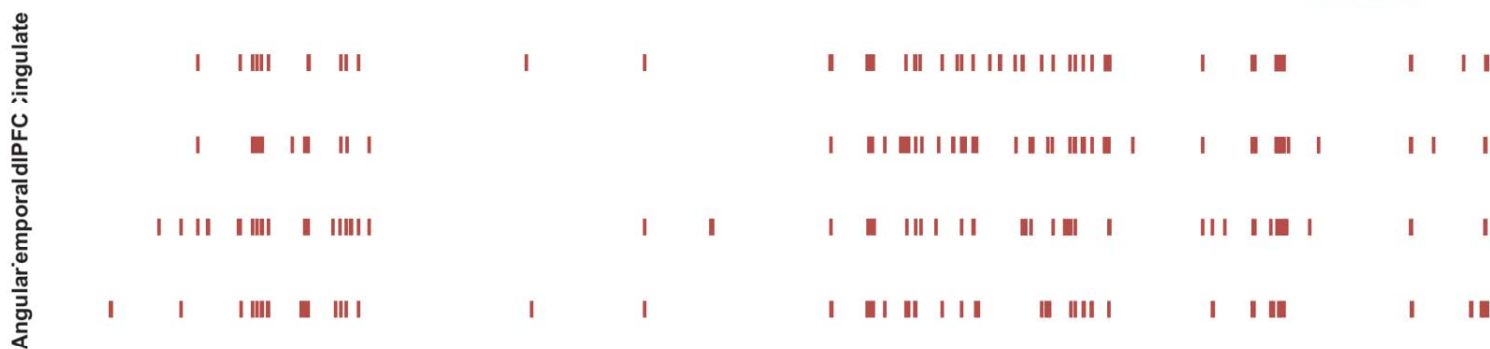

Corrected for average TH

Uncorrected

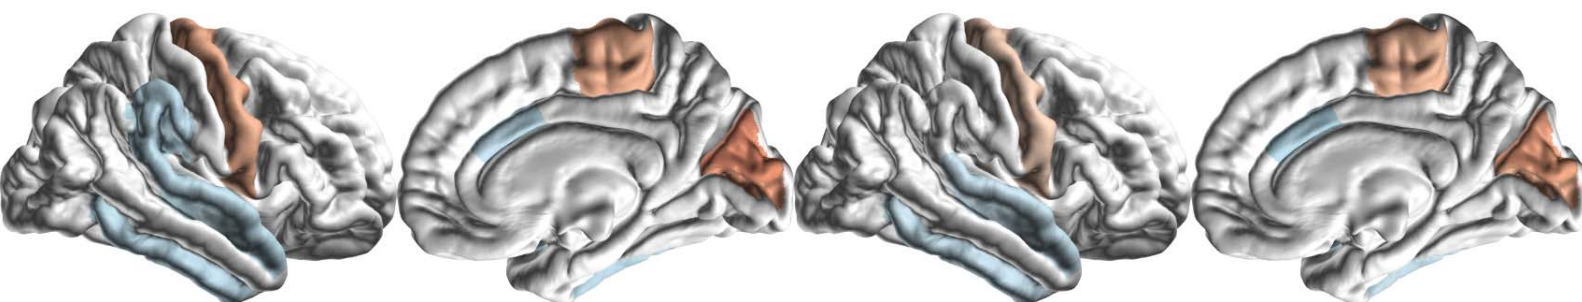

Zscore of the effect allele: A

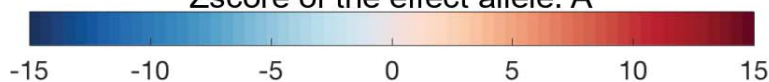

# Lateral Occipital SA: rs4953152

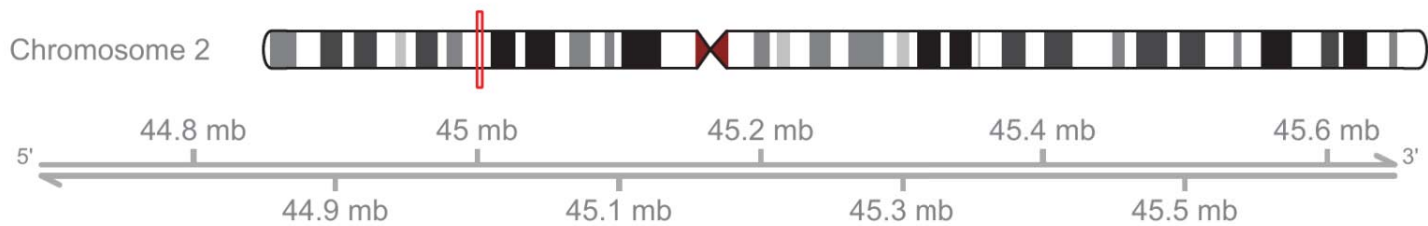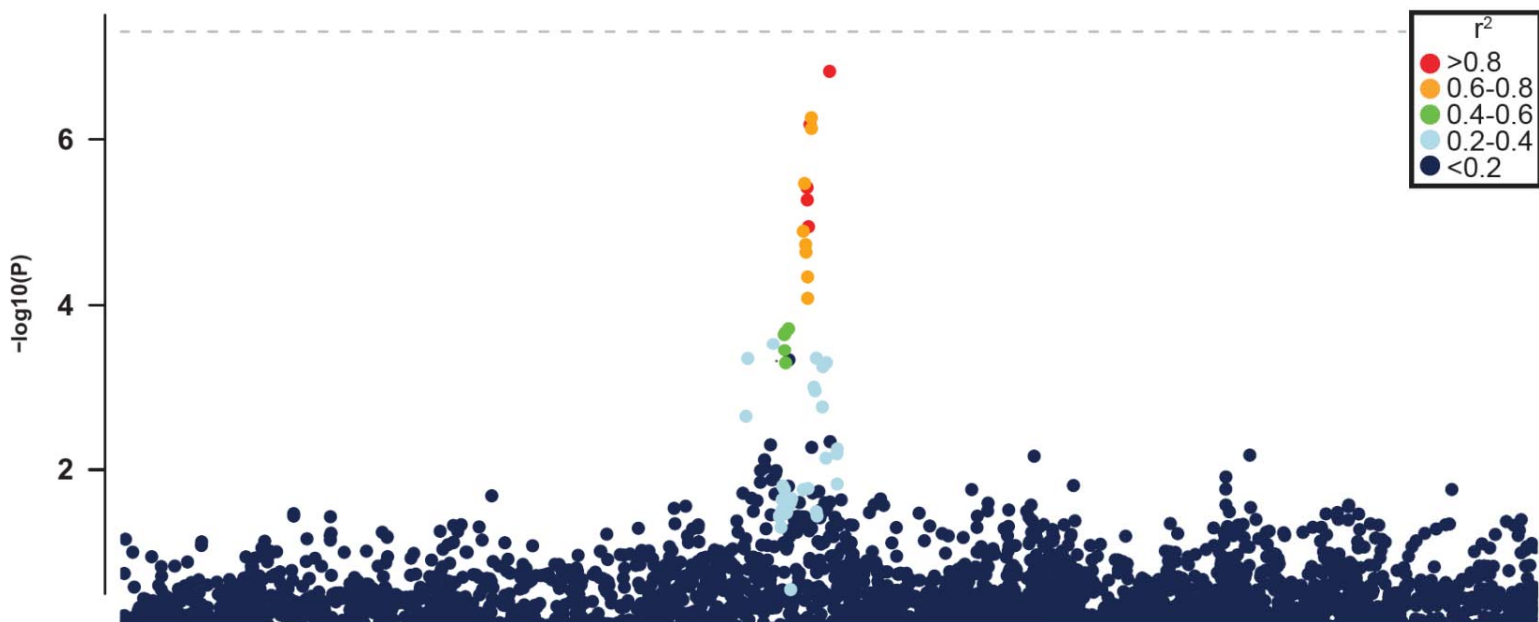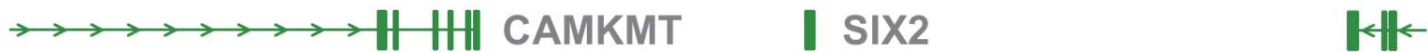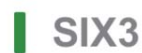

GZ>CP

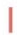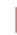

CP>GZ

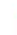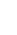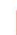

Corrected for total SA

Uncorrected

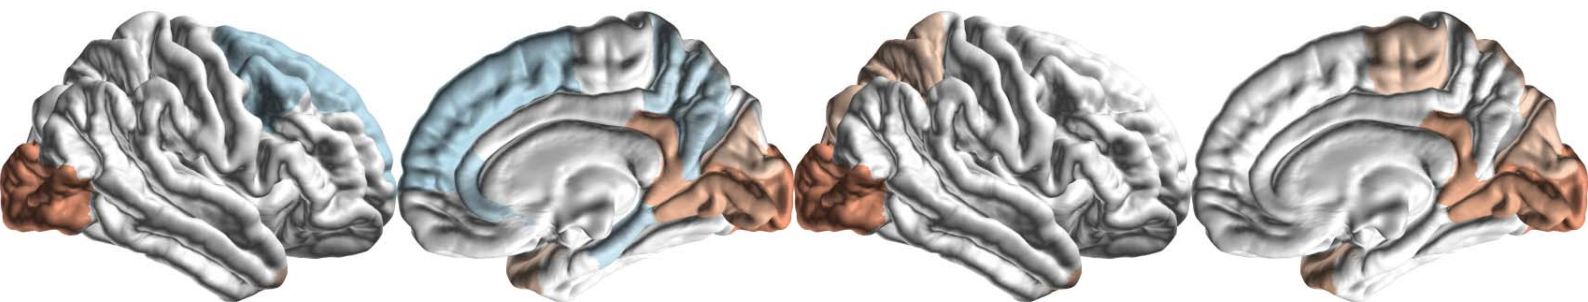

Zscore of the effect allele: A



# Lateral Occipital SA: rs9863836

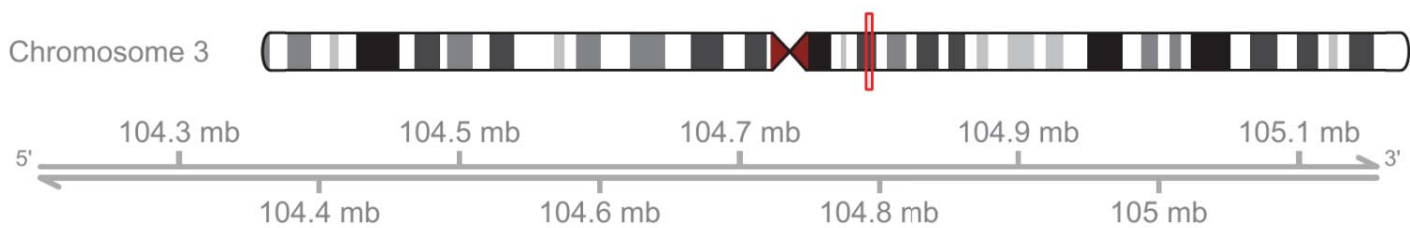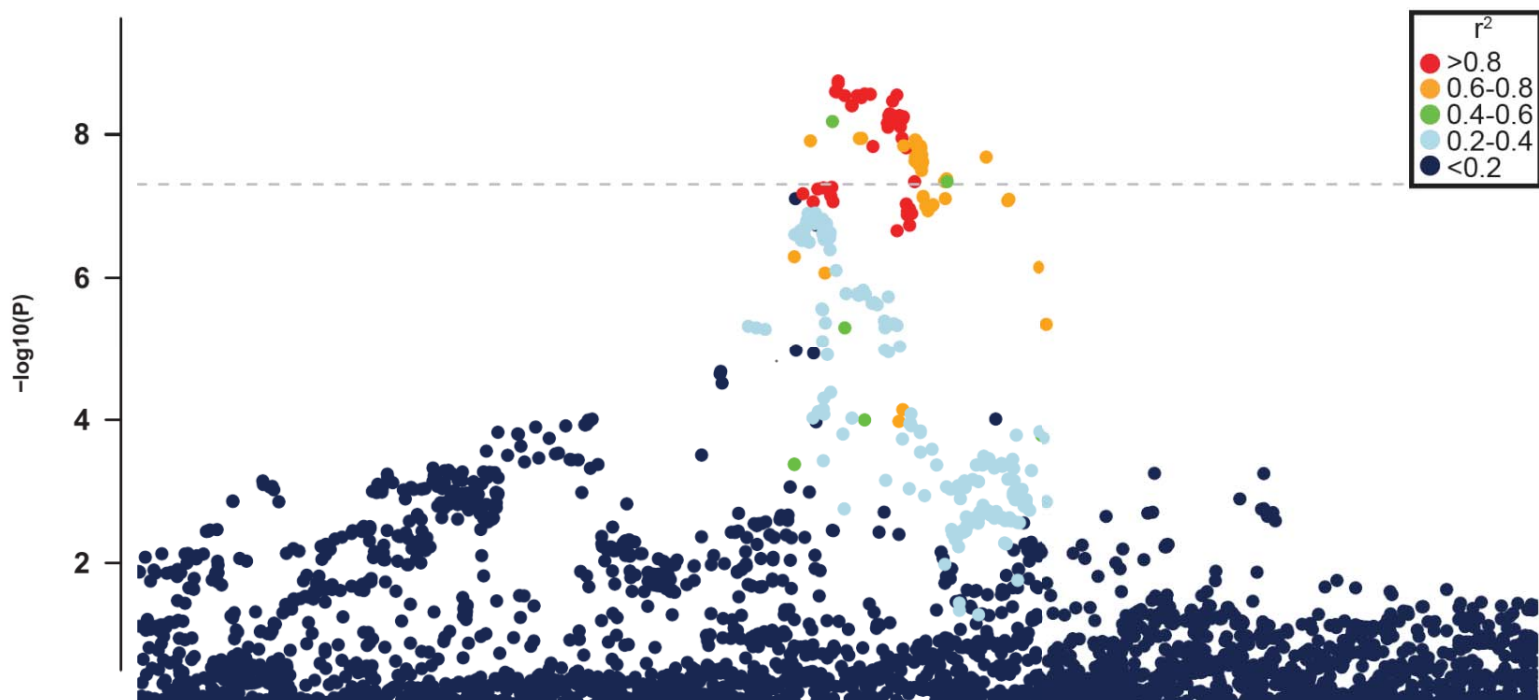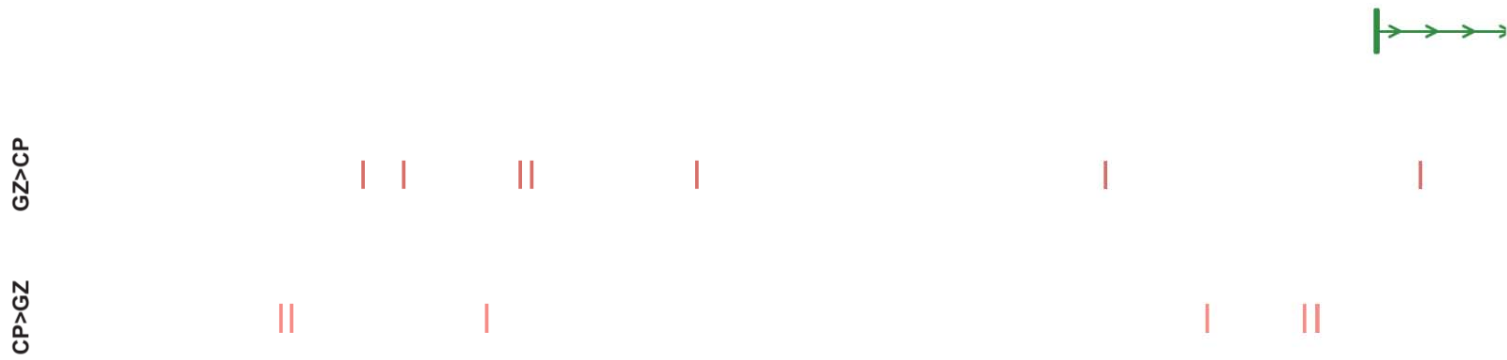

Corrected for total SA

Uncorrected

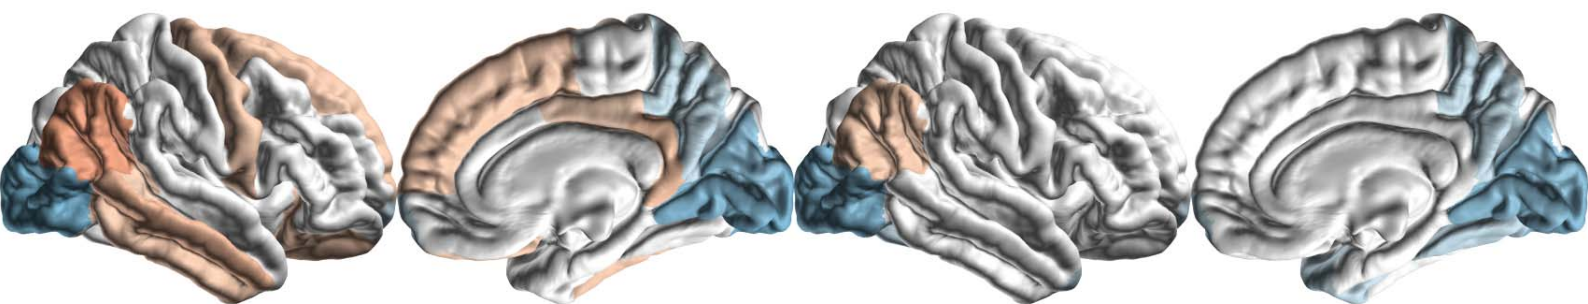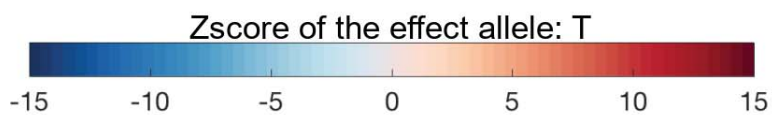



# Lateral Occipital SA: rs9813454

Chromosome 3

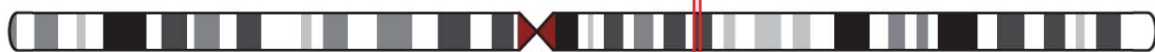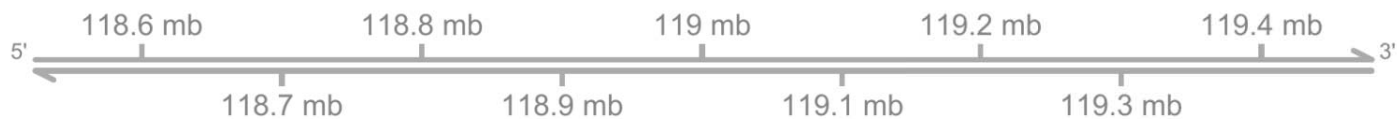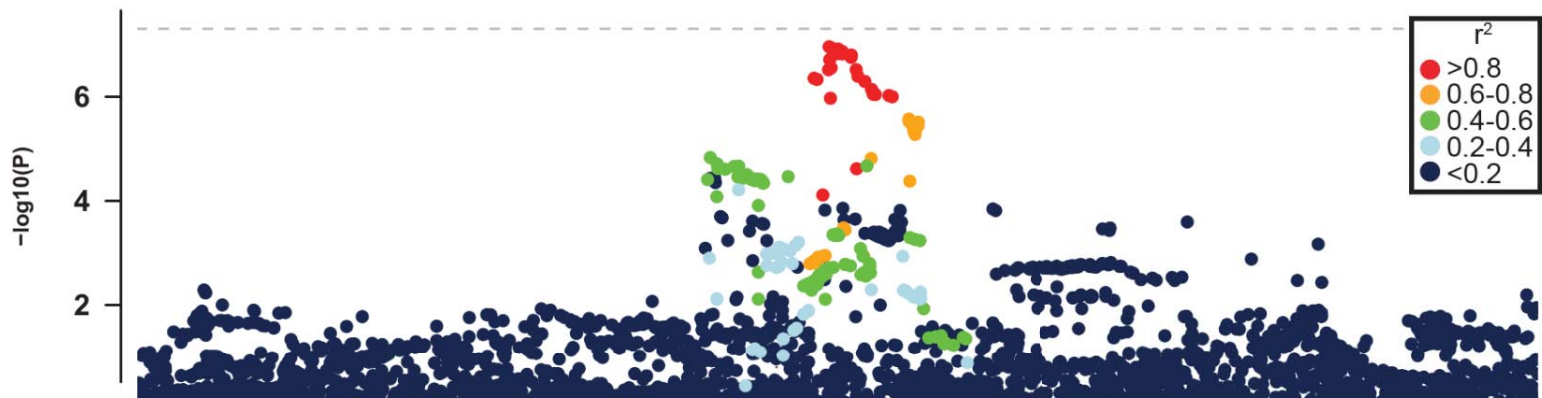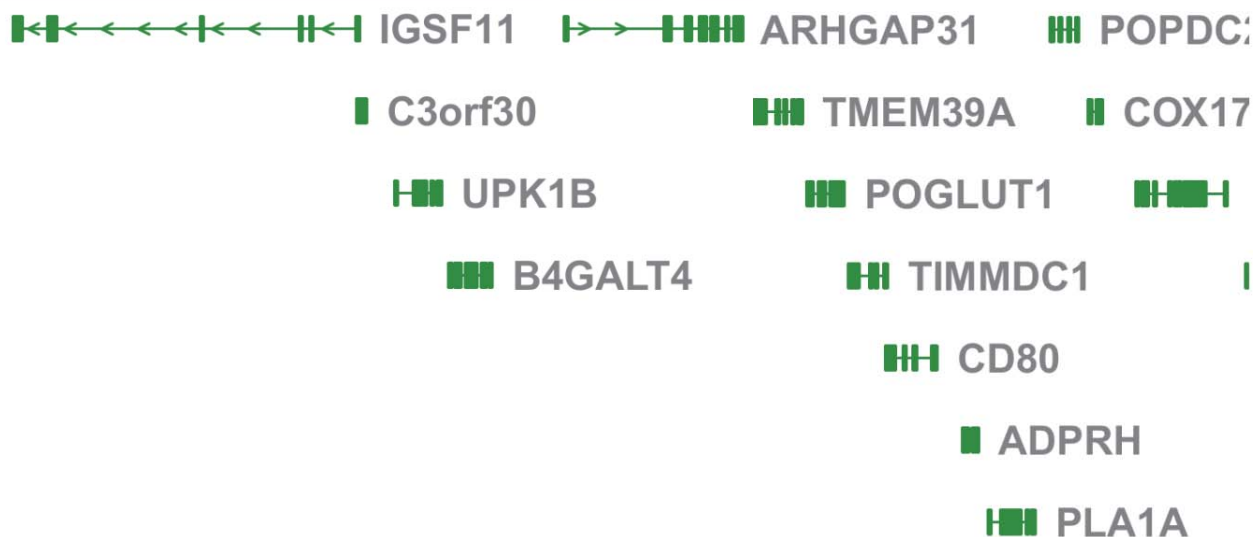

CP>GZ GZ>CP

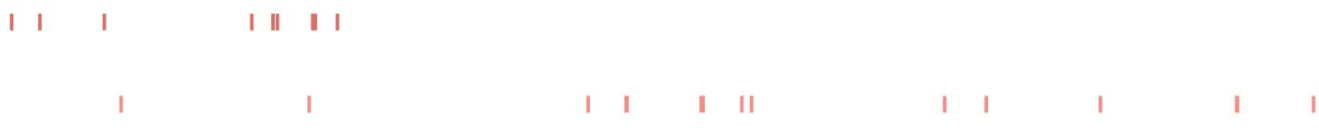

Corrected for total SA

Uncorrected

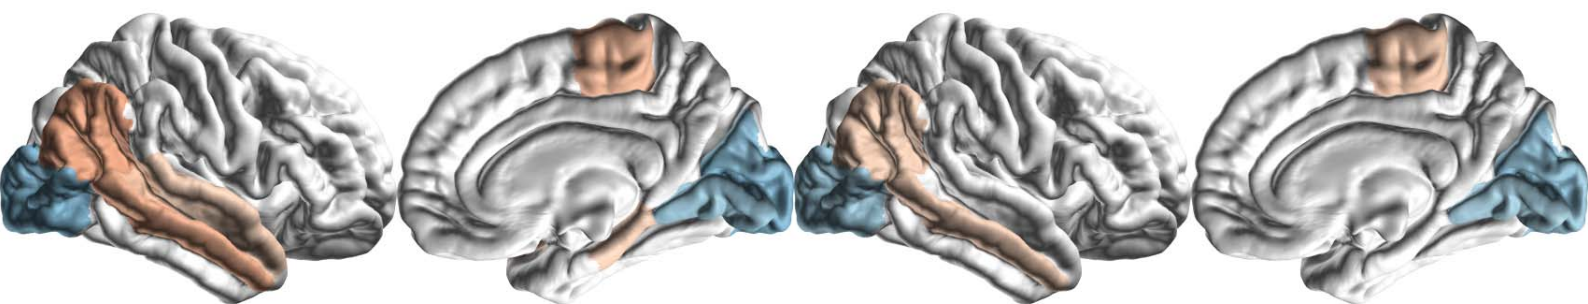

Zscore of the effect allele: T



# Lateral Occipital SA: rs552305

Chromosome 3

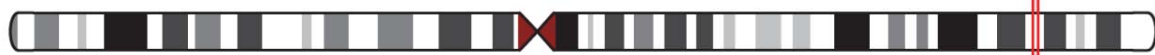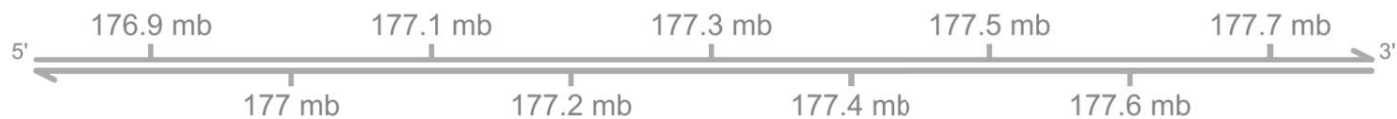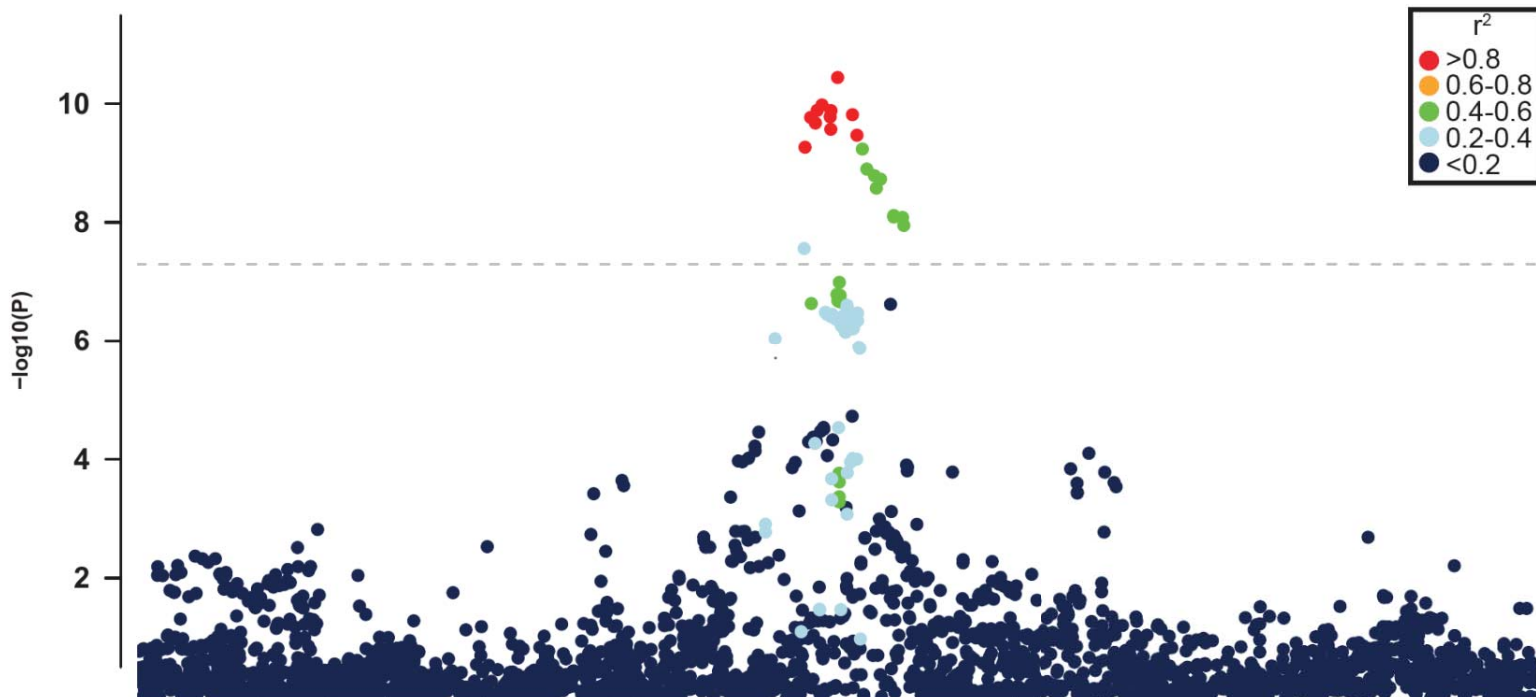

TBL1XR1

GZ>CP

CP>GZ

Corrected for total SA

Uncorrected

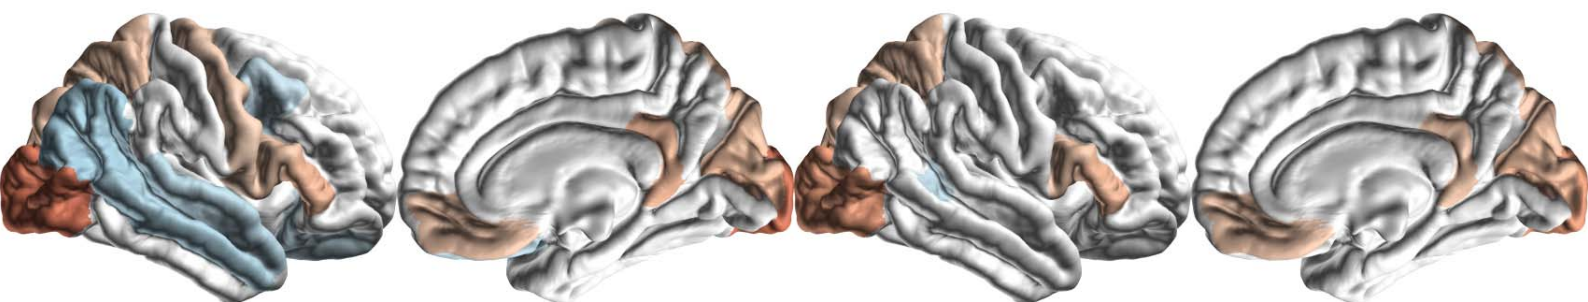

Zscore of the effect allele: T



# Lateral Occipital SA: rs9401907

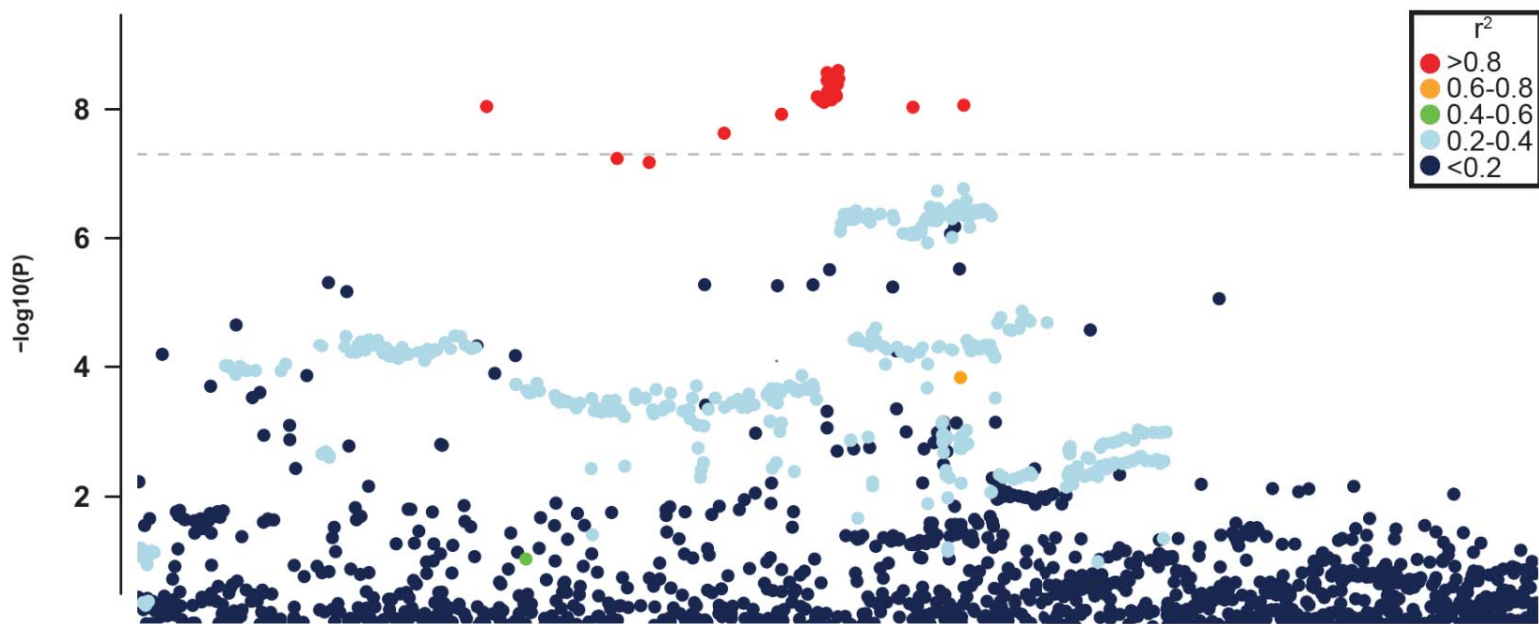

CENPW

RSP

GZ>CP  
CP>GZ

Corrected for total SA

Uncorrected



Zscore of the effect allele: T





# Lateral Occipital SA: rs28504650

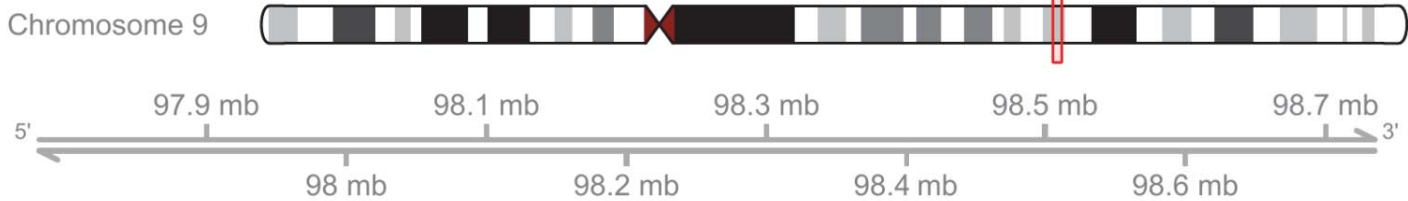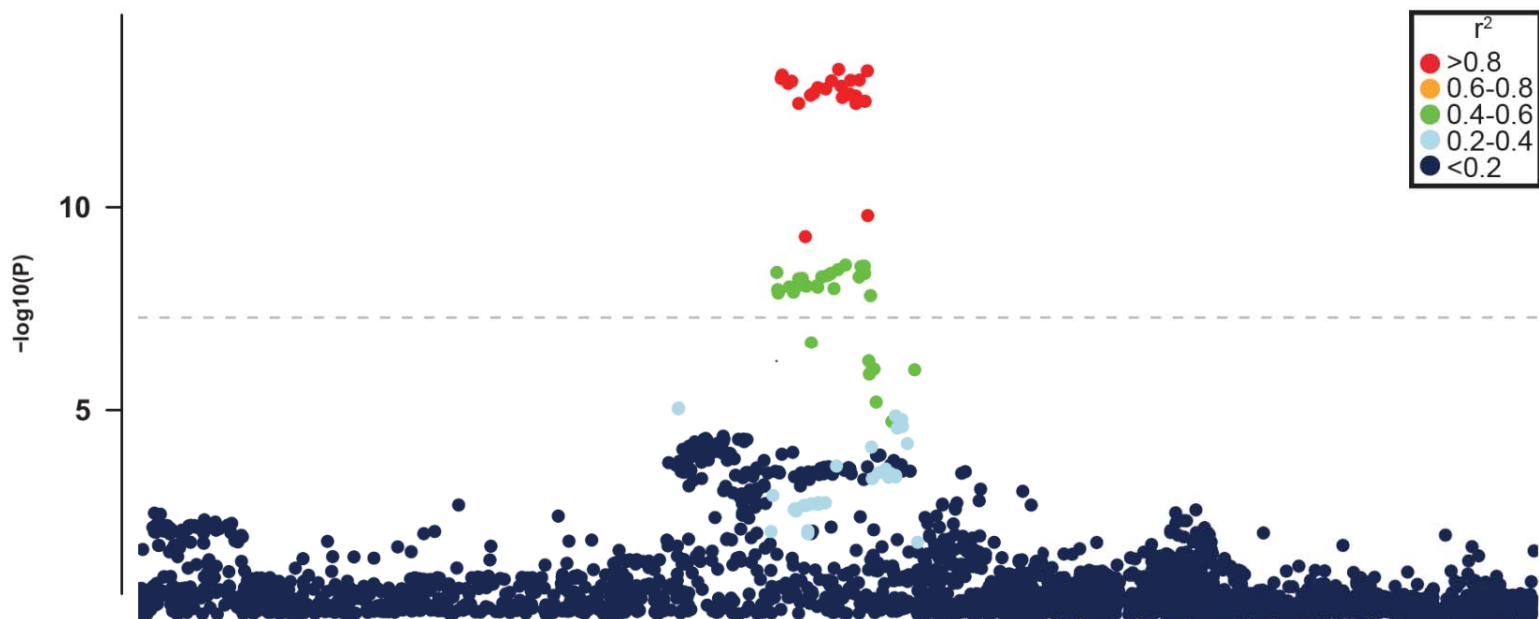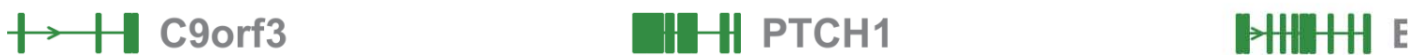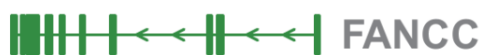

GZ>CP

CP>GZ

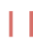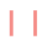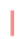

Corrected for total SA

Uncorrected

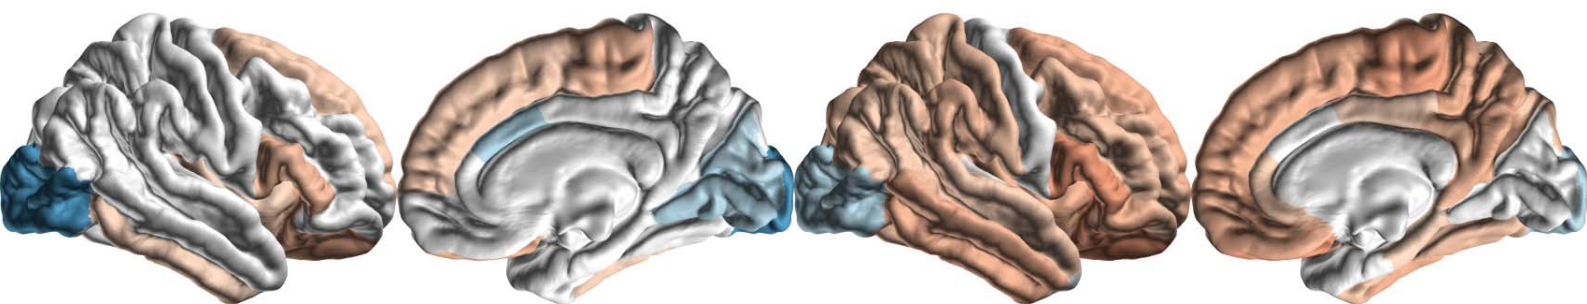

Zscore of the effect allele: T



# Lateral Occipital SA: rs74826997

Chromosome 14

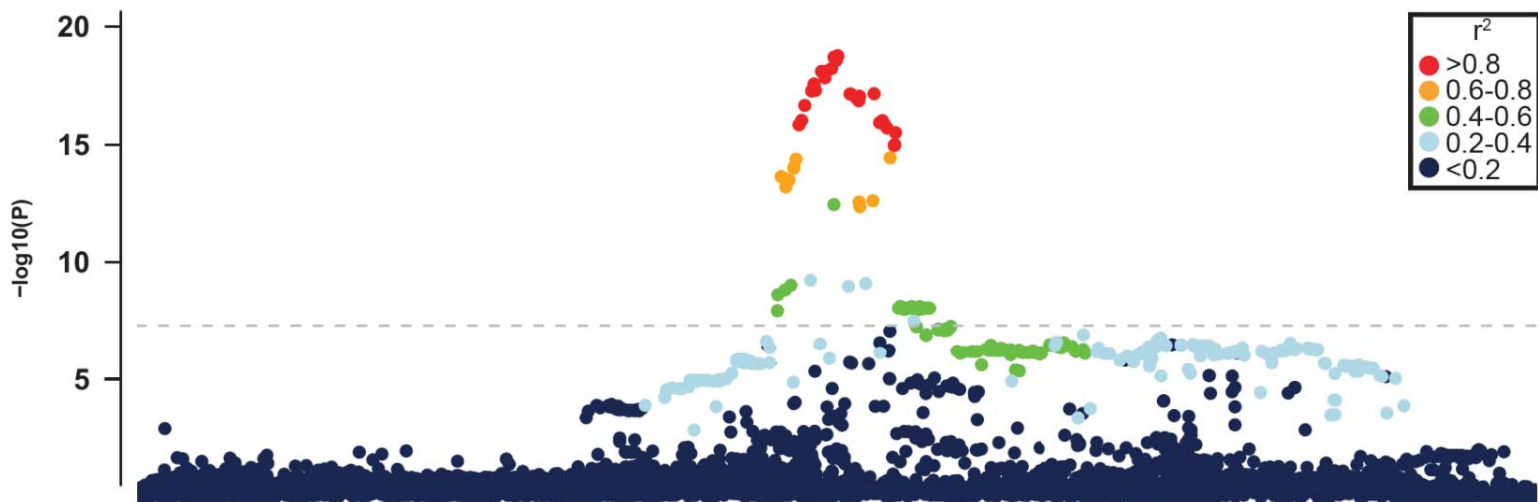

GPR135

JKAMP

CCDC

CP>GZ  
GZ>CP

Corrected for total SA

Uncorrected

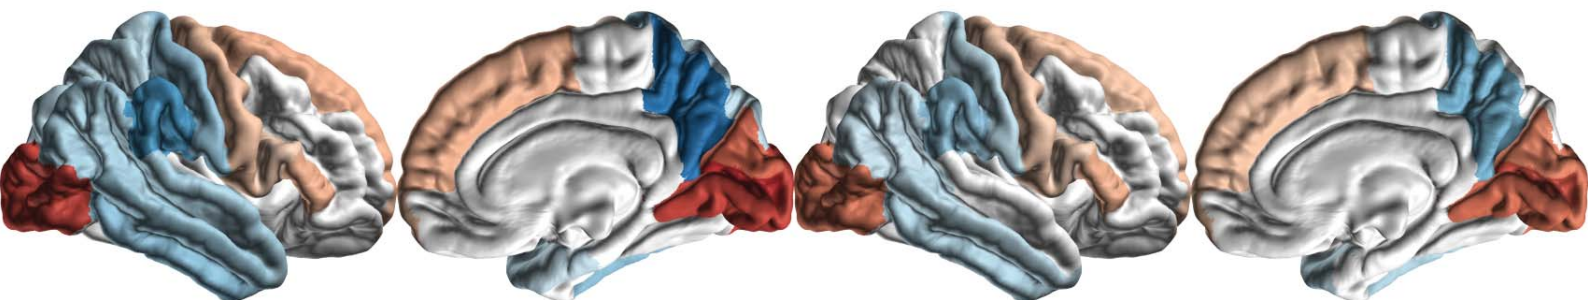

Zscore of the effect allele: T



Supplement: Supplementary file [file 399402-8.pdf]
