# Supplementary material for: The genetic architecture of the human cerebral cortex
Source: bioRxiv or medRxiv preprint supplement (doi:10.1101/399402), 2019-07-18

**Manhattan plots - within each plot, the Manhattan plot for surface area is shown above the x axis and the Manhattan plot for thickness is shown below.**

| <b>Region#</b> | <b>Phenotype</b>                      | <b>Page</b> |
|----------------|---------------------------------------|-------------|
| 0              | Global                                | 2           |
| 1              | Frontal Pole                          | 3           |
| 2              | Medial Orbitofrontal                  | 4           |
| 3              | Lateral Orbitofrontal                 | 5           |
| 4              | Rostral Anterior Cingulate            | 6           |
| 5              | Caudal Anterior Cingulate             | 7           |
| 6              | Superior Frontal                      | 8           |
| 7              | Rostral Middle Frontal                | 9           |
| 8              | Pars Orbitalis                        | 10          |
| 9              | Pars Triangularis                     | 11          |
| 10             | Pars Opercularis                      | 12          |
| 11             | Caudal Middle Frontal                 | 13          |
| 12             | Paracentral                           | 14          |
| 13             | Precentral                            | 15          |
| 14             | Postcentral                           | 16          |
| 15             | Precuneus                             | 17          |
| 16             | Superior Parietal                     | 18          |
| 17             | Supramarginal                         | 19          |
| 18             | Inferior Parietal                     | 20          |
| 19             | Posterior Cingulate                   | 21          |
| 20             | Isthmus Cingulate                     | 22          |
| 21             | Insula                                | 23          |
| 22             | Entorhinal                            | 24          |
| 23             | Parahippocampal                       | 25          |
| 24             | Fusiform                              | 26          |
| 25             | Temporal Pole                         | 27          |
| 26             | Inferior Temporal                     | 28          |
| 27             | Middle Temporal                       | 29          |
| 28             | Superior Temporal                     | 30          |
| 29             | Banks of the Superior Temporal Sulcus | 31          |
| 30             | Transverse Temporal                   | 32          |
| 31             | Lingual                               | 33          |
| 32             | Pericalcarine                         | 34          |
| 33             | Cuneus                                | 35          |
| 34             | Lateral Occipital                     | 36          |

# Global

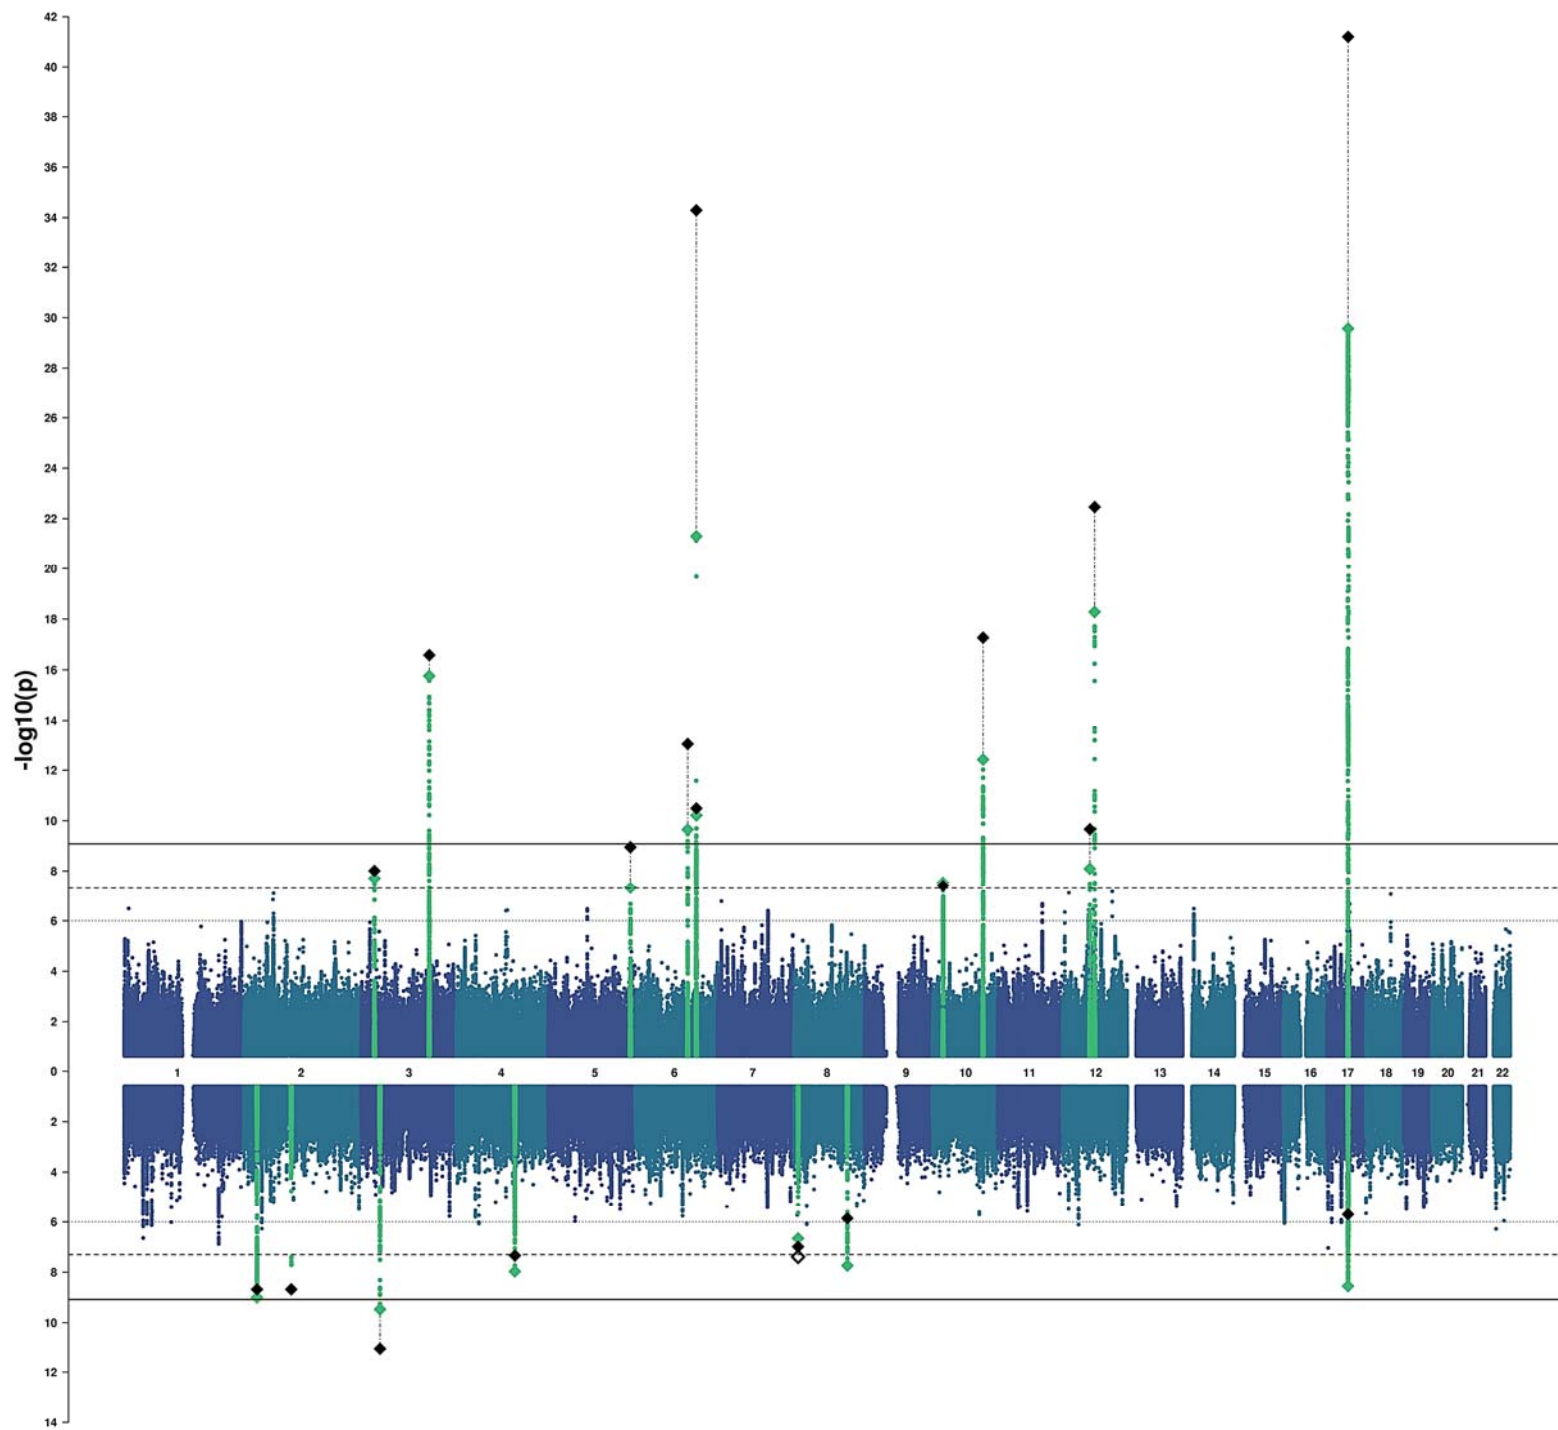

# Frontal Pole

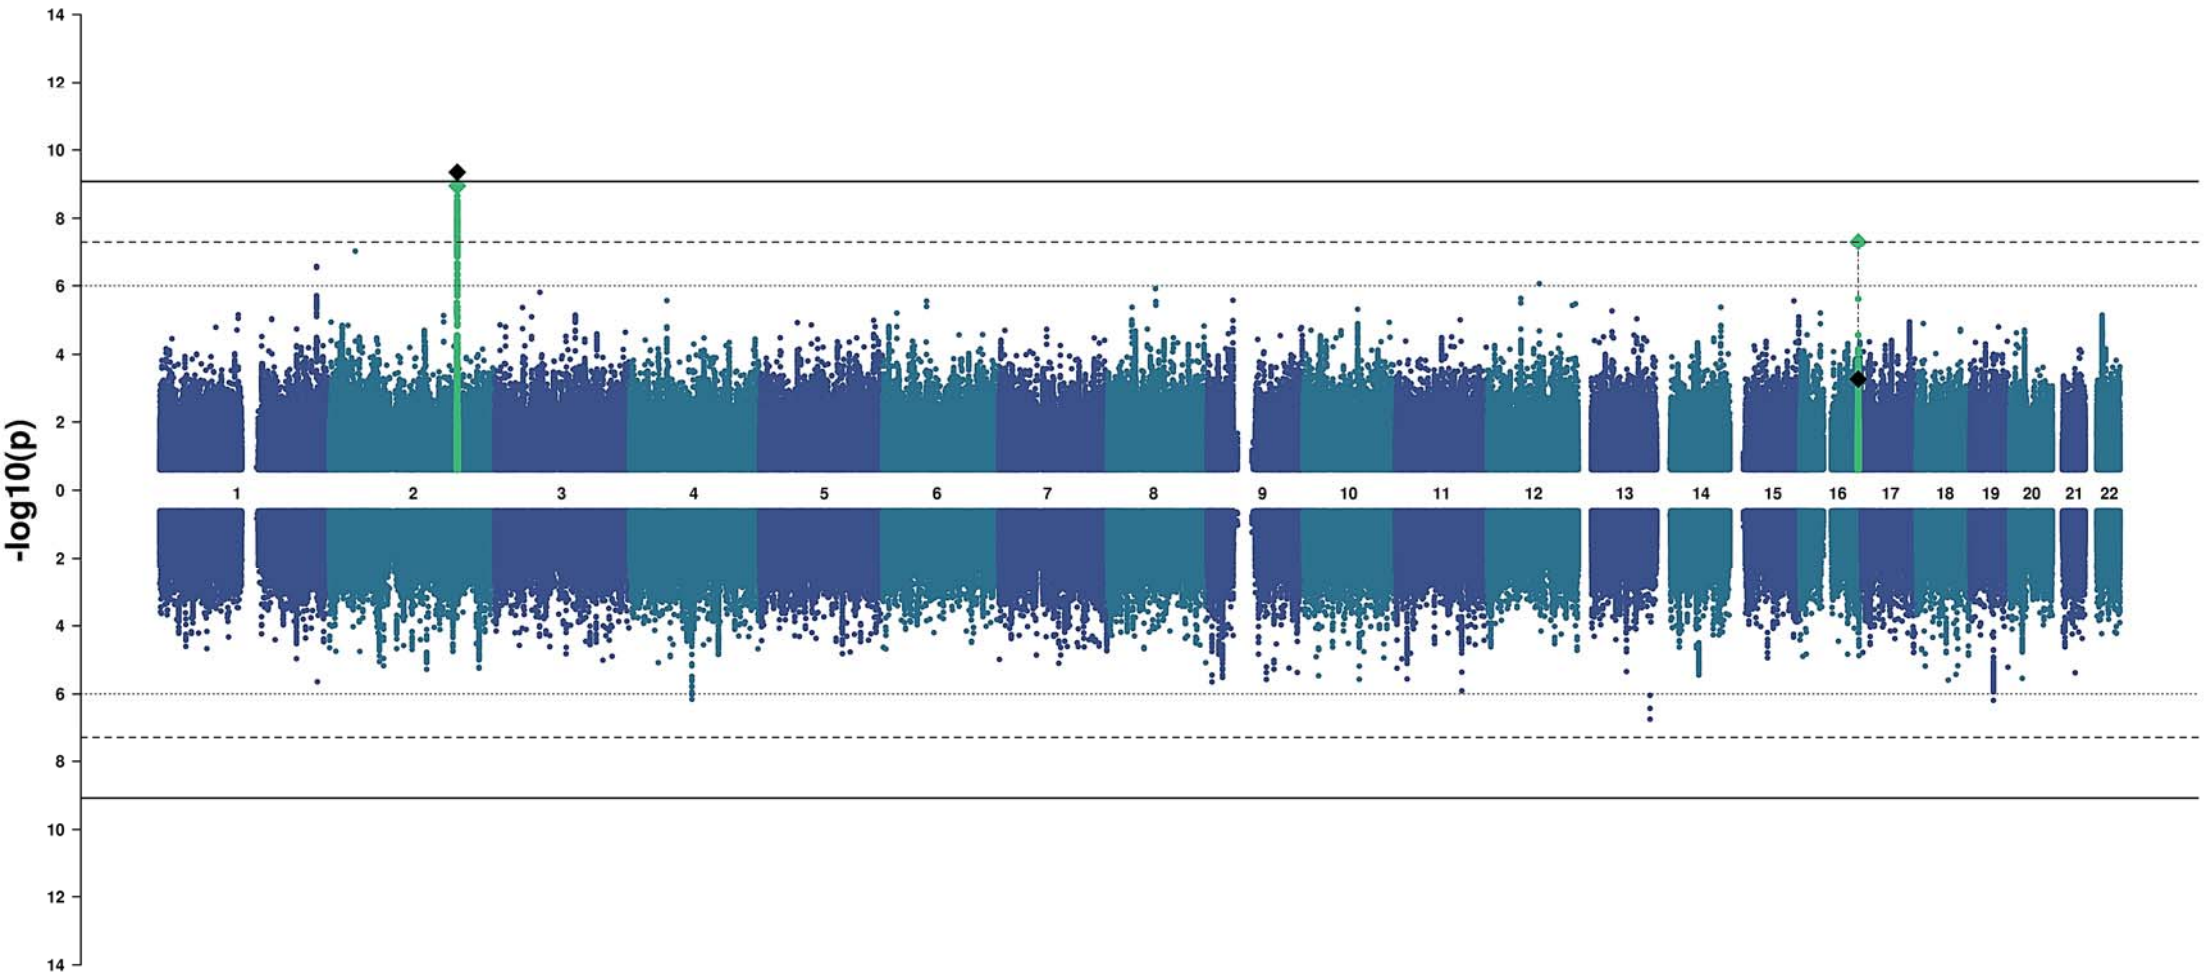

# Medial Orbitofrontal

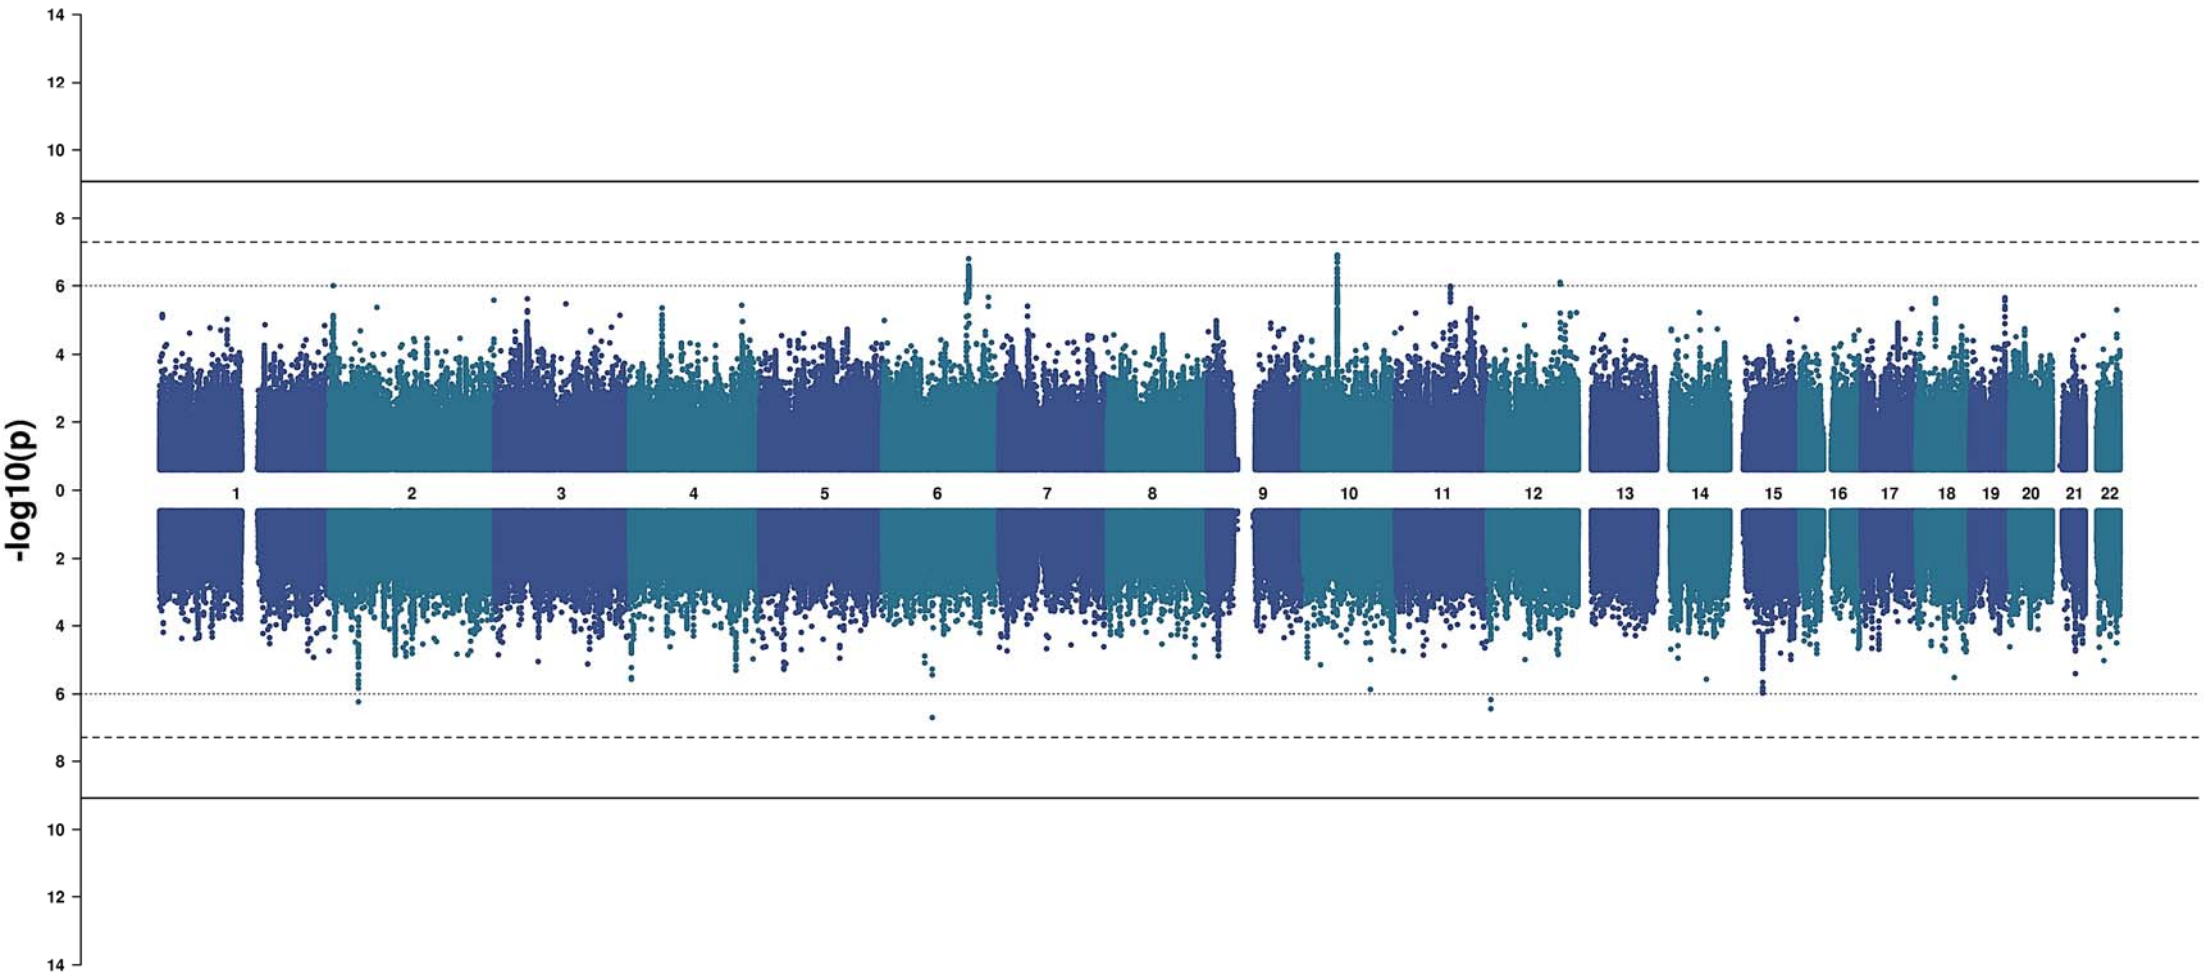

# Lateral Orbitofrontal

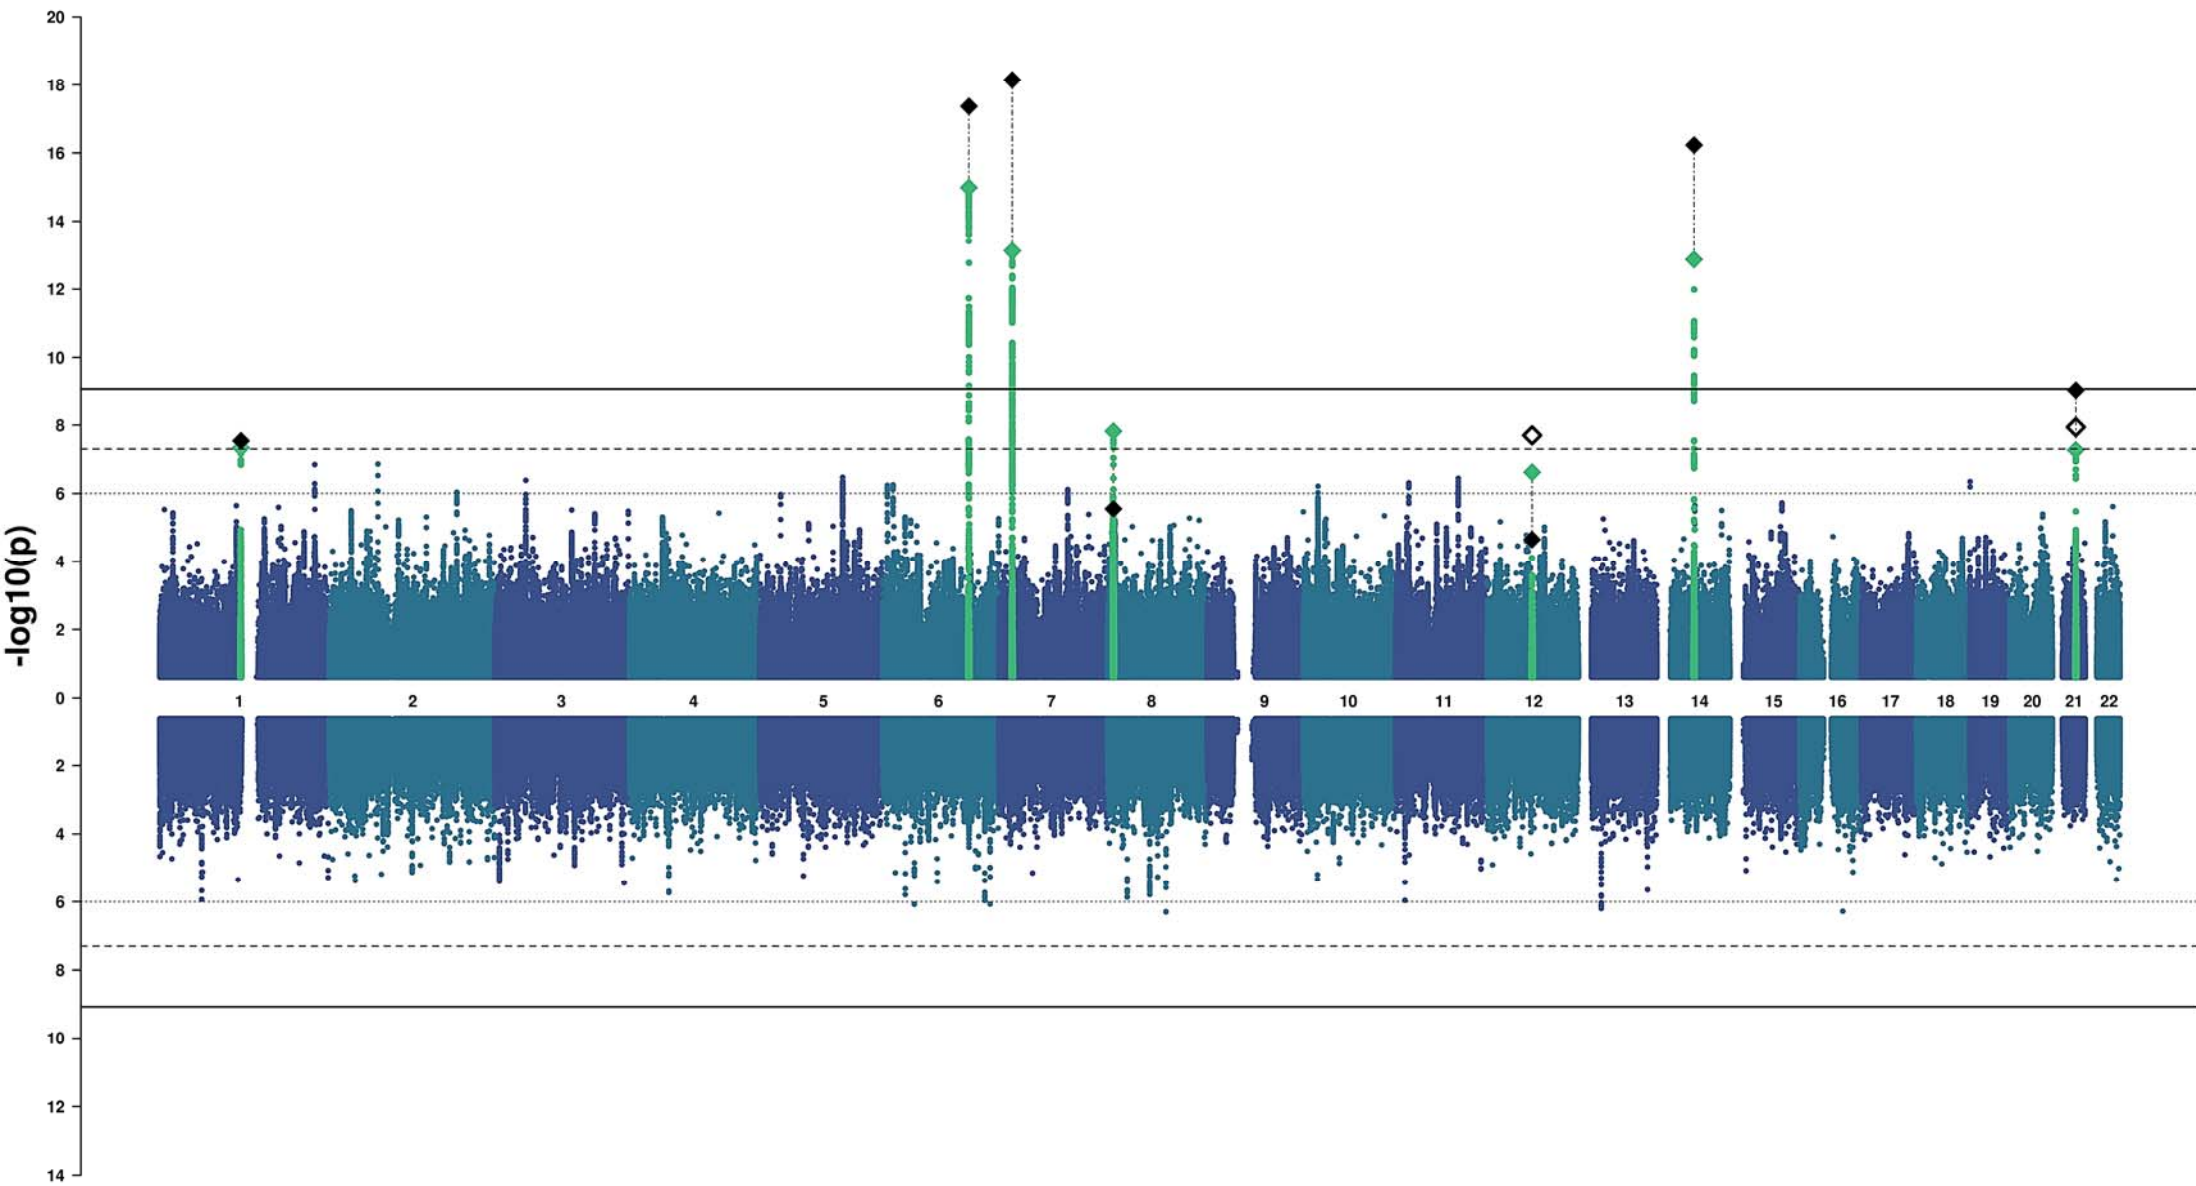



# Rostral Anterior Cingulate

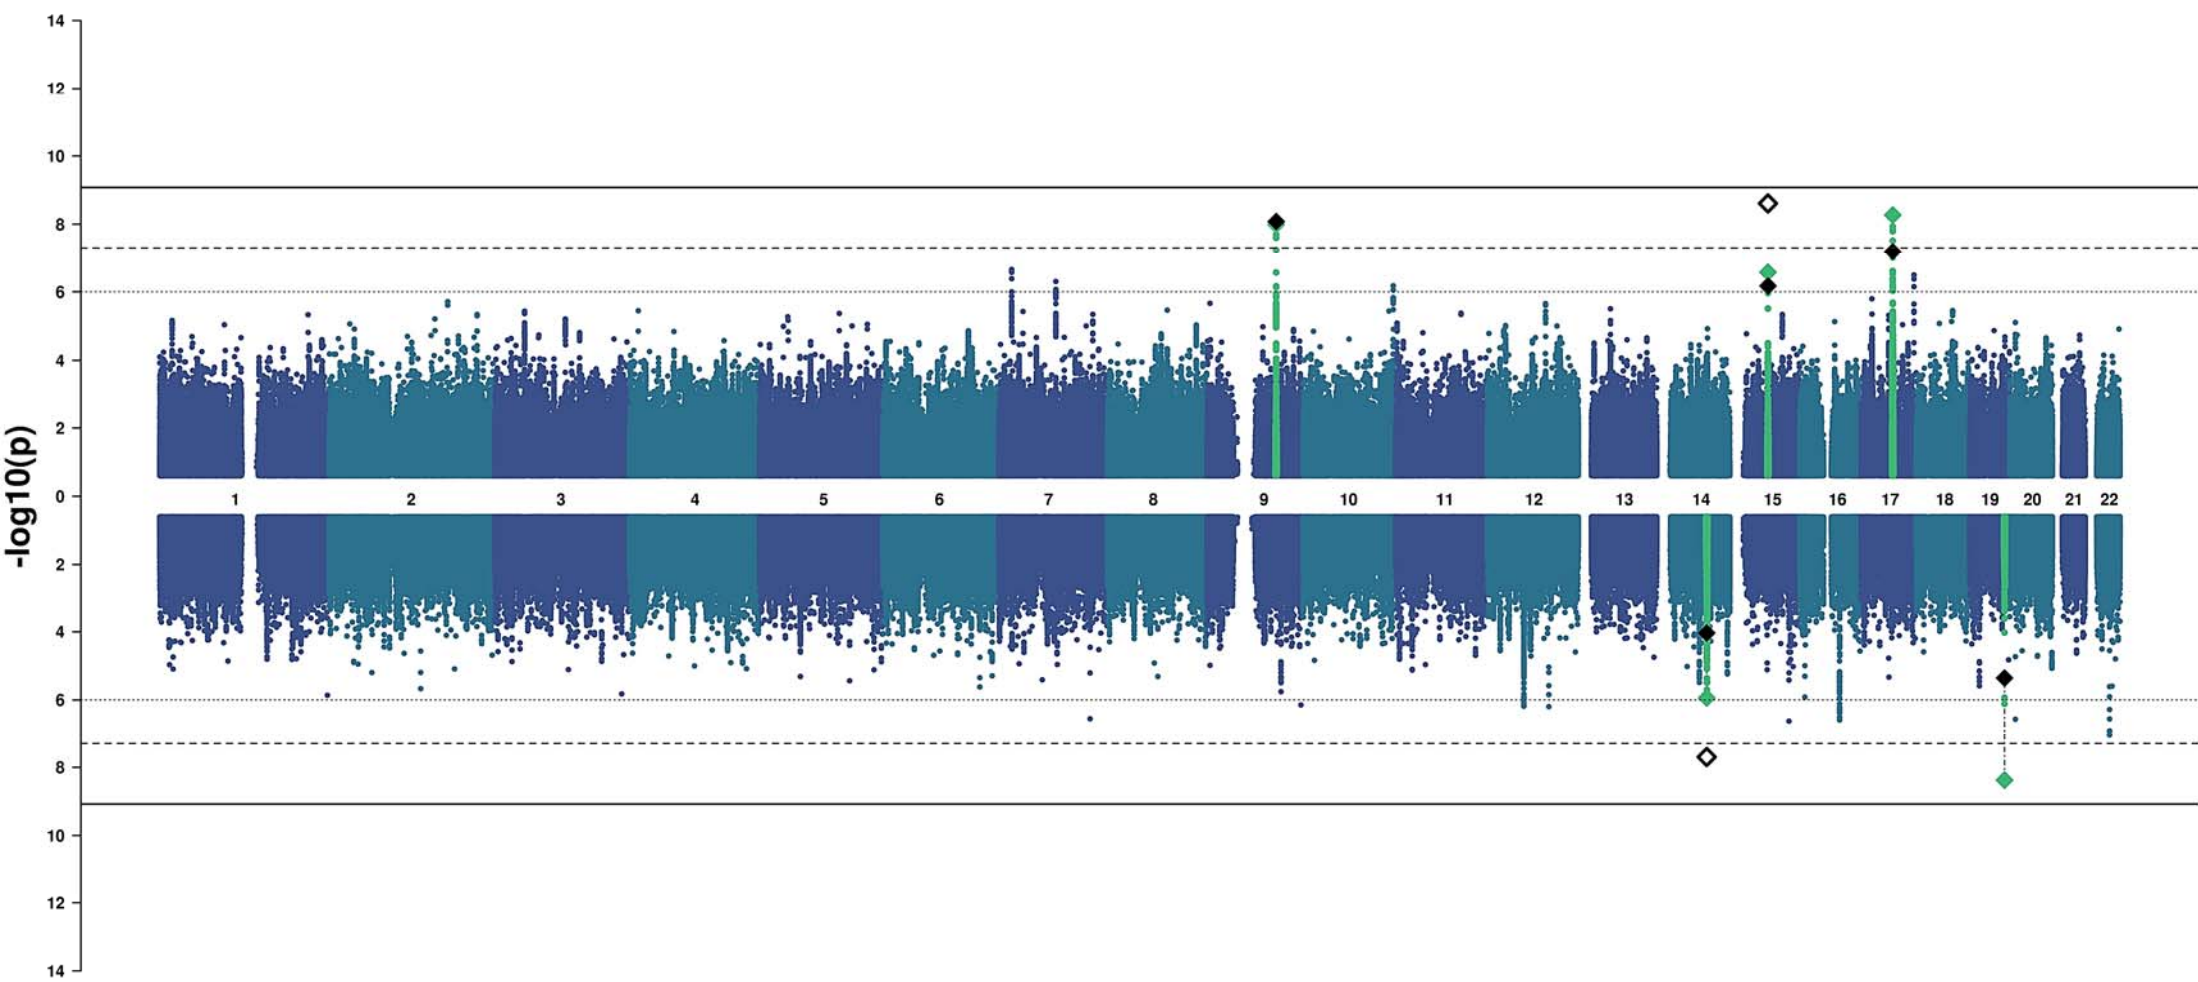

# Caudal Anterior Cingulate

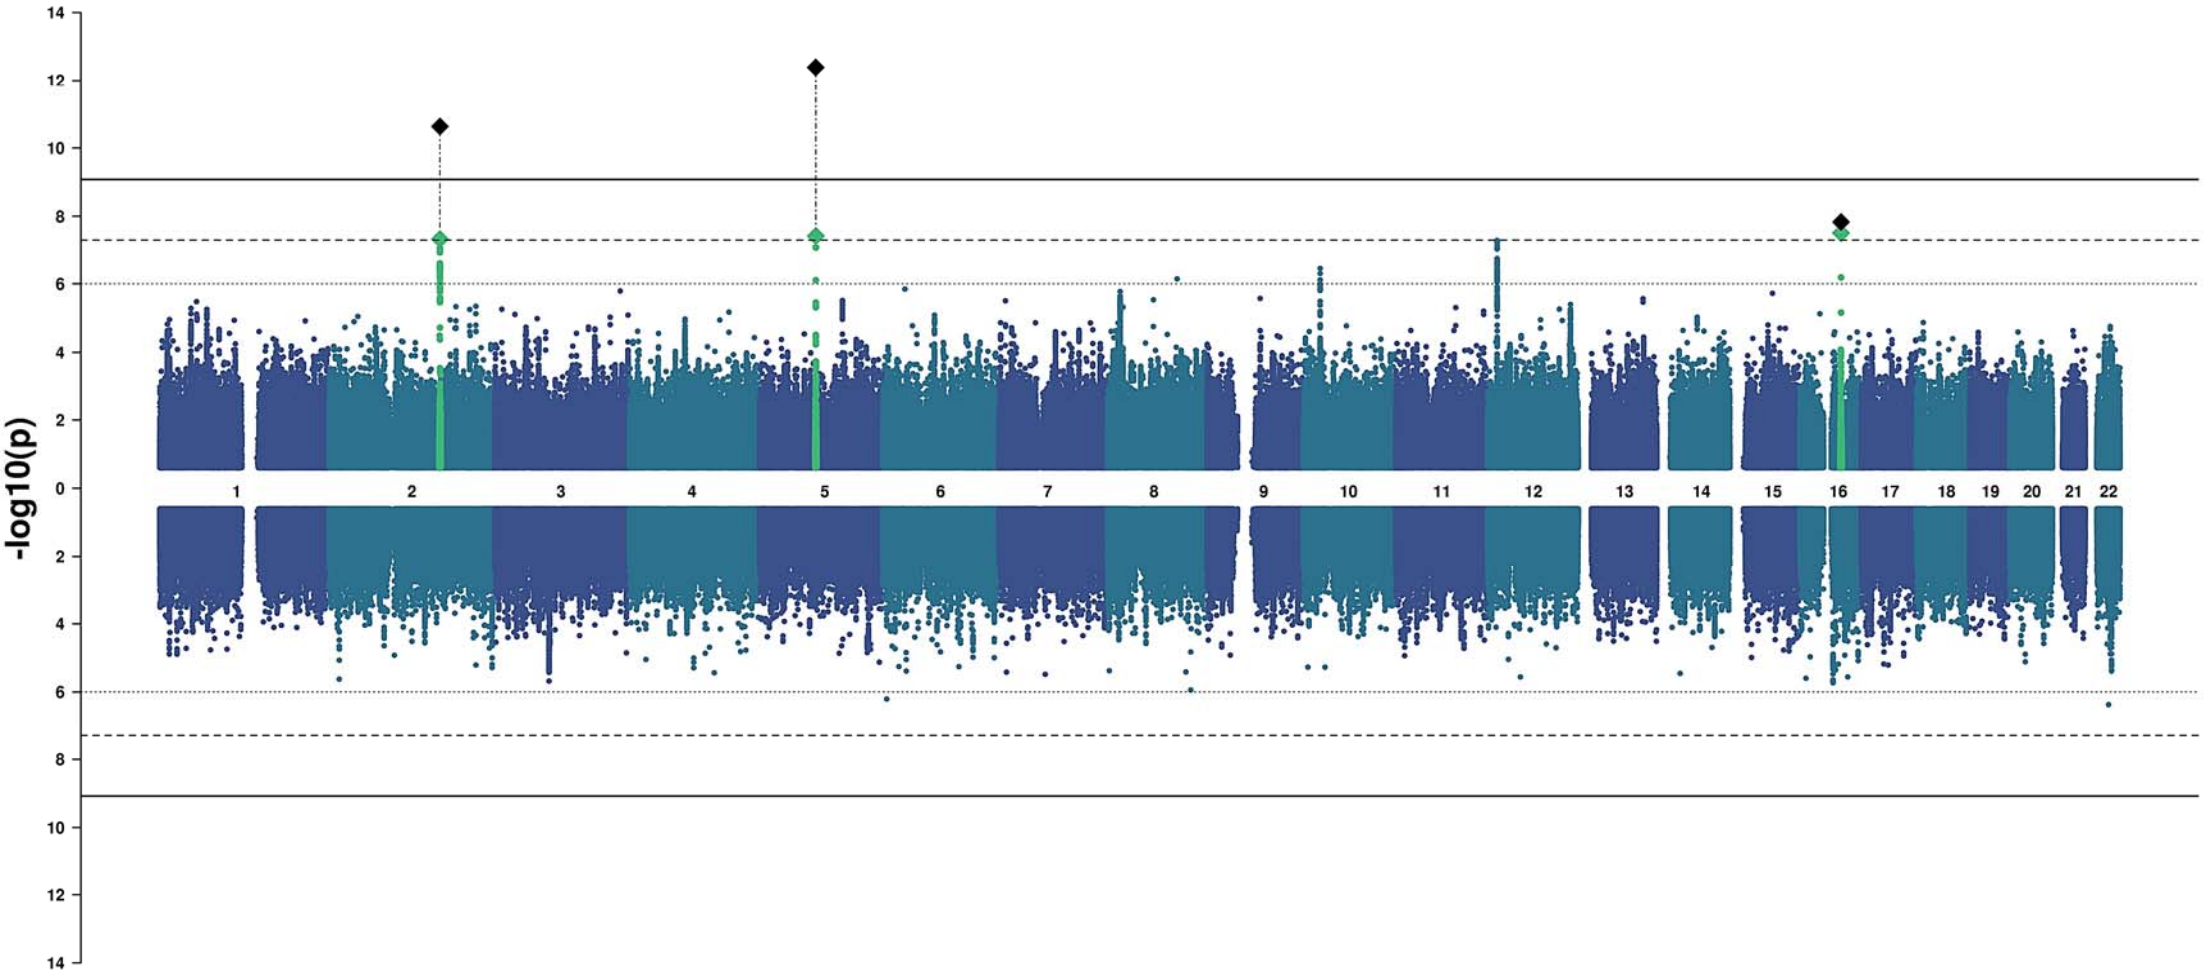

# Superior Frontal

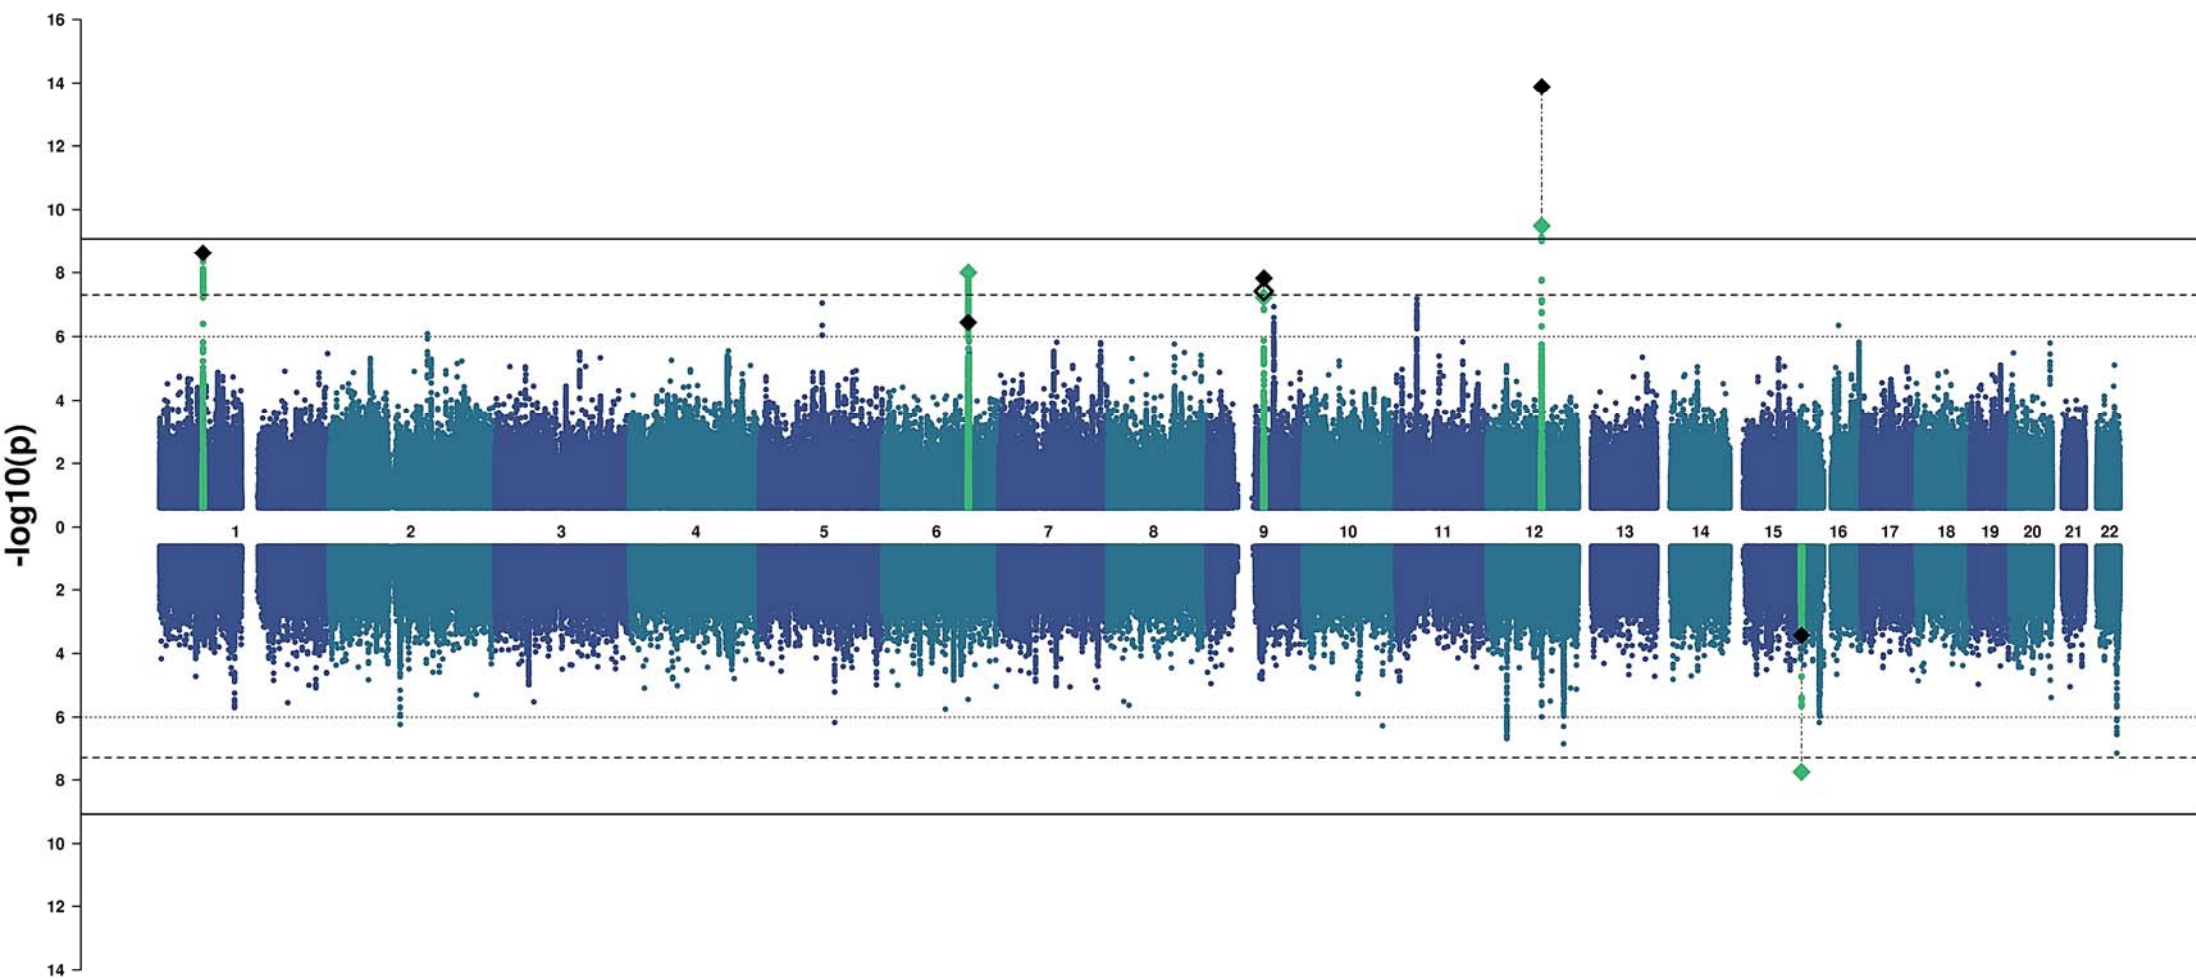



# Rostral Middle Frontal

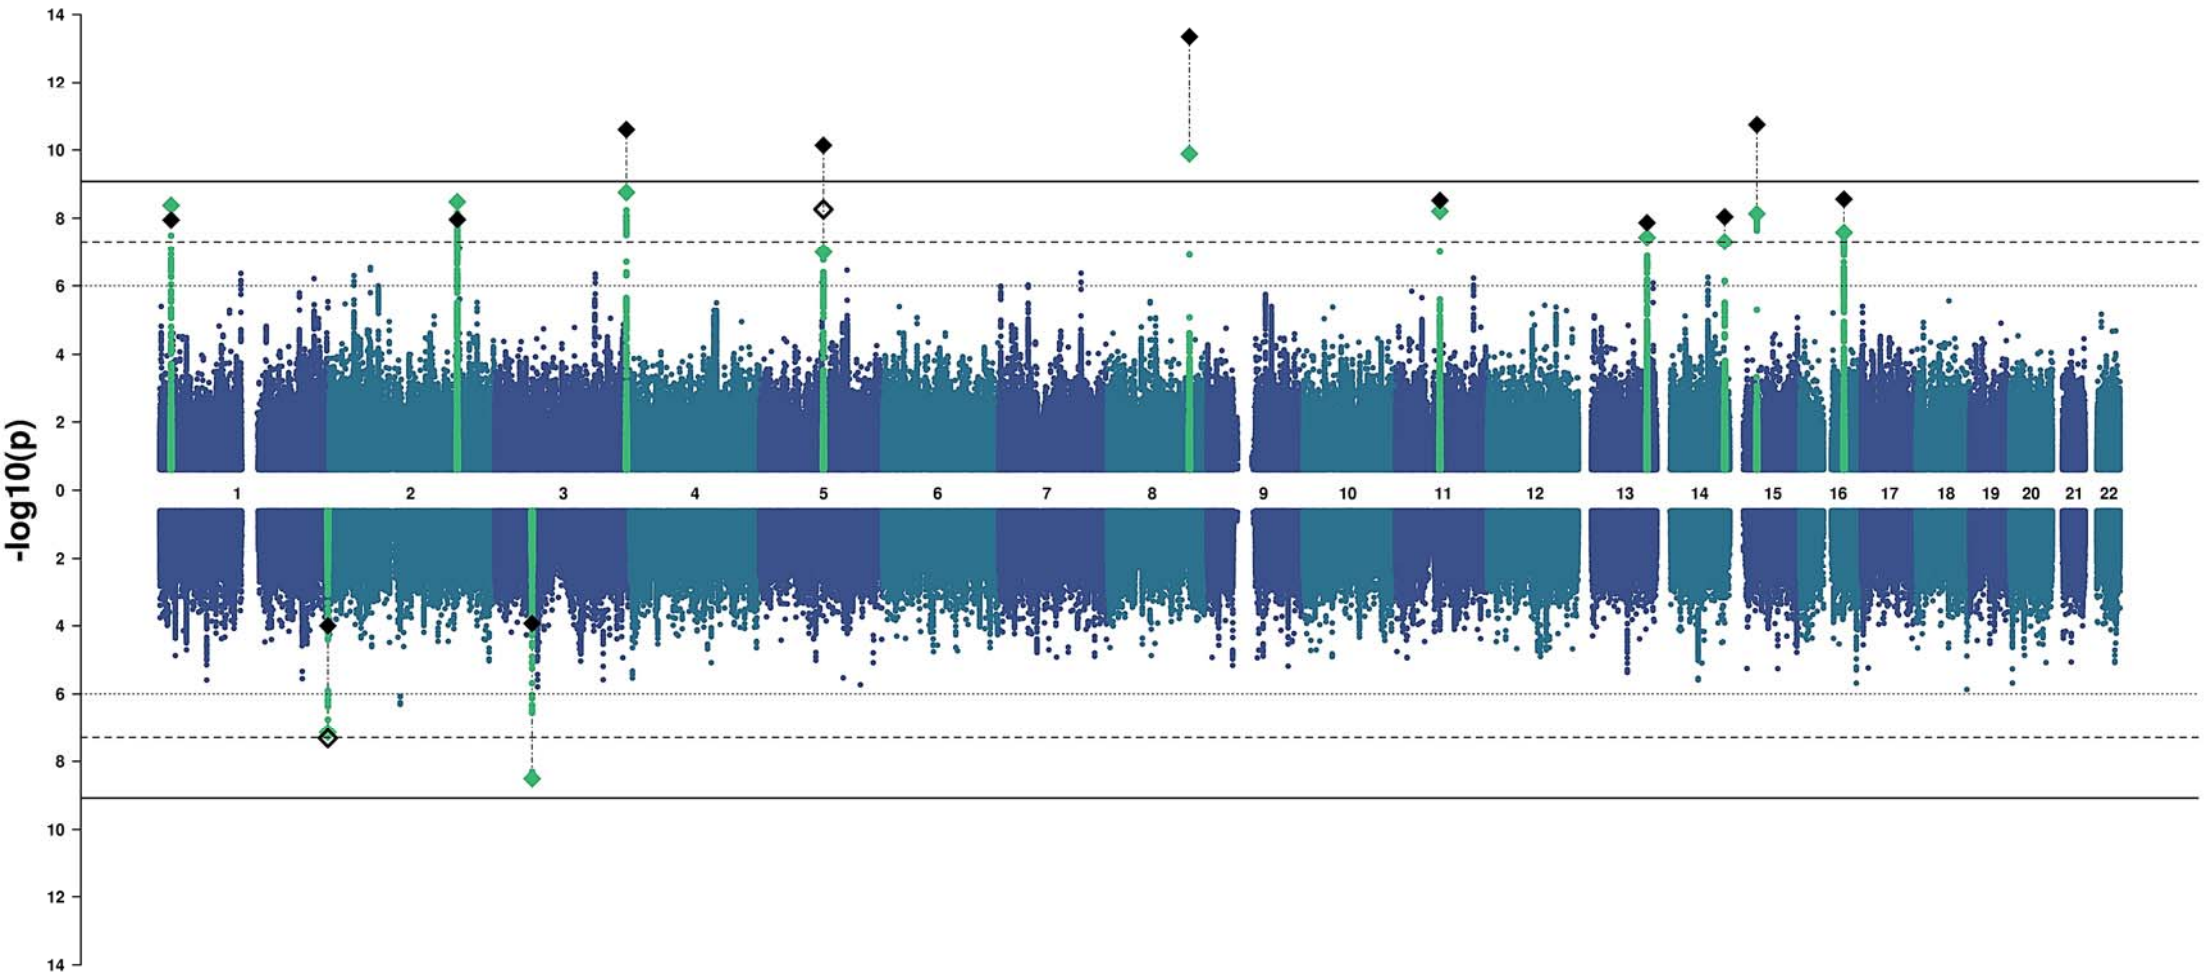

# Pars Orbitalis

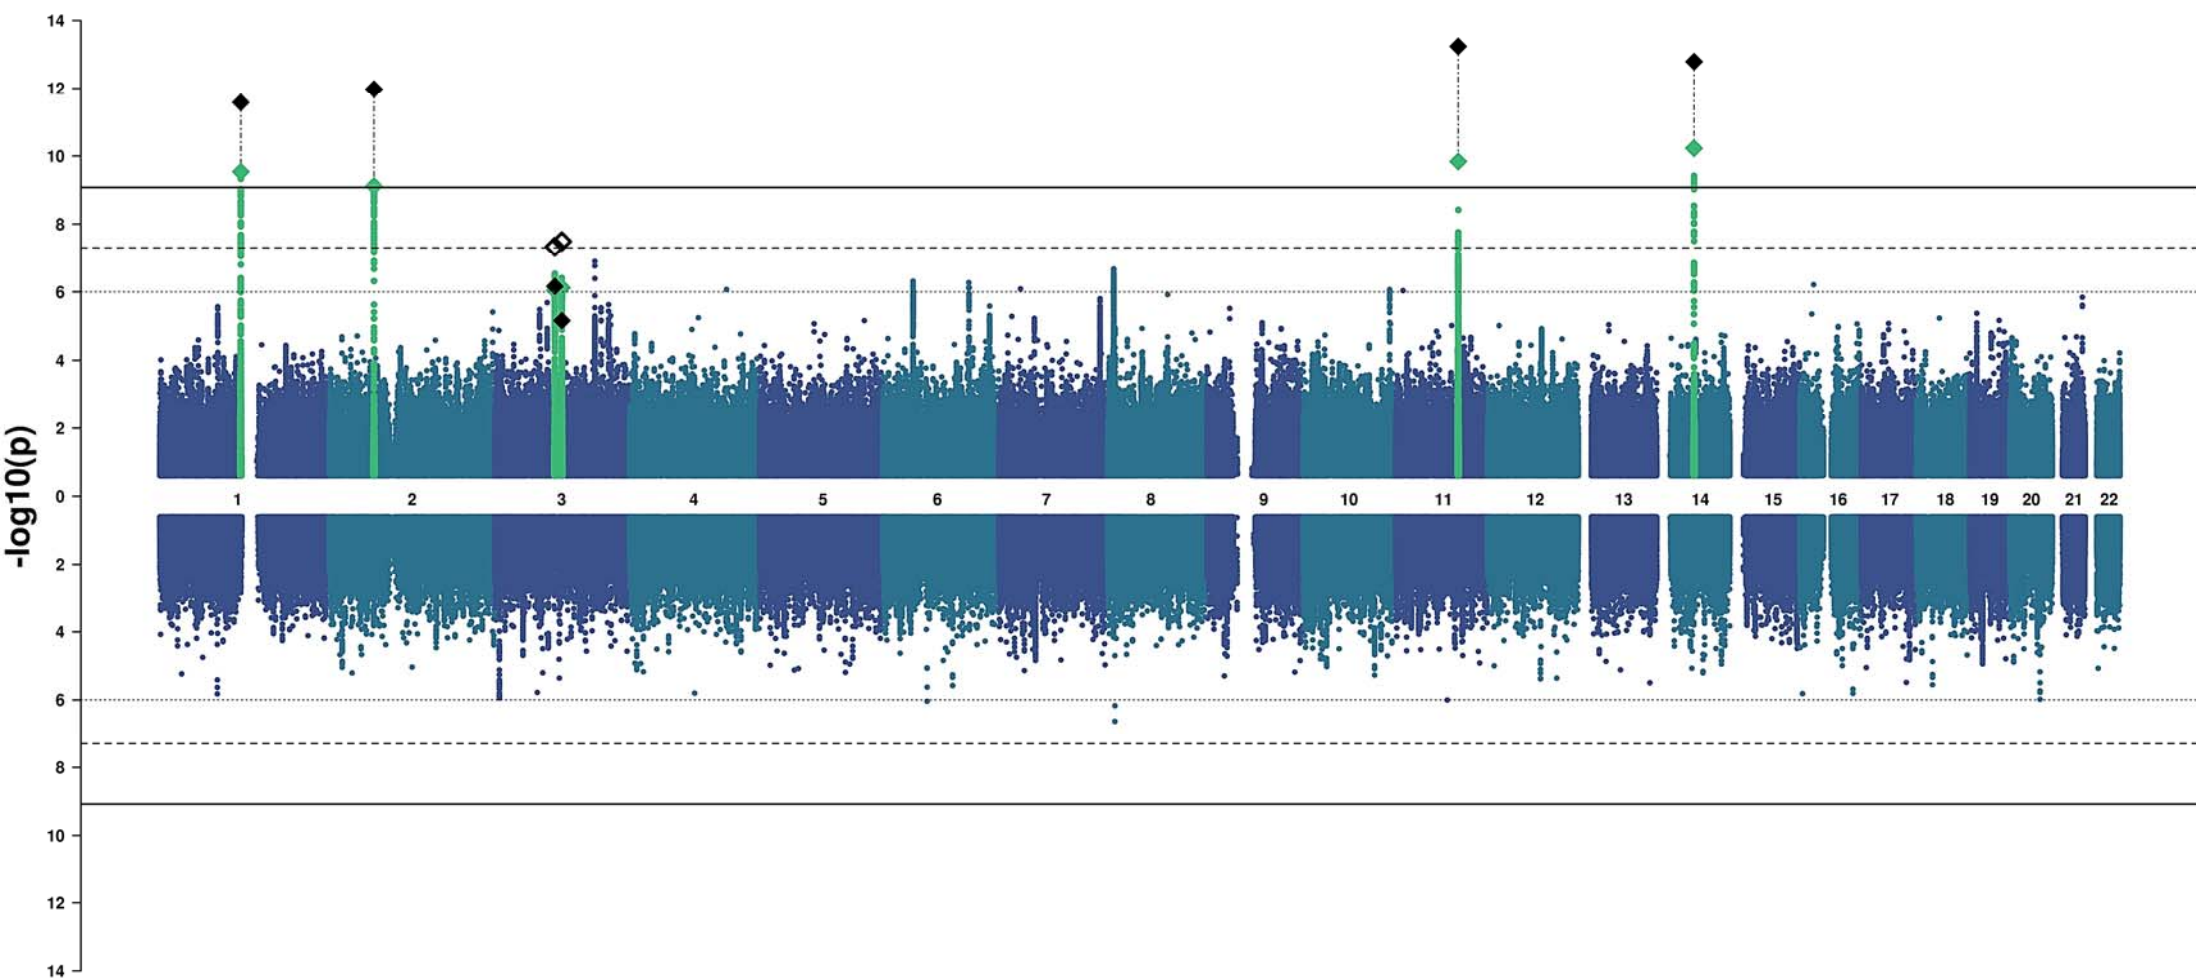

# Pars Triangularis

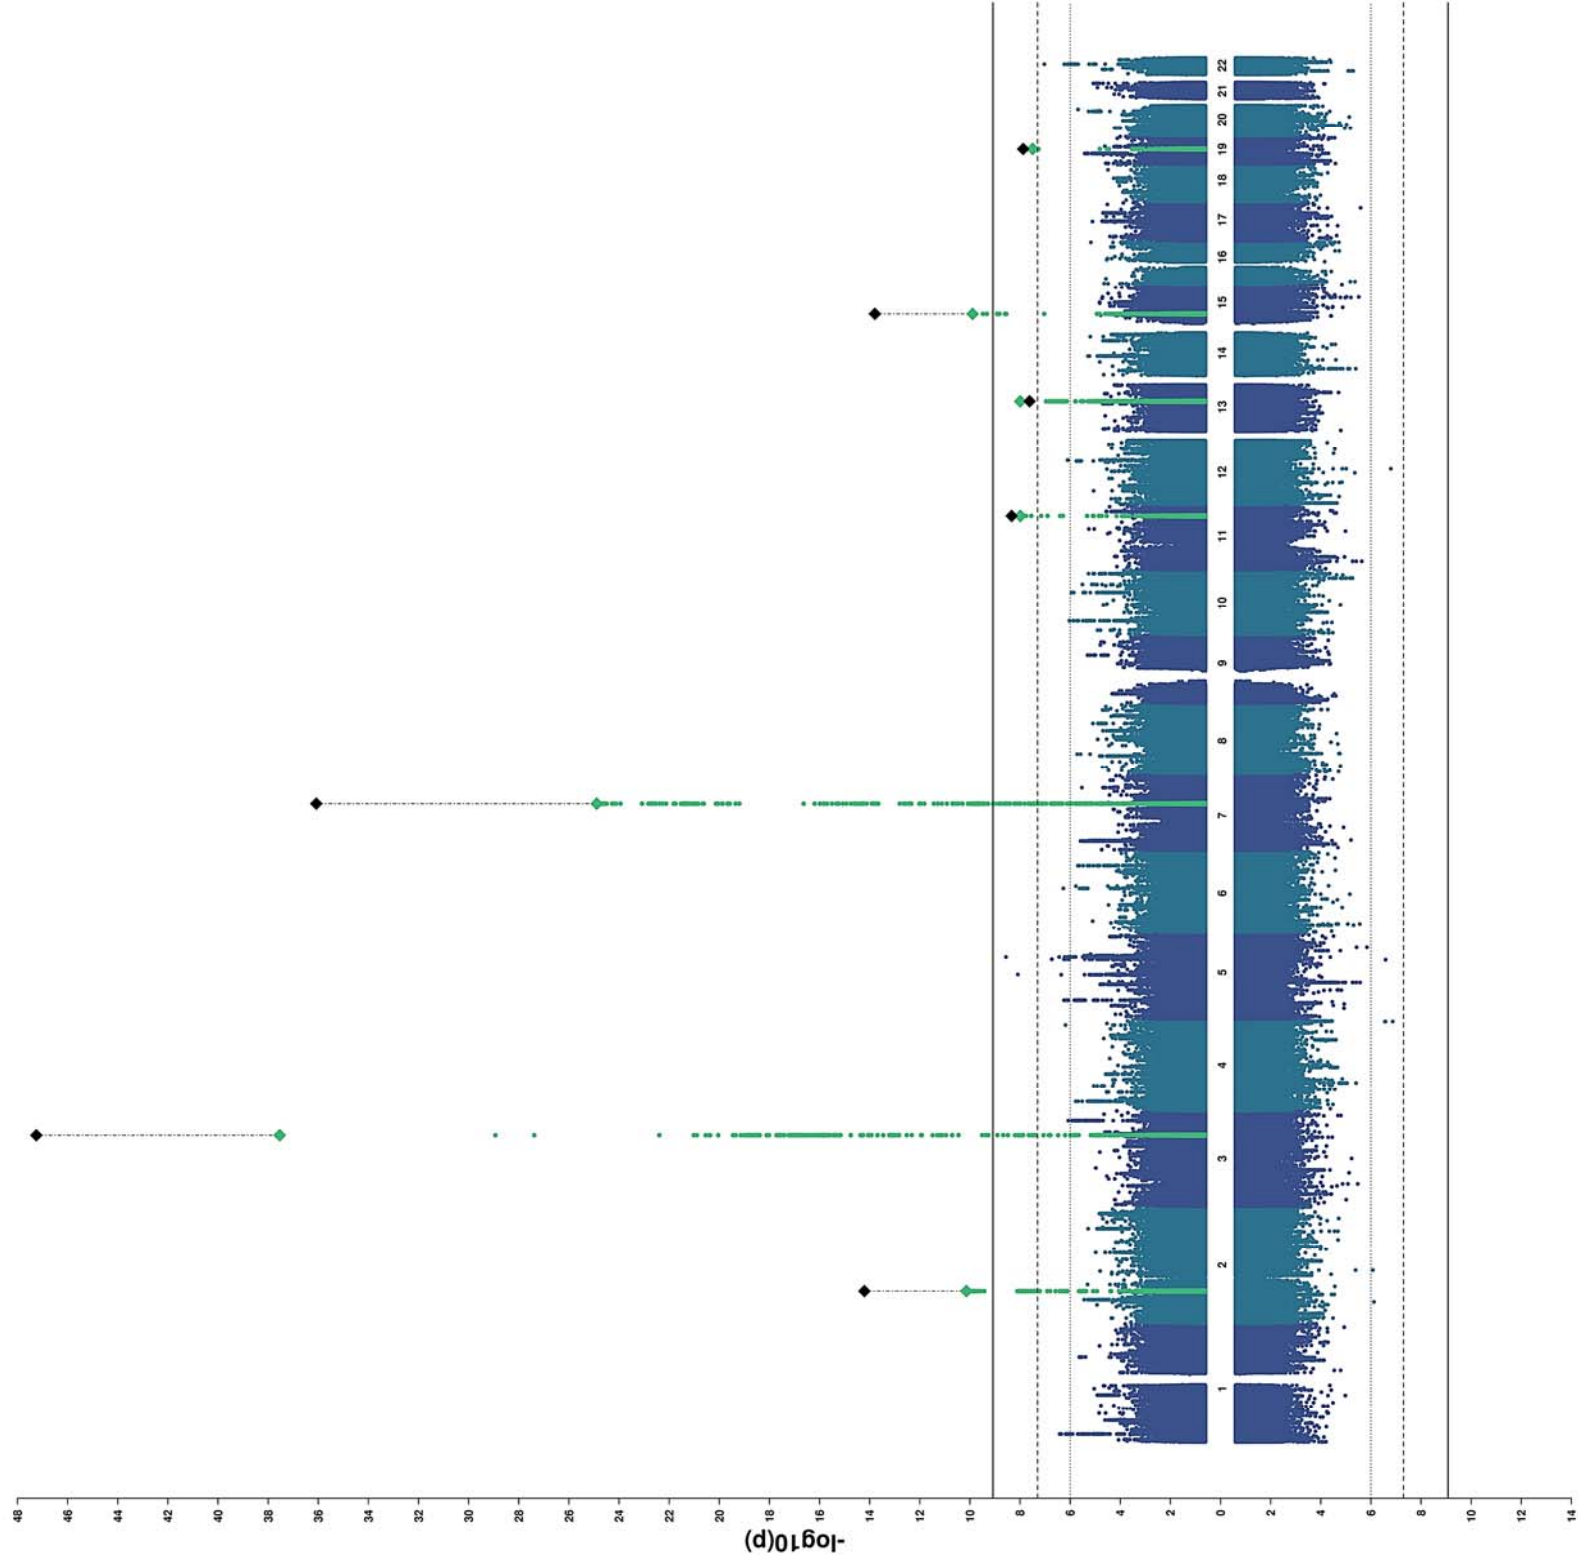

# Pars Opercularis

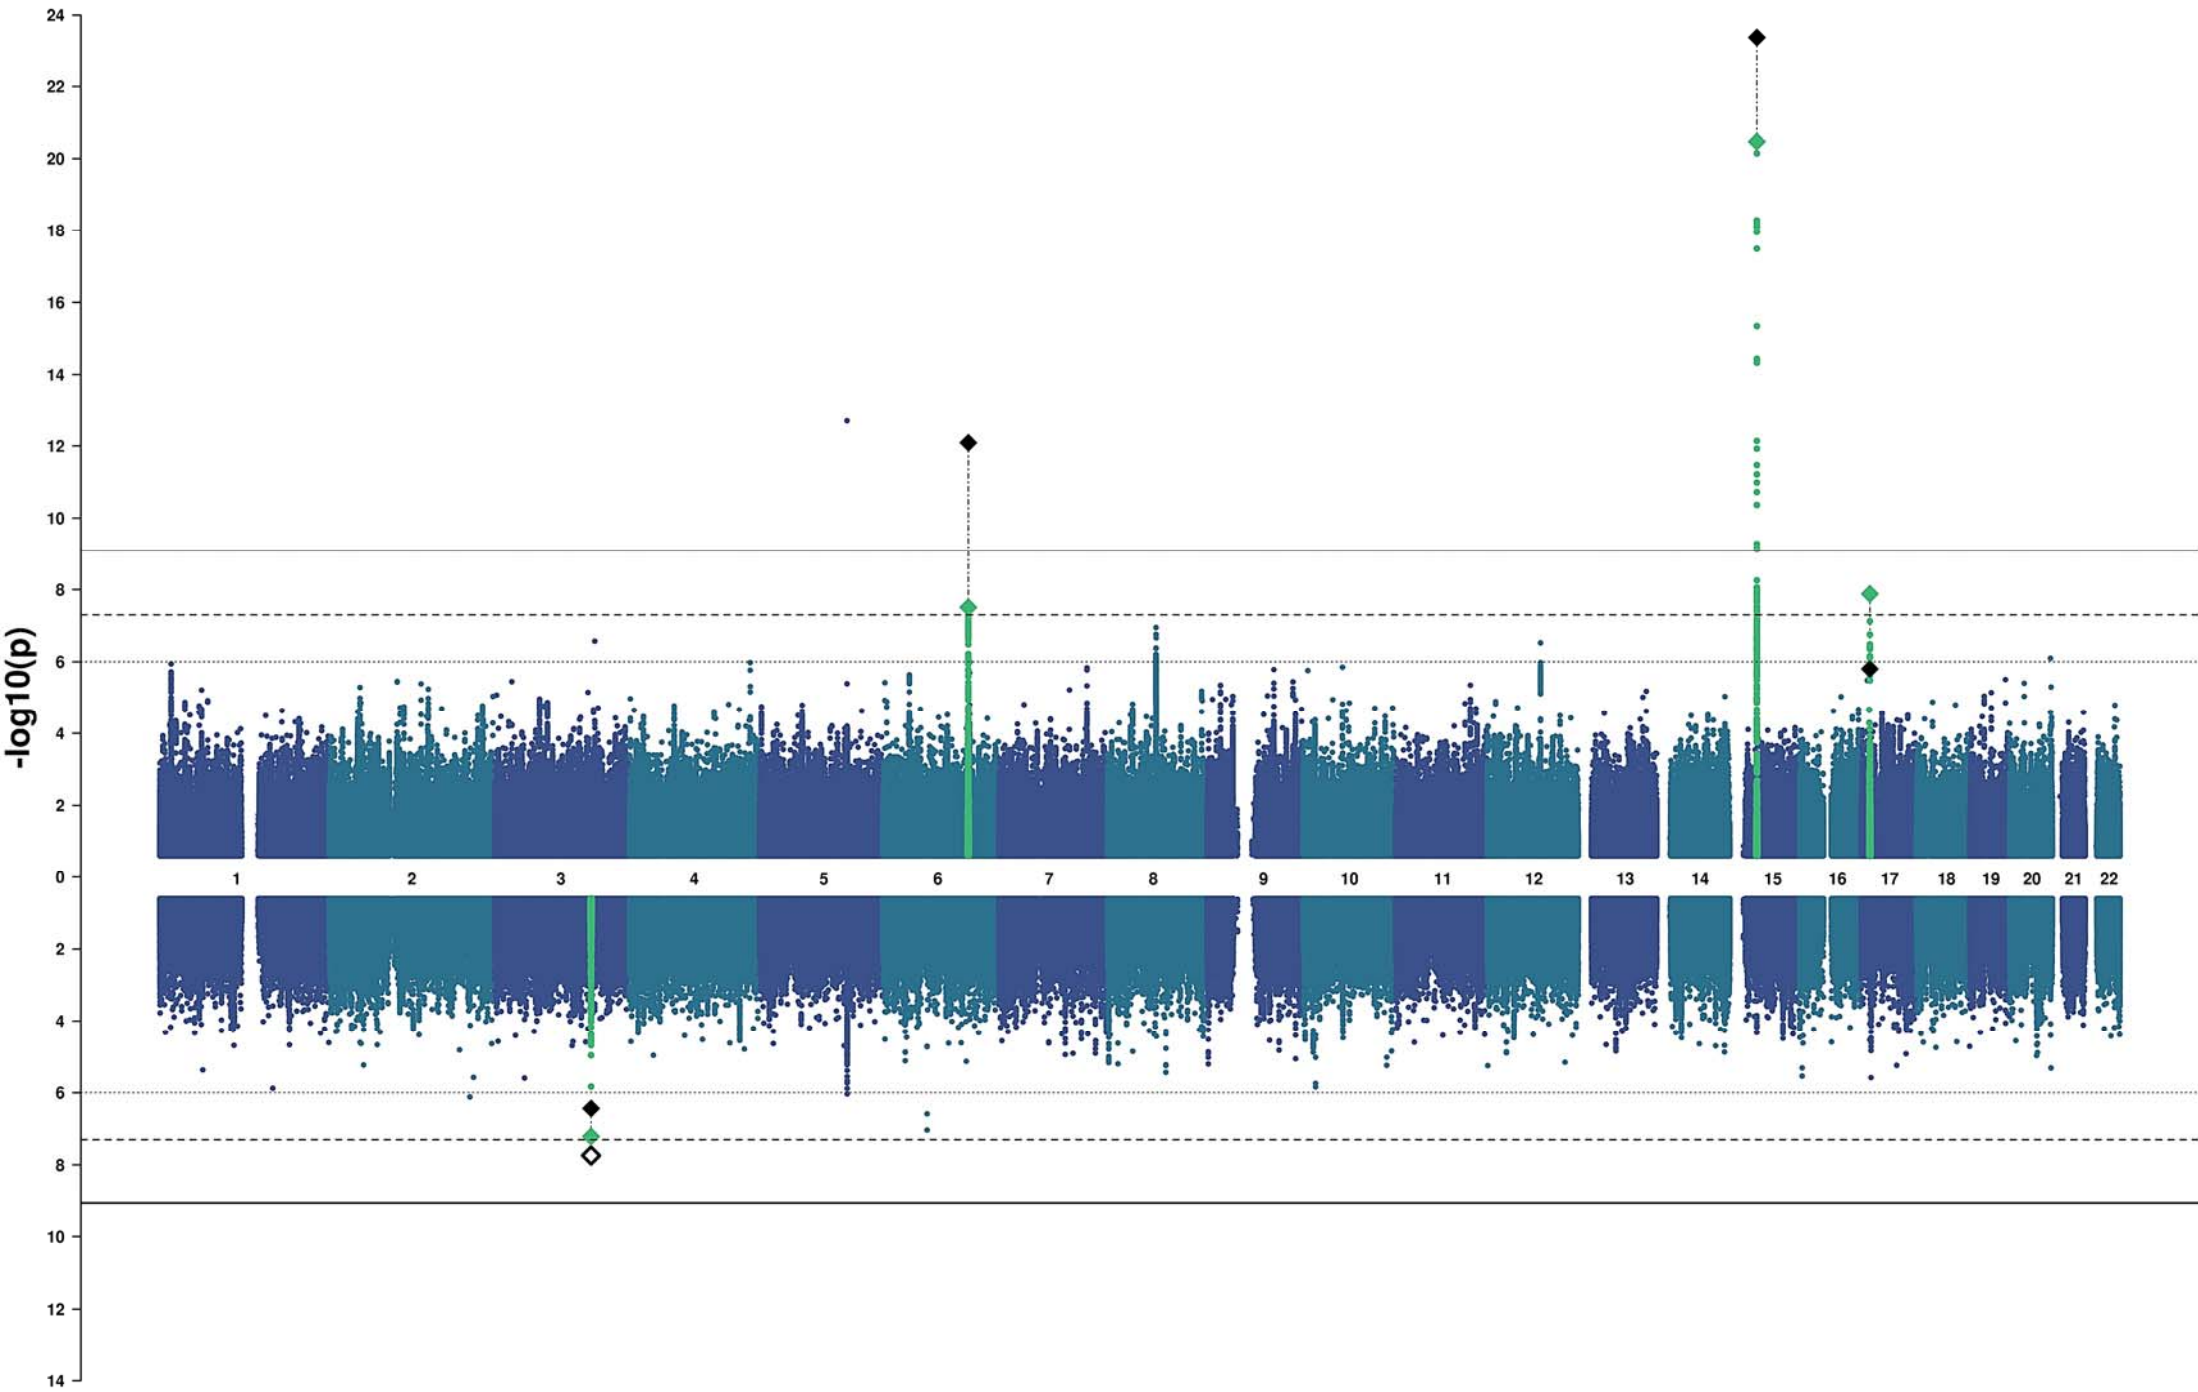



# Caudal Middle Frontal

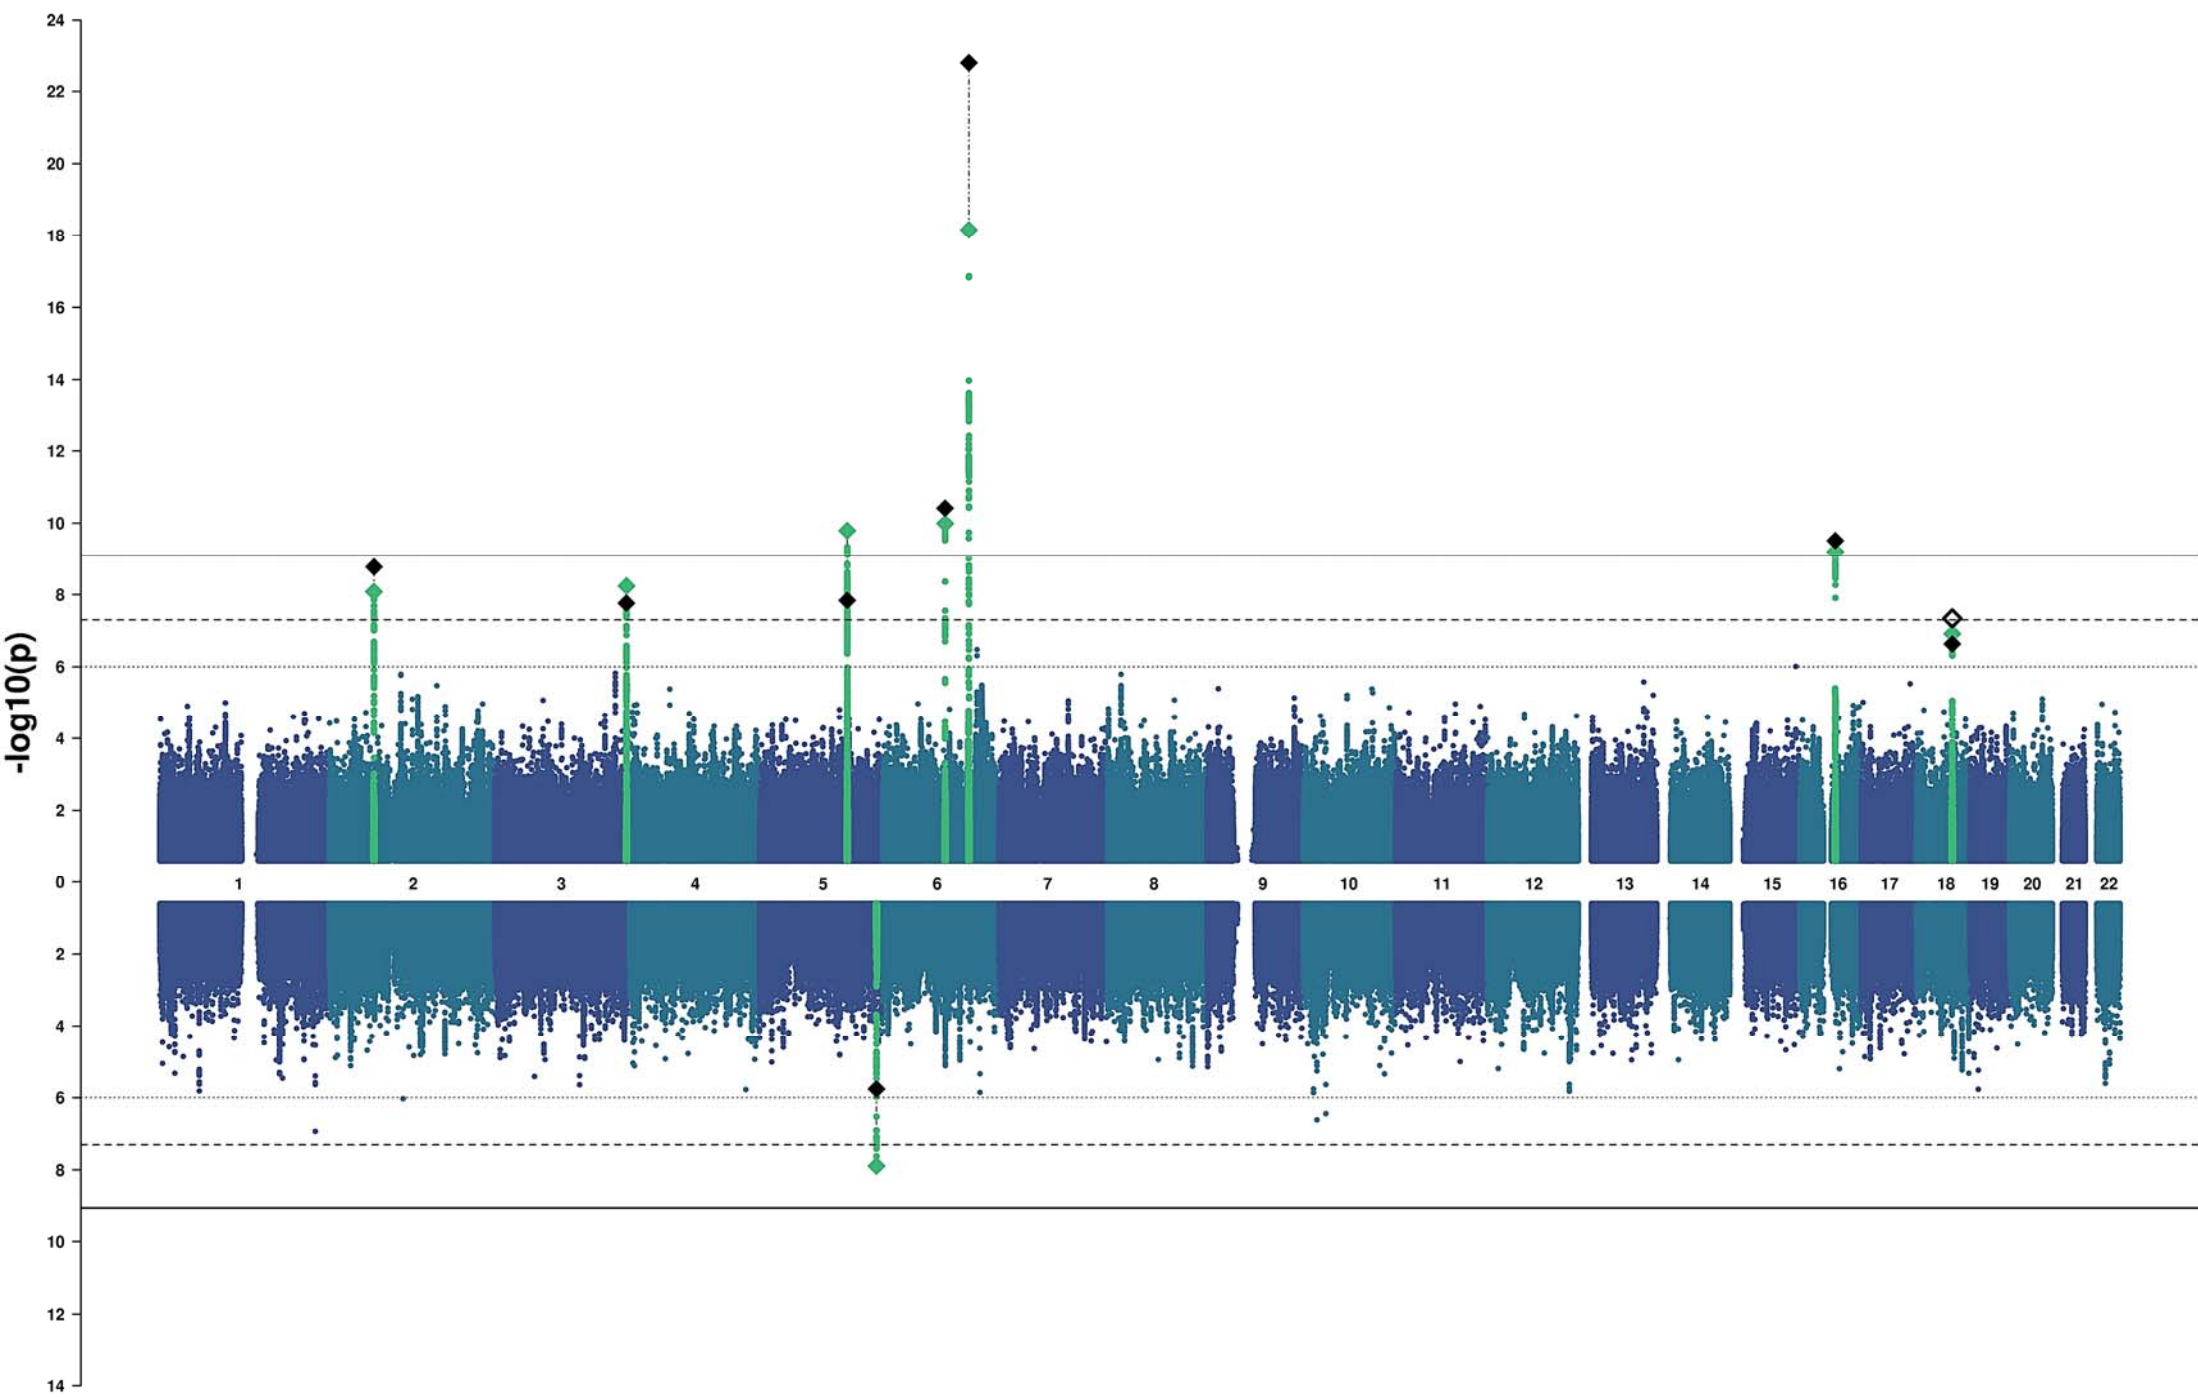



# Paracentral

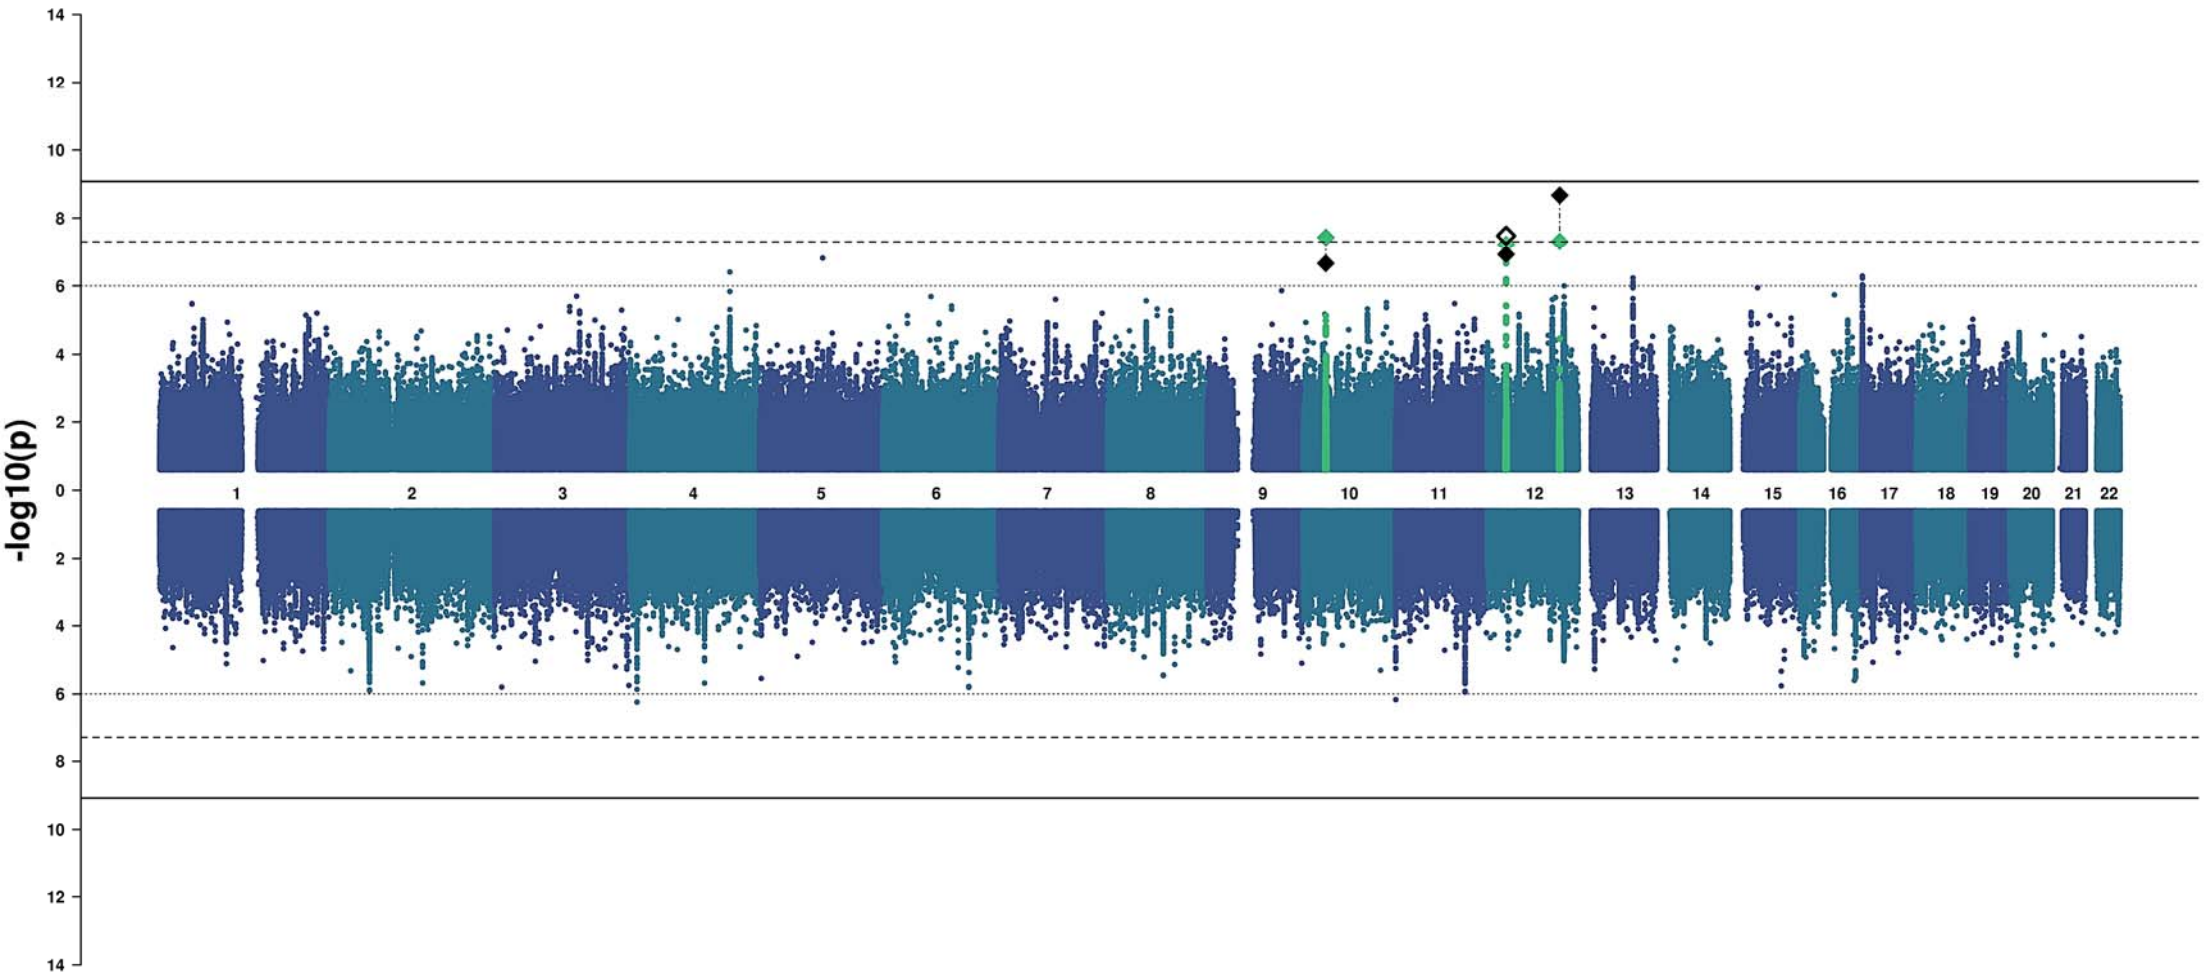

Precentral

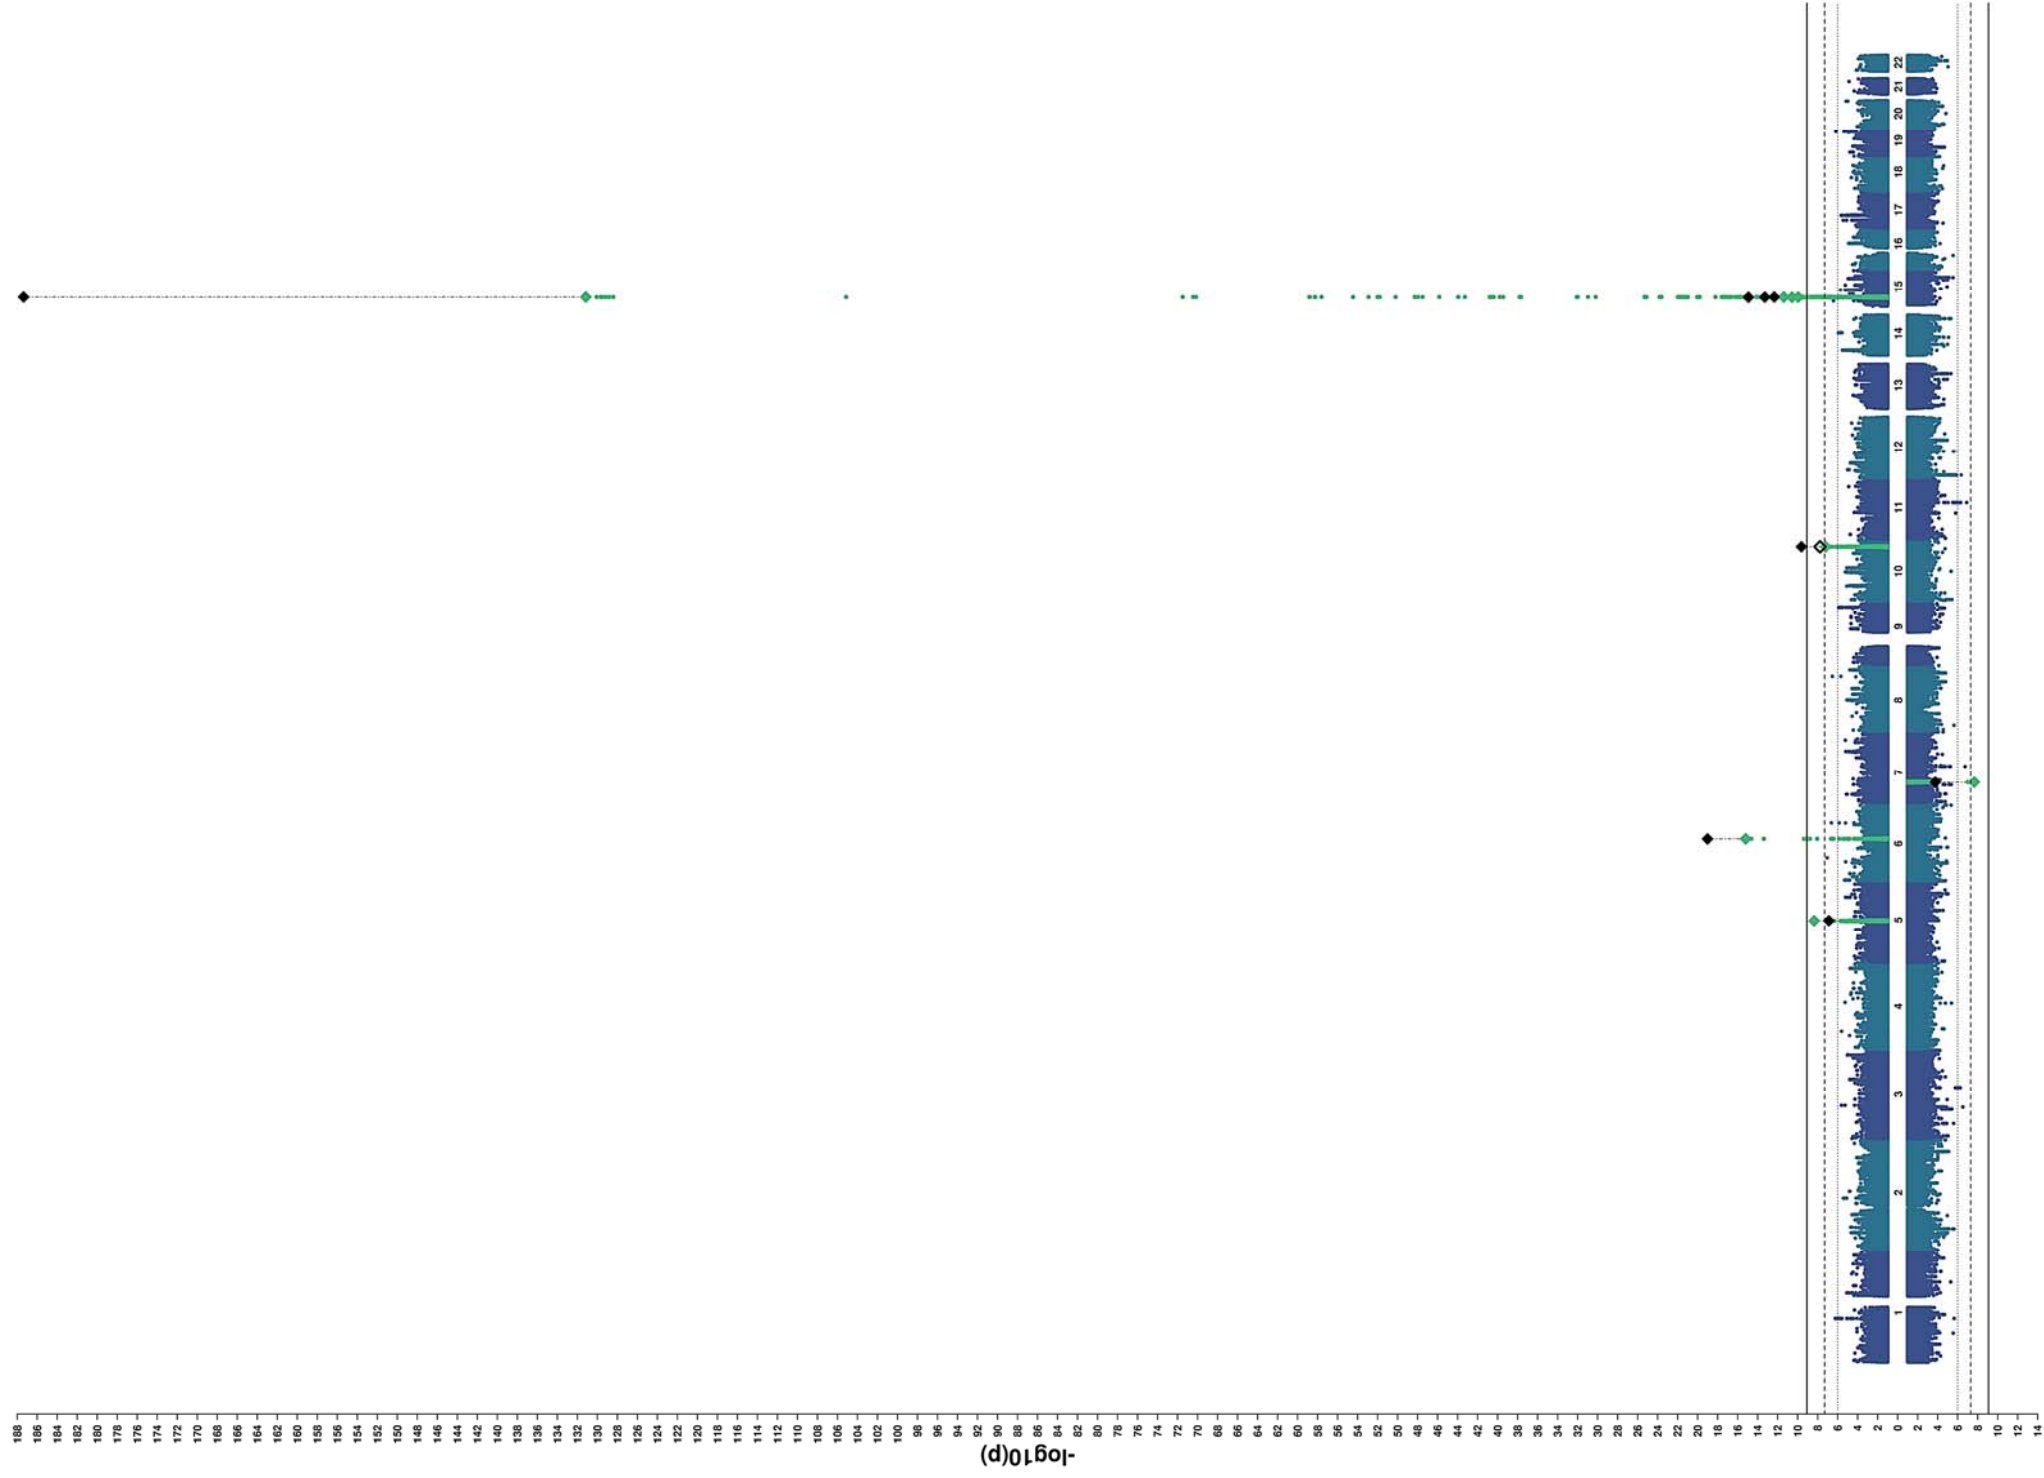

# Postcentral

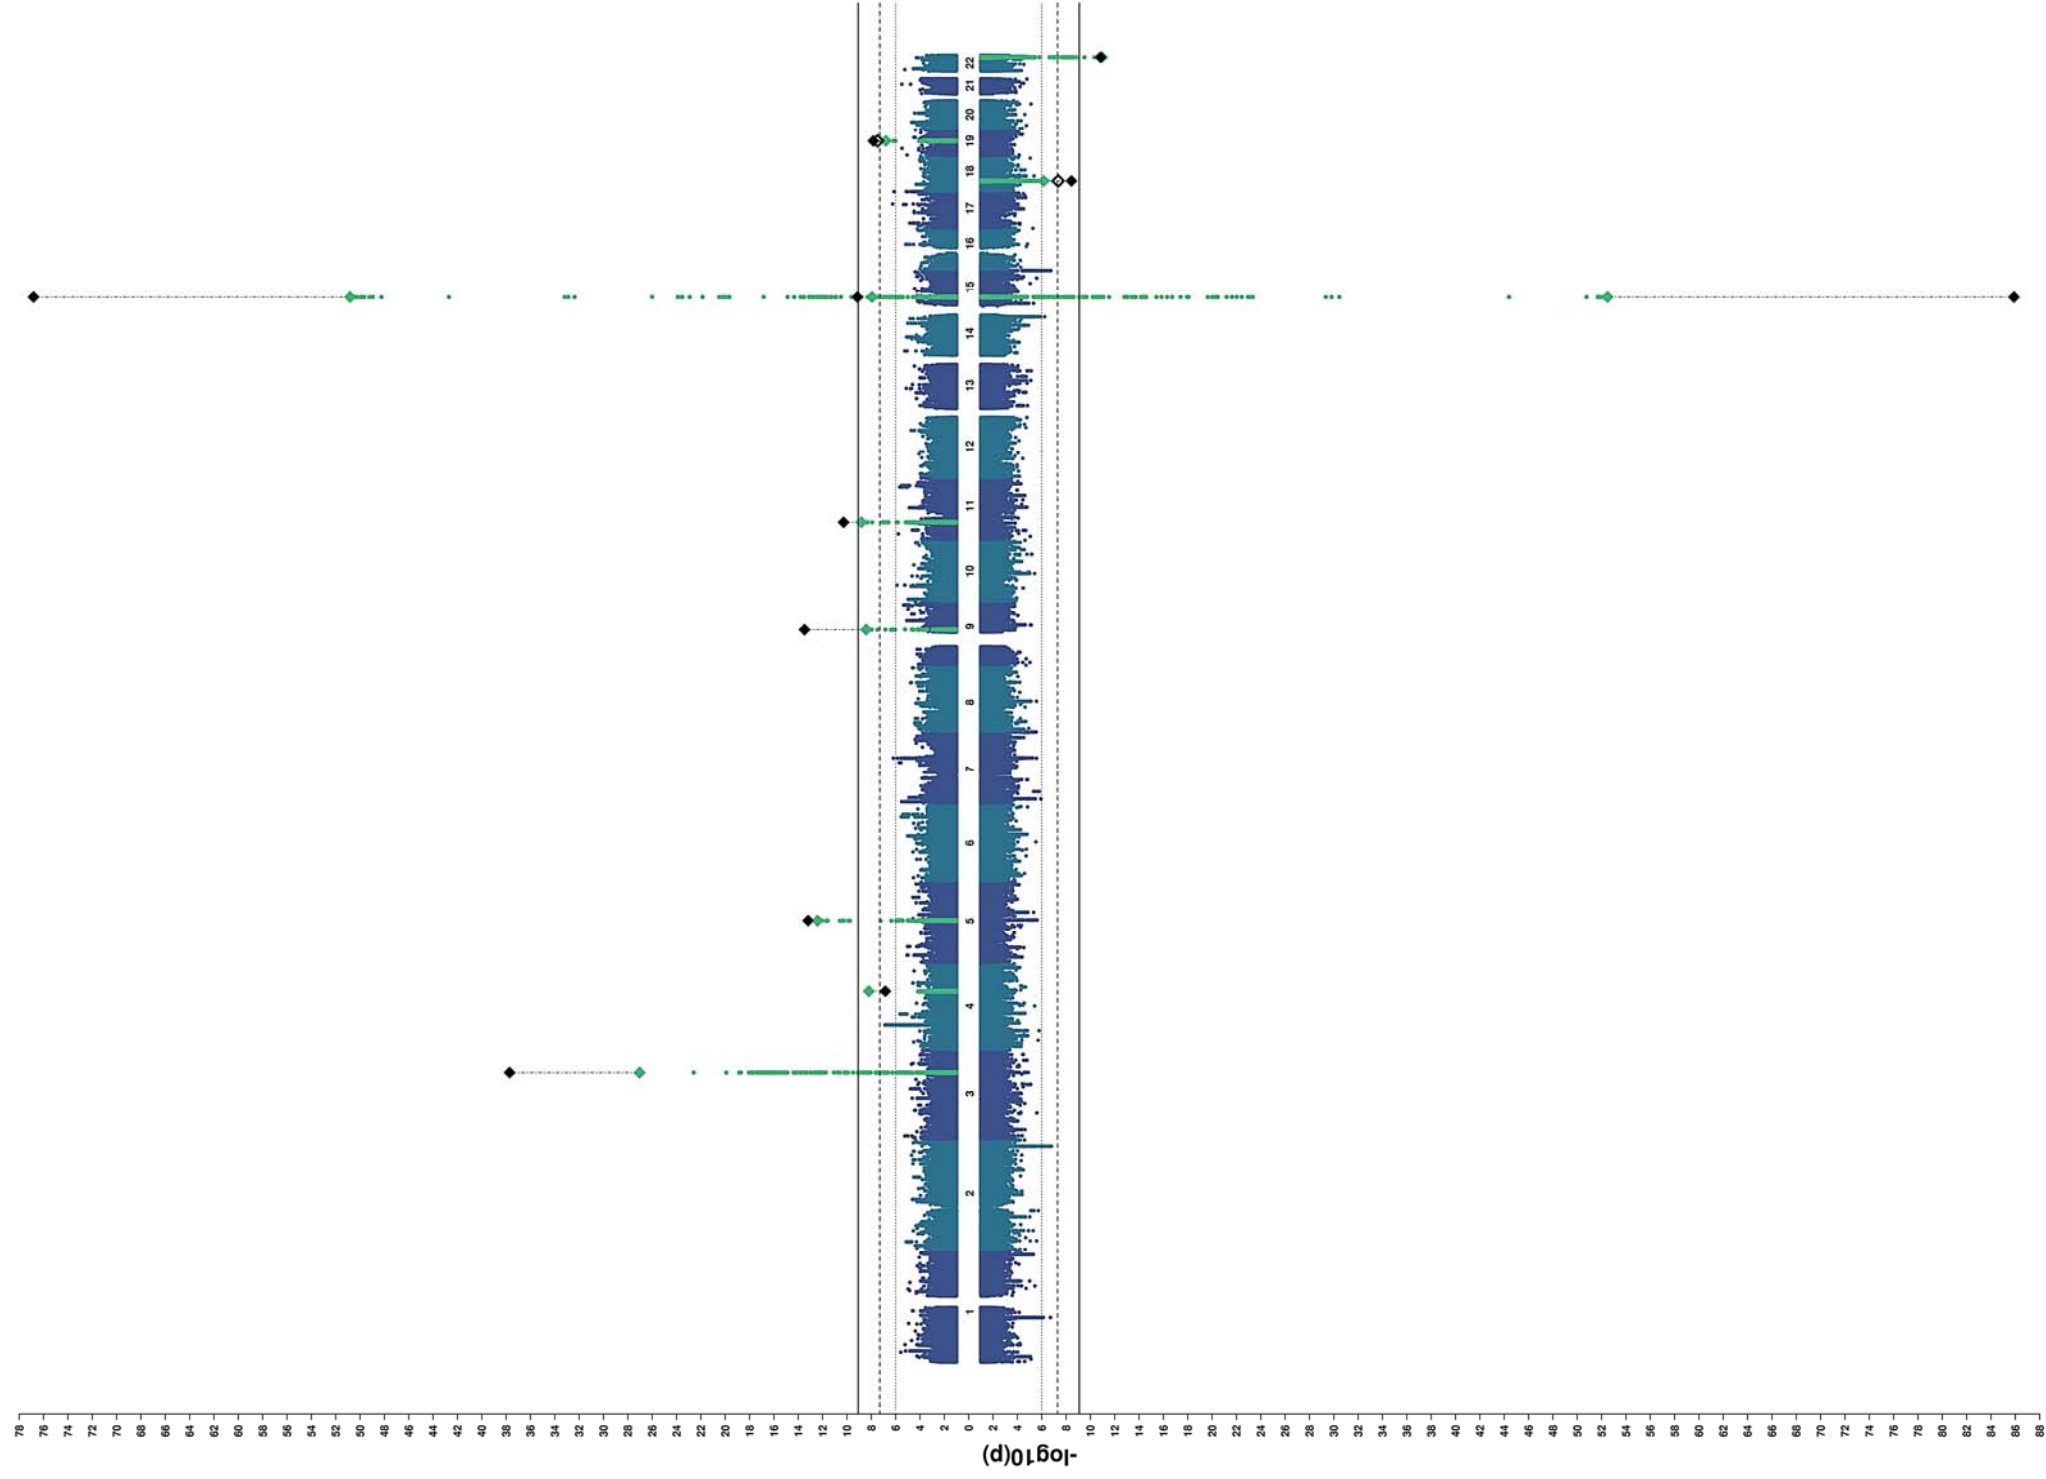

# Precuneus

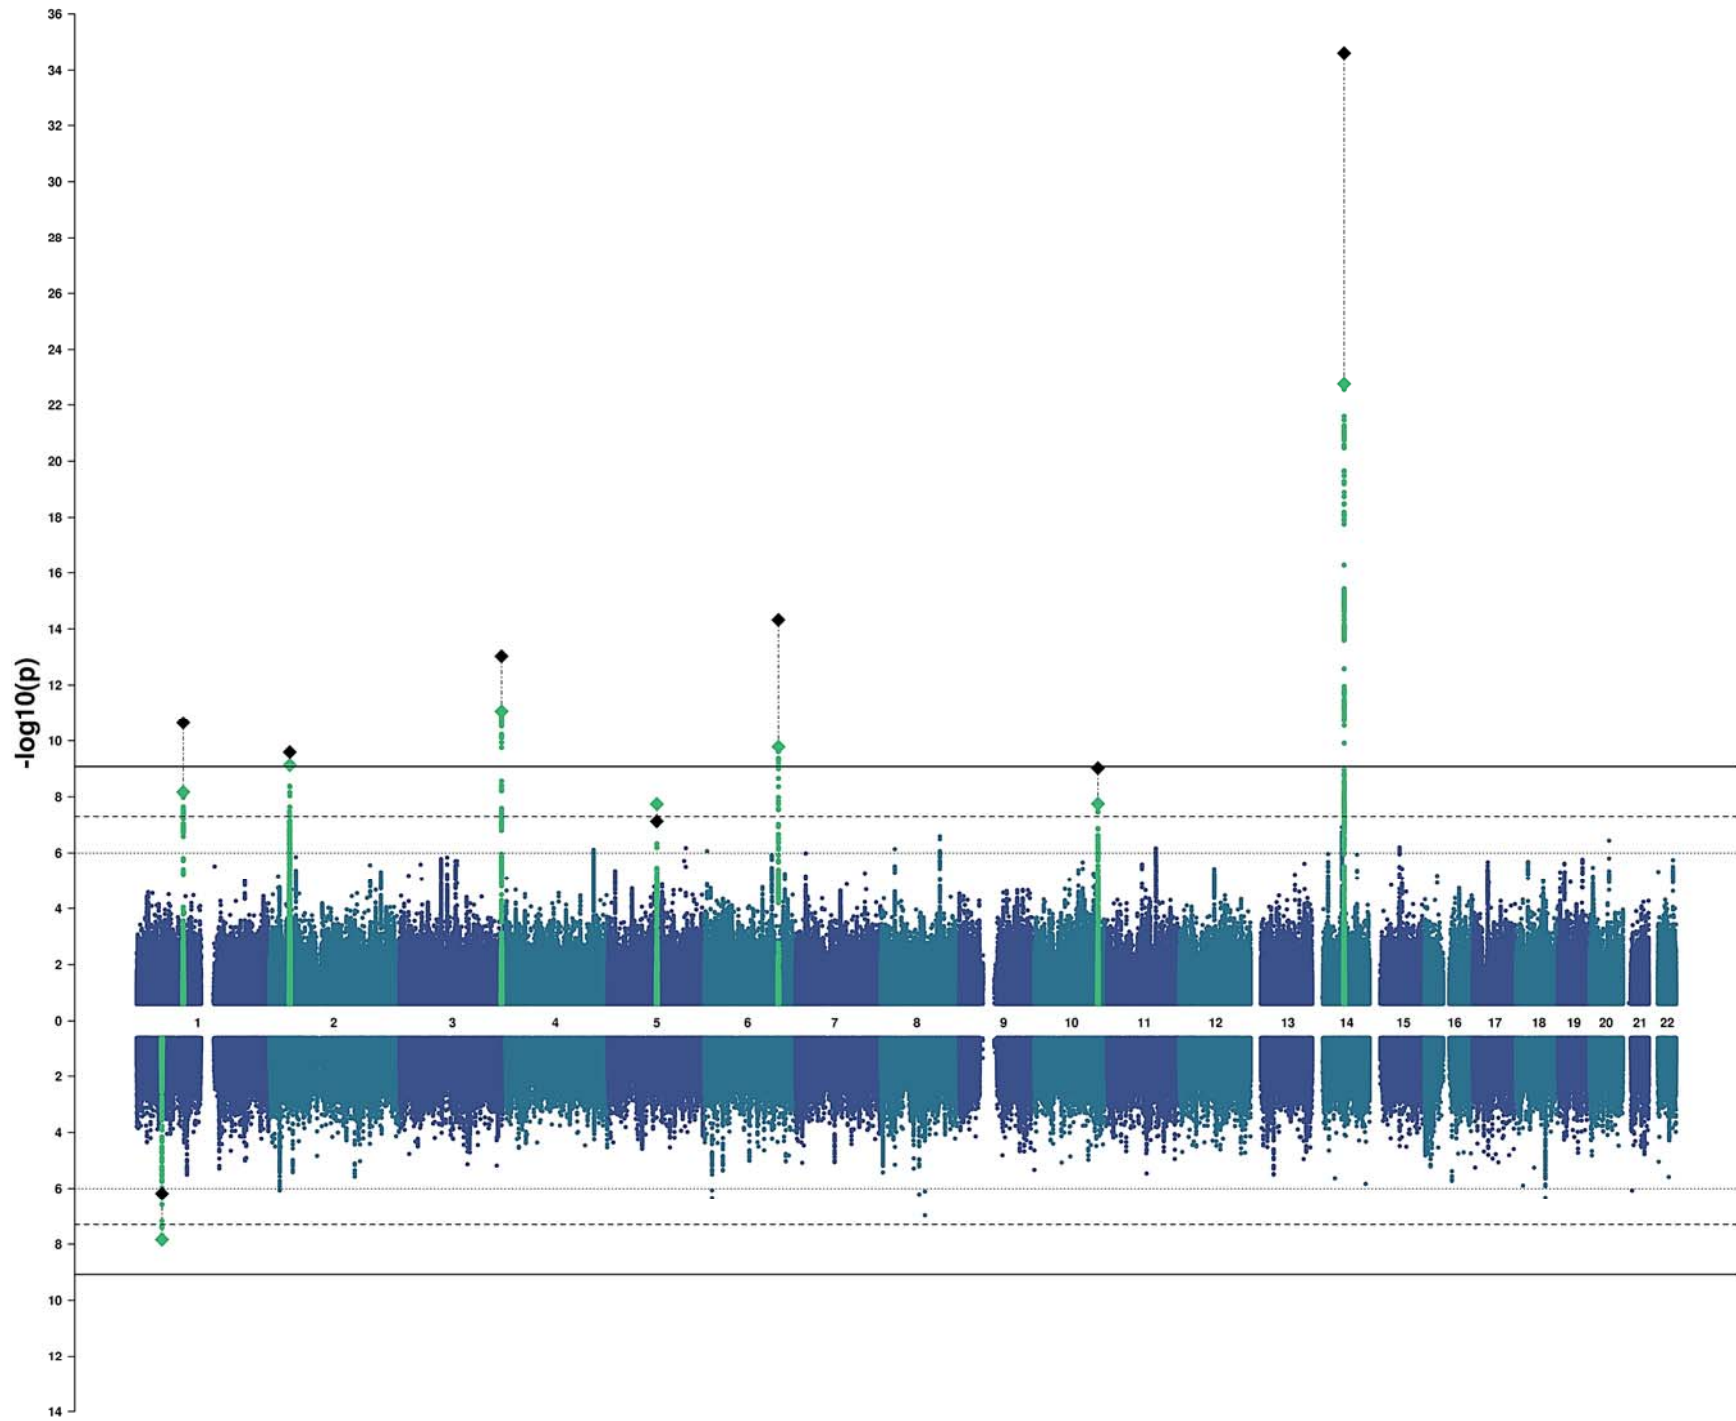

# Superior Parietal

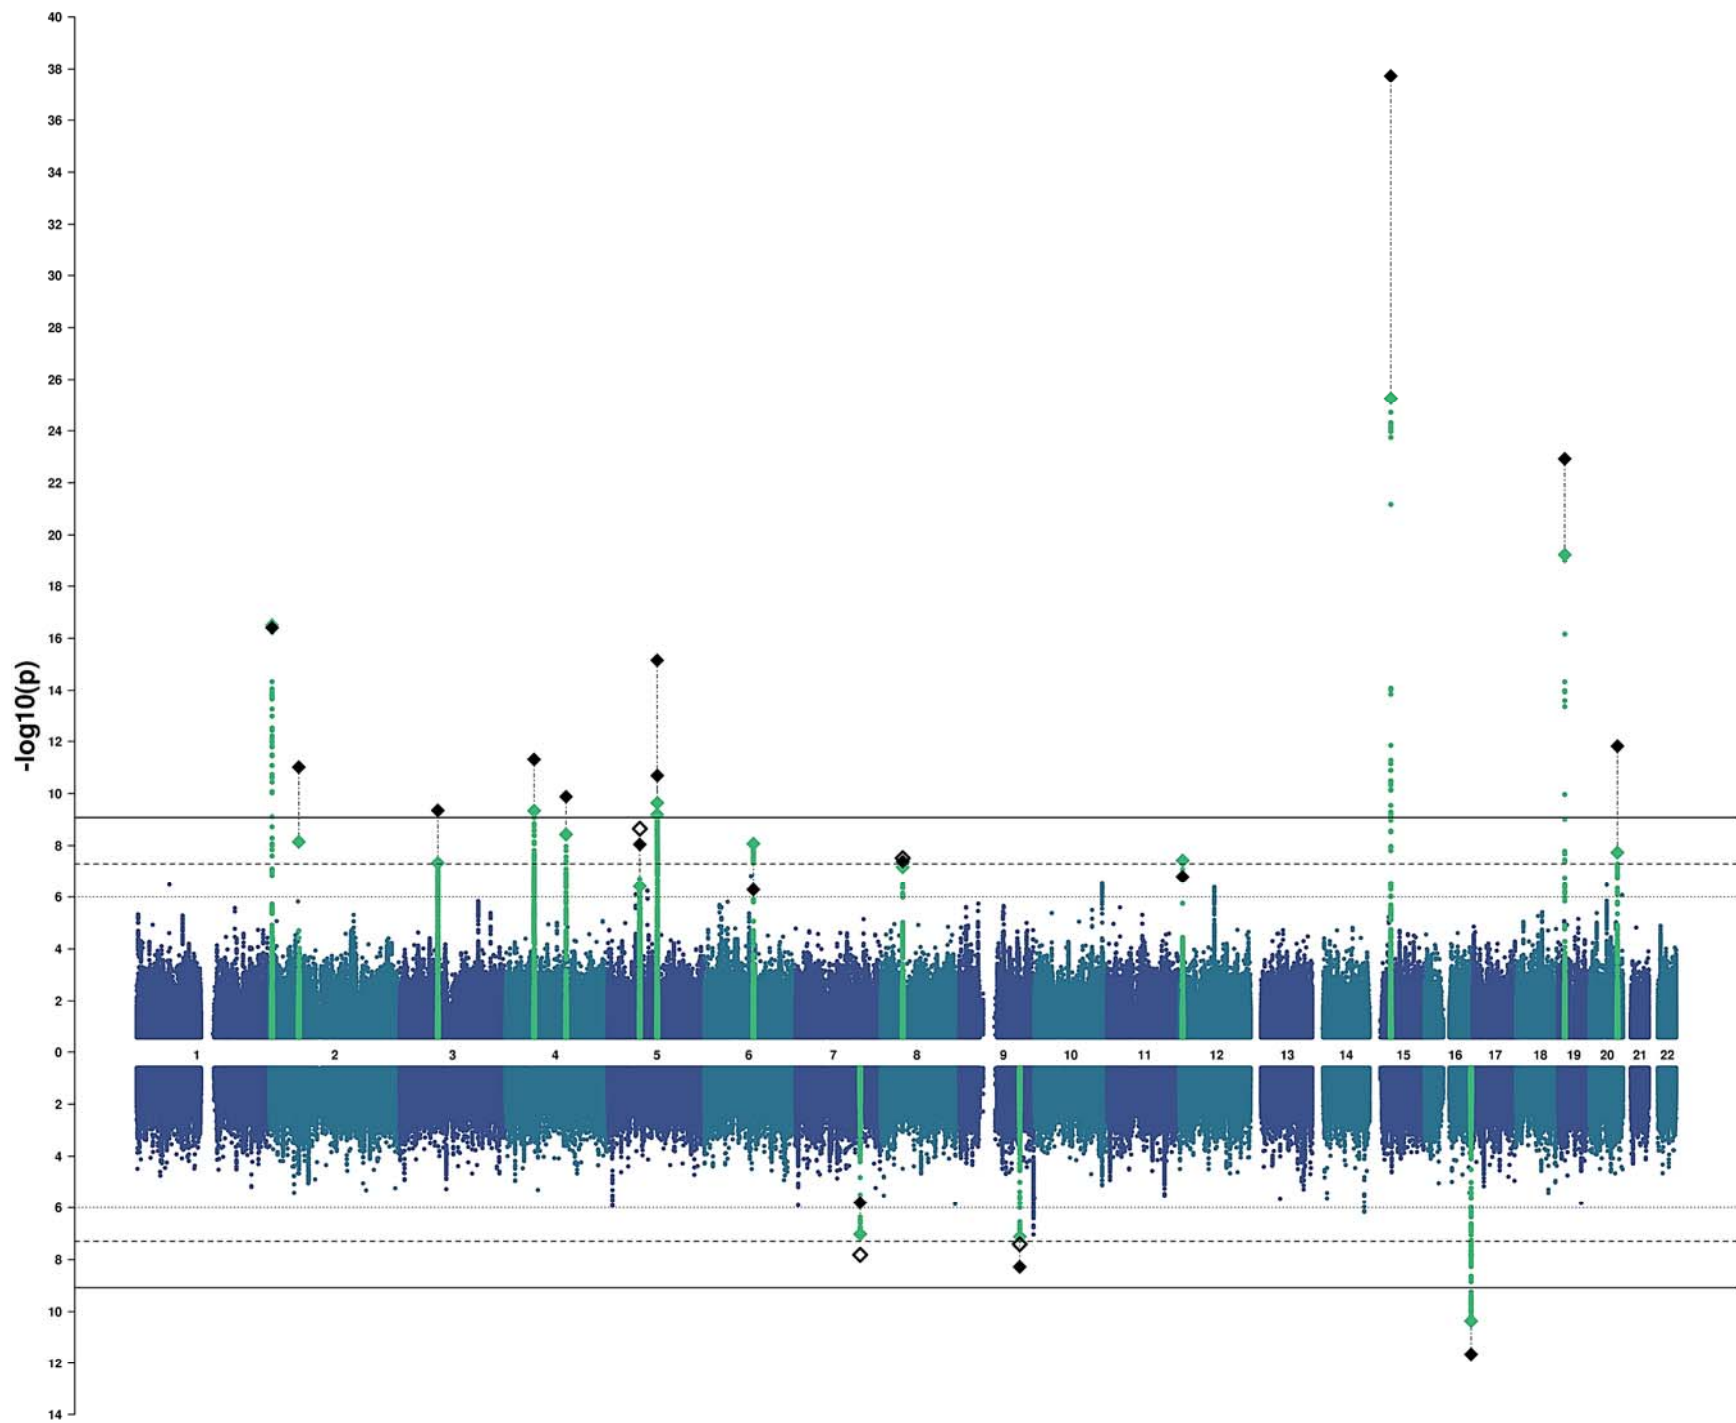



# Supramarginal

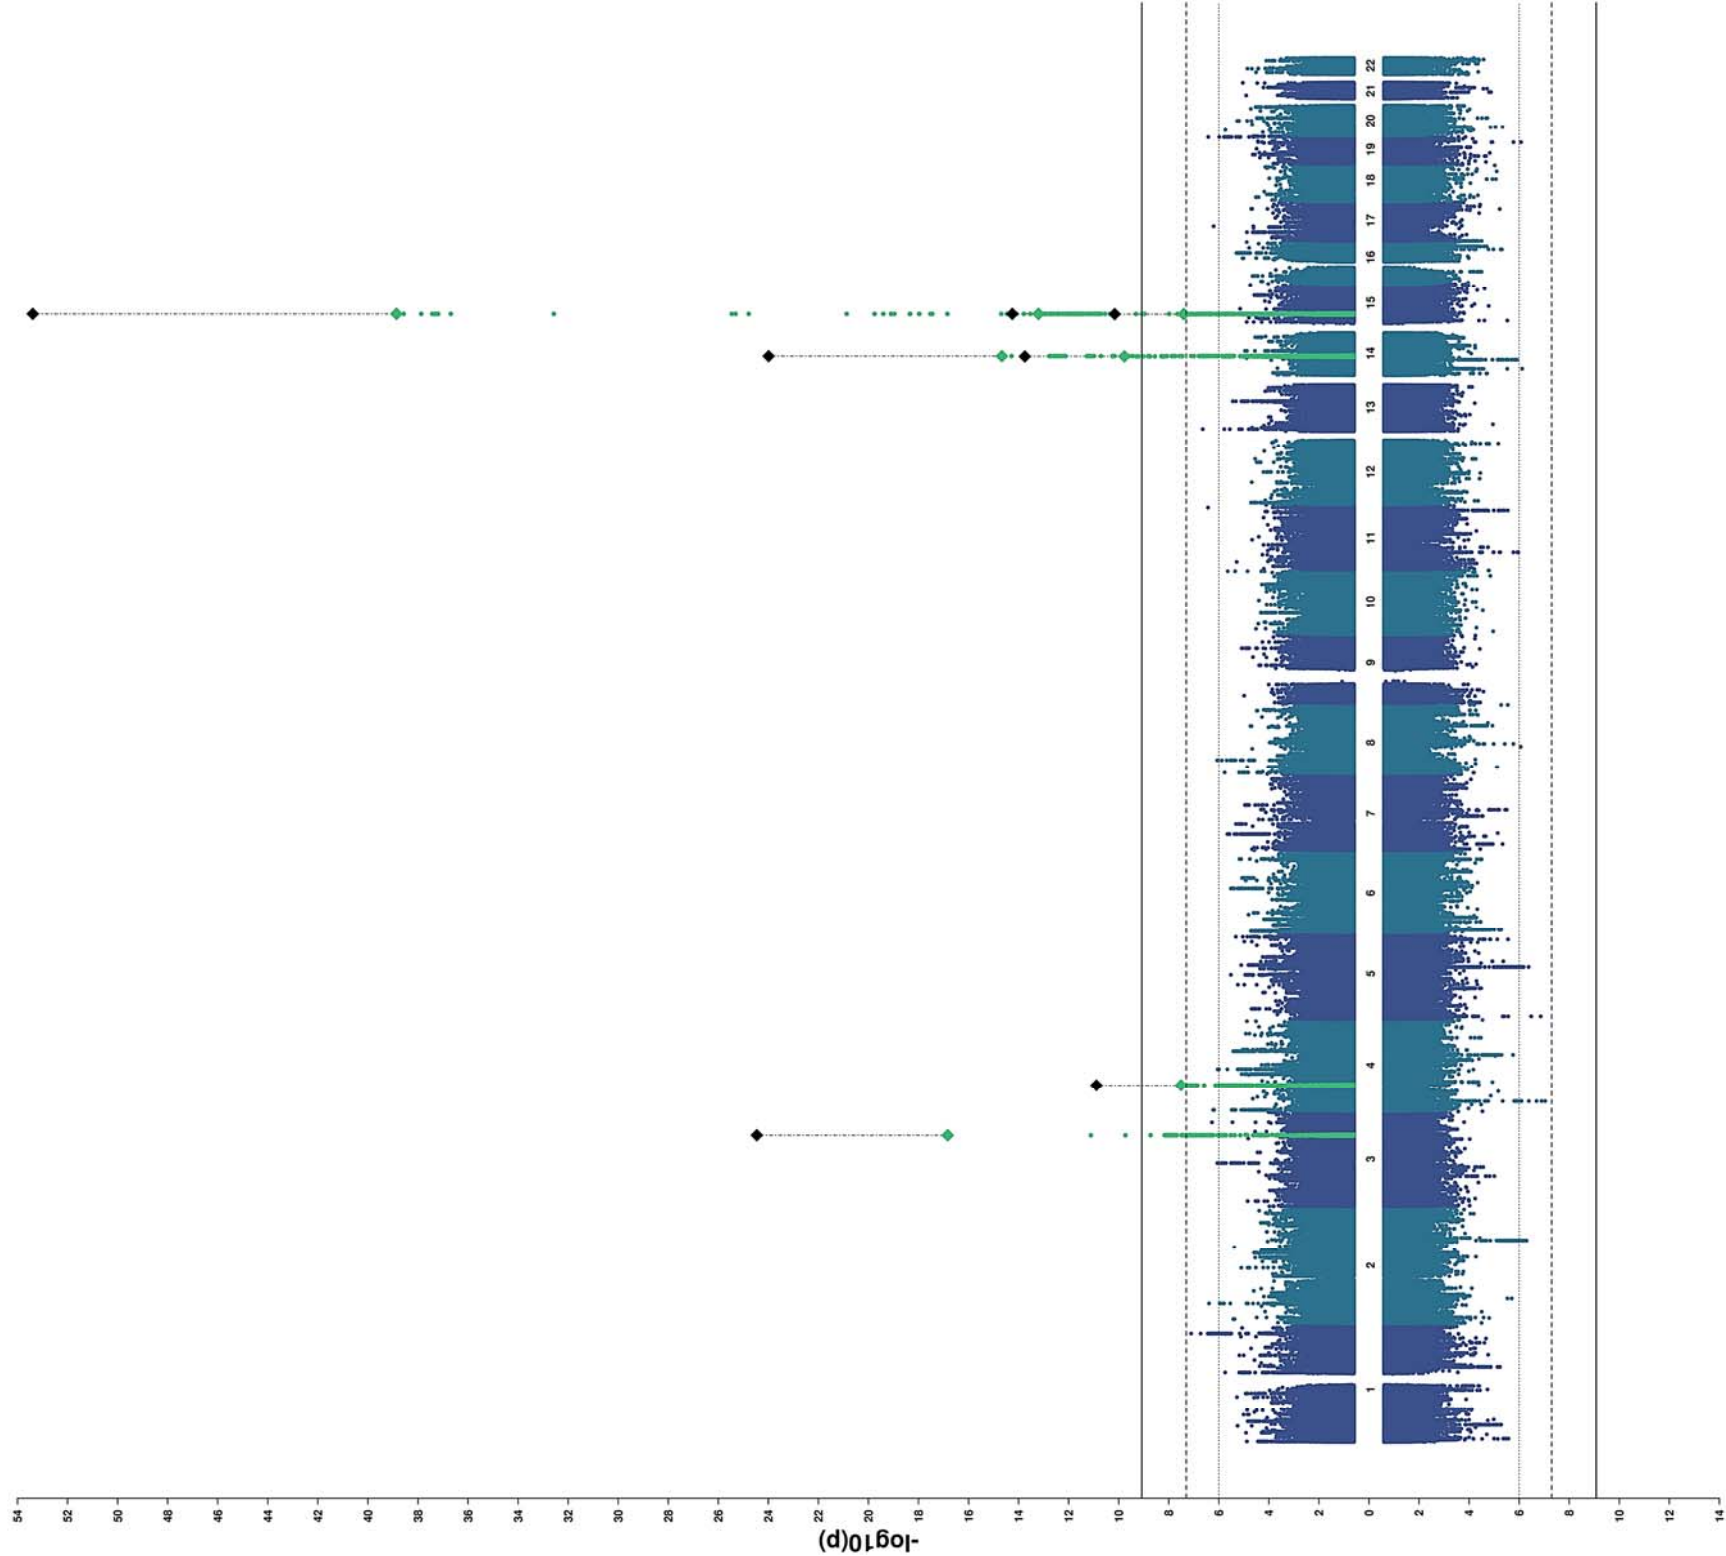

# Inferior Parietal

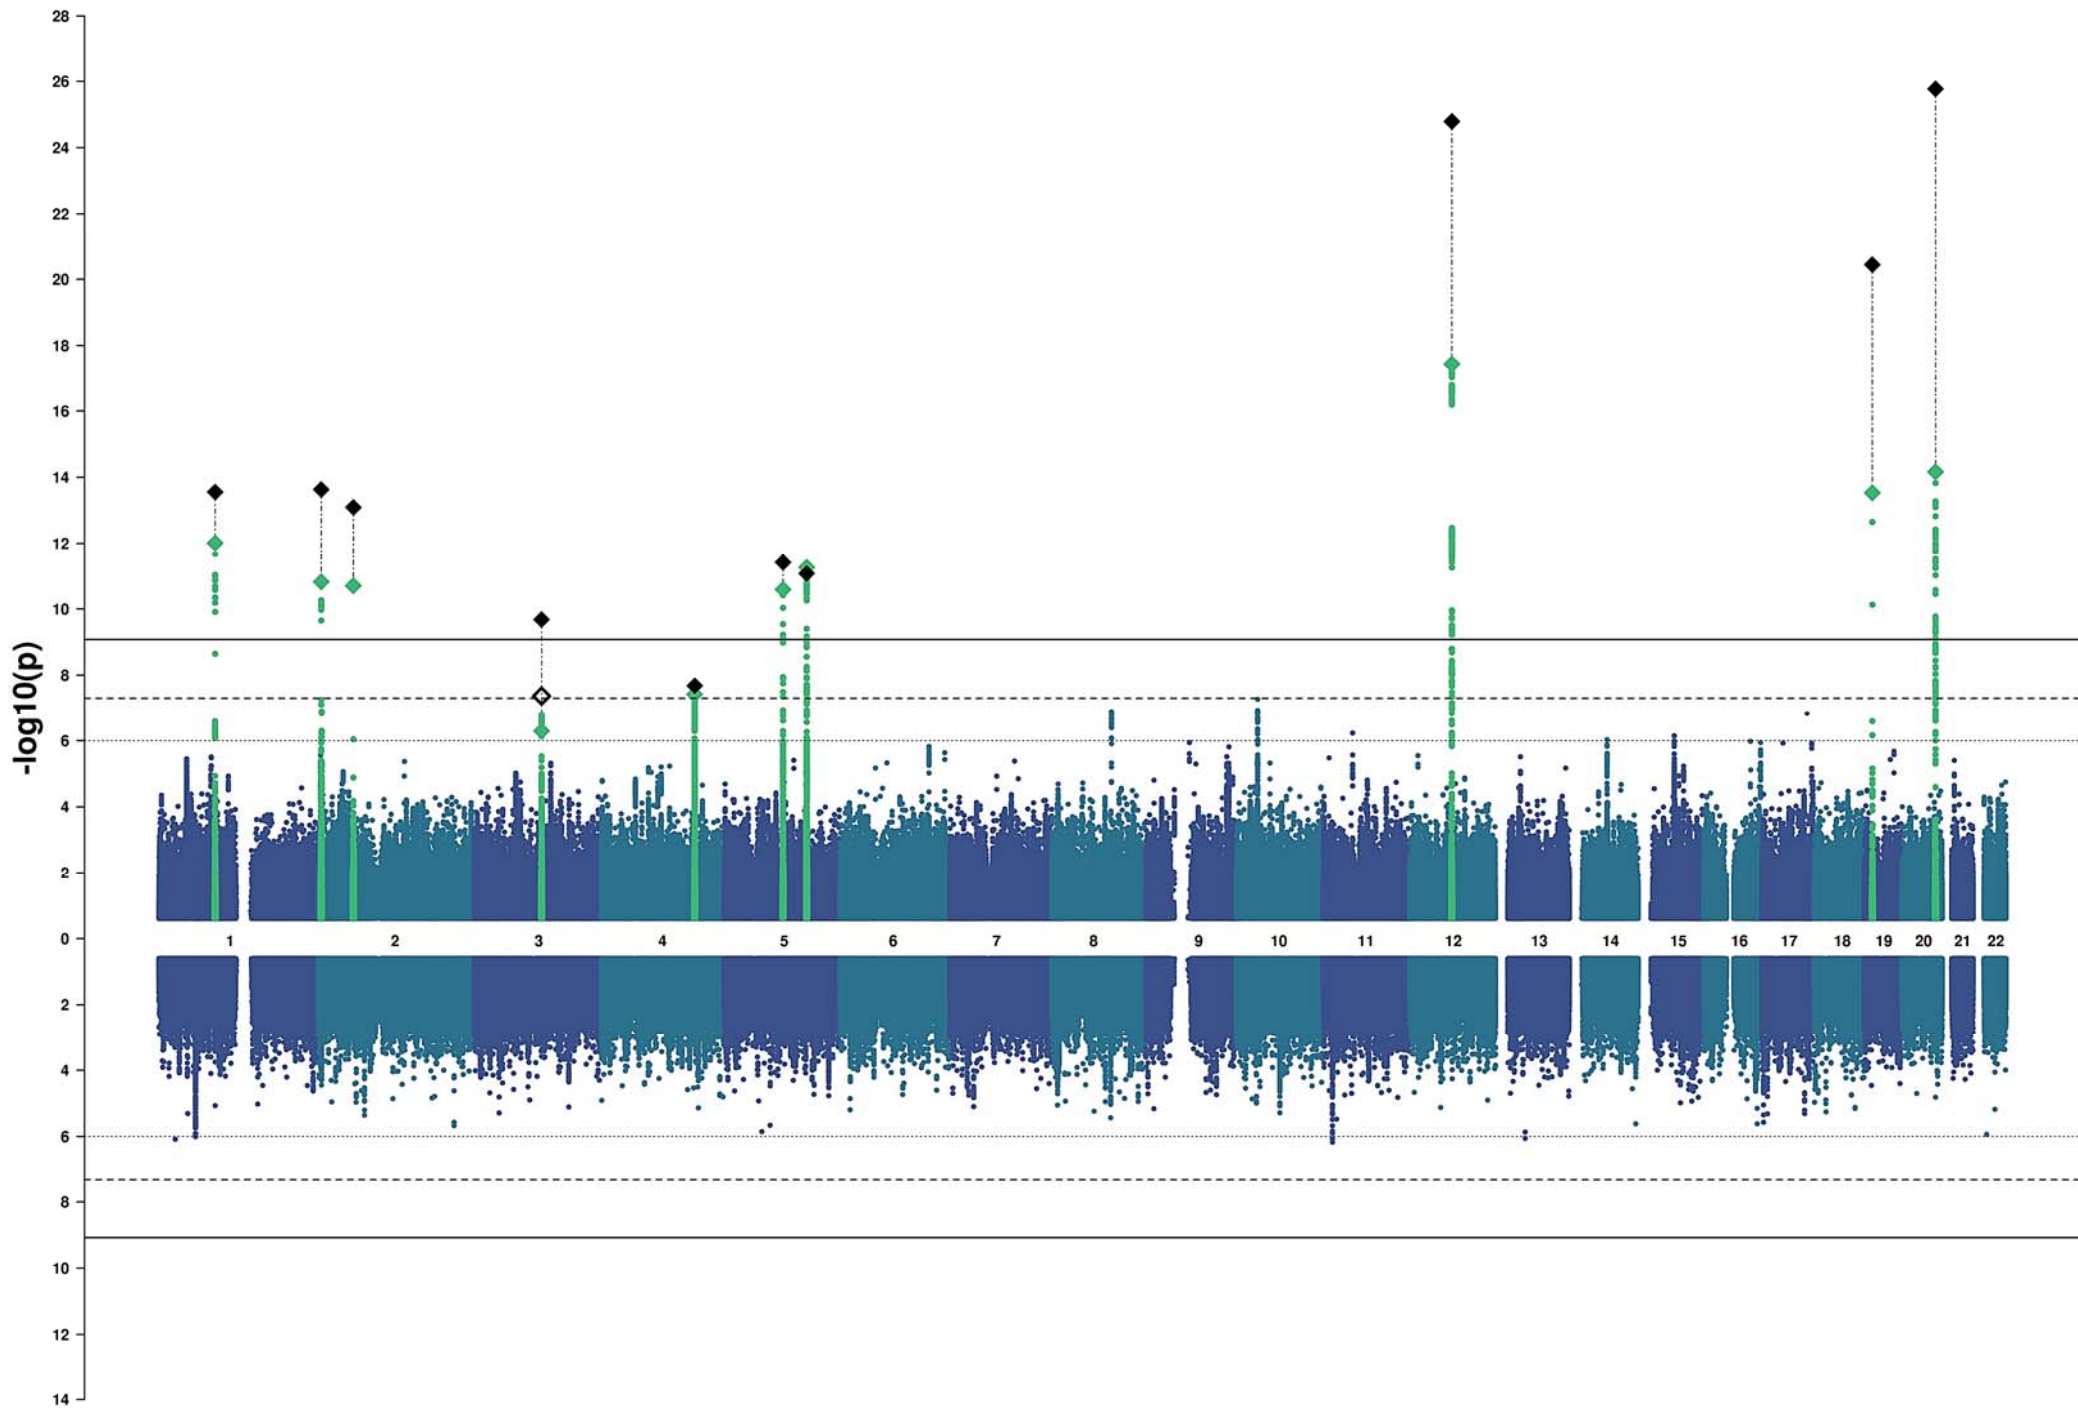

# Posterior Cingulate

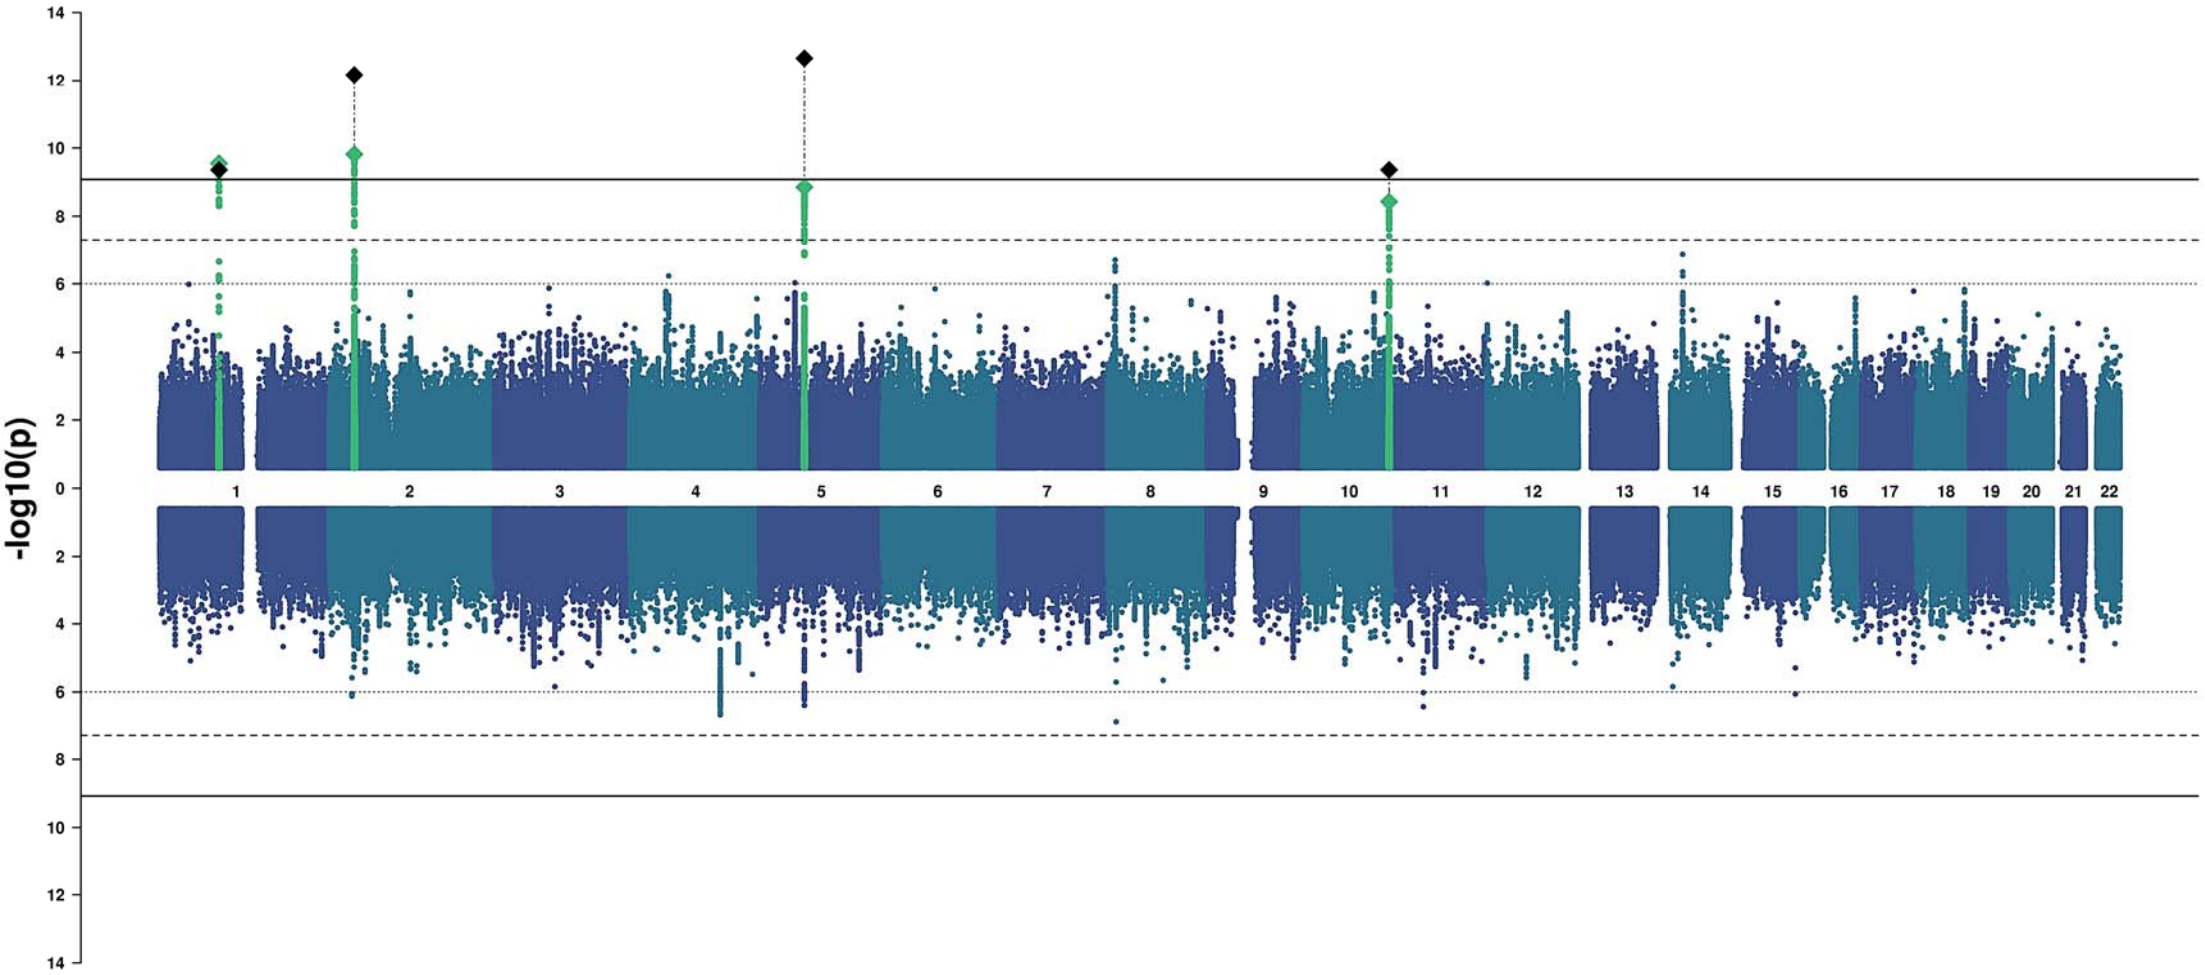

# Isthmus Cingulate

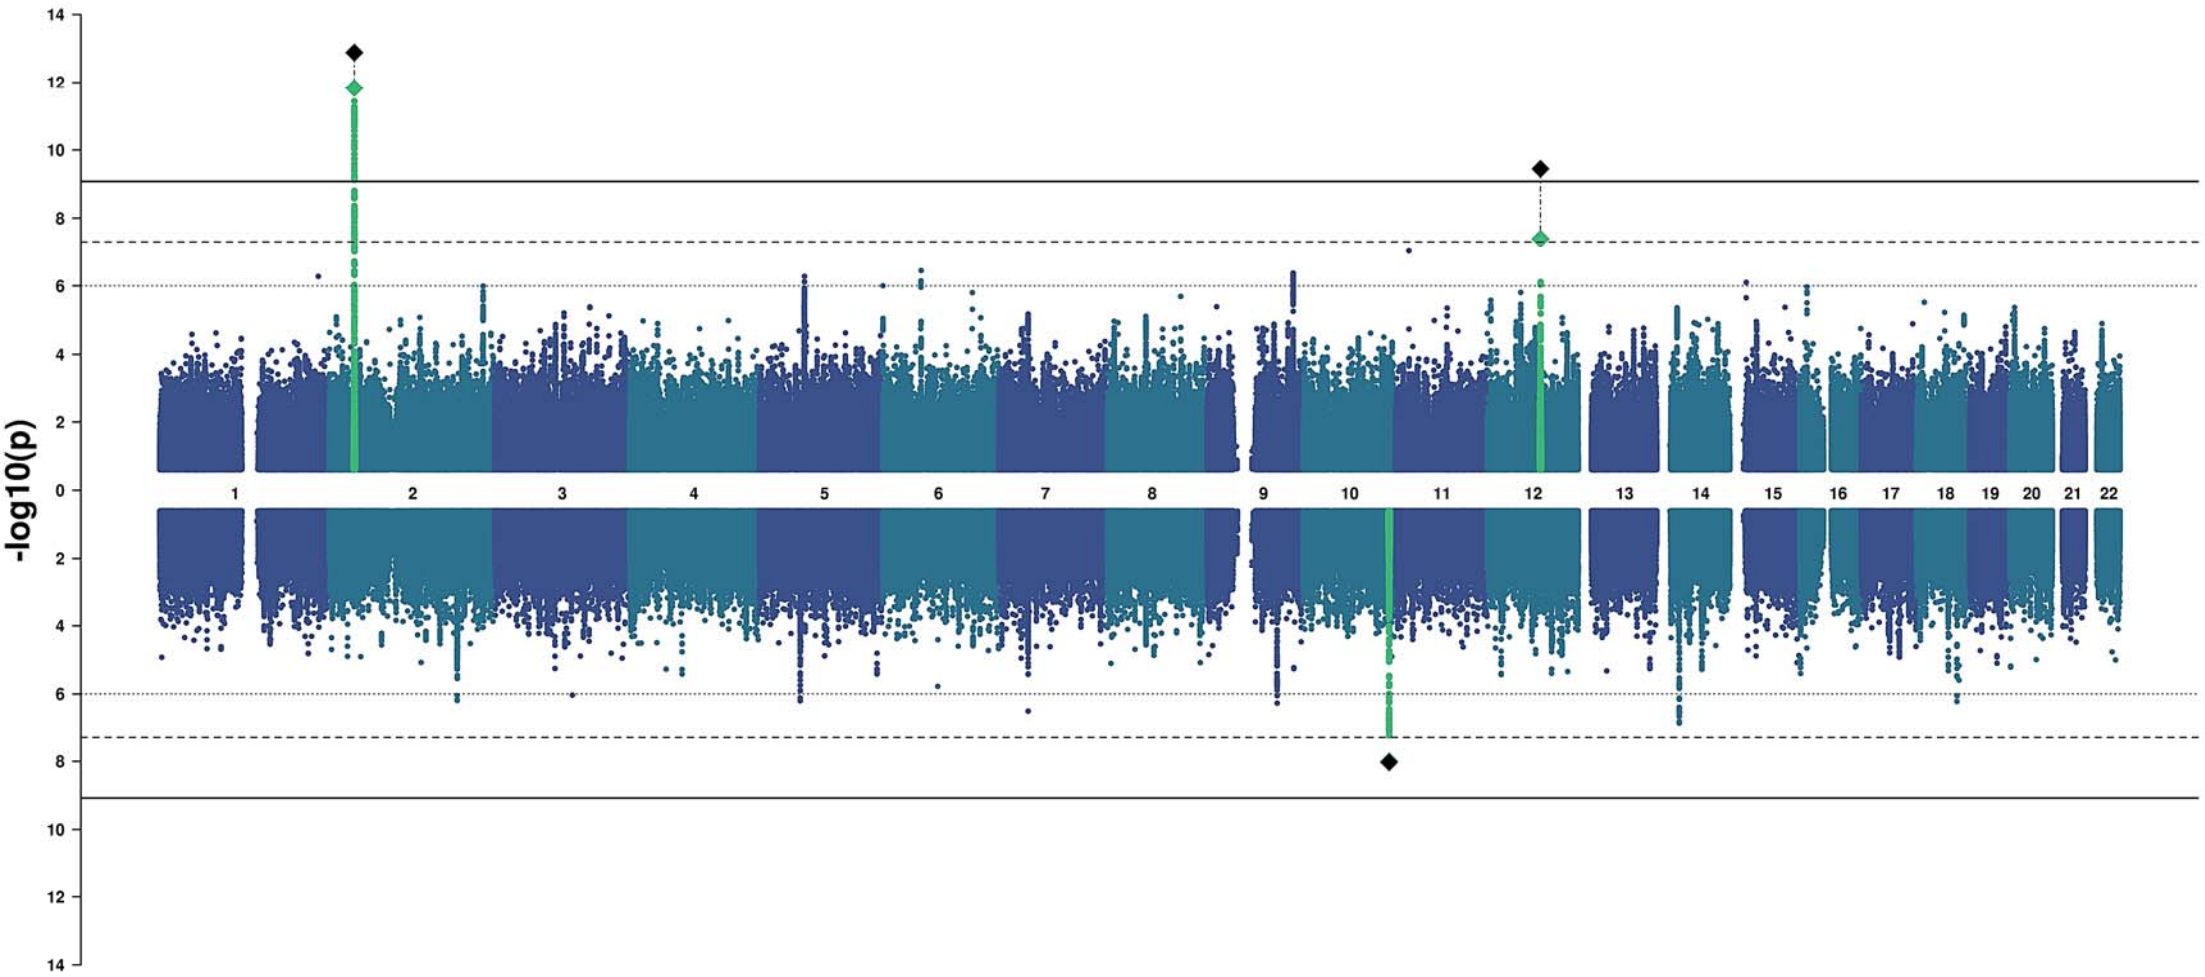



# Insula

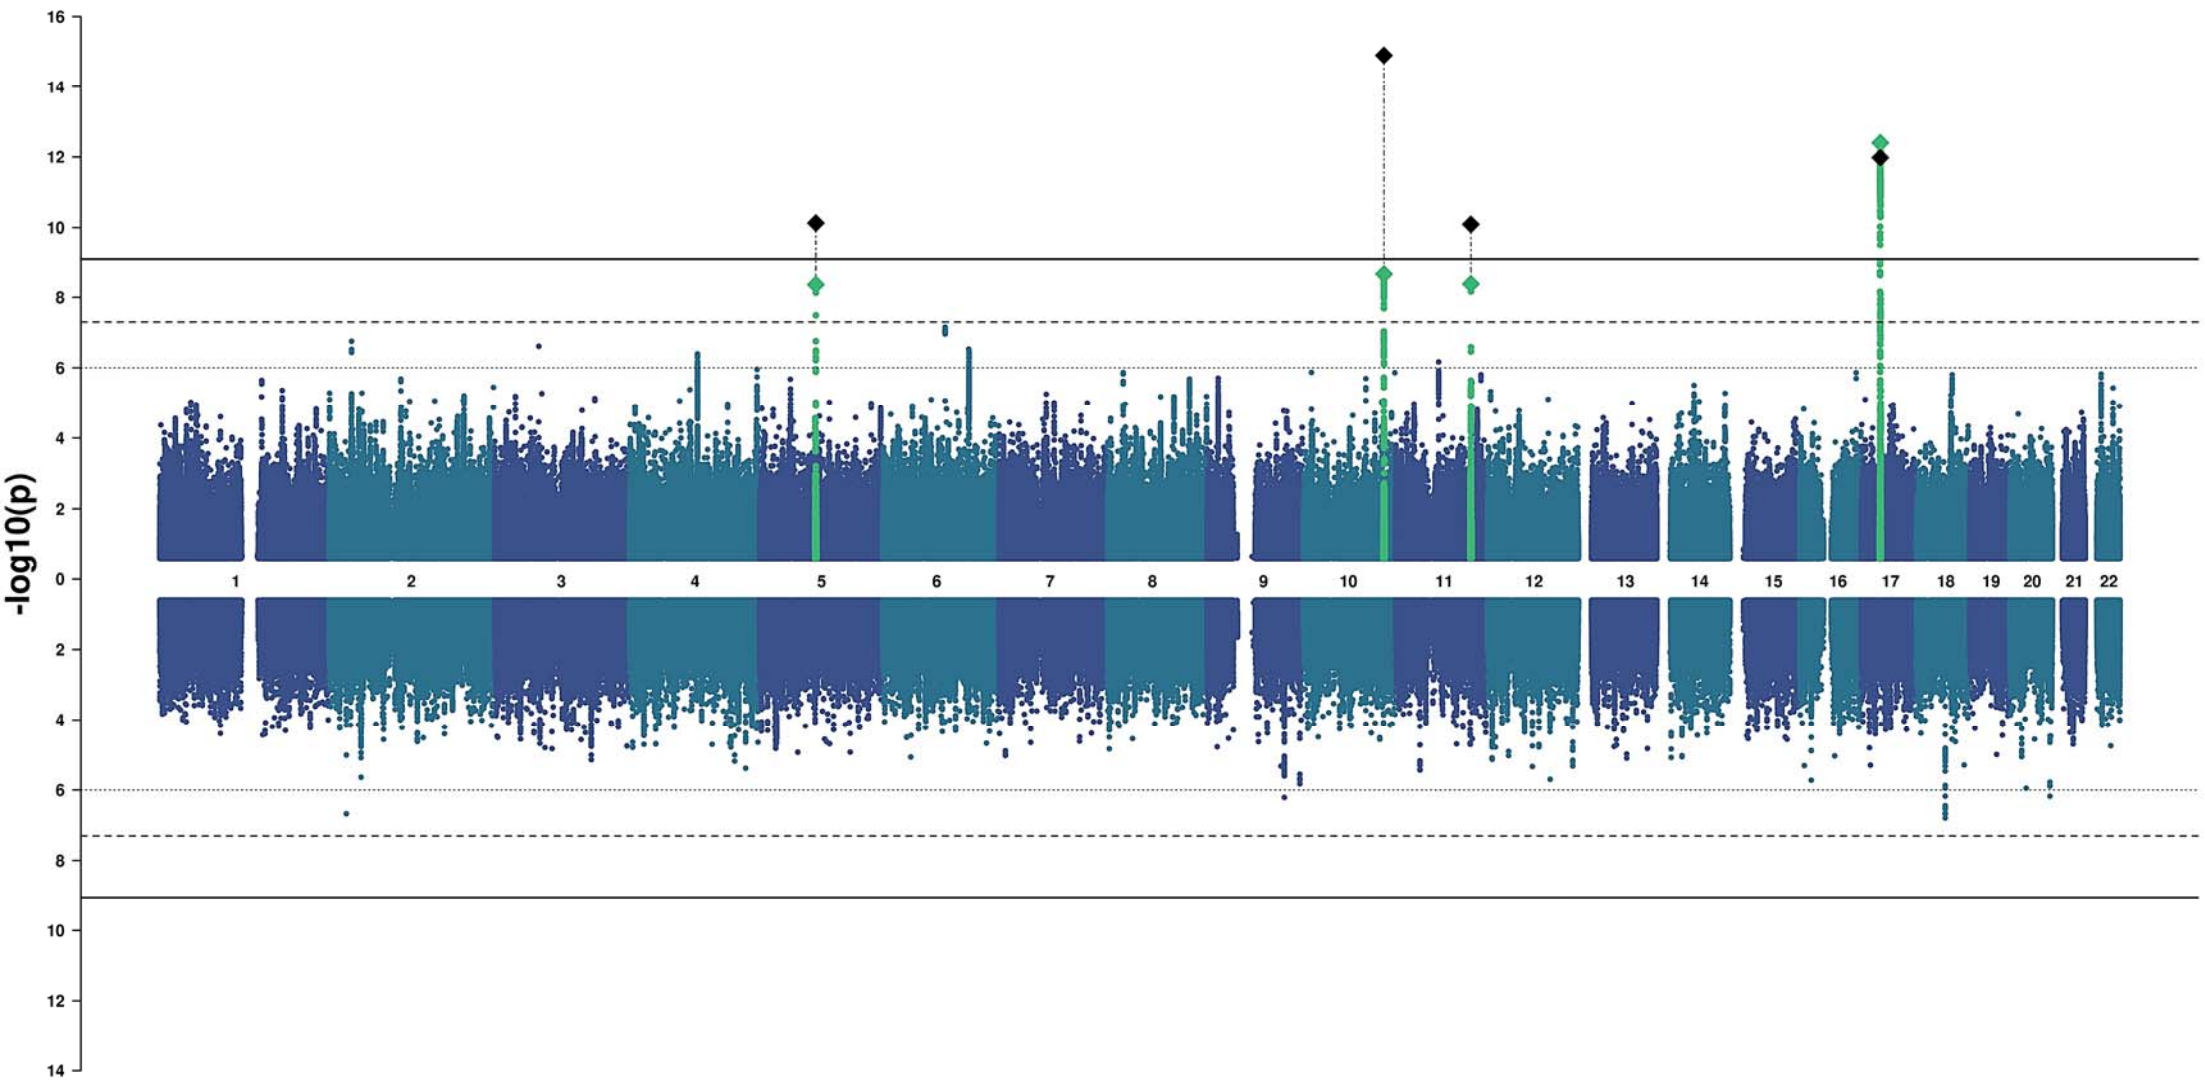



# Entorhinal

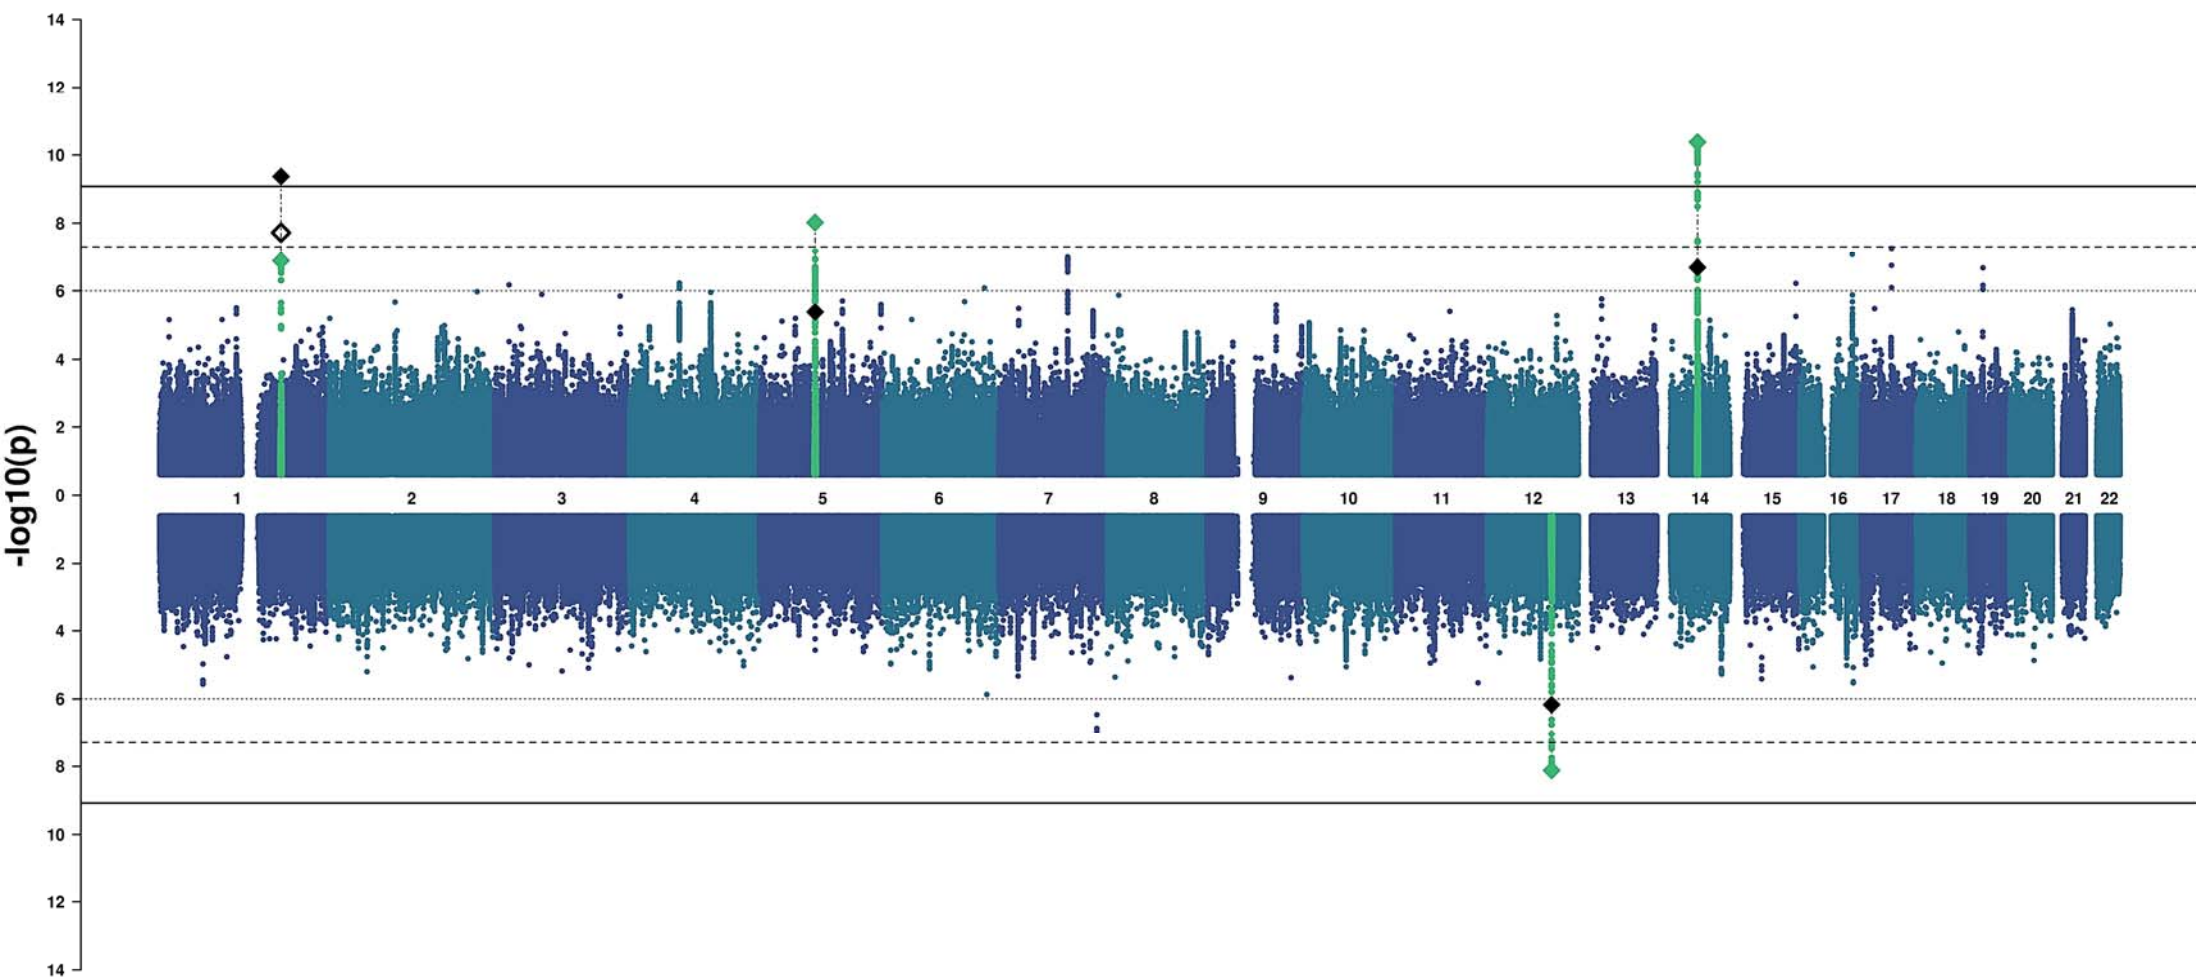

# Parahippocampal

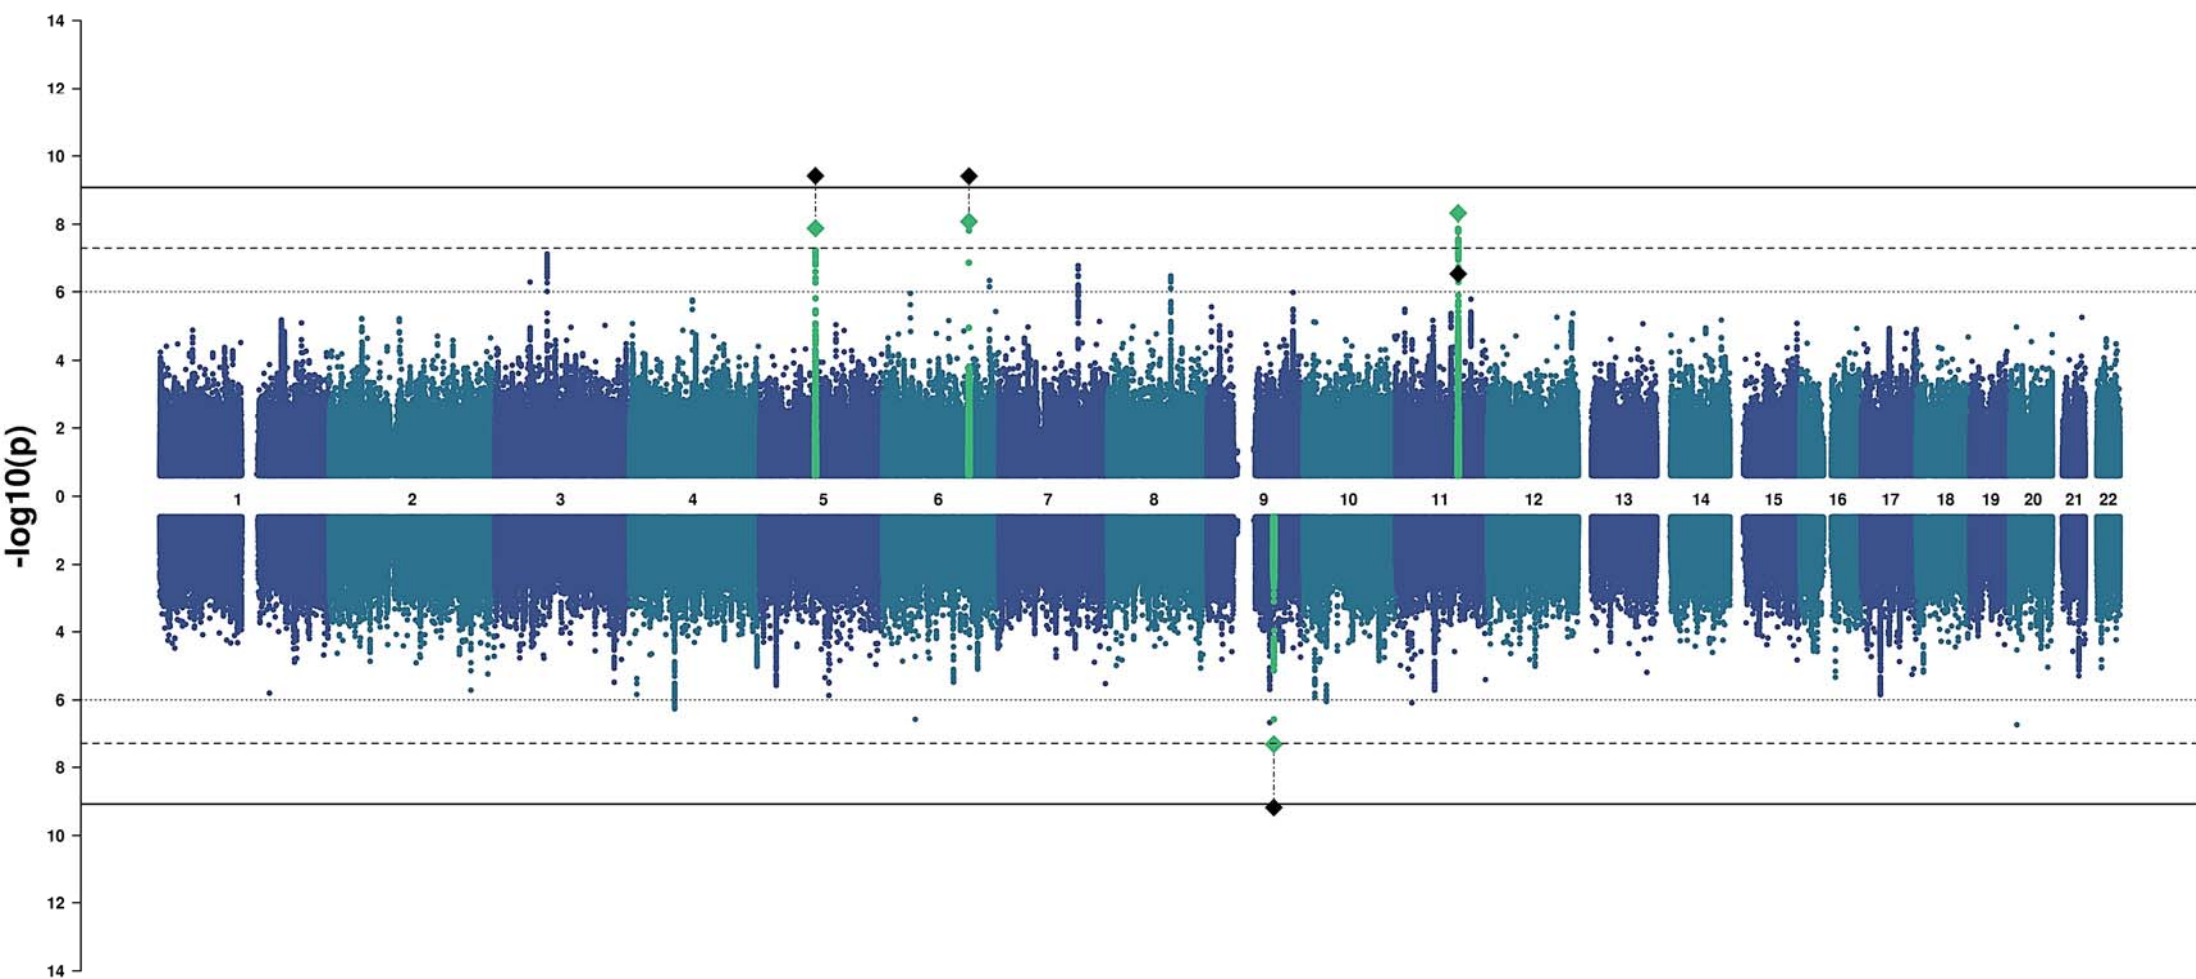

# Fusiform

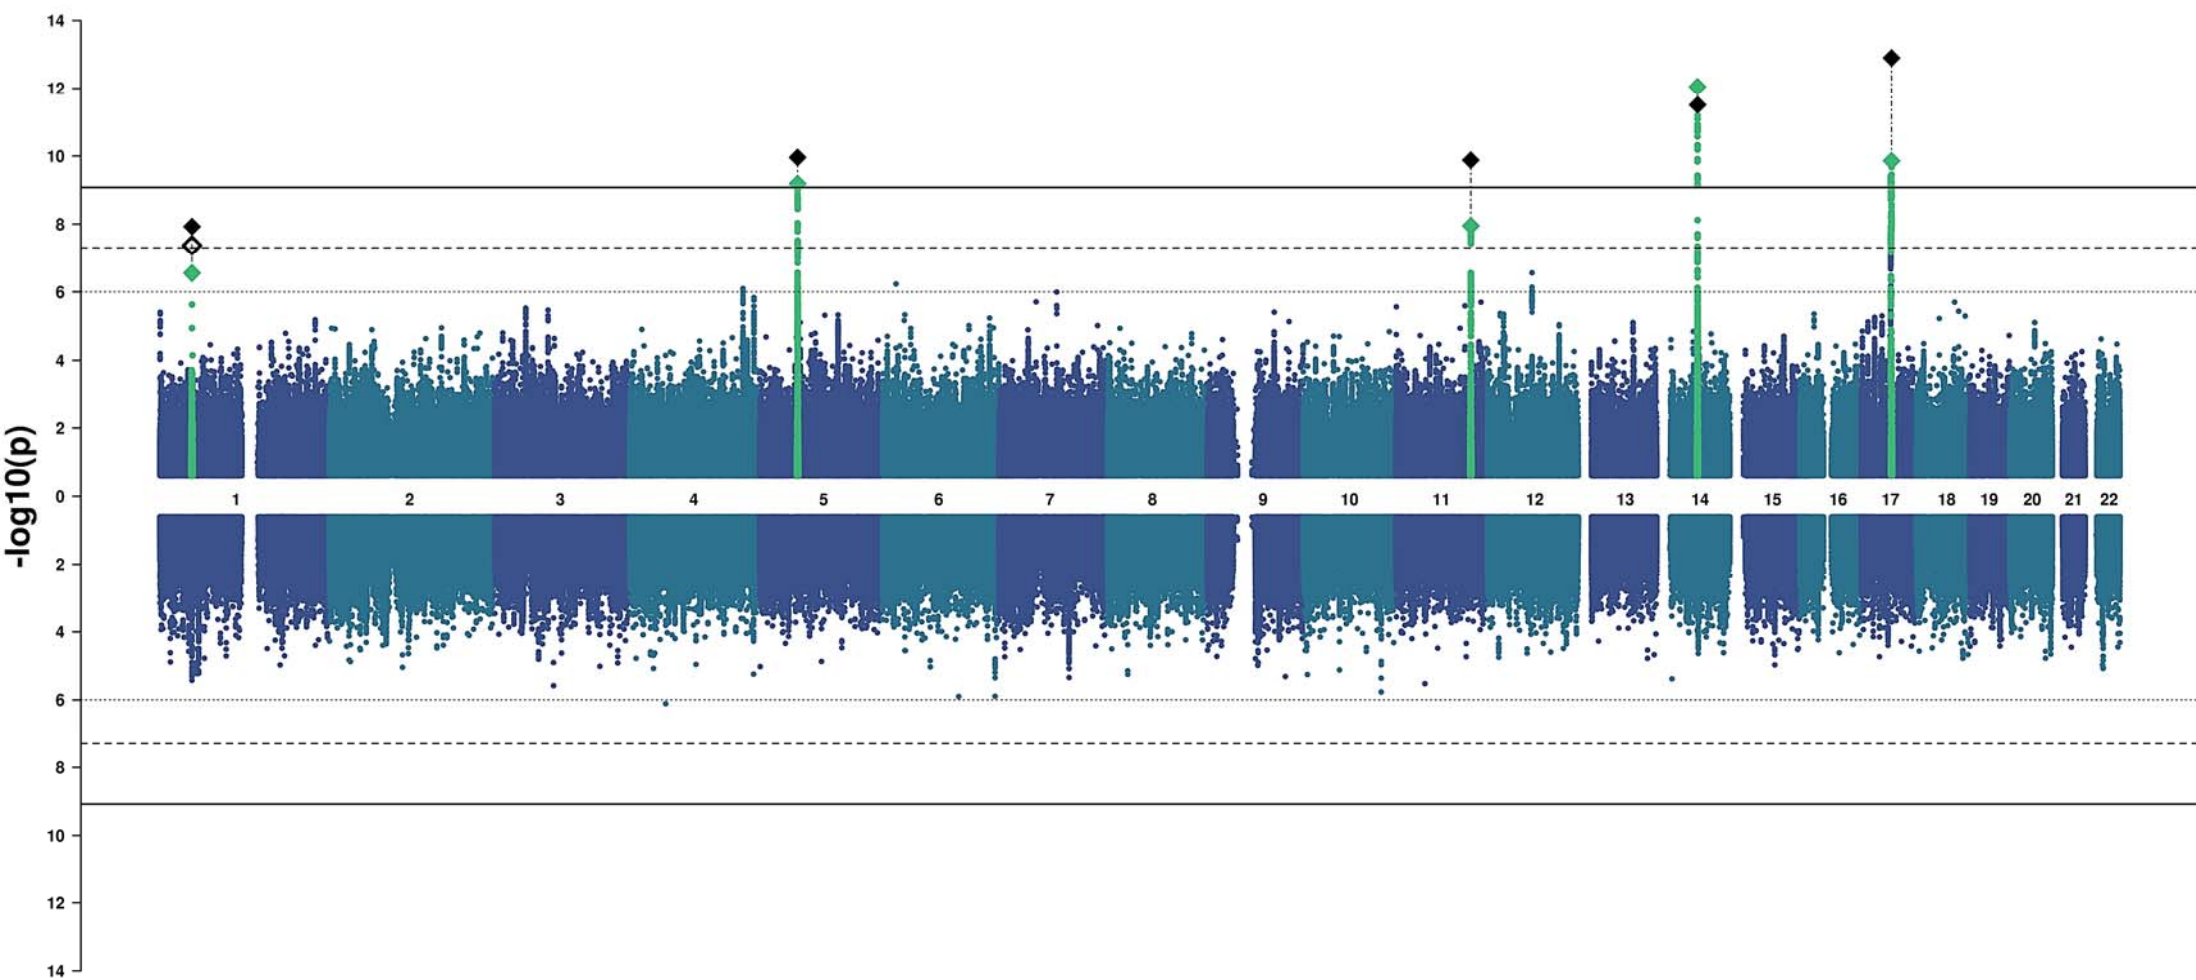

# Temporal Pole

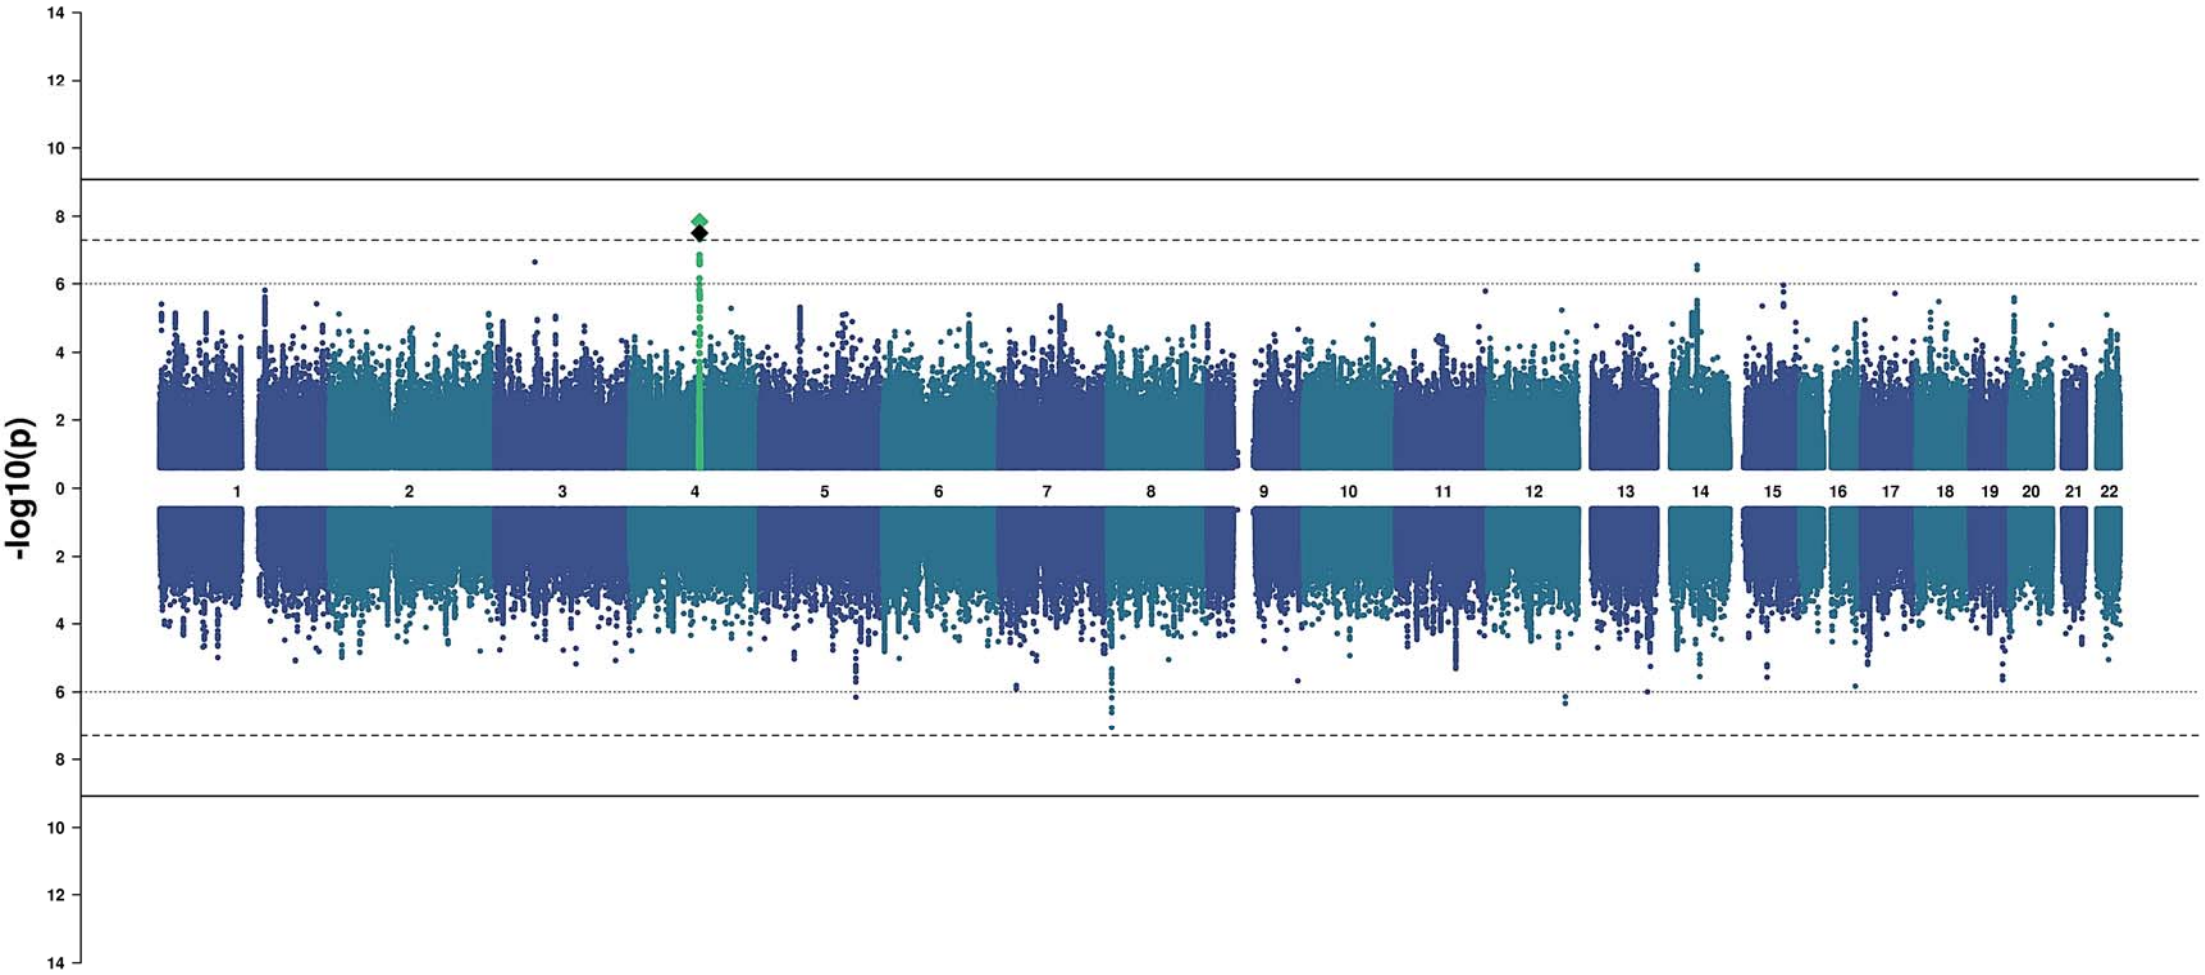



# Inferior Temporal

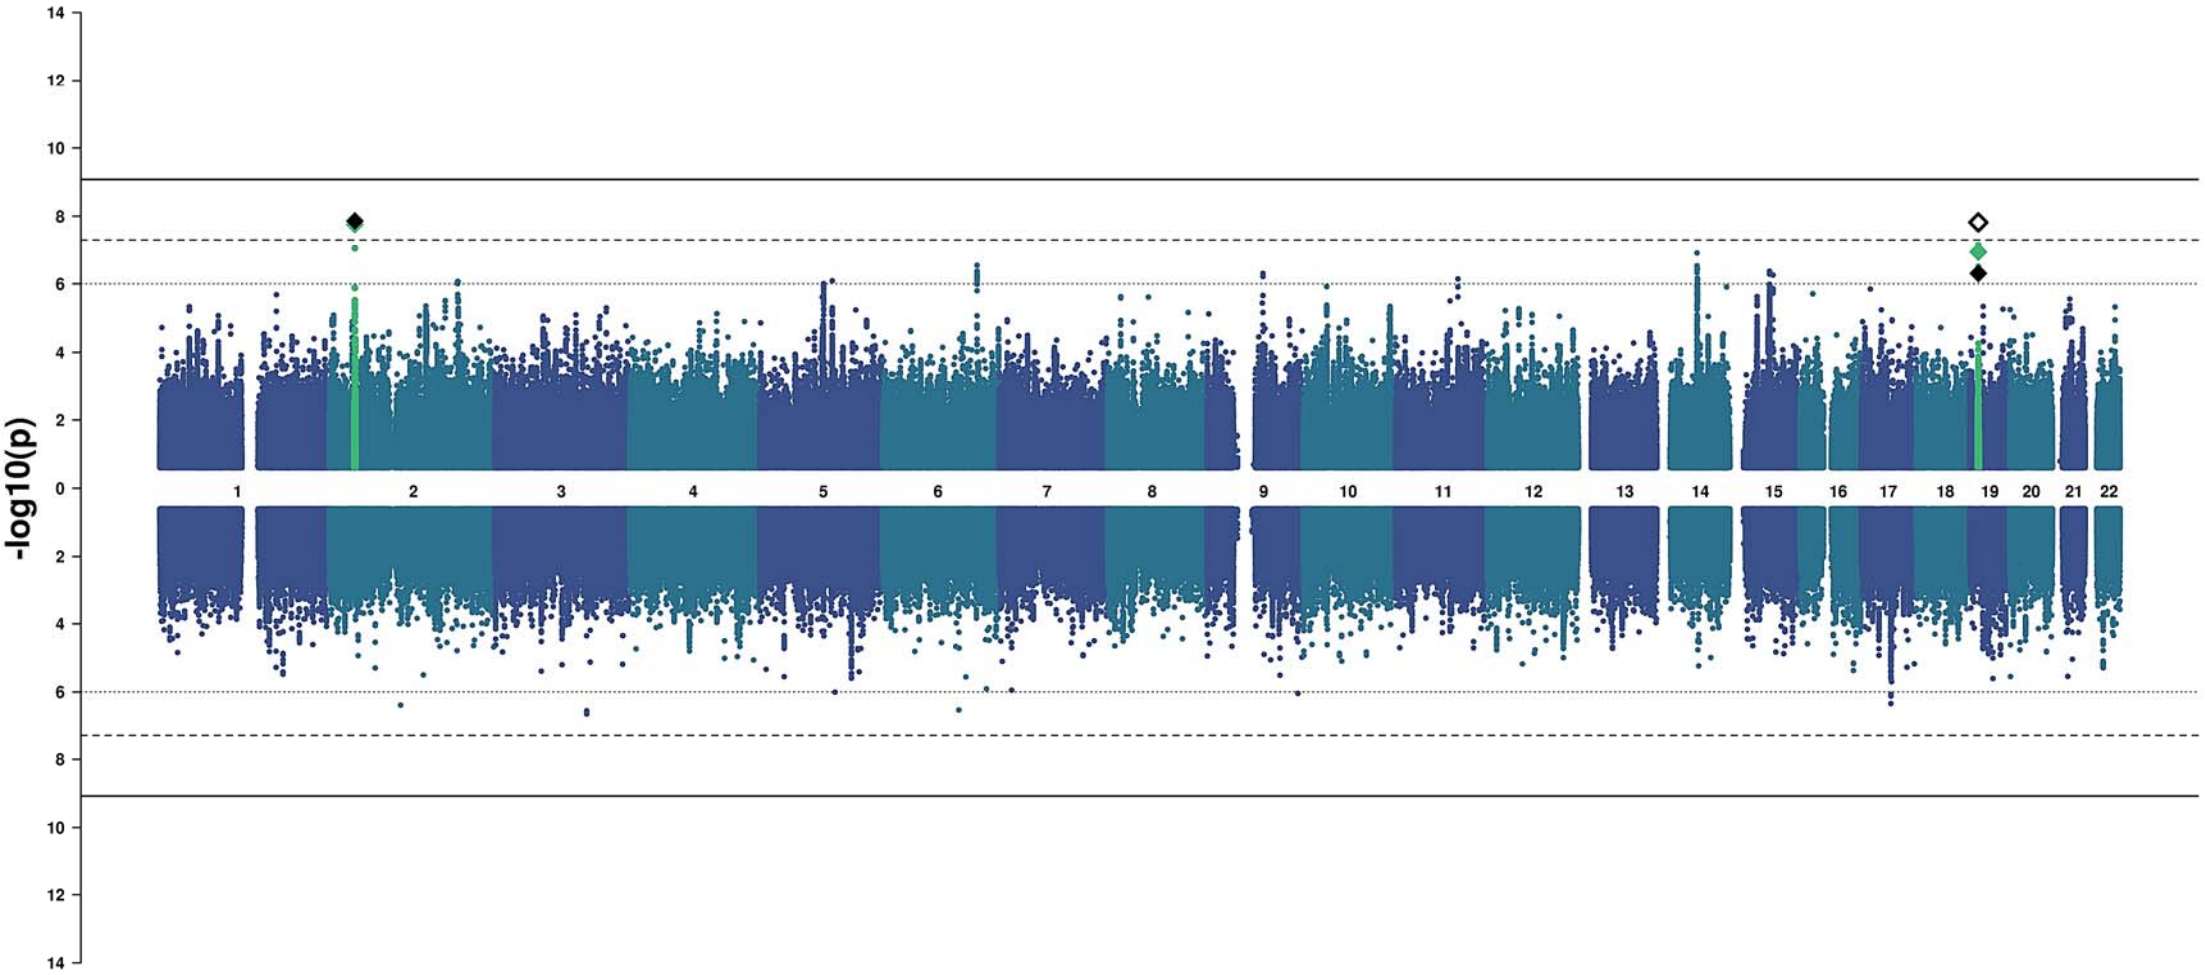



# Middle Temporal

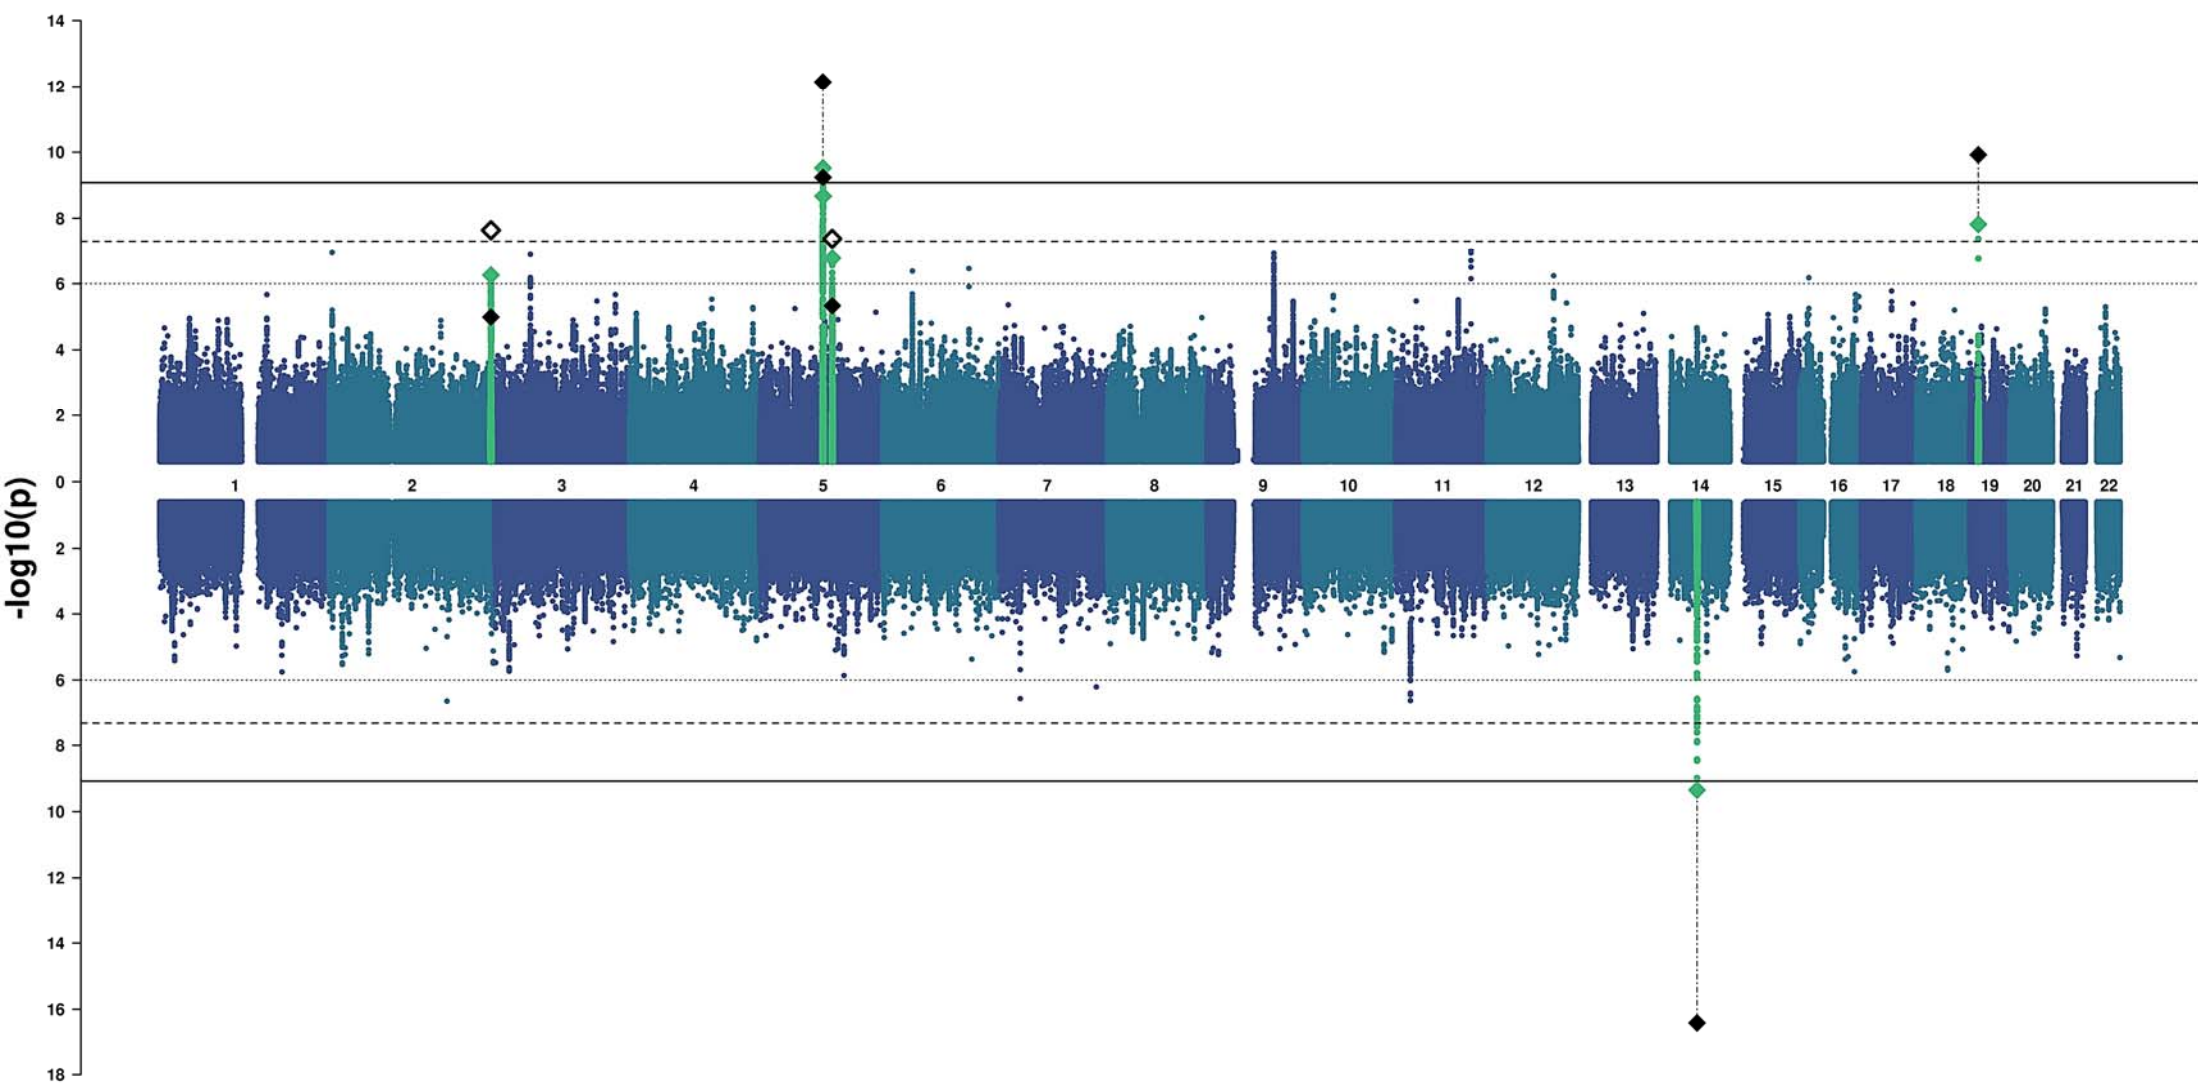

# Superior Temporal

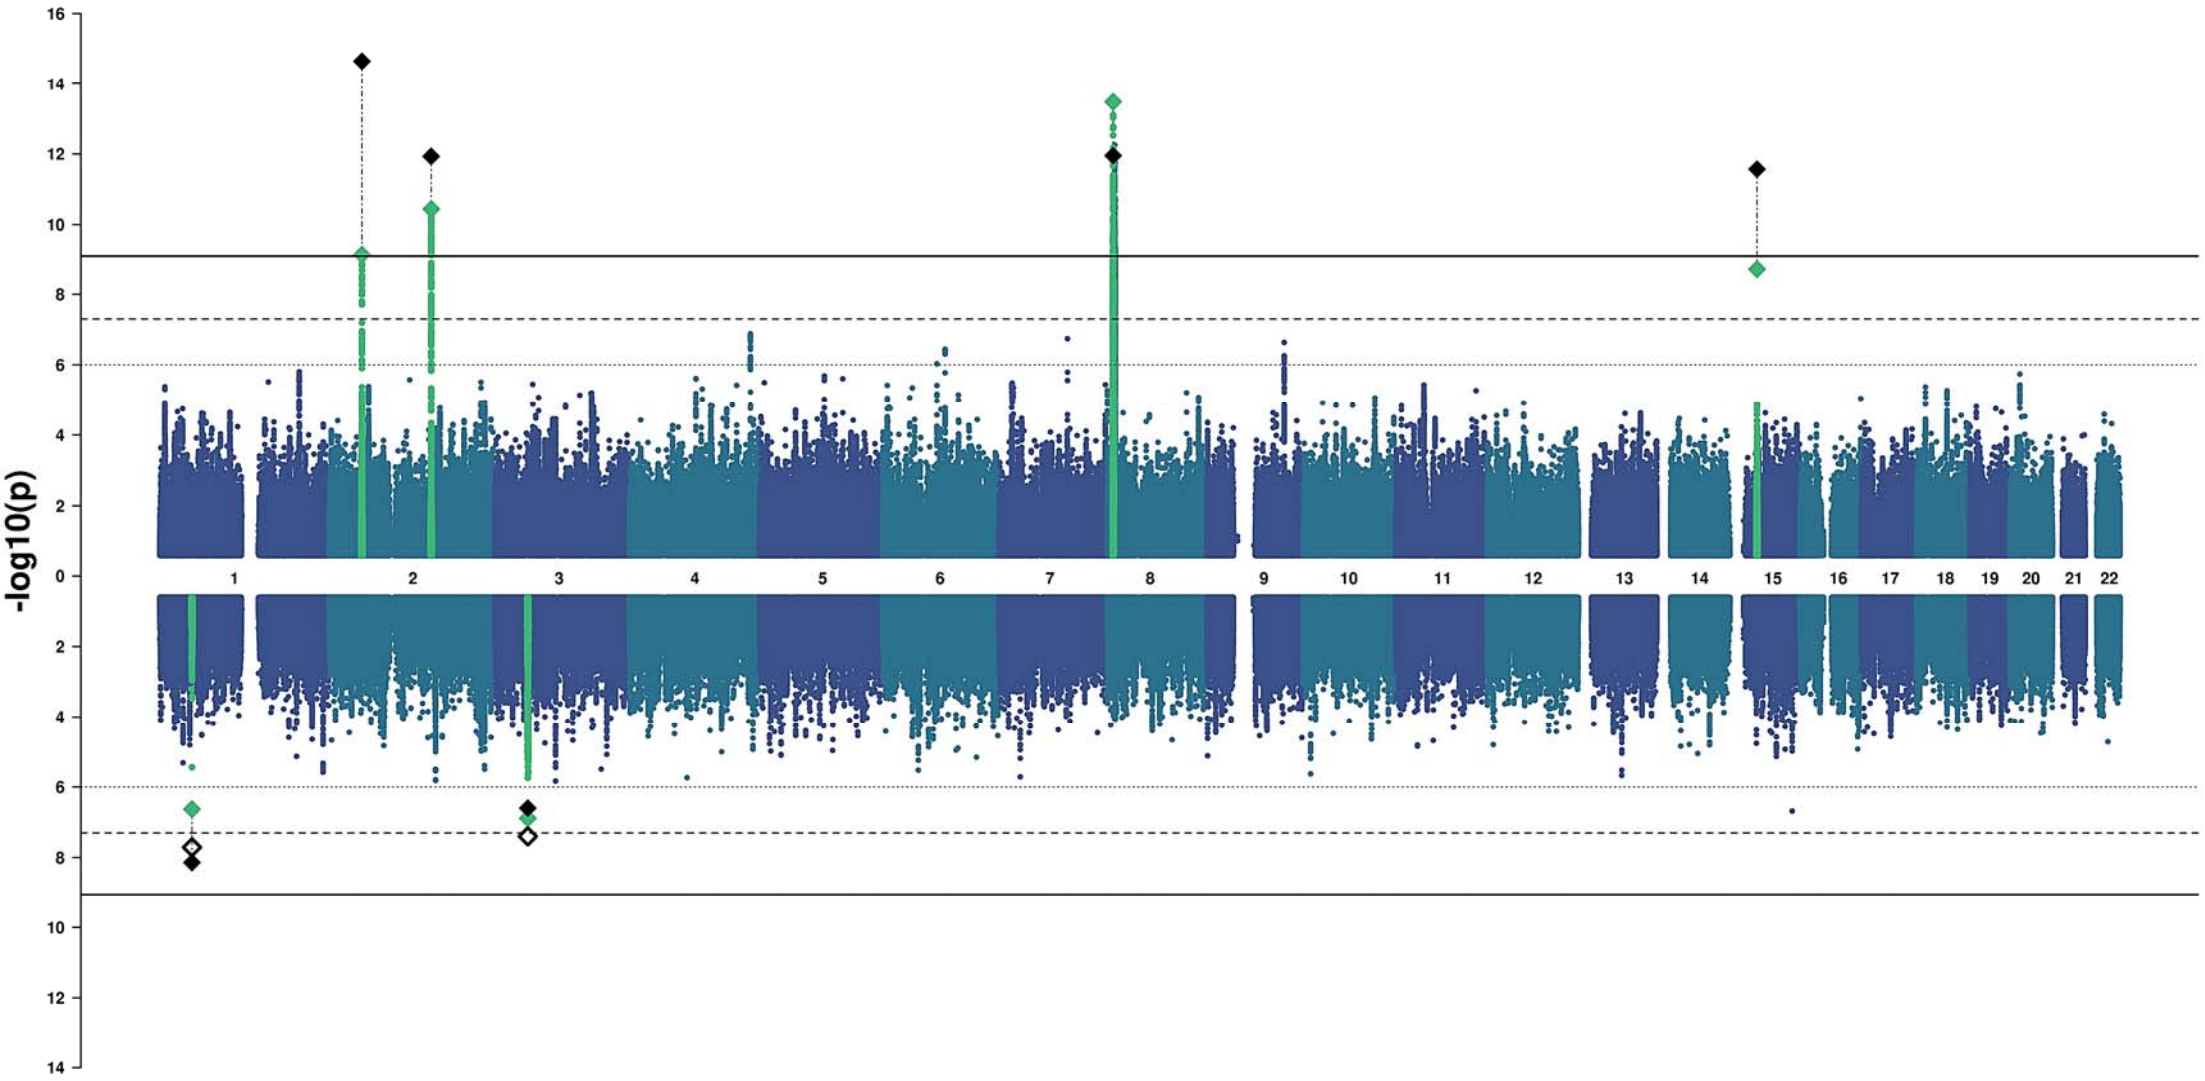

# Banks of the Superior Temporal Sulcus

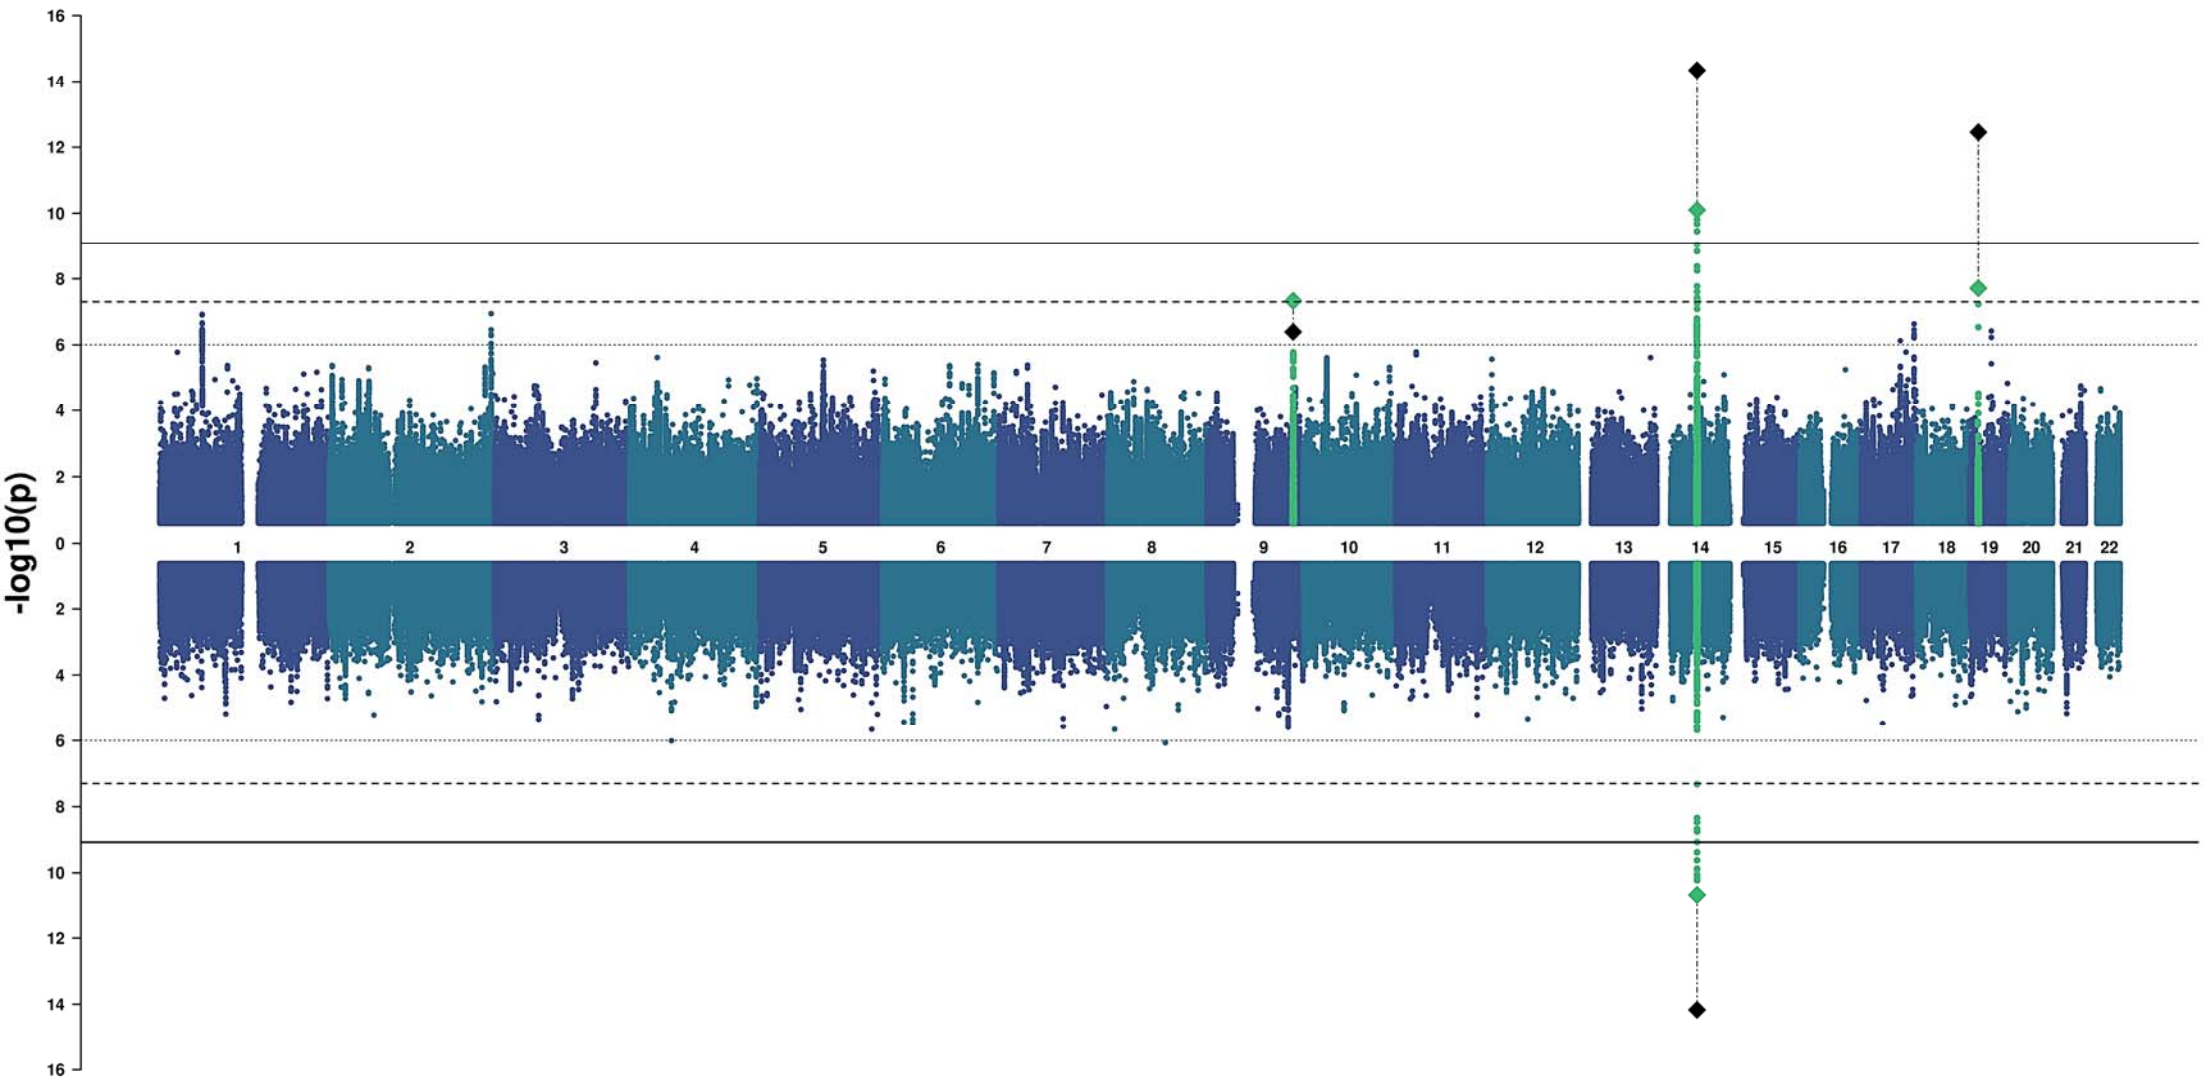

# Transverse Temporal

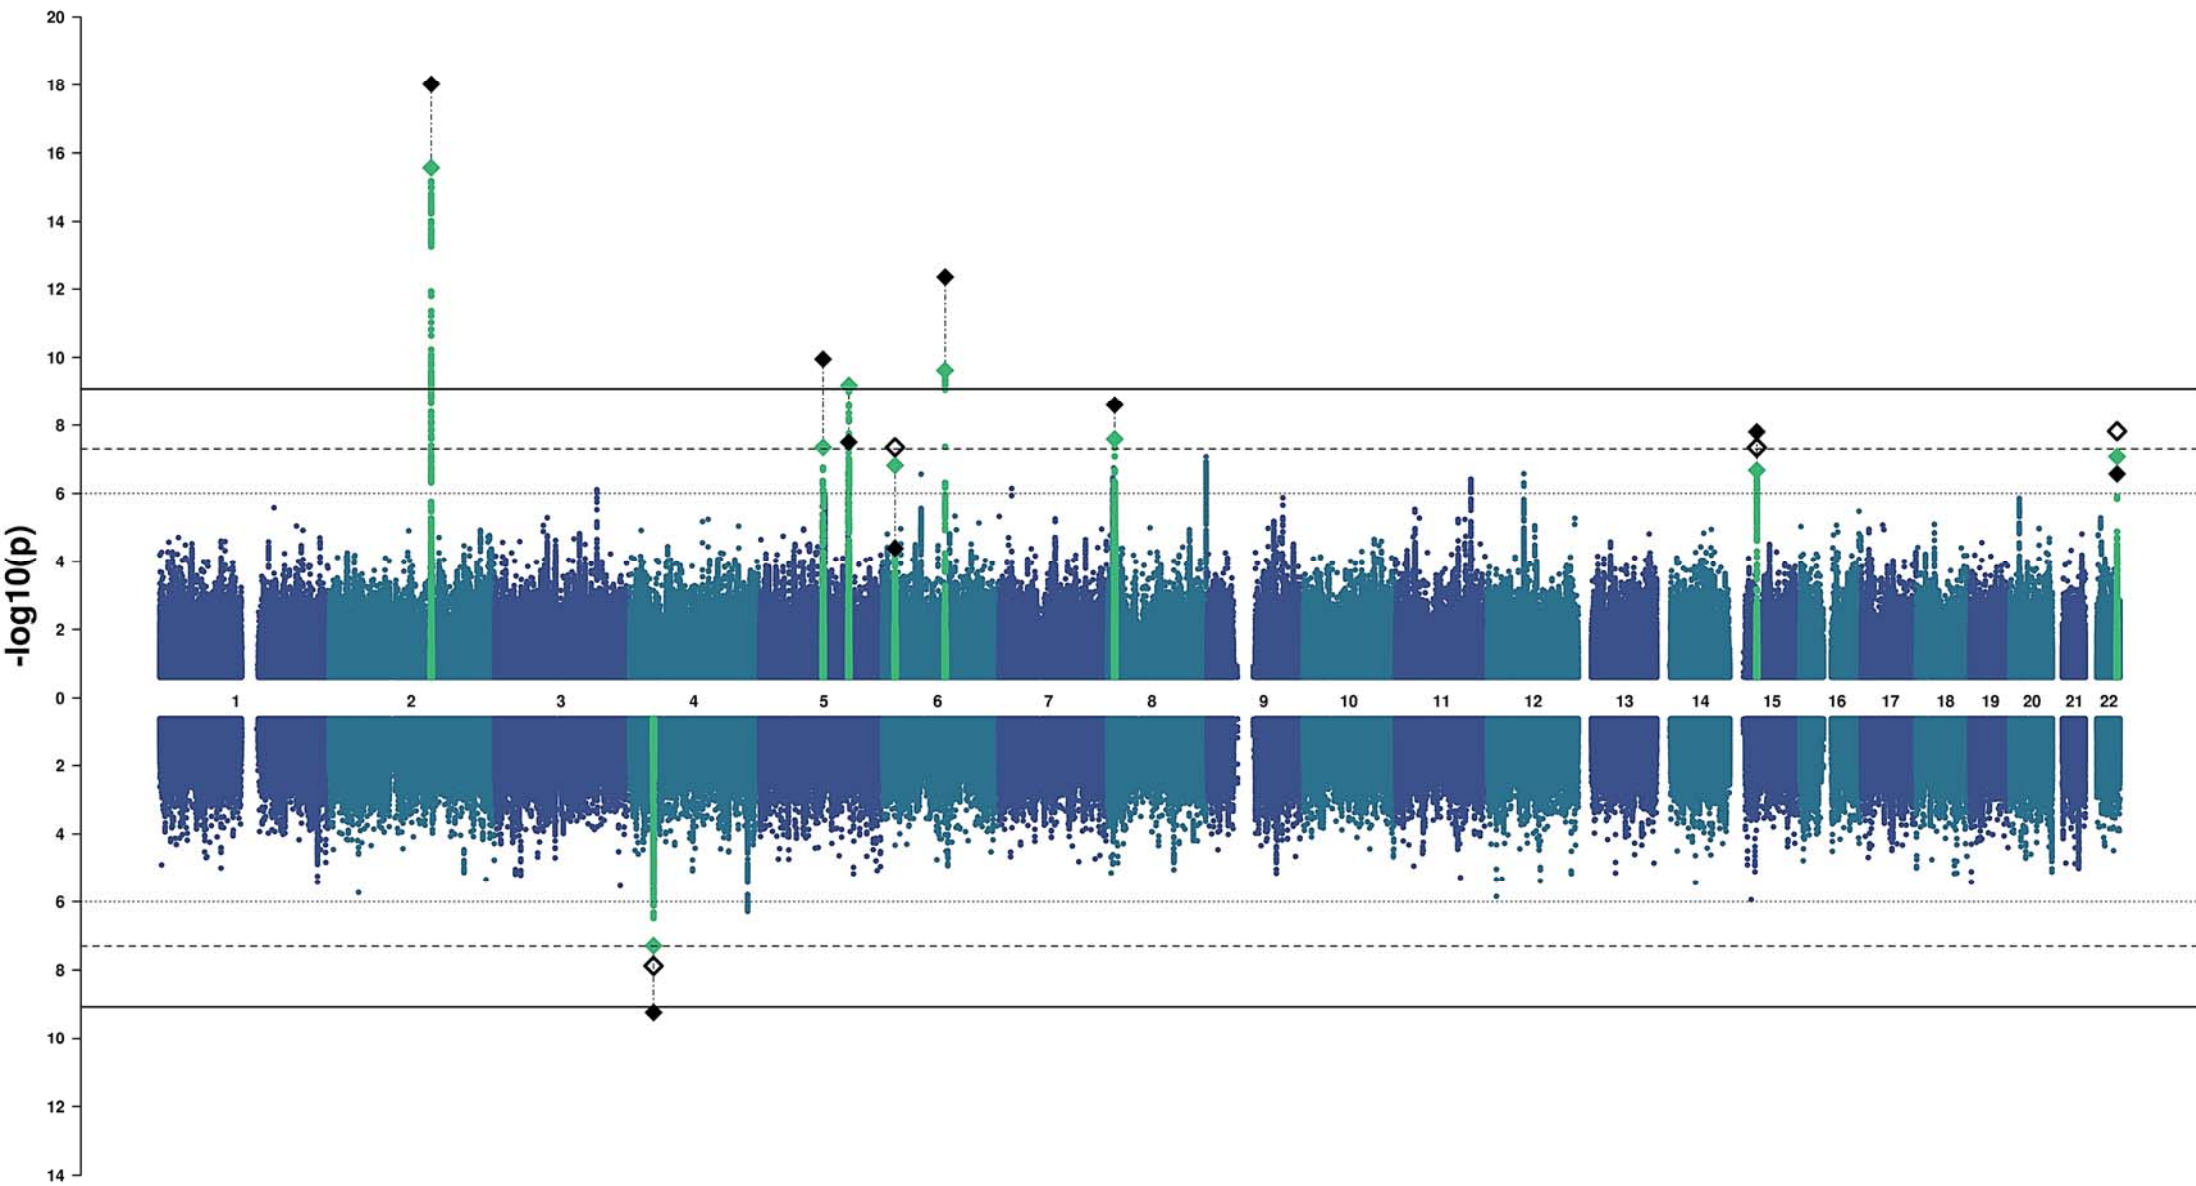



# Lingual

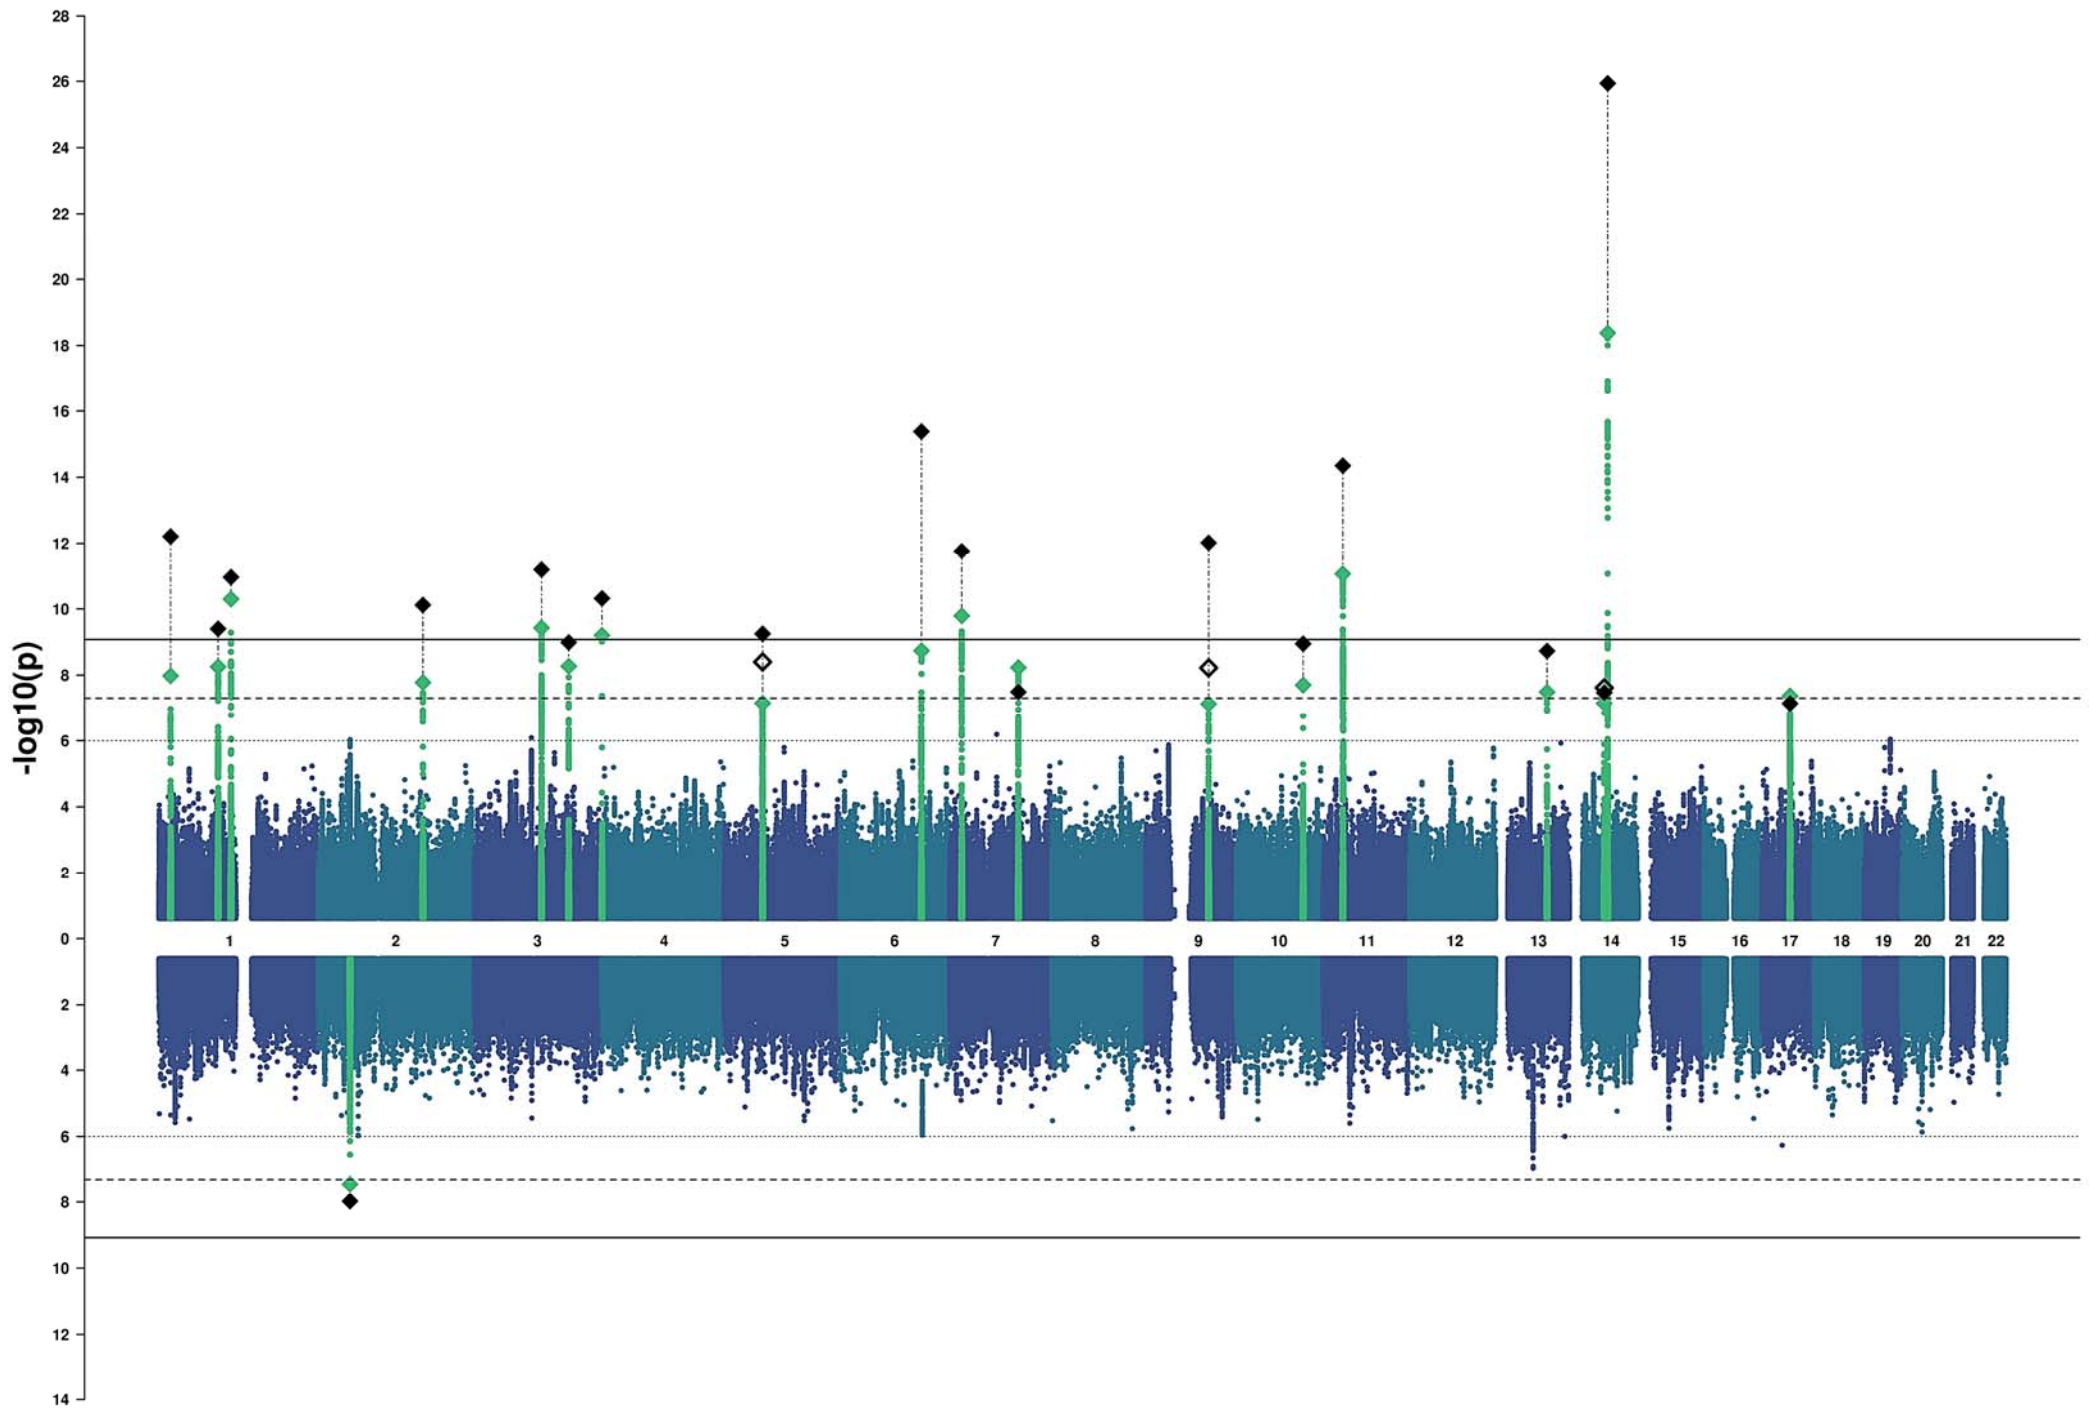



# Pericalcarine

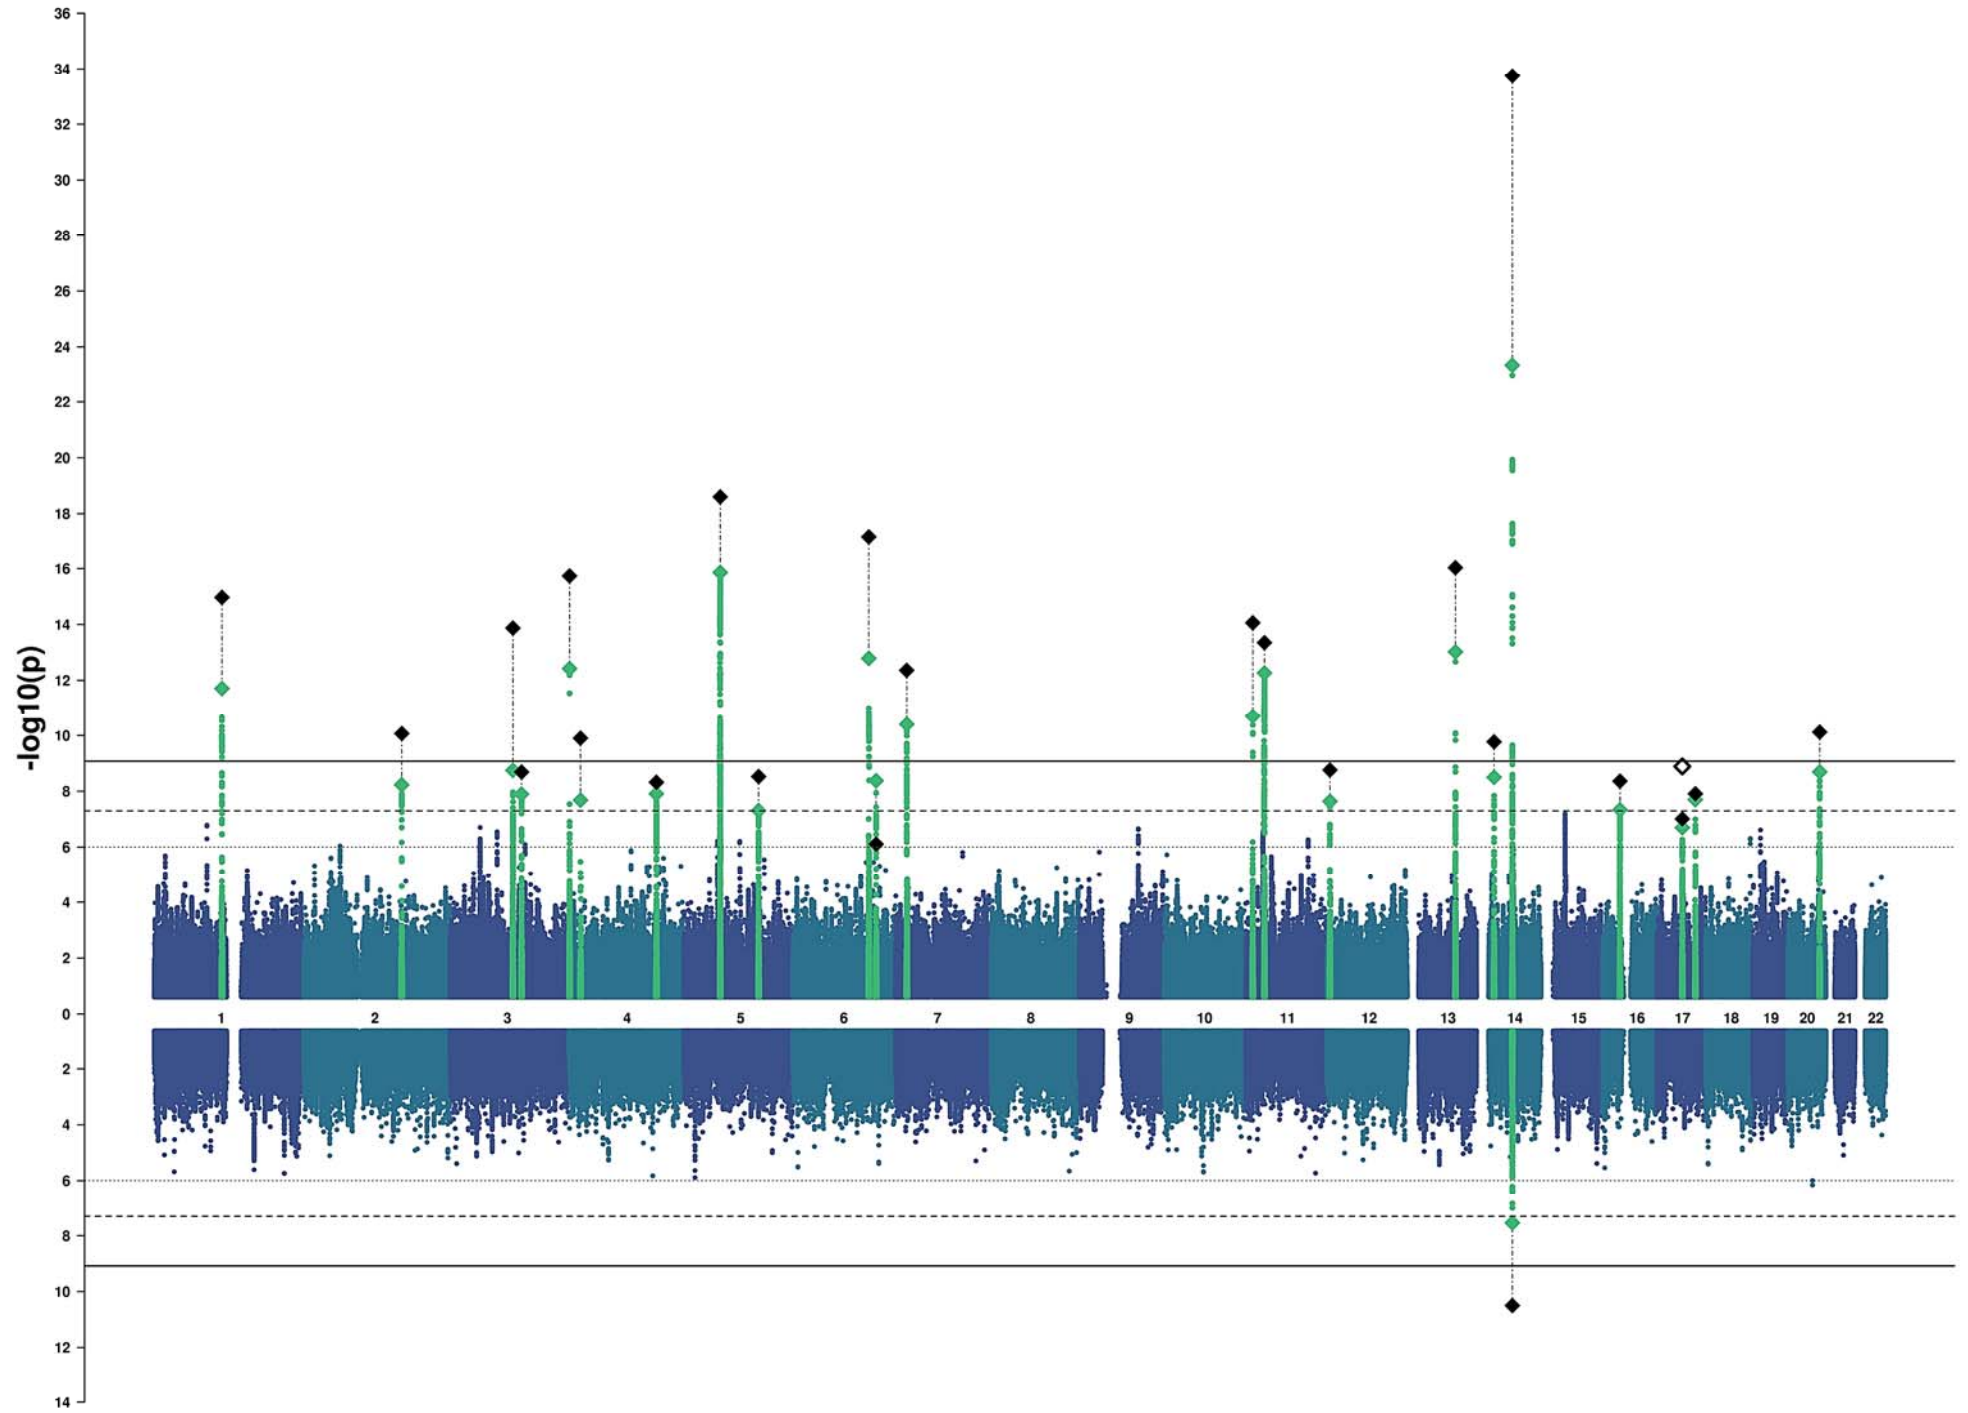

# Cuneus

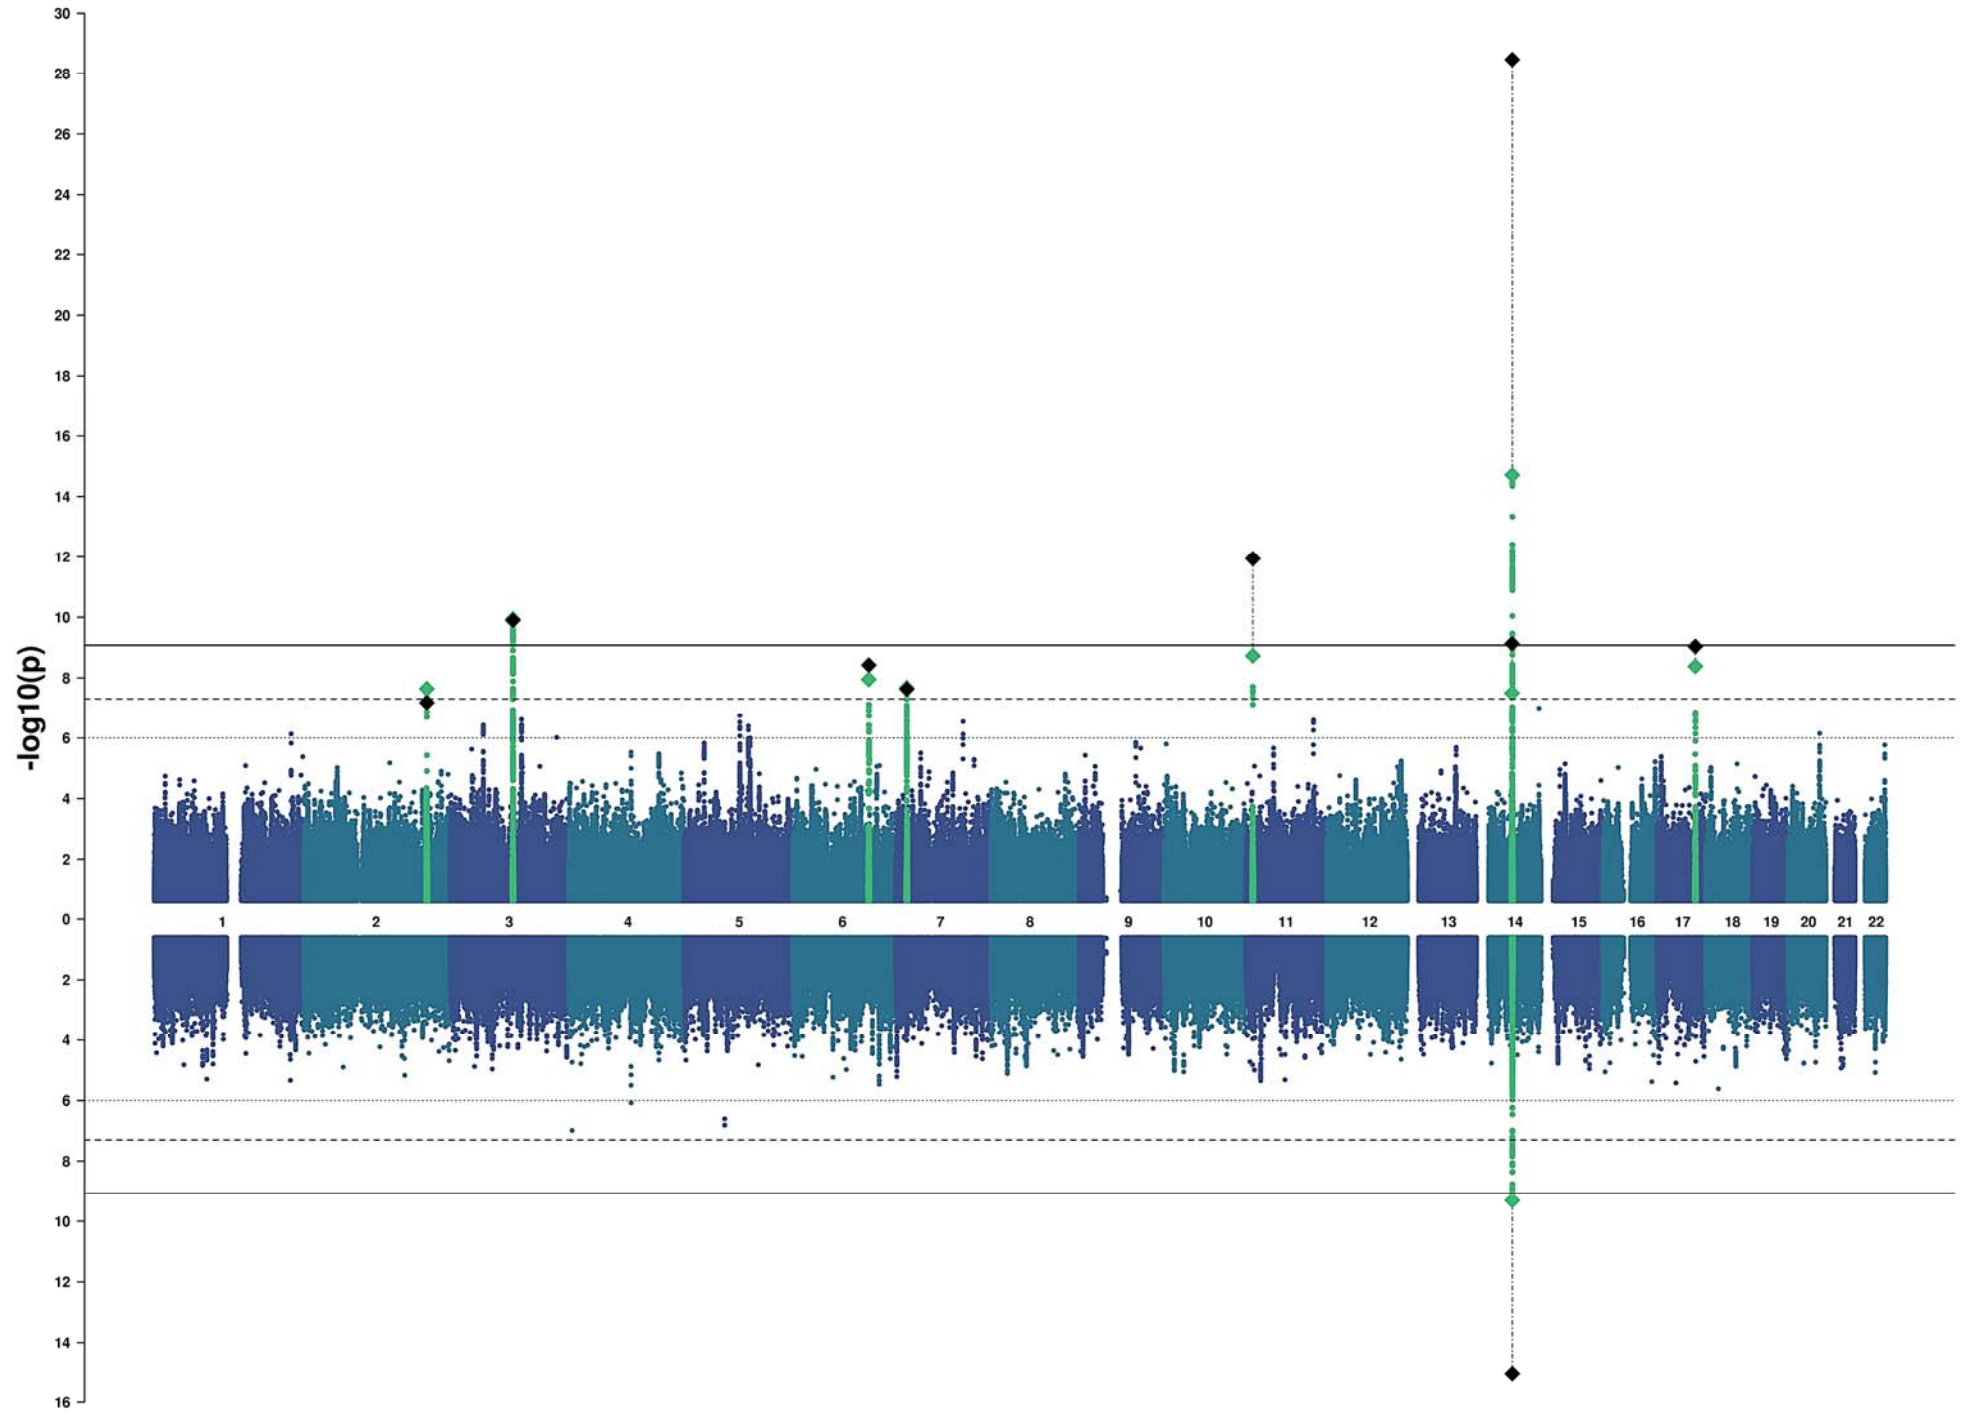

# Lateral Occipital

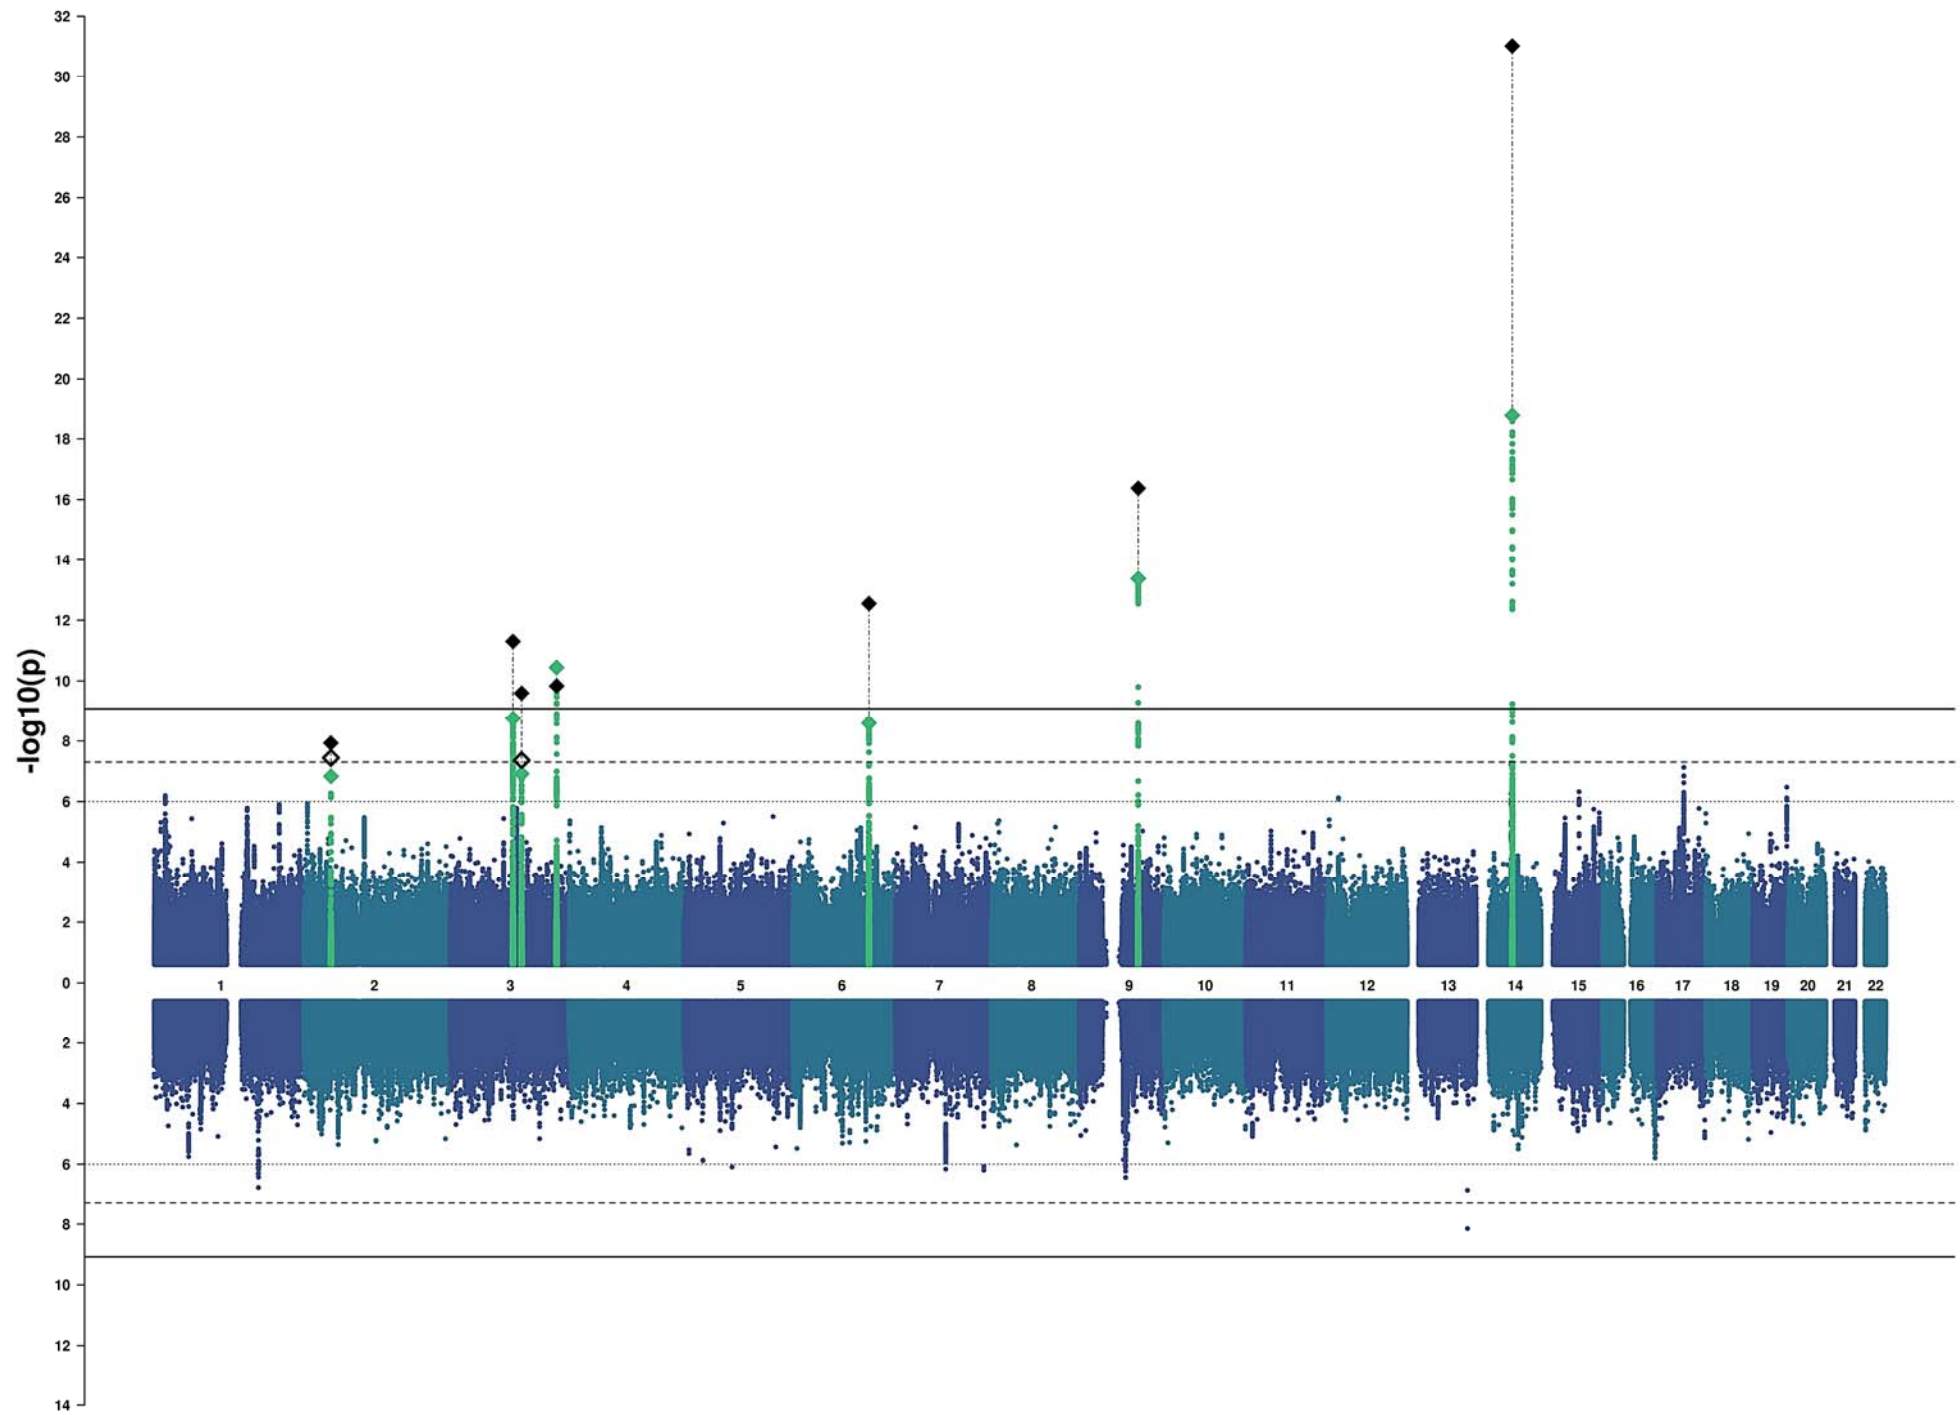

Supplement: Supplementary file [file 399402-9.pdf]
