# Supplementary material for: The genetic architecture of the human cerebral cortex
Source: bioRxiv or medRxiv preprint supplement (doi:10.1101/399402), 2019-07-18
Supplement: Supplementary file [file 399402-1.pdf]

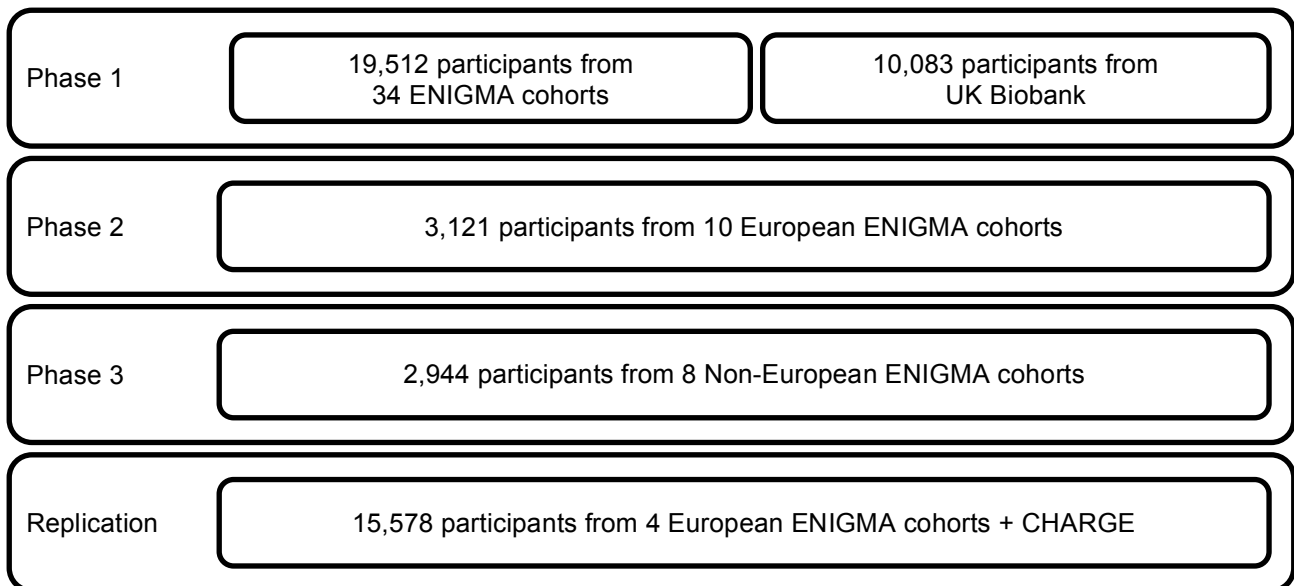

Supplementary Figure 1. Flow chart summarising the phases of meta-analysis.
