# Supplementary material for: The genetic architecture of the human cerebral cortex
Source: bioRxiv or medRxiv preprint supplement (doi:10.1101/399402), 2019-07-18
Supplement: Supplementary file [file 399402-2.pdf]

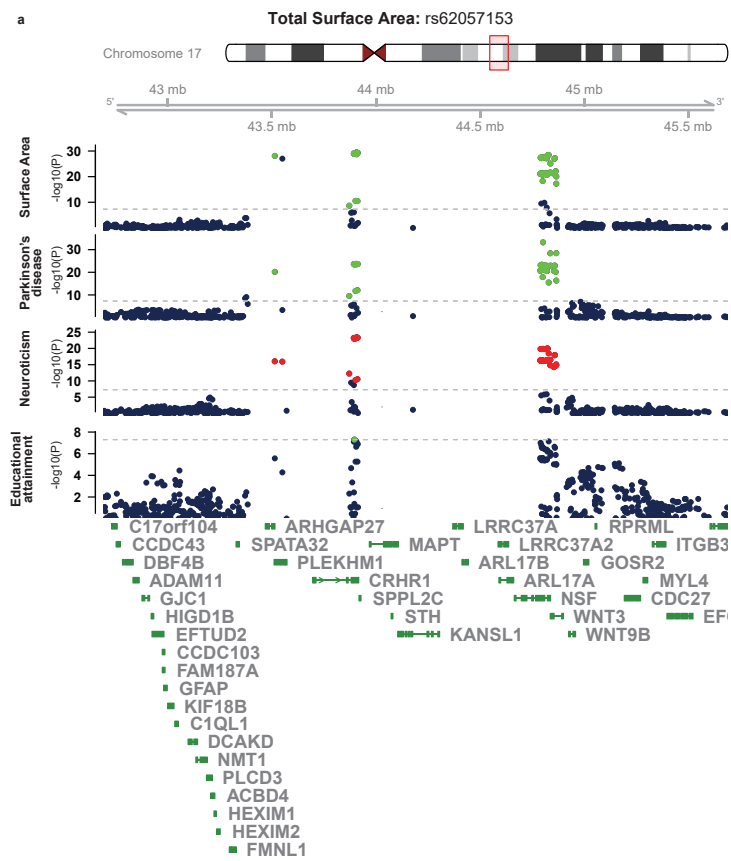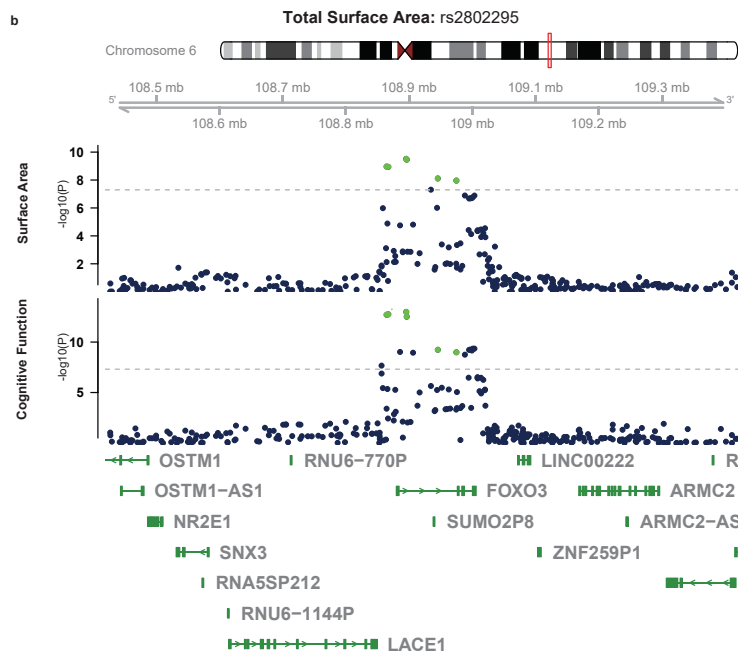

Supplementary Figure 2. Results of co-localisation analyses for a) the 17q21.31 inversion region and b) the 6q21 region. Green dots indicate SNPs with  $P < 5e-8$  in SA and other traits that are in the same direction (allele associated with increased surface area is also associated with increase in the trait). Red dots indicate SNPs with  $P < 5e-8$  in SA where the effect in the other trait is in the opposite direction.
