# Supplementary material for: The genetic architecture of the human cerebral cortex
Source: bioRxiv or medRxiv preprint supplement (doi:10.1101/399402), 2019-07-18
Supplement: Supplementary file [file 399402-3.pdf]

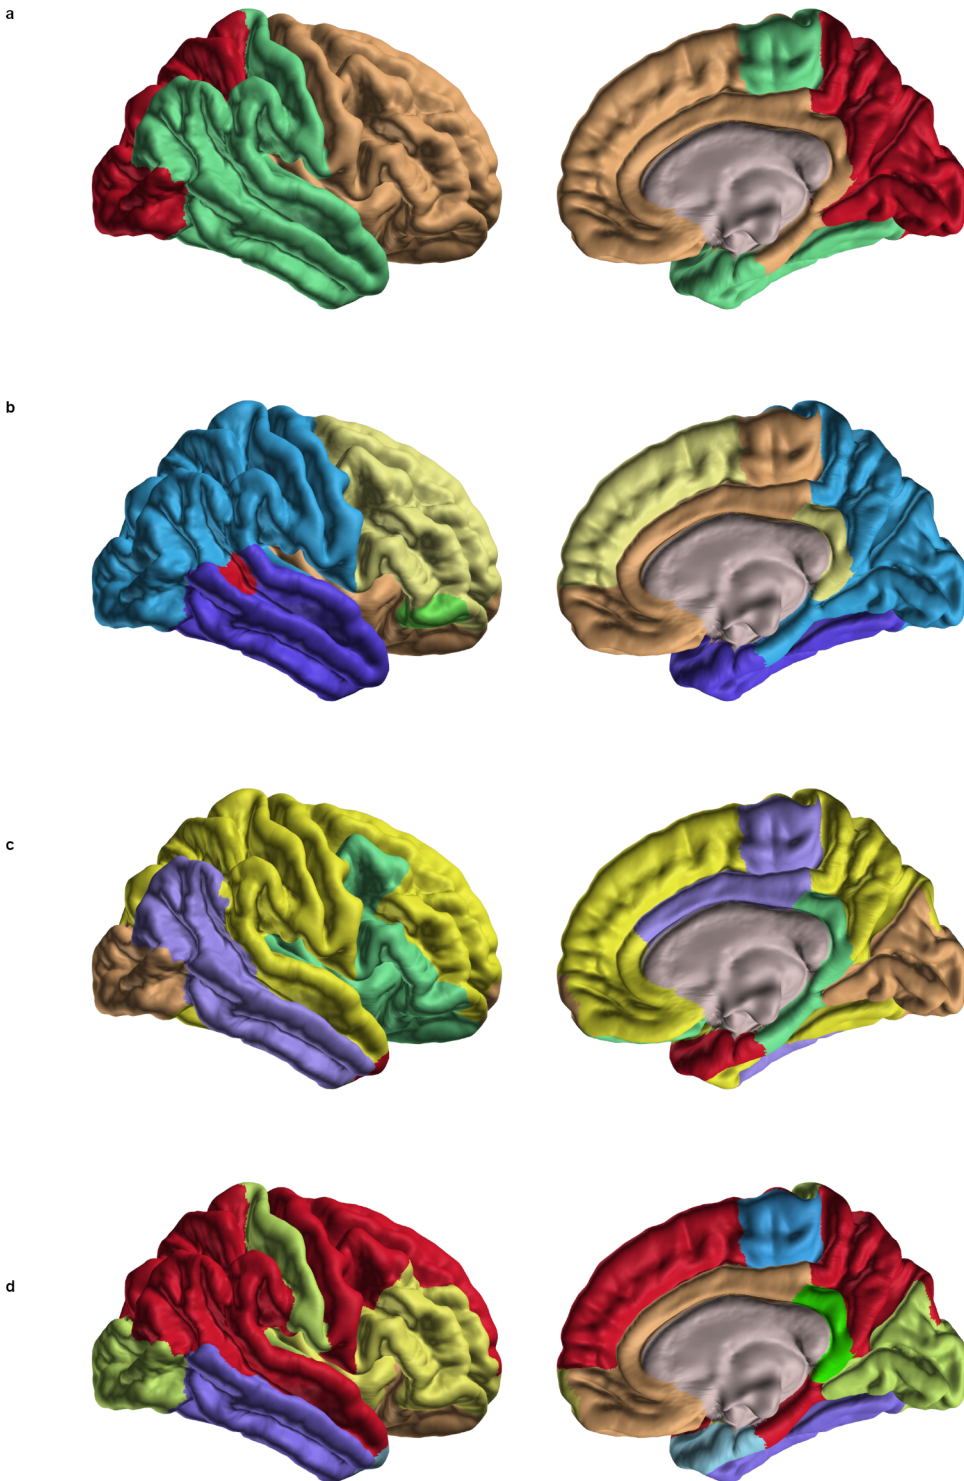

Supplementary Table 3. Clustering of genetic correlations among a) surface area and b) thickness regions after correcting for global measures. Clustering of genetic correlations among c) surface area and d) thickness regions without correcting for global measures. The best-fitting model for surface area with global correction was 3 diagonal components with varying volume and shape, and for thickness was 6 spherical components with equal volume. The best-fitting model for surface area without global correction was 5 spherical components with varying volume, and for thickness was 8 spherical components with equal volume.
