# Supplementary material for: The genetic architecture of the human cerebral cortex
Source: bioRxiv or medRxiv preprint supplement (doi:10.1101/399402), 2019-07-18
Supplement: Supplementary file [file 399402-4.pdf]

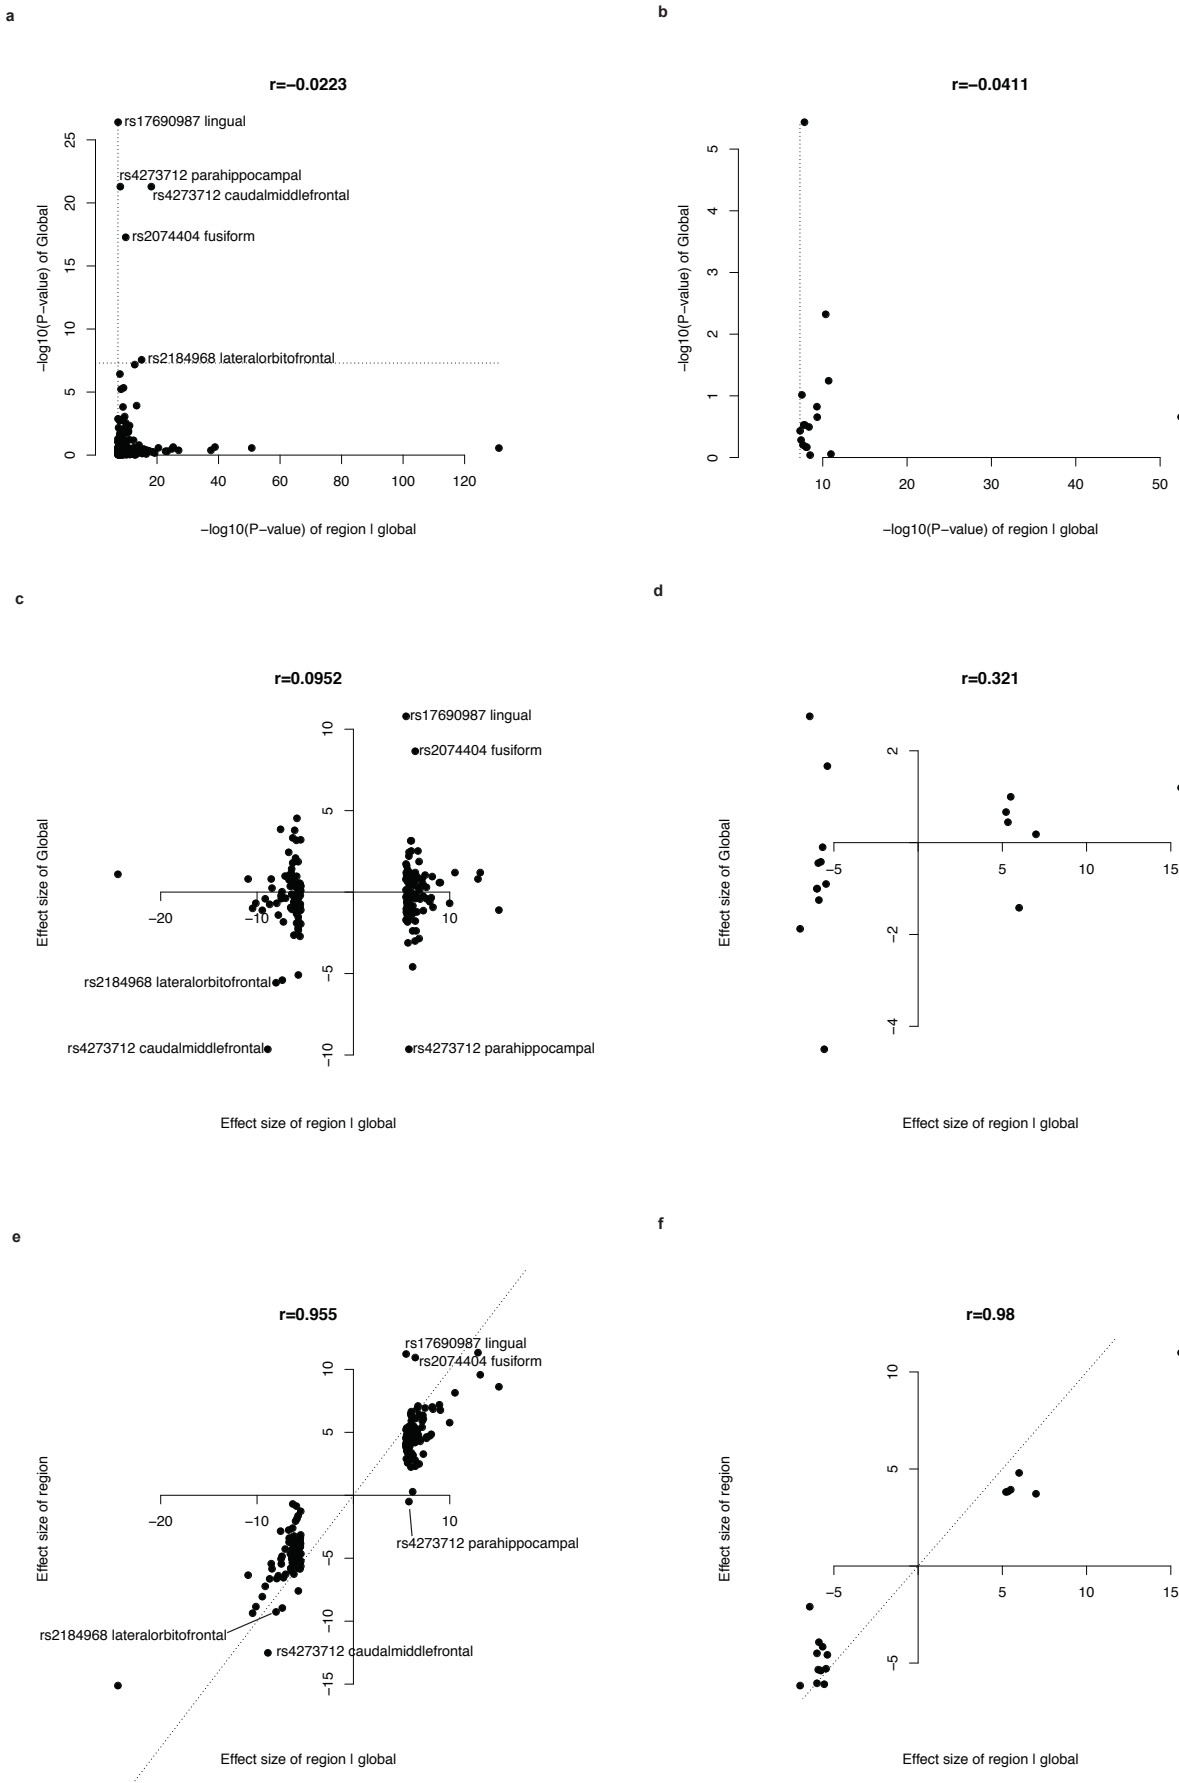

Supplementary Figure 4. P-value of genome-wide significant regional SNPs with global control compared to their P-value in the global measure for a) surface area and b) thickness. Effect size of genome-wide significant regional SNPs with global control compared to their effect size in global measures for c) surface area and d) thickness. Effect size of genome-wide significant regional SNPs with global control compared to regional SNPs without global control in e) surface area and f) thickness.
