# Supplementary material for: The genetic architecture of the human cerebral cortex
Source: bioRxiv or medRxiv preprint supplement (doi:10.1101/399402), 2019-07-18
Supplement: Supplementary file [file 399402-5.pdf]

Total Surface Area: rs12630663

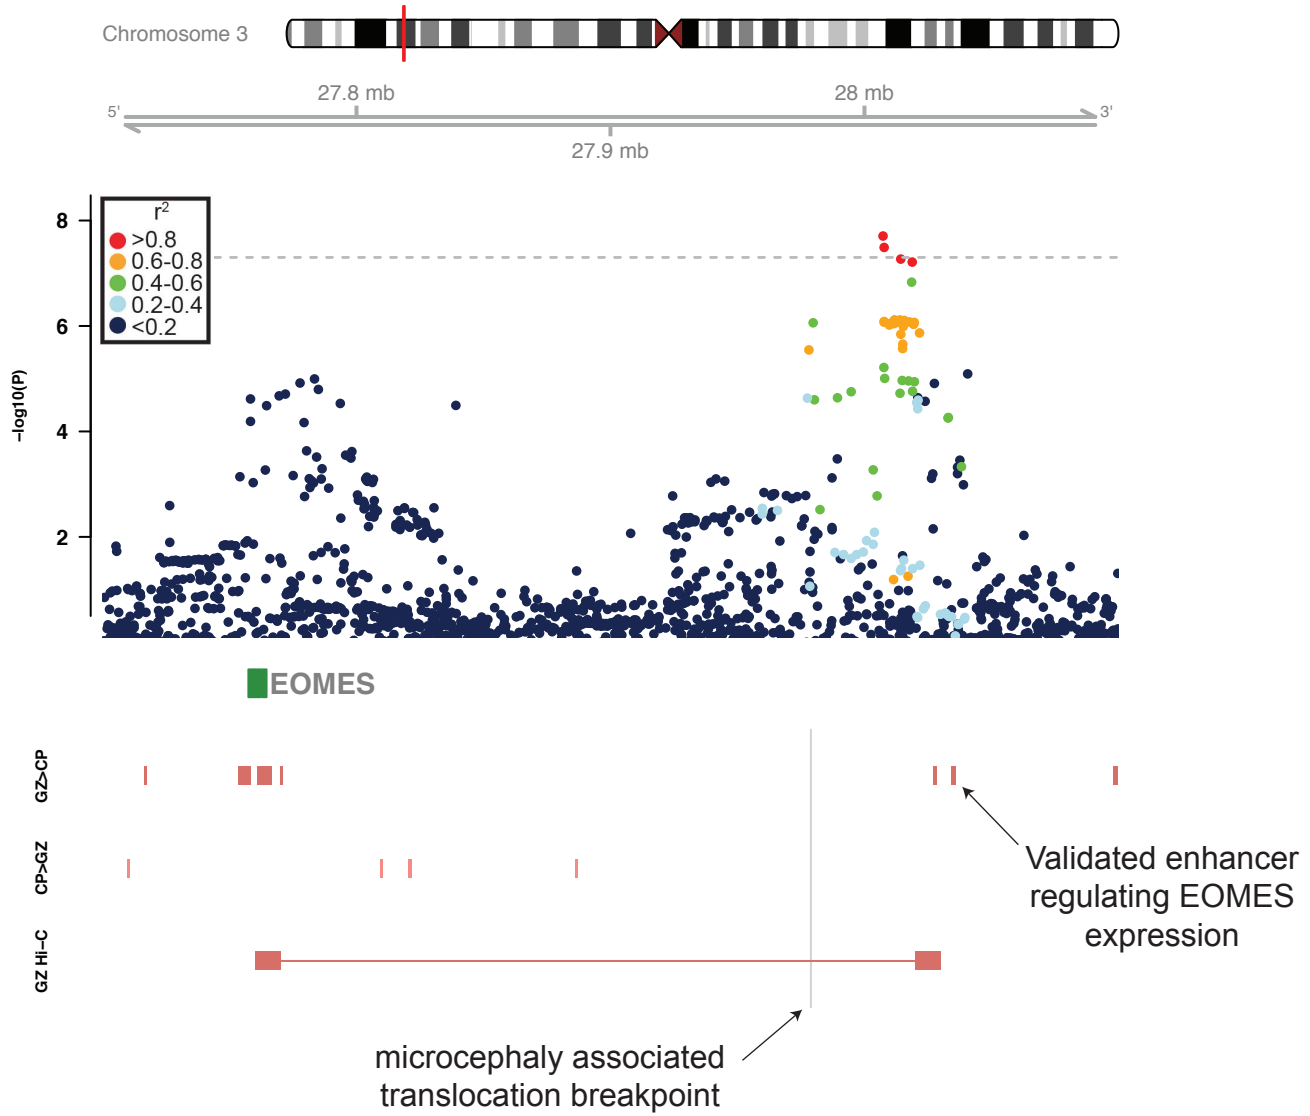

Supplementary Figure 5. Regional association plot for the 3p24.1 locus (rs12630663)
